# Supplementary material for: Sphingosine 1-phosphate-regulated transcriptomes in heterogenous arterial and lymphatic endothelium of the aorta
Source: eLife. 2020 Feb 24;9:e52690. doi: 10.7554/eLife.52690 (PMC7054001; doi:10.7554/eLife.52690)
Supplement: Supplementary file 1. — RSEM-generated FPKM values for all annotated transcripts are also included for each biological replicate. [file elife-52690-supp1.xlsx]

## Sheet: GFPlow.enriched
List of 1042 genes enriched (p-value <0.05 on EdgeR output) in GFPlow FACS sorted MAECs. Data presented in Figure 1C.								Females	Females	Males	Females	Females	Males
Gene	logFC	logCPM	LR	PValue	FDR	GFPlow.average.FPKM	GFPhigh.average.FPKM	GFPlow.356	GFPlow.358	GFPlow.362	GFPhigh.357	GFPhigh.359	GFPhigh.363
Retnla	-5.2615	-0.280562	12.5561	0.000394921	0.00730892	5.04333	0.126667	15.13	0	0	0	0.16	0.22
Hbb-b1	-3.29207	3.1386	8.99448	0.00270797	0.0356713	4.63	0.496667	12.14	0	1.75	0	0	1.49
Hbb-b2	-3.29207	3.1386	8.99448	0.00270797	0.0356713	3.83	0	10.54	0.11	0.84	0	0	0
Lgr6	-3.26829	2.446	50.0832	1.47366e-12	2.78434e-10	2.94333	0.333333	3.65	1.79	3.39	0.54	0.32	0.14
Beta-s	-3.21562	3.4075	8.0596	0.00452631	0.0540736	23.3167	2.41333	59.4	0.32	10.23	0.65	0.46	6.13
Ccl6	-3.14799	-1.09816	10.4878	0.00120166	0.0181742	0.79	0.0966667	2.12	0.05	0.2	0.08	0.21	0
Slc26a4	-3.07776	4.38447	23.4587	1.27624e-06	5.76998e-05	14.3533	1.73667	17.64	17.02	8.4	1.94	3.03	0.24
Hba-a1	-2.84306	4.67759	4.23751	0.0395402	0.253181	29.5067	2.69	63.89	0.4	24.23	0.1	0.18	7.79
Hba-a2	-2.84306	4.67759	4.23751	0.0395402	0.253181	23.52	4.27	65.39	0	5.17	0	0	12.81
Popdc3	-2.83533	0.672733	51.8121	6.10746e-13	1.33301e-10	1.73333	0.276667	1.58	1.58	2.04	0.29	0.17	0.37
Vipr1	-2.8278	5.2304	71.3689	2.96301e-17	1.56286e-14	15.7833	2.28333	12.11	17.88	17.36	2.09	2.74	2.02
Lamc3	-2.60711	4.40883	50.9191	9.62526e-13	1.99748e-10	6.84	1.13333	5.15	7.49	7.88	1.4	0.77	1.23
Pla2g5	-2.60477	6.2031	55.3177	1.02541e-13	2.59614e-11	78.58	13.1567	78.37	70.25	87.12	18.31	9.32	11.84
Wscd2	-2.55115	-0.104073	23.9296	9.99236e-07	4.61654e-05	0.383333	0.06	0.31	0.21	0.63	0.08	0.02	0.08
Kcnc4	-2.45149	-0.130437	16.3306	5.31988e-05	0.00142679	0.566667	0.1	0.79	0.29	0.62	0.22	0.02	0.06
Tac2	-2.43684	2.22291	49.3758	2.11332e-12	3.66472e-10	15.6433	2.68667	15.21	18.37	13.35	2.06	2.43	3.57
Slc25a21	-2.42182	1.20826	35.4984	2.55259e-09	2.46666e-07	1.67333	0.273333	2.07	1.71	1.24	0.44	0.15	0.23
Mrc2	-2.3776	2.11403	23.01	1.6116e-06	7.08377e-05	1.32333	0.246667	1.08	1.49	1.4	0.41	0.05	0.28
Lars2	-2.3615	9.33717	33.8934	5.8216e-09	4.97944e-07	322.333	64.47	399.25	276.57	291.18	103.74	35.7	53.97
Prnd	-2.35854	-0.275238	7.07678	0.00780892	0.0816293	0.643333	0.163333	0.34	0.07	1.52	0.16	0	0.33
Frzb	-2.3126	7.78944	46.1103	1.11779e-11	1.60797e-09	157.387	32.62	165.4	174.27	132.49	44.86	24.22	28.78
Cacna2d4	-2.28473	1.45	25.909	3.57906e-07	1.93621e-05	0.736667	0.12	0.57	0.84	0.8	0.18	0.05	0.13
Plin4	-2.26729	4.20782	24.1893	8.73183e-07	4.07883e-05	2.82333	0.583333	3.61	1.7	3.16	0.81	0.63	0.31
Xirp1	-2.26163	2.84603	22.8637	1.73908e-06	7.5914e-05	2.25	0.486667	2.79	1.06	2.9	0.84	0.29	0.33
Hcn2	-2.23376	-0.0912666	26.1739	3.12016e-07	1.73237e-05	0.516667	0.09	0.54	0.3	0.71	0.06	0.05	0.16
Jph2	-2.21289	2.73285	25.1564	5.28647e-07	2.69844e-05	3	0.626667	3.77	1.25	3.98	0.61	0.48	0.79
Shisa9	-2.21212	3.74515	26.9607	2.07634e-07	1.22253e-05	5.27667	1.14333	4.39	8.33	3.11	1.33	1.49	0.61
Sost	-2.18843	3.8565	17.1297	3.4913e-05	0.00100446	13.5433	3.06	7.46	6.69	26.48	2.65	2.03	4.5
Adra2a	-2.12622	6.74541	46.9057	7.44874e-12	1.10934e-09	55.1133	13.2167	52.87	59.56	52.91	13.93	15.63	10.09
Kcnq4	-2.09923	3.97773	39.3368	3.56657e-10	3.96046e-08	10.5833	2.52333	9.53	8.73	13.49	2.84	2.89	1.84
Myocd	-2.07947	1.85194	24.6507	6.87187e-07	3.33299e-05	1.09667	0.253333	1.26	0.53	1.5	0.34	0.3	0.12
Camk4	-2.06673	5.17915	40.5162	1.94997e-10	2.28561e-08	5.41333	1.30667	4.33	5.84	6.07	1.22	1.13	1.57
Crispld2	-2.05725	6.07666	32.885	9.7774e-09	8.08968e-07	30.4967	7.56667	41.15	29.48	20.86	9.56	5.49	7.65
Klk1b24	-2.03229	0.659412	10.1243	0.00146327	0.021489	3.25667	0.5	6.08	2.97	0.72	0.9	0.55	0.05
Grip2	-2.03134	1.97447	25.5827	4.23823e-07	2.25428e-05	1.31667	0.313333	1.89	0.64	1.42	0.33	0.31	0.3
Galntl1	-2.00709	2.62468	18.1441	2.04806e-05	0.000646545	2.95667	0.696667	3.67	1.51	3.69	1.13	0.57	0.39
Heph	-1.98629	5.29971	23.2561	1.418e-06	6.34294e-05	16.5367	4.24	22.14	17.71	9.76	6.3	4.05	2.37
Clec3b	-1.97396	2.05987	14.9942	0.000107843	0.00253751	8.88333	2.09333	4.92	4.05	17.68	2.25	1.46	2.57
Insrr	-1.96011	0.657257	17.1676	3.42227e-05	0.000995919	0.446667	0.123333	0.36	0.57	0.41	0.21	0.05	0.11
Aoc3	-1.95162	3.12529	20.7651	5.19206e-06	0.000194843	3.72667	0.99	5.24	2.31	3.63	1.54	0.52	0.91
Slc38a11	-1.94535	0.350537	20.2427	6.82149e-06	0.000247431	1.23333	0.226667	1.31	0.67	1.72	0.17	0.41	0.1
Lama2	-1.91668	1.58506	27.9754	1.22868e-07	7.55041e-06	0.496667	0.11	0.53	0.46	0.5	0.14	0.11	0.08
Srpx	-1.91342	1.13061	19.5821	9.63675e-06	0.000333311	1.67667	0.416667	2.38	1.32	1.33	0.75	0.27	0.23
Adcy5	-1.91039	3.75527	24.3086	8.20698e-07	3.89109e-05	4.40333	1.16333	3.41	2.72	7.08	1.27	1.25	0.97
Rnf112	-1.90506	2.00659	25.4652	4.50434e-07	2.38579e-05	2.2	0.59	2.46	1.79	2.35	0.9	0.41	0.46
Col9a1	-1.90063	1.58595	14.3692	0.000150238	0.00334248	1.27	0.293333	1.33	0.97	1.51	0.29	0.05	0.54
Lancl3	-1.89212	1.83659	19.8345	8.44439e-06	0.000296115	1.71333	0.463333	2.03	0.95	2.16	0.56	0.25	0.58
Sema6c	-1.8921	1.11077	18.9661	1.33061e-05	0.000440554	1.2	0.253333	1.13	1.21	1.26	0.3	0.37	0.09
Col4a3	-1.89141	7.55273	30.0482	4.21439e-08	2.94751e-06	40.2233	11.1033	34.45	35.13	51.09	14.64	8.25	10.42
Hr	-1.88768	3.51627	25.3757	4.71813e-07	2.47829e-05	3.68	1	3.45	2.84	4.75	1.5	0.66	0.84
Igsf9	-1.88084	0.84126	12.0328	0.000522726	0.00912716	0.693333	0.173333	0.58	0.17	1.33	0.24	0.09	0.19
3632451O06Rik	-1.87022	2.18016	31.262	2.25445e-08	1.70893e-06	2.97667	0.823333	2.88	3.5	2.55	0.91	0.57	0.99
Lrp1	-1.86478	4.82958	22.6797	1.91375e-06	8.29662e-05	3.32333	0.913333	3.52	2.85	3.6	1.5	0.61	0.63
Bmpr1b	-1.85985	0.654942	6.23845	0.0125006	0.11456	0.526667	0.126667	0.83	0.22	0.53	0.19	0.19	0
Sema3c	-1.85909	3.43273	26.8116	2.24282e-07	1.29643e-05	4.06	1.17333	5.41	2.67	4.1	1.53	1.06	0.93
Mir5109	-1.85833	1.48833	29.7655	4.87589e-08	3.35456e-06	234.373	47.2	213.23	200.68	289.21	33.64	34.99	72.97
Slc24a3	-1.8579	1.67055	19.8429	8.40726e-06	0.000295632	1.52333	0.416667	1.57	0.81	2.19	0.53	0.46	0.26
Trnp1	-1.85558	0.121862	20.8298	5.01945e-06	0.000189274	1.26333	0.363333	1.27	1.01	1.51	0.57	0.22	0.3
Adamtsl3	-1.85301	3.505	28.2469	1.06787e-07	6.6592e-06	2.72333	0.706667	2.48	3.54	2.15	0.85	0.51	0.76
Pde3b	-1.85215	6.45112	20.7403	5.25987e-06	0.000196415	31.01	8.89	31.82	37.38	23.83	12.22	10.62	3.83
Adamts15	-1.85214	1.7908	16.4529	4.98737e-05	0.00135483	1.07	0.293333	1.24	0.59	1.38	0.41	0.35	0.12
Fzd2	-1.84855	1.52997	21.041	4.49551e-06	0.000171929	1.46	0.38	1.94	0.78	1.66	0.47	0.27	0.4
Serpinb1c	-1.84713	2.44714	18.7454	1.4938e-05	0.000487373	4.65667	1.02333	3.51	3.73	6.73	1.12	0.39	1.56
Chad	-1.82324	5.30237	15.6177	7.7525e-05	0.00195886	46.7067	13.4833	27.85	61.69	50.58	6.18	12.79	21.48
Gxylt2	-1.82107	8.19976	34.3571	4.58726e-09	4.11845e-07	256.513	76.2433	205.84	262.52	301.18	67.97	85.83	74.93
Pcolce2	-1.81922	7.75925	34.5787	4.09367e-09	3.72818e-07	225.463	65.61	227.6	215.17	233.62	72.03	51.44	73.36
Ror2	-1.80782	1.6253	17.2098	3.34708e-05	0.000976283	1.39667	0.43	1.08	0.96	2.15	0.33	0.7	0.26
Pax9	-1.80132	2.4245	28.5563	9.10139e-08	5.87113e-06	3.49333	1.02333	3.17	4.43	2.88	1.13	0.97	0.97
Aldh1a1	-1.79896	3.87208	30.4816	3.37056e-08	2.43816e-06	13.76	4.04333	12.76	11.8	16.72	3.34	3.98	4.81
Col4a6	-1.79306	3.5726	24.8729	6.12369e-07	3.03999e-05	3.10667	0.89	3.55	2.04	3.73	1.1	0.62	0.95
Podn	-1.78692	1.0295	26.0561	3.31633e-07	1.80954e-05	1.15	0.333333	1.12	0.94	1.39	0.41	0.34	0.25
Col6a2	-1.78327	4.44131	18.9147	1.36693e-05	0.000449454	10.4967	3.09333	11.5	5.8	14.19	4.56	2.04	2.68
Cspg4	-1.78082	3.68107	15.4308	8.55818e-05	0.00212427	2.8	0.82	3.44	1.4	3.56	1.29	0.4	0.77
Aass	-1.77517	2.80281	13.3726	0.000255333	0.00524717	3.34	1.02333	3.48	4.19	2.35	1.65	1.13	0.29
Itga8	-1.76514	7.22649	18.5667	1.64061e-05	0.000529808	46.4667	14	69.04	30.58	39.78	22.27	10.52	9.21
Npy1r	-1.75832	3.72106	16.8935	3.95377e-05	0.00111472	7.47333	2.20333	10.59	5.02	6.81	3.62	1.36	1.63
Gpr133	-1.75735	3.32132	19.1864	1.18558e-05	0.000401289	3.36	0.993333	3.2	4.1	2.78	1.57	0.9	0.51
Col3a1	-1.75049	8.97247	15.5631	7.97989e-05	0.00199639	157.313	48.2467	157.8	93.8	220.34	62.85	21.82	60.07
Itga7	-1.74676	3.736	12.6782	0.000369941	0.0069072	5.60333	1.60333	5.81	2.32	8.68	1.47	0.82	2.52
Kcnma1	-1.7357	2.33246	21.013	4.56177e-06	0.000173938	1.66667	0.516667	1.88	0.9	2.22	0.36	0.64	0.55
Col1a1	-1.73251	7.23235	14.067	0.000176412	0.00379152	52.52	16.4067	51.91	30.6	75.05	20.4	6.91	21.91
Rian	-1.73175	1.40431	22.6231	1.97104e-06	8.51585e-05	0.963333	0.29	0.92	0.83	1.14	0.37	0.23	0.27
Sfrp1	-1.73125	9.72006	31.3867	2.11425e-08	1.61498e-06	345.61	107.587	275.33	404.1	357.4	120.35	103.91	98.5
Dtna	-1.72919	3.13028	19.0133	1.29809e-05	0.000432433	3.41	1.14	4.49	1.95	3.79	0.75	1.02	1.65
Grin3a	-1.72755	1.20653	8.3661	0.00382286	0.0470755	1.16333	0.386667	1.37	1.31	0.81	0.59	0.57	0
Rcan2	-1.72123	4.85617	20.3291	6.52017e-06	0.000237864	16.0767	4.96	20.84	8.29	19.1	6.19	4.16	4.53
C1qtnf7	-1.72112	3.47515	26.8812	2.16348e-07	1.2621e-05	13.4767	4.39667	12.45	16.15	11.83	5.08	3.17	4.94
Neo1	-1.71733	2.69779	25.1747	5.23656e-07	2.68379e-05	1.50667	0.446667	1.66	1.1	1.76	0.55	0.42	0.37
Omd	-1.71296	5.61413	29.3745	5.96575e-08	4.01704e-06	51.66	15.9733	59	48.64	47.34	20.8	12.92	14.2
Mrvi1	-1.7115	3.12531	12.7795	0.000350436	0.00669106	2.66	0.82	3.9	1.82	2.26	1.54	0.56	0.36
Susd5	-1.70791	5.5316	19.917	8.08799e-06	0.000285994	22.27	7.01667	25.25	12.57	28.99	8.72	5.08	7.25
Eln	-1.70774	11.3095	8.67124	0.00323272	0.0410873	1050.64	326.62	448.46	487.2	2216.27	255.63	188.01	536.22
Sfrp2	-1.70581	6.44558	7.39214	0.00655094	0.0721744	84.2067	26.4267	49.2	40.05	163.37	16.96	9.35	52.97
Gdf7	-1.70398	0.936966	16.0299	6.23496e-05	0.00163752	1.19667	0.5	1.12	0.76	1.71	0.14	0.69	0.67
Rps6ka2	-1.69931	5.61407	28.548	9.14063e-08	5.87113e-06	16.1767	5.13667	13.02	15.27	20.24	5.46	5.62	4.33
Fzd7	-1.68532	3.54942	23.2377	1.43164e-06	6.38141e-05	4.32333	1.44333	4.02	3.38	5.57	1.68	1.7	0.95
Abca8a	-1.6756	2.49782	14.0272	0.000180188	0.00384006	1.71	0.526667	1.98	1.99	1.16	0.62	0.79	0.17
Hs6st1	-1.67414	4.69302	13.6965	0.000214853	0.00451049	12.6633	4.04333	6.34	9.24	22.41	2.82	4.35	4.96
Kcnh2	-1.66974	3.47766	28.0667	1.17204e-07	7.23747e-06	4.22333	1.38	4.45	3.36	4.86	1.62	1.21	1.31
Ptprz1	-1.66865	4.21831	18.7564	1.48522e-05	0.000485825	3.80667	1.22333	5.16	2.67	3.59	1.31	1.69	0.67
Sdc3	-1.66059	6.52097	28.2718	1.05422e-07	6.60665e-06	33.01	10.67	27.73	32.14	39.16	10.66	12.44	8.91
Col6a1	-1.65989	5.1407	19.6675	9.21535e-06	0.000320505	15.6333	5.09	20.02	9.02	17.86	6.13	3.53	5.61
Olfr1033	-1.65213	3.13681	17.8113	2.43932e-05	0.000754995	0.543333	0.21	0.64	0.5	0.49	0.43	0.2	0
Olfm2	-1.64895	2.00081	17.4339	2.97473e-05	0.00089024	4.40667	1.50667	4.33	4.72	4.17	1.39	0.8	2.33
Clip4	-1.64588	0.49793	12.7434	0.000357274	0.00678473	0.666667	0.25	0.5	0.45	1.05	0.06	0.22	0.47
Fmod	-1.63556	3.82771	14.5401	0.000137207	0.00311274	9.20667	3.04333	11.94	5.27	10.41	4.53	3.15	1.45
Nwd1	-1.63522	0.805114	6.23125	0.0125515	0.114639	0.32	0.0933333	0.35	0.37	0.24	0.1	0.18	0
Itgb5	-1.62334	7.32049	18.9583	1.33607e-05	0.000440554	88.2267	29.4067	73.42	76.08	115.18	17.27	38.86	32.09
Spon2	-1.62046	0.111095	12.0974	0.000504918	0.00887744	0.836667	0.256667	0.5	0.54	1.47	0.14	0.42	0.21
Gm53	-1.61954	0.933457	20.3023	6.61215e-06	0.000240526	2.24333	0.673333	1.73	2.46	2.54	0.94	1.01	0.07
Pdgfrb	-1.61948	5.97321	13.8987	0.000192929	0.00408409	20.1	6.63667	17.55	22.65	20.1	10.37	7.11	2.43
Scube3	-1.60773	1.84997	13.0332	0.000306021	0.00597826	1.94	0.633333	2.39	0.84	2.59	0.58	0.43	0.89
Chrdl1	-1.60543	1.55933	12.7816	0.000350038	0.00669106	1.25	0.42	1.1	1.16	1.49	0.29	0.82	0.15
Irs2	-1.60502	2.04508	15.7485	7.23436e-05	0.00185384	1.80667	0.61	1.92	0.91	2.59	0.51	0.56	0.76
Col4a5	-1.6025	5.19306	22.4349	2.17389e-06	9.26574e-05	9.41667	3.17333	8.71	6.62	12.92	3.36	2.89	3.27
Sorl1	-1.602	3.75365	23.5176	1.23773e-06	5.63614e-05	3.27	1.04667	3.64	2.43	3.74	1.27	0.94	0.93
1500015O10Rik	-1.60187	7.24184	15.5575	8.00332e-05	0.00199831	361.617	121.097	310.6	295.57	478.68	129.73	61.25	172.31
Hs3st3a1	-1.60105	1.18576	14.1695	0.000167055	0.00362736	0.96	0.293333	0.93	0.89	1.06	0.2	0.13	0.55
Aldh3a1	-1.59775	6.52287	22.2075	2.44719e-06	0.000103052	108.597	36.8267	106.72	96.19	122.88	49.05	24.31	37.12
Sort1	-1.59655	5.32531	29.0975	6.88251e-08	4.56156e-06	10.1967	3.47333	9.34	10.96	10.29	3.63	3.72	3.07
Cbs	-1.59518	0.0192507	15.0794	0.000103085	0.00245753	0.673333	0.206667	1.05	0.46	0.51	0.31	0.16	0.15
Sv2a	-1.59372	-0.449794	10.0894	0.00149123	0.021849	0.266667	0.1	0.52	0.13	0.15	0.1	0.06	0.14
Gp1ba	-1.58603	4.1047	17.7634	2.50146e-05	0.000768592	10.4267	3.59667	12.47	11.19	7.62	5.6	2.72	2.47
Amy2a5	-1.58058	-0.184676	5.14021	0.0233778	0.178574	0	0	0	0	0	0	0	0
Klk1	-1.58012	-0.0964942	7.07699	0.00780803	0.0816293	1.95667	0.693333	3.78	1.67	0.42	1.25	0.57	0.26
Pla2g4f	-1.57901	3.36977	20.1421	7.18969e-06	0.000257831	4.80667	1.65	5.05	5.76	3.61	1.85	1.95	1.15
Plekha6	-1.57666	5.34709	24.9356	5.92771e-07	2.95428e-05	9.47	3.31667	8.21	10.29	9.91	4.24	3.03	2.68
Kif26a	-1.5759	4.48037	16.7486	4.26737e-05	0.00118727	5.35	1.83667	4	3.86	8.19	2.38	1.8	1.33
Podxl2	-1.57372	0.580234	9.89244	0.00165959	0.0237728	1.32667	0.37	1.4	0.62	1.96	0.08	0.25	0.78
Xk	-1.56561	2.21378	22.152	2.51888e-06	0.000105236	1.63667	0.556667	2.1	1.19	1.62	0.52	0.62	0.53
Gpr125	-1.56245	6.85298	15.2356	9.48971e-05	0.00229256	46.03	16.22	37.07	51.51	49.51	14.57	26.2	7.89
Adamtsl2	-1.56227	2.89374	21.7384	3.12479e-06	0.000127192	3.58	1.05667	3.12	4.02	3.6	1.3	1.16	0.71
Tmem117	-1.55656	1.19417	18.5444	1.65994e-05	0.000534686	1.35667	0.52	1.36	1.34	1.37	0.56	0.74	0.26
Slit2	-1.55577	2.3534	15.9084	6.64843e-05	0.00173174	1.03667	0.346667	1.31	1.07	0.73	0.49	0.31	0.24
Fgfr2	-1.55454	3.08169	16.5696	4.68956e-05	0.00128775	2.78	0.96	2.63	1.52	4.19	0.82	1.02	1.04
Gpr153	-1.55384	2.39012	24.5553	7.22071e-07	3.47555e-05	2.40333	0.826667	2.42	2.17	2.62	0.8	0.73	0.95
Dpep2	-1.55331	3.6144	26.8187	2.23463e-07	1.29643e-05	7.88333	2.47333	8.06	8.35	7.24	2.61	2.36	2.45
Lrp5	-1.5531	4.12031	21.3113	3.9042e-06	0.000152071	5.64667	1.90333	5.04	4.77	7.13	2.39	1.99	1.33
Rap1gap2	-1.55177	3.55229	19.5161	9.97553e-06	0.000344088	3.06333	1.04667	2.21	3.43	3.55	1.36	1.02	0.76
Fam151a	-1.54968	3.58062	18.3092	1.87803e-05	0.000598841	0.01	0	0	0.03	0	0	0	0
Adcy3	-1.54917	5.08673	23.8857	1.02231e-06	4.70595e-05	12.4233	3.72667	9.94	11.47	15.86	3.82	3.5	3.86
Ace	-1.54801	10.0103	17.5535	2.79341e-05	0.000838583	367.4	133.77	298.79	406.22	397.19	180.58	143.17	77.56
Sel1l3	-1.54713	0.913099	6.84244	0.00890174	0.0905845	0.656667	0.22	0.69	0.27	1.01	0.18	0.02	0.46
E030013I19Rik	-1.53905	4.51149	12.7369	0.000358514	0.00678473	9.9	3.58	13.49	5.03	11.18	3.59	1.78	5.37
6330403A02Rik	-1.53871	0.792789	16.1051	5.9921e-05	0.001577	0.41	0.126667	0.51	0.34	0.38	0.15	0.06	0.17
Acpp	-1.53838	4.66462	8.42022	0.0037107	0.0460076	10.1267	3.54	12.23	13.44	4.71	6.52	2.93	1.17
Frmd5	-1.53547	3.86328	13.1745	0.000283792	0.00567854	5.15667	1.82	6.13	5.72	3.62	2.69	2.06	0.71
Myh11	-1.53369	7.86999	21.3766	3.77356e-06	0.000147893	60.6667	21.4633	74.68	39.98	67.34	23.29	19.45	21.65
Casq1	-1.53149	2.23942	9.42561	0.00213976	0.0293469	4.39667	1.53	4.51	1.92	6.76	1.94	0.57	2.08
Wif1	-1.53054	1.81296	16.578	4.66905e-05	0.0012849	2.71667	0.963333	4.13	1.77	2.25	1.12	0.97	0.8
Smoc1	-1.52719	9.02728	14.0422	0.000178756	0.00382242	268.657	97.0367	260.91	267.2	277.86	150.63	99.9	40.58
Tro	-1.52435	0.992126	10.544	0.00116567	0.0177359	0.35	0.17	0.3	0.44	0.31	0.2	0.15	0.16
Rasl11b	-1.52251	3.36964	21.4068	3.71456e-06	0.000147143	10.5333	3.88667	9.6	8.29	13.71	3.62	4.07	3.97
Smpd3	-1.51623	5.97082	13.6173	0.000224107	0.00467377	20.83	7.46333	12.78	14.58	35.13	7.06	6.51	8.82
Hpse	-1.51137	5.1653	19.6951	9.08362e-06	0.000317651	21.1767	7.65667	23.26	26.28	13.99	8.89	8.46	5.62
Lrtm2	-1.50791	2.36706	20.5106	5.93012e-06	0.000220145	2.62667	0.96	2.64	2.64	2.6	1.19	1.11	0.58
Gja5	-1.50706	9.73841	17.7367	2.53681e-05	0.000774926	490.833	179.633	427.76	542.34	502.4	256.75	179.38	102.77
Prdm6	-1.50697	1.45964	14.8741	0.000114933	0.0026696	1.76333	0.633333	1.66	1.18	2.45	0.49	0.54	0.87
Notch4	-1.50648	6.3482	25.2115	5.13755e-07	2.65454e-05	20.4833	7.33667	17.99	20.98	22.48	8.14	7.55	6.32
Grem2	-1.50558	-0.423566	4.93653	0.0262948	0.193978	0.356667	0.126667	0.77	0.2	0.1	0.27	0.04	0.07
Ror1	-1.50491	2.39663	18.5175	1.68355e-05	0.000540915	2.45333	0.923333	2.27	2.07	3.02	0.66	0.8	1.31
Slc16a1	-1.50472	0.308583	4.49153	0.0340631	0.229976	0.45	0.173333	0.43	0.32	0.6	0.16	0.36	0
Col4a4	-1.50309	6.19501	17.272	3.23927e-05	0.000955848	13.8633	4.72333	11.34	10.45	19.8	5.56	3.17	5.44
Klhl30	-1.50078	1.39561	14.6365	0.000130368	0.00297894	1.44333	0.53	1.62	0.87	1.84	0.75	0.45	0.39
Prrt4	-1.49919	6.13654	15.8177	6.97451e-05	0.00179452	33.75	12.3	27.34	26.84	47.07	9.62	10	17.28
Cyp1b1	-1.49912	8.99742	21.5072	3.52495e-06	0.000141658	175.343	64.2933	156.37	211.86	157.8	78.8	69.28	44.8
Ephb3	-1.49444	0.577889	16.1652	5.8051e-05	0.0015406	0.56	0.2	0.37	0.57	0.74	0.2	0.15	0.25
Twist1	-1.49379	4.65346	16.7186	4.33541e-05	0.00120355	27.8867	10.3567	18.52	29.37	35.77	7.23	10.78	13.06
Mst1r	-1.49159	1.12006	13.1157	0.000292833	0.00576512	0.726667	0.213333	0.66	0.86	0.66	0.34	0.1	0.2
B3galt1	-1.48838	2.11149	17.6025	2.72236e-05	0.000822492	1.48333	0.53	1.86	1	1.59	0.5	0.69	0.4
Slc16a5	-1.48502	1.20299	15.2549	9.39328e-05	0.0022736	0.866667	0.333333	0.93	0.94	0.73	0.28	0.17	0.55
Fat1	-1.4805	3.41518	12.5341	0.0003996	0.00735252	1.13667	0.416667	1.13	0.62	1.66	0.52	0.25	0.48
1190002N15Rik	-1.48008	6.86625	15.8367	6.90501e-05	0.00178389	54.0267	20.0933	66.27	61.55	34.26	21.6	26.6	12.08
Wnk4	-1.47347	5.05	17.26	3.2597e-05	0.000959642	12.86	4.63	12.2	14.88	11.5	6.71	4.61	2.57
Aff3	-1.47325	1.5541	6.53004	0.0106068	0.102466	0.776667	0.26	0.91	0.84	0.58	0.38	0.37	0.03
Gm7694	-1.47162	5.29753	17.1413	3.47001e-05	0.00100446	17.5933	6.67667	16.39	19.26	17.13	8.14	8.33	3.56
Slc25a33	-1.47151	3.24794	19.411	1.054e-05	0.000360609	9.24667	3.36667	9.46	8	10.28	2.56	3.21	4.33
Itih4	-1.46425	4.60121	14.6659	0.000128351	0.00294346	13.6267	5.05667	20.11	8.23	12.54	6.48	5.31	3.38
Etv1	-1.46311	0.852278	12.5507	0.000396059	0.00730961	0.73	0.28	0.97	0.61	0.61	0.46	0.16	0.22
Veph1	-1.46181	0.507672	15.4047	8.67713e-05	0.00214539	0.383333	0.126667	0.33	0.37	0.45	0.17	0.08	0.13
Synpo2	-1.46103	4.65876	19.3105	1.11093e-05	0.000378045	6.09333	2.24	7.47	4.72	6.09	2.94	2.12	1.66
Nkx2-3	-1.45942	4.63425	21.5193	3.50287e-06	0.000141219	19.87	7.43	19.73	19.17	20.71	5.79	7.42	9.08
Rasl12	-1.4548	4.84613	11.7248	0.000616726	0.0104935	21.6767	8.05667	27.45	10.82	26.76	7.97	4.89	11.31
Mmp16	-1.45253	3.50916	19.0318	1.28556e-05	0.00042939	4.1	1.51	4.14	4.39	3.77	2.08	1.42	1.03
Ptprj	-1.45095	7.66036	17.407	3.01717e-05	0.000899848	43.3767	16.3767	40.02	51.02	39.09	21.33	18.4	9.4
Adamts2	-1.44126	4.2401	11.4622	0.000710244	0.0117837	8.38	3.06333	7.64	5.12	12.38	2.1	2.07	5.02
Tmc7	-1.44082	2.57493	22.0496	2.65701e-06	0.000110279	2.23	0.83	2.02	2.5	2.17	0.81	0.87	0.81
Gbx2	-1.43929	2.41566	14.2872	0.00015693	0.00343699	3.65	1.42333	3.35	3.5	4.1	1.31	0.83	2.13
Adam11	-1.43877	1.24194	15.7048	7.40366e-05	0.00188958	0.72	0.27	0.7	0.51	0.95	0.32	0.19	0.3
Pm20d2	-1.43291	4.19783	22.5816	2.01408e-06	8.67217e-05	5.61333	2.12667	5.07	5.95	5.82	2.21	2.4	1.77
Kcnj2	-1.43234	1.63682	5.01317	0.0251553	0.188092	0.943333	0.346667	1.16	1.26	0.41	0.72	0.27	0.05
Mknk2	-1.4284	7.66381	21.3459	3.83439e-06	0.000149813	111.853	43.1767	97.93	96.06	141.57	43.25	45.12	41.16
Gdf6	-1.42567	3.93048	7.60654	0.00581571	0.0653248	7.37667	2.94333	3.43	3.57	15.13	2.86	2.5	3.47
Bmpr1a	-1.42272	6.76729	16.8357	4.07603e-05	0.00114663	34.4433	13.34	39.11	38.83	25.39	17.2	14.73	8.09
Trim36	-1.42024	0.146992	5.2958	0.0213769	0.16725	0.356667	0.11	0.49	0.21	0.37	0.11	0.22	0
Bmp6	-1.41806	9.29944	16.4346	5.03566e-05	0.00136373	402.677	154.187	295.73	357.21	555.09	120.66	186.19	155.71
Rbm24	-1.41765	0.379377	15.2652	9.34234e-05	0.00226784	0.653333	0.25	0.82	0.47	0.67	0.25	0.22	0.28
Heyl	-1.41579	4.48543	20.105	7.33044e-06	0.000262136	8.36333	3.27	9.21	7.12	8.76	4.01	3.4	2.4
Abcc9	-1.41361	3.00375	8.88136	0.00288097	0.0375076	1.78	0.653333	2.49	1.56	1.29	1.23	0.44	0.29
S100b	-1.40972	2.81456	15.5644	7.97399e-05	0.00199639	7.75667	2.73667	7.44	9.08	6.75	2.78	1.68	3.75
Nacad	-1.40855	2.5359	15.996	6.34764e-05	0.00166022	1.87	0.71	1.96	1.37	2.28	1.05	0.61	0.47
Clstn1	-1.40806	6.8122	9.09101	0.00256868	0.0341565	51.8333	19.6567	21.3	49.92	84.28	12.51	30.8	15.66
Sdc2	-1.40412	7.19346	21.3776	3.7715e-06	0.000147893	77.6333	30.2467	68.59	74.16	90.15	33.96	27.05	29.73
Olfml3	-1.40126	2.42981	15.684	7.48532e-05	0.00190274	5.78667	2.18667	8.18	5.27	3.91	2.71	1.75	2.1
Gpha2	-1.40114	1.42494	10.9221	0.000950231	0.015055	9.93333	3.68	10.13	12.94	6.73	2.94	2.01	6.09
Myom1	-1.39976	3.25511	9.93696	0.00161993	0.023303	2.63667	0.916667	4.29	1.62	2	1.47	0.64	0.64
Dlgap1	-1.3988	2.3553	14.4854	0.000141251	0.00318734	1.64667	0.55	1.67	2.05	1.22	0.7	0.38	0.57
Ogn	-1.39799	6.50391	11.2442	0.000798725	0.0130129	63.6	24.4933	96.73	33.19	60.88	30.06	15.07	28.35
Acot11	-1.39676	5.03048	17.7838	2.4748e-05	0.000762252	9.41	3.59667	8.1	10.79	9.34	4.32	4.22	2.25
Ubxn10	-1.39649	1.53389	17.5589	2.78543e-05	0.000838583	1.72333	0.673333	2.12	1.67	1.38	0.7	0.5	0.82
Heg1	-1.39086	7.54967	17.8005	2.45315e-05	0.000757427	47.3667	17.4767	38.87	51.31	51.92	20.5	23.15	8.78
Gpc4	-1.38789	4.9638	16.8098	4.13189e-05	0.00115465	23.71	9.40667	23.92	22.18	25.03	13.84	7.03	7.35
Olfml2b	-1.38783	4.52575	13.5964	0.000226623	0.00471845	13.2767	5.16	17.39	7.59	14.85	5.52	3.66	6.3
Gpm6b	-1.387	1.48938	9.03044	0.00265521	0.0350859	1.03	0.42	1.28	1	0.81	0.75	0.39	0.12
Atrnl1	-1.38503	5.08058	15.9471	6.51383e-05	0.00170018	8.53333	3.27667	6.51	10.22	8.87	4.58	2.96	2.29
Dact3	-1.38	2.47293	6.90581	0.0085916	0.0879943	3.15667	1.16333	2.45	1.84	5.18	0.83	0.5	2.16
Sntg2	-1.37924	4.9632	20.2193	6.90539e-06	0.000249758	21.91	8.52	24.26	20.61	20.86	9.3	6.93	9.33
Gabra3	-1.37912	2.36794	15.8876	6.72184e-05	0.00174726	2.35	0.936667	2.32	1.67	3.06	1.14	0.82	0.85
Gpam	-1.3789	2.97849	8.51395	0.00352433	0.0439986	3.08333	1.23333	3.1	3.55	2.6	1.89	1.45	0.36
Optc	-1.37878	-0.0465784	6.06818	0.0137638	0.121598	0.886667	0.32	0.69	0.53	1.44	0.35	0.02	0.59
Hspb7	-1.37662	3.92768	11.8274	0.000583654	0.00997094	9.29	3.65	11.75	4.64	11.48	4.5	2.61	3.84
Klhdc8a	-1.3755	-0.00629788	9.38209	0.00219115	0.0300193	0.39	0.13	0.25	0.25	0.67	0.06	0.16	0.17
Fam160a1	-1.37433	3.68917	17.08	3.58378e-05	0.00102409	4.39	1.76333	4.5	4.36	4.31	2.32	1.85	1.12
Fgf13	-1.37219	2.58576	16.2308	5.60738e-05	0.00149126	4.10333	1.67667	3.83	4.3	4.18	1.6	1.22	2.21
Dmpk	-1.36888	4.93667	11.2829	0.000782227	0.012777	18.77	7.38	22.6	9.81	23.9	6.1	5.52	10.52
Kctd12	-1.36757	6.59276	20.5883	5.6942e-06	0.000212008	27.48	11.0533	26.41	25.26	30.77	13.06	9.75	10.35
Galnt6	-1.36593	0.0736246	7.32341	0.00680623	0.0742759	0.286667	0.113333	0.19	0.18	0.49	0.04	0.08	0.22
Ldb3	-1.36578	2.98793	12.5434	0.000397607	0.00732651	3.38667	1.38	4.49	1.79	3.88	2.04	0.64	1.46
Ism1	-1.36346	3.37801	17.2229	3.32397e-05	0.000971782	6.14	2.48333	5.63	6.28	6.51	3.34	2.39	1.72
Fndc1	-1.36064	7.12731	17.323	3.15347e-05	0.000932706	39.2267	15.7867	27.89	43.13	46.66	17.63	17.26	12.47
Fgfrl1	-1.35172	6.17967	16.2763	5.47455e-05	0.00146207	48.96	19.8867	41.12	40.78	64.98	15.68	22.32	21.66
Kcnab1	-1.34941	4.48024	12.9328	0.000322873	0.00624961	12.8067	5.13667	18.96	7.59	11.87	6.65	4.36	4.4
4732416N19Rik	-1.34881	2.68036	13.2836	0.000267737	0.00545777	0.116667	0.04	0.15	0.2	0	0.12	0	0
Pi15	-1.34663	3.64824	11.6372	0.00064646	0.0108679	2.97333	1.19	3.85	1.79	3.28	1.75	1.12	0.7
Snx18	-1.3444	6.66793	19.8739	8.27206e-06	0.000291688	38.8967	15.94	35.18	36.98	44.53	16.18	18.17	13.47
Lhfp	-1.34305	7.92873	15.0192	0.000106425	0.0025135	213.2	85.9267	200.64	165.87	273.09	90.23	61.52	106.03
Rarres1	-1.34225	0.244512	6.67165	0.00979583	0.0977465	1.50333	0.566667	2.04	0.65	1.82	0.49	0.16	1.05
G0s2	-1.34194	4.98476	9.78165	0.00176262	0.0250146	81.6467	32.2233	86.52	92.97	65.45	27.45	15.14	54.08
Bcmo1	-1.3404	2.04916	16.7835	4.18961e-05	0.0011682	2.65333	0.976667	2.81	2.5	2.65	0.94	0.84	1.15
Cdh26	-1.34031	4.28952	12.234	0.000469262	0.00836674	10.35	4.14	7.79	9.13	14.13	3.09	3.1	6.23
Syde2	-1.33737	2.33301	15.195	9.6959e-05	0.00233347	1.52667	0.62	1.94	1.24	1.4	0.78	0.47	0.61
Spon1	-1.33699	9.5665	11.5936	0.000661807	0.0110818	204.103	84.1767	219.36	235.45	157.5	134.83	73.42	44.28
Glce	-1.33606	7.27174	9.43336	0.00213073	0.0292548	57.2867	23.57	64.29	66.24	41.33	36.61	25.4	8.7
Gfra4	-1.32984	0.237206	8.93638	0.00279547	0.0365577	0.823333	0.27	0.87	0.35	1.25	0.15	0.19	0.47
Fgfr4	-1.3271	2.64295	16.656	4.48082e-05	0.00123849	3.24667	1.29667	3.35	2.9	3.49	1.62	1.08	1.19
Tspyl5	-1.32652	2.30958	12.3984	0.000429709	0.00779324	2.12333	0.883333	2.01	2.12	2.24	0.85	1.35	0.45
Lpar1	-1.32137	5.15821	14.0528	0.000177749	0.00381283	17.9033	7.28667	12.43	19.86	21.42	7.27	5.47	9.12
Scara5	-1.32095	2.60397	12.372	0.000435821	0.00788152	2.78667	1.12667	3.38	2.74	2.24	1.4	0.61	1.37
Cilp	-1.32024	1.31687	4.64033	0.0312289	0.21751	0.983333	0.35	1.12	1.36	0.47	0.84	0.01	0.2
Mapk8ip1	-1.31623	2.04945	10.8091	0.00101002	0.0157461	2.10667	0.893333	1.33	2.19	2.8	0.82	0.53	1.33
P4ha3	-1.31595	3.61413	9.16312	0.00246941	0.033185	8.66	3.47667	5.9	7.49	12.59	1.58	3.91	4.94
Hspg2	-1.31514	6.3394	9.5512	0.00199818	0.0276448	8.61	3.52333	8.25	6.26	11.32	5.74	3.29	1.54
Ncam1	-1.31513	6.51486	15.4205	8.60518e-05	0.00213176	23.9867	10.0367	23.59	25.39	22.98	14.38	9.18	6.55
Gm11149	-1.3124	3.68657	11.443	0.000717649	0.0118755	0.07	0	0.07	0.05	0.09	0	0	0
Gm12824	-1.31184	1.69627	9.52015	0.00203228	0.0280552	0.8	0.33	1.17	0.39	0.84	0.4	0.19	0.4
Pnldc1	-1.31174	0.327013	5.95058	0.0147125	0.127391	0.87	0.306667	1.24	0.41	0.96	0.44	0	0.48
Des	-1.30858	3.17541	6.43296	0.0112022	0.106471	7.34	2.97667	7.99	3.08	10.95	3.51	1.11	4.31
Zbtb42	-1.30756	2.77511	15.0329	0.000105653	0.00249993	3.38667	1.36	3.1	2.97	4.09	1.47	1.72	0.89
Sytl5	-1.30755	1.61513	6.68124	0.00974329	0.0975794	1.70667	0.653333	1.78	1.94	1.4	0.82	0.96	0.18
Slc2a4	-1.30221	0.625663	11.9468	0.000547413	0.00945389	0.91	0.363333	1.14	0.74	0.85	0.5	0.24	0.35
Rgs4	-1.30082	4.34853	12.1321	0.0004956	0.00873122	12.43	5.09	16.16	7.72	13.41	4.53	3.98	6.76
Egfr	-1.29966	1.35468	10.8706	0.000977054	0.0154124	0.936667	0.503333	1.12	0.71	0.98	0.7	0.45	0.36
Adrbk2	-1.29914	1.99799	11.6801	0.000631731	0.0107199	1.42333	0.783333	1.45	1.55	1.27	1.04	0.65	0.66
Shroom3	-1.29912	4.9803	16.2819	5.45826e-05	0.00146081	7.35	3.14	6.06	7.27	8.72	3.16	3.89	2.37
Actg2	-1.29596	4.34251	9.86019	0.00168894	0.0240849	28.4367	11.6233	37.46	13.83	34.02	11.86	7.29	15.72
Tcfcp2l1	-1.29476	1.85023	6.64274	0.00995605	0.0986964	0.596667	0.27	0.77	0.68	0.34	0.51	0.22	0.08
Kcnmb1	-1.29407	4.06948	7.91214	0.00491041	0.0575986	6.73	2.78	8.95	3.27	7.97	2.77	1.35	4.22
Pitpnm3	-1.29393	3.73357	18.3716	1.81745e-05	0.000580987	3.12667	1.34	2.94	3.22	3.22	1.49	1.42	1.11
Tead3	-1.29379	0.796901	11.607	0.000657054	0.0110167	1.1	0.47	1.23	0.8	1.27	0.58	0.56	0.27
Hsd11b1	-1.29263	3.53238	10.4337	0.00123737	0.0186067	15.6867	6.30667	15.92	15.55	15.59	5.84	3.18	9.9
Mgat3	-1.29248	1.12772	14.9257	0.000111827	0.00261666	0.76	0.313333	0.79	0.64	0.85	0.32	0.37	0.25
Cacnb2	-1.2924	0.932111	6.40722	0.0113657	0.107533	0.92	0.316667	1.37	0.61	0.78	0.56	0.29	0.1
Celsr2	-1.28954	1.9449	15.6419	7.65378e-05	0.00193778	0.536667	0.223333	0.53	0.49	0.59	0.28	0.16	0.23
Thbs1	-1.28697	10.1211	9.68373	0.00185907	0.0260332	316.49	136.217	155.93	380.82	412.72	161.78	165.64	81.23
Nalcn	-1.2838	3.34989	12.2495	0.000465371	0.00830906	2.23667	0.95	2.33	2.78	1.6	1.33	0.92	0.6
Slamf8	-1.2836	0.300462	8.51941	0.00351378	0.0439279	0.96	0.423333	1.14	1.32	0.42	0.39	0.61	0.27
Ccdc60	-1.28232	0.411117	12.5504	0.000396113	0.00730961	0.75	0.26	0.74	0.57	0.94	0.25	0.17	0.36
Col1a2	-1.28201	8.36701	12.8562	0.000336361	0.00647111	101.67	43.21	99.54	67.44	138.03	53.7	31.97	43.96
Pcdh19	-1.27785	3.35815	14.475	0.000142028	0.00319918	1.61667	0.7	1.19	1.77	1.89	0.81	0.8	0.49
Ptprd	-1.27728	3.47883	15.0604	0.000104123	0.00247761	1.93	0.823333	2.15	1.59	2.05	1.13	0.73	0.61
Mpst	-1.27607	0.151198	7.13683	0.00755165	0.0798467	1.47667	0.596667	1.17	1.23	2.03	0.96	0.67	0.16
Fam47e	-1.27511	0.510582	7.89142	0.00496699	0.0580583	1.30667	0.473333	0.71	1.48	1.73	0.54	0.14	0.74
Pcdh9	-1.27417	4.74369	7.91081	0.00491401	0.0575986	7.86	3.34333	8.13	9.89	5.56	4.97	3.97	1.09
Actc1	-1.27309	-0.110585	5.29145	0.0214304	0.167358	0.98	0.296667	1.9	0.23	0.81	0.41	0.48	0
Nox4	-1.27178	5.31876	14.0501	0.000178006	0.00381283	18.6133	7.95667	24.64	15.4	15.8	9.48	9.06	5.33
Aff2	-1.26965	2.3131	13.983	0.000184467	0.00391151	1.63333	0.71	1.13	1.44	2.33	0.63	0.73	0.77
Nptxr	-1.26912	3.53908	15.3207	9.07149e-05	0.00221533	0.536667	0.303333	0.57	0.32	0.72	0	0.17	0.74
Slc43a1	-1.26813	4.48808	14.9688	0.000109301	0.00256705	14.1967	5.97	16.09	14.85	11.65	7.47	6.33	4.11
Lrrc3b	-1.26732	5.65832	15.1767	9.79017e-05	0.00234978	55.94	24.28	65.8	63.29	38.73	28.21	25.63	19
Dok2	-1.26713	0.733361	12.722	0.000361382	0.00680764	1.51667	0.666667	1.55	1.37	1.63	0.94	0.55	0.51
Gpc6	-1.26138	5.72542	14.2885	0.000156818	0.00343699	12.8667	5.53667	11.57	9.76	17.27	6.95	5.21	4.45
Nos1ap	-1.25896	4.00718	11.9594	0.000543717	0.00940513	8.79667	3.82667	9.07	9.54	7.78	4.38	5.06	2.04
Bex4	-1.25628	2.09898	15.8402	6.8921e-05	0.00178389	10.5567	4.45667	11.44	9.61	10.62	5.41	4.02	3.94
Pdzrn3	-1.25228	1.1701	8.87782	0.00288656	0.0375163	0.883333	0.383333	0.84	0.54	1.27	0.28	0.28	0.59
Slc4a4	-1.24989	5.56154	11.6395	0.000645649	0.0108679	9.94	4.29667	8.93	10.62	10.27	4.8	5.83	2.26
Efnb2	-1.24948	7.89311	14.4593	0.000143219	0.00322026	92.3433	40.2333	80.29	109.93	86.81	47.73	46.7	26.27
Nkx3-1	-1.24651	0.362712	7.09457	0.0077318	0.0810238	0.663333	0.28	0.96	0.38	0.65	0.09	0.5	0.25
Grb14	-1.24605	1.95087	8.73946	0.00311397	0.0398985	3.18333	1.31333	3.99	2.03	3.53	1.77	0.63	1.54
Abca2	-1.24183	3.78496	15.8052	7.02097e-05	0.00180281	2.73	1.21333	2.45	2.79	2.95	1.31	1.42	0.91
Pde3a	-1.24176	6.50784	9.13522	0.00250736	0.0335525	30.1567	12.8767	26.72	36.7	27.05	18.1	15.07	5.46
Vgll3	-1.24134	2.6761	11.494	0.00069822	0.0116147	3.11	1.34	2.67	2.95	3.71	0.96	1.12	1.94
Fgfr1	-1.23638	7.03591	16.5086	4.84297e-05	0.00132128	43.6333	19.17	39.08	47.05	44.77	20.71	22.08	14.72
Actn1	-1.23476	6.36298	17.2388	3.29632e-05	0.000965929	34.4933	15.1367	32.8	31.24	39.44	16.77	14.17	14.47
Asb2	-1.23274	2.70443	6.37054	0.011603	0.109288	3.81333	1.62333	4.14	1.65	5.65	0.94	1.06	2.87
Smad7	-1.2321	5.95028	15.0497	0.000104718	0.00248244	22.4667	9.81333	18.13	20.35	28.92	10.37	9.03	10.04
Epha3	-1.23053	2.72169	11.9858	0.00053608	0.00932654	2.44333	1.05667	3.16	2.2	1.97	1.04	1.45	0.68
Plcl1	-1.23009	0.856747	9.72049	0.00182225	0.0256595	0.44	0.193333	0.45	0.32	0.55	0.25	0.24	0.09
Itga9	-1.22981	7.99764	14.029	0.000180015	0.00384006	58.1167	25.6433	47.9	62.44	64.01	24.11	34.59	18.23
Gna15	-1.22978	2.33452	13.2443	0.000273414	0.00553784	4.29333	1.84	4.04	4.4	4.44	1.51	1.56	2.45
Pde5a	-1.22391	2.09862	10.3643	0.00128478	0.0192247	1	0.42	1.49	0.69	0.82	0.54	0.44	0.28
Loxl1	-1.22088	4.17851	9.34409	0.00223706	0.0304505	9.01667	3.81	10.42	5.09	11.54	3.38	2.52	5.53
Enah	-1.21721	1.63592	9.69669	0.001846	0.0258788	1.15333	0.493333	1.47	0.7	1.29	0.68	0.49	0.31
Matn2	-1.21603	3.05685	11.526	0.000686295	0.0114464	3.69	1.58667	4.24	2.61	4.22	1.63	1	2.13
Itgbl1	-1.21596	8.11968	15.2788	9.27539e-05	0.00225802	194.7	86.67	191.36	181.71	211.03	112.04	70.51	77.46
Mfap4	-1.21152	5.2939	10.2347	0.00137826	0.0204104	46.77	20.7133	52.67	24.53	63.11	19.72	18.03	24.39
Plekhg3	-1.21132	3.62686	13.3657	0.000256264	0.00525778	3.74667	1.69	3.7	3.1	4.44	1.75	2.18	1.14
4930572J05Rik	-1.20574	1.25879	10.7316	0.00105324	0.0163594	2.88	1.18667	3.05	2.74	2.85	0.73	1.04	1.79
Meis1	-1.20328	3.92175	10.8557	0.000984929	0.0154885	6.93667	3.13667	7.07	7.65	6.09	4.08	3.71	1.62
AW555464	-1.20266	3.13862	14.0904	0.000174232	0.00375103	2.06	0.933333	1.7	1.85	2.63	1	0.94	0.86
Dtx4	-1.201	0.656686	10.6487	0.00110146	0.0169834	0.426667	0.17	0.36	0.32	0.6	0.19	0.15	0.17
Unc5b	-1.20066	3.14661	7.00352	0.00813495	0.0845487	2.34333	1.06333	1.76	1.54	3.73	0.82	0.61	1.76
Prss35	-1.19877	0.900666	6.05114	0.0138973	0.122341	1.24	0.556667	1.44	1.21	1.07	1	0.14	0.53
Csdc2	-1.19606	2.81299	6.93307	0.00846164	0.0869024	4.89	2.13667	4.93	3.68	6.06	1.51	1.01	3.89
Stbd1	-1.19553	6.27346	8.29737	0.00397026	0.0483542	69.9533	31.49	66.05	39.67	104.14	29.04	20.95	44.48
Lox	-1.19417	8.58187	13.5517	0.000232086	0.00481635	167.82	75.6667	160.27	182.32	160.87	99.09	77.44	50.47
Fam46b	-1.18979	1.39816	7.37314	0.00662053	0.0727511	2.00667	0.85	1.69	0.92	3.41	0.86	0.93	0.76
Cdh6	-1.18729	0.649749	5.8477	0.0155974	0.133591	0.866667	0.4	0.84	0.57	1.19	0.6	0.48	0.12
Furin	-1.17968	5.16204	9.30722	0.00228252	0.031036	13.6767	6.02	8.15	11	21.88	5.7	7.55	4.81
Thbs2	-1.17963	3.53693	11.5867	0.000664265	0.0111082	3.19333	1.43	3.32	3.26	3	2.1	1.23	0.96
Ranbp17	-1.17902	2.82356	8.41694	0.0037174	0.0460456	2.08667	0.886667	2.28	2.45	1.53	0.8	1.51	0.35
Ankrd57	-1.17783	1.85605	9.73455	0.00180836	0.0255207	1.31	0.593333	1.12	1.8	1.01	0.91	0.48	0.39
Scarf2	-1.17598	4.42743	8.64466	0.00328021	0.0415242	10.14	4.62667	8.1	6.18	16.14	3.53	4.34	6.01
St5	-1.17513	4.75716	12.0823	0.00050904	0.0089375	12.6	5.55667	15.89	7.67	14.24	6.31	3.97	6.39
Rgs5	-1.17466	5.525	7.48345	0.00622686	0.0692669	43.17	19.6933	53.08	21.29	55.14	25.42	10.43	23.23
Gsta4	-1.17285	2.73591	10.5491	0.00116244	0.017708	14.0367	6.28333	18.25	14.61	9.25	8.87	4.71	5.27
Fn1	-1.17133	9.39166	12.6539	0.000374776	0.00697689	125.25	58.4233	106.31	130.23	139.21	72.95	63.7	38.62
Sema3f	-1.17054	7.99929	12.6288	0.000379851	0.00706099	122.373	55.3333	92.54	111.04	163.54	49.3	57.21	59.49
Rapsn	-1.17014	0.313434	5.22635	0.0222471	0.17246	1.24	0.556667	1.1	0.92	1.7	0.02	0.63	1.02
Prex1	-1.16913	3.68549	10.7204	0.00105962	0.0164383	3.06667	1.39	2.38	2.96	3.86	1.72	1.6	0.85
Slc25a34	-1.16854	1.04482	3.98543	0.0458953	0.278848	1.25667	0.5	1.2	0.62	1.95	0.82	0.03	0.65
Dzip1l	-1.16804	1.96156	8.70738	0.00316924	0.0404838	1.40333	0.576667	1.21	1.39	1.61	0.92	0.41	0.4
Pygm	-1.16784	2.70509	10.0407	0.00153123	0.0222547	3.77667	1.58667	4.16	2.02	5.15	1.64	1.65	1.47
Vasn	-1.16726	4.32363	13.4241	0.000248413	0.00512995	10.4533	4.75667	11.26	7.68	12.42	5.42	4.47	4.38
Emilin2	-1.16524	0.842498	10.0072	0.00155928	0.0226287	0.716667	0.326667	0.62	0.5	1.03	0.38	0.24	0.36
Cpxm1	-1.16345	4.11321	14.3396	0.000152617	0.00337758	11.82	5.48333	13.55	12.75	9.16	5.86	5.02	5.57
Ptch1	-1.16329	2.69177	6.5465	0.0105091	0.101708	1.97667	0.83	1.66	2.67	1.6	1.3	1.06	0.13
Sfrp4	-1.16208	4.48487	10.6238	0.00111639	0.0171509	22.4233	10.19	22.04	21.7	23.53	9.61	6.12	14.84
Col23a1	-1.15579	6.34013	10.9583	0.000931864	0.0148758	21.9467	10.1	15.22	19.35	31.27	8.67	10.85	10.78
Tnc	-1.1556	3.63228	9.97015	0.00159099	0.0229389	2.75	1.19667	3.26	1.46	3.53	1.09	1.08	1.42
Fbln7	-1.15291	2.73882	10.0484	0.00152483	0.0221872	3.75333	1.71333	4.53	2.51	4.22	2.18	1.16	1.8
Paqr8	-1.15193	4.01866	6.34792	0.0117519	0.110361	5.81667	2.74	5.87	6.47	5.11	4.36	3.06	0.8
Flrt1	-1.1507	1.11961	11.726	0.000616327	0.0104935	0.403333	0.16	0.42	0.31	0.48	0.2	0.19	0.09
Sik1	-1.15012	3.90564	11.4475	0.000715905	0.0118621	4.7	2.05667	3.65	4.55	5.9	2.72	2.11	1.34
Adrbk1	-1.14847	5.19541	10.8143	0.00100717	0.015721	17.4467	8.17667	13.03	13.97	25.34	6.71	9.18	8.64
Hdac9	-1.1474	2.38785	11.6644	0.000637063	0.0107681	1.84333	0.823333	2.22	1.69	1.62	1.11	0.7	0.66
Cercam	-1.14714	4.15698	12.7894	0.000348585	0.00668596	10.6867	4.98	10.9	10.18	10.98	6.61	4.86	3.47
Atp1a2	-1.14486	2.65703	8.15991	0.00428265	0.0514365	1.6	0.716667	1.65	0.96	2.19	0.77	0.42	0.96
Lrrc17	-1.14467	3.01987	7.34612	0.00672077	0.0735335	6.34333	2.86667	9.43	3.71	5.89	2.23	1.88	4.49
Chpf	-1.14433	3.37185	6.0697	0.013752	0.121598	5.42333	2.50667	5.87	3.26	7.14	1.54	1.43	4.55
BC024582	-1.14336	0.356559	4.12299	0.0423043	0.26564	0.0466667	0.00666667	0.05	0.09	0	0	0.02	0
Khsrp	-1.143	4.359	7.25237	0.00708075	0.076594	7.94333	3.72333	8.16	7.87	7.8	4.33	5.55	1.29
Rgma	-1.14274	2.23187	10.261	0.00135874	0.0201882	2.00667	0.823333	1.87	1.93	2.22	1.15	0.85	0.47
Smad6	-1.13997	7.2923	10.2927	0.00133556	0.0199374	86.0467	40.1067	74.32	68.84	114.98	28.33	40.66	51.33
Cacna2d1	-1.1374	1.94057	7.72661	0.00544129	0.0622258	0.773333	0.36	1.02	0.45	0.85	0.4	0.52	0.16
Cldn15	-1.13729	6.89721	14.1525	0.000168574	0.0036416	113.533	53.1567	114.41	109.18	117.01	53.32	43.99	62.16
Casc4	-1.13682	3.39838	10.2644	0.00135624	0.0201747	4.22333	2.02333	5.31	3.95	3.41	2.7	2.24	1.13
Cfi	-1.13512	0.59909	6.17899	0.0129276	0.11681	1.07	0.493333	0.96	1.21	1.04	0.59	0.75	0.14
Dusp8	-1.13269	5.05936	9.87382	0.00167647	0.0239532	11.02	5.28	8.47	8.21	16.38	5.07	4.81	5.96
Flna	-1.13204	8.65535	10.0639	0.001512	0.0220512	76.0967	36.0033	80.32	73.55	74.42	50.58	38.34	19.09
C78339	-1.13195	3.2473	13.476	0.000241635	0.00499813	9.57333	4.72333	8.1	10.85	9.77	4.56	5.47	4.14
Sec14l2	-1.13097	4.25888	14.1044	0.000172936	0.00372947	11.9667	5.6	11.42	12.6	11.88	6.85	5.17	4.78
Gna14	-1.13015	3.69928	14.4129	0.000146797	0.00329486	6.11667	2.83667	5.48	6.29	6.58	3.06	2.95	2.5
Leprel2	-1.12932	7.54573	13.1363	0.000289628	0.0057467	110.757	51.93	99.16	102.21	130.9	42.18	62.45	51.16
Mast3	-1.12751	2.79133	12.8936	0.000329701	0.00635264	1.96333	0.96	1.86	1.93	2.1	1.2	0.8	0.88
Kank4	-1.12613	2.11679	7.99436	0.00469233	0.0555143	1.45667	0.66	1.51	0.93	1.93	0.78	0.86	0.34
Fbrsl1	-1.12399	4.06075	11.9734	0.000539642	0.00936069	5.56667	2.61333	4.92	4.75	7.03	2.1	2.65	3.09
Gm347	-1.12361	0.970004	9.19641	0.0024249	0.0326215	0.56	0.253333	0.61	0.59	0.48	0.39	0.19	0.18
Mtus2	-1.12191	2.86117	5.88443	0.0152754	0.131366	1.40333	0.63	1.8	0.7	1.71	0.77	0.26	0.86
Reck	-1.11918	7.49985	8.77981	0.00304583	0.0391443	68.0533	32.6533	70.15	73.5	60.51	44.04	38.73	15.19
Sgcg	-1.11898	4.00527	5.41432	0.0199722	0.160325	7.46333	3.50667	10.6	3.34	8.45	3.07	1.68	5.77
Gm17296	-1.11841	1.833	6.55221	0.0104754	0.101616	0.89	0.313333	1.01	1.04	0.62	0.51	0.38	0.05
Plxnb1	-1.11759	0.626638	7.27939	0.00697502	0.0759216	0.213333	0.09	0.28	0.25	0.11	0.03	0.11	0.13
Fam40b	-1.11563	1.82457	5.91386	0.0150222	0.129556	1	0.473333	0.71	1.69	0.6	0.64	0.57	0.21
Trpc1	-1.11554	2.47513	8.97394	0.00273858	0.0359623	2.43667	1.06667	2.59	2.68	2.04	1.09	1.53	0.58
Cerk	-1.11467	5.12545	13.2486	0.000272777	0.00553728	12.21	5.72333	10.35	11.26	15.02	6.15	6.03	4.99
Zfp651	-1.11133	3.10472	12.4033	0.00042858	0.00778393	2.07	1.00667	1.96	1.67	2.58	1.15	0.93	0.94
Hs3st3b1	-1.11004	1.21631	11.3026	0.000773995	0.0126753	0.586667	0.273333	0.66	0.55	0.55	0.35	0.26	0.21
Loxl4	-1.10846	3.96286	8.47055	0.00360942	0.044907	4.53333	2.14333	3.13	4	6.47	3.19	1.87	1.37
Tbkbp1	-1.10786	4.71801	13.499	0.00023869	0.0049453	11.6267	5.45	10.44	10.66	13.78	5.48	5.61	5.26
Clec11a	-1.10398	2.68989	6.45588	0.0110586	0.105653	5.57333	2.62333	5.86	4.12	6.74	3.13	1.02	3.72
Fmo3	-1.10318	4.07684	6.00312	0.0142806	0.124674	13.6467	6.18333	11.29	9.82	19.83	3.82	3.61	11.12
Sulf2	-1.10153	8.88161	12.0502	0.00051787	0.00906192	162.917	78.4567	145.79	184.41	158.55	81.19	99.53	54.65
Mir1906-1	-1.10009	2.71208	13.1239	0.000291547	0.0057577	17.9	17.8067	24.27	25.28	4.15	18.29	19.34	15.79
Mir1906-2	-1.10009	2.71208	13.1239	0.000291547	0.0057577	17.9	17.8067	24.27	25.28	4.15	18.29	19.34	15.79
Slc16a3	-1.09816	3.35888	12.2528	0.000464564	0.00830638	6.56	3.12333	5.36	6.35	7.97	2.74	2.92	3.71
Efs	-1.09811	0.678619	7.90712	0.00492405	0.0576628	0.676667	0.33	0.86	0.5	0.67	0.3	0.2	0.49
Lrig3	-1.09553	4.03211	8.92344	0.00281533	0.0367415	6.4	3.07667	4.69	7.74	6.77	3.48	4.09	1.66
Axl	-1.09476	5.60291	12.71	0.000363699	0.00681226	15.2533	7.39667	17.46	11.41	16.89	7.96	7.24	6.99
Wdr81	-1.09398	3.13165	9.26765	0.00233236	0.0315105	1.93	0.936667	1.59	1.98	2.22	1.41	0.58	0.82
Vav2	-1.09351	2.53614	8.0479	0.00455565	0.0542142	2.49	1.11667	2.25	2.42	2.8	0.99	1.77	0.59
Cys1	-1.09272	2.45488	12.5148	0.000403742	0.00740036	2.25	1.01333	2.24	2.51	2	0.96	0.96	1.12
AA986860	-1.09126	2.53385	10.3136	0.00132057	0.0197368	2.62333	0.983333	2.54	3.02	2.31	1.34	0.85	0.76
Ass1	-1.0843	6.23989	13.8191	0.000201281	0.00425379	77.8133	37.5033	80.25	81.17	72.02	42.71	36.22	33.58
Perp	-1.08327	7.32493	12.5256	0.000401413	0.00737516	149.29	72.53	172.76	161.27	113.84	80.64	64.04	72.91
Efna5	-1.08133	7.42334	9.30293	0.00228788	0.0310754	51.86	25.13	41.83	42.29	71.46	28.92	17.73	28.74
Sirpa	-1.08037	6.63601	12.4614	0.000415451	0.00757809	43.8867	21.79	37.82	41.02	52.82	24.35	22.44	18.58
Ust	-1.07916	0.969314	6.77104	0.00926488	0.093528	0.703333	0.31	0.95	0.51	0.65	0.46	0.22	0.25
Synpo	-1.07736	7.92336	12.2899	0.000455414	0.00817742	76.4733	37.46	62.05	75.6	91.77	38.49	41.92	31.97
Mylk4	-1.07733	1.79294	4.44895	0.0349227	0.234032	0.833333	0.38	1.25	0.48	0.77	0.66	0.11	0.37
Mical2	-1.07609	7.13171	9.55147	0.0019979	0.0276448	32.27	15.65	33.88	33.53	29.4	21.78	16.46	8.71
Fbln1	-1.07605	3.76425	13.0703	0.000300018	0.00588826	6.17667	2.99333	6.3	5.81	6.42	3.47	2.79	2.72
Atp1b2	-1.07421	1.79905	7.81951	0.00516853	0.0596975	1.79667	0.866667	2.15	0.9	2.34	1.03	0.76	0.81
Osbpl10	-1.07374	1.98978	10.5106	0.00118691	0.0179727	2.86	1.23333	2.29	2.42	3.87	1.06	1.11	1.53
Tmtc1	-1.07353	7.20104	11.5105	0.000692028	0.0115268	27.5933	13.55	24.64	32.2	25.94	14.45	16.5	9.7
Ptprs	-1.07349	4.17266	12.1515	0.000490482	0.00867181	3.95667	1.86	3.85	3.79	4.23	1.98	1.42	2.18
Ndst1	-1.07257	4.76646	10.4438	0.00123062	0.0185458	6.71667	3.31333	6.4	7.38	6.37	4.3	3.51	2.13
F2rl3	-1.07203	0.570294	8.85373	0.00292491	0.0379369	1.39333	0.666667	1.37	1.12	1.69	0.78	0.78	0.44
Dock8	-1.07142	2.55568	7.62615	0.00575279	0.0649061	1.07667	0.483333	1.14	0.89	1.2	0.54	0.69	0.22
Ssh3	-1.07134	1.68258	10.8306	0.000998384	0.0156611	1.78	0.726667	1.66	1.74	1.94	0.86	0.52	0.8
Mmp23	-1.07103	3.12709	7.66839	0.00561964	0.0638018	9.55667	4.69667	10.66	6.55	11.46	4.11	2.98	7
Vegfa	-1.06902	7.08456	11.681	0.000631413	0.0107199	65.7967	32.6867	74.24	67.92	55.23	41.54	32.77	23.75
Plxna4	-1.06674	6.22912	9.14133	0.00249899	0.0334759	9.03333	4.37	7.55	8.15	11.4	4.94	5.71	2.46
Pkd1	-1.06673	7.9347	9.58063	0.00196641	0.0273246	25.9	12.5033	23.52	22.06	32.12	14.16	16.04	7.31
Srpx2	-1.06614	3.43963	7.35932	0.00667161	0.073122	5.89	2.95667	4.49	5.89	7.29	2.75	1.69	4.43
Dupd1	-1.06161	0.322793	7.78499	0.0052682	0.0607378	1.70333	0.84	2.11	1.75	1.25	1.31	0.6	0.61
Anks6	-1.06084	1.28822	6.85421	0.00884325	0.0900617	0.866667	0.456667	0.78	0.75	1.07	0.74	0.42	0.21
Epdr1	-1.06054	7.10199	10.0812	0.0014979	0.0219213	98.2867	48.22	88.7	93.27	112.89	37.69	41.71	65.26
Slc2a13	-1.06021	2.10936	7.36637	0.00664551	0.0729623	1.03667	0.513333	1.13	1.26	0.72	0.63	0.68	0.23
Gas1	-1.05978	2.96115	7.91207	0.0049106	0.0575986	3.87667	1.86667	4.01	3.07	4.55	1.41	1.35	2.84
Aatk	-1.05635	3.19841	6.87247	0.00875338	0.0892182	2.58667	1.29667	1.82	2.32	3.62	1.18	0.77	1.94
Amigo1	-1.0531	3.66678	10.2443	0.00137109	0.0203477	3.94667	1.95667	3.19	4.18	4.47	2.2	2.36	1.31
Sorcs2	-1.05158	0.594622	7.47498	0.00625622	0.0695324	0.366667	0.173333	0.28	0.43	0.39	0.12	0.15	0.25
Fibin	-1.05073	3.38695	9.28957	0.00230462	0.0312692	8.27667	4.12667	9.94	5.85	9.04	4.46	3.04	4.88
Atp10a	-1.04987	4.97525	7.12985	0.0075811	0.0799077	8.97667	4.47	8.48	10.55	7.9	5.44	6.06	1.91
Gm2058	-1.04966	7.09354	12.3408	0.000443168	0.00799154	14.9867	4.15	14.13	20.05	10.78	3.97	3.42	5.06
Selenbp2	-1.04729	4.40792	12.7185	0.000362054	0.00681016	0.08	0.0266667	0.09	0.06	0.09	0.03	0.03	0.02
Tub	-1.04703	1.5814	8.18758	0.00421781	0.0508024	0.626667	0.29	0.89	0.42	0.57	0.38	0.31	0.18
Psma8	-1.04599	2.32724	11.856	0.000574769	0.00985908	4.42667	2.30667	4.56	4.65	4.07	2.44	2.2	2.28
Pdgfra	-1.04478	2.56454	10.2848	0.00134132	0.0199998	1.38	0.686667	1.66	1.38	1.1	0.89	0.57	0.6
Ltbp4	-1.04467	11.2781	10.0778	0.00150065	0.0219361	749.863	376.313	575.01	635.73	1038.85	375.11	375.43	378.4
Arhgef17	-1.04446	3.30815	11.193	0.000821059	0.0133083	1.47	0.716667	1.67	1.31	1.43	0.84	0.7	0.61
Serpina1e	-1.04357	5.23714	8.78218	0.00304187	0.0391331	33.4367	15.0667	32.25	30.14	37.92	9.97	15.5	19.73
Gm5424	-1.04269	4.75507	12.5138	0.000403953	0.00740036	3.09	1.56333	3.39	3.14	2.74	2.1	1.13	1.46
Fgf14	-1.04041	1.81012	7.13014	0.00757987	0.0799077	1.47	0.79	1.82	1.33	1.26	1.32	0.7	0.35
Igfbp7	-1.037	8.38559	5.9907	0.0143815	0.125383	534.873	261.823	598.43	322.8	683.39	159.97	203.45	422.05
Hist2h3c2-ps	-1.03696	0.458078	7.72839	0.00543591	0.0622258	2.22667	1.03667	2.23	1.9	2.55	0.83	1.02	1.26
Cables1	-1.03672	5.56857	8.95181	0.00277194	0.0363627	22.66	11.3967	19.16	19.46	29.36	8	11.74	14.45
Ddr1	-1.03434	6.01484	10.0057	0.00156054	0.0226287	27.58	13.8467	23.16	22.99	36.59	17.15	11.91	12.48
Dopey2	-1.03328	5.72284	9.10969	0.00254259	0.0339164	11.8933	6.92	10.18	14.68	10.82	8.6	6.19	5.97
Hmgcs2	-1.03085	3.1595	10.4333	0.0012376	0.0186067	4.30333	2.16667	4.2	3.58	5.13	1.88	1.97	2.65
Glt8d2	-1.03013	2.76397	8.83046	0.00296244	0.0382668	5.12667	2.49667	5.52	5.8	4.06	2.27	1.89	3.33
Npcd	-1.02846	4.2404	10.1268	0.00146126	0.021489	3.77333	1.54667	3.3	3.57	4.45	2.07	1.24	1.33
Cap2	-1.0282	2.09616	4.53559	0.0331971	0.226354	1.80667	0.896667	1.71	1.33	2.38	0.96	0.23	1.5
Postn	-1.02792	7.16998	7.02139	0.00805417	0.0838468	74.87	37.6933	102.62	36.44	85.55	39.2	30.95	42.93
Sgca	-1.02671	1.10899	8.65371	0.00326396	0.0414012	2.33667	1.10333	2.82	1.59	2.6	0.99	1.04	1.28
Kif7	-1.02635	0.890488	8.18109	0.00423294	0.0509361	0.54	0.253333	0.44	0.59	0.59	0.33	0.24	0.19
Scamp5	-1.02558	1.67017	8.94539	0.0027817	0.036453	1.53	0.736667	1.55	1.61	1.43	0.58	1.03	0.6
Khdrbs3	-1.02466	1.94273	7.8675	0.00503312	0.0587229	3.26667	1.65667	4.59	2.54	2.67	1.55	1.17	2.25
Akap5	-1.02322	0.892851	8.8466	0.00293635	0.0380463	0.293333	0.163333	0.26	0.34	0.28	0.22	0.12	0.15
Col5a1	-1.02273	6.4715	9.03492	0.00264871	0.0350366	15.0533	7.64667	13.58	11.86	19.72	10.31	6.77	5.86
Eya1	-1.02249	3.83689	5.68067	0.0171528	0.143609	4.77667	2.30667	5.83	6.2	2.3	2.98	2.69	1.25
Pkp2	-1.01973	4.07351	8.053	0.00454284	0.0541626	9.32333	4.71	8.47	11.19	8.31	6.12	5.39	2.62
Fstl1	-1.0194	10.1997	11.3812	0.000741915	0.0122186	525.83	267.98	461.95	479.96	635.58	295.94	254.03	253.97
Rnpepl1	-1.01917	6.76006	9.60079	0.00194493	0.027056	55.8067	28.73	47.5	50.94	68.98	21.85	37.68	26.66
Ttyh3	-1.01888	3.40102	10.9312	0.000945607	0.0150005	3.37333	1.69667	2.89	3.17	4.06	1.98	1.65	1.46
Entpd2	-1.01838	2.67205	10.6214	0.00111786	0.0171527	5.54667	2.64333	7.15	4.51	4.98	2.65	2.79	2.49
S1pr3	-1.01807	2.22662	4.29768	0.0381644	0.247502	1.68333	0.833333	1.78	0.81	2.46	0.28	1.4	0.82
Adam33	-1.01651	3.18637	7.20324	0.00727722	0.0777739	3.43333	1.74667	2.65	2.9	4.75	1.6	1.07	2.57
Pde6h	-1.01592	1.43619	10.4006	0.00125978	0.0188728	9.67	4.29667	10.07	9.18	9.76	4.6	3.91	4.38
Selenbp1	-1.01422	6.18712	12.195	0.000479165	0.00850736	60.8533	30.79	63.68	64.67	54.21	32.94	32.6	26.83
Tubb4	-1.01414	1.28831	6.26348	0.0123252	0.113555	1.72	0.783333	2.24	1.03	1.89	0.58	0.57	1.2
Spn	-1.01315	1.70019	10.7436	0.00104641	0.0162734	1.77	0.966667	1.92	1.64	1.75	1.02	0.92	0.96
Rtn2	-1.01294	1.34503	9.88955	0.0016622	0.0237761	3.27333	1.33333	3.74	2.7	3.38	1.55	1.18	1.27
Sned1	-1.01132	4.62985	8.91881	0.00282249	0.036797	7.34333	3.66333	4.88	6.66	10.49	3.39	3.49	4.11
Irgq	-1.0094	2.87398	10.671	0.0010883	0.016806	1.87333	0.96	1.65	1.82	2.15	1.07	1.08	0.73
Mir1901	-1.00909	0.976398	7.7375	0.00540856	0.0620734	2.24	0	0	6.72	0	0	0	0
Ahcyl2	-1.00871	4.77643	6.29939	0.012078	0.112299	8.56667	4.37667	7.82	10.86	7.02	6.18	5.16	1.79
Atl2	-1.00846	8.63338	9.08234	0.0025809	0.0342829	179.117	92.0033	188.8	211.23	137.32	120.44	93.66	61.91
Dio2	-1.00799	1.11327	6.0175	0.0141647	0.124062	0.583333	0.3	0.72	0.53	0.5	0.43	0.36	0.11
Fzd8	-1.00733	4.04218	9.75286	0.00179044	0.0253242	7.26	3.85	6.68	6.83	8.27	2.78	4.54	4.23
Ccdc85a	-1.00704	0.456452	6.22261	0.0126129	0.115117	0.416667	0.27	0.45	0.29	0.51	0.44	0.13	0.24
Ttc28	-1.00576	5.97131	9.90593	0.00164747	0.0236456	8.32667	4.25667	7.63	7.95	9.4	5.75	3.9	3.12
Meg3	-1.00504	5.43212	11.3246	0.000764855	0.0125418	21.32	11.5	20	24.05	19.91	10.19	11.12	13.19
Fam107a	-1.00356	6.1429	7.28343	0.00695937	0.0758164	35.4267	18.22	28.54	22.69	55.05	20.52	15.38	18.76
Glb1l2	-1.00353	1.18428	4.33119	0.0374202	0.24428	0.886667	0.333333	1.16	0.69	0.81	0.44	0.42	0.14
Rnf144a	-1.00326	4.91131	8.46961	0.00361129	0.044907	9.12	4.66667	8.09	9.17	10.1	6.36	2.83	4.81
Arhgef25	-1.00267	3.90233	10.8242	0.00100182	0.0156762	9.74333	4.94	10.33	7.54	11.36	4.62	5.52	4.68
Pnpla3	-1.00182	1.18549	5.47863	0.0192503	0.156112	0.663333	0.316667	0.88	0.74	0.37	0.51	0.15	0.29
Lrrc68	-1.00114	4.69543	7.22006	0.00720932	0.0773829	12.6133	6.54333	7.79	12.41	17.64	6.93	4.81	7.89
Eya2	-1.00049	2.33295	7.5646	0.00595257	0.0666256	3.06	1.54667	3.28	3.26	2.64	1.84	2.07	0.73
Ube2o	-0.998426	3.26292	8.22306	0.00413613	0.0500088	2.79	1.45333	2.33	2.53	3.51	1.33	2.09	0.94
Stard10	-0.997616	3.52495	9.34774	0.0022326	0.0304225	16.56	8.33667	16.63	15.82	17.23	7.4	6.64	10.97
Fam46a	-0.997191	3.53918	11.1565	0.000837394	0.0135557	3.32667	1.70667	3.48	3.03	3.47	1.62	1.57	1.93
Hyou1	-0.995733	4.33697	4.62706	0.0314714	0.21818	6.95667	3.56	7.6	6.75	6.52	5.51	4.17	1
Zfp423	-0.994759	5.693	10.4034	0.00125784	0.0188661	16.3833	8.52667	15.1	17.11	16.94	10.6	8.54	6.44
Pgr	-0.993383	0.732873	6.25339	0.0123956	0.113997	0.35	0.176667	0.37	0.24	0.44	0.2	0.09	0.24
Sox5	-0.992788	2.88964	9.77637	0.00176769	0.0250584	1.3	0.68	1.18	1.27	1.45	0.87	0.66	0.51
Plod2	-0.98915	4.53636	6.79628	0.00913479	0.0924359	9.79333	4.99667	12.79	8.75	7.84	7	5.5	2.49
Rab38	-0.987506	1.56652	8.16002	0.00428239	0.0514365	3.23	1.59667	3.71	3.48	2.5	1.71	1.95	1.13
Cnn1	-0.987208	6.88798	3.87376	0.0490466	0.291357	98.47	50.0767	123.56	46.28	125.57	36.62	23.07	90.54
Cachd1	-0.984288	4.38352	5.00731	0.0252405	0.188285	6.24333	3.18	5.29	7.54	5.9	2.93	5.56	1.05
Timp2	-0.983886	10.8929	9.21142	0.00240511	0.0324353	842.127	442.55	774.15	877.76	874.47	387.08	616.41	324.16
Stk35	-0.983033	3.86981	4.93312	0.0263468	0.194135	3.67333	1.89333	3.84	3.79	3.39	2.65	2.53	0.5
Islr	-0.982379	4.05536	8.28737	0.00399218	0.0485465	12.7867	6.72667	13.92	8.55	15.89	6.02	6.03	8.13
Chsy3	-0.98218	0.660324	5.14441	0.0233214	0.178492	0.613333	0.326667	0.65	0.29	0.9	0.39	0.22	0.37
Gnptab	-0.981313	5.2289	6.50476	0.0107586	0.103621	11.0633	5.80667	10.68	13.19	9.32	7.29	7.48	2.65
Ereg	-0.981048	3.731	7.55799	0.00597446	0.0668116	4.90333	2.53	3.76	5.07	5.88	3.56	2.49	1.54
Ube2h	-0.979241	7.09498	10.6288	0.0011134	0.0171466	40.4333	23.1433	36.18	42.9	42.22	28.14	24.8	16.49
Fstl3	-0.97878	3.77092	6.10474	0.013482	0.120359	11.3967	5.76333	11.76	6.06	16.37	5.52	4.29	7.48
Trp53inp2	-0.978747	4.78387	7.85697	0.00506251	0.058875	11.05	5.83	10.89	9.3	12.96	7.83	6.29	3.37
Crim1	-0.976991	7.50723	6.90236	0.00860821	0.0880932	46.1	23.9067	32.03	34.65	71.62	23.8	29.32	18.6
Sync	-0.97579	2.63947	7.1806	0.00736961	0.0783307	2.63	1.21333	2.84	1.15	3.9	1.25	1.16	1.23
Ltbp3	-0.974811	7.85306	9.1242	0.0025225	0.0337195	62.96	30.3567	50.51	50.72	87.65	28.03	33.39	29.65
Prdm9	-0.973579	1.92754	6.61921	0.0100885	0.0994557	0.81	0.406667	0.8	0.75	0.88	0.43	0.3	0.49
H6pd	-0.970293	4.50128	8.83453	0.00295585	0.0382207	7.52	3.98667	6.12	7.3	9.14	3.06	4.2	4.7
Nav2	-0.970186	2.60031	7.35958	0.00667065	0.073122	0.626667	0.303333	0.73	0.62	0.53	0.45	0.29	0.17
Zfp354c	-0.96932	3.3484	6.54653	0.0105089	0.101708	2.97667	1.56667	3.27	3.65	2.01	2.37	1.27	1.06
Asap2	-0.968778	6.45311	7.97689	0.00473782	0.0558957	21.2867	10.1233	22.39	21.91	19.56	12.76	12.44	5.17
Zfp518b	-0.964898	2.00703	6.60875	0.0101479	0.0998153	0.893333	0.496667	0.8	0.87	1.01	0.72	0.54	0.23
Pcx	-0.9646	2.53826	7.84793	0.0050879	0.0589814	2.1	1.15333	1.56	2.36	2.38	1.33	1.4	0.73
Speg	-0.963852	2.49055	6.66975	0.00980631	0.0977465	4.83667	1.98667	5.98	2.92	5.61	1.62	1.59	2.75
Mamld1	-0.962197	3.99092	5.65388	0.0174168	0.145531	5.87	3.13667	4.67	7.43	5.51	4.29	3.71	1.41
Ulk1	-0.960898	5.54941	8.29948	0.00396564	0.0483542	13.5433	7.27	11.62	15.24	13.77	8	9.25	4.56
Mmp28	-0.960756	3.6444	6.64272	0.00995618	0.0986964	7.01333	3.59667	7.73	4.23	9.08	4.31	4.61	1.87
Rhobtb2	-0.959694	2.5689	8.3712	0.00381214	0.0470099	1.69333	0.88	1.58	1.81	1.69	1.2	0.67	0.77
Stac	-0.95797	0.398012	3.86733	0.0492347	0.292021	0.776667	0.433333	0.67	0.51	1.15	0.36	0.15	0.79
Pacs1	-0.957066	5.75471	8.23655	0.0041055	0.049686	18.9267	10.0267	16.94	20.79	19.05	11.21	12.71	6.16
Zdhhc18	-0.95657	4.77695	5.20051	0.0225802	0.174507	14.3633	7.84333	9.84	12.35	20.9	4.73	12.72	6.08
Bicc1	-0.956388	0.956683	7.21758	0.00721931	0.0773829	0.87	0.403333	0.79	1.01	0.81	0.42	0.46	0.33
Abcg3	-0.956078	4.1162	6.08609	0.0136251	0.121038	8.91	4.82	10.69	8.77	7.27	6.49	5.85	2.12
Rbm38	-0.956015	1.70622	7.22487	0.00719003	0.0773829	2.93667	1.50667	2.8	2.22	3.79	1.18	1.34	2
BC037032	-0.954818	2.45148	7.09284	0.00773923	0.0810347	0.116667	0.0233333	0.15	0.1	0.1	0.05	0.02	0
Rgs11	-0.952559	2.28084	6.02756	0.0140842	0.123558	2.49	1.37333	2.58	2.63	2.26	2.28	1.15	0.69
Epas1	-0.951785	9.03767	8.80782	0.00299943	0.0386264	124.337	70.47	119.29	122.79	130.93	91.82	69.41	50.18
Pigg	-0.951115	4.41697	8.62948	0.00330766	0.0418025	8.26	4.29	6.25	9.29	9.24	5.15	4.67	3.05
Vipr2	-0.949076	5.11395	6.43144	0.0112118	0.106474	16.05	8.55667	17.56	20.59	10	10.42	10.44	4.81
Slc12a5	-0.94622	1.66472	8.30308	0.00395779	0.0483542	0.726667	0.37	0.86	0.75	0.57	0.44	0.29	0.38
Pfkfb3	-0.944351	6.61029	8.13895	0.00433243	0.0519358	30.41	16.1333	21.35	39.14	30.74	19.04	16.72	12.64
Ip6k3	-0.941521	5.20713	9.91273	0.0016414	0.0235851	25.8967	13.76	24.79	25.55	27.35	12.19	12.88	16.21
Cul7	-0.938678	2.9539	7.60659	0.00581554	0.0653248	2.03	1.08667	1.37	1.81	2.91	1.1	1.2	0.96
Arhgef19	-0.937344	1.30303	7.26965	0.00701295	0.0760728	0.96	0.45	0.85	0.72	1.31	0.38	0.51	0.46
Amac1	-0.936978	0.893944	4.71115	0.0299677	0.212484	1.94667	0.996667	1.9	2.41	1.53	1.76	0.47	0.76
Klf15	-0.936389	4.97123	6.06655	0.0137766	0.121617	22.3233	11.9767	17.27	21.38	28.32	6.91	12.34	16.68
Bgn	-0.936086	10.6798	8.88012	0.00288292	0.0375076	1108.41	603.233	1100.38	1048.69	1176.15	728.63	674.05	407.02
Prss57	-0.935672	3.50712	5.83209	0.0157364	0.134418	0.0133333	0.04	0	0.02	0.02	0.03	0	0.09
Synrg	-0.935264	3.98708	8.26238	0.0040475	0.0491258	5.26333	2.91667	4.77	5.61	5.41	3.25	3.59	1.91
Sympk	-0.934445	3.4569	6.04178	0.0139712	0.12282	3.91333	2.07	2.49	4.16	5.09	2.99	1.79	1.43
Ebf4	-0.934011	1.48652	7.20246	0.00728036	0.0777739	1.50667	0.8	1.24	1.57	1.71	0.48	1.16	0.76
Angpt4	-0.93396	0.906805	4.56418	0.0326473	0.223927	1.52333	0.71	1.83	0.59	2.15	0.78	0.29	1.06
Bcl9l	-0.930638	3.53806	7.3849	0.00657736	0.0724025	2.76667	1.49667	2.4	3.05	2.85	1.98	1.68	0.83
Gpr157	-0.929335	1.06858	3.99958	0.0455117	0.277387	0.623333	0.333333	0.47	0.76	0.64	0.36	0.54	0.1
Mfhas1	-0.928837	2.94011	7.76981	0.00531267	0.0611948	1.8	0.953333	1.78	1.28	2.34	1.02	1.07	0.77
Mmp2	-0.927695	8.12131	9.14727	0.0024909	0.0334028	144.407	78.3767	120.61	133.95	178.66	74.64	77.2	83.29
Scrn1	-0.926074	3.96512	9.89188	0.00166009	0.0237728	12.37	6.75667	11.03	12.38	13.7	5.84	7.28	7.15
Mpv17l	-0.926041	1.56943	6.39097	0.0114702	0.108198	1.49333	0.81	1.73	1.05	1.7	1.16	0.68	0.59
Zfp612	-0.924824	2.50918	6.5882	0.0102657	0.100495	1.74	0.973333	1.85	1.75	1.62	1.38	0.99	0.55
Adcy7	-0.924273	3.38053	9.20884	0.0024085	0.0324353	2.51333	1.26333	2.61	2.48	2.45	0.97	1.26	1.56
Rassf8	-0.922964	1.26741	6.65511	0.00988716	0.0983758	1.66667	0.966667	2.31	1.34	1.35	0.86	1.06	0.98
Echdc2	-0.9229	2.34691	9.05255	0.00262328	0.0347366	5.50667	3.01	6.33	5.54	4.65	3.26	2.79	2.98
Vil1	-0.922291	2.98096	7.4022	0.00651442	0.0718345	3.68333	1.94	3.19	3.02	4.84	2.62	1.7	1.5
Entpd5	-0.922212	5.5269	8.32776	0.00390439	0.0479395	14.3667	7.87667	13.41	17.05	12.64	9.1	9.2	5.33
Htra4	-0.919635	4.35027	8.3067	0.00394991	0.0483163	15.1967	8.13333	15.48	16.08	14.03	6.84	6.88	10.68
Slc1a4	-0.919402	3.7288	9.60853	0.00193676	0.0269993	5.32	2.87667	4.95	5.18	5.83	3.18	2.96	2.49
Cpd	-0.919128	7.76395	8.50357	0.00354451	0.0442069	36.4767	20.0167	33.41	40.21	35.81	21.32	24.98	13.75
Zfat	-0.917182	1.72968	7.13353	0.00756557	0.079877	1.07	0.61	1.01	1.27	0.93	0.72	0.76	0.35
Rhpn2	-0.917091	6.75578	7.01008	0.0081052	0.0843087	49.5433	27.18	45.83	61.45	41.35	36.45	28.66	16.43
4930471I20Rik	-0.915774	0.785601	6.59178	0.010245	0.100459	0.0166667	0	0	0.05	0	0	0	0
Frrs1	-0.91513	5.68995	9.02102	0.00266893	0.0352304	31.8167	17.32	30.67	33.18	31.6	20.81	18.3	12.85
Necab3	-0.914994	1.42768	5.27431	0.0216424	0.168805	1.85667	1.04	1.82	2.5	1.25	1.51	1.07	0.54
Fam168b	-0.914917	5.98436	7.7132	0.00548184	0.0625741	19.5333	10.6833	16.05	17.7	24.85	10.61	13.57	7.87
Glt28d2	-0.914016	3.66715	9.27755	0.0023198	0.0314078	6.91667	3.80333	6.66	6.42	7.67	3.74	3.35	4.32
Ccdc157	-0.913903	5.28761	8.34542	0.0038666	0.0475217	11.0333	5.6	8.56	11.22	13.32	6.87	5.68	4.25
Creb3l1	-0.91209	5.34063	9.83359	0.00171353	0.0243726	28.4	15.2767	27.29	27.52	30.39	15.07	17.29	13.47
Stxbp5	-0.910758	5.05866	6.4585	0.0110423	0.105577	5.20667	2.88333	5.16	6.55	3.91	3.56	3.45	1.64
Tek	-0.910738	10.5258	6.67419	0.00978188	0.0977465	496.387	274.01	496.52	598.8	393.84	346.74	320.9	154.39
Nrn1	-0.910493	0.875744	7.23424	0.00715259	0.0770593	1.86	0.986667	2	1.76	1.82	1.04	0.76	1.16
Hey2	-0.909578	7.25595	6.18216	0.0129045	0.116768	96.9133	53.46	108.41	108.3	74.03	71.92	60.99	27.47
Ephb6	-0.909509	3.87776	7.21211	0.00724134	0.0774878	5.88667	3.18667	4.59	4.96	8.11	2.55	4	3.01
Rhoq	-0.908446	5.60837	9.49134	0.00206443	0.0284371	17.14	8.54333	17.11	15.58	18.73	8.61	9.98	7.04
Ncor2	-0.905657	4.21147	7.95844	0.00478636	0.056311	2.75	1.46333	2.23	2.27	3.75	1.4	1.59	1.4
Upf1	-0.905062	5.25054	7.03671	0.00798558	0.0832012	12.3033	6.80667	11.3	12.49	13.12	7.11	9.31	4
Alcam	-0.904423	2.86305	4.72514	0.0297247	0.211106	2.18667	1.23667	2.67	1.54	2.35	2.04	1.07	0.6
Zhx2	-0.904058	3.37524	7.97841	0.00473385	0.0558957	3.62	2.01	3.21	3.74	3.91	2.49	2.16	1.38
Dennd5a	-0.904014	6.67064	7.42627	0.00642783	0.0710654	31.5533	17.4967	25.48	35.69	33.49	18.24	22.79	11.46
Lmod1	-0.903831	4.06719	4.42192	0.0354801	0.235906	6.09333	3.27333	7.66	3.21	7.41	2.96	2.02	4.84
Inppl1	-0.902904	3.18175	4.85067	0.0276354	0.200365	2.73	1.42333	1.8	2.77	3.62	2.11	1.47	0.69
Gm10035	-0.902656	1.24824	5.32146	0.0210644	0.165727	0.12	0.0766667	0.17	0.14	0.05	0.16	0.07	0
Rcor2	-0.901197	1.26812	6.36851	0.0116163	0.109332	1.45	0.873333	1.63	1.22	1.5	0.57	0.91	1.14
Sertad4	-0.901078	6.12532	9.72618	0.00181662	0.0256086	35.9533	19.7833	35.22	39.08	33.56	19.04	21.67	18.64
Emp2	-0.900404	9.13744	7.35089	0.00670296	0.073402	257.29	142.957	256.18	270.48	245.21	186.7	156.33	85.84
Dpt	-0.900105	2.81916	8.05899	0.00452785	0.0540736	6.76667	3.75	8.55	6.52	5.23	3.84	3.65	3.76
BC046404	-0.899169	2.9803	5.18011	0.0228468	0.175816	6.46667	3.50333	7.04	5	7.36	1.98	3.06	5.47
Txnrd3	-0.898754	5.83148	8.68311	0.00321172	0.0409026	31.1133	17.0833	31.24	31.75	30.35	21.65	16.74	12.86
Coro2b	-0.898685	2.85031	6.59238	0.0102416	0.100459	2.57667	1.08667	2.03	2.16	3.54	0.73	1.12	1.41
Man1b1	-0.897999	5.90096	9.1003	0.00255567	0.0340192	24.72	13.4333	22.66	24.76	26.74	15.42	14.18	10.7
Lonrf3	-0.894553	2.94518	4.74739	0.0293428	0.208941	1.50667	0.88	1.52	1.67	1.33	1.55	0.66	0.43
Sun2	-0.894395	3.09809	6.52922	0.0106117	0.102466	3.15333	1.66333	2.48	2.27	4.71	1.95	1.57	1.47
Rgs7	-0.892667	1.11679	4.3815	0.036331	0.239664	1.34667	0.766667	2.12	0.65	1.27	0.48	0.69	1.13
Mir1902	-0.891931	1.85548	4.01282	0.0451556	0.276014	4.28667	0	12.86	0	0	0	0	0
Lynx1	-0.891872	5.26623	8.52605	0.00350098	0.0439196	14.8867	8.14	12.37	15.42	16.87	9.63	7.05	7.74
Tuft1	-0.890795	1.48652	5.2335	0.0221559	0.171858	1.58667	0.973333	1.02	1.31	2.43	0.86	1.4	0.66
Foxc2	-0.890358	6.27844	6.69919	0.00964569	0.096755	45.1233	24.7833	45.82	33.34	56.21	19.9	22.16	32.29
Ntrk3	-0.886211	1.94689	6.27463	0.0122478	0.113089	1.60333	0.876667	2	1.17	1.64	0.72	0.7	1.21
Htra1	-0.885941	9.30143	7.27318	0.00699918	0.0760317	499.37	275.09	500.75	449.79	547.57	202.49	267.17	355.61
Fbln2	-0.88535	10.8108	8.01731	0.00463322	0.0549691	617.027	347.997	507.02	633.01	711.05	364.92	416.59	262.48
Me1	-0.885347	6.35025	8.19126	0.00420926	0.0507477	40.0167	22.26	43.03	43.15	33.87	25.61	25.11	16.06
Cmklr1	-0.884944	4.44275	4.73501	0.0295546	0.210069	10.4133	5.81333	13.51	8.51	9.22	9.54	4.85	3.05
2310057J16Rik	-0.882811	4.49662	6.65457	0.00989017	0.0983758	7.59	4.15333	6.98	7.67	8.12	4.16	5.88	2.42
Dact1	-0.882356	1.21709	5.44316	0.0196451	0.1584	0.963333	0.533333	0.62	0.97	1.3	0.3	0.66	0.64
Pid1	-0.881826	3.88294	6.99061	0.00819384	0.0850909	8.89	4.85333	11.83	9.13	5.71	5.15	5.17	4.24
Galnt10	-0.881741	5.80543	6.61999	0.0100841	0.0994557	18.1033	10.07	12.13	17.94	24.24	8.61	10.34	11.26
Rab43	-0.881597	4.71614	8.82404	0.00297288	0.0383626	8.8	4.82	7.69	8.72	9.99	4.72	5.05	4.69
Napepld	-0.881194	4.3691	9.05974	0.00261299	0.0346365	8.36333	4.68667	8.94	8.79	7.36	4.79	5.13	4.14
Rab39b	-0.880607	0.967403	5.51711	0.0188313	0.153698	0.856667	0.446667	0.5	1.22	0.85	0.5	0.5	0.34
Csnk1g2	-0.879284	6.15408	7.10825	0.00767302	0.080675	49.0567	27.2633	39.46	48.58	59.13	20.03	35.12	26.64
8430419L09Rik	-0.879166	3.70225	4.6509	0.0310373	0.216594	4.75667	2.64667	5.13	4.97	4.17	3.85	3.09	1
Abcb9	-0.878734	2.89793	8.51867	0.00351521	0.0439279	3.13	1.66667	3	2.71	3.68	1.63	1.77	1.6
Dsp	-0.877984	1.91395	5.77863	0.0162222	0.137639	0.563333	0.303333	0.61	0.34	0.74	0.37	0.22	0.32
Ank1	-0.876223	0.834761	6.45256	0.0110793	0.105691	0.163333	0.0866667	0.2	0.18	0.11	0.1	0.09	0.07
Pam	-0.872666	9.39096	7.43903	0.00638244	0.0706252	242.203	136.273	204.88	222.42	299.31	119.99	121.47	167.36
Fasn	-0.871805	4.39706	5.03505	0.0248393	0.186545	3.08667	1.73333	2.81	3.21	3.24	2.77	1.56	0.87
Gata4	-0.869727	0.772388	6.46956	0.0109737	0.10516	0.73	0.423333	0.8	0.76	0.63	0.55	0.39	0.33
Ablim1	-0.869372	8.74498	5.79435	0.0160777	0.136921	100.333	57.3833	92.46	108.53	100.01	77.11	65.63	29.41
Plxna3	-0.869092	1.15937	5.43356	0.0197534	0.15907	0.393333	0.203333	0.35	0.36	0.47	0.15	0.32	0.14
Pim1	-0.86706	2.65526	6.08743	0.0136147	0.121031	5	2.62667	5.36	2.66	6.98	2.81	2.69	2.38
Phactr1	-0.86657	5.96437	6.30107	0.0120665	0.112299	16.4033	9.20333	16.38	19.82	13.01	11.85	10.17	5.59
Nrk	-0.865701	1.86101	4.7556	0.0292032	0.208579	0.76	0.423333	0.78	1.08	0.42	0.56	0.34	0.37
Amy1	-0.864323	3.01885	6.23817	0.0125025	0.11456	7.64333	4.29667	8.26	9.5	5.17	5.34	4.57	2.98
Heatr7a	-0.862175	4.81855	6.95327	0.00836663	0.0864598	7.21333	4.03	6.43	6.87	8.34	5.1	4.59	2.4
Dag1	-0.860696	7.08394	7.18962	0.00733264	0.0781635	45.7533	26.2233	40.34	41.19	55.73	31.14	28.93	18.6
Usp35	-0.860402	1.47405	3.92743	0.0475044	0.284465	0.966667	0.493333	0.77	1.07	1.06	0.57	0.76	0.15
Edem3	-0.860119	5.47398	4.86347	0.0274311	0.19934	10.1967	5.84	10.13	12.35	8.11	7.97	7.06	2.49
Lpcat1	-0.860112	4.49194	6.23759	0.0125067	0.11456	18.7833	10.9467	19.76	19.17	17.42	13.21	13.45	6.18
Prkar2a	-0.859888	5.08103	6.62269	0.0100687	0.0994557	12.5867	7.18333	11.35	13.01	13.4	7.67	9.55	4.33
Icmt	-0.859835	4.88207	6.19453	0.0128146	0.11637	9.2	5.18333	8.33	10	9.27	5.86	6.89	2.8
Dkk3	-0.859788	6.14468	6.61486	0.0101131	0.0995505	32.7867	18.56	38.63	31.2	28.53	19.14	12.76	23.78
Gan	-0.859284	2.32292	5.95634	0.0146645	0.127062	2.68333	1.58667	2.08	2.28	3.69	1.31	2.13	1.32
Gab2	-0.859234	5.63543	6.35882	0.0116799	0.109767	12.3933	6.9	11.25	13.52	12.41	7.53	9.22	3.95
Fam59a	-0.858896	2.57855	7.79417	0.0052415	0.0604851	1.81333	1.09333	1.97	1.68	1.79	0.93	1.32	1.03
Slc4a3	-0.858327	3.52818	7.89602	0.00495437	0.0579643	3.51333	2.01	2.83	3.42	4.29	2.06	1.88	2.09
Atp11a	-0.858293	5.30907	7.3382	0.00675043	0.0737306	7.66667	4.36667	5.86	8.85	8.29	4.14	5.26	3.7
C1qtnf1	-0.857448	5.98827	6.02753	0.0140844	0.123558	18.58	10.71	17.76	20.81	17.17	13.72	12.19	6.22
Fn3k	-0.856395	2.04483	6.65411	0.00989276	0.0983758	5.49333	3.12333	5.44	4.95	6.09	3.6	3.21	2.56
Zfp316	-0.855618	1.5363	4.19607	0.0405178	0.258291	0.586667	0.33	0.23	0.64	0.89	0.37	0.37	0.25
Chst10	-0.854325	1.05273	4.96071	0.0259295	0.192066	0.996667	0.553333	0.96	1.26	0.77	0.63	0.33	0.7
Npr2	-0.854108	5.99399	8.04132	0.00457223	0.0542963	25.1067	14.39	24.87	24.9	25.55	15.76	16.57	10.84
Mllt1	-0.852775	4.88704	7.96211	0.00477667	0.0562492	12.4633	7.05333	12.53	11.23	13.63	6.58	8.55	6.03
C1rl	-0.852684	3.68892	7.86145	0.00504999	0.0588113	6.61333	3.74333	5.52	7.28	7.04	4	3.27	3.96
Scd1	-0.852495	5.25426	6.94954	0.00838409	0.0865695	11.9533	6.84	12.36	12.4	11.1	9.29	6.45	4.78
Dgkb	-0.852307	0.904543	5.543	0.0185547	0.151852	0.416667	0.23	0.55	0.32	0.38	0.24	0.3	0.15
Ncoa1	-0.852156	4.09446	4.53756	0.0331589	0.226354	3.24667	1.83	2.65	3.81	3.28	1.47	3.16	0.86
Man1c1	-0.851295	6.07617	6.90595	0.00859093	0.0879943	21.6533	12.3967	16.89	20.26	27.81	10.57	14.72	11.9
Apba1	-0.850858	3.87746	7.84542	0.00509497	0.0590093	3.13333	1.80333	2.56	3.26	3.58	1.87	2.05	1.49
Prkaca	-0.849717	5.60686	6.97991	0.00824296	0.0854608	33.25	18.8933	33.31	31.94	34.5	14.86	26.43	15.39
Mlxip	-0.847634	5.42493	7.17074	0.0074102	0.0785643	16.49	8.58333	17.79	14.22	17.46	8.52	12.47	4.76
C1ra	-0.847417	8.21127	8.29989	0.00396476	0.0483542	138.887	80.5467	127.08	152.13	137.45	85.94	90.05	65.65
Plekhb2	-0.8469	6.90862	7.88613	0.00498154	0.0581747	57.2533	32.9867	53.09	54.12	64.55	38.75	34.02	26.19
Ctif	-0.846784	2.60071	5.7982	0.0160426	0.136756	1.40333	0.793333	1.09	1.08	2.04	0.7	0.7	0.98
C1rb	-0.84575	7.15314	8.14495	0.00431812	0.0518133	0.0833333	0.0733333	0.13	0.04	0.08	0.09	0.06	0.07
Aph1b	-0.845506	8.26575	5.37834	0.0203883	0.162222	96.05	54.6333	103.44	119.22	65.49	72.07	62.57	29.26
Boc	-0.845475	5.86971	5.79032	0.0161147	0.137002	19.57	11.4267	18.6	23.37	16.74	16.34	10.86	7.08
Insig1	-0.841732	4.53491	4.35719	0.0368531	0.241722	13.7967	7.98	15.11	15.2	11.08	11.39	9.3	3.25
Rac3	-0.841637	0.32958	5.02837	0.0249353	0.18689	1.86667	0.986667	2.42	1.47	1.71	0.84	0.77	1.35
Tmtc2	-0.840554	5.45553	5.21549	0.0223865	0.173418	11.6167	6.62	10.68	12.86	11.31	9.23	7.36	3.27
Spred2	-0.837932	2.04331	4.81277	0.0282496	0.203504	2.09	1.19333	1.94	1.94	2.39	1.87	1.2	0.51
Csk	-0.83556	3.34452	7.12041	0.00762112	0.0802035	6.67	3.81	6.37	5.66	7.98	3.31	3.74	4.38
Card14	-0.835511	2.42993	6.95576	0.00835496	0.0864097	0.0533333	0.05	0.05	0.03	0.08	0.1	0.05	0
Slc7a2	-0.834582	3.77224	4.73543	0.0295475	0.210069	2.62333	1.53	2.53	3.29	2.05	2.33	1.48	0.78
Plxnc1	-0.8342	0.973849	4.02239	0.0449001	0.274983	0.36	0.18	0.53	0.37	0.18	0.22	0.21	0.11
Axin1	-0.834001	4.59343	4.42425	0.0354317	0.235906	9.79667	5.69667	6.73	10.2	12.46	3.74	9.3	4.05
Elmod2	-0.833995	3.78159	4.39499	0.0360446	0.238147	4.52	2.61667	5.23	4.86	3.47	3.19	3.56	1.1
Foxc1	-0.831342	6.16807	6.40935	0.0113521	0.107484	27.73	16.15	23	24.5	35.69	13.47	20.56	14.42
Stk11	-0.831032	5.03141	6.00741	0.0142459	0.124544	29.8567	16.5933	29.05	19.78	40.74	14.96	20.24	14.58
Gnai1	-0.830237	3.79546	5.97568	0.0145045	0.126084	6.85	3.93667	8.58	4.7	7.27	3.04	4.23	4.54
Ptprb	-0.829993	10.5245	5.46097	0.0194458	0.157193	180.747	105.523	167.49	194.79	179.96	139.27	121.93	55.37
Ece1	-0.828925	10.0125	5.8725	0.0153792	0.132169	318.03	186.427	262.14	374.39	317.56	237.73	210.21	111.34
Fads2	-0.828805	5.54265	5.83948	0.0156705	0.134035	45.87	26.7367	50.8	44.25	42.56	39.59	24.04	16.58
Krt80	-0.828753	7.24862	6.22034	0.0126291	0.115181	101.817	58.38	75.54	94.94	134.97	70.04	49.38	55.72
Nrarp	-0.823472	6.29992	4.43661	0.0351761	0.234736	47.4133	27.46	37.32	34.29	70.63	19.09	24.94	38.35
Sema5a	-0.821532	2.15333	4.26264	0.0389594	0.251113	0.596667	0.346667	0.76	0.41	0.62	0.54	0.22	0.28
Asb1	-0.820111	2.98408	6.33601	0.0118311	0.110777	2.05667	1.19	1.41	2.38	2.38	1.09	1.41	1.07
Abat	-0.819669	4.40091	6.37071	0.0116019	0.109288	6.95667	4.04667	6.74	6.67	7.46	4.9	4.7	2.54
Mib1	-0.819553	2.95143	4.08906	0.0431618	0.269288	2.62333	1.53333	2.42	2.9	2.55	0.88	2.83	0.89
Wwc2	-0.818658	6.02566	6.76416	0.00930067	0.0938145	18.5333	10.8033	14.36	18.37	22.87	10.46	13.24	8.71
Glis2	-0.818381	4.01254	6.28705	0.0121623	0.112523	6.56333	3.92	5.81	6.32	7.56	4.43	4.85	2.48
Myrip	-0.817883	5.77559	5.54988	0.0184819	0.151432	16.7233	9.71667	14.64	15.81	19.72	10.64	12.87	5.64
Peg13	-0.81731	6.66177	4.57565	0.0324295	0.22299	33.2767	19.6767	32.37	37.97	29.49	26.27	23.93	8.83
Fblim1	-0.816992	8.90195	7.96733	0.00476291	0.0561394	233.663	138.04	220.53	225.18	255.28	152.07	138.68	123.37
Npm3	-0.815252	0.638477	4.07202	0.0435992	0.270949	3.17333	1.61	4.49	1.54	3.49	1.99	1.51	1.33
Tnpo2	-0.814496	3.82724	6.19226	0.0128311	0.116402	4.09	2.24667	3.04	3.83	5.4	2.72	2.18	1.84
Mettl7a1	-0.813856	6.67782	5.59146	0.0180483	0.148939	84.4533	49.8167	87.71	82.79	82.86	51.4	69.21	28.84
Prkaa2	-0.812496	3.12011	6.40344	0.01139	0.107533	1.55	0.893333	1.55	1.49	1.61	1.24	0.72	0.72
Slc45a4	-0.812145	4.21896	5.08791	0.0240932	0.18292	5.96667	3.77333	4.92	6.26	6.72	2.96	5.71	2.65
Fam198b	-0.811914	8.85639	4.3666	0.0366499	0.241139	106.573	63.4467	109.81	122.68	87.23	91.14	70.86	28.34
Man2b2	-0.811786	5.10719	7.23909	0.00713331	0.0769254	15.1633	8.85333	14.33	15.04	16.12	10.58	8.92	7.06
Ppp6r1	-0.811751	6.65222	6.80105	0.00911044	0.0922632	39.04	22.9867	34.17	38.33	44.62	20.77	29.55	18.64
Epn1	-0.811187	3.89425	7.37396	0.00661749	0.0727511	8.15	4.60333	7.81	7.5	9.14	4.94	4.54	4.33
Spata13	-0.810665	4.48482	4.95074	0.0260795	0.192952	4.24	2.50667	4.03	5.33	3.36	3.44	2.75	1.33
Chrd	-0.810432	4.34403	4.88148	0.0271463	0.198066	9.03333	5.28667	6.33	7.48	13.29	4.56	4.39	6.91
Txndc5	-0.809293	9.2335	7.18896	0.00733535	0.0781635	353.987	209.953	314.46	348.41	399.09	203.45	253.3	173.11
Sacs	-0.80764	1.94498	4.50891	0.0337186	0.228871	0.633333	0.46	0.35	0.55	1	0.46	0.48	0.44
4931414P19Rik	-0.80653	4.11809	7.18732	0.00734207	0.0781692	10.3633	6.05333	9.48	11.21	10.4	6.43	5.08	6.65
Gaa	-0.806264	8.15237	6.47335	0.0109504	0.105096	115.737	68.24	90.13	105.29	151.79	66.85	67.72	70.15
Nfe2l1	-0.805299	8.12844	5.19734	0.0226214	0.174562	92.1233	54.5267	86.47	99.62	90.28	78.79	55.06	29.73
Acot2	-0.804947	2.48764	7.09978	0.00770932	0.0809223	3.36	1.88667	3.93	3.21	2.94	2.19	2.03	1.44
Irs1	-0.804838	2.19419	5.37944	0.0203754	0.162222	0.723333	0.453333	0.67	0.7	0.8	0.54	0.28	0.54
Npnt	-0.80478	7.15583	6.08992	0.0135955	0.120946	57.29	34.51	63.85	39.49	68.53	39.89	35.9	27.74
Ccdc65	-0.803731	0.526664	5.36687	0.0205228	0.162574	0.963333	0.496667	0.84	0.83	1.22	0.31	0.42	0.76
Slit3	-0.803689	2.35231	6.20948	0.0127068	0.11564	1.38333	0.76	1.58	1.13	1.44	0.74	0.95	0.59
Sidt2	-0.802681	6.75724	5.76369	0.0163607	0.138535	36.9333	21.9633	33.58	38.49	38.73	21.87	30.24	13.78
Cd97	-0.801277	8.56831	4.75745	0.0291718	0.208571	176.72	104.27	181.35	192.27	156.54	127.4	134.42	50.99
Gyk	-0.80109	2.97053	6.27142	0.0122701	0.113147	2.54	1.49667	3.05	1.9	2.67	1.7	1.39	1.4
Klhl21	-0.799463	4.98172	6.0807	0.0136667	0.121153	12.1133	7.22333	10.54	11.16	14.64	5.66	9.37	6.64
Bmp1	-0.799029	5.74869	7.16833	0.0074202	0.0786044	20.95	12.4167	19.44	20.58	22.83	10.56	14.83	11.86
Ptger4	-0.798861	6.83023	4.84752	0.0276859	0.200609	61.6533	36.5667	59.99	80.49	44.48	38.36	49.27	22.07
Kirrel	-0.798735	4.67482	6.30121	0.0120656	0.112299	4.9	2.73	4.05	4.86	5.79	3.57	2.46	2.16
Kdelr3	-0.798685	5.90725	5.06899	0.0243576	0.1842	71.7733	42.2133	73.39	60.16	81.77	40.59	27.07	58.98
Fhl1	-0.798108	10.4376	7.72174	0.00545599	0.0623352	922.867	549.273	1008.07	904.32	856.21	613.39	538.12	496.31
Tmed8	-0.797884	2.77876	6.61984	0.0100849	0.0994557	1.38667	0.786667	1.44	1.53	1.19	0.86	0.93	0.57
Rbpms2	-0.7961	3.22179	6.11184	0.0134279	0.11996	7.03	4.21	8	5.34	7.75	3.98	3.7	4.95
Rnf217	-0.795731	4.26843	6.42485	0.0112534	0.106789	10.1533	5.96333	9.87	9.93	10.66	4.41	7.54	5.94
4933426M11Rik	-0.794732	6.20101	5.68674	0.0170936	0.143303	21.8967	13.0533	18.79	23.46	23.44	16.94	14.14	8.08
Fgfr3	-0.794397	7.12671	5.73975	0.0165852	0.140061	51.66	31.1633	51.18	56.81	46.99	39.08	35.85	18.56
Trps1	-0.793859	3.06656	4.04449	0.0443158	0.272826	1.2	0.686667	1.2	1.5	0.9	1.05	0.71	0.3
Arhgef10l	-0.792939	4.09886	5.3705	0.0204801	0.162548	5.58667	3.34333	5.26	3.76	7.74	3.65	3.63	2.75
Hs1bp3	-0.792473	3.63269	6.46607	0.0109953	0.105208	6.21	3.69667	5.01	5.95	7.67	4.29	3.44	3.36
Zfp872	-0.792347	2.87815	4.78606	0.028691	0.205895	3.27	1.9	3.24	3.87	2.7	2.97	1.51	1.22
Aim1	-0.791785	4.60514	4.14191	0.0418339	0.263864	4.84333	2.87	4.79	5.93	3.81	3.94	3.32	1.35
Mapkapk2	-0.790961	6.31248	6.50387	0.010764	0.103621	48.12	28.5567	40.64	47	56.72	25.57	35.3	24.8
Antxr1	-0.790895	4.11336	6.88801	0.00867757	0.0887313	4.83	2.82	5	4.43	5.06	3.23	2.97	2.26
Metrnl	-0.790884	6.58488	5.6314	0.0176415	0.146693	61.54	36.3033	61.78	63.63	59.21	26.54	32.71	49.66
Nomo1	-0.788703	5.74851	5.04773	0.0246582	0.185756	18.36	10.9767	15.11	18.74	21.23	14.44	12.21	6.28
Adamts10	-0.788456	7.65523	6.07753	0.0136912	0.121286	61.2967	36.0133	54.06	67.6	62.23	43.5	41.03	23.51
Col4a1	-0.78803	8.43358	5.33461	0.020906	0.164788	74.6833	44.95	61	56.94	106.11	53.14	38.13	43.58
Trim62	-0.787409	5.16773	5.90275	0.0151173	0.130272	17.2867	10.2367	14.64	16.59	20.63	7.6	12.2	10.91
C030046E11Rik	-0.78731	2.98525	5.59772	0.0179839	0.148675	1.74667	0.973333	1.57	2.02	1.65	0.88	1.33	0.71
Gnaq	-0.786813	6.80396	6.14702	0.0131634	0.118293	28.6867	17.25	24.23	28.01	33.82	19.12	20.27	12.36
Ptger1	-0.786286	4.38678	6.17484	0.0129579	0.116917	8.68333	5.16667	8.56	7.34	10.15	5.58	6.23	3.69
Adamtsl4	-0.786228	6.11421	5.92774	0.0149043	0.128875	25.7767	15.3233	20.48	23.34	33.51	17.35	12.54	16.08
Megf8	-0.785118	4.1305	4.94746	0.026129	0.193092	2.38	1.41333	2.2	2.12	2.82	2.11	1.19	0.94
Pdgfd	-0.784828	7.84889	7.2389	0.00713409	0.0769254	160.9	96.7267	153.16	155.4	174.14	101.53	107.19	81.46
Lrrc47	-0.784824	5.50586	5.35193	0.0206993	0.163464	15.7867	9.61333	15.95	13.81	17.6	7.89	14.38	6.57
Ptpn21	-0.784306	4.06939	4.75701	0.0291791	0.208571	4.21333	2.58	3.87	4.51	4.26	2.94	3.47	1.33
Dip2a	-0.783848	3.52571	5.37046	0.0204806	0.162548	2.43667	1.41667	1.47	3.22	2.62	1.5	1.37	1.38
Slc35e1	-0.783809	5.9525	5.55097	0.0184705	0.151432	13.0567	7.87333	10.38	13.54	15.25	6.22	10.79	6.61
Lamb2	-0.783691	8.73481	5.96049	0.01463	0.126929	110.937	66.5133	82.1	103.31	147.4	65.96	71.75	61.83
Zdhhc8	-0.783438	4.81909	5.92447	0.014932	0.129027	8.16333	4.88667	7.53	6.63	10.33	4.87	5.93	3.86
Fads1	-0.783098	6.33501	6.62345	0.0100645	0.0994557	35.78	21.5067	34.14	39.34	33.86	23.42	25.35	15.75
Smo	-0.783005	5.03747	6.24601	0.0124473	0.114347	12.3733	7.37	10.49	10.72	15.91	7.07	7.57	7.47
Ston1	-0.781829	1.40889	4.03853	0.0444725	0.27329	1.26	0.766667	1.03	1.07	1.68	0.66	1.18	0.46
Gmeb2	-0.781586	3.85677	4.91939	0.0265569	0.194951	5.37333	3.18	5.32	6.39	4.41	4.04	3.79	1.71
B4galt1	-0.78083	6.57467	4.49633	0.0339678	0.229842	35.8467	21.64	35.28	40.36	31.9	31.69	22.6	10.63
Eif2ak3	-0.780759	4.57054	4.49567	0.0339809	0.229842	7.72667	4.66667	6.15	8.13	8.9	4.12	7.13	2.75
D0H4S114	-0.78056	6.03607	6.56913	0.0103762	0.100963	49.0367	29.3033	49.49	41.64	55.98	29.36	25.59	32.96
Fndc3b	-0.780448	7.90666	5.5775	0.0181927	0.149741	51.87	31.4167	44.75	57.2	53.66	40.54	34.07	19.64
Celsr1	-0.780237	2.73535	4.67222	0.0306543	0.215812	0.803333	0.466667	0.69	0.69	1.03	0.56	0.58	0.26
Ppp1r3d	-0.779446	2.9486	6.19953	0.0127784	0.116125	3.51667	2.15	3.79	3.03	3.73	2.39	2.52	1.54
Arhgef10	-0.778943	6.43067	6.67404	0.00978274	0.0977465	23.3467	14.1267	21.23	24.46	24.35	16.46	15.25	10.67
Apeg3	-0.776631	2.34245	5.00211	0.0253165	0.18874	5.12	2.85667	6.38	3.58	5.4	4.02	2.92	1.63
Acta2	-0.776203	10.2334	4.59791	0.032011	0.221073	1068.4	637.923	1277.59	588.91	1338.69	607.78	558.72	747.27
Tspyl4	-0.776093	3.76456	4.27777	0.038614	0.249522	5.14	3.12667	3.93	6.59	4.9	3.57	4.21	1.6
9030418K01Rik	-0.775465	2.94784	6.10029	0.013516	0.120438	5.31333	3.10333	4.78	4.94	6.22	2.73	3.81	2.77
Zfp106	-0.773643	6.3904	6.53405	0.0105829	0.102344	13.2367	7.87333	10.95	15.5	13.26	9.12	7.92	6.58
Strbp	-0.7733	6.05409	6.94244	0.00841741	0.0867014	5.76667	3.48333	6.03	6.17	5.1	3.7	3.91	2.84
Sox13	-0.77232	7.46142	6.56114	0.010423	0.101293	70.34	42.67	64.76	67.9	78.36	38.35	52.6	37.06
Fzd4	-0.772022	6.98805	4.92396	0.0264867	0.194826	51.95	31.4567	52.39	56.17	47.29	40.53	36.73	17.11
Ptpdc1	-0.770389	3.26557	5.00744	0.0252386	0.188285	3.29333	1.98	3.04	3.67	3.17	2.5	2.3	1.14
Bcl2	-0.769733	3.53528	6.68854	0.00970345	0.0972573	3.46333	2.29	3.28	3.64	3.47	2.67	2.28	1.92
Tmem184b	-0.769704	8.32693	6.14659	0.0131665	0.118293	137.913	84.6467	112.99	136.25	164.5	98.16	89.71	66.07
Thrb	-0.768997	3.43347	5.56084	0.0183666	0.150862	2.51667	1.50667	2.57	2.72	2.26	1.96	1.51	1.05
Ntrk2	-0.767963	1.72815	5.46863	0.0193608	0.156606	0.736667	0.43	0.87	0.64	0.7	0.53	0.34	0.42
Mink1	-0.767723	4.16232	5.8644	0.0154501	0.13267	5.03667	2.97333	5.26	5.14	4.71	3.81	3.16	1.95
Nnmt	-0.76771	4.34563	4.48791	0.0341354	0.230239	33.3133	19.9467	29.95	28.26	41.73	17.7	13.52	28.62
Col6a3	-0.766975	3.83992	3.95441	0.0467486	0.281171	2.08667	1.29333	2.28	1.44	2.54	2	1.17	0.71
Peg3	-0.76631	4.0059	5.75067	0.0164824	0.139379	3	1.76333	2.53	3.39	3.08	2.06	2.05	1.18
1110067D22Rik	-0.766201	4.52557	6.29017	0.0121409	0.11243	9.87667	5.84667	11.08	8.56	9.99	6.19	7.04	4.31
St3gal5	-0.765853	6.78009	6.25273	0.0124002	0.113997	76.9267	46.0833	69.94	67.42	93.42	47.25	40.91	50.09
Kctd3	-0.765604	3.87714	6.20677	0.0127262	0.115734	5.88	3.53	5.56	5.37	6.71	3.28	4.42	2.89
Nrip1	-0.765172	6.22642	4.35477	0.0369055	0.241815	23.7633	14.41	27.02	26.59	17.68	16.97	18.84	7.42
Dagla	-0.764803	0.483619	4.45288	0.0348424	0.233617	0.313333	0.2	0.24	0.41	0.29	0.22	0.25	0.13
Nfatc4	-0.764473	1.67814	4.57318	0.0324762	0.22319	1.17667	0.693333	0.69	1.18	1.66	0.68	0.85	0.55
Aven	-0.763437	4.21667	5.77082	0.0162944	0.138159	23.4433	14.42	22.89	22.88	24.56	10.5	16.85	15.91
Thra	-0.761588	5.1654	5.59838	0.0179771	0.148675	22.8533	13.8033	21.3	17.96	29.3	14.76	11.77	14.88
Ank	-0.761493	5.41803	6.87561	0.00873799	0.0891331	18.6967	11.44	20.16	18.56	17.37	10.95	13.31	10.06
Myh10	-0.761438	5.35009	5.08231	0.0241711	0.183223	7.51333	4.51	6.57	5.44	10.53	4.06	4.26	5.21
Pcnxl3	-0.760754	4.14405	4.89897	0.0268727	0.196411	3.32	2.05	3.56	3.11	3.29	2.94	1.96	1.25
Slc16a7	-0.759181	2.32787	3.99576	0.0456149	0.277615	2.73667	1.50333	3.73	2.37	2.11	2.1	0.92	1.49
BC032203	-0.757731	3.78136	5.40304	0.0201017	0.161157	3.06333	1.84	2.72	3.31	3.16	1.92	2.41	1.19
4930412C18Rik	-0.75751	0.952766	3.93366	0.0473287	0.283547	0.63	0.37	0.66	0.68	0.55	0.65	0.19	0.27
Atp2a2	-0.757033	7.01857	5.91438	0.0150178	0.129556	40.22	23.4067	34.87	38.33	47.46	21.43	30.86	17.93
Cul9	-0.756613	3.46603	5.38167	0.0203494	0.162222	1.66	0.98	1.49	1.59	1.9	1.37	0.74	0.83
Rcn1	-0.756115	7.88491	7.09749	0.0077192	0.0809588	119.7	72.7033	124.41	121.54	113.15	71.71	76.94	69.46
Slc44a1	-0.755638	6.25436	3.98171	0.0459968	0.279	38.12	23.4567	38.32	42.43	33.61	19.01	38.76	12.6
Ly75	-0.755087	3.78505	3.84815	0.049801	0.294181	3.60333	2.10333	3.47	4.71	2.63	3.22	2.05	1.04
Arih1	-0.754524	5.54016	4.8145	0.0282213	0.203447	10.5533	6.37	9.13	12.8	9.73	7.78	7.7	3.63
Atp6v0a1	-0.754194	6.10835	4.69221	0.0302997	0.214043	25.4133	15.6	25.99	26.31	23.94	21.06	17.39	8.35
Sgsh	-0.753015	4.49718	4.93516	0.0263156	0.194018	7.70333	4.72333	7.85	7.61	7.65	6.12	5.33	2.72
Med24	-0.752896	6.18647	6.43281	0.0112031	0.106471	31.1667	18.93	26.9	30.72	35.88	21.15	17.84	17.8
Cdk16	-0.75247	6.87984	6.00617	0.0142559	0.124545	56.1267	33.8133	49.74	52.67	65.97	29.91	41.72	29.81
Smg5	-0.75241	3.94789	5.39928	0.020145	0.161367	4.59	2.87667	4.41	4.81	4.55	4.09	2.47	2.07
March8	-0.751613	5.94166	6.49765	0.0108017	0.103905	20.36	12.44	18.77	20.91	21.4	12.34	14.63	10.35
Rgmb	-0.751575	5.83725	6.47416	0.0109454	0.105096	31.15	19.5067	31.82	32.17	29.46	18.77	23.57	16.18
Obscn	-0.750896	5.16367	6.45053	0.0110919	0.105732	1.88	1.14333	2.03	1.92	1.69	1.18	0.94	1.31
Kdm4a	-0.750838	3.17444	4.88327	0.0271182	0.197975	2.94333	2.03	2.71	3.38	2.74	2.5	2.53	1.06
Tmcc3	-0.750771	7.08396	5.19643	0.0226333	0.174562	36.04	22.4333	27.93	36.57	43.62	22.12	28.86	16.32
0610007L01Rik	-0.750539	6.66975	6.28482	0.0121777	0.112523	42.48	25.67	44.74	43.66	39.04	22.59	32.21	22.21
Slc35e3	-0.749575	3.87496	5.37155	0.0204678	0.162548	6.35667	3.91333	5.92	5.99	7.16	3.86	5.18	2.7
Pcolce	-0.74944	4.54095	6.33935	0.0118088	0.11065	23.3	14.2233	23.58	21.26	25.06	15.25	12.22	15.2
Chsy1	-0.748821	4.39557	5.44621	0.0196108	0.158224	7.57333	4.59	6.52	7.13	9.07	3.86	4	5.91
Zdhhc5	-0.747104	6.06219	4.45688	0.034761	0.233377	20.1733	12.0233	19.51	22.4	18.61	15.77	14.34	5.96
Osgin1	-0.746813	4.15399	3.9545	0.0467463	0.281171	13.7433	8.38333	14.34	15.62	11.27	8.76	11.93	4.46
Erbb2	-0.746686	5.28817	4.69852	0.0301886	0.213515	11.2	6.96	10.16	11.68	11.76	7.97	9.11	3.8
Mthfr	-0.745797	4.56438	5.89752	0.0151623	0.130482	5.36333	3.4	4.34	5.43	6.32	4.15	2.92	3.13
Sgpp1	-0.744833	5.127	5.59446	0.0180173	0.148781	16.4033	10.0467	18.04	17.7	13.47	7.86	12.81	9.47
Tbx18	-0.744143	3.74999	6.32689	0.0118921	0.111265	4.29	2.60333	4.18	4.36	4.33	2.78	2.28	2.75
Usp12	-0.743922	3.84482	5.51059	0.0189017	0.153926	5.02667	3.05	5.22	5.01	4.85	3.24	3.94	1.97
C1qtnf5	-0.743619	5.90533	3.85551	0.0495827	0.293404	73.6	44.49	64.64	62.21	93.95	31.45	33.88	68.14
Mfrp	-0.743619	5.90533	3.85551	0.0495827	0.293404	0.146667	0.0566667	0.09	0.15	0.2	0.03	0.05	0.09
Ulk3	-0.743386	4.55608	4.70861	0.0300119	0.212484	11.0733	6.78667	10.89	11.86	10.47	8.09	8.3	3.97
Nkx6-2	-0.743199	2.77087	5.11098	0.0237749	0.181196	0.0366667	0.00666667	0.06	0.05	0	0.02	0	0
Ttc17	-0.743132	5.35474	5.09084	0.0240525	0.182828	12.5867	7.68	10.8	15.18	11.78	8.52	9.66	4.86
Hoxb9	-0.742387	3.84571	3.95429	0.0467519	0.281171	7.91333	4.74333	8.33	8	7.41	5.76	6.19	2.28
Ctdsp2	-0.742205	7.3919	5.00915	0.0252137	0.188285	52.7067	33.4967	47.12	57.52	53.48	38.34	41.54	20.61
Sepx1	-0.741951	2.98706	4.97349	0.0257387	0.191212	15.4067	9.25333	18.14	10.16	17.92	9.57	8.21	9.98
Kctd21	-0.741767	3.06014	5.6413	0.0175422	0.146385	4.23333	2.63	4.17	4.67	3.86	3.12	2.87	1.9
BC057079	-0.741126	3.72362	5.44035	0.0196767	0.158553	2.69	1.39667	2.65	3.15	2.27	1.62	1.82	0.75
Morc2a	-0.741057	4.16196	4.59956	0.0319802	0.220981	4.90333	2.92	4.24	5.64	4.83	3.89	3.21	1.66
Tbc1d10b	-0.74019	5.19745	4.32393	0.0375801	0.244896	15.0267	9.31333	11.92	14.05	19.11	6.64	13.84	7.46
Ppp1r12c	-0.739868	7.12259	5.34982	0.0207244	0.16356	65.5867	40.0467	61.41	58.61	76.74	28.36	45.84	45.94
Pld1	-0.738831	5.95535	4.3158	0.0377601	0.245761	18.3533	11.35	19.24	20.6	15.22	16.02	11.83	6.2
Ptgis	-0.738302	8.29143	6.67308	0.00978798	0.0977465	275.05	169.21	271.99	257.91	295.25	171.61	169.25	166.77
Mir546	-0.738087	3.91744	4.52914	0.0333224	0.22679	37.0867	15.46	49.17	20.36	41.73	22.96	19.74	3.68
Gata6	-0.737536	7.24203	6.07199	0.0137342	0.121581	67.7367	41.2767	65.73	58.95	78.53	36.45	45.72	41.66
Arl5a	-0.73744	6.17993	5.173	0.0229406	0.176431	21.1467	13.15	22.77	24.2	16.47	13.57	16.86	9.02
Fam134c	-0.737266	4.03649	4.63393	0.0313457	0.217547	8.05333	4.89333	6.73	6.7	10.73	6.53	4.19	3.96
Hoxa10	-0.737244	4.61504	6.50903	0.0107328	0.103478	16.2733	10.0067	15.69	16.12	17.01	9.74	10.69	9.59
Extl3	-0.73673	4.50268	3.96388	0.0464863	0.280802	5.57667	3.40667	5.72	6.19	4.82	4.57	4.01	1.64
Zfp362	-0.736664	3.49197	5.5778	0.0181896	0.149741	5.44333	3.25333	5.27	4.57	6.49	2.83	3.78	3.15
Als2cl	-0.736663	6.40118	5.50889	0.0189201	0.153926	23.3567	14.6033	19	24.66	26.41	17.59	15.23	10.99
Zfp551	-0.736584	1.78358	4.91382	0.0266427	0.195292	2.16	1.31	2.19	2.4	1.89	1.57	1.4	0.96
Usp54	-0.736484	4.66074	4.25758	0.0390756	0.251606	5.35667	3.33	4.97	6.26	4.84	4.64	3.65	1.7
Fkbp14	-0.735831	5.32657	6.46782	0.0109845	0.105184	23.54	14.4933	25.87	23.15	21.6	14.52	16.12	12.84
Pdxk	-0.734807	5.19401	5.4903	0.0191223	0.155193	10.3067	6.44667	9.91	11.4	9.61	8.02	6.83	4.49
Tns1	-0.734669	7.70868	5.73857	0.0165963	0.140062	29.28	18.2	29.4	26.18	32.26	23.12	17.03	14.45
Uhmk1	-0.734631	2.73914	4.1959	0.0405218	0.258291	4.08	2.66333	4.08	4.97	3.19	2.11	3.97	1.91
Smoc2	-0.734034	4.55429	5.30375	0.0212796	0.166798	12.6167	7.76	16.28	10.54	11.03	7.17	6.85	9.26
Ccdc8	-0.733517	2.70199	3.97876	0.0460775	0.279222	3.01667	2.07667	2.45	2.36	4.24	2.74	1.96	1.53
Rab19	-0.733476	2.62894	4.79974	0.028464	0.204731	7.37	4.54333	8.84	8.02	5.25	5.46	4.74	3.43
Steap3	-0.732545	4.96257	5.7681	0.0163197	0.13828	16.9767	10.7867	16.62	17.28	17.03	13.43	11	7.93
Cbr2	-0.731938	6.0378	5.57401	0.0182289	0.149851	110.423	66.71	116.61	99.16	115.5	71.78	49.82	78.53
A230051G13Rik	-0.730269	1.29767	4.79633	0.0285203	0.205019	0.923333	0.536667	1.09	0.67	1.01	0.54	0.66	0.41
Brpf3	-0.730044	2.67514	4.03177	0.0446512	0.274184	1.5	0.923333	1.83	1.07	1.6	0.83	1.39	0.55
Ccdc90a	-0.729418	6.45354	4.87382	0.0272671	0.19849	29.5933	18.6167	28.47	30.87	29.44	17.46	26.18	12.21
Trerf1	-0.728891	3.38324	4.22661	0.0397949	0.254683	2.89333	1.67	2.68	3.35	2.65	2.21	1.81	0.99
Art4	-0.727863	6.21438	6.12553	0.0133244	0.119288	45.81	28.7367	43.19	45.11	49.13	26.61	33.88	25.72
Otud1	-0.727669	5.53738	5.01456	0.025135	0.188052	27.6867	17.24	28.49	25.37	29.2	11.64	20.8	19.28
Ltbp1	-0.726829	6.5593	4.03022	0.044692	0.274184	24.6433	15.15	32.38	16.86	24.69	20.71	15.36	9.38
Micalcl	-0.726526	1.19431	4.65253	0.0310078	0.216547	1.10333	0.703333	1.15	1.06	1.1	0.77	0.87	0.47
Per1	-0.725862	4.40494	4.32354	0.0375886	0.244896	5.75	3.62333	5.88	6.05	5.32	4.44	4.37	2.06
Chpf2	-0.725842	5.74131	5.32801	0.0209854	0.165208	21.16	13.02	16.73	19.28	27.47	14.65	12.6	11.81
Bbs1	-0.725782	2.74308	4.53065	0.0332929	0.22671	1.69	1.1	1.52	1.52	2.03	0.91	1.6	0.79
Rbms3	-0.725646	5.49569	5.72352	0.0167391	0.140985	7.69667	4.77333	7.09	7.11	8.89	5.14	5.4	3.78
Zeb2	-0.72555	4.63324	3.9836	0.0459454	0.278848	3.80667	2.34	3.82	4.37	3.23	2.82	3.07	1.13
Pou6f1	-0.725175	1.94461	4.6075	0.0318325	0.22008	1.19	0.756667	1.45	1.22	0.9	0.7	1.02	0.55
Mir1903	-0.724988	1.66589	4.65222	0.0310134	0.216547	0	3.97	0	0	0	0	11.91	0
Gns	-0.724926	7.13839	5.31861	0.0210988	0.165845	54.9433	34.3533	50.66	58.83	55.34	35.47	43.8	23.79
Atmin	-0.724875	3.66873	5.29963	0.02133	0.166986	3.84667	2.42667	3.53	4.76	3.25	2.5	2.95	1.83
Htra3	-0.724487	4.27283	4.18585	0.0407627	0.259304	10.9167	6.67	12.51	7	13.24	5.35	5.83	8.83
Oxct1	-0.724379	6.18258	5.4267	0.0198311	0.159594	30.9133	19.1133	35.44	23.87	33.43	20.65	16.01	20.68
Smcr7l	-0.723482	4.58659	5.15728	0.0231492	0.177496	6.91333	4.35	7.15	7.19	6.4	5.59	4.56	2.9
Alg10b	-0.723008	2.24255	4.11181	0.0425849	0.26674	1.82333	1.14333	1.94	1.62	1.91	1.38	1.4	0.65
Pigt	-0.722798	5.01817	4.78877	0.0286459	0.205688	14.8467	8.89333	13.28	11.2	20.06	10.27	7.59	8.82
Clvs1	-0.721283	3.79712	5.02601	0.0249694	0.186935	0.01	0.00333333	0.03	0	0	0.01	0	0
Wdr35	-0.721147	3.50065	5.49006	0.0191249	0.155193	3.76	2.34333	3.83	4.45	3	2.61	2.3	2.12
Fbln5	-0.719183	11.0612	5.57394	0.0182297	0.149851	533.143	334.767	554.98	452.28	592.17	318.05	295.3	390.95
Nrp1	-0.718993	9.32614	4.92803	0.0264245	0.194594	154.58	97.67	151.8	136.97	174.97	131.21	94.32	67.48
4933430H15Rik	-0.71885	3.18833	5.03465	0.0248451	0.186545	1.34667	0.43	1.67	1.49	0.88	0.6	0.29	0.4
Tom1l2	-0.717946	6.37819	4.53163	0.0332739	0.226703	25.84	16.7867	23.41	25.99	28.12	20.77	19.94	9.65
Rhob	-0.716423	6.99492	5.37662	0.0204084	0.16228	86.9133	53.9067	76.28	74.95	109.51	56.55	47.66	57.51
Amigo2	-0.715518	9.44625	5.37997	0.0203692	0.162222	371.18	232.97	387.85	374.62	351.07	201.67	308.7	188.54
Lats2	-0.71521	7.06897	5.36581	0.0205353	0.162574	38.9633	24.2667	34.87	41.6	40.42	28.13	27.46	17.21
Sbf1	-0.715191	4.8821	5.60806	0.017878	0.148211	6.43667	4.03	5.6	6.44	7.27	4.81	4.04	3.24
Tnrc18	-0.714794	3.85111	5.15831	0.0231354	0.177496	2.73333	1.61	2.74	2.62	2.84	2.02	1.81	1
Slc12a8	-0.714655	3.95381	4.18608	0.0407573	0.259304	6.68667	4.1	4.7	6.46	8.9	3.44	3.66	5.2
Tmem164	-0.714161	4.51693	4.41871	0.035547	0.236043	6.87333	4.37667	6.63	4.91	9.08	5.23	3.92	3.98
1700019B03Rik	-0.713984	0.6389	4.54974	0.0329237	0.22562	1.04667	0.576667	1.15	0.89	1.1	0.56	0.56	0.61
Atp1a1	-0.713316	7.21101	4.14769	0.0416913	0.263358	58.7467	37.2167	53.51	51.66	71.07	44.75	45.74	21.16
Hdac11	-0.713162	1.02161	4.44166	0.0350721	0.234338	1.18667	0.696667	1.38	1.1	1.08	0.54	1	0.55
Ifi30	-0.713091	2.51959	4.00078	0.0454792	0.277322	8.35	5.95	7.87	7.18	10	9.04	5.09	3.72
Pak4	-0.713005	5.89195	5.97479	0.0145118	0.126084	28.58	18.3	27.17	28.5	30.07	18.04	16.79	20.07
Inpp5a	-0.710402	5.94659	4.39821	0.0359767	0.237946	32.1	20.3667	31.2	30.25	34.85	15.59	30.22	15.29
Grik5	-0.709351	2.57233	5.15841	0.023134	0.177496	1.96333	1.11	2	1.68	2.21	1.08	0.85	1.4
Hipk3	-0.708773	6.55782	4.48594	0.0341748	0.230239	18.47	11.77	17.35	20.4	17.66	15.45	12.85	7.01
Arap1	-0.708567	6.29108	5.69507	0.0170126	0.142719	22.6833	15.2167	19.25	24.07	24.73	14.66	17.19	13.8
Plekhh3	-0.708311	4.44191	4.45988	0.0346999	0.233377	10.1433	6.36667	10.65	8.03	11.75	4.61	8.39	6.1
Tmx4	-0.707945	6.16049	4.03953	0.0444462	0.273289	20.67	13.15	22.49	23.7	15.82	17.93	13.86	7.66
2900097C17Rik	-0.707468	7.77463	4.12204	0.042328	0.265657	67.5467	43.15	70.07	70.51	62.06	62.22	42.73	24.5
Lrp4	-0.707026	1.35934	3.86394	0.0493343	0.29238	0.583333	0.286667	0.54	0.67	0.54	0.27	0.3	0.29
Atrn	-0.706126	4.97533	4.59291	0.0321044	0.221477	5.08667	3.2	4.33	6.24	4.69	3.9	3.57	2.13
Nod2	-0.704326	2.00231	4.57961	0.0323547	0.222718	1.13	0.73	1.03	1.15	1.21	0.89	0.79	0.51
Foxk1	-0.704005	2.30077	4.66814	0.0307272	0.215812	0.9	0.55	0.71	0.91	1.08	0.64	0.64	0.37
Paqr5	-0.703805	2.19752	4.62333	0.03154	0.218416	1.73333	1.07333	1.48	1.72	2	1.18	0.8	1.24
Rab5b	-0.703748	6.02373	4.12316	0.0423001	0.26564	30.23	19.0867	30.66	34.51	25.52	25.14	21.4	10.72
Fnip2	-0.702933	3.92964	4.18096	0.0408806	0.259924	2.98667	1.89667	2.78	3.38	2.8	1.9	2.66	1.13
Stim2	-0.701317	6.17802	5.13942	0.0233885	0.178574	21.4167	13.5733	19.88	23.79	20.58	11.75	17.72	11.25
Dpysl2	-0.701197	5.6906	4.7524	0.0292575	0.208659	14.3167	8.38667	14.06	15.98	12.91	11.87	6.64	6.65
Hnmt	-0.701171	4.2875	4.41644	0.0355942	0.236043	19.1933	12.25	21.33	22.4	13.85	16.27	8.99	11.49
E430018J23Rik	-0.701148	2.61469	4.89955	0.0268637	0.196411	3.81667	2.15333	4.15	4.27	3.03	2.82	1.63	2.01
Ulk2	-0.700987	5.70328	4.6352	0.0313226	0.21751	12.87	8.13667	13.12	12.86	12.63	8.08	11.11	5.22
Rhobtb1	-0.70014	4.36127	5.19049	0.0227109	0.174983	6.45667	4.06333	6.43	5.38	7.56	3.5	4.76	3.93
Pik3r2	-0.700024	4.29909	5.30034	0.0213213	0.166986	8.96333	5.58333	7.99	8.41	10.49	5.07	5.34	6.34
Myo1d	-0.699357	6.51236	4.42329	0.0354517	0.235906	24.38	15.4133	21.47	25.83	25.84	20.4	16.26	9.58
Abl1	-0.697322	4.63338	4.58267	0.0322968	0.222561	5.74333	3.66	5.22	5.66	6.35	4.45	4.21	2.32
Hyal1	-0.696079	6.26393	5.62596	0.0176963	0.146897	53.94	34.3467	47.76	51.76	62.3	35.34	33.38	34.32
Tle3	-0.696039	3.4222	4.5673	0.0325878	0.223714	2.82	1.82333	2.39	2.86	3.21	2.2	2.1	1.17
Mettl7a2	-0.695772	3.00694	4.54069	0.0330982	0.226237	0.0633333	0.0666667	0.11	0.08	0	0.14	0.06	0
Robo1	-0.695758	1.12799	4.08059	0.0433785	0.270199	0.35	0.223333	0.26	0.44	0.35	0.26	0.22	0.19
Rusc2	-0.694535	5.4359	4.43104	0.035291	0.235321	11.3267	7.08333	9.94	11.27	12.77	9.96	6.15	5.14
Nacc1	-0.693309	3.94126	4.4542	0.0348156	0.233561	5.09	3.28	5.43	5.27	4.57	4.18	3.7	1.96
Tmtc4	-0.693016	4.67596	4.96263	0.0259008	0.191967	11.0033	7.01	12.23	12.26	8.52	8.38	6.91	5.74
Rarg	-0.691455	5.49586	4.23842	0.039519	0.253181	23.8333	15.24	24.43	23.41	23.66	19.35	17.76	8.61
St3gal2	-0.690667	6.62806	4.41232	0.0356804	0.236233	31.51	20.1633	24.43	27.65	42.45	17.37	20.31	22.81
Hoxb6	-0.690364	2.74776	4.58879	0.0321817	0.221889	7.20667	4.59667	6.98	7.2	7.44	5.02	6.19	2.58
Tmbim6	-0.690247	8.27281	5.23702	0.0221111	0.17172	197.63	124.353	182.55	195.87	214.47	126.89	103.02	143.15
Bag6	-0.689808	5.37551	5.24614	0.0219955	0.171243	14.0933	8.92333	13.99	13.5	14.79	11.05	9.08	6.64
Mcam	-0.689543	7.00334	4.9753	0.0257117	0.191124	64.0933	41.4433	66.94	52.58	72.76	45.05	48.1	31.18
Zfp652	-0.689087	2.49739	4.77109	0.0289414	0.207457	2.89667	1.79667	2.46	2.74	3.49	1.72	2.27	1.4
Pard3	-0.687571	4.90605	4.30019	0.0381082	0.247391	8.70667	5.57667	7.25	8.75	10.12	4.58	8.39	3.76
Pkn1	-0.686387	5.57369	5.41437	0.0199716	0.160325	18.1733	11.6667	16.16	17.94	20.42	10.33	13.28	11.39
Klf2	-0.684851	9.98414	5.50153	0.0189999	0.154476	859.517	546.44	951.78	783.84	842.93	484.79	570.15	584.38
Qsox2	-0.684491	5.15694	5.47264	0.0193164	0.156347	19.5267	13.0033	17.61	20.39	20.58	12.18	14.47	12.36
Fam38a	-0.682199	5.47203	4.87504	0.0272478	0.198464	6.67	3.69333	5.78	7.24	6.99	4.53	4.27	2.28
Usp20	-0.682084	3.35957	4.39118	0.0361252	0.238555	3.45	2.19	3.55	2.89	3.91	2.24	2.87	1.46
Ephx2	-0.681358	9.11802	4.20749	0.0402459	0.25705	413.243	266.917	459.5	419.27	360.96	366.33	266.49	167.93
Erlin2	-0.681195	6.99257	4.75835	0.0291565	0.208571	48.06	30.95	48.27	50.33	45.58	35.64	36.27	20.94
Lphn1	-0.679949	2.963	5.21459	0.0223982	0.173418	1.23667	0.74	1.28	1.07	1.36	0.68	0.77	0.77
Tsc22d2	-0.679824	5.16303	5.42297	0.0198735	0.159834	5.21333	3.47667	5.32	5.83	4.49	3.56	3.76	3.11
Ckap4	-0.679175	5.85735	4.06265	0.0438415	0.271655	29.99	19.19	27.81	23.97	38.19	14.94	25.74	16.89
Etnk1	-0.67877	6.22088	3.9978	0.0455596	0.277493	17.1067	11.03	15.88	20.14	15.3	13.34	13.4	6.35
Rassf3	-0.677141	6.18833	5.38939	0.0202596	0.162013	30.5567	19.7033	29.88	28.58	33.21	18.18	22.72	18.21
Bcap29	-0.677	6.84576	5.08017	0.024201	0.18334	102.677	66.13	124.69	105.14	78.2	68.76	68.25	61.38
Tgfa	-0.67688	5.76742	4.48616	0.0341704	0.230239	16.3733	10.5167	16.06	18.7	14.36	12.41	12.71	6.43
Fzd1	-0.67652	4.6239	5.35209	0.0206975	0.163464	8.29333	5.35667	8.06	7.53	9.29	5.34	5.36	5.37
Rai2	-0.675942	3.8551	4.91515	0.0266222	0.195255	9.47667	6.19667	8.96	9.03	10.44	7.82	5.52	5.25
Tbl2	-0.674921	4.11751	3.94677	0.0469615	0.281928	5.76333	3.77333	5.86	6.1	5.33	4.53	4.65	2.14
Abtb2	-0.674898	4.00869	4.02931	0.0447163	0.274184	4.99667	3.22333	4.46	3.59	6.94	3.4	2.71	3.56
Pgcp	-0.673803	8.93676	5.29319	0.021409	0.167294	401.11	257.693	408.65	402.51	392.17	254.76	226.09	292.23
Tbc1d30	-0.670942	2.67106	3.96363	0.0464934	0.280802	1.47667	0.94	1.14	1.77	1.52	0.89	1.24	0.69
Unc13d	-0.670649	5.23985	4.14329	0.0417998	0.26378	11.18	6.94667	9.86	11.37	12.31	7.66	8.8	4.38
Pelp1	-0.670536	3.55191	4.31136	0.0378587	0.24615	4.82333	3.06333	4.45	4.56	5.46	4.19	2.77	2.23
Zbtb4	-0.668912	5.80258	5.05928	0.0244944	0.184788	10.05	6.56	9.58	9.6	10.97	7.88	6.07	5.73
Rptor	-0.668896	4.19387	4.56382	0.0326542	0.223927	3.59	2.28667	2.81	3.46	4.5	2.27	2.58	2.01
Col16a1	-0.668513	2.33183	4.34414	0.0371366	0.242952	1.15667	0.763333	1.24	1.1	1.13	0.76	0.57	0.96
Trim65	-0.66756	3.6384	3.95399	0.0467605	0.281171	5.32333	3.47	5.79	5.66	4.52	3.51	4.91	1.99
Rab11fip3	-0.666434	5.33366	5.14543	0.0233076	0.178492	13.7133	9.64	12.07	13.72	15.35	9.17	10.25	9.5
Fam129b	-0.666237	7.70728	4.37563	0.0364564	0.24019	82.3933	53.7433	65.45	70.7	111.03	54.12	53.59	53.52
Tmem135	-0.665994	5.27412	3.8518	0.0496926	0.293816	15.2967	10.0667	15.39	16.33	14.17	12.63	11.67	5.9
C530005A16Rik	-0.665874	2.84111	4.54853	0.0329471	0.22562	1.07	0.863333	1.15	1.2	0.86	1.04	0.63	0.92
Smurf2	-0.665074	5.83817	4.36552	0.0366733	0.241167	14.87	9.71	11.62	15.54	17.45	7.71	11.97	9.45
Igf1r	-0.663596	4.30091	4.27974	0.0385693	0.249361	2.21	1.41333	1.78	1.94	2.91	1.6	1.43	1.21
Ankrd40	-0.663455	6.11018	4.70994	0.0299887	0.212484	29.4433	19.3367	28.43	27.66	32.24	15.71	24.24	18.06
Plxna1	-0.662267	3.814	4.11424	0.0425236	0.26662	2.18333	1.41333	1.86	1.76	2.93	1.21	1.68	1.35
Tcf7l2	-0.661288	5.84173	4.92145	0.0265252	0.194882	19.9833	12.83	19.23	21.97	18.75	15.78	13.13	9.58
Gigyf1	-0.660682	3.48039	4.54325	0.0330489	0.226021	2.55333	1.67667	2.31	2.72	2.63	1.96	1.78	1.29
Micall2	-0.660676	3.42109	4.33046	0.0374361	0.24428	4.32	2.72667	4.19	4.16	4.61	3.54	2.6	2.04
Syt7	-0.659639	3.47761	4.98424	0.0255792	0.190251	2.42667	1.62667	2.2	2.49	2.59	1.77	1.8	1.31
Arhgap44	-0.657344	5.19741	3.95878	0.0466276	0.281075	12.96	8.49	13.07	13.4	12.41	10.52	9.97	4.98
Galnt2	-0.657059	6.45944	4.1653	0.04126	0.261286	30.7233	20.2433	23.92	27	41.25	18.9	22.02	19.81
Skil	-0.657032	6.64135	4.01375	0.0451307	0.275995	22.1567	14.58	22.53	25.67	18.27	20.25	12.81	10.68
Scrib	-0.656505	3.53635	4.67951	0.0305245	0.21527	2.58	1.56667	2.3	2.29	3.15	1.39	1.73	1.58
Prpf19	-0.655895	5.21803	4.31801	0.037711	0.245568	26.64	17.4233	24.55	22.8	32.57	21.58	17.5	13.19
Tmem65	-0.655124	6.43282	4.10777	0.0426867	0.267017	35.2967	23.2967	36.81	35.72	33.36	22.08	31.92	15.89
Rell2	-0.653436	2.15791	4.33065	0.037432	0.24428	0.0633333	0.18	0.03	0.06	0.1	0.15	0.17	0.22
Tob2	-0.653296	6.2908	4.3144	0.0377911	0.245836	27.9967	18.4133	24.41	22.71	36.87	19.53	17.86	17.85
Igf2bp2	-0.6526	4.5204	4.84659	0.0277009	0.200609	8.31667	5.32667	7.62	8.7	8.63	6.28	5.1	4.6
Epha1	-0.652229	4.34633	4.06799	0.0437032	0.271328	2.11	1.2	1.91	2.06	2.36	1.5	0.55	1.55
Fut11	-0.650801	6.393	5.18129	0.0228314	0.175805	36.7233	23.8833	37.37	35.25	37.55	22.61	25.86	23.18
Rapgef2	-0.650777	5.01214	4.88023	0.0271659	0.198095	6.46333	4.19667	5.65	7.48	6.26	4.33	4.46	3.8
Zxda	-0.650772	2.59485	4.42438	0.0354291	0.235906	0.956667	0.62	1.08	0.84	0.95	0.82	0.62	0.42
Ppp4r2	-0.649587	5.99509	4.44559	0.0349915	0.234245	25.75	17.0467	25.43	27.84	23.98	19.86	18.98	12.3
Golga2	-0.64925	5.51446	4.00621	0.0453331	0.276698	14.46	9.50333	13.47	15.26	14.65	11.96	10.75	5.8
Klk11	-0.648024	5.31232	4.61506	0.0316923	0.219351	45.77	30.13	43.18	54.71	39.42	32.38	26.76	31.25
Fbxw8	-0.647904	5.79952	4.66026	0.0308685	0.21637	16.01	10.51	15.65	14.52	17.86	8.85	12.36	10.32
Asph	-0.647374	7.09684	4.41635	0.035596	0.236043	53.3267	36.0333	59.7	54.07	46.21	44.8	36.31	26.99
Npr1	-0.647214	6.65675	4.04728	0.0442426	0.272539	34.2	22.54	33.11	34.55	34.94	27.08	26.37	14.17
Nup188	-0.646883	4.13096	4.51023	0.0336927	0.228871	4.26667	2.76333	4.11	4.75	3.94	3.36	2.88	2.05
Sspn	-0.645312	5.5389	4.66772	0.0307346	0.215812	15.0133	9.98	14.88	14.66	15.5	11.09	11.39	7.46
Hip1r	-0.644734	5.81965	3.96067	0.0465753	0.281028	17.65	11.7067	13.82	16.41	22.72	12.35	14	8.77
Dennd2a	-0.644407	4.18111	4.13843	0.04192	0.26417	5.68333	3.78	4.62	5.17	7.26	4.15	3.32	3.87
Smad3	-0.644266	4.44165	4.11215	0.0425762	0.26674	5.96333	3.93333	4.77	6.49	6.63	4.69	4.23	2.88
Paqr7	-0.643341	3.61762	4.65416	0.0309783	0.216547	8.78333	5.91333	9.08	9.06	8.21	6.08	4.98	6.68
Mbtps1	-0.642979	7.41603	4.05156	0.0441304	0.272473	57.5	38.3533	47.43	64.35	60.72	43.11	45.74	26.21
P2ry6	-0.639645	4.44561	4.82318	0.0280796	0.202656	15.8067	10.53	14.79	16.35	16.28	11.75	10.38	9.46
Lyl1	-0.639468	3.08299	4.49314	0.034031	0.229882	6.83	4.28333	8.18	6.08	6.23	4.09	4.06	4.7
Tbcel	-0.63897	3.91908	4.65229	0.0310122	0.216547	4.30667	2.82667	4.21	4.51	4.2	3.06	3.22	2.2
Ehbp1l1	-0.638697	6.91178	4.03936	0.0444508	0.273289	43.1033	29.51	32.28	40.53	56.5	27.13	28.69	32.71
Fnbp1	-0.638185	4.21292	4.36392	0.0367078	0.241269	5.77667	3.86667	5.09	5.8	6.44	4.99	3.59	3.02
Mtmr3	-0.636175	5.80493	4.0594	0.0439262	0.27178	13.7433	9.26	11.86	16.39	12.98	9.21	11.71	6.86
Pofut1	-0.635901	5.54772	4.62373	0.0315327	0.218416	11.96	7.93	12.61	11.66	11.61	9.39	7.97	6.43
Jdp2	-0.635751	5.04275	4.26422	0.0389232	0.25102	31.48	20.9667	34.11	27.97	32.36	16.72	26.72	19.46
S1pr2	-0.634977	3.15244	4.1015	0.0428452	0.267577	4.69667	3.14	4.18	3.95	5.96	2.92	3.32	3.18
Spg20	-0.63395	6.1219	4.755	0.0292133	0.208579	27.5067	18.2867	26.98	29.18	26.36	20	20.06	14.8
Ctsf	-0.631571	7.14966	4.65572	0.0309503	0.216547	107.293	71.0733	103.9	97.63	120.35	70.32	66.6	76.3
Pcnx	-0.630835	5.00551	4.487	0.0341536	0.230239	3.54	2.36	3.11	3.84	3.67	2.54	2.54	2
S1pr4	-0.630031	3.88985	4.65867	0.0308972	0.216451	9.02667	5.94	8.49	9.1	9.49	6.44	6	5.38
Cadm1	-0.629416	5.21549	4.85097	0.0276306	0.200365	11.8633	7.92	11.65	11.65	12.29	8.37	7.93	7.46
Zmynd19	-0.629154	1.70386	4.13621	0.0419751	0.264228	4.29333	2.76333	4.32	3.84	4.72	2.64	3.07	2.58
Pkd2	-0.626393	6.30926	3.84375	0.0499317	0.294678	21.9033	14.6433	19.15	24.2	22.36	14.14	19.46	10.33
Wiz	-0.62561	4.18375	4.10903	0.0426547	0.267017	5.59333	3.53	5.41	4.79	6.58	4.08	3.84	2.67
Snta1	-0.624719	4.61695	4.06715	0.0437251	0.271331	17.1767	11.5367	14.86	16.48	20.19	9.34	13.23	12.04
Sav1	-0.623787	4.50612	4.34685	0.0370775	0.242691	13.3	8.61333	13.09	12.84	13.97	7.25	9.23	9.36
Ints1	-0.622034	3.80894	4.28303	0.0384947	0.249133	2.59333	1.73667	2.29	2.59	2.9	2.02	1.73	1.46
Nacc2	-0.620047	5.10898	4.35749	0.0368465	0.241722	7.53	5.06	7	6.72	8.87	5.13	5.47	4.58
Tmpo	-0.618607	8.24178	4.19742	0.0404855	0.258291	123.623	83.4433	118.17	137.91	114.79	82.37	102.62	65.34
Cdh5	-0.617764	7.54243	3.91264	0.0479244	0.286396	66.0933	44.4867	61.89	68.35	68.04	57.07	44.81	31.58
Tspan11	-0.616206	4.60122	4.41452	0.0356343	0.236051	8.13	5.47	7.86	8.74	7.79	6.05	4.75	5.61
Sod3	-0.615986	9.61259	4.26075	0.0390027	0.251265	561.52	374.907	540.86	519.16	624.54	362.78	332.5	429.44
Tm9sf3	-0.614488	8.3516	4.05997	0.0439113	0.27178	75.8333	51.48	79.46	80.29	67.75	50.27	65.11	39.06
Hip1	-0.611748	6.69732	3.89389	0.048462	0.288969	18.0733	12.23	14.64	19.24	20.34	14.56	12.98	9.15
Brap	-0.611675	5.55678	4.1695	0.0411578	0.2609	16.9233	10.8433	15.02	18.92	16.83	9.15	13.11	10.27
Nipal2	-0.611253	5.21824	4.49818	0.033931	0.22982	13.8667	9.19333	14.08	14.74	12.78	10.12	9.32	8.14
Ube2z	-0.610302	6.29996	4.27318	0.0387185	0.249942	29.1	19.7	28.57	29.18	29.55	19.43	23.57	16.1
Arid1b	-0.609421	4.55682	4.21487	0.0400711	0.256258	2.69333	1.81667	2.29	2.74	3.05	2.02	1.81	1.62
Ndrg4	-0.609369	5.60213	4.47464	0.0344014	0.231519	24.4367	16.5633	22.66	24.9	25.75	16.78	17.65	15.26
Stim1	-0.609175	6.34067	4.19415	0.0405636	0.258427	30.5967	20.74	29.01	30.16	32.62	23.52	22.98	15.72
Zbtb7c	-0.607679	3.74438	4.16276	0.041322	0.261547	3.94667	2.61667	4.02	3.7	4.12	2.68	3	2.17
Myo18a	-0.605854	5.60743	3.95936	0.0466113	0.281075	8.53667	5.64333	7.89	8.55	9.17	6.92	5.86	4.15
Stk40	-0.604834	5.6861	4.04386	0.0443324	0.272826	20.7433	14.1633	18.78	18.57	24.88	13.79	16.13	12.57
Rbms2	-0.60472	6.60248	3.96682	0.0464054	0.280802	24.88	16.86	24.37	26.19	24.08	20.28	18.34	11.96
Cdc42bpb	-0.601463	3.76961	4.2419	0.0394379	0.25291	2.67	1.81	2.43	2.76	2.82	1.95	1.66	1.82
Slc4a2	-0.600544	5.62145	3.94918	0.0468942	0.281744	15.91	10.8667	13.09	15.24	19.4	11.4	11.49	9.71
Dyrk1b	-0.599782	3.28001	4.08513	0.0432621	0.269648	6.50333	4.40333	6.81	5.9	6.8	4.77	4.6	3.84
Por	-0.599745	7.82876	4.30894	0.0379126	0.246373	128.967	88.0367	119.06	131.58	136.26	80.01	92.09	92.01
Sumf1	-0.599523	6.2218	4.29822	0.0381523	0.247502	42.74	29.1133	43.57	44.53	40.12	29.06	33.66	24.62
Gsk3a	-0.598656	5.26051	4.12006	0.0423775	0.265836	23.4333	15.67	22.08	21.97	26.25	14.2	17.99	14.82
R3hdm2	-0.596931	4.70655	4.3065	0.037967	0.2466	8.36667	5.53667	8.24	8.19	8.67	5.81	5.93	4.87
2900006K08Rik	-0.590799	2.93403	3.88517	0.0487142	0.289926	0.0433333	0.03	0.02	0.09	0.02	0	0.08	0.01
Cux1	-0.587826	6.33793	3.98344	0.0459496	0.278848	35.1767	25.0867	31.83	37.48	36.22	26.4	28.39	20.47
Def8	-0.579228	5.06249	3.85621	0.049562	0.293404	12.54	8.76667	12.29	12.8	12.53	9.29	10.06	6.95
Hfe	-0.578925	7.70401	4.02893	0.0447263	0.274184	178.88	123.54	199.5	182.35	154.79	133.8	121.23	115.59
Cuedc1	-0.570387	4.26082	3.96429	0.0464751	0.280802	7.94333	5.31667	7.63	7.95	8.25	5.35	5.31	5.29
Polr2b	-0.567526	7.41139	3.91361	0.0478966	0.286396	35.2133	30.59	37.12	38.01	30.51	35.52	34.98	21.27

## Sheet: GFPhigh.enriched
List of 1103 genes enriched (p-value <0.05 on EdgeR output) in GFPhigh FACS sorted MAECs. Data presented in Figure 1C.								Females	Females	Males	Females	Females	Males
Gene	logFC	logCPM	LR	PValue	FDR	GFPlow.average.FPKM	GFPhigh.average.FPKM	GFPlow.356	GFPlow.358	GFPlow.362	GFPhigh.357	GFPhigh.359	GFPhigh.363
Klrb1f	7.07418	2.5953	49.8433	1.66528e-12	3.10011e-10	0.0233333	8.09667	0.03	0.04	0	1.68	3.04	19.57
Duoxa2	6.08993	3.74127	46.9625	7.23576e-12	1.10358e-09	0.236667	20.9567	0.31	0.04	0.36	5.88	6.43	50.56
Nts	5.79576	6.54706	48.6266	3.09643e-12	5.15759e-10	3.31333	198.78	5.52	0.56	3.86	106.47	60.81	429.06
Tec	5.5852	4.08864	164.599	1.11928e-37	7.44606e-34	0.27	15.63	0.23	0.19	0.39	13.09	23.12	10.68
Otos	5.33493	-0.68934	31.0978	2.45355e-08	1.84741e-06	0.03	2.20667	0.07	0.02	0	0.35	0.51	5.76
Pdcd1	5.29086	1.32845	50.475	1.20693e-12	2.31492e-10	0.0433333	2.75333	0.08	0.01	0.04	0.94	1.46	5.86
Tmem178	5.21509	2.39683	123.953	8.62751e-29	2.73039e-25	0.173333	7.82	0.22	0.16	0.14	4.73	7.38	11.35
Htr2b	5.20015	5.93934	62.8507	2.22979e-15	9.10545e-13	1.78333	68.8367	1	0.52	3.83	47.38	75.69	83.44
Psg22	5.14321	-0.0401621	28.1138	1.14386e-07	7.0981e-06	0.00666667	1.23	0.02	0	0	0.06	1.11	2.52
Lrg1	5.13912	7.97256	40.2644	2.21817e-10	2.57613e-08	13.3767	479.45	4.9	3.22	32.01	211.41	472.91	754.03
Zg16	4.89745	-0.278435	34.4304	4.41767e-09	3.99452e-07	0.06	2.99667	0.09	0.02	0.07	0.49	1.41	7.09
Plac8	4.88921	3.03491	113.938	1.3442e-26	3.40323e-23	0.886667	35.4933	0.38	0.29	1.99	34.28	46.94	25.26
Ifitm6	4.79903	-0.951488	33.7839	6.15865e-09	5.23238e-07	0.0866667	1.60333	0.23	0.03	0	0.32	0.76	3.73
Alpl	4.76377	5.1807	164.5	1.17641e-37	7.44606e-34	1.23333	35.4433	1.3	1.3	1.1	25.56	41.36	39.41
Clca2	4.60233	4.21212	89.3431	3.31955e-21	3.50185e-18	0.0133333	0.0966667	0.03	0.01	0	0.11	0.13	0.05
Clca1	4.58971	6.7859	90.3624	1.98297e-21	2.51024e-18	2.87333	71.3433	3.22	2	3.4	39.43	56.48	118.12
Ptn	4.5338	5.41783	59.4405	1.26049e-14	4.09143e-12	1.2	27.4933	1.13	0.37	2.1	17.04	27.43	38.01
Dusp2	4.49957	3.28332	51.4491	7.34761e-13	1.55022e-10	0.646667	14.92	0.43	0.13	1.38	7.95	16.87	19.94
Gpr1	4.496	1.92659	50.7234	1.06345e-12	2.13686e-10	0.266667	5.71333	0.49	0.04	0.27	4.99	9.33	2.82
Ube2ql1	4.47933	-0.201291	26.2944	2.93144e-07	1.64929e-05	0.03	0.73	0.06	0.02	0.01	0.28	0.09	1.82
Samsn1	4.45241	1.06192	25.1843	5.21035e-07	2.68121e-05	0.126667	2.67333	0.2	0.01	0.17	1.12	1.05	5.85
Csf2rb2	4.42541	2.29174	62.5648	2.5782e-15	1.01992e-12	0.0633333	2.13667	0.04	0.02	0.13	2.33	3.49	0.59
Hdc	4.42296	4.52032	136.889	1.27549e-31	5.38214e-28	0.913333	22.98	0.84	0.65	1.25	21	30.38	17.56
Kcnk5	4.38806	2.65993	34.6865	3.87308e-09	3.55285e-07	0.17	4.30667	0.19	0.04	0.28	1.84	1.73	9.35
Masp1	4.37368	2.58159	47.4513	5.63885e-12	8.81262e-10	0.133333	4.2	0.11	0.13	0.16	4.3	7.57	0.73
Dleu7	4.3451	-1.00821	11.4034	0.000733089	0.0120993	0.00666667	0.85	0	0.02	0	0	0	2.55
Meox2	4.33576	4.8081	66.6254	3.28324e-16	1.53935e-13	1.39667	29.5367	0.96	0.92	2.31	20.03	51.43	17.15
Slc16a12	4.25373	2.86872	59.0519	1.53571e-14	4.74159e-12	0.206667	4.26	0.27	0.05	0.3	5.57	5.07	2.14
Gpr68	4.23759	1.49546	103.704	2.34916e-24	3.71725e-21	0.07	2.14	0.07	0.06	0.08	1.43	2.69	2.3
Il10ra	4.22648	0.501392	13.6602	0.000219054	0.00458347	0.0333333	0.96	0.07	0.03	0	0.37	2.51	0
Nog	4.20058	1.9943	70.6213	4.32827e-17	2.19167e-14	0.273333	5.06333	0.17	0.13	0.52	4.46	4.57	6.16
Lhx6	4.19963	3.70503	34.3013	4.72077e-09	4.12919e-07	0.466667	9.30333	0.16	0.09	1.15	9.14	12.97	5.8
Lrmp	4.17499	2.26382	100.355	1.2739e-23	1.79181e-20	0.186667	4.33667	0.2	0.1	0.26	3.6	6.13	3.28
Atp6v0d2	4.17239	4.71619	39.4051	3.44397e-10	3.85816e-08	1.31333	25.45	1.25	2.18	0.51	20.27	48.7	7.38
Gm10790	4.14685	0.240134	29.7314	4.96241e-08	3.39563e-06	0.06	0.966667	0.12	0.06	0	0.19	0.49	2.22
Dach2	4.12284	0.517989	52.2882	4.79242e-13	1.08334e-10	0.0266667	0.72	0.02	0.02	0.04	0.91	0.97	0.28
Ccl2	4.11333	0.798631	83.093	7.82829e-20	6.60655e-17	0.23	6.15333	0.12	0.52	0.05	6.8	7.08	4.58
Ednrb	4.11291	6.24367	33.0586	8.94236e-09	7.44745e-07	2.38667	44.01	2.39	0.26	4.51	42	36.7	53.33
4833423E24Rik	4.11012	-0.510895	49.7547	1.74217e-12	3.15059e-10	0.0133333	0.786667	0	0	0.04	1.19	0.86	0.31
Wnt2	4.10781	3.68017	55.9959	7.26214e-14	1.91524e-11	0.803333	14.68	0.55	0.46	1.4	7.69	11.22	25.13
Cyp1a1	4.09802	1.80657	35.5431	2.49465e-09	2.46666e-07	0.146667	3.06667	0.09	0.13	0.22	0.97	1.38	6.85
Tal2	4.09798	0.769741	72.3199	1.82993e-17	1.00718e-14	0.196667	3.88333	0.39	0.2	0	3.03	4.48	4.14
Pla2g7	4.06622	3.54205	87.8094	7.20767e-21	7.01861e-18	0.79	14.79	0.93	0.61	0.83	14.37	22.48	7.52
D630042P16Rik	3.95966	3.48323	104.905	1.28107e-24	2.31672e-21	0.576667	12.2033	0.85	0.44	0.44	8.94	13.79	13.88
Clca4	3.95924	1.77781	51.9255	5.76466e-13	1.28026e-10	0	0.01	0	0	0	0	0.01	0.02
Sh3gl3	3.95261	2.39322	17.6822	2.61055e-05	0.000792494	0.503333	7.51333	0.73	0.03	0.75	2.11	1.6	18.83
Rbp7	3.9147	3.96073	17.4001	3.02816e-05	0.000899848	4.67667	73.6033	3.97	0.49	9.57	30.42	11.72	178.67
Stc1	3.90604	5.8181	54.8919	1.27345e-13	3.16089e-11	2.21667	34.5833	1.6	0.93	4.12	23.64	41.68	38.43
Csf2rb	3.89349	3.30622	47.8798	4.53164e-12	7.35461e-10	0.263333	4.42	0.17	0.05	0.57	4.27	6.24	2.75
Cxcl17	3.87646	0.800707	27.9071	1.27283e-07	7.74652e-06	0.17	5.50333	0.4	0	0.11	2.77	1.62	12.12
Tll1	3.86688	3.29889	110.575	7.33116e-26	1.54675e-22	0.253333	4.00667	0.3	0.21	0.25	3.67	5.47	2.88
Cmah	3.86076	4.15013	89.6968	2.77603e-21	3.19471e-18	0.26	3.83667	0.24	0.23	0.31	2.42	3.47	5.62
Dtx1	3.85121	3.69783	17.552	2.7955e-05	0.000838583	0.5	7.61	0.24	0.04	1.22	2.56	2.99	17.28
Lbp	3.84386	6.53096	77.2714	1.49006e-18	1.04792e-15	5.75333	85.9433	5.54	2.86	8.86	75.55	102.07	80.21
Slc35f2	3.839	1.14025	59.16	1.45357e-14	4.60019e-12	0.106667	1.87667	0.15	0.01	0.16	1.78	1.33	2.52
Dusp26	3.83639	1.36684	79.7818	4.18129e-19	3.30818e-16	0.203333	3.48667	0.14	0.27	0.2	1.99	4.52	3.95
Lcn2	3.81509	4.77544	29.7893	4.8165e-08	3.33181e-06	5.98667	79.7833	4.94	2	11.02	34.02	40.36	164.97
Olr1	3.8092	3.15535	41.4783	1.19189e-10	1.49388e-08	0.336667	5.28333	0.2	0.52	0.29	6.5	8.16	1.19
Flrt3	3.7648	3.28646	60.3225	8.05199e-15	2.75487e-12	0.383333	5.58333	0.61	0.25	0.29	3.99	9.57	3.19
Pde2a	3.74344	5.67201	46.0609	1.14632e-11	1.63048e-09	1.99667	28.7667	1.73	0.83	3.43	22.68	49.09	14.53
Darc	3.73621	2.54587	16.1508	5.84928e-05	0.00154718	0.91	12.9933	0	0.25	2.48	10.81	24.39	3.78
Gjc2	3.7161	2.22023	19.6372	9.36268e-06	0.000324718	0.34	4.65	0.47	0.03	0.52	0.95	2.44	10.56
Sgpp2	3.65973	1.28651	50.8397	1.00227e-12	2.04642e-10	0.07	1.36	0.07	0.13	0.01	1.52	1.82	0.74
Ccl21a	3.65567	9.94129	13.2127	0.000278054	0.00558713	2.90667	0.0633333	0	2.77	5.95	0	0	0.19
Gm1987	3.65567	9.94129	13.2127	0.000278054	0.00558713	99.5	1307.63	119.53	0	178.97	718.19	349.5	2855.19
Fabp4	3.65298	8.31103	48.7182	2.95507e-12	4.98776e-10	111.64	1438.2	91.74	40.16	203.02	1142.29	1855.53	1316.78
Il31ra	3.65248	1.70081	26.057	3.31478e-07	1.80954e-05	0.113333	1.97	0.12	0.04	0.18	2.61	3.07	0.23
Lpar3	3.65219	-0.109836	58.7055	1.83133e-14	5.39135e-12	0.06	0.866667	0.03	0.08	0.07	0.47	1.1	1.03
Ccl21b	3.63705	10.3666	12.7402	0.000357872	0.00678473	0.346667	0	0	1.04	0	0	0	0
Ccl21c	3.63645	10.3672	12.7339	0.000359094	0.00678473	13.7	168.607	16.71	0	24.39	90.56	33.36	381.9
Gm10591	3.63645	10.3672	12.7339	0.000359094	0.00678473	13.7	168.607	16.71	0	24.39	90.56	33.36	381.9
Gm13304	3.63645	10.3672	12.7339	0.000359094	0.00678473	13.7	168.607	16.71	0	24.39	90.56	33.36	381.9
Rhpn1	3.63353	0.230192	27.507	1.56525e-07	9.43547e-06	0.0266667	0.99	0.05	0	0.03	0.23	0.66	2.08
Lrrn4cl	3.6126	3.90407	29.7947	4.80295e-08	3.33181e-06	1.04333	13.22	1.07	0.69	1.37	6.78	3.38	29.5
Dlk1	3.61199	0.942608	45.2688	1.71763e-11	2.36342e-09	0.0666667	0.97	0.1	0.03	0.07	0.5	1.89	0.52
Hoxd10	3.578	2.31026	35.4362	2.63538e-09	2.50836e-07	0.476667	6.52667	0.36	0.33	0.74	3.25	3.07	13.26
Sybu	3.57346	3.21067	78.0046	1.028e-18	7.65499e-16	0.58	6.88	0.83	0.3	0.61	6.49	8.91	5.24
Maf	3.56505	2.75467	25.3982	4.66347e-07	2.45978e-05	0.34	4.05333	0.41	0.13	0.48	2.07	1.11	8.98
Tmem108	3.54924	2.34365	42.4324	7.3166e-11	9.45111e-09	0.23	2.75333	0.13	0.08	0.48	1.9	2.31	4.05
Nrp2	3.54743	4.02723	48.3126	3.63418e-12	5.97469e-10	0.516667	6.54667	0.55	0.14	0.86	6.87	7.97	4.8
Pard6g	3.5414	5.22514	21.4391	3.65243e-06	0.000145855	2.31	27.3633	2.8	0.36	3.77	11.27	13.46	57.36
Tmem100	3.52622	4.35996	49.8033	1.69955e-12	3.11806e-10	2.39333	27.8133	2.98	1.78	2.42	17.59	14.87	50.98
Mmrn1	3.51707	8.24137	15.364	8.86631e-05	0.00218789	12.81	148.29	16.93	0.4	21.1	94.8	83.84	266.23
8430408G22Rik	3.48638	5.90483	33.9273	5.72113e-09	4.92679e-07	9.82333	112.287	7.51	4.52	17.44	48.42	84.59	203.85
Duoxa1	3.46473	-0.791326	25.9241	3.55106e-07	1.92931e-05	0.0433333	0.4	0.06	0.02	0.05	0.11	0.07	1.02
Prox1	3.46405	3.55629	31.8577	1.65887e-08	1.32073e-06	0.536667	5.88	0.53	0.08	1	5.14	4.95	7.55
4930578C19Rik	3.45953	2.00002	76.8323	1.86105e-18	1.23995e-15	0.393333	3.93	0.54	0.23	0.41	3.1	4.53	4.16
Duox2	3.45047	2.06105	87.6012	8.00762e-21	7.2406e-18	0.113333	1.66333	0.15	0.03	0.16	1.68	1.62	1.69
Gatm	3.44401	2.36845	50.6594	1.09868e-12	2.17316e-10	0.426667	4.96333	0.38	0.17	0.73	3.14	5.55	6.2
Rasgrp3	3.43708	3.57253	44.7313	2.26012e-11	3.07644e-09	0.443333	5.39	0.51	0.1	0.72	4.59	5.59	5.99
Ifi27l2a	3.39182	5.58305	40.5455	1.92088e-10	2.27257e-08	34.5067	356.483	42.34	25.76	35.42	234.7	146.47	688.28
Btnl9	3.3909	3.47513	17.3408	3.1241e-05	0.000926181	0.883333	9.18333	1.02	0.05	1.58	3.3	4.05	20.2
Rab3il1	3.39085	4.85642	50.5643	1.15325e-12	2.24601e-10	2.53667	27.85	2.55	1.97	3.09	11.87	25.85	45.83
Oxtr	3.3875	1.39331	65.3026	6.4237e-16	2.9042e-13	0.106667	1.26	0.1	0.12	0.1	0.81	1.94	1.03
Wdr72	3.38407	-0.0567794	43.3441	4.59113e-11	6.11781e-09	0.01	0.39	0.01	0.02	0	0.41	0.52	0.24
Ncam2	3.37973	0.0515103	47.4992	5.50266e-12	8.70727e-10	0.0233333	0.46	0.02	0.03	0.02	0.55	0.6	0.23
Rgs16	3.37779	2.86049	30.4172	3.48419e-08	2.50604e-06	0.64	7.16	0.13	0.3	1.49	4.3	7.09	10.09
Ngf	3.37522	1.15254	25.1033	5.4341e-07	2.76156e-05	0.533333	5.18667	0.81	0.32	0.47	1.6	2.28	11.68
Thy1	3.36977	1.85709	28.7567	8.20675e-08	5.35512e-06	0.376667	4.27667	0.52	0.17	0.44	2.3	1.48	9.05
Fam180a	3.34982	2.38814	26.3839	2.79862e-07	1.58869e-05	0.753333	8.2	0.9	0.8	0.56	2.59	3.27	18.74
Gpr126	3.345	3.91114	35.2456	2.9064e-09	2.72534e-07	0.453333	5.08	0.46	0.28	0.62	4.84	9.09	1.31
Nell1	3.32412	0.95682	26.5933	2.51111e-07	1.4319e-05	0.106667	1.51333	0.21	0.11	0	1.06	2.45	1.03
Irf8	3.322	2.8371	58.4265	2.11027e-14	6.07135e-12	0.52	5.60333	0.25	0.62	0.69	3.84	4.99	7.98
Cd36	3.30779	7.6334	29.6453	5.18789e-08	3.51195e-06	12.6533	128.397	10.43	3.04	24.49	83.57	184.41	117.21
Prg2	3.28976	-0.376382	37.9825	7.13835e-10	7.59365e-08	0.0833333	2.25	0	0	0.25	1.1	2.27	3.38
Comp	3.28217	4.55242	46.3492	9.89477e-12	1.43975e-09	2.12667	21.4233	1.91	0.87	3.6	14.48	29.57	20.22
Slc6a4	3.25524	0.0626926	60.3665	7.87423e-15	2.75487e-12	0.06	0.813333	0.06	0.04	0.08	0.51	1.16	0.77
Susd4	3.24547	1.39887	20.8282	5.02379e-06	0.000189274	0.18	2.55	0.18	0.02	0.34	0.79	1.42	5.44
Igfbp5	3.22927	7.03353	38.1296	6.61997e-10	7.10188e-08	4.99667	46.7767	5.62	1.98	7.39	35.42	29.48	75.43
Apba2	3.22719	1.64327	20.7613	5.20239e-06	0.000194843	0.173333	1.88	0.15	0.02	0.35	0.53	0.78	4.33
Gap43	3.22621	3.23719	63.7021	1.4473e-15	6.31769e-13	1.56667	16.44	1.72	1.17	1.81	11.25	14.24	23.83
Slc6a6	3.2108	6.00771	76.2268	2.52884e-18	1.60063e-15	2.30333	22.3033	2.55	2.01	2.35	22.72	30.61	13.58
Sh3bgrl2	3.19613	3.47738	63.3732	1.71032e-15	7.21697e-13	0.713333	6.94667	0.81	0.47	0.86	6.4	10.05	4.39
Hist2h2bb	3.18366	0.859572	57.0933	4.15622e-14	1.16919e-11	0.54	3.74	1.09	0.25	0.28	2.43	4.81	3.98
Nr2f2	3.18322	4.47241	47.0992	6.74824e-12	1.04178e-09	1.18667	10.8033	1.52	0.44	1.6	7.5	13.46	11.45
Hmgcll1	3.17935	0.0600166	10.75	0.00104278	0.0162369	0.05	0.606667	0.04	0.02	0.09	0.4	1.42	0
Emid1	3.12434	2.90652	19.3226	1.10394e-05	0.000376678	0.753333	7.82	0.65	0.24	1.37	3.5	2.55	17.41
Apold1	3.12263	5.35017	49.1436	2.37895e-12	4.0696e-10	2.99667	27.15	3.02	1.32	4.65	21.65	26.75	33.05
Hapln1	3.11791	1.31819	55.832	7.89379e-14	2.03934e-11	0.12	1.06667	0.2	0.1	0.06	0.9	1.51	0.79
Cd5	3.10203	0.223642	23.5541	1.21448e-06	5.55021e-05	0.07	0.956667	0	0.04	0.17	0.57	0.24	2.06
Meox1	3.07549	4.2567	27.0815	1.95054e-07	1.15382e-05	2.3	19.5767	2.26	1.41	3.23	7.18	11.19	40.36
Npl	3.0742	0.306093	26.1947	3.08664e-07	1.72131e-05	0.22	2.03333	0.27	0.13	0.26	1.21	0.69	4.2
Wnt9b	3.05869	3.44321	25.3404	4.80543e-07	2.50337e-05	0.613333	5.24	0.38	0.14	1.32	7.59	3.86	4.27
Ank3	2.9819	2.29927	43.0293	5.39268e-11	7.11104e-09	0.106667	1.31	0.11	0.07	0.14	0.75	0.78	2.4
Gpr160	2.9755	1.621	14.4964	0.000140425	0.00317436	0.41	3.37333	0.64	0.07	0.52	2.16	0.72	7.24
Nfatc2	2.97394	1.75397	68.0123	1.62483e-16	7.91104e-14	0.12	1.04667	0.14	0.14	0.08	0.9	1.19	1.05
Grb7	2.95687	0.895042	56.2754	6.29986e-14	1.69681e-11	0.126667	1.62	0.11	0.07	0.2	1.15	1.39	2.32
Gpr97	2.95384	4.89084	21.7534	3.10045e-06	0.000126609	3.23667	25.44	3.67	1.19	4.85	12.73	9.35	54.24
Cyfip2	2.95188	2.19208	47.7773	4.7748e-12	7.65117e-10	0.126667	1.45	0.09	0.08	0.21	0.86	1.11	2.38
Gmfg	2.95104	1.66307	18.1652	2.0255e-05	0.000641021	0.82	7.18667	1.15	0.39	0.92	2.85	1.88	16.83
Ttyh1	2.93585	3.16527	36.0072	1.96593e-09	1.96104e-07	0.446667	4.55667	0.52	0.23	0.59	3.01	2.13	8.53
BC028528	2.93123	3.38832	39.8107	2.79812e-10	3.19112e-08	5.07333	42.05	6.13	2.64	6.45	24.5	30.18	71.47
Il33	2.92498	6.11007	58.8258	1.72269e-14	5.19226e-12	7.88667	61.3933	9.11	7.29	7.26	36	62.97	85.21
Ablim2	2.92149	3.66712	25.8912	3.61217e-07	1.94581e-05	0.873333	6.86	0.61	0.87	1.14	2.55	3.43	14.6
Hist1h2bm	2.91483	2.38556	60.5592	7.13982e-15	2.58237e-12	0.726667	18.0233	0.38	0.98	0.82	11.77	23.36	18.94
Adamtsl1	2.89717	3.49782	37.3577	9.83321e-10	1.02875e-07	0.316667	2.6	0.28	0.12	0.55	2.78	1.49	3.53
Epor	2.87389	0.595971	31.4377	2.05946e-08	1.58968e-06	0.16	1.67333	0.11	0.09	0.28	0.83	1.04	3.15
B3gnt7	2.86934	1.15339	19.9743	7.84896e-06	0.000279887	0.256667	1.82	0.26	0.29	0.22	0.66	0.7	4.1
Ch25h	2.86403	4.20633	74.3286	6.61399e-18	3.80575e-15	4.37667	32.81	4.43	4.24	4.46	25.36	38.26	34.81
Cd300lg	2.85076	4.17701	17.0506	3.63962e-05	0.0010377	2.14333	15.83	1.92	0.26	4.25	9.51	9.93	28.05
Tcf15	2.83334	1.68131	15.1387	9.98935e-05	0.00239046	1.10667	8.64667	0.71	0.11	2.5	4.32	8.01	13.61
Il17ra	2.83167	2.87589	53.5415	2.53184e-13	6.04727e-11	0.483333	3.81333	0.37	0.32	0.76	3.43	3.35	4.66
Dkk2	2.78939	4.8534	75.5712	3.52466e-18	2.1247e-15	2.44667	17.1533	3	2.28	2.06	17.63	19.14	14.69
Lepr	2.78082	4.80671	34.308	4.7045e-09	4.12919e-07	1.55	11.2967	2.13	0.76	1.76	9.2	18.61	6.08
Kdr	2.7742	5.71066	42.7426	6.24391e-11	8.14862e-09	2.56667	18.95	2.7	1.17	3.83	17.9	24.07	14.88
Adarb2	2.77246	0.18892	10.4245	0.00124357	0.0186742	0.04	0.336667	0.07	0.05	0	0.31	0.68	0.02
Pglyrp1	2.76782	3.14336	45.5447	1.49194e-11	2.0985e-09	4.81333	33.1467	5.09	4.17	5.18	20.79	25.6	53.05
Reln	2.75684	3.89389	16.7037	4.3695e-05	0.00121036	0.326667	2.46	0.33	0.02	0.63	1.52	1.12	4.74
Gprc5c	2.75385	2.85336	61.7281	3.94306e-15	1.51258e-12	0.47	4.83667	0.59	0.25	0.57	4.95	5.65	3.91
Kbtbd11	2.74671	1.90706	30.3534	3.60082e-08	2.56083e-06	0.133333	1.04	0.14	0.09	0.17	0.59	0.64	1.89
Gpr30	2.74474	4.27833	60.9303	5.91311e-15	2.20159e-12	2.47	17.0233	2.82	2.36	2.23	11.56	21.03	18.48
Glt25d2	2.7428	1.27347	36.0732	1.90043e-09	1.9246e-07	0.143333	1.17	0.08	0.09	0.26	0.73	0.91	1.87
Gpihbp1	2.72878	4.99165	9.56336	0.00198499	0.0275225	14.1333	93.4333	13.05	0.81	28.54	57.12	30.16	193.02
Ccl5	2.70986	2.22999	46.3657	9.81164e-12	1.43975e-09	3.08	21.6067	1.4	4.12	3.72	21.65	17.42	25.75
Gchfr	2.70977	0.816327	20.1549	7.14165e-06	0.000256836	1.09333	7.58667	1.33	1.05	0.9	2.9	3.18	16.68
Arhgap42	2.7082	2.76103	49.5298	1.95379e-12	3.43515e-10	0.283333	2.07667	0.25	0.38	0.22	1.56	2.29	2.38
Fndc8	2.70186	-0.250678	9.6709	0.0018721	0.0261866	0.0533333	0.78	0.1	0.06	0	0.22	0.15	1.97
Slc10a6	2.69985	4.93311	31.7753	1.73078e-08	1.36086e-06	4.68333	30.68	4.07	4.26	5.72	12.94	24.68	54.42
Lyve1	2.69659	6.96716	19.9451	7.96977e-06	0.000283397	15.3367	103.1	19.82	3.13	23.06	76.33	67.24	165.73
Slc38a4	2.67975	2.42586	26.7739	2.28711e-07	1.31603e-05	0.47	2.87667	0.58	0.16	0.67	1.86	2.01	4.76
1700025G04Rik	2.67222	2.88627	28.4346	9.6919e-08	6.13449e-06	0.233333	1.45333	0.28	0.17	0.25	0.74	0.86	2.76
Pde9a	2.66215	4.24784	53.8091	2.20947e-13	5.37879e-11	2.88333	19.4267	2.77	2.75	3.13	15.67	28.63	13.98
Fam167b	2.63543	0.839742	35.3895	2.69943e-09	2.55016e-07	0.746667	4.29333	0.6	0.67	0.97	3.82	6.87	2.19
Adrb2	2.63381	3.6524	60.2129	8.51321e-15	2.83602e-12	2.06	13.0133	1.98	1.82	2.38	9.96	13.65	15.43
Clca5	2.62782	0.402345	24.198	8.69209e-07	4.0753e-05	0.0933333	0.616667	0.08	0.02	0.18	0.25	0.47	1.13
Egln3	2.62696	1.89222	40.8263	1.66376e-10	1.98693e-08	0.446667	2.91333	0.41	0.27	0.66	1.98	4.09	2.67
Flrt2	2.6136	3.11714	52.9047	3.50138e-13	8.05891e-11	0.393333	2.53	0.38	0.36	0.44	2.77	3.21	1.61
Gm11837	2.60519	1.30644	13.2405	0.000273963	0.00554009	1.05	6.50333	1.48	0.63	1.04	1.04	2.61	15.86
Gng2	2.60283	1.61483	18.0072	2.20067e-05	0.000689562	0.27	1.73333	0.19	0.09	0.53	0.81	1.14	3.25
Ucp2	2.57784	5.44207	26.3595	2.83424e-07	1.60173e-05	3.51333	21.6567	3.22	1.83	5.49	12.74	14.61	37.62
Ephx3	2.55705	0.00954428	21.399	3.72965e-06	0.000147143	0.103333	0.436667	0.02	0.04	0.25	0.19	0.2	0.92
Ralgps2	2.55645	2.46651	36.4456	1.56985e-09	1.60264e-07	0.253333	1.48	0.38	0.15	0.23	0.96	1.22	2.26
C920021L13Rik	2.54636	3.03358	33.2193	8.23305e-09	6.90213e-07	0.143333	0.28	0.19	0.14	0.1	0.28	0.23	0.33
4933436C20Rik	2.54126	0.0886856	24.4237	7.73137e-07	3.70725e-05	0.193333	1.10333	0.28	0.12	0.18	0.27	1.6	1.44
Bean1	2.53174	4.27474	42.3929	7.46605e-11	9.54675e-09	2.14667	12.79	2.15	2.16	2.13	6.58	16.22	15.57
Pcsk6	2.52723	2.38158	11.2777	0.000784419	0.0127963	0.403333	2.40667	0.37	0.12	0.72	0.91	0.55	5.76
Lgals3	2.52162	3.74524	39.944	2.61344e-10	3.00759e-08	3.70667	22.1667	4.71	2	4.41	15.79	22.08	28.63
Ccbp2	2.52011	3.44597	14.3905	0.00014855	0.00332242	1.39333	7.85	1.4	0.25	2.53	5.46	3.68	14.41
Ubash3b	2.51734	1.20497	41.7219	1.05225e-10	1.33205e-08	0.213333	1.38667	0.18	0.16	0.3	1.28	0.97	1.91
Nsg1	2.51595	5.64439	16.419	5.07724e-05	0.00137042	7.89333	49.1267	7.36	6.02	10.3	19.45	16.33	111.6
Pappa2	2.51342	0.449741	15.3219	9.06592e-05	0.00221533	0.0366667	0.316667	0.07	0.03	0.01	0.24	0.64	0.07
Pdpn	2.50175	2.55195	14.5731	0.000134825	0.00306417	1.23667	7.00333	1.71	0.26	1.74	5.43	2.48	13.1
Bok	2.49023	4.651	45.2835	1.70476e-11	2.36342e-09	6.86667	39.65	6.99	4.98	8.63	27.33	39.91	51.71
Enpp2	2.47621	4.94484	38.7081	4.92164e-10	5.37095e-08	3.44	20.0033	5.09	2.22	3.01	20.06	27.11	12.84
Galntl4	2.4756	5.63228	25.0963	5.45375e-07	2.76156e-05	6.71	37.6467	6.62	4.58	8.93	20.35	22.09	70.5
Chst8	2.47129	0.500491	22.0205	2.69748e-06	0.000111229	0.173333	1.20333	0.23	0.23	0.06	0.5	2.3	0.81
Fam174b	2.4594	6.56052	56.5743	5.41155e-14	1.48923e-11	13.1267	75.0433	14.3	12.8	12.28	60.12	99.22	65.79
Slc45a3	2.45518	5.75075	13.108	0.000294036	0.00577981	6.02	34.02	3.75	3.47	10.84	12.15	12.49	77.42
Robo4	2.45102	5.11875	41.3349	1.28257e-10	1.59177e-08	3.28667	18.2833	2.31	2.76	4.79	13.23	22.88	18.74
Slc27a2	2.44485	-0.654555	9.37604	0.0021984	0.0300861	0.0866667	0.586667	0.09	0.13	0.04	0.49	1.27	0
Adamts9	2.44137	1.88473	32.766	1.03947e-08	8.54458e-07	0.196667	1.16	0.15	0.08	0.36	1.32	1.19	0.97
Spp1	2.44019	4.21673	21.1833	4.17381e-06	0.000161086	5.39667	30.0233	4.19	4.64	7.36	7.7	42.66	39.71
Fam65c	2.4356	0.0314394	22.7681	1.82775e-06	7.95101e-05	0.0466667	0.586667	0.03	0.02	0.09	0.23	0.5	1.03
Hapln3	2.43493	0.97697	32.008	1.53538e-08	1.23015e-06	0.513333	2.81	0.35	0.46	0.73	1.78	4.54	2.11
Agr2	2.43486	2.5613	49.5589	1.92502e-12	3.43222e-10	3.39333	20.2933	3.47	3.76	2.95	15.44	26.94	18.5
Ebf3	2.41441	0.0804027	29.1061	6.85226e-08	4.56156e-06	0.04	0.326667	0.02	0.05	0.05	0.22	0.53	0.23
Prss23	2.41416	8.27865	30.6413	3.10417e-08	2.27142e-06	37.3267	204.003	47.02	26.43	38.53	107.76	174.62	329.63
Igfbp6	2.40761	4.06747	19.2795	1.12911e-05	0.0003832	5.45333	29.8	3.78	5.23	7.35	12.88	15.6	60.92
Hist1h2bb	2.4015	2.80462	40.9433	1.5671e-10	1.90749e-08	0.673333	19.58	0.6	0.41	1.01	9.7	26.04	23
Col13a1	2.39545	0.0547143	34.0832	5.28063e-09	4.57859e-07	0.0533333	0.433333	0.04	0.04	0.08	0.22	0.45	0.63
Ncf2	2.39415	1.7329	18.1876	2.00175e-05	0.000635091	0.406667	2.39333	0.53	0.18	0.51	1.56	0.8	4.82
Renbp	2.39382	3.06458	28.539	9.18307e-08	5.87113e-06	2.35	12.6633	2.06	1.78	3.21	6.53	10.27	21.19
Itga6	2.38993	4.51481	33.6842	6.48264e-09	5.47091e-07	1.94333	10.7333	1.81	1.28	2.74	9.29	16.24	6.67
Laptm5	2.38627	2.42211	25.7914	3.8038e-07	2.03174e-05	0.513333	3.15	0.72	0.24	0.58	2.42	4.22	2.81
Slfn3	2.38567	3.4915	53.0875	3.19021e-13	7.47868e-11	1.73333	10.25	1.41	2.45	1.34	9.78	11.13	9.84
Cyp7b1	2.38353	0.575868	21.3982	3.73118e-06	0.000147143	0.23	1.35667	0.37	0.15	0.17	1.3	2.33	0.44
Stc2	2.38297	0.832427	40.8501	1.64362e-10	1.98158e-08	0.373333	2.09	0.5	0.21	0.41	1.87	2.14	2.26
Pvrl2	2.35595	5.29174	17.7025	2.58292e-05	0.000785989	7.13	37.0967	7.07	4.95	9.37	15.51	17.74	78.04
Ntng1	2.35099	-0.229394	16.3337	5.31124e-05	0.00142679	0.06	0.38	0.11	0.02	0.05	0.16	0.6	0.38
Ccl7	2.34862	-0.876379	6.5141	0.0107023	0.103262	0.2	1.70667	0.25	0.24	0.11	0.88	0	4.24
Gpr182	2.33561	4.9356	36.0057	1.96739e-09	1.96104e-07	7.52667	39.53	7.46	6.7	8.42	22.02	38.7	57.87
Pparg	2.33354	2.76732	14.2651	0.000158786	0.00346564	1.50667	7.53667	1.87	0.33	2.32	3.89	4.12	14.6
Dnahc6	2.33229	2.17019	27.0973	1.93464e-07	1.14979e-05	0.0666667	0.54	0.06	0.08	0.06	0.23	0.51	0.88
Samd5	2.32127	3.12352	36.7415	1.34874e-09	1.38811e-07	1.41667	7.29667	1.5	1.1	1.65	7.45	10.47	3.97
Robo2	2.31071	1.23966	7.40749	0.00649531	0.0716862	0.0866667	0.483333	0.16	0.04	0.06	0.82	0.63	0
Marcksl1	2.30817	4.48947	35.5147	2.53133e-09	2.46666e-07	6.11	30.6633	6.34	4.99	7	21.96	24.23	45.8
Cmbl	2.30687	0.672319	28.5426	9.16573e-08	5.87113e-06	0.606667	3.39	0.44	0.71	0.67	1.5	3.63	5.04
Slfn2	2.30584	6.03613	51.6794	6.53463e-13	1.40207e-10	16.74	83.9133	13.81	15.87	20.54	78.38	89.11	84.25
Atp8a2	2.29253	2.29219	17.734	2.54044e-05	0.000774926	0.24	1.19333	0.23	0.17	0.32	0.7	0.39	2.49
Necab1	2.28178	1.18548	14.6505	0.000129403	0.00296223	0.0466667	0.146667	0.02	0.11	0.01	0.11	0.15	0.18
Ephx4	2.2702	0.855971	35.5027	2.54703e-09	2.46666e-07	0.613333	3.12667	0.9	0.53	0.41	2.27	3.42	3.69
Gm1673	2.25814	1.36043	15.3184	9.08252e-05	0.00221533	2.78333	12.23	2.37	1.72	4.26	5.31	5.79	25.59
Lypd1	2.25788	1.9115	30.301	3.69938e-08	2.61623e-06	0.0833333	2.37667	0.07	0.07	0.11	1.01	2.14	3.98
Nostrin	2.25177	3.10999	35.4642	2.59783e-09	2.49135e-07	1.93333	9.75667	2.54	1.56	1.7	11.9	11.83	5.54
Ccdc48	2.24559	1.62554	13.1762	0.000283531	0.00567854	0.416667	2.00333	0.39	0.21	0.65	0.72	0.8	4.49
Ston2	2.24127	2.01776	24.9747	5.80861e-07	2.90637e-05	0.14	0.7	0.17	0.12	0.13	0.6	0.35	1.15
Trpc3	2.23826	0.879162	12.7297	0.000359899	0.00678981	0.186667	0.913333	0.23	0.04	0.29	0.24	0.9	1.6
Trp53i11	2.23577	5.33295	41.3096	1.29931e-10	1.59689e-08	6.30333	30.6333	6.8	4.05	8.06	30.26	28.12	33.52
Kcnc2	2.23569	1.64614	13.5849	0.000228018	0.0047397	0.173333	0.966667	0.15	0.28	0.09	0.92	1.8	0.18
Mbnl3	2.23306	0.708698	34.2976	4.7297e-09	4.12919e-07	0.0733333	0.37	0.05	0.07	0.1	0.28	0.48	0.35
Nppc	2.23125	0.824062	15.6063	7.7994e-05	0.00196679	0.59	3.71667	0.65	0.64	0.48	2.95	0.99	7.21
Pcdhb9	2.22734	2.29536	32.1255	1.4453e-08	1.16536e-06	0.656667	3.28333	0.58	0.7	0.69	2.01	2.86	4.98
Adamts18	2.2096	-0.334065	15.6461	7.63685e-05	0.00193737	0.03	0.273333	0.04	0.02	0.03	0.21	0.53	0.08
Adm	2.19912	3.3631	14.6324	0.000130652	0.00298004	3.25667	15.3033	3.7	1.57	4.5	6.39	8.37	31.15
Dclk1	2.19241	3.00438	32.7316	1.05805e-08	8.6412e-07	0.503333	2.51	0.67	0.51	0.33	3.06	3.11	1.36
Il7	2.19062	4.43134	21.0006	4.5915e-06	0.000174546	3.74667	17.1733	4.78	3.6	2.86	9.81	9.85	31.86
Tnfaip8l1	2.18936	4.26859	24.0697	9.29102e-07	4.32408e-05	3.59333	16.7233	3.49	2.57	4.72	10.05	11.31	28.81
Nrcam	2.18767	0.812227	28.9284	7.51032e-08	4.95173e-06	0.0633333	0.413333	0.09	0.05	0.05	0.5	0.33	0.41
Fxyd6	2.18539	7.28974	23.798	1.06991e-06	4.90724e-05	38.87	178.477	45.92	39.83	30.86	108.97	108.83	317.63
Prkar1b	2.18321	0.733835	10.6704	0.00108862	0.016806	0.243333	1.26667	0.25	0.25	0.23	0.38	0.35	3.07
Nrxn2	2.18068	1.82934	13.1166	0.000292697	0.00576512	0.15	0.613333	0.14	0.19	0.12	0.16	0.32	1.36
Steap4	2.17728	3.35685	24.1996	8.68518e-07	4.0753e-05	1.41333	6.74667	0.96	1.04	2.24	4.03	7.11	9.1
Rasd1	2.1658	4.62122	35.1	3.13206e-09	2.89407e-07	6.82333	32.2467	6.31	6.45	7.71	21.92	28.71	46.11
Lypd6	2.16322	-0.048058	10.9999	0.000911181	0.0145824	0.0933333	0.54	0.1	0.12	0.06	0.32	0.09	1.21
Gngt2	2.15927	6.68063	29.2383	6.40024e-08	4.2868e-06	102.277	471.293	98.02	89.54	119.27	332.66	330.24	750.98
Gpr77	2.15638	0.590477	32.6299	1.11486e-08	9.0468e-07	0.133333	0.75	0.12	0.19	0.09	0.72	0.73	0.8
Rem1	2.15356	2.49845	30.5823	3.20007e-08	2.32815e-06	1.44	6.32333	2.27	0.94	1.11	3.96	6.33	8.68
Scn3a	2.12351	1.60296	25.0804	5.4989e-07	2.77333e-05	0.0966667	0.5	0.15	0.04	0.1	0.71	0.44	0.35
Sema3a	2.12261	3.2523	22.2214	2.4295e-06	0.00010286	0.613333	2.77	0.84	0.25	0.75	2.48	1.78	4.05
Slc26a10	2.12041	0.320132	12.9598	0.000318248	0.00619801	0.14	0.803333	0.07	0	0.35	0.7	0.32	1.39
1700026J04Rik	2.11486	1.76823	26.244	3.00895e-07	1.68541e-05	0.533333	2.47	0.84	0.25	0.51	2.06	3.41	1.94
Ppm1j	2.10788	1.52783	27.1368	1.89557e-07	1.13189e-05	0.7	3.11667	0.71	0.39	1	2.26	2.48	4.61
Upp1	2.1076	4.19945	46.925	7.37569e-12	1.10934e-09	7.01333	31.7933	7.71	6.33	7	28.79	37.31	29.28
Pcdh1	2.10476	1.89296	28.3254	1.02542e-07	6.45809e-06	0.423333	1.83667	0.33	0.29	0.65	1.38	2.4	1.73
Asns	2.09298	1.92687	17.1138	3.5206e-05	0.00100831	0.916667	4.06	0.86	0.26	1.63	3.09	4.54	4.55
Tslp	2.09269	2.09397	19.9286	8.03888e-06	0.000285054	1.96	8.19333	2.15	2.93	0.8	9.43	11.06	4.09
Hoxd9	2.08493	2.37467	15.8183	6.97265e-05	0.00179452	1.16667	4.91667	1.12	1.03	1.35	1.95	3	9.8
Fmnl2	2.07996	3.07231	20.9757	4.65142e-06	0.000176294	0.626667	2.73333	0.61	0.56	0.71	1.32	1.97	4.91
Gpm6a	2.07973	7.38314	43.4617	4.32329e-11	5.82219e-09	23.2967	100.97	25.91	22.68	21.3	78.58	117.88	106.45
Mfsd7c	2.07753	1.01624	34.3083	4.70381e-09	4.12919e-07	0.24	1.07	0.38	0.13	0.21	0.91	1.15	1.15
Hist3h2ba	2.07447	0.0973678	22.205	2.45033e-06	0.000103052	0.943333	2.50667	1.25	0.68	0.9	1.57	4.1	1.85
Lhfpl2	2.03844	3.53584	35.1849	2.99839e-09	2.79093e-07	1.25333	5.20333	1.41	1	1.35	3.67	5.98	5.96
Slfn4	2.03233	0.499564	28.7867	8.08041e-08	5.3e-06	0.0633333	0.13	0.11	0.08	0	0.18	0.21	0
Heatr8	2.03216	0.24493	24.3391	8.07846e-07	3.84456e-05	0.08	0.476667	0.12	0.08	0.04	0.36	0.45	0.62
Anxa8	2.0231	0.993309	13.1546	0.000286814	0.00570937	0.383333	2.14	0.32	0.13	0.7	0.95	1.03	4.44
Mme	2.02273	1.97018	6.81589	0.00903505	0.0917199	0.403333	1.71	0.4	0.44	0.37	1.97	3.11	0.05
Cxcl5	2.00592	0.0211798	18.6359	1.58209e-05	0.00051353	0.263333	1.24667	0.32	0.19	0.28	1.64	1.62	0.48
Prkcq	2.00537	3.03812	14.3301	0.000153396	0.00338299	1.18	4.69	1	0.9	1.64	2.92	1.9	9.25
Nrgn	2.00274	1.52933	24.6753	6.78467e-07	3.3161e-05	0.833333	3.81333	0.63	0.5	1.37	3.06	3.48	4.9
Ramp3	1.99742	2.03571	20.345	6.46602e-06	0.00023657	1.76	6.99333	1.65	1.98	1.65	3.65	4.8	12.53
Ankrd6	1.99519	1.08124	24.3881	7.87556e-07	3.76214e-05	0.19	0.85	0.15	0.2	0.22	0.62	0.58	1.35
Lyn	1.99423	4.72829	38.9263	4.40112e-10	4.84468e-08	3.52333	14.8433	3.37	3.27	3.93	12.22	14.51	17.8
Lrrc33	1.99402	3.82262	31.3835	2.11776e-08	1.61498e-06	1.78667	7.56667	1.65	1.61	2.1	6.63	11.03	5.04
Sh2b2	1.98841	0.145233	10.9347	0.000943801	0.0149984	0.163333	0.696667	0.11	0.19	0.19	0.21	0.24	1.64
Fam190a	1.9865	0.00115466	5.02969	0.0249164	0.186858	0.0766667	0.32	0.12	0.04	0.07	0.36	0.6	0
Spry1	1.97908	2.56742	7.54781	0.0060083	0.0671306	1.12	4.64	0.77	0.46	2.13	1.27	1.79	10.86
9530026P05Rik	1.97815	0.81269	28.5158	9.29347e-08	5.91186e-06	0.166667	1.02	0.09	0.25	0.16	0.75	1.62	0.69
Igf2as	1.9725	1.83858	23.1771	1.4775e-06	6.51695e-05	0.03	0.0166667	0.02	0.06	0.01	0.02	0.02	0.01
Dok3	1.96961	0.779695	25.3663	4.7413e-07	2.48017e-05	0.436667	2.09333	0.32	0.48	0.51	0.98	2.75	2.55
5830432E09Rik	1.96842	1.30404	17.9557	2.26111e-05	0.000706751	0.0366667	0.0233333	0.06	0.05	0	0	0.07	0
Nlrc3	1.96497	0.777791	15.6922	7.45293e-05	0.00189832	0.04	0.363333	0.04	0.05	0.03	0.18	0.3	0.61
Scn5a	1.96222	0.145893	23.3492	1.351e-06	6.08621e-05	0.0366667	0.196667	0.03	0.02	0.06	0.28	0.09	0.22
2010110P09Rik	1.95619	5.19239	39.7424	2.89763e-10	3.2751e-08	15.6567	63.2167	18.27	12.33	16.37	55.44	71.01	63.2
Gm6213	1.94707	2.42213	24.2195	8.59579e-07	4.06023e-05	3.65333	15.1267	4.33	1.87	4.76	13.48	15.64	16.26
Scml4	1.94162	0.450054	24.7469	6.53742e-07	3.21717e-05	0.103333	0.536667	0.1	0.1	0.11	0.34	0.61	0.66
Ttc9	1.93762	5.4699	15.458	8.43596e-05	0.00209805	10.8333	42.5067	8.62	7.66	16.22	22.65	26.04	78.83
Pvt1	1.93511	2.65612	36.8929	1.24802e-09	1.29497e-07	0.776667	3.28333	0.66	0.7	0.97	3.52	3.77	2.56
Nat8l	1.93264	0.31593	13.1734	0.00028395	0.00567854	0.0866667	0.346667	0.12	0.09	0.05	0.16	0.19	0.69
Itga2	1.93225	0.573627	23.2216	1.44366e-06	6.4124e-05	0.11	0.586667	0.1	0.08	0.15	0.61	0.81	0.34
Ptpn20	1.93026	0.325162	9.98199	0.00158079	0.0228567	0.18	0.776667	0.3	0.17	0.07	0.63	1.52	0.18
Zdbf2	1.92615	0.737992	16.8247	4.0996e-05	0.00114816	0.04	0.216667	0.06	0.03	0.03	0.37	0.23	0.05
Sh3tc2	1.92326	0.910738	26.656	2.43089e-07	1.39243e-05	0.16	0.72	0.09	0.18	0.21	0.86	0.92	0.38
Ptchd1	1.92083	4.39454	31.8357	1.67781e-08	1.32747e-06	1.57667	6.31	1.59	1.57	1.57	5.03	9.05	4.85
Ier5l	1.91805	1.09149	12.7603	0.000354059	0.00675004	0.616667	2.43	0.61	0.65	0.59	0.61	1.41	5.27
Ltc4s	1.91658	-0.0858008	18.2355	1.95206e-05	0.000620882	0.79	3.07	0.89	0.48	1	1.56	2.1	5.55
Cit	1.91239	1.59118	27.9621	1.23718e-07	7.56591e-06	0.133333	0.59	0.06	0.14	0.2	0.51	0.79	0.47
AI115009	1.90916	-0.303983	11.1465	0.000841916	0.0136115	0.13	0.623333	0.15	0.2	0.04	0.44	1.29	0.14
Hmcn1	1.90274	2.07848	31.4429	2.05394e-08	1.58968e-06	0.0666667	0.376667	0.07	0.06	0.07	0.33	0.38	0.42
Syt17	1.90132	0.868258	30.3849	3.54272e-08	2.53375e-06	0.376667	1.52667	0.38	0.38	0.37	1.15	1.92	1.51
Ptprv	1.89948	0.548537	19.0044	1.30416e-05	0.000433316	0.0566667	0.323333	0.12	0.01	0.04	0.15	0.24	0.58
Jag2	1.8948	2.85578	23.4642	1.27262e-06	5.76998e-05	0.783333	2.91333	0.66	0.58	1.11	1.55	2.98	4.21
Tmc8	1.89352	2.73862	37.6362	8.52498e-10	8.99314e-08	1.09	4.36667	1.04	1.12	1.11	3.69	4.8	4.61
Grap	1.89348	4.28412	15.004	0.000107282	0.00252902	6.23	24.1967	7.54	4.63	6.52	12.05	14.01	46.53
St8sia6	1.88843	3.48942	30.2248	3.84762e-08	2.70595e-06	1.85	7.03667	2.03	1.64	1.88	5.61	10.2	5.3
Rhbdl2	1.87672	1.6607	27.469	1.59636e-07	9.57738e-06	1.05	4.32667	0.65	1.4	1.1	3.94	3.94	5.1
Lcp1	1.87643	2.11458	23.2666	1.41028e-06	6.33077e-05	0.596667	2.25	0.56	0.37	0.86	2.05	3.14	1.56
Slc27a3	1.87336	3.24216	25.2303	5.08764e-07	2.63953e-05	2.18667	8.09667	1.87	1.81	2.88	4.72	9.75	9.82
Thsd1	1.86868	5.38613	38.1383	6.59043e-10	7.10188e-08	4.66667	17.8767	4.53	4.61	4.86	15.13	19.97	18.53
Angpt2	1.86559	4.87087	22.5456	2.05212e-06	8.80601e-05	6.25333	23.4133	7.4	4.25	7.11	12.66	29.92	27.66
Ctla2a	1.8563	7.8771	30.9133	2.69819e-08	2.0092e-06	93.3233	343.2	72.84	99.58	107.55	266.85	329.37	433.38
Rassf10	1.84441	4.48531	16.9035	3.9328e-05	0.00111128	3.29	12	2.79	3.09	3.99	5.83	9.3	20.87
Spns2	1.84173	5.76386	22.998	1.62169e-06	7.10344e-05	8.60667	31.92	6.88	7.09	11.85	19.2	41.19	35.37
Vpreb1	1.82736	0.310827	15.5834	7.89452e-05	0.00198681	0.816667	3.26333	0.72	0.45	1.28	1.49	2.27	6.03
Car9	1.82564	0.104065	19.0966	1.24268e-05	0.00041727	0.193333	0.93	0.18	0.17	0.23	1.06	1.27	0.46
Arhgap27	1.81555	3.85191	13.7789	0.000205635	0.00433856	1.87333	6.86667	1.62	1.12	2.88	3.73	4.98	11.89
Cyyr1	1.81172	2.3911	31.0877	2.46633e-08	1.84741e-06	0.976667	3.25	0.94	0.98	1.01	2.06	3.95	3.74
Tfpi2	1.81142	1.88081	20.4124	6.2424e-06	0.000230386	1.38333	4.92333	1.58	1.07	1.5	3.42	3.57	7.78
Nr4a2	1.80687	4.56599	30.8149	2.83856e-08	2.10137e-06	3.17667	12.8767	3.52	2.72	3.29	8.75	14.72	15.16
7530420F21Rik	1.80149	-0.326807	13.142	0.000288748	0.00573824	0.15	0.546667	0.16	0.29	0	0.47	1.07	0.1
Car7	1.7974	2.7734	23.206	1.4554e-06	6.44191e-05	2.17333	8.28667	2.12	1.83	2.57	6.28	5.87	12.71
Adam12	1.78842	0.655165	26.1517	3.15611e-07	1.74468e-05	0.0633333	0.333333	0.06	0.05	0.08	0.34	0.36	0.3
Tes	1.75937	5.58834	25.8163	3.75507e-07	2.01421e-05	11.1233	38.4833	13.38	7.42	12.57	29.16	44.78	41.51
Mpp3	1.75748	0.423562	11.3804	0.000742248	0.0122186	0.156667	0.77	0.15	0.25	0.07	0.64	0.32	1.35
Cenpm	1.75338	0.766122	26.9294	2.11022e-07	1.23672e-05	0.706667	2.22667	0.58	0.59	0.95	1.87	2.23	2.58
Gpr39	1.75152	2.18831	21.4147	3.69926e-06	0.000147143	0.87	1.70667	0.69	0.69	1.23	1.56	2.48	1.08
Grrp1	1.74412	3.82007	19.6674	9.21589e-06	0.000320505	6.50667	22.0033	7.01	5.58	6.93	10.24	27.19	28.58
Olfr1372-ps1	1.74342	0.681473	22.4978	2.1038e-06	8.99731e-05	0.466667	1.81333	0.44	0.57	0.39	2.32	1.24	1.88
Enpp3	1.73992	4.18166	24.7412	6.55684e-07	3.21717e-05	3.44	11.8633	3.86	3.35	3.11	6.94	16.35	12.3
Bst1	1.73635	4.84795	30.7673	2.90896e-08	2.14096e-06	6.87667	23.27	6.02	6.55	8.06	21.66	28.36	19.79
Arhgap22	1.73198	2.28638	24.5593	7.20565e-07	3.47555e-05	0.913333	3.17333	0.66	0.79	1.29	2.82	4.1	2.6
Gimap8	1.72969	2.65519	31.6204	1.87452e-08	1.46478e-06	0.93	3.26333	0.92	0.88	0.99	3.29	3.62	2.88
Plekho1	1.72179	4.29431	21.0914	4.37898e-06	0.000168491	8.26	28.24	7.99	5.85	10.94	19.64	26.74	38.34
1190002H23Rik	1.7134	3.39964	7.63981	0.00570939	0.0646468	7.13333	23.58	5.23	1.88	14.29	13.41	9.87	47.46
Smagp	1.71205	4.38446	17.8575	2.38073e-05	0.00073867	14.3133	46.9667	13.75	13.25	15.94	25.94	42.49	72.47
Flt1	1.71033	6.04884	24.6667	6.81499e-07	3.31811e-05	4.96333	17.1733	4.66	4.7	5.53	15.12	24.99	11.41
Hpgd	1.70241	3.49756	9.11491	0.00253535	0.0338554	3.98	13.77	5.05	4.22	2.67	11.82	26.53	2.96
Lpl	1.6913	4.29375	8.49607	0.00355915	0.0443457	2.66333	8.86	2.9	0.99	4.1	4.6	4.57	17.41
Neil3	1.6879	1.62488	21.8134	3.00491e-06	0.000123504	0.736667	2.59333	0.75	0.62	0.84	2.1	3.72	1.96
Pcp4l1	1.68444	5.42172	7.04613	0.00794369	0.0828329	16.8867	54.4167	23.84	8.52	18.3	22.66	17.23	123.36
Tmem171	1.68243	2.66748	29.6649	5.13563e-08	3.49527e-06	2.99	9.50333	2.68	3.18	3.11	10.23	10.27	8.01
Igf2	1.68191	5.9574	20.2069	6.95027e-06	0.000250665	8.74	28.8933	7.79	11.29	7.14	20.63	23.14	42.91
Nid2	1.68038	3.85774	18.6308	1.58638e-05	0.000513606	1.5	5.15333	1.15	0.91	2.44	4.84	6.84	3.78
Pthlh	1.67448	7.45441	27.7396	1.38795e-07	8.40672e-06	73.78	240.397	72.19	84.62	64.53	191.1	244.49	285.6
Pbld1	1.67444	0.591868	14.7472	0.000122929	0.00282424	0.35	1.33333	0.44	0.49	0.12	1.11	1.96	0.93
Ccdc141	1.6534	3.13767	22.0683	2.63118e-06	0.000109566	0.7	2.35	1	0.41	0.69	2.02	2.96	2.07
Rgs2	1.6528	3.68602	26.0563	3.31606e-07	1.80954e-05	2.11667	7.30667	2.54	2.19	1.62	5.72	8.76	7.44
Sprr2a1	1.64808	3.24328	17.1332	3.48477e-05	0.00100446	0.37	1.17	0.49	0.4	0.22	1.39	1.43	0.69
Sprr2a2	1.64808	3.24328	17.1332	3.48477e-05	0.00100446	0.37	1.17	0.49	0.4	0.22	1.39	1.43	0.69
Efna3	1.64274	1.02233	21.7789	3.05952e-06	0.000125341	0.313333	0.97	0.29	0.38	0.27	0.68	0.87	1.36
Thbs4	1.63352	-0.518766	4.35583	0.0368825	0.24179	0.103333	0.336667	0.1	0.05	0.16	0.03	0	0.98
Scube1	1.63104	1.03341	21.646	3.279e-06	0.000132616	0.116667	0.44	0.14	0.1	0.11	0.4	0.57	0.35
Nptx1	1.62728	1.23636	19.4769	1.01825e-05	0.000350274	0.246667	0.793333	0.28	0.31	0.15	0.97	0.72	0.69
Tbx3	1.62597	0.00211704	14.7651	0.000121771	0.00280273	0.0866667	0.29	0.06	0.03	0.17	0.36	0.26	0.25
Vav3	1.62444	1.74796	21.468	3.59775e-06	0.000144126	0.333333	1.10667	0.35	0.31	0.34	0.96	0.85	1.51
Wipf3	1.62406	2.95898	24.8043	6.34542e-07	3.13776e-05	1.05	3.38667	1	0.9	1.25	2.52	3.63	4.01
Ltbp2	1.62194	4.95128	11.5444	0.000679526	0.0113484	2.45	8.2	3.02	1.47	2.86	8.53	13.34	2.73
Rgs10	1.61432	1.54881	22.0255	2.69049e-06	0.000111229	2.35667	7.38333	2.42	2.55	2.1	5.98	6.54	9.63
Ptpre	1.61293	4.16041	20.3778	6.35613e-06	0.000233224	1.67	5.41333	1.42	1.61	1.98	3.45	5.09	7.7
Adamts5	1.61265	3.55482	23.9298	9.99142e-07	4.61654e-05	0.823333	2.57667	0.88	0.57	1.02	2.34	2.47	2.92
Wnt5b	1.60682	0.998444	17.7351	2.53904e-05	0.000774926	0.506667	1.55	0.45	0.39	0.68	1.34	1.11	2.2
Ces2c	1.60275	1.37021	11.3665	0.000747788	0.0122938	0.246667	1.59	0.29	0.38	0.07	1.64	2.48	0.65
Dusp5	1.60085	1.20693	14.8745	0.000114906	0.0026696	0.983333	3.03667	0.88	0.63	1.44	1.79	4.19	3.13
Arl4a	1.594	6.99254	14.3105	0.000154995	0.0034064	20.58	63.0467	21.85	18.17	21.72	40.08	40.51	108.55
Sphk1	1.59249	2.8213	10.5234	0.00117874	0.0178702	1.86667	6.32	1.56	1.05	2.99	3.51	3.27	12.18
Pgf	1.59173	3.45466	14.1532	0.000168514	0.0036416	4.14667	13.2867	2.97	2.56	6.91	10.62	9.8	19.44
Nhedc2	1.59146	-0.0710075	12.1624	0.000487623	0.00863332	0.133333	0.653333	0.12	0.25	0.03	0.3	0.51	1.15
Tppp3	1.58843	7.08125	11.2865	0.00078074	0.0127692	93.12	281.557	105	74.19	100.17	141.11	169.54	534.02
Arhgap18	1.58751	2.93918	22.236	2.41107e-06	0.000102422	1.25667	3.84333	1.45	0.94	1.38	3.54	5.23	2.76
Sox4	1.58643	3.22527	13.347	0.000258842	0.00528496	1.67667	5.39333	1.56	1.5	1.97	2.02	6.03	8.13
Kcnj13	1.58432	-0.0677756	4.67029	0.0306887	0.215812	0.323333	1.21	0.32	0.6	0.05	2.81	0.72	0.1
Arhgap26	1.58222	3.14013	19.4591	1.02777e-05	0.000352588	0.586667	1.79667	0.46	0.87	0.43	1.71	2.25	1.43
F8	1.57571	5.05141	18.0787	2.11955e-05	0.000665792	2.46	7.85667	3.04	2.64	1.7	7.82	11.09	4.66
Sh2d3c	1.56916	5.59134	16.0066	6.31236e-05	0.00165441	8.83667	26.85	7.7	7.76	11.05	17.54	20.85	42.16
Bik	1.56501	3.37391	14.2809	0.000157454	0.00344252	7.02	21.16	6.41	5.59	9.06	15.33	13.93	34.22
Adora2a	1.5584	0.368925	4.25132	0.0392199	0.252023	0.313333	0.856667	0.26	0.03	0.65	0.24	0.48	1.85
Kcnb1	1.55828	1.97019	12.2227	0.000472126	0.00840597	0.623333	1.91333	0.41	0.51	0.95	1.27	3.29	1.18
Snai1	1.55651	-0.00925304	9.80336	0.00174193	0.0247487	0.37	1.07667	0.21	0.34	0.56	0.55	0.81	1.87
Tmem88	1.5522	6.46628	25.0429	5.60698e-07	2.81662e-05	21.64	88.1433	29.78	16.17	18.97	85.69	95.33	83.41
D030025P21Rik	1.54951	1.11841	10.8694	0.000977657	0.0154124	0.0866667	0.146667	0.08	0.09	0.09	0.14	0.23	0.07
Thrsp	1.54659	1.13146	6.29762	0.01209	0.112299	1.42	4.1	1.27	0.15	2.84	3.13	3.87	5.3
Tk1	1.5435	1.72402	16.9984	3.74107e-05	0.00106184	1.28333	4.66667	1.12	1.03	1.7	3.15	5.88	4.97
5430407P10Rik	1.53688	2.82838	18.4149	1.77667e-05	0.00056939	1.20333	3.52333	1.22	0.88	1.51	2.46	3.79	4.32
Ces2d-ps	1.53494	0.884933	8.46524	0.00361998	0.0449708	0.0633333	0.146667	0.04	0.15	0	0.31	0.13	0
Hmgb3	1.53493	4.10406	17.02	3.69878e-05	0.0010522	6.90667	20.1767	6.94	6.37	7.41	15.81	14.05	30.67
Itih5	1.53171	3.69842	22.1857	2.47508e-06	0.000103748	0.963333	2.89667	1.08	0.7	1.11	2.76	2.49	3.44
Fscn1	1.52915	2.10326	5.62702	0.0176856	0.146897	0.96	2.83	0.79	0.12	1.97	1.61	2.4	4.48
Apod	1.5288	1.0055	7.30461	0.0068778	0.0749923	0.596667	1.73	0.72	0.44	0.63	1.4	0.31	3.48
Cotl1	1.51864	1.30114	15.7128	7.37253e-05	0.00188543	0.91	2.85333	0.98	0.95	0.8	2.63	4.35	1.58
Aurkb	1.51791	1.90699	16.4324	5.04168e-05	0.00136373	1.25667	3.52	1.13	0.84	1.8	3.01	4.45	3.1
Unc5a	1.51755	0.710149	12.7136	0.000362999	0.00681226	0.193333	0.676667	0.21	0.26	0.11	0.5	1.04	0.49
Pcdh17	1.51537	0.356374	8.3065	0.00395034	0.0483163	0.08	0.203333	0.09	0.05	0.1	0.22	0.35	0.04
Neurl3	1.51091	3.87845	19.159	1.20272e-05	0.000406006	3.44	10.0333	3	4.1	3.22	8.92	14.04	7.14
2200002D01Rik	1.50726	4.19835	21.2034	4.13022e-06	0.000159891	22.2733	67.4567	20.88	20.32	25.62	49.79	68.57	84.01
D8Ertd82e	1.50213	2.78765	17.1445	3.46417e-05	0.00100446	0.88	2.61333	1.1	0.56	0.98	3.17	2.95	1.72
Ifi204	1.49907	2.94843	13.1595	0.000286072	0.00570937	0.736667	3.11	0.6	0.95	0.66	2.07	6.09	1.17
Inpp4b	1.49853	2.24776	16.1492	5.85431e-05	0.00154718	0.543333	1.72	0.73	0.61	0.29	2.04	1.98	1.14
Nmb	1.49474	2.30781	21.0486	4.47769e-06	0.000171767	5.53333	15.18	4.28	5.7	6.62	12.09	18.48	14.97
Sema3d	1.49465	5.51756	15.1747	9.80082e-05	0.00234978	4.36333	12.4933	5.56	4.62	2.91	10.23	8.93	18.32
Shcbp1	1.49401	1.35092	11.2262	0.000806506	0.0130892	0.696667	1.97333	0.93	0.44	0.72	2.31	2.75	0.86
Ccrn4l	1.49375	2.43833	17.9105	2.3154e-05	0.000721937	1.11333	3.23667	1.01	1.04	1.29	2.01	3.4	4.3
Cdca5	1.49282	0.347325	12.5972	0.000386325	0.0071603	0.433333	1.24333	0.34	0.27	0.69	1.01	1.79	0.93
Itih3	1.49123	1.26581	10.8312	0.000998043	0.0156611	0.403333	1.39	0.49	0.28	0.44	1.48	2.15	0.54
Ankle1	1.48695	0.609641	14.1925	0.000165031	0.00358957	0.29	0.99	0.21	0.24	0.42	0.63	1.66	0.68
Mboat1	1.48128	3.10702	12.0487	0.000518274	0.00906192	1.83333	5.12333	1.79	1.32	2.39	3.36	3.25	8.76
AW551984	1.47913	1.47571	15.3333	9.0115e-05	0.00221079	0.336667	1.07	0.38	0.35	0.28	0.82	0.71	1.68
Birc5	1.47544	2.56066	18.8995	1.37789e-05	0.000451882	4.12	11.7167	4.83	2.46	5.07	8.27	13.32	13.56
Ak4	1.47267	1.36876	16.5911	4.63677e-05	0.0012788	0.323333	0.946667	0.36	0.32	0.29	0.79	1.38	0.67
Dcdc2a	1.47059	1.81461	15.2028	9.6558e-05	0.00232824	0.313333	0.856667	0.33	0.29	0.32	1.27	0.76	0.54
AA467197	1.46616	0.283013	12.3055	0.000451617	0.00812076	1.34333	3.91	1.03	1.11	1.89	3.88	2.37	5.48
Cdk1	1.46311	2.86316	13.2475	0.000272949	0.00553728	1.59667	4.45333	1.24	1.03	2.52	2.72	5.99	4.65
As3mt	1.46227	4.02267	19.1418	1.21356e-05	0.000408577	6.04333	17.3867	6.21	6.13	5.79	11.95	17.65	22.56
Cmtm3	1.46022	5.47865	18.7146	1.51812e-05	0.000494032	18.48	52.1533	19.91	15.28	20.25	39.88	46.27	70.31
Tril	1.45949	1.93322	6.08279	0.0136505	0.121095	0.42	1.23	0.43	0.25	0.58	0.78	0.33	2.58
Angptl4	1.45893	4.90355	9.96484	0.00159558	0.022979	10.5167	29.3133	11.82	6.6	13.13	19.07	16.5	52.37
Abcb1a	1.45527	3.49735	14.2269	0.000162041	0.00353059	1.02333	3.43	1.04	1.06	0.97	3.1	5.42	1.77
Pla2r1	1.44909	0.903719	11.0103	0.000906079	0.0145191	0.136667	0.476667	0.21	0.11	0.09	0.38	0.74	0.31
Eltd1	1.4473	7.28041	14.1647	0.000167482	0.00363041	23.49	66.21	26.5	26.12	17.85	67.68	98.34	32.61
Fam83d	1.4471	1.59074	14.3837	0.000149086	0.00332854	0.896667	2.43	0.94	0.52	1.23	1.71	2.6	2.98
S100a4	1.44706	5.79461	20.46	6.08896e-06	0.00022538	107.56	294.603	124.13	94.45	104.1	345.82	342.58	195.41
Chn1	1.44547	4.21307	14.5072	0.000139622	0.00316184	2.81333	7.79333	2.68	2.3	3.46	5.05	6.24	12.09
1190002F15Rik	1.44471	1.66903	20.3958	6.29688e-06	0.000231722	5.00333	13.7567	5.8	4.06	5.15	12.62	14.82	13.83
Spc24	1.4364	1.93563	17.4009	3.02683e-05	0.000899848	1.70667	5.11667	1.9	1	2.22	4.12	5.29	5.94
Asf1b	1.43589	1.61592	16.2455	5.56416e-05	0.00148288	1.37	3.64	1.35	1.05	1.71	2.73	3.26	4.93
Cdkn1a	1.43222	6.62642	6.5606	0.0104261	0.101293	30.4933	86.52	19.27	16.27	55.94	50.51	40.33	168.72
Ldb2	1.43143	7.19101	15.8638	6.80668e-05	0.00176569	36.8933	103.223	49.96	38.22	22.5	113.49	123.71	72.47
Cep55	1.43041	2.05796	12.2757	0.000458898	0.00822549	1.04667	2.92333	1.02	0.81	1.31	2.74	4.74	1.29
Rad18	1.42404	3.0306	21.2284	4.07669e-06	0.000158303	1.91	5.33667	1.71	2.19	1.83	4.57	6.11	5.33
Fam38b	1.42374	1.24341	9.62401	0.0019205	0.0268045	0.08	0.246667	0.08	0.04	0.12	0.17	0.09	0.48
Xdh	1.42173	4.28856	17.1208	3.50764e-05	0.00100688	2.60333	7.25333	2.28	2.33	3.2	4.97	10.26	6.53
Lamc2	1.42104	1.65085	16.9308	3.87682e-05	0.00109791	0.333333	0.993333	0.28	0.23	0.49	1.1	0.77	1.11
Adamts4	1.41702	1.73154	14.3255	0.000153771	0.00338536	0.466667	1.15333	0.28	0.31	0.81	1.1	1.14	1.22
Kcnk3	1.41542	-0.0925443	10.5615	0.00115467	0.0176321	0.146667	0.406667	0.15	0.09	0.2	0.31	0.26	0.65
Gng11	1.41407	7.19338	11.2412	0.000800001	0.013017	134.023	369.333	134.27	119.13	148.67	238.65	229.12	640.23
Pdgfc	1.40719	3.92517	13.3569	0.000257477	0.00526826	2.92667	8.03	3.78	2.33	2.67	8.66	11.36	4.07
Rgs7bp	1.40402	2.38444	5.2024	0.0225557	0.174425	0.503333	1.42667	0.73	0.23	0.55	0.54	0.6	3.14
Cklf	1.40016	2.89421	12.8011	0.000346409	0.0066543	9.01	22.55	9.03	8.53	9.47	19.26	14.35	34.04
Eps8l2	1.39991	5.20592	17.902	2.32577e-05	0.000723388	7.49333	20.7733	6.49	8.47	7.52	15.84	28.67	17.81
Avpi1	1.39185	5.87805	18.9578	1.33638e-05	0.000440554	46.8067	123.877	54.43	43.57	42.42	101.56	113.29	156.78
Lamb1	1.39136	4.58176	13.9903	0.000183756	0.00390296	2.59667	7.15667	2.07	1.73	3.99	5.67	7.33	8.47
Fgl2	1.39103	8.53018	16.825	4.09904e-05	0.00114816	65.6533	176.447	74.64	61.68	60.64	144.81	138.86	245.67
Palm	1.39054	6.5802	14.0196	0.000180919	0.00384917	23.42	60.6367	19.91	20.35	30	40.91	54.01	86.99
Ccdc67	1.38661	-0.318783	5.66836	0.0172736	0.14443	0.113333	0.33	0.13	0.19	0.02	0.59	0.26	0.14
Serp2	1.38283	1.02503	11.9118	0.000557803	0.00960712	1.50333	4.70333	1.09	1.76	1.66	2.85	4.61	6.65
Ablim3	1.37848	2.74607	6.74726	0.00938917	0.0944813	0.93	2.48333	0.77	0.25	1.77	3.01	1.25	3.19
Kif22	1.37198	2.58985	19.0375	1.28173e-05	0.000429245	1.86	4.95667	1.84	1.6	2.14	4.16	5.88	4.83
Ttk	1.36318	1.09832	11.1194	0.000854308	0.0137591	0.4	1.22	0.46	0.37	0.37	0.89	2.04	0.73
Hbegf	1.3614	5.89887	21.6662	3.24466e-06	0.000131648	16.6567	44.9467	17.13	15.14	17.7	41.12	48.99	44.73
Aqp1	1.35968	7.84966	13.2476	0.000272924	0.00553728	57.5167	152.823	36.19	49.69	86.67	158.54	125.08	174.85
Spc25	1.35717	2.62056	15.3536	8.91504e-05	0.00219563	3.28667	8.48333	3.85	2.44	3.57	6.36	8.78	10.31
Pdlim4	1.3536	6.58491	18.1189	2.07527e-05	0.000653502	59.9033	155.6	64.37	52.65	62.69	123.53	144.35	198.92
Ebf1	1.34179	4.79431	15.2633	9.35155e-05	0.00226784	7.89667	20.8833	8.91	6.57	8.21	13.23	24.14	25.28
Trip13	1.3397	0.891396	15.3459	8.95173e-05	0.00220039	0.506667	1.35667	0.44	0.62	0.46	1.34	1.48	1.25
Tubb6	1.33744	5.59564	10.2293	0.00138227	0.0204417	19.6467	51.0167	18.09	13.33	27.52	29.92	44.47	78.66
Slco2b1	1.33501	5.25477	14.34	0.000152584	0.00337758	5.29333	14.0667	4.61	4.27	7	10.22	19.66	12.32
Kank3	1.33488	7.53086	10.7037	0.00106924	0.0165471	42.1467	108.81	40.76	40.37	45.31	49.77	98.4	178.26
Hopx	1.33387	1.16534	13.751	0.000208706	0.00438871	1.41333	3.60667	1.05	1.28	1.91	4.17	2.66	3.99
Slc22a4	1.33242	2.3003	14.9418	0.000110876	0.00259923	1.26333	3.39333	1.56	1.33	0.9	2.9	2.86	4.42
Cdca8	1.3323	2.06914	11.921	0.000555047	0.00957266	1.80667	4.62	1.47	1.12	2.83	3.09	6.16	4.61
Ncaph	1.33123	1.98608	14.9166	0.000112367	0.00262446	0.946667	2.59	1.07	0.76	1.01	1.66	3.51	2.6
Bmp2k	1.32999	3.45054	13.2222	0.000276646	0.00558542	0.913333	2.64333	0.7	0.69	1.35	2.44	3.73	1.76
Cngb1	1.32317	1.93976	15.4993	8.25344e-05	0.0020567	0.586667	1.69333	0.36	0.81	0.59	1.28	1.66	2.14
Cd1d1	1.32276	1.98944	13.067	0.000300549	0.00588954	1.50333	3.84667	1.76	1.77	0.98	3.47	2.74	5.33
Igfbp3	1.31883	4.30578	5.91366	0.0150239	0.129556	5.73	14.8033	3.29	2.12	11.78	8.67	17.11	18.63
B230206H07Rik	1.31154	2.99213	14.8196	0.000118301	0.00273778	0.04	0.08	0.03	0.09	0	0.13	0.07	0.04
Nipal4	1.31142	0.682765	12.4735	0.00041277	0.00754459	0.286667	0.82	0.22	0.39	0.25	0.53	0.91	1.02
Myo1b	1.31018	2.78934	10.9544	0.000933822	0.0148882	0.39	1.6	0.39	0.08	0.7	1.31	0.84	2.65
Ptpn18	1.31003	3.04011	8.29633	0.00397254	0.0483542	2.90333	7.70667	4.12	2.35	2.24	4.73	4.75	13.64
Alox12	1.30863	0.987494	12.4072	0.000427685	0.00777882	0.41	1.07667	0.35	0.24	0.64	1.11	0.89	1.23
Psat1	1.30696	1.95586	16.5223	4.80804e-05	0.00131458	1.22	3.17	1.22	1.17	1.27	2.31	3.38	3.82
Cyp26b1	1.30449	2.46584	12.9564	0.00031883	0.00619979	0.773333	1.97667	0.82	0.85	0.65	1.36	3.01	1.56
Ube2c	1.30193	2.78102	14.7775	0.000120971	0.00278939	6.23	15.3033	5.36	4.68	8.65	13.67	17.51	14.73
Mrc1	1.29999	1.07975	10.9382	0.000942014	0.0149984	0.16	0.48	0.35	0.03	0.1	0.55	0.35	0.54
Pcdhb7	1.29597	2.26645	14.8993	0.000113407	0.00264386	0.97	2.39667	0.91	1.06	0.94	1.83	3.23	2.13
Batf	1.2936	2.12226	14.3306	0.000153352	0.00338299	3.66333	9.31667	3.89	2.98	4.12	10.57	6.17	11.21
C1qtnf9	1.29338	3.79685	10.1247	0.00146298	0.021489	4.98333	12.7367	2.67	4.51	7.77	9.33	15.82	13.06
Ckap2	1.29175	2.05925	11.6137	0.000654665	0.0109913	1.12333	2.75667	1.53	0.8	1.04	2.98	3.66	1.63
Nrip2	1.2902	0.576453	11.1311	0.000848937	0.0136901	0.276667	1.09667	0.3	0.22	0.31	0.49	1.2	1.6
Dctd	1.2896	1.33311	13.6357	0.000221927	0.00463594	0.843333	2.33333	0.61	0.83	1.09	1.74	2.49	2.77
Lama4	1.28441	6.10509	17.6711	2.62586e-05	0.000795235	7.46333	18.67	8.34	6.56	7.49	18.25	22.96	14.8
Fst	1.28413	1.1405	12.074	0.000511301	0.00896477	0.59	1.61667	0.71	0.34	0.72	1.75	1.67	1.43
Rftn1	1.28253	5.02629	12.3546	0.000439893	0.00794381	7.99333	20.1933	10.48	6.14	7.36	14.88	17.23	28.47
Tmem204	1.27939	6.22195	16.5427	4.75658e-05	0.00130332	30.88	77.9233	29.34	30.24	33.06	57.29	90.96	85.52
LOC329427	1.27924	2.25655	11.9068	0.000559296	0.00961973	0.123333	0.393333	0.14	0.23	0	0.91	0.22	0.05
Plxdc1	1.27497	1.79257	9.10665	0.00254682	0.033937	0.596667	1.71	0.66	0.37	0.76	0.95	1.11	3.07
Mtss1	1.27486	2.88859	17.2467	3.28265e-05	0.000964154	0.93	2.30667	1.07	0.75	0.97	2.61	2.1	2.21
Fjx1	1.27393	1.61688	6.79225	0.00915544	0.0925546	0.913333	2.20667	0.76	0.42	1.56	1.15	2.04	3.43
Ccnb1	1.27118	3.34816	14.3916	0.000148465	0.00332242	3.19667	8.09667	3.69	2.11	3.79	7.1	8.69	8.5
Nqo1	1.27086	5.48888	14.7942	0.000119901	0.00276975	20.75	50.9933	22.81	21.88	17.56	38.53	46.97	67.48
Nme4	1.27013	0.596589	13.0495	0.000303361	0.00593547	1.07333	2.59333	0.84	1.38	1	2.86	2.19	2.73
Gcnt2	1.26985	4.35384	8.3704	0.00381382	0.0470099	3.43667	8.8	3.9	2.79	3.62	9.65	13.73	3.02
Tpst2	1.26823	6.6687	11.6643	0.000637121	0.0107681	40.0767	98.1867	41.06	34.72	44.45	58.03	95.85	140.68
Pafah1b3	1.26191	0.957313	11.6606	0.000638393	0.0107752	1.55667	3.91	2.21	1	1.46	4.3	2.6	4.83
Spire2	1.25728	0.109247	6.67017	0.009804	0.0977465	0.273333	0.793333	0.19	0.18	0.45	0.58	1.49	0.31
Cdca2	1.25183	0.724018	10.8257	0.00100102	0.0156762	0.283333	0.693333	0.36	0.21	0.28	0.49	1.08	0.51
Gsg2	1.25101	0.347484	9.98096	0.00158168	0.0228567	0.276667	0.806667	0.15	0.29	0.39	0.59	1.16	0.67
Plaur	1.24508	6.81829	11.6698	0.000635218	0.0107647	54.04	131.813	49.76	50.76	61.6	87.7	111.27	196.47
Has3	1.24469	0.420879	11.4811	0.000703058	0.0116798	0.136667	0.356667	0.14	0.17	0.1	0.38	0.49	0.2
Rab20	1.24387	1.36124	13.3802	0.000254292	0.00523428	1.43	3.51	1.73	1.65	0.91	3.32	4.96	2.25
Foxf2	1.24224	2.83812	10.9793	0.000921344	0.0147264	2.15333	5.20333	1.81	1.87	2.78	3.19	7.23	5.19
Gm14207	1.24203	1.71824	12.9183	0.000325388	0.00628869	0.73	3.24333	0.43	0.99	0.77	3.18	1.63	4.92
Mt2	1.24191	4.60396	13.1331	0.000290122	0.00574751	44.5067	107.083	33.72	44	55.8	84.22	99.51	137.52
B930003M22Rik	1.24164	0.965129	12.4724	0.000413019	0.00754459	1.26	2.99667	1.25	1.43	1.1	2.25	3.66	3.08
Mbd2	1.24097	5.44352	5.36923	0.020495	0.16256	17.2367	42.2467	15.36	14.52	21.83	18.76	18.27	89.71
Slc37a2	1.23853	0.765496	8.24954	0.00407624	0.0494263	0.213333	0.63	0.26	0.22	0.16	0.67	0.97	0.25
Hmmr	1.23535	2.71216	6.94061	0.00842602	0.0867178	0.883333	2.11667	1.02	0.47	1.16	1.98	3.54	0.83
Stx3	1.23487	4.61614	16.1431	5.87316e-05	0.00154892	5.58667	13.3167	5.98	5.72	5.06	10.8	14.26	14.89
Serpina3n	1.2344	2.17893	6.29196	0.0121287	0.11243	1.41	3.51667	1.17	0.71	2.35	1.53	2.29	6.73
Baiap2	1.23411	4.30149	12.7096	0.000363779	0.00681226	6.51667	15.8167	5.42	5.32	8.81	12.13	20.72	14.6
Ifi27l2b	1.2338	4.33132	16.4972	4.87211e-05	0.00132637	11.3833	27.8033	10.84	9.47	13.84	26.25	28.77	28.39
Ctla2b	1.23008	5.06778	16.3704	5.20919e-05	0.00140305	22.31	50.9833	23.72	23.34	19.87	49.98	43.14	59.83
B4galt6	1.21931	1.82685	11.0613	0.000881506	0.0141791	0.42	1.02	0.46	0.3	0.5	1.09	1.35	0.62
Slc16a11	1.21904	1.02868	12.2008	0.000477691	0.0084931	0.483333	1.36667	0.49	0.42	0.54	0.89	1.58	1.63
Syce2	1.21903	1.90424	6.59707	0.0102147	0.100316	2.87	7.94	2.43	3.5	2.68	5.37	2.94	15.51
Ckap2l	1.21757	2.75953	11.7335	0.000613863	0.0104729	1.51	3.77	1.67	1.4	1.46	3.31	5.68	2.32
Pik3r6	1.21708	3.41411	12.6934	0.000366946	0.0068614	2.09667	5.15	1.59	1.7	3	3.78	6.6	5.07
Cdca3	1.2136	1.73438	12.9703	0.000316472	0.00617291	1.71667	3.95333	1.83	1.29	2.03	3.75	4.84	3.27
Tcf4	1.21275	6.77965	15.5651	7.97108e-05	0.00199639	9.54333	22.8267	8.95	9	10.68	18.02	25.11	25.35
Cd68	1.21203	0.275968	8.26235	0.00404757	0.0491258	0.323333	1.17333	0.46	0.28	0.23	1.56	0.99	0.97
Ube2t	1.21187	1.41589	12.3765	0.00043478	0.00787393	1.89333	4.53333	2	1.29	2.39	3.81	4.05	5.74
Ptgs2	1.20978	6.18532	4.17186	0.0411007	0.260694	11.99	28.6	13.57	17.39	5.01	32.69	47.35	5.76
Dapk2	1.20757	4.61411	6.3418	0.0117925	0.110579	9.75667	23.2567	7.7	6.67	14.9	13.07	15.66	41.04
Ankrd37	1.20368	1.20998	10.6156	0.00112139	0.017186	1.12667	3.65333	0.89	1.6	0.89	2.84	3.98	4.14
Tifa	1.20195	3.84227	11.0294	0.000896778	0.0144065	5.19333	12.0967	4.53	6.04	5.01	7.43	12.01	16.85
Dab2	1.20133	6.73026	15.0526	0.000104556	0.00248244	16.5833	39.4733	17.55	19.25	12.95	34.32	43.65	40.45
Ppp1r3c	1.19877	0.709409	11.2373	0.000801682	0.0130276	0.456667	1.03667	0.62	0.4	0.35	1.14	0.8	1.17
Zfp697	1.19319	0.666334	10.056	0.00151855	0.0221212	0.156667	0.366667	0.14	0.15	0.18	0.44	0.22	0.44
2810417H13Rik	1.18908	1.16333	7.60577	0.00581818	0.0653248	0.623333	1.53	0.26	0.59	1.02	0.85	1.83	1.91
Fam64a	1.18787	2.94008	10.138	0.00145245	0.0214046	3.97667	9.07333	3.67	2.47	5.79	7.38	11.97	7.87
Ccnb2	1.18724	2.89225	11.9855	0.000536164	0.00932654	3.78667	8.72	4.11	2.6	4.65	6.57	11.48	8.11
Cthrc1	1.18495	5.6429	12.9331	0.000322823	0.00624961	34.55	80.2167	32.91	30.56	40.18	76.25	60.16	104.24
Bmp2	1.18073	1.93068	9.85392	0.0016947	0.0241319	1.02667	2.49	1.52	0.77	0.79	1.83	3.53	2.11
Inhba	1.18056	3.92307	10.2821	0.00134324	0.0200048	7.26	17.1367	8.66	5.08	8.04	10.63	17.26	23.52
Gprc5b	1.18054	1.80872	11.8398	0.000579787	0.00991828	0.42	1.63	0.47	0.35	0.44	1.42	1.07	2.4
Hmgb2	1.17899	4.74065	15.1113	0.000101355	0.00242085	6.96333	16.5	6.39	6.96	7.54	14.33	16.33	18.84
Gm10391	1.17385	0.722405	7.74635	0.00538211	0.0618821	0.0533333	0.156667	0.03	0.1	0.03	0.11	0.19	0.17
Gm10394	1.17385	0.722405	7.74635	0.00538211	0.0618821	0.0533333	0.156667	0.03	0.1	0.03	0.11	0.19	0.17
Mnda	1.17201	3.82335	10.6243	0.00111612	0.0171509	2.68333	6.26667	2.52	3.09	2.44	6.26	8.29	4.25
Rapgef4	1.17063	2.74518	12.9013	0.000328358	0.00633642	0.533333	1.53667	0.78	0.43	0.39	1.57	1.95	1.09
Pth1r	1.16741	1.65729	4.66173	0.0308421	0.216304	1.01667	2.20667	1.12	0.71	1.22	0.94	0.81	4.87
Irf5	1.16533	0.561385	12.1795	0.00048317	0.00856645	0.43	1.16	0.36	0.45	0.48	1.01	1.22	1.25
Gja1	1.16467	5.46217	6.72208	0.00952264	0.0955964	10.68	24.5033	11.77	5.81	14.46	17.09	15.66	40.76
Klhl4	1.16421	7.30604	14.354	0.000151456	0.00336364	33.82	78.5233	36.62	39.12	25.72	70.93	83.23	81.41
C330027C09Rik	1.16267	1.8089	12.6554	0.000374492	0.00697689	0.613333	1.47333	0.57	0.5	0.77	1.26	1.78	1.38
D730005E14Rik	1.1625	3.63731	13.7532	0.000208468	0.00438871	1.15667	3.54667	1.09	1.42	0.96	2.55	2.98	5.11
Hist1h2bf	1.16175	3.10852	12.1322	0.000495585	0.00873122	0.143333	16.0867	0	0.43	0	7.53	22.14	18.59
Nusap1	1.16026	2.65872	13.6608	0.000218976	0.00458347	1.49	3.5	1.65	1.23	1.59	2.98	4.47	3.05
Lrrc1	1.15926	3.74794	14.3728	0.000149953	0.003342	3.36333	7.77333	2.96	3.6	3.53	6.57	8.29	8.46
Bcr	1.15736	5.6601	8.65742	0.00325732	0.0413584	5.03333	11.3633	4.48	4.88	5.74	6.97	9.11	18.01
Gm5860	1.15534	0.0635961	7.99109	0.00470081	0.0555626	0.48	0.746667	0.71	0.37	0.36	0.91	0.37	0.96
Gadd45g	1.1541	6.76893	13.1544	0.000286844	0.00570937	77.6367	179.9	70.43	75.54	86.94	150.58	157.48	231.64
Cacna2d3	1.15386	0.885651	6.55813	0.0104406	0.101356	0.243333	0.57	0.22	0.22	0.29	0.74	0.21	0.76
Plk1	1.15126	1.76228	8.62885	0.0033088	0.0418025	1.12333	2.68	1.22	0.61	1.54	2.12	3.61	2.31
Tspan8	1.14948	2.22975	13.3559	0.000257607	0.00526826	2.48667	5.54333	2.51	2.44	2.51	6.34	4.55	5.74
Chrm3	1.14941	2.23239	10.5281	0.00117572	0.0178459	0.656667	1.07	0.63	0.87	0.47	1.34	1.47	0.4
Snhg10	1.147	1.38596	9.85957	0.0016895	0.0240849	4.5	10.96	4.21	4.96	4.33	9.15	7.13	16.6
Ifi205	1.14375	3.12658	9.74891	0.00179429	0.0253504	0.483333	1.95	0.93	0.37	0.15	2.7	2.36	0.79
A4galt	1.14187	4.88109	14.8693	0.000115225	0.00267148	10.7633	24.5633	12.78	9.89	9.62	25.29	26.89	21.51
Zfp366	1.13431	0.925705	6.61794	0.0100956	0.0994557	0.396667	1.02667	0.31	0.59	0.29	1.09	1.55	0.44
Gucy1a3	1.13394	5.68496	10.8974	0.000962989	0.0152191	8.31	18.6167	12.1	5.44	7.39	17.26	21.32	17.27
Gsto1	1.12809	4.96771	14.5758	0.000134633	0.00306417	23.21	51.6833	23.3	21.56	24.77	48.88	60.82	45.35
Baz1a	1.1269	2.66385	12.4547	0.000416939	0.00759428	0.67	1.60333	0.59	0.6	0.82	1.23	1.7	1.88
Casc5	1.12602	1.12986	9.3643	0.00221252	0.0302465	0.216667	0.466667	0.16	0.18	0.31	0.48	0.61	0.31
Plvap	1.12475	9.82809	8.00573	0.00466296	0.0552401	342.587	770.483	296.82	323.69	407.25	364.71	1127.14	819.6
Pbk	1.12428	2.6877	8.41056	0.00373048	0.0461624	3.25667	7.21	3.18	1.94	4.65	4.99	9.94	6.7
Ak5	1.12329	1.61866	5.51093	0.018898	0.153926	0.65	1.64	0.9	0.79	0.26	1.12	3	0.8
Mns1	1.1217	-0.0916461	7.18357	0.00735742	0.0782669	0.293333	0.693333	0.16	0.23	0.49	0.42	1.1	0.56
Chac2	1.12124	3.50963	13.2152	0.000277693	0.00558713	7.28	16.3333	7.23	8.29	6.32	14.59	15.34	19.07
Depdc1a	1.1202	1.55645	8.00501	0.0046648	0.0552401	0.786667	1.70667	0.94	0.54	0.88	2.15	2.28	0.69
4930486L24Rik	1.11865	2.74755	13.4088	0.000250453	0.00516366	3.22	7.51667	3.2	3.41	3.05	6.97	7.25	8.33
Slc43a2	1.11827	3.03562	12.9383	0.00032192	0.00624961	0.736667	1.71667	0.8	0.86	0.55	1.97	1.65	1.53
Cda	1.11823	3.8078	11.9729	0.000539798	0.00936069	15.4033	34.2467	15.22	16.54	14.45	35.85	24.79	42.1
Brca1	1.11809	0.0362625	5.0259	0.0249709	0.186935	0.0766667	0.22	0.04	0.14	0.05	0.18	0.4	0.08
Eps8	1.11758	5.35155	7.56755	0.00594287	0.0665759	6.73	15.4433	5.87	8.26	6.06	15.18	24.18	6.97
Foxp2	1.11663	3.29307	9.34971	0.00223021	0.0304225	1.06667	2.36667	1.24	0.92	1.04	1.68	1.85	3.57
Shmt1	1.11558	1.12645	6.54839	0.0104979	0.101708	0.61	1.63	0.46	0.92	0.45	0.56	2.32	2.01
Plekhf1	1.11457	2.82677	8.58244	0.00339421	0.042711	3.77	8.48667	3.74	2.68	4.89	5.08	8.27	12.11
Wfikkn1	1.11295	0.305773	5.04628	0.0246789	0.185756	0.343333	0.79	0.4	0.54	0.09	1.27	0.76	0.34
1520402A15Rik	1.11226	3.57545	12.6212	0.000381405	0.00707948	6.48667	14.81	6.87	7.27	5.32	13.17	13.7	17.56
Kif18b	1.11168	1.40271	5.52943	0.0186992	0.152916	0.53	1.28333	0.37	0.52	0.7	1.31	2.13	0.41
Rrm2	1.11167	2.54172	8.51893	0.00351471	0.0439279	1.98667	4.52667	1.84	1.44	2.68	2.65	6	4.93
Cxcl2	1.10947	2.60937	10.5303	0.0011743	0.0178457	3.96	9.1	4.03	4.23	3.62	10.01	11.58	5.71
S100a7a	1.10805	0.378308	9.06078	0.00261151	0.0346365	1.13333	2.77	0.62	1.25	1.53	2.22	3.82	2.27
Ifitm3	1.10387	10.2795	11.8493	0.000576839	0.00988119	2054.02	4441.92	2125.62	2238.43	1798	4164.75	3459.1	5701.92
Kif23	1.10136	3.48256	9.35242	0.00222691	0.0304104	2.16	5.05667	2.2	1.71	2.57	4.41	7.51	3.25
Cnrip1	1.10028	3.23169	10.9337	0.000944286	0.0149984	4.88	10.53	6.45	3.97	4.22	9.85	8.37	13.37
1110004E09Rik	1.1002	3.61576	8.61885	0.00332702	0.0419907	8.56	18.46	8.97	7.11	9.6	14.27	12.88	28.23
Kctd17	1.09758	5.16025	8.67853	0.0032198	0.0409643	17.06	37.4233	16.45	14.95	19.78	29.6	25.73	56.94
Tmem40	1.09745	0.925034	8.73584	0.00312015	0.0399373	1.30333	2.75667	1.27	1.06	1.58	2.06	2.3	3.91
Sap30	1.09365	2.53715	7.72654	0.0054415	0.0622258	4.1	8.81333	4.09	3.29	4.92	4.57	8.96	12.91
Slc16a9	1.09115	4.50031	10.7068	0.00106742	0.0165391	4.82	10.75	3.78	5.79	4.89	10.72	14.05	7.48
Cdc42ep2	1.08909	3.72102	12.7858	0.000349266	0.00668889	7.29333	16.4733	6.92	7.69	7.27	17.54	19.31	12.57
Gtse1	1.08901	1.20521	8.31144	0.00393961	0.0482783	0.6	1.32667	0.33	0.48	0.99	1.11	1.25	1.62
Synm	1.08898	3.50365	8.19899	0.00419136	0.0506283	1.12333	2.64	0.8	0.75	1.82	2.3	3.21	2.41
2210408F21Rik	1.08867	2.50869	12.3109	0.000450311	0.00810879	5.34333	11.28	6.06	4.78	5.19	10.86	8.73	14.25
Cks2	1.08786	2.99827	10.8659	0.000979519	0.0154225	11.7533	26.67	14.25	7.51	13.5	26.53	30.02	23.46
D2Ertd750e	1.0876	2.09125	7.24734	0.0071006	0.076695	1.02333	2.19667	1.33	0.71	1.03	1.83	3.5	1.26
Il2rg	1.0842	7.52989	12.2737	0.00045939	0.00822549	94.6867	205.243	94.96	98.61	90.49	160.21	209.29	246.23
Plekhb1	1.08177	3.3109	6.27115	0.0122719	0.113147	4.41667	9.62333	4.74	4.62	3.89	8.84	4.02	16.01
Mki67	1.07998	3.28895	6.46984	0.0109721	0.10516	0.666667	1.50667	0.86	0.42	0.72	1.48	2.38	0.66
Hey1	1.07726	3.43853	12.131	0.000495912	0.00873122	3.89333	8.54	3.61	3.7	4.37	6.91	9.87	8.84
Reep1	1.0772	2.21485	5.9594	0.0146391	0.126929	0.893333	1.97333	1.09	0.5	1.09	1.19	1.35	3.38
4632434I11Rik	1.07664	0.579241	8.71681	0.0031529	0.0403157	0.33	0.673333	0.39	0.35	0.25	0.42	1	0.6
Slc6a9	1.07457	2.91713	4.17689	0.0409789	0.260287	1.71333	3.71333	1.87	1.29	1.98	2.28	1.29	7.57
Zfp69	1.07421	2.91298	10.1676	0.00142929	0.0211125	1.34667	3.09667	1.26	1.47	1.31	2.44	2.69	4.16
Pde10a	1.07161	1.20974	7.62838	0.0057457	0.0649061	0.203333	0.43	0.25	0.21	0.15	0.61	0.52	0.16
Ubtd1	1.07072	3.95873	9.50045	0.00205421	0.0283271	8.31	17.8433	8.53	7.21	9.19	13.47	15	25.06
Ccdc18	1.06986	0.726294	7.62619	0.00575267	0.0649061	0.17	0.416667	0.15	0.21	0.15	0.53	0.49	0.23
Mapk11	1.06945	3.58634	11.959	0.000543846	0.00940513	3.65333	7.65667	3.42	3.66	3.88	6.46	9.88	6.63
Psen2	1.06488	6.14347	11.1377	0.00084592	0.0136588	27.4967	59.1033	31.45	23.83	27.21	70.55	43.42	63.34
Traip	1.06361	0.515927	7.65914	0.00564854	0.0640725	0.283333	0.666667	0.2	0.44	0.21	0.58	0.88	0.54
2700099C18Rik	1.06066	0.843469	10.4502	0.00122636	0.0185036	0.596667	1.19333	0.68	0.39	0.72	1.42	1.7	0.46
Uchl4	1.06042	0.605035	7.34404	0.00672855	0.0735551	0.353333	0.646667	0.44	0.49	0.13	0.64	0.48	0.82
Dyx1c1	1.06004	0.117335	4.69492	0.0302519	0.213824	0.266667	0.58	0.31	0.26	0.23	0.54	0.43	0.77
Egfl8	1.05999	2.15502	10.9076	0.000957699	0.0151544	1.70667	5.30333	1.85	1.91	1.36	3.56	5.27	7.08
Cfb	1.05919	6.64603	11.42	0.000726575	0.0120075	27.9633	61.3633	28.85	28.48	26.56	46.4	79.86	57.83
Gins2	1.05837	2.03895	8.69489	0.00319103	0.0406801	2.44667	6.26667	2.44	2.24	2.66	4.6	4.07	10.13
Pgm1	1.05755	5.10966	9.60666	0.00193873	0.0269993	11.6867	25.06	12.49	10.98	11.59	18.09	21.35	35.74
Cenpe	1.05505	2.53378	11.334	0.000761003	0.0124949	0.456667	1.04667	0.49	0.41	0.47	1.08	1.19	0.87
Dach1	1.05465	0.621758	4.01742	0.0450327	0.275662	0.223333	0.486667	0.34	0.2	0.13	0.38	0.93	0.15
Nebl	1.05416	3.29092	6.10328	0.0134931	0.120373	2.19333	4.89667	2.19	3.21	1.18	5.89	6.49	2.31
Rcan1	1.05348	7.47511	11.9848	0.000536355	0.00932654	64.9467	138.477	57.31	65.74	71.79	124.79	128.06	162.58
Rn4.5s	1.05192	2.70236	10.1565	0.00143795	0.0212157	5.47	9.47333	4.98	8.39	3.04	10.99	7.63	9.8
Emcn	1.05028	8.29484	11.8716	0.000569952	0.00978972	184.56	392.263	167.21	164.79	221.68	350.93	454.41	371.45
Cdc20	1.04716	3.76376	10.8214	0.00100335	0.0156808	6.06667	13.0633	5.82	5.09	7.29	11.94	16.01	11.24
Ret	1.04699	3.74532	10.5662	0.00115176	0.0176088	1.40667	3.03333	1.16	1.35	1.71	2.42	4.03	2.65
Nrxn3	1.04174	1.30662	6.13428	0.0132585	0.118867	0.166667	0.393333	0.18	0.24	0.08	0.44	0.27	0.47
Ces2e	1.04057	1.98946	7.2624	0.0070413	0.0763149	1.31	2.75	1.56	1.1	1.27	1.58	4.7	1.97
Tbxa2r	1.03109	3.08944	4.09259	0.0430717	0.268858	3.34	6.97	3.95	2.02	4.05	4.09	3.12	13.7
Tgfbi	1.03029	5.09442	6.40323	0.0113913	0.107533	10.1733	21.08	13.33	8.26	8.93	15.74	13.09	34.41
Stox2	1.02996	3.56243	9.69796	0.00184473	0.0258788	0.846667	1.86667	0.85	0.91	0.78	1.94	2.46	1.2
Cxx1a	1.02615	6.63829	10.4528	0.00122464	0.0184997	41.9833	92.7733	42.24	35.95	47.76	76.51	80.74	121.07
Sema5b	1.02411	0.246908	6.01669	0.0141712	0.124062	0.0266667	0.19	0.01	0.03	0.04	0.17	0.4	0
Smc2	1.02279	4.34776	11.6536	0.000640774	0.010801	2.72333	5.71	2.79	2.78	2.6	4.76	6.35	6.02
Panx1	1.02239	2.78523	6.98837	0.00820411	0.0851277	2.60333	5.64	2.33	2.25	3.23	2.75	6.92	7.25
Iqgap3	1.02198	1.49862	6.1758	0.0129509	0.116917	0.31	0.68	0.12	0.23	0.58	0.64	1.03	0.37
Zfp521	1.02198	5.54784	6.94433	0.00840852	0.0866804	5.88667	12.3567	5.56	7.31	4.79	14.35	17.11	5.61
Tlcd2	1.02051	3.46688	11.0192	0.000901729	0.0144677	3.94	9.02333	4.48	3.48	3.86	6.61	10.13	10.33
Cmtm8	1.01991	3.05126	9.63881	0.00190508	0.0266186	6.68	14.0633	5.23	7.09	7.72	11.93	12.59	17.67
1700109F18Rik	1.00892	1.00828	5.52674	0.018728	0.152953	1.13333	1.81333	1.13	0.99	1.28	1.01	1.63	2.8
2700023E23Rik	1.00779	2.13506	8.83571	0.00295392	0.0382207	3.58	7.44667	3.47	4.68	2.59	5.73	8.52	8.09
Gimap6	1.00605	7.92053	10.2343	0.00137854	0.0204104	128.75	266.327	139.27	143.93	103.05	209.64	277.83	311.51
Marcks	1.00351	5.52515	6.72933	0.00948403	0.0952844	8.52667	17.54	7.51	7.79	10.28	9.69	17.59	25.34
Insr	1.00337	4.51105	9.97866	0.00158365	0.0228591	1.72333	3.67667	1.87	1.49	1.81	4.47	3.89	2.67
A330069E16Rik	1.00286	0.558809	8.9309	0.00280387	0.0366297	1.1	2.56333	0.86	1.12	1.32	2.33	2.33	3.03
Cxx1b	1.00184	6.50149	10.092	0.00148912	0.0218432	38.3433	77.3133	38.89	33.93	42.21	64.86	73.44	93.64
Ifitm1	0.999833	2.6972	9.7703	0.00177354	0.0251132	0.586667	1.71333	0.38	0.54	0.84	0.92	1	3.22
Gm13483	0.998626	0.318497	3.86706	0.0492428	0.292021	0.9	2.16333	0.88	1.66	0.16	3.72	1.67	1.1
Tnfrsf11a	0.99584	3.89234	8.06546	0.00451169	0.0539826	2.17333	4.43333	2.54	1.32	2.66	4.17	5.6	3.53
Mir5107	0.995151	6.46487	10.0705	0.00150661	0.0219978	0	0	0	0	0	0	0	0
Gm5617	0.994832	1.71315	7.68892	0.00555609	0.0631936	5.38333	11.21	4.88	4.97	6.3	8.06	10.09	15.48
Zbp1	0.993906	2.85394	6.31822	0.0119504	0.11152	6.69	14.8767	7.57	9.02	3.48	12.46	11.01	21.16
Sept1	0.993527	0.52579	4.74717	0.0293465	0.208941	0.723333	1.58333	0.73	0.75	0.69	1.08	0.74	2.93
Mustn1	0.993499	6.24816	8.05259	0.00454385	0.0541626	56.5133	114.56	65.63	41.25	62.66	83.79	103.74	156.15
Fam55d	0.993133	4.10361	8.53471	0.00348438	0.0438021	3.95667	8.30667	4.83	4.7	2.34	9.02	9.15	6.75
4833419F23Rik	0.992576	0.361193	5.78787	0.0161371	0.137008	1.06667	2.16	1.14	1.09	0.97	1.55	0.99	3.94
Acot7	0.989134	4.75617	8.37758	0.00379878	0.0469158	15.38	30.37	15.69	14.83	15.62	20.8	28.32	41.99
Tpx2	0.988793	2.90326	9.52045	0.00203195	0.0280552	1.35	2.80333	1.69	1.19	1.17	2.64	3.51	2.26
Mgmt	0.988445	1.71884	7.85007	0.00508188	0.0589657	3.61667	7.44333	4.45	2.77	3.63	6.2	6.51	9.62
S100a10	0.987575	7.99672	9.27816	0.00231902	0.0314078	436.87	876.717	455.12	382.86	472.63	836.36	663.98	1129.81
Elovl4	0.986431	2.65886	7.12024	0.00762183	0.0802035	1.73667	3.49333	2.12	1.83	1.26	3.36	5.12	2
Rasl10a	0.986228	1.78617	5.79372	0.0160835	0.136921	1.55333	4.19667	1.66	1.59	1.41	2.73	2.93	6.93
Smox	0.985799	3.37186	5.63675	0.0175878	0.146572	3.86667	8.29667	3.44	3.13	5.03	5	5.91	13.98
Usp18	0.984016	4.54806	7.61274	0.00579574	0.065313	10.31	21.3333	11.84	9.67	9.42	15.7	15.64	32.66
Snhg12	0.982244	1.26391	8.76211	0.00307553	0.0394459	2.98	5.94	3.75	2.02	3.17	5.36	5.92	6.54
Efemp1	0.981243	8.5186	7.27251	0.00700179	0.0760317	155.21	318.377	175.08	161.14	129.41	392.04	402.69	160.4
Plce1	0.980747	1.73545	4.53676	0.0331743	0.226354	0.236667	0.496667	0.27	0.18	0.26	0.28	0.24	0.97
Fam69b	0.98065	1.01514	4.89881	0.0268751	0.196411	1.03333	2.07	1.04	0.75	1.31	1.22	1.28	3.71
Vcan	0.980221	2.97307	10.558	0.00115689	0.0176447	0.936667	1.68333	0.9	0.79	1.12	1.34	1.95	1.76
AI413582	0.980167	4.83208	6.8784	0.00872437	0.089066	44.96	90.0033	45.44	43.57	45.87	65.75	60.84	143.42
Prc1	0.979735	4.31252	6.30083	0.0120682	0.112299	5.21667	10.75	5.49	3.66	6.5	9.34	16.79	6.12
Pcdhb12	0.978601	0.602454	7.70235	0.00551491	0.0628382	0.376667	0.796667	0.46	0.46	0.21	0.57	1.07	0.75
2210404O07Rik	0.977452	1.27517	6.09315	0.0135707	0.12081	2.05667	3.97667	2.04	2.41	1.72	4.38	5.74	1.81
Cd74	0.976878	9.15277	9.56978	0.00197807	0.0274565	395.107	810.1	380.87	503.55	300.9	825.44	936.24	668.62
Cdkn3	0.975149	1.19562	8.77706	0.00305043	0.0391637	1.92667	3.80333	2.22	1.29	2.27	3.75	4.34	3.32
Tram1l1	0.974527	2.39809	8.81527	0.0029872	0.0385082	2.04	4.18333	1.98	2.33	1.81	3.74	5.7	3.11
Uchl3	0.969469	4.07784	6.62406	0.010061	0.0994557	16.5167	33.01	15.56	17.05	16.94	26.48	20.73	51.82
9230116N13Rik	0.968672	0.57221	7.67843	0.00558847	0.0635049	0.303333	0.836667	0.48	0.32	0.11	0.91	0.64	0.96
Myc	0.968498	4.54691	10.5703	0.00114917	0.0175906	7.97667	15.9733	7.33	7.37	9.23	15.94	15.51	16.47
Mir3074-1	0.96779	0.581573	6.64333	0.00995278	0.0986964	2.74667	0	0	0	8.24	0	0	0
Prelp	0.966945	7.03159	5.55245	0.0184548	0.151406	29.7633	58.7267	33.86	19.06	36.37	44.12	38.21	93.85
Sord	0.966888	5.19709	8.53074	0.00349198	0.0438541	13.6233	27.35	15.52	13.43	11.92	18.21	30.2	33.64
Nfkbie	0.966631	3.6036	8.93694	0.0027946	0.0365577	3.88	7.98333	3.11	3.57	4.96	6.33	8.62	9
Il6	0.966232	1.55	4.41547	0.0356144	0.236043	2.30667	4.55333	3.14	0.78	3	4.17	5.89	3.6
Fam70a	0.965696	1.54468	4.63757	0.0312794	0.21751	0.686667	1.36333	0.66	0.61	0.79	1.11	2.45	0.53
Asb4	0.964464	2.28624	7.46043	0.00630698	0.0699738	1.15	2.32667	1.17	1.2	1.08	2.78	2.88	1.32
Mpzl1	0.962682	6.06711	7.83938	0.00511202	0.0591527	24.3833	48.4933	25.17	19.33	28.65	38.66	40.02	66.8
Arid5a	0.962623	5.29478	7.54335	0.00602318	0.0672376	5.31667	10.6533	4.36	4.47	7.12	8.49	9.39	14.08
Ripply3	0.962489	3.07867	9.98352	0.00157947	0.0228567	4.88	9.70667	5.54	4.99	4.11	8.38	10.6	10.14
Sgol1	0.962315	1.21317	7.86157	0.00504964	0.0588113	0.47	0.983333	0.51	0.39	0.51	0.81	1.36	0.78
Cenpf	0.959917	2.79575	8.70009	0.00318194	0.040605	0.43	0.893333	0.5	0.33	0.46	0.74	1.22	0.72
Fabp5	0.958472	5.49994	9.46025	0.00209972	0.0288917	44.09	90.0167	49.75	32.19	50.33	94.97	96.53	78.55
Egflam	0.958116	1.3102	4.40446	0.035845	0.237199	0.38	0.77	0.43	0.27	0.44	0.25	0.62	1.44
E530011L22Rik	0.956458	0.561426	7.17624	0.00738753	0.0784553	0.17	0.203333	0.16	0.23	0.12	0.34	0.12	0.15
Ccdc107	0.954972	5.22427	9.43914	0.00212403	0.0291944	39.05	75.0367	44.37	32.79	39.99	66.22	65.92	92.97
Itprip	0.953903	5.0842	9.15426	0.0024814	0.0333108	7.22	14.33	6.41	7.99	7.26	11.76	13.32	17.91
D030028A08Rik	0.953235	1.67514	6.21437	0.0126718	0.115404	0.666667	1.38333	0.51	0.76	0.73	1.44	0.73	1.98
Timp1	0.952852	3.7108	9.71399	0.0018287	0.0257217	14.57	28.44	14.7	13.48	15.53	26.81	24.85	33.66
Top2a	0.951661	3.53156	4.44264	0.035052	0.234338	1.63333	3.34	1.41	1.41	2.08	4.07	4.89	1.06
Tshz3	0.949658	2.11605	8.52442	0.00350413	0.0439196	0.68	1.33667	0.89	0.61	0.54	1.32	1.56	1.13
Serpina3g	0.949077	4.57207	5.16027	0.0231094	0.177496	8.8	18.0633	5.93	14.88	5.59	15.01	26.32	12.86
Gypc	0.948731	6.06508	8.97977	0.00272986	0.035885	26.6533	52.57	27.91	27.26	24.79	40.94	49.37	67.4
Sgsm1	0.948588	2.33768	6.58506	0.0102838	0.100495	0.82	1.59	0.82	0.71	0.93	0.92	1.59	2.26
Slc2a6	0.947569	0.82985	7.85194	0.00507662	0.0589586	0.616667	1.38333	0.55	0.49	0.81	1.27	1.74	1.14
Mkrn3	0.946422	1.94453	4.45745	0.0347493	0.233377	1.26333	2.52333	1.13	1.91	0.75	1.53	1.79	4.25
AI607873	0.944663	0.269155	4.2763	0.0386475	0.249611	0.133333	0.226667	0.14	0.11	0.15	0.47	0.17	0.04
Gm4532	0.940207	0.591204	7.42137	0.00644537	0.0711971	2.14	4.48333	2.64	2.35	1.43	4.76	4.29	4.4
Fosl1	0.938279	1.69214	7.27216	0.00700316	0.0760317	0.366667	1.26333	0.2	0.49	0.41	1.16	1.77	0.86
Tead4	0.937794	1.84306	7.49288	0.00619435	0.068966	0.833333	1.61333	1.16	0.73	0.61	1.66	1.83	1.35
Abcg2	0.936245	7.42853	8.44598	0.00365851	0.045405	56.2933	111.71	58.49	61.97	48.42	87.87	153.47	93.79
Cenpa	0.936238	3.73278	9.20994	0.00240705	0.0324353	7.36667	14.0133	7.66	6.2	8.24	11.87	13.79	16.38
Nfil3	0.93477	3.91501	6.42225	0.01127	0.106866	6.59	12.8567	5.94	4.77	9.06	8.21	15.3	15.06
Tc2n	0.927271	2.83549	5.06849	0.0243645	0.1842	2.54333	4.90333	3.06	2.45	2.12	4.24	2.41	8.06
Rpp38	0.926807	2.61553	7.61167	0.00579918	0.065313	5.55667	11.0133	5.87	5.83	4.97	10.78	7.65	14.61
Myo7a	0.926162	3.36922	7.4479	0.00635105	0.0703394	1.02667	2.01333	0.94	1.06	1.08	1.39	1.84	2.81
Capg	0.922405	7.50141	9.70695	0.00183573	0.0257919	135.643	260.593	137	128.97	140.96	231.53	251.57	298.68
1810032O08Rik	0.921691	1.96739	7.22025	0.00720857	0.0773829	2.81667	5.88	2.94	3.11	2.4	4.03	7.07	6.54
Sgip1	0.921623	2.0657	5.55989	0.0183766	0.150862	0.676667	1.15667	0.5	0.97	0.56	1.27	1.69	0.51
Mir24-1	0.919192	0.44484	6.1176	0.0133842	0.119717	0	0	0	0	0	0	0	0
Cecr2	0.918983	1.14758	4.54814	0.0329545	0.22562	0.163333	0.313333	0.19	0.24	0.06	0.3	0.38	0.26
Serpina3h	0.918247	0.863389	6.05975	0.0138297	0.121915	0.0633333	0.17	0.02	0.05	0.12	0.42	0.07	0.02
N4bp3	0.917837	5.07469	5.60266	0.0179333	0.148474	10.8467	21.02	17.81	7.87	6.86	20.67	17.28	25.11
Ccnjl	0.917786	0.433496	5.30692	0.0212409	0.166597	0.396667	0.75	0.41	0.28	0.5	0.7	0.42	1.13
Fxn	0.916005	2.03535	5.79073	0.0161109	0.137002	3.15667	5.96333	3.89	2.29	3.29	4.99	3.76	9.14
Rsad2	0.915465	2.92173	7.65692	0.0056555	0.064094	1.60333	3.12333	1.39	1.29	2.13	3.33	2.47	3.57
Sema6b	0.914875	3.13778	6.75127	0.00936809	0.0943442	1.58667	3.21	0.95	1.45	2.36	2.61	2.99	4.03
Tmem191c	0.914426	1.47803	6.63306	0.0100103	0.0991555	0.896667	1.94667	0.78	0.91	1	1.15	2.25	2.44
AI662270	0.911175	0.373528	5.50892	0.0189197	0.153926	0.77	1.57333	0.9	0.95	0.46	2.24	1.38	1.1
Nbl1	0.910995	6.47437	5.16076	0.0231027	0.177496	43.7333	84.0133	42.43	43.35	45.42	44.84	70.64	136.56
Kif2c	0.910652	1.18803	4.96574	0.0258543	0.191846	0.616667	1.24	0.49	0.35	1.01	1.04	1.81	0.87
Cnksr1	0.909728	1.21775	7.74073	0.00539889	0.0620186	0.693333	1.40667	0.65	0.55	0.88	1.26	1.77	1.19
Aurka	0.90765	2.39357	8.19207	0.00420739	0.0507477	2.27	4.52333	1.84	1.94	3.03	4.2	4.86	4.51
2900010M23Rik	0.906814	5.2679	5.72195	0.0167541	0.140985	102.267	189.28	100.97	91.42	114.41	153.86	120.61	293.37
Cldn5	0.906525	8.36707	7.92634	0.00487203	0.0572655	213.657	406.727	261.22	177.29	202.46	332	373.55	514.63
Akap12	0.904586	3.43027	5.4933	0.0190895	0.155105	1.30333	2.42667	1.28	1.06	1.57	2	1.57	3.71
Nek2	0.90385	2.02608	4.39663	0.0360101	0.238043	1.05333	2.11	1.02	0.83	1.31	1.73	3.7	0.9
Pigx	0.903744	4.90239	7.14096	0.00753429	0.0797463	28.7567	55.0233	28.74	27.46	30.07	43.34	44.96	76.77
Smad1	0.902675	6.44277	6.58426	0.0102884	0.100495	24.1	45.66	23.55	25.61	23.14	29.93	41.5	65.55
Nudt14	0.902458	3.63392	7.8321	0.00513263	0.059337	14.4967	27.94	17.66	13.17	12.66	25.14	23.35	35.33
Lmna	0.902371	8.5206	6.03834	0.0139984	0.122974	115.64	224.18	102.14	94.82	149.96	147.53	203.93	321.08
Hoxd8	0.90095	4.28108	5.09493	0.0239959	0.182606	10.25	19.6933	10.43	8.56	11.76	8.94	21.44	28.7
Endou	0.899336	0.64875	5.65117	0.0174438	0.14566	0.456667	0.98	0.65	0.29	0.43	1.13	1.17	0.64
Hells	0.899245	0.954926	7.17365	0.00739821	0.0785029	0.43	0.85	0.41	0.48	0.4	0.6	0.8	1.15
Dcbld2	0.899075	3.83549	8.60549	0.00335151	0.0422578	1.72333	3.29	1.72	1.42	2.03	2.83	3.45	3.59
Hist1h2bn	0.896237	2.13424	6.94555	0.0084028	0.0866804	0.303333	0.116667	0.91	0	0	0	0.2	0.15
Xrcc6bp1	0.893131	1.31766	5.44808	0.0195898	0.158155	1.93333	4.11333	1.5	1.95	2.35	2.67	3.13	6.54
Mex3b	0.892848	0.653569	6.23225	0.0125444	0.114639	0.376667	0.73	0.39	0.49	0.25	0.63	0.63	0.93
Immp2l	0.890604	1.73555	5.94238	0.014781	0.127897	2.66667	4.78333	3.33	2.72	1.95	4.17	3.19	6.99
Dixdc1	0.889437	3.36264	4.62752	0.031463	0.21818	1.25	2.51	1.39	1.37	0.99	2.51	4.08	0.94
Lgmn	0.888786	8.11868	7.85617	0.00506477	0.058875	130.12	248.007	149.65	153.01	87.7	264.11	266.41	213.5
Zfp941	0.887814	2.63709	7.69809	0.00552793	0.0629299	0.156667	0.303333	0.06	0.28	0.13	0.41	0.27	0.23
Mfap2	0.886224	4.61925	4.94356	0.0261881	0.193303	21.55	40.55	20.97	20.41	23.27	30.39	24.1	67.16
Snhg9	0.885574	0.624231	7.13571	0.00755639	0.0798467	19.9133	37.23	21.85	19.15	18.74	36.46	45.38	29.85
C77080	0.88504	2.83428	8.32082	0.00391931	0.0480761	1.04333	2.10333	1.12	0.82	1.19	2.12	2.13	2.06
Diap3	0.884999	0.458598	6.8338	0.00894488	0.0908843	0.226667	0.5	0.22	0.21	0.25	0.49	0.62	0.39
Syne1	0.884791	4.91331	9.27541	0.0023225	0.0314109	2.97333	6.01667	3.05	3.06	2.81	6.35	6.11	5.59
Kif18a	0.882136	1.67146	6.57736	0.0103284	0.100663	0.7	1.37667	0.85	0.73	0.52	0.85	1.74	1.54
Calm2	0.88089	9.12708	6.95628	0.00835256	0.0864097	442.067	830.973	452.25	402.5	471.45	713.92	629.14	1149.86
Dbndd2	0.879382	6.2906	7.63767	0.00571617	0.0646658	17.9467	33.9667	18.41	16.11	19.32	27.44	31.56	42.9
Aspm	0.879238	1.35924	5.31303	0.0211665	0.16622	0.193333	0.37	0.22	0.14	0.22	0.28	0.6	0.23
Krt18	0.878202	7.06618	8.34861	0.00385983	0.0474846	85.94	163.017	71.66	86.34	99.82	143.66	178.34	167.05
Gm10345	0.877776	2.95896	6.88025	0.00871534	0.0890456	1.79667	4.78	1.73	1.72	1.94	2.99	5.42	5.93
Cyb5	0.877196	8.51768	6.4764	0.0109316	0.105075	517.237	959.63	533.8	502.15	515.76	851.82	656.77	1370.3
Gm5972	0.874027	1.90372	6.25771	0.0123654	0.113843	0.433333	0.75	0.38	0.42	0.5	0.65	0.66	0.94
Pitpnc1	0.872781	4.09225	7.51991	0.00610209	0.0680584	2.07667	3.87	2.2	2.08	1.95	3.4	3.26	4.95
Kpna2	0.871846	5.79502	8.09498	0.00443881	0.0531607	24.7667	46.4233	28.07	19.87	26.36	39.66	49.25	50.36
Adam22	0.87111	2.15152	7.59704	0.00584643	0.0655536	0.193333	0.456667	0.21	0.21	0.16	0.31	0.65	0.41
Ppp1r2	0.870909	8.28845	7.19178	0.00732383	0.0781635	66.5167	122.68	74.57	61.58	63.4	103.65	100.96	163.43
Rassf7	0.869738	2.14837	6.40554	0.0113765	0.107533	2.40667	4.62667	2.27	2.19	2.76	4.22	3.23	6.43
Abi3bp	0.869226	5.0333	6.64816	0.00992583	0.0986272	5.46333	9.92	7.28	4.04	5.07	8.52	8.23	13.01
Grina	0.868911	7.27835	8.86447	0.00290775	0.0377531	81.9	152.45	84.13	84.48	77.09	132.55	168.95	155.85
Ndufs8	0.867744	6.47366	6.28523	0.0121748	0.112523	81.8333	152.723	84.49	75.59	85.42	131.75	106.79	219.63
Gm16516	0.867741	1.25634	6.45293	0.011077	0.105691	1.67667	3.21	2.39	1.59	1.05	3.52	2.64	3.47
Tyms	0.867621	3.97488	7.10142	0.00770227	0.0809154	3.32	6.34667	3.52	3.49	2.95	5.29	5.26	8.49
Sncg	0.867166	6.91989	8.97993	0.00272962	0.035885	170.91	315.737	182.53	178.5	151.7	321.22	302.34	323.65
Ect2	0.866279	2.52006	4.84533	0.027721	0.200641	1.18	2.22667	1.31	0.99	1.24	2.53	3.17	0.98
Dctpp1	0.864086	2.99594	6.8081	0.00907453	0.0919732	13.9967	25.8567	13.47	12.81	15.71	21.5	22.53	33.54
Eda2r	0.863098	2.04895	6.83366	0.00894556	0.0908843	1.13	2.48667	1.3	1.26	0.83	2.44	2.11	2.91
Fah	0.862012	4.12757	5.7554	0.016438	0.139097	9.78667	17.9	9.2	9.51	10.65	13.66	13	27.04
Plk2	0.861209	7.93718	7.60494	0.00582087	0.0653248	74.28	139.847	67.63	91.37	63.84	124.4	174.09	121.05
Lyrm1	0.860928	2.49667	5.14211	0.0233523	0.178574	3.58667	7.17	3.42	3.58	3.76	4.66	5.77	11.08
Ly6a	0.86077	10.531	8.6512	0.00326846	0.0414168	1826.72	3394.66	1829.77	2055.53	1594.85	3804.37	3480.93	2898.67
Klrg2	0.860129	1.62663	5.11278	0.0237503	0.181117	1.08667	1.93667	0.88	1.42	0.96	1.21	2.85	1.75
Cenpk	0.857874	0.91264	7.05324	0.0079122	0.0825726	1.20333	2.42667	1.25	1.08	1.28	2.56	2.66	2.06
Mrps6	0.856574	5.0339	7.4494	0.00634577	0.0703394	46.5033	84.3033	53.92	41.2	44.39	97.62	61.94	93.35
Mcts2	0.855667	1.85622	6.41369	0.0113244	0.107302	4.39667	8.62	4.57	5.21	3.41	8.7	6.45	10.71
Dbf4	0.855447	1.26111	6.91541	0.00854561	0.0876652	0.826667	1.58667	0.93	0.82	0.73	1.6	1.89	1.27
Hspa4l	0.854583	5.09058	8.59599	0.00336904	0.0424365	7.51333	13.9933	7.57	7.23	7.74	12.61	16.09	13.28
Rps4y2	0.85212	4.09947	7.21479	0.00723051	0.0774374	18.0767	33.66	15.3	18.01	20.92	28.05	31.47	41.46
Psmc3ip	0.852109	2.1166	6.32213	0.011924	0.11148	2.5	6.06667	2.92	2.18	2.4	4.61	4.68	8.91
Cyth4	0.849206	2.84099	8.0471	0.00455766	0.0542142	2.06333	3.86333	1.79	2.2	2.2	3.89	3.66	4.04
Nr1h3	0.848362	4.34382	4.06844	0.0436917	0.271328	9.04667	17.17	8.16	8.34	10.64	9.37	11.66	30.48
Lck	0.847145	1.88668	6.93919	0.00843271	0.0867178	1.38667	2.73	1.33	1.73	1.1	3.03	2.55	2.61
Rad51ap1	0.845821	0.668046	4.72461	0.029734	0.211106	0.66	1.29333	0.66	0.54	0.78	0.7	1.72	1.46
Vmn1r90	0.843178	0.725088	4.9967	0.0253957	0.18922	0.25	0.43	0.3	0.28	0.17	0.4	0.57	0.32
4931440P22Rik	0.842633	0.77441	4.28857	0.0383695	0.24845	0.15	0.39	0.17	0.11	0.17	0.25	0.29	0.63
Lmo1	0.841657	3.58329	5.63363	0.0176191	0.146693	9.97333	17.91	9.86	8.38	11.68	11.15	19.23	23.35
Cenpq	0.840985	2.5203	7.49803	0.00617664	0.0688293	3.53667	6.68333	3.98	3.18	3.45	6.01	6.36	7.68
Fignl1	0.839749	1.78611	6.5758	0.0103375	0.100663	1.03333	1.90333	0.91	0.83	1.36	1.69	2.15	1.87
Cd9	0.838496	10.597	6.96913	0.00829276	0.0859067	1238.97	2258.42	1334.74	1160.75	1221.43	2000.18	1820.26	2954.82
Gm10069	0.838345	1.2695	6.06805	0.0137649	0.121598	0.206667	0.323333	0.18	0.13	0.31	0.17	0.27	0.53
Hvcn1	0.8378	1.96151	4.95645	0.0259935	0.192428	0.72	1.82667	0.65	0.81	0.7	1.39	1.02	3.07
Rnf207	0.837706	1.23794	5.37916	0.0203787	0.162222	0.2	0.72	0.17	0.2	0.23	0.44	0.58	1.14
Ip6k2	0.836658	2.37713	6.93249	0.00846439	0.0869024	1.13	2.02333	1.03	1.3	1.06	1.73	2.39	1.95
Cep70	0.834826	3.72571	7.22328	0.00719642	0.0773829	3.12667	6.09667	3.36	3.52	2.5	6.3	6.66	5.33
Hmga1	0.834256	4.20873	7.70498	0.00550687	0.0628032	3.90667	8.61333	3.7	4.52	3.5	9.78	5.26	10.8
Hmga1-rs1	0.833914	4.2015	7.72955	0.00543242	0.0622258	6.16333	9.71667	6.41	4.93	7.15	5.26	14.8	9.09
Cdh13	0.833079	10.0268	8.39119	0.00377045	0.0466114	388.24	715.317	403.99	371.79	388.94	730.45	797.71	617.79
Rnmtl1	0.832072	2.84369	6.44682	0.0111151	0.105874	4.16667	7.75333	5.4	3.45	3.65	7.1	6.08	10.08
Maml3	0.831091	1.0029	6.32085	0.0119327	0.11148	0.233333	0.436667	0.22	0.28	0.2	0.56	0.4	0.35
Tax1bp3	0.830721	7.15723	5.86322	0.0154605	0.13267	97.6433	177.287	96.54	84.93	111.46	144.39	137.18	250.29
Prkar2b	0.830367	1.90655	6.36046	0.0116691	0.109747	0.933333	1.79	1.26	0.87	0.67	2.01	1.77	1.59
Kif4	0.830329	1.29978	5.34567	0.0207738	0.163848	0.386667	0.763333	0.29	0.43	0.44	0.72	1.06	0.51
Gimap9	0.830262	4.17365	6.74386	0.00940711	0.0945867	11.6233	21.4533	12.24	12.09	10.54	16.93	20.6	26.83
Tmem37	0.826878	1.26512	6.05533	0.0138644	0.122136	2.38	4.21333	2.16	2.1	2.88	3.38	5.35	3.91
Ifi203	0.826071	4.75153	5.70572	0.0169097	0.141949	4.71667	8.64	5.59	4.76	3.8	10.07	10.78	5.07
Slc12a2	0.826001	4.29701	5.23503	0.0221364	0.171812	2.47667	4.58333	2.01	2.31	3.11	3.72	6.98	3.05
Ndc80	0.825632	1.58947	4.90221	0.0268223	0.196411	1.16667	2.15333	1.19	0.92	1.39	1.35	3.6	1.51
Arl5c	0.824723	0.389334	4.75081	0.0292844	0.208734	0.68	1.25333	0.69	0.78	0.57	1.12	1.01	1.63
Eif4ebp1	0.824394	5.89348	5.25588	0.0218728	0.170392	61.8067	111.577	58.69	53.88	72.85	84.27	83.72	166.74
Vamp5	0.823691	5.24316	5.03821	0.0247942	0.186383	20.3	36.8267	19.94	19.05	21.91	27.24	26.06	57.18
Anxa1	0.822991	8.4884	7.46382	0.00629511	0.0699034	229.893	428.157	236.98	221.89	230.81	348.33	416.37	519.77
Tnfsf9	0.822848	1.46951	6.29104	0.012135	0.11243	2.08667	3.89	1.81	1.85	2.6	4.29	3.3	4.08
Kif26b	0.821376	0.46691	5.24383	0.0220247	0.171365	0.116667	0.25	0.15	0.09	0.11	0.28	0.19	0.28
E130306D19Rik	0.820681	1.09949	3.98643	0.0458681	0.278848	0.843333	1.67	0.61	0.85	1.07	1.39	2.63	0.99
Gm15471	0.820321	0.883123	4.63516	0.0313232	0.21751	0.05	0.39	0	0	0.15	0.08	0.07	1.02
Exo1	0.819141	0.311507	4.34735	0.0370667	0.242691	0.153333	0.303333	0.12	0.16	0.18	0.22	0.2	0.49
Hs3st1	0.818649	8.63637	8.24689	0.00408218	0.0494511	220.457	399.947	234.76	223.82	202.79	413.11	418.64	368.09
Dlgap5	0.818372	1.05923	6.24126	0.0124807	0.11456	0.543333	0.99	0.65	0.43	0.55	0.95	1.02	1
Hist1h2bh	0.818072	1.64338	6.57667	0.0103324	0.100663	0	0.136667	0	0	0	0	0.41	0
Prkcz	0.815664	4.05483	6.2336	0.0125349	0.114639	3.26333	5.86	3.28	3.34	3.17	5.01	4.86	7.71
2810008D09Rik	0.813664	4.46265	6.1804	0.0129173	0.1168	44.5433	76.38	54.76	50.29	28.58	66.06	78.28	84.8
Hsd3b7	0.813245	7.5943	6.16761	0.013011	0.117145	95.1	170.76	96.15	95.18	93.97	127.01	153.85	231.42
Mn1	0.812323	2.44296	5.32923	0.0209706	0.165194	0.72	1.30667	0.8	0.46	0.9	1.18	1.13	1.61
Ccdc56	0.812231	6.26898	4.76403	0.0290604	0.208074	118.33	210.917	114.57	108.86	131.56	165.39	142.22	325.14
Map3k8	0.811922	4.54071	6.34401	0.0117779	0.110523	7.99667	14.56	8.28	8.01	7.7	10.52	19.98	13.18
Nudt4	0.809595	7.82142	6.09984	0.0135195	0.120438	62.12	112.55	72.87	54.41	59.08	101.2	156.89	79.56
Casz1	0.809533	1.53884	6.23329	0.012537	0.114639	0.28	0.423333	0.26	0.3	0.28	0.47	0.38	0.42
Bola1	0.808523	3.41842	6.00978	0.0142268	0.124462	13.7867	26.1667	15.31	14.2	11.85	23.45	19.38	35.67
Ets1	0.807959	5.90223	8.04576	0.00456103	0.0542142	10.1733	18.3333	10.35	10.26	9.91	18.75	19.28	16.97
Mrpl41	0.807923	4.36213	4.5816	0.0323169	0.222579	7.13	12.97	6.85	6.55	7.99	10.16	8.36	20.39
Rps19bp1	0.806759	3.44802	5.31805	0.0211057	0.165845	12.85	23.29	14.1	11.45	13	16.14	21.54	32.19
Rad51	0.805942	1.8302	6.44177	0.0111468	0.106095	1.43333	2.61	1.54	1.29	1.47	2.14	3.42	2.27
Fam72a	0.80291	0.942429	5.3661	0.0205318	0.162574	0.763333	1.37333	0.78	0.72	0.79	1.22	1.04	1.86
Ada	0.802296	0.662949	4.50143	0.0338666	0.229506	0.626667	1.39333	0.41	0.53	0.94	0.8	1.3	2.08
Ccdc136	0.80148	2.6545	6.58803	0.0102667	0.100495	1.51333	2.58667	1.32	1.52	1.7	2.49	3.12	2.15
H2-M5	0.80008	1.1733	5.54277	0.0185572	0.151852	0.0333333	0.0433333	0	0.1	0	0	0.13	0
Abi3	0.798954	5.99221	5.63849	0.0175703	0.146524	10.9833	19.26	8.92	9.44	14.59	16.29	18.09	23.4
Cenpl	0.798573	3.65245	7.25398	0.00707442	0.076594	5.69	10.7567	6.18	5.77	5.12	10.08	11.48	10.71
Lrch1	0.797937	4.26428	4.97216	0.0257585	0.191248	3.24333	5.84667	4.08	3.18	2.47	6.27	8.03	3.24
Mpp7	0.797446	4.40801	7.25124	0.0070852	0.076594	4.13333	10.0167	4.24	4.25	3.91	7.22	8.58	14.25
Tspan17	0.797415	4.46131	4.00301	0.0454191	0.277089	12.7367	22.08	10.06	10.71	17.44	14.84	17.34	34.06
Ndufa8	0.796436	6.67499	5.72002	0.0167725	0.140985	142.113	246.15	146.91	129.07	150.36	206.68	191.51	340.26
S100a6	0.796251	8.03165	6.13748	0.0132346	0.11882	424.18	743.427	413.79	350.45	508.3	782.12	569.46	878.7
Pcdh12	0.79439	1.42703	4.17507	0.0410229	0.260436	0.413333	0.743333	0.42	0.32	0.5	1	0.87	0.36
Itpk1	0.793875	4.23451	5.8011	0.0160162	0.136623	5.59667	10.0933	5.58	4.73	6.48	7.51	9.85	12.92
Gpr116	0.79295	8.15196	3.95646	0.0466919	0.281171	27.4133	49.6433	26.27	30.47	25.5	60.02	68.55	20.36
Dpysl3	0.792754	5.86525	4.98545	0.0255614	0.19023	25.07	44.46	26.14	15.66	33.41	36.38	47.18	49.82
Racgap1	0.791233	3.51702	6.60551	0.0101664	0.0999192	3.22333	5.77667	3.12	2.7	3.85	4.89	6.16	6.28
Stmn1	0.790633	6.51198	5.57911	0.018176	0.149741	89.3133	157.107	89.75	78.78	99.41	125.14	129.2	216.98
Cenpw	0.790215	1.09123	5.41429	0.0199725	0.160325	1.27333	2.29	1.55	1.11	1.16	2.25	2.97	1.65
Gas7	0.79016	1.27928	4.70956	0.0299952	0.212484	0.263333	0.473333	0.3	0.29	0.2	0.58	0.28	0.56
Ctnnal1	0.789344	6.32163	5.98389	0.0144372	0.125781	19.0433	34.0867	20.29	21.24	15.6	31.55	45.67	25.04
Ripk3	0.788194	3.84793	7.21782	0.00721835	0.0773829	3.06	8.72333	3.16	3.24	2.78	7.36	8.92	9.89
Mest	0.788099	2.92385	5.98023	0.0144671	0.125956	2.42333	4.64667	3.07	1.85	2.35	4.79	5.27	3.88
Snhg3	0.78683	3.8903	6.31759	0.0119546	0.11152	43.7533	80.1167	53.74	43.6	33.92	87.72	87.3	65.33
Gm12060	0.785463	0.406273	4.94638	0.0261454	0.193101	0.426667	0.75	0.7	0.42	0.16	1.39	0.61	0.25
C230081A13Rik	0.784656	4.40134	6.79114	0.00916114	0.0925546	1.59333	2.83	1.73	1.34	1.71	2.43	3.31	2.75
Sbsn	0.784121	1.44232	4.81893	0.0281488	0.20304	1.43333	2.04	1.4	1.71	1.19	1.46	1.88	2.78
Crip1	0.781722	8.75635	5.71132	0.0168558	0.141591	1456.89	2497.78	1522.49	1267.64	1580.53	2184.18	1925.19	3383.98
Tmsb10	0.781307	6.86131	4.41696	0.0355833	0.236043	269.117	462.693	227.95	227.67	351.73	378.32	328.3	681.46
Ces2g	0.781221	5.7624	4.91884	0.0265654	0.194951	16.6833	29.59	17.74	20.03	12.28	26.56	42.75	19.46
Tsc22d1	0.780535	9.74168	4.44272	0.0350503	0.234338	463.62	810.453	501.33	417.61	471.92	552.69	617.75	1260.92
Filip1	0.780243	2.7919	4.64659	0.0311153	0.216899	1.22667	2.05	1.58	0.65	1.45	1.51	2.12	2.52
Zc3h8	0.779796	2.80904	5.29445	0.0213935	0.167276	3.85333	6.94667	4.25	4.22	3.09	6.73	9.3	4.81
2900053A13Rik	0.77903	4.65943	4.66781	0.0307331	0.215812	18.3933	31.2933	17.67	17.52	19.99	23.89	22.16	47.83
Nhp2	0.778015	5.01624	5.39847	0.0201544	0.161367	25.1567	48.5367	28.67	20.65	26.15	50.34	33.12	62.15
Pno1	0.777786	4.82679	5.73147	0.0166635	0.140441	18	30.97	20.25	15.01	18.74	27.44	24.96	40.51
Tmc4	0.777613	1.15369	4.79316	0.0285729	0.205281	0.553333	0.91	0.75	0.48	0.43	0.81	1.28	0.64
4933412E12Rik	0.775693	2.96544	5.35383	0.0206768	0.163464	4.51	7.72	4.05	4.97	4.51	5.17	8.14	9.85
Sqle	0.774914	2.81114	5.5128	0.0188778	0.153926	1.84667	3.48667	1.97	1.55	2.02	2.59	3	4.87
Pinx1	0.774895	2.35805	6.29744	0.0120913	0.112299	3.17667	5.05	3.45	2.75	3.33	4.53	5.09	5.53
Nme1	0.774849	6.09767	4.05513	0.0440374	0.272335	54.5167	93.8767	55.6	48.17	59.78	79.42	54.94	147.27
Faim	0.774239	4.73927	5.60586	0.0179005	0.1483	27.29	48.2233	27.2	25.46	29.21	44.95	35.66	64.06
Gadd45a	0.772559	3.45421	6.58116	0.0103064	0.100592	8.39667	14.8167	8.49	8.67	8.03	12.91	18.08	13.46
6230427J02Rik	0.772326	4.16972	6.21591	0.0126607	0.115386	17.74	30.7167	19.06	18.01	16.15	25.39	29.14	37.62
Cycs	0.771677	7.43982	5.09021	0.0240613	0.182828	48.15	84.89	50.51	44.93	49.01	74.76	59.37	120.54
Atp9a	0.771555	4.86055	4.253	0.0391811	0.251978	7.07333	12.3667	5.95	6.12	9.15	6.91	12.79	17.4
5430416N02Rik	0.770823	1.84508	5.8435	0.0156347	0.13382	5.64667	10.6567	5.44	5.09	6.41	13.11	8.84	10.02
St3gal6	0.769624	6.41817	7.07315	0.00782476	0.0817274	46.63	81.6067	50.53	47.04	42.32	74.84	84.1	85.88
Mrpl42	0.768906	6.53078	4.36776	0.036625	0.2411	154.93	266.74	156.55	142.81	165.43	220.39	171.7	408.13
Hdx	0.767862	0.620908	4.07756	0.0434564	0.270459	0.293333	0.473333	0.38	0.34	0.16	0.35	0.49	0.58
Ly6i	0.766752	4.02052	6.58632	0.0102766	0.100495	0.503333	0.466667	0.77	0.37	0.37	0.57	0.57	0.26
Nt5c	0.765241	4.87137	6.04638	0.0139349	0.122586	32.5233	55.9567	31.94	30.77	34.86	48.6	47.75	71.52
Gpatch4	0.764208	3.5661	6.18739	0.0128664	0.116506	6.16333	10.5067	7.54	5.06	5.89	9.51	9.93	12.08
Traf1	0.763809	4.69784	5.82723	0.0157799	0.134699	8.1	13.9667	7.66	8.33	8.31	10.07	19.2	12.63
D330023K18Rik	0.763436	2.70166	5.06723	0.0243823	0.1842	15.1467	25.21	14.35	16.09	15	24.72	15.98	34.93
Atp1b3	0.763363	8.86558	6.75857	0.00932987	0.0940341	241.637	421.26	273.48	237.52	213.91	471.51	450.34	341.93
Ccdc12	0.762765	6.11281	5.37945	0.0203753	0.162222	92.7633	156.86	94.52	84.38	99.39	136.13	119.53	214.92
Fkbp1b	0.762572	3.49779	5.99093	0.0143796	0.125383	11.9133	20.8	12.33	11.29	12.12	19.66	17.14	25.6
Thyn1	0.762415	4.08753	6.13565	0.0132483	0.118859	13.46	25.2067	14.29	13.36	12.73	23.25	19.18	33.19
Xaf1	0.760917	5.97432	6.06426	0.0137944	0.121689	19.6133	33.9233	21	21.05	16.79	31.66	28.48	41.63
Tmem199	0.759571	4.41206	5.3815	0.0203513	0.162222	14.8633	25.96	14.85	15.42	14.32	19.96	22.45	35.47
Vps36	0.759469	5.56797	5.86035	0.0154857	0.132724	32.14	56.2833	33.77	28.07	34.58	51.94	45.83	71.08
Gm10565	0.759207	0.699241	4.26414	0.038925	0.25102	0.413333	0.803333	0.51	0.43	0.3	0.91	0.8	0.7
2410004N09Rik	0.758604	0.970729	5.36392	0.0205575	0.162649	6.06	8.96667	7.62	4.52	6.04	6.99	10.62	9.29
Pfdn1	0.758062	6.01959	5.73347	0.0166445	0.140375	57.1167	98.0033	56.74	58.48	56.13	85.39	81.43	127.19
Tspan13	0.757894	7.74634	6.15939	0.0130716	0.117608	104	180.34	113.05	117.35	81.6	152.9	199.42	188.7
Bub1	0.75752	0.878513	3.87145	0.0491139	0.29162	0.34	0.613333	0.33	0.17	0.52	0.37	0.84	0.63
Sparcl1	0.75723	6.88479	4.68324	0.0304582	0.214922	33.83	59.5233	40.56	28.38	32.55	46.09	89.53	42.95
Bola2	0.756679	4.312	3.98412	0.045931	0.278848	72.8667	120.39	65.89	66.54	86.17	84.67	85.78	190.72
Tgif2	0.756213	2.61892	5.72054	0.0167676	0.140985	0.77	1.79333	0.86	0.83	0.62	1.44	1.74	2.2
Wwox	0.754742	3.37937	5.58197	0.0181463	0.149651	4.09333	7.20667	4.43	3.56	4.29	5.38	7.89	8.35
Erh	0.754721	6.67161	4.50935	0.03371	0.228871	142.787	241.587	148.71	124.17	155.48	218.61	155.88	350.27
Gm6788	0.754333	6.03609	5.83495	0.0157108	0.13429	2.23333	5.37	2.62	2.25	1.83	5.65	4.16	6.3
A930005H10Rik	0.754174	4.90639	5.60945	0.0178639	0.148191	28.91	51.4267	31.33	28.5	26.9	50.24	39.85	64.19
Prkcdbp	0.753083	8.28065	4.05082	0.04415	0.272473	302.72	516.137	295.32	247.3	365.54	331.19	438.53	778.69
Taf1d	0.752293	3.90372	6.29478	0.0121094	0.112385	8.83333	16.16	9.64	8.85	8.01	17.33	15.63	15.52
Depdc7	0.752165	1.18795	4.21444	0.0400814	0.256258	1.11667	1.88667	0.76	1.61	0.98	1.41	2.41	1.84
Flt4	0.750552	5.65307	5.08305	0.0241608	0.183223	7.39667	12.8367	6.34	7.18	8.67	13.18	8.9	16.43
Mras	0.749753	5.27878	6.19151	0.0128365	0.116402	8.53	14.6233	10.21	7.68	7.7	16.67	15.49	11.71
Fbxo5	0.749733	2.61355	5.97578	0.0145037	0.126084	2.81667	4.88667	2.38	3.1	2.97	4.23	5.62	4.81
Vgll4	0.749628	5.0365	6.80858	0.0090721	0.0919732	21.62	37.7333	21.95	21.39	21.52	34.74	41.17	37.29
5430405H02Rik	0.748812	2.99635	5.78834	0.0161328	0.137008	4.18667	7.00333	4.77	3.56	4.23	5.66	6.21	9.14
Mrrf	0.748483	4.99595	6.12733	0.0133107	0.11925	11.1933	19.85	12.05	10	11.53	15.61	21.4	22.54
Col20a1	0.74826	0.704763	4.67604	0.0305862	0.215585	0.13	0.243333	0.09	0.18	0.12	0.1	0.31	0.32
Dnm3	0.747885	3.29854	4.50634	0.0337694	0.229092	1.56333	2.77333	1.73	1.71	1.25	2.54	4.07	1.71
Me2	0.74724	4.52882	4.86544	0.0273998	0.199227	8.01333	13.54	8.17	8.05	7.82	10.54	10.84	19.24
Fam107b	0.745397	4.97874	4.85475	0.0275701	0.20012	9.27	15.9733	10.48	10.27	7.06	16.45	21.31	10.16
B3gnt8	0.744483	4.99204	4.14379	0.0417874	0.26378	17.0467	29.83	15.5	15.2	20.44	20.02	24.75	44.72
Aig1	0.743106	4.60638	4.28104	0.0385397	0.249297	15.56	27.12	17.72	14.29	14.67	18.54	21.42	41.4
Ncapg	0.742594	2.02939	5.14075	0.0233705	0.178574	0.633333	1.28	0.59	0.53	0.78	1.32	1.5	1.02
Utp14b	0.741916	2.13528	5.74151	0.0165685	0.140014	0.376667	0.843333	0.38	0.39	0.36	0.62	1.49	0.42
Slc19a1	0.741845	2.05946	4.73928	0.0294813	0.209783	1.47333	2.62	1.84	1.47	1.11	2.17	2.44	3.25
Traf5	0.741804	3.55914	5.68202	0.0171396	0.143594	4.75333	7.94	5.05	4.07	5.14	6.38	7.99	9.45
Cyp4b1	0.741255	8.55045	5.97358	0.0145218	0.126085	174.79	303.887	207.04	159.74	157.59	315.33	358.8	237.53
Psmd10	0.741191	5.10367	4.68484	0.03043	0.214843	23.0833	39.47	24.28	23.38	21.59	32.38	29.22	56.81
3110003A17Rik	0.739868	4.69668	6.17182	0.0129801	0.117033	36.6033	62.3367	36.64	34.35	38.82	62.21	55.03	69.77
Sbds	0.739539	6.9892	4.17169	0.0411047	0.260694	82.02	140.71	81.4	78.35	86.31	102.39	103.44	216.3
E230016M11Rik	0.739259	2.18879	5.47675	0.0192711	0.156179	0.243333	0.27	0.24	0.2	0.29	0.39	0.4	0.02
2810055G20Rik	0.737223	2.82367	4.3805	0.0363524	0.23968	0.776667	1.29667	0.91	1.01	0.41	1.37	1.47	1.05
Lsm7	0.736807	5.4557	3.84913	0.0497717	0.294145	118.287	198.677	122.01	106.09	126.76	161.4	118.2	316.43
Unc93b1	0.736456	5.74261	4.18758	0.0407211	0.2593	19.8467	34.6433	15.57	20.98	22.99	21.75	33.05	49.13
Spa17	0.735945	0.770143	4.87096	0.0273124	0.198705	2.46667	3.87	2.38	2.35	2.67	4.12	3.24	4.25
Rpp21	0.735676	4.6907	4.69836	0.0301913	0.213515	58.0633	96.1	57.47	55.15	61.57	74.17	77.22	136.91
Rtp4	0.734987	6.19066	6.11668	0.0133912	0.119717	46.1767	78.5733	47.76	51.04	39.73	78.47	70.57	86.68
Slc26a6	0.73497	2.23395	5.39746	0.020166	0.161367	1.14	2.02333	1.38	0.99	1.05	1.77	2.37	1.93
Ccdc124	0.733296	5.12177	4.3751	0.0364678	0.24019	41.13	67.8133	40.26	34.28	48.85	53.83	52.76	96.85
2810025M15Rik	0.732953	4.66008	6.0202	0.014143	0.123987	21.3867	36.3367	22.43	22.13	19.6	32.64	33.71	42.66
Phyhd1	0.732194	3.28931	4.71596	0.0298839	0.212051	5.96	10.76	6.11	5.61	6.16	6.94	11.11	14.23
Spsb2	0.732179	3.04754	4.98659	0.0255444	0.190216	6.32667	10.5833	6.61	6.11	6.26	7.66	10.41	13.68
Tmsb4x	0.732039	11.2983	4.49527	0.0339888	0.229842	4636.15	7749.99	4481.64	4272.97	5153.83	6449.74	5679.49	11120.8
Airn	0.730557	2.6153	5.52713	0.0187238	0.152953	5.64667	9.68	5.26	6.43	5.25	11.67	9.08	8.29
Mndal	0.730334	5.17467	4.66867	0.0307178	0.215812	11.49	18.7767	12.41	12.36	9.7	21.13	23.53	11.67
Mrpl22	0.729794	4.87659	4.75291	0.0292489	0.208659	43.63	74.5667	43.36	38.6	48.93	66.55	55.26	101.89
Tmem51	0.729609	4.75919	6.17032	0.0129911	0.117049	13.3333	22.9067	13.67	14.32	12.01	21.9	21.4	25.42
Fam181b	0.728585	2.50544	4.84083	0.0277935	0.200935	2.60667	4.56333	2.93	2.05	2.84	3.86	4.27	5.56
Il17rd	0.727841	1.93487	5.0461	0.0246814	0.185756	0.346667	0.643333	0.25	0.38	0.41	0.69	0.71	0.53
Cox6c	0.727604	7.15695	4.84216	0.0277721	0.200896	421.51	692.453	407.72	379.24	477.57	684.98	484.66	907.72
Fam132a	0.727118	3.33042	5.40964	0.0200258	0.160651	6.96333	11.4	7.75	5.18	7.96	9.58	12.2	12.42
Dhfr	0.726738	2.4267	5.0113	0.0251824	0.188185	0.826667	1.41333	0.93	0.85	0.7	1.71	0.96	1.57
Gramd1a	0.726528	5.7453	5.10608	0.0238422	0.181599	16.3633	28.06	16.72	17.69	14.68	20.13	27.9	36.15
Snhg7	0.726045	1.19238	5.05097	0.0246122	0.185566	2	4.00333	2.14	2.45	1.41	3.85	4.65	3.51
Iqck	0.724795	1.33863	5.03889	0.0247844	0.186383	0.856667	0.853333	0.85	0.78	0.94	0.66	1.37	0.53
Plat	0.723875	8.42495	5.23708	0.0221103	0.17172	126.69	214.037	135.06	144.73	100.28	215.39	168.86	257.86
Dlc1	0.723774	2.77638	4.92218	0.0265141	0.194882	0.663333	1.24333	0.78	0.53	0.68	0.89	1.15	1.69
Creb3l4	0.723069	2.48529	4.15259	0.0415708	0.262728	2.89667	5.09333	3.24	3.68	1.77	4.39	4.58	6.31
1700054N08Rik	0.722877	1.1754	4.65241	0.03101	0.216547	0.686667	1.12	0.65	0.56	0.85	0.89	1.12	1.35
2310003L22Rik	0.721617	3.06853	5.19573	0.0226425	0.174562	2.62333	4.48	2.63	2.48	2.76	4.06	3.75	5.63
Tacc3	0.721107	4.44512	5.28447	0.0215164	0.167926	4.16	6.97	4.42	4.12	3.94	6.96	8.69	5.26
2010111I01Rik	0.720612	6.82763	6.18954	0.0128507	0.116448	19.7067	35.38	21.8	20.07	17.25	32.56	39.78	33.8
Ndufc2	0.720365	6.06879	4.06131	0.0438765	0.271738	119.46	199.053	110.81	108.37	139.2	174.02	133.23	289.91
Mir3101	0.720301	0.494657	3.90389	0.0481745	0.28739	19.73	13.57	18.64	25.9	14.65	8.09	13.47	19.15
Ssna1	0.719544	6.22369	4.08002	0.0433932	0.270199	96.1567	158.97	103.51	86.69	98.27	123.13	115.73	238.05
Ano1	0.719243	3.44307	4.44804	0.0349413	0.234033	1.95667	3.32333	2.28	1.2	2.39	2.64	3.9	3.43
Intu	0.71924	1.94933	4.89932	0.0268672	0.196411	0.463333	0.77	0.57	0.48	0.34	0.79	0.84	0.68
Esco2	0.717881	0.738368	4.06545	0.043769	0.271359	0.48	0.826667	0.43	0.45	0.56	0.65	1.17	0.66
Ccdc109b	0.717711	4.42949	5.86226	0.0154689	0.13267	15.9	26.7067	16.3	17.89	13.51	25.73	25.44	28.95
Elovl6	0.716253	1.25468	4.05008	0.0441692	0.272473	0.34	0.566667	0.32	0.37	0.33	0.58	0.36	0.76
Fmo1	0.715882	7.37942	5.06861	0.0243629	0.1842	64.8533	109.81	69.86	76.91	47.79	93.94	134.15	101.34
Fkbp3	0.715085	6.06269	5.06561	0.0244051	0.184224	66.2567	114.507	68.13	59.82	70.82	100.85	89.52	153.15
Gt(ROSA)26Sor	0.713999	6.12674	5.90016	0.0151395	0.130375	60.7333	106.45	67.83	66.08	48.29	112.42	99.95	106.98
Daf2	0.711577	3.42023	5.66873	0.01727	0.14443	0.0333333	0.18	0.03	0.04	0.03	0	0.09	0.45
Cstb	0.710619	6.25005	3.94291	0.0470692	0.282393	167.663	275.49	163.62	163.12	176.25	242.19	176.71	407.57
Mphosph10	0.710177	4.29328	5.6319	0.0176365	0.146693	7.98667	13.7467	8.8	7.2	7.96	13.37	12.48	15.39
Polr2k	0.710047	6.23603	4.25248	0.039193	0.251978	226.6	373.787	224.19	214.85	240.76	337.56	255.03	528.77
2810001G20Rik	0.709737	2.52607	4.83207	0.0279352	0.201844	7.01667	11.2367	6.65	6.72	7.68	10.41	9.04	14.26
2410006H16Rik	0.709382	2.75788	5.45057	0.019562	0.158031	14.7467	24.28	14.72	13.67	15.85	27.12	22.04	23.68
Dbi	0.707248	6.42688	4.20228	0.0403697	0.257711	193.253	317.05	187.99	177.11	214.66	287.41	216.28	447.46
Ccdc68	0.70679	3.89604	5.26631	0.021742	0.169478	9.05333	14.9333	9.83	8.31	9.02	19.28	14.23	11.29
Trim41	0.70573	1.74418	4.96391	0.0258816	0.191936	0.84	1.36667	0.8	0.76	0.96	1.5	1.13	1.47
Gm9766	0.705704	3.95118	4.10754	0.0426924	0.267017	4.94667	8.25333	4.67	5.41	4.76	4.85	8.04	11.87
Smc4	0.705663	6.52382	6.08302	0.0136487	0.121095	19.36	33.0367	20.48	19.71	17.89	31.66	35.21	32.24
Rab4b	0.705356	5.45664	4.38287	0.0363018	0.239596	34.55	57.4933	33.49	34.2	35.96	40.91	50.48	81.09
Mical3	0.704416	2.36525	3.92124	0.0476797	0.285379	1.46333	2.25667	1.2	1.45	1.74	1.65	1.84	3.28
Kif20b	0.704183	2.73797	4.07296	0.0435748	0.27093	0.996667	1.77	0.89	0.96	1.14	1.37	2.63	1.31
Dhrs11	0.703001	2.8893	5.47394	0.0193021	0.156331	3.82667	6.49	4.32	3.85	3.31	7.03	6.81	5.63
Ipo11	0.702676	6.43315	5.0322	0.0248802	0.186697	17.6933	29.1833	19.91	18.48	14.69	23.88	28.35	35.32
Usp24	0.700266	4.55107	5.59686	0.0179927	0.148675	1.74333	2.96667	1.77	1.67	1.79	2.35	3.59	2.96
Rarb	0.699817	3.51546	4.66642	0.030758	0.215835	3.68667	6.15333	3.49	2.88	4.69	4.96	6.51	6.99
Odf2l	0.698191	2.57417	5.08726	0.0241022	0.18292	2.14333	3.71	1.91	2.15	2.37	3.01	3.96	4.16
1810046J19Rik	0.697903	5.44868	4.03124	0.0446651	0.274184	68.3267	111.68	68.48	63.41	73.09	97.4	77.84	159.8
Exosc8	0.69669	5.23934	5.11384	0.0237357	0.181115	24.02	42.34	26.35	23.58	22.13	38.13	32.87	56.02
Aen	0.695693	4.80495	5.0944	0.0240032	0.182606	10.3833	17.2333	10.72	9.94	10.49	14.12	16.46	21.12
S100a16	0.695404	8.54877	4.57687	0.0324063	0.222952	348.577	572.323	349.97	321.85	373.91	496.47	456.85	763.65
Tspan12	0.695375	6.87991	5.6307	0.0176485	0.146693	45.69	75.8767	49.97	47.75	39.35	68.48	77.64	81.51
Ggct	0.695118	3.0479	5.37933	0.0203767	0.162222	5.67667	9.26667	6.74	5.07	5.22	9.64	8.78	9.38
Ranbp1	0.694738	6.79389	4.02263	0.0448938	0.274983	121.483	199.39	123.02	109.51	131.92	162.82	146.13	289.22
Cib1	0.693998	5.16422	4.16697	0.0412194	0.261159	46.48	76.2733	46.49	40.91	52.04	59.85	62.08	106.89
Fbxo34	0.693563	6.3558	5.19776	0.022616	0.174562	24.8567	41.3733	26.89	26.56	21.12	40.34	51.9	31.88
Igsf10	0.692992	2.353	4.92613	0.0264535	0.194695	0.426667	0.733333	0.52	0.43	0.33	0.69	0.67	0.84
Timm10	0.692497	4.1023	4.6366	0.031297	0.21751	32.4867	53.6767	37.44	26.66	33.36	50.34	43.97	66.72
Rbms1	0.691967	7.4092	4.61134	0.0317613	0.219708	59.7667	98.6567	58.38	56.59	64.33	69.08	100.88	126.01
1600020E01Rik	0.691201	3.98292	4.89797	0.0268884	0.196411	21.2533	36.0233	23.64	23.16	16.96	30.84	36.66	40.57
Foxq1	0.690738	0.949979	4.54498	0.0330154	0.225915	0.576667	0.96	0.65	0.56	0.52	0.82	1.11	0.95
4930427A07Rik	0.690082	1.29161	4.53519	0.0332047	0.226354	0.48	1.02	0.49	0.36	0.59	1.03	1.28	0.75
Il13ra1	0.689473	6.44193	3.98834	0.0458162	0.278706	21.6933	36.69	22.83	22.88	19.37	45.66	44.24	20.17
Bloc1s2	0.689293	4.61925	4.13145	0.0420932	0.26484	27.58	45.8367	28.94	27.13	26.67	37.16	33.62	66.73
Gpr137b	0.689237	5.62817	5.24203	0.0220475	0.171437	10.61	18.2833	10.07	10.66	11.1	18.71	22.66	13.48
9430038I01Rik	0.688073	3.25127	5.30739	0.0212352	0.166597	7.63667	13.28	8.36	7.52	7.03	11.77	13.93	14.14
Xlr	0.687943	1.56466	4.33369	0.0373653	0.244196	2.65667	4.56667	3.14	2.31	2.52	5.62	3.49	4.59
Tbcb	0.685401	6.27196	3.96656	0.0464125	0.280802	69.33	112.717	72.37	61.06	74.56	100.22	78.64	159.29
Bid	0.685382	3.62086	4.45645	0.0347696	0.233377	6.17333	10.2833	6.52	6.35	5.65	7.23	10.18	13.44
Mterf	0.684235	2.51433	4.86133	0.0274652	0.199473	3.20333	5.27	2.89	3.62	3.1	4.45	6.1	5.26
Mir1982	0.680793	1.3868	4.08778	0.0431944	0.269359	19.01	22.2133	34.83	8.71	13.49	30.09	24.78	11.77
Arsj	0.679957	3.0395	5.21197	0.0224319	0.173573	2.05667	3.43	2.1	2.31	1.76	3.34	3.51	3.44
Pop7	0.679021	3.55503	4.15892	0.0414158	0.262011	16.1333	26.3433	16.56	14.1	17.74	26.73	18.59	33.71
Dynll1	0.677453	8.70808	4.63912	0.0312511	0.21751	200.67	329.853	223.13	166.93	211.95	349.99	252.34	387.23
6430548M08Rik	0.677177	3.99245	4.24927	0.0392673	0.252176	2.57	4.27667	2.46	2.51	2.74	2.86	5.62	4.35
9930012K11Rik	0.675891	2.07544	4.24313	0.0394094	0.252855	1.70667	3.06667	1.84	1.62	1.66	2.27	3.11	3.82
Lsm2	0.674588	4.54415	4.49363	0.0340213	0.229882	27.24	43.03	29.53	22.05	30.14	36.02	39.28	53.79
AW011738	0.673129	1.0469	4.13631	0.0419726	0.264228	0.626667	1.10333	0.51	0.72	0.65	1.06	1.35	0.9
Fam134b	0.672735	2.43754	4.63761	0.0312785	0.21751	1.61	2.98333	1.73	1.62	1.48	3.03	3.29	2.63
Ccdc148	0.671069	0.891288	3.94648	0.0469694	0.281928	0.316667	0.456667	0.34	0.24	0.37	0.58	0.5	0.29
Sarnp	0.670935	6.7397	3.85493	0.0495999	0.293404	97	156.083	97.93	94.9	98.17	135.71	109.73	222.81
Serpinb1a	0.669669	5.56604	5.15037	0.0232415	0.178096	24.04	39.2	28.67	23.43	20.02	41.71	37.32	38.57
Pitpnm2	0.667778	2.1123	4.41966	0.0355272	0.236043	0.506667	0.826667	0.42	0.45	0.65	0.77	1.01	0.7
Blvrb	0.667561	4.74236	4.29546	0.0382143	0.247571	34.3033	55.54	37.53	31.26	34.12	51.02	42.48	73.12
Itgb3	0.666029	4.16463	5.06687	0.0243873	0.1842	2.53	4.35333	2.29	2.68	2.62	5.03	4.23	3.8
Cdca7	0.665104	1.9637	4.64659	0.0311153	0.216899	1.54667	2.50667	1.83	1.4	1.41	2.61	2.55	2.36
Cep72	0.664901	1.30792	4.04933	0.0441889	0.272473	0.546667	0.94	0.58	0.59	0.47	0.82	1.16	0.84
Lin37	0.664406	4.11304	4.42184	0.0354819	0.235906	15.8933	26.1167	16.01	16.02	15.65	20.74	23.27	34.34
Fam60a	0.661607	3.88475	4.87673	0.0272212	0.198384	5.29	8.63	5.46	5.4	5.01	9.78	9.49	6.62
2310001H17Rik	0.659559	3.52854	4.45766	0.0347451	0.233377	15.1533	26.3133	15.3	17.88	12.28	22.5	26.13	30.31
Galm	0.657453	2.86505	4.07625	0.0434901	0.270536	2.88333	4.80667	2.62	3.31	2.72	3.41	5.17	5.84
Vegfc	0.657117	6.12496	4.36149	0.0367602	0.241488	36.86	60.1033	46.21	36.67	27.7	55.47	73.34	51.5
Etnk2	0.655192	2.24831	4.29659	0.0381889	0.247534	1.72667	2.99667	1.78	1.72	1.68	2.79	2.37	3.83
Mitd1	0.654707	4.99171	4.82368	0.0280714	0.202656	23.9267	39.3	23.85	26.52	21.41	35.88	37.06	44.96
Dnajc2	0.653528	4.03208	4.56872	0.0325609	0.223651	7.2	11.3333	6.97	6.93	7.7	9.47	11.19	13.34
Stap2	0.653071	6.22918	4.8075	0.0283361	0.203926	41.8833	68.0567	39.78	46.13	39.74	56.43	74.1	73.64
Tmem159	0.652687	5.52326	4.06532	0.0437723	0.271359	31.73	51.1267	31.56	27.17	36.46	44.65	41.71	67.02
Snrpb2	0.652489	5.23472	4.36001	0.0367921	0.241572	29.63	48.48	30.32	28.56	30.01	42.68	39.89	62.87
Dynlt1a	0.650719	6.23503	3.91107	0.047969	0.286434	1.05333	3.80667	0.73	1.04	1.39	2.18	4.39	4.85
Gm12839	0.650041	3.66328	4.25525	0.0391292	0.251823	0.376667	0.48	0.56	0.57	0	0.41	0.95	0.08
Rhbdd3	0.649672	2.84696	3.84688	0.0498385	0.294266	2.82667	4.79	2.97	2.55	2.96	3.7	3.7	6.97
Dynlt1f	0.649603	8.81191	3.8873	0.0486526	0.289758	14.32	21.58	14.21	13.57	15.18	17.87	14.88	31.99
Dynlt1e	0.649306	8.82198	3.88694	0.0486631	0.289758	16.93	26.97	17.09	15.18	18.52	22.84	18.21	39.86
Dynlt1c	0.649289	8.81068	3.88251	0.0487916	0.290124	88.3633	145.493	83.33	89.83	91.93	125.76	115.9	194.82
Frg1	0.64825	5.69537	4.33387	0.0373613	0.244196	48.8233	78.76	50.11	45.96	50.4	73.06	63.25	99.97
Rpl12	0.64811	5.42948	4.1785	0.04094	0.260171	81.8233	127.237	84.97	66.75	93.75	135.06	94.42	152.23
Mt1	0.645846	6.88441	4.15736	0.0414539	0.26212	298.947	469.073	262.6	283.13	351.11	409.23	402.36	595.63
Srxn1	0.645435	5.18757	4.44131	0.0350794	0.234338	13.88	22.3467	15.8	14.06	11.78	18.39	22.45	26.2
Prex2	0.644802	6.25498	4.10514	0.0427531	0.267133	5.87	9.55667	6.18	6.51	4.92	8.51	12.84	7.32
1600002K03Rik	0.641631	2.87847	4.43956	0.0351153	0.234454	13.66	20.6467	14.51	13.4	13.07	21.5	16.83	23.61
Tmem202	0.640205	2.15501	3.90875	0.0480353	0.286695	3.29	5.44333	2.97	3.95	2.95	4.98	4.55	6.8
Pop4	0.639592	4.741	4.77856	0.0288163	0.206677	21.71	35.51	21.51	22.14	21.48	32.13	34.02	40.38
Snrpd1	0.638606	5.07744	4.01599	0.0450706	0.275761	44.6533	71.0867	47.13	41.39	45.44	69.96	52.93	90.37
Snrpe	0.63852	5.98379	4.13827	0.0419241	0.26417	196.337	305.59	208.85	182.34	197.82	334.04	218.96	363.77
Arrdc4	0.638167	5.35897	4.32889	0.0374707	0.24438	12.2	22.1367	13.22	9.86	13.52	20.97	22.34	23.1
Slc18a2	0.638138	3.55263	4.12822	0.0421738	0.265215	2.63	4.46667	2.99	3	1.9	4.93	4.63	3.84
Elk3	0.6375	7.35681	4.94767	0.0261258	0.193092	35.1633	56.44	38.28	36.15	31.06	57.6	60.05	51.67
Fam36a	0.636395	5.19074	4.51301	0.033638	0.228691	87.2967	142.04	98.01	76.95	86.93	141.98	104.53	179.61
Fxyd5	0.635975	9.40652	4.66755	0.0307378	0.215812	688.01	1075.95	698.54	646.72	718.77	1090.04	928.78	1209.04
1810022K09Rik	0.635969	5.96751	4.48146	0.0342643	0.230719	200.617	320.067	202.04	196.93	202.88	323.94	233.7	402.56
Ece2	0.633186	3.81299	3.93412	0.0473159	0.283547	14.4333	23.0867	15.53	13.03	14.74	19.93	18.76	30.57
Mif	0.63298	5.27044	4.51806	0.0335388	0.22814	91.68	142.683	91.02	85.9	98.12	146.97	120.61	160.47
Gm9897	0.632746	2.34324	3.98007	0.0460416	0.279138	2.06333	3.06667	2.28	2.7	1.21	2.54	3.25	3.41
Nxt1	0.632511	4.14383	3.88167	0.0488161	0.290124	19.6633	31.9733	20.65	18.53	19.81	26.88	26.23	42.81
Efna1	0.631705	7.76438	4.50285	0.0338385	0.229438	152.333	241.073	155.45	153.71	147.84	204.88	233.78	284.56
Nop16	0.63142	4.99317	4.01008	0.0452289	0.276329	18.0867	29.07	20.15	16.14	17.97	26.33	23.76	37.12
Atp2b1	0.631065	6.22708	4.81205	0.0282613	0.203504	9.05667	14.45	9.62	8.45	9.1	13.82	14.29	15.24
Ppap2b	0.631014	8.44139	4.59664	0.0320346	0.221116	103.213	164.727	102.56	92.49	114.59	149.87	190.88	153.43
Fggy	0.630671	2.56408	4.43056	0.0353009	0.235321	2.69333	4.27	2.75	2.15	3.18	3.97	4.12	4.72
Cd59a	0.630419	7.14641	4.76811	0.0289917	0.2077	84.5267	133.93	86.7	87.33	79.55	119.22	144.93	137.64
Mrps18a	0.626313	5.46723	3.96218	0.0465333	0.280908	54.18	86.73	54.79	52.72	55.03	76.46	67.91	115.82
Noc4l	0.624144	4.24264	4.04767	0.0442323	0.272539	7.88667	12.52	6.98	9.05	7.63	10.42	12.08	15.06
Ppan	0.621206	4.32121	4.24856	0.0392836	0.252176	11.1733	17.14	11.06	10.34	12.12	14.38	17.06	19.98
Aprt	0.61511	5.14762	3.94056	0.0471352	0.282655	46.3067	72.0033	51.28	40.47	47.17	78.44	55.28	82.29
Ly96	0.614265	4.66062	3.96651	0.0464139	0.280802	51.9033	80.9933	54.86	48.42	52.43	77.27	64.47	101.24
Gnl3	0.612812	5.03671	4.53893	0.0331323	0.226347	16.2767	25.2067	17.74	15.09	16	25.41	26.4	23.81
Trib1	0.612061	4.38652	3.89191	0.0485191	0.289173	4.67333	7.35667	4.79	3.83	5.4	6.28	7.18	8.61
Mrpl40	0.606869	5.48286	3.8817	0.048815	0.290124	46.68	72.7267	48.11	45.62	46.31	67.2	59.53	91.45
Cyb5r3	0.606405	9.70457	4.04935	0.0441883	0.272473	384.533	599.113	383.7	382.34	387.56	475.28	627.85	694.21
1810029B16Rik	0.600311	2.74108	3.91209	0.04794	0.286396	5.80333	8.81	6.2	5.01	6.2	9.12	7.77	9.54
Cxx1c	0.599947	5.95328	4.10539	0.0427468	0.267133	62.6333	90.0067	62.61	64.02	61.27	85.73	81.06	103.23
Chn2	0.599665	4.74204	4.00824	0.0452784	0.276497	7.64333	12.4667	8.03	8.33	6.57	11.68	15.21	10.51
3200002M19Rik	0.595337	2.74256	3.91333	0.0479047	0.286396	6.53333	11.07	7.28	5.98	6.34	11.12	9.8	12.29
Pola2	0.59308	4.29145	3.99731	0.0455729	0.277493	7.13	10.8167	7.17	7.19	7.03	9.24	11.45	11.76
Arpc3	0.592955	6.7525	4.20972	0.040193	0.256842	144.953	223.09	136.53	137.3	161.03	221.52	222.47	225.28
Haus1	0.59237	3.07353	3.9534	0.0467768	0.281171	7.56667	11.44	6.96	8.17	7.57	11.97	9.99	12.36
2610015P09Rik	0.591733	3.1164	4.05322	0.0440872	0.272473	1.95333	2.94667	1.97	1.96	1.93	3.06	3.25	2.53
Mtcp1	0.589941	4.75658	3.96523	0.0464492	0.280802	25.7867	41.59	26.85	29.5	21.01	39.91	40.97	43.89
Cenpt	0.588465	6.25337	4.12315	0.0423002	0.26564	33.9767	53.0633	32.97	35.62	33.34	47.78	52.4	59.01
Pcna	0.585589	6.16362	3.86679	0.0492508	0.292021	56.1567	87.0567	62.04	57.88	48.55	80.15	78.67	102.35

## Sheet: S1pr1-ECKO.downregulated
List of 107 genes down-regulated (p-value <0.05 on EdgeR output) in S1pr1-ECKO FACS sorted MAECs. Data presented in Figure 1C.								Males	Males	Males	Males	Males	Males
Gene	logFC	logCPM	LR	PValue	FDR	Cre-.average.FPKM	Cre+.average.FPKM	Cre-.788.FPKM	Cre-.790.FPKM	Cre-.792.FPKM	Cre+.789.FPKM	Cre+.791.FPKM	Cre+.793.FPKM
S1pr1	-4.34823	7.98822	130.914	2.58611e-30	3.20936e-26	198.553	3.64333	136.83	253.69	205.14	1.83	3.17	5.93
Klk1	-2.47693	3.93375	8.75304	0.00309086	0.35332	38.71	6.68333	3.98	32.04	80.11	1.04	14.38	4.63
Klk1b5	-2.37898	1.22974	8.68462	0.00320907	0.35332	0.01	0	0	0.03	0	0	0	0
Gria1	-2.28391	-0.142762	15.8984	6.68366e-05	0.0331777	0.306667	0.0666667	0.17	0.12	0.63	0.03	0.11	0.06
F13a1	-2.28208	0.0304606	10.7344	0.00105165	0.176364	0.543333	0.1	0.29	0.44	0.9	0.21	0	0.09
Klk1b11	-2.05372	0.772705	6.45402	0.0110702	0.759009	0	0	0	0	0	0	0	0
Fam47e	-2.02415	0.499571	16.5658	4.69913e-05	0.0253549	1.47667	0.366667	1.7	2.41	0.32	0.14	0.61	0.35
Ppp1r1b	-1.99047	-0.274299	12.5302	0.000400428	0.103527	1.03333	0.276667	0.36	0.75	1.99	0.41	0.33	0.09
2310015D24Rik	-1.88487	0.488114	17.1295	3.49159e-05	0.0228056	0.703333	0.153333	0.42	0.5	1.19	0.17	0.22	0.07
Ddo	-1.85916	0.52585	7.13624	0.00755414	0.593335	0.926667	0.276667	0.22	0.62	1.94	0.06	0.52	0.25
Galnt6	-1.71102	0.663878	6.95639	0.00835202	0.632004	0.516667	0.153333	0.57	0.27	0.71	0.37	0.03	0.06
Cxcl15	-1.65679	-0.542021	4.9324	0.0263578	0.999918	0.593333	0.176667	0.17	0.11	1.5	0.11	0.22	0.2
Cacnb2	-1.64674	0.227885	14.9029	0.00011319	0.0468229	0.643333	0.193333	0.53	0.59	0.81	0.37	0.06	0.15
Gm70	-1.57106	0.171923	8.1067	0.0044102	0.427583	1.64	0.52	1.04	0.42	3.46	0.47	0.69	0.4
Rgs7	-1.57097	1.88412	7.42282	0.00644017	0.540017	2.90333	0.953333	1.17	1.4	6.14	1.34	1.17	0.35
Mybpc2	-1.52572	-0.00779888	8.97497	0.00273704	0.336303	0.473333	0.163333	0.28	0.33	0.81	0.13	0.3	0.06
Cobl	-1.50299	0.662635	12.9327	0.000322896	0.0934395	0.473333	0.166667	0.26	0.64	0.52	0.21	0.2	0.09
Khdrbs3	-1.4888	3.57464	6.90897	0.00857641	0.641164	12.4933	4.4	8.66	2.72	26.1	4.65	5.84	2.71
Stac	-1.48059	1.05149	10.295	0.00133389	0.197567	1.51333	0.516667	0.73	1.1	2.71	0.71	0.55	0.29
Myoz2	-1.47607	1.23148	12.3525	0.000440395	0.103536	3.72333	1.34	2.42	2.29	6.46	1	2.07	0.95
Efhc2	-1.47439	0.190512	8.04241	0.00456948	0.43621	0.786667	0.276667	0.33	0.47	1.56	0.45	0.16	0.22
Mark1	-1.46001	2.27219	4.18733	0.0407271	0.999918	1.94333	0.676667	1.01	0.34	4.48	0.72	1.15	0.16
Cbs	-1.44651	0.859135	10.4246	0.00124345	0.197567	1.39333	0.506667	0.63	0.92	2.63	0.5	0.65	0.37
Actc1	-1.4353	0.477057	4.7751	0.0288741	0.999918	1.91667	0.763333	0.3	1.57	3.88	1.48	0.58	0.23
Plb1	-1.41909	0.109555	8.71653	0.00315337	0.35332	2.09	0.82	1.52	1.32	3.43	1.19	1.17	0.1
Atp1a2	-1.40527	3.4443	12.3775	0.00043455	0.103536	3.09333	1.15333	2.18	2.35	4.75	1.28	1.57	0.61
9030425E11Rik	-1.40525	2.89214	6.66898	0.00981053	0.707039	4.68667	1.78	2.46	3	8.6	1.94	2.87	0.53
Pappa2	-1.40307	0.821578	5.70189	0.0169467	0.971534	0.353333	0.126667	0.33	0.5	0.23	0.09	0.02	0.27
Hapln1	-1.35694	1.70348	15.1794	9.77664e-05	0.0418373	1.13667	0.433333	0.93	1.52	0.96	0.61	0.33	0.36
Hk2	-1.3548	0.505575	10.3321	0.00130733	0.197567	0.383333	0.136667	0.31	0.54	0.3	0.1	0.25	0.06
Slamf9	-1.3342	0.539954	4.62737	0.0314658	0.999918	2.23	0.913333	0.94	1.56	4.19	0.84	1.7	0.2
Glb1l2	-1.32266	1.44492	10.9834	0.000919308	0.156282	1.26	0.526667	0.88	0.78	2.12	0.68	0.49	0.41
Fbxl13	-1.27192	0.182322	6.5427	0.0105315	0.730145	0.11	0.06	0.03	0.09	0.21	0.07	0.11	0
Abcc9	-1.26287	2.71817	7.19369	0.00731605	0.585756	1.53667	0.64	0.63	2.08	1.9	1.06	0.57	0.29
2210407C18Rik	-1.24012	0.406749	7.78757	0.0052607	0.469678	2.91	1.23333	2.06	3.34	3.33	1.48	1.79	0.43
Fbxo44	-1.22379	0.731789	11.1235	0.000852405	0.155564	1.77667	0.71	2.23	0.8	2.3	0.59	0.95	0.59
Slc15a2	-1.19844	1.49386	8.68002	0.00321718	0.35332	3.25333	1.03	3.18	2.35	4.23	1.13	1.52	0.44
Wif1	-1.19584	2.09455	5.68462	0.0171142	0.974021	3.31667	1.46333	2.37	1.99	5.59	2.47	1.44	0.48
Klk1b21	-1.19576	2.73096	5.55922	0.0183836	0.999918	12.2133	5.28667	5.14	13.97	17.53	1.8	8.41	5.65
Klk1b24	-1.19352	3.13548	4.91956	0.0265543	0.999918	15.4067	6.87333	4.97	19.49	21.76	2.84	11.17	6.61
Slc6a19	-1.18084	1.12732	8.92528	0.00281251	0.338866	1.5	0.646667	1.6	1.09	1.81	1.13	0.36	0.45
Slc25a34	-1.18041	3.65887	11.1495	0.000840523	0.155564	8.47333	3.59667	5.21	9.06	11.15	4.3	4.04	2.45
Lrrc17	-1.1783	3.98871	4.24849	0.0392852	0.999918	13.6667	5.86667	7.62	6.59	26.79	5.65	10.22	1.73
Fam84a	-1.17756	0.370464	6.65152	0.00990714	0.707039	0.666667	0.286667	0.57	0.51	0.92	0.52	0.22	0.12
Podxl2	-1.16931	1.7457	5.62683	0.0176876	0.98432	2.99667	1.28667	2.16	1.78	5.05	1.53	1.91	0.42
Tubb4	-1.1503	2.19241	5.54956	0.0184854	0.999918	3.85	1.71333	2.24	3.25	6.06	1.61	3.02	0.51
Dgkb	-1.1448	1.0201	8.3906	0.00377167	0.396665	0.513333	0.243333	0.39	0.47	0.68	0.3	0.33	0.1
Rab6b	-1.11865	2.67219	5.82902	0.0157639	0.939819	2.22333	0.993333	4.13	1.77	0.77	1.18	0.95	0.85
Fam46b	-1.11716	1.83769	8.40694	0.00373792	0.396475	2.84667	1.29667	2.66	2.55	3.33	1.32	1.99	0.58
Asb5	-1.11482	0.329534	4.80605	0.02836	0.999918	1.34	0.52	0.59	0.89	2.54	0.55	0.78	0.23
Ngef	-1.09314	1.14473	6.12665	0.0133159	0.865186	1.40667	0.643333	0.85	1.06	2.31	0.73	0.93	0.27
Fibin	-1.08178	3.94603	5.8395	0.0156702	0.939457	13.0267	6.04	6.77	9.75	22.56	7.02	8.13	2.97
Fap	-1.08122	0.438964	5.28845	0.0214674	0.999918	0.86	0.396667	0.88	0.32	1.38	0.68	0.19	0.32
Lrrc9	-1.07677	-0.0834252	5.06079	0.0244731	0.999918	0.453333	0.166667	0.28	0.29	0.79	0.19	0.05	0.26
Cidea	-1.0761	0.534274	5.05377	0.0245724	0.999918	2.57667	1.19333	2.51	1.02	4.2	1.83	1.16	0.59
Dtna	-1.06859	3.49675	5.19189	0.0226926	0.999918	4.41	1.97	2.85	3.34	7.04	2.6	2.56	0.75
Gldn	-1.0493	1.39289	8.80661	0.00300141	0.35332	0.93	0.456667	0.71	1.04	1.04	0.39	0.68	0.3
Foxq1	-1.01508	0.607522	5.28046	0.0215661	0.999918	0.923333	0.43	0.55	1.23	0.99	0.58	0.14	0.57
Adssl1	-1.00956	0.961705	3.96939	0.0463346	0.999918	1.98667	0.99	0.8	1.12	4.04	1.09	1.39	0.49
Dsp	-1.00664	2.09981	6.61243	0.010127	0.710032	0.726667	0.356667	0.75	0.6	0.83	0.57	0.34	0.16
Mrvi1	-0.999128	3.37942	7.54784	0.00600822	0.510472	2.88333	1.44	1.7	3.98	2.97	1.7	1.66	0.96
Epha7	-0.997144	0.541365	3.9195	0.047729	0.999918	0.406667	0.216667	0.14	0.42	0.66	0.25	0.19	0.21
Pln	-0.996474	1.1395	8.27444	0.00402071	0.408992	1.55667	0.736667	1.09	1.58	2	0.75	0.62	0.84
Myom1	-0.99372	3.32648	6.57918	0.0103178	0.71935	2.55667	1.29667	1.73	2.66	3.28	1.7	1.58	0.61
Cdh3	-0.985092	0.859161	5.90978	0.0150571	0.925042	0.86	0.406667	1.23	0.54	0.81	0.61	0.41	0.2
Xk	-0.984272	2.71397	7.88631	0.00498105	0.452863	2.12	1.07667	1.34	2.02	3	1.29	1.22	0.72
Galntl1	-0.972465	3.63633	4.64312	0.0311782	0.999918	5.36333	2.69667	3.64	3.8	8.65	3.46	3.61	1.02
Znrf2	-0.970601	2.70721	4.30881	0.0379154	0.999918	4.12667	2.03667	3.96	1.25	7.17	2.22	2.54	1.35
Atp1b2	-0.963851	2.83776	4.63683	0.0312927	0.999918	3.99	1.98333	2.14	3.24	6.59	1.5	3.44	1.01
Nfix	-0.959238	5.51392	5.36032	0.0206	0.999918	25.8967	12.2333	20.39	10.77	46.53	11.09	15.83	9.78
Trpv2	-0.95142	2.00808	4.21852	0.039985	0.999918	2.37667	1.22	1.33	1.41	4.39	1.24	1.76	0.66
Lancl3	-0.945518	2.60439	6.63149	0.0100191	0.707039	2.56333	1.27667	1.73	2.18	3.78	1.62	1.42	0.79
Cdkn1c	-0.9367	6.16227	4.51722	0.0335553	0.999918	63.7633	32.1233	40.35	27.94	123	28.89	32.12	35.36
D7Ertd715e	-0.93292	0.456628	5.28593	0.0214984	0.999918	1.09667	0.58	1.38	1.21	0.7	0.97	0.43	0.34
Actg2	-0.914478	4.51489	4.49257	0.0340426	0.999918	32.3833	17.1033	35.82	29.49	31.84	12.59	31.45	7.27
Tmem82	-0.892467	1.81867	4.27223	0.0387402	0.999918	2.32667	1.20333	1.28	2.09	3.61	1.07	1.92	0.62
Enpep	-0.891306	1.95646	5.79613	0.0160615	0.949157	1.50667	0.803333	0.91	1.34	2.27	1.03	0.74	0.64
Itih4	-0.89014	5.34449	4.57343	0.0324716	0.999918	21.4633	11.4667	13.29	16.83	34.27	9.39	18.33	6.68
Dusp26	-0.873552	1.08164	6.24589	0.0124482	0.827484	2.04	1.06667	1.62	1.84	2.66	1.13	1.38	0.69
B230206H07Rik	-0.865776	2.75354	4.77822	0.0288218	0.999918	0.0133333	0.00666667	0.01	0.02	0.01	0	0.02	0
Itga7	-0.86281	4.75019	4.30825	0.0379279	0.999918	10.0833	5.38667	5.84	9.21	15.2	6.52	7.08	2.56
Ndrg2	-0.859653	6.0994	4.35131	0.0369804	0.999918	55.27	30.1133	34.01	39.7	92.1	27.1	45	18.24
Nudt10	-0.845553	0.400235	4.77997	0.0287927	0.999918	1.22333	0.7	1.73	0.93	1.01	1.09	0.41	0.6
Lmod1	-0.845088	4.17769	3.8586	0.0494916	0.999918	6.97667	3.94667	6.46	5.63	8.84	3.86	6.6	1.38
Cspg4	-0.840707	3.85821	4.21756	0.0400077	0.999918	2.77667	1.56667	1.9	3.94	2.49	2.23	1.76	0.71
Fam81a	-0.826181	1.49184	4.99213	0.0254628	0.999918	1.46333	0.856667	1.27	1.36	1.76	0.9	1.23	0.44
Hist1h4d	-0.819411	1.12617	4.73162	0.029613	0.999918	11.5833	8.33	13	17.05	4.7	8.03	6.57	10.39
Fhl2	-0.816572	0.798812	5.49601	0.01906	0.999918	1.97333	1.04667	2.11	1.36	2.45	0.85	1.42	0.87
Klhl11	-0.805401	0.472593	4.18088	0.0408824	0.999918	0.903333	0.526667	0.69	0.79	1.23	0.68	0.25	0.65
Eps8l2	-0.796575	4.73378	4.4262	0.0353912	0.999918	13.5667	7.66	7.24	18.92	14.54	5.35	8.84	8.79
Enah	-0.795759	1.51974	5.122	0.0236244	0.999918	0.906667	0.55	0.91	1.1	0.71	0.7	0.65	0.3
Dusp14	-0.788068	1.33434	4.20251	0.0403642	0.999918	3.13333	1.72667	2.45	1.84	5.11	2.05	2.01	1.12
Setd4	-0.778916	0.596349	4.22249	0.0398915	0.999918	0.883333	0.413333	0.79	0.54	1.32	0.23	0.71	0.3
Bcan	-0.774247	4.18172	5.99052	0.0143829	0.901475	9.09333	5.21667	11.45	6.32	9.51	4.42	6.15	5.08
Dcdc2a	-0.769098	2.28394	3.85972	0.0494586	0.999918	1.07667	0.606667	0.66	1.75	0.82	0.78	0.53	0.51
4833442J19Rik	-0.763858	4.51798	5.55635	0.0184138	0.999918	26.1167	15.0533	26.56	19.47	32.32	15.22	19.63	10.31
Pde5a	-0.740433	2.26364	4.04185	0.0443852	0.999918	1.00333	0.566667	0.82	0.61	1.58	0.68	0.61	0.41
Gm15910	-0.727378	0.436012	4.63488	0.0313284	0.999918	0.426667	0.26	0.49	0.4	0.39	0.17	0.22	0.39
Olfr1033	-0.721954	3.64056	4.61818	0.0316349	0.999918	0.383333	0.22	0.22	0.36	0.57	0.45	0.11	0.1
Bves	-0.708801	1.47401	4.0589	0.0439391	0.999918	2.84	1.74333	2.89	1.72	3.91	1.77	2.13	1.33
Gstm7	-0.693093	2.44061	3.88972	0.0485826	0.999918	7.12667	4.24333	5.54	4.87	10.97	3.94	5.23	3.56
Nudt11	-0.684571	0.990548	4.39764	0.0359888	0.999918	1.12333	0.723333	1.17	1.15	1.05	0.99	0.5	0.68
Mtap7d3	-0.675417	2.53473	4.57702	0.0324036	0.999918	2.97667	1.91	2.35	2.35	4.23	1.74	2.16	1.83
Ank1	-0.663998	0.643443	4.05973	0.0439174	0.999918	0.11	0.0766667	0.09	0.12	0.12	0.06	0.09	0.08
2610018G03Rik	-0.656421	1.30943	3.87454	0.0490238	0.999918	1.49	1.00333	1.39	1.83	1.25	1.08	0.67	1.26
Tbx2	-0.647585	0.873293	3.89119	0.0485401	0.999918	0.766667	0.48	0.74	0.73	0.83	0.38	0.68	0.38
Gng7	-0.642652	1.45549	4.19449	0.0405556	0.999918	1.11667	0.653333	0.85	1.18	1.32	0.54	0.55	0.87

## Sheet: S1pr1-ECKO.upregulated
List of 258 genes up-regulated (p-value <0.05 on EdgeR output) in S1pr1-ECKO FACS sorted MAECs. Data presented in Figure 1C.								Males	Males	Males	Males	Males	Males
Gene	logFC	logCPM	LR	PValue	FDR	Cre-.average.FPKM	Cre+.average.FPKM	Cre-.788.FPKM	Cre-.790.FPKM	Cre-.792.FPKM	Cre+.789.FPKM	Cre+.791.FPKM	Cre+.793.FPKM
Ifi202b	8.46158	0.0464017	19.2807	1.1284e-05	0.00933565	0	1.47	0	0	0	0	4.41	0
Prnd	3.4446	2.88048	27.4831	1.58472e-07	0.000327773	0.73	6.81667	0.17	0.5	1.52	4.11	11.81	4.53
Clca5	3.41774	-0.167242	42.8478	5.91689e-11	3.67143e-07	0.0433333	0.51	0.03	0.1	0	0.52	0.69	0.32
Nos2	3.19588	0.461203	22.1678	2.49827e-06	0.0028185	0.0666667	0.686667	0	0.04	0.16	0.36	1.38	0.32
Cd2	3.15408	-0.925533	12.3795	0.000434074	0.103536	0.0966667	0.986667	0.13	0.08	0.08	0	2.49	0.47
Ccl2	2.90405	1.93709	40.1997	2.29286e-10	9.48478e-07	1.77667	13.9467	2.91	1.46	0.96	9.52	21.24	11.08
Ccl5	2.83944	1.75192	12.18	0.000483049	0.109406	3.09	20.6467	4.53	0.14	4.6	5.75	32.84	23.35
Cxcl9	2.61195	2.40075	12.671	0.000371372	0.0980581	0.673333	3.94667	1.13	0.19	0.7	1.16	9.45	1.23
Nlrc3	2.51152	-0.532143	21.2862	3.95571e-06	0.00409086	0.0166667	0.106667	0.02	0.02	0.01	0.1	0.12	0.1
Ubd	2.431	3.01326	5.3086	0.0212204	0.999918	4.64667	24.34	4.09	0.11	9.74	2.54	63.04	7.44
Slc16a12	2.40251	1.04417	15.783	7.10362e-05	0.0339061	0.19	1.08	0.31	0.26	0	0.84	1.65	0.75
Klrb1f	2.36156	0.982821	24.4024	7.81712e-07	0.00138586	0.5	2.14	0.18	0.47	0.85	1.79	2.89	1.74
C1qtnf3	2.29109	0.31532	7.63235	0.00573306	0.4937	0.206667	0.99	0.54	0.08	0	1.62	0.63	0.72
Ccl7	2.12541	0.692995	12.0155	0.000527591	0.114867	1.31333	5.35333	0.13	0.48	3.33	5.01	5.53	5.52
Ptx3	2.10503	0.7313	22.9933	1.62566e-06	0.0022416	0.34	1.78	0.09	0.47	0.46	1.82	2.17	1.35
Cd74	2.10333	8.77333	7.65795	0.00565227	0.4937	189.64	788.633	298.7	15.59	254.63	197.28	1353.57	815.05
Mir5107	2.09041	6.31959	7.62125	0.00576845	0.4937	2.91	0	8.73	0	0	0	0	0
Aplnr	2.03778	3.92277	12.1729	0.000484878	0.109406	2.10333	8.71667	0.55	2.3	3.46	5.38	16.63	4.14
Kit	1.9867	1.27713	23.5206	1.23584e-06	0.00191709	0.24	0.936667	0.14	0.22	0.36	0.78	1.42	0.61
AW551984	1.96701	1.42581	16.773	4.21294e-05	0.0248964	0.306667	1.26	0.53	0.26	0.13	1.73	1.41	0.64
Plac8	1.9242	1.85863	7.90643	0.00492595	0.452822	3.75	14.5233	3.66	5.52	2.07	4.52	35.4	3.65
Adamts4	1.90807	2.65993	21.0211	4.54244e-06	0.00433628	0.59	2.94667	0.43	1.08	0.26	2.71	4.35	1.78
Prox1	1.90362	2.77797	33.9472	5.66284e-09	1.75689e-05	0.773333	3.00333	0.73	0.75	0.84	3.15	3.92	1.94
Zbp1	1.89706	3.0449	11.2797	0.000783589	0.149605	5.34333	19.2367	5.89	3.13	7.01	6.09	41.72	9.9
Spp1	1.89029	5.1937	9.36374	0.0022132	0.289114	15.7267	58.35	7.16	28.7	11.32	26.65	125.11	23.29
Hmga2-ps1	1.88701	-0.520704	8.16386	0.00427332	0.420888	0.22	0.933333	0.25	0.25	0.16	0.25	2.32	0.23
Nts	1.8404	4.97924	30.2461	3.80559e-08	9.44547e-05	15.8333	57.7633	17.88	14.35	15.27	37.31	70.61	65.37
H2-Eb1	1.83001	5.53301	7.07162	0.00783142	0.598179	17.0833	59.77	29.21	2.3	19.74	18.9	108	52.41
Fam65c	1.82733	-0.742977	9.78949	0.00175512	0.247512	0.0866667	0.323333	0.13	0.03	0.1	0.1	0.72	0.15
Darc	1.82674	3.31661	4.99224	0.0254613	0.999918	5.54	19.7167	1.89	8.05	6.68	3.27	52.39	3.49
Il4i1	1.8249	1.98097	14.0055	0.000182272	0.0696025	0.526667	3.21	0.42	0.8	0.36	1.94	6.41	1.28
Fam167b	1.8232	1.01267	8.59314	0.00337432	0.367328	1.44	5.18	1.08	1.97	1.27	2.91	11.71	0.92
AI848285	1.82066	0.852018	22.3444	2.27875e-06	0.0028185	0.376667	1.76	0.36	0.62	0.15	1.28	2.75	1.25
Scn3a	1.81555	0.722631	10.9892	0.000916458	0.156282	0.08	0.276667	0.01	0.12	0.11	0.23	0.19	0.41
Cxcl10	1.79758	4.43025	6.8765	0.00873367	0.645148	13.68	47.7433	25.06	3.13	12.85	11.38	101.95	29.9
Fam190a	1.78201	-0.384117	13.2454	0.000273252	0.0892383	0.07	0.226667	0.05	0.06	0.1	0.13	0.46	0.09
Prg2	1.77027	-0.162379	5.18906	0.0227295	0.999918	0.756667	2.59667	0.64	0.93	0.7	0.42	7.19	0.18
Gm12250	1.76916	4.45398	7.09257	0.00774042	0.598179	4.81	16.15	6	0.75	7.68	5.26	30.33	12.86
Nppc	1.74382	1.80738	8.93241	0.00280155	0.338866	2.10333	7.53333	1.19	3.12	2	15.95	4.84	1.81
Sh3gl3	1.72283	1.55502	9.47518	0.00208271	0.283039	1.16	3.72	0.45	1.14	1.89	1.61	7.25	2.3
H2-Aa	1.71884	6.84174	6.10197	0.0135031	0.868259	73.42	239.433	116.35	9.78	94.13	67.39	437.18	213.73
Kcnk5	1.71295	1.24194	10.5573	0.00115731	0.186523	0.403333	1.34667	0.18	0.7	0.33	1.15	2.41	0.48
Adamtsl1	1.70288	2.71573	15.2582	9.37692e-05	0.0418373	0.403333	1.35667	0.46	0.54	0.21	0.92	2.32	0.83
Sh3tc2	1.68893	0.909158	17.0171	3.70451e-05	0.0229865	0.233333	0.753333	0.27	0.28	0.15	0.46	1.28	0.52
Anxa8	1.64528	-0.152099	4.36218	0.0367453	0.999918	0.303333	0.963333	0.56	0.35	0	0.3	1.87	0.72
Serpina3g	1.64484	3.94214	12.4078	0.000427553	0.103536	4.26667	13.7233	5.88	1.92	5	6.44	22.35	12.38
Ephb1	1.62778	0.0114472	16.351	5.2629e-05	0.0272136	0.116667	0.38	0.09	0.09	0.17	0.37	0.19	0.58
Cyp1a1	1.62065	1.71244	7.17244	0.00740321	0.588935	0.8	2.42667	1.04	0.65	0.71	3.01	4.01	0.26
Ccl21b	1.61433	9.2194	12.8459	0.000338217	0.0934395	0	0	0	0	0	0	0	0
Ccl21c	1.61419	9.21959	12.8426	0.000338822	0.0934395	24.52	77.2733	17.01	32.81	23.74	52.41	133.1	46.31
Gm10591	1.61419	9.21959	12.8426	0.000338822	0.0934395	24.52	77.2733	17.01	32.81	23.74	52.41	133.1	46.31
Gm13304	1.61419	9.21959	12.8426	0.000338822	0.0934395	24.52	77.2733	17.01	32.81	23.74	52.41	133.1	46.31
Ccl21a	1.60005	8.85908	11.0632	0.000880577	0.156114	0.643333	1.86333	0.03	0.01	1.89	0	0.24	5.35
Gm1987	1.60005	8.85908	11.0632	0.000880577	0.156114	187.897	564.967	117.23	251.28	195.18	246.74	1083.31	364.85
Fscn1	1.57996	2.93618	13.8267	0.00020047	0.0696025	1.85	5.32667	1.06	1.67	2.82	3.33	8.63	4.02
Pcsk6	1.56889	3.12634	12.345	0.000442175	0.103536	1.28333	3.70667	1.23	0.5	2.12	2.92	5.45	2.75
Nptx1	1.54697	2.17048	9.43202	0.0021323	0.283039	0.53	1.55667	0.38	1.02	0.19	2	0.89	1.78
H2-Ab1	1.5238	7.19127	4.9999	0.0253488	0.999918	92.9933	263.827	149.62	11.42	117.94	90.17	471.48	229.83
Ednrb	1.51436	5.3335	19.61	9.49709e-06	0.00841849	6.54333	18.5367	6.18	6.84	6.61	12.66	27.82	15.13
Dtx1	1.50936	3.27104	13.8818	0.000194673	0.0696025	1.65333	4.63	0.79	1.96	2.21	3.68	6.74	3.47
Ralgps2	1.47532	0.96783	13.8132	0.000201909	0.0696025	0.163333	0.476667	0.27	0.1	0.12	0.38	0.61	0.44
Rgs2	1.4713	4.60116	15.1808	9.76916e-05	0.0418373	5.03333	13.8467	6.16	5.14	3.8	9.13	22.39	10.02
Stc1	1.47008	4.8891	10.2838	0.00134206	0.197567	5.27667	14.5067	5.7	6.73	3.4	5.44	23.99	14.09
Marcksl1	1.46784	4.5373	18.0017	2.20703e-05	0.0161113	10.8933	29.4733	11.78	10.23	10.67	19.75	44.21	24.46
Pla2g4c	1.46289	0.696917	5.87191	0.0153844	0.935883	0.3	0.813333	0.49	0.39	0.02	0.63	0.74	1.07
Rsad2	1.44186	2.97751	8.74547	0.00310371	0.35332	1.38667	3.73333	0.74	1.28	2.14	1.85	6.92	2.43
AI607873	1.43794	-0.0105839	6.71713	0.0095491	0.693008	0.106667	0.31	0.04	0.09	0.19	0.26	0.45	0.22
Meox1	1.42929	3.38416	16.6253	4.5539e-05	0.0253549	3.42	9.13	3.04	3.41	3.81	7.16	13.97	6.26
Ifi27l2a	1.41803	5.29774	6.91441	0.00855037	0.641164	109.747	291.55	54.56	173.64	101.04	160.52	559.46	154.67
Rasgrp3	1.40893	3.30682	11.7479	0.000609107	0.125984	1.40333	3.69333	0.72	1.71	1.78	2.47	5.64	2.97
Egr4	1.39762	0.177049	11.5062	0.000693659	0.138844	0.33	0.96	0.31	0.46	0.22	0.85	1.57	0.46
Irf8	1.39256	2.53477	11.2903	0.000779133	0.149605	1.40667	3.69333	1.25	1.23	1.74	1.93	6.41	2.74
Nup62-il4i1	1.39022	2.32419	11.0362	0.000893519	0.156177	0.176667	0.126667	0.27	0.15	0.11	0	0.21	0.17
Tmem108	1.38731	1.33039	5.93803	0.0148176	0.914856	0.44	1.12	0.44	0.68	0.2	0.59	2.27	0.5
Cyfip2	1.38605	0.0843421	8.2896	0.00398727	0.408943	0.106667	0.27	0.09	0.14	0.09	0.34	0.08	0.39
Glt25d2	1.37213	0.517778	10.0069	0.00155954	0.222458	0.2	0.623333	0.28	0.28	0.04	0.53	1	0.34
Irf5	1.36612	0.30711	10.288	0.001339	0.197567	0.4	1.07667	0.17	0.62	0.41	0.68	1.82	0.73
St8sia6	1.36255	3.2687	18.8679	1.4009e-05	0.0108657	2.13667	5.41333	1.85	2.65	1.91	4.88	4.88	6.48
D030025P21Rik	1.3585	1.42184	17.4642	2.92762e-05	0.0201843	0.0733333	0.27	0.06	0.07	0.09	0.17	0.54	0.1
Wnt9b	1.35686	3.00238	6.39146	0.0114671	0.77763	1.22	3.14667	0.98	2.36	0.32	4.5	2.87	2.07
Hdc	1.35506	3.47428	8.17434	0.00424871	0.420888	3.23333	8.33333	3.89	2.84	2.97	3.08	16.16	5.76
Nid2	1.34836	3.84248	11.7946	0.000594019	0.124945	1.88667	4.93667	2.61	2.22	0.83	4.69	4.39	5.73
Pdpn	1.34422	1.79789	12.7396	0.000357994	0.0965804	1.38333	3.40333	1.03	1.73	1.39	2.23	5.51	2.47
H2-DMa	1.33838	4.3478	4.90646	0.0267564	0.999918	14.0933	36.67	22.86	3.3	16.12	12.05	61.05	36.91
Adora2a	1.32765	0.216877	10.2685	0.0013532	0.197567	0.33	0.816667	0.24	0.33	0.42	0.42	1.29	0.74
Htr2b	1.30693	4.17146	5.82191	0.0158277	0.939819	6.26333	15.48	6.3	7.2	5.29	6.31	34.33	5.8
Scn5a	1.29975	0.199432	4.6921	0.0303016	0.999918	0.0833333	0.2	0.01	0.15	0.09	0.13	0.31	0.16
Slc2a6	1.29592	0.157931	9.25954	0.00234272	0.299723	0.4	0.963333	0.61	0.36	0.23	0.69	1.58	0.62
Otogl	1.29277	2.52511	3.95156	0.0468279	0.999918	0.48	1.17333	0.57	0.67	0.2	2.23	0.13	1.16
Tnfaip8l1	1.28496	4.01665	11.7036	0.00062378	0.126904	5.29667	12.8667	4.96	5.8	5.13	8.39	21.45	8.76
Ccbp2	1.28332	2.73299	13.3894	0.000253056	0.0848763	1.72333	4.14667	1.27	2.28	1.62	2.82	5.42	4.2
Egln3	1.27564	1.66918	7.09609	0.00772521	0.598179	0.86	2.09333	0.94	0.43	1.21	0.94	3.86	1.48
Ptn	1.27344	3.98858	13.1191	0.000292301	0.0930116	2.92667	6.96333	3.07	3.24	2.47	5.92	10.87	4.1
Ces2d-ps	1.27181	0.965359	11.1958	0.000819821	0.154151	0	0.03	0	0	0	0	0	0.09
Nrp2	1.27082	3.22927	7.06582	0.00785683	0.598179	1.15333	3.03333	0.6	2.24	0.62	2.18	4.46	2.46
Tubb3	1.27064	1.8508	14.6677	0.000128228	0.0513325	1.6	3.88667	1.35	1.86	1.59	2.66	4.23	4.77
Upp1	1.26925	4.06296	8.7409	0.00311151	0.35332	11.2167	26.6367	8.97	14.9	9.78	14.57	47.47	17.87
Ralgps1	1.26459	0.101219	8.31909	0.00392307	0.40571	0.196667	0.506667	0.11	0.29	0.19	0.39	0.77	0.36
Ltbp2	1.26021	5.148	13.9068	0.0001921	0.0696025	3.57333	8.48667	3.28	3.31	4.13	11.06	5.37	9.03
2810408A11Rik	1.25171	0.301201	7.06635	0.00785452	0.598179	0.483333	1.26	0.43	0.79	0.23	0.75	2.09	0.94
Ston2	1.24436	0.921979	9.70817	0.00183451	0.255801	0.123333	0.283333	0.09	0.19	0.09	0.28	0.42	0.15
Hhip	1.24418	1.12315	5.52265	0.0187718	0.999918	0.17	0.393333	0.22	0.22	0.07	0.75	0.28	0.15
Duoxa2	1.24357	1.3626	6.00283	0.014283	0.899754	1.34333	2.94	0.97	0.68	2.38	2.18	5.43	1.21
Glis3	1.23256	-0.000263128	5.64796	0.0174757	0.97691	0.133333	0.346667	0.21	0.15	0.04	0.64	0.19	0.21
Ms4a4d	1.22347	-0.0434704	3.87603	0.0489801	0.999918	0.54	1.21	0.76	0.8	0.06	1.42	1.75	0.46
4930578C19Rik	1.2141	0.558038	7.7496	0.00537243	0.47285	0.486667	1.15667	0.31	0.59	0.56	0.47	1.94	1.06
Flrt3	1.21112	2.44059	8.08771	0.00445665	0.428737	1.03333	2.37	1.27	0.47	1.36	2.2	3.59	1.32
Igfbp6	1.20821	2.85026	4.30407	0.0380212	0.999918	5.09	11.62	6.02	5.8	3.45	6.74	25.37	2.75
Slc38a4	1.20302	1.3382	13.0211	0.000307999	0.0934395	0.496667	1.12667	0.57	0.55	0.37	1.19	1.39	0.8
Eda2r	1.19818	2.17794	12.0618	0.000514662	0.114053	1.12667	2.41667	1.38	0.85	1.15	2.57	1.48	3.2
Neurl3	1.17771	4.26907	9.42207	0.00214389	0.283039	5.51333	12.64	6.75	5.15	4.64	10.81	20.46	6.65
Fst	1.17365	0.45953	7.76089	0.00533896	0.47285	0.386667	0.966667	0.18	0.56	0.42	0.53	1.47	0.9
Ank3	1.17234	0.812377	7.91009	0.00491597	0.452822	0.176667	0.38	0.1	0.29	0.14	0.33	0.51	0.3
Reln	1.17194	2.96103	7.9874	0.00471039	0.446228	0.456667	1.08333	0.21	0.78	0.38	0.84	1.43	0.98
Ch25h	1.15998	3.9138	10.6624	0.00109337	0.180916	9.91	22.1233	13.48	8.15	8.1	19.98	31.3	15.09
C3	1.15776	3.05919	6.41688	0.0113041	0.770789	1.24667	2.71667	0.75	2.39	0.6	3.23	2.92	2
Hecw2	1.13145	0.0447204	7.87967	0.00499937	0.452863	0.0666667	0.143333	0.08	0.09	0.03	0.07	0.22	0.14
Pard6g	1.131	4.02768	10.3767	0.00127617	0.197567	4.26	9.20667	3.42	3.91	5.45	7.39	13.79	6.44
Mmrn1	1.1282	6.97547	11.4467	0.000716222	0.141084	21.99	47.36	13.44	23.83	28.7	48.51	54.27	39.3
C4b	1.12673	3.58326	9.3328	0.00225088	0.290973	1.57333	3.42333	1.44	2.32	0.96	2.86	4.5	2.91
Ces2c	1.12427	1.5854	8.33602	0.00388666	0.405324	0.743333	1.62667	0.66	0.95	0.62	0.69	2.2	1.99
Myo1b	1.11915	2.45453	11.9109	0.000558068	0.119407	0.576667	1.58	0.36	0.86	0.51	1.2	2.01	1.53
Hic1	1.1134	2.21914	8.7084	0.00316748	0.35332	1.06333	2.37	1.2	1.02	0.97	1.3	3.91	1.9
Gpr97	1.11238	3.81192	9.1133	0.00253758	0.32134	4.59	9.70667	3.47	4.12	6.18	5.93	14.66	8.53
Apold1	1.09953	5.22059	7.40007	0.00652212	0.543218	9.00667	19.3767	9.77	11.69	5.56	10.52	30.08	17.53
Pcdh12	1.096	1.46966	9.01556	0.00267691	0.334391	0.393333	0.83	0.21	0.54	0.43	0.81	0.78	0.9
Apba2	1.0945	0.657355	8.2019	0.00418466	0.418803	0.346667	0.74	0.23	0.52	0.29	0.72	0.96	0.54
Fam102a	1.08852	0.725568	8.54359	0.00346741	0.374178	0.29	0.63	0.36	0.37	0.14	0.55	0.65	0.69
Fam167a	1.08389	0.433926	7.63777	0.00571586	0.4937	0.253333	0.52	0.26	0.37	0.13	0.7	0.33	0.53
Prkcq	1.07972	1.87937	9.45807	0.00210223	0.283039	0.883333	1.84	0.84	1.22	0.59	1.57	2.46	1.49
C4a	1.06349	1.03078	6.8298	0.00896494	0.658313	0.0166667	0.0233333	0.04	0.01	0	0.02	0.04	0.01
Plxnc1	1.05658	0.585258	5.22397	0.0222777	0.999918	0.143333	0.31	0.22	0.11	0.1	0.41	0.11	0.41
Cxcl2	1.05237	3.03147	4.34279	0.0371659	0.999918	5.88333	11.1633	8.49	7.55	1.61	10.82	6.61	16.06
Enpp2	1.04698	4.43836	9.52005	0.00203239	0.280244	5.52333	11.3067	4.46	4.07	8.04	13.27	12.01	8.64
Kbtbd11	1.03339	0.948007	5.36622	0.0205304	0.999918	0.213333	0.406667	0.12	0.36	0.16	0.24	0.64	0.34
Nuak2	1.0282	1.30136	10.3292	0.00130945	0.197567	0.63	1.34	0.73	0.68	0.48	1.19	1.74	1.09
Ttyh1	1.02603	1.92809	6.02328	0.0141184	0.893923	0.696667	1.51	0.4	0.69	1	0.92	2.61	1
Gmfg	1.0205	0.734223	5.7252	0.0167232	0.971534	1.62667	3.01	1.12	1.45	2.31	1.23	5.17	2.63
Pyroxd2	1.01629	0.264149	6.23301	0.012539	0.827484	0.256667	0.613333	0.46	0.17	0.14	0.48	0.55	0.81
Trp53i11	1.01275	5.54465	5.28729	0.0214816	0.999918	14.4467	28.9267	8.12	16.56	18.66	14.59	50.83	21.36
Lbp	1.01217	5.14881	5.77766	0.0162311	0.954636	12.1167	24.53	10.57	18.87	6.91	19.1	38.92	15.57
Il33	1.01051	4.99187	6.2353	0.0125228	0.827484	10.9967	22.1533	8.46	14.97	9.56	14.03	37.57	14.86
Esr1	1.01037	4.58674	10.0538	0.00152037	0.219393	4.25667	7.30333	3.78	5.69	3.3	7.31	5.88	8.72
Gdf10	0.981436	3.42394	4.72987	0.0296431	0.999918	3.78667	7.50667	5.23	4.07	2.06	11.47	7.99	3.06
Hlf	0.977958	2.06466	5.48056	0.0192291	0.999918	0.6	1.17333	0.87	0.32	0.61	1.15	0.66	1.71
Tec	0.953423	2.46971	5.31034	0.0211992	0.999918	1.81667	3.52333	1.92	1.82	1.71	2.73	6.26	1.58
F2rl3	0.950263	1.33337	5.19515	0.02265	0.999918	1.34	2.47333	1.1	1.26	1.66	1.56	4.45	1.41
Cx3cl1	0.945325	8.0114	8.77236	0.00305829	0.35332	69.34	133.163	64.13	80.37	63.52	96.13	178.55	124.81
Igfbp5	0.944439	6.08559	7.21494	0.0072299	0.582618	9.50333	18.2533	8.91	13.58	6.02	15.43	23.09	16.24
Fmod	0.942532	3.10429	4.41715	0.0355795	0.999918	2.63667	5.12333	3.83	2.63	1.45	9.03	2.57	3.77
Il18bp	0.942136	4.65671	5.6976	0.0169881	0.971534	15.8	30.85	16.62	13.59	17.19	16.02	53.9	22.63
Serping1	0.941788	7.61574	5.71781	0.0167936	0.971534	99.1967	189.267	97.28	86.4	113.91	109.38	328.88	129.54
Gng2	0.939784	0.61861	7.14625	0.00751208	0.593335	0.37	0.676667	0.22	0.37	0.52	0.76	0.58	0.69
Sh3tc1	0.938889	4.9051	10.6264	0.00111483	0.18204	5.56	10.4867	5.77	5.04	5.87	9.28	12.52	9.66
Gbp10	0.931401	6.3725	6.04977	0.0139081	0.885126	2.10333	6.42333	2.84	0.19	3.28	2.22	13.27	3.78
Ak4	0.929756	0.778043	6.05094	0.0138989	0.885126	0.29	0.536667	0.29	0.34	0.24	0.39	0.38	0.84
Dna2	0.921386	0.38415	4.33354	0.0373684	0.999918	0.21	0.466667	0.35	0.24	0.04	0.46	0.64	0.3
Tcf15	0.921083	2.54841	4.12045	0.0423679	0.999918	6.20667	11.7967	4.17	6.69	7.76	5.1	21.83	8.46
Flrt2	0.918426	2.39725	7.92378	0.00487893	0.452822	0.616667	1.15333	0.51	0.83	0.51	1.38	1.11	0.97
2010002M12Rik	0.917316	0.88577	7.35411	0.00669098	0.549298	0.356667	0.656667	0.44	0.36	0.27	0.76	0.77	0.44
Tnfaip3	0.916086	5.9652	8.80043	0.0030116	0.35332	12.3567	22.95	10.97	15.21	10.89	23.72	19.11	26.02
Rgs16	0.915645	2.6328	4.28558	0.038437	0.999918	2.40333	4.48667	1.54	4.41	1.26	4.35	6.04	3.07
Itga6	0.914355	4.16657	8.11583	0.00438803	0.427583	3.45333	6.45667	2.93	4.63	2.8	5.27	7.06	7.04
Plekha4	0.912031	2.33999	7.94093	0.0048329	0.452822	1.32333	2.44	1.66	1.49	0.82	2.79	2.4	2.13
Ifi44	0.908924	4.89719	6.14987	0.0131422	0.858391	9.37	17.2733	5.98	7.86	14.27	14.14	23.69	13.99
Lyve1	0.907417	6.04418	7.85261	0.00507473	0.456358	22.65	42.3467	17.4	26.62	23.93	29.77	51.58	45.69
4933409K07Rik	0.899471	2.47426	5.87778	0.0153331	0.935883	0.313333	0.606667	0.36	0.35	0.23	0.8	0.57	0.45
Gpr160	0.89129	0.420686	5.0946	0.0240004	0.999918	0.573333	1.14333	0.36	0.53	0.83	0.7	1.83	0.9
Nfkbid	0.890875	2.92383	8.24294	0.00409108	0.412767	2.21667	4.83	2.8	2.3	1.55	4.7	4.01	5.78
Adam19	0.886366	0.976203	3.87166	0.0491081	0.999918	0.236667	0.46	0.24	0.34	0.13	0.55	0.67	0.16
Pgf	0.885673	3.33639	5.96029	0.0146316	0.907892	6.02667	11.1733	7.05	6.64	4.39	6.7	16.17	10.65
Mest	0.885339	3.20729	9.00357	0.00269453	0.334391	3.02	5.78	3.54	3.16	2.36	5.66	5.99	5.69
Stil	0.884384	0.580048	3.89518	0.0484249	0.999918	0.236667	0.433333	0.44	0.15	0.12	0.67	0.34	0.29
Ankle1	0.882446	1.02039	5.75477	0.0164439	0.962591	0.62	0.97	0.59	0.47	0.8	1.42	0.51	0.98
Mx2	0.880779	1.7344	5.86269	0.0154652	0.936208	1.17333	2.16	0.78	1.7	1.04	1.6	3	1.88
Sele	0.879985	5.99564	5.70622	0.0169049	0.971534	15.4333	28.63	23.15	13.49	9.66	31.39	20.24	34.26
Lrmp	0.874707	1.28442	3.88758	0.0486446	0.999918	0.916667	1.68	0.93	1.08	0.74	0.69	3.2	1.15
Nlrc5	0.866383	3.73309	6.23568	0.0125201	0.827484	1.46667	2.60667	2.11	0.98	1.31	2.3	2.36	3.16
Wnt2	0.866328	2.39653	5.2287	0.0222172	0.999918	2.36	4.27	1.62	2.96	2.5	3.44	6.73	2.64
Il2rg	0.864737	7.68917	7.53634	0.00604669	0.510472	124.607	224.987	119.32	119.23	135.27	177.74	315.04	182.18
Bok	0.858824	4.81397	6.89712	0.00863349	0.641566	19.52	35.6133	19.97	18.08	20.51	31.74	51.05	24.05
Pde7b	0.855315	1.29598	6.72151	0.00952568	0.693008	0.426667	0.866667	0.33	0.56	0.39	1.02	0.72	0.86
4933404O12Rik	0.853585	2.03318	7.37181	0.00662544	0.548144	0.883333	1.59667	1.01	1	0.64	1.63	1.33	1.83
Apol10a	0.850884	0.953714	4.0067	0.0453198	0.999918	0.596667	1.05	0.42	0.48	0.89	0.85	1.73	0.57
Slc45a3	0.841932	4.79406	8.49914	0.00355314	0.380125	8.03333	14.2667	7.76	7.55	8.79	12.43	17.28	13.09
Sfrp2	0.841717	4.98574	3.98594	0.0458815	0.999918	15.4233	27.42	11.37	14.13	20.77	49.19	18.5	14.57
Gbp6	0.83935	7.32806	5.66224	0.0173339	0.976155	25.19	43.48	28.66	16.37	30.54	31.72	59.6	39.12
Pcdhb18	0.836125	0.879401	5.19297	0.0226784	0.999918	0.326667	0.59	0.24	0.29	0.45	0.48	0.91	0.38
Gjc2	0.833842	1.4844	5.96833	0.0145651	0.907892	1.15667	1.99667	0.68	1.42	1.37	1.81	1.94	2.24
Itih5	0.825408	3.40775	7.30455	0.00687802	0.557884	1.16333	2.05333	1.51	1.03	0.95	2.09	2.03	2.04
Pcdhb15	0.824449	0.699707	4.94248	0.0262044	0.999918	0.513333	0.926667	0.65	0.54	0.35	0.74	1.38	0.66
Nr4a1	0.823885	9.751	4.63579	0.0313117	0.999918	305.013	541.093	320.13	374.44	220.47	460.69	328.32	834.27
Nfkbie	0.823826	4.0205	5.41272	0.0199905	0.999918	6.08333	10.6533	5.57	5.4	7.28	9.14	16.47	6.35
Acp5	0.823515	1.1666	6.11171	0.0134289	0.867986	1.64333	2.8	1.28	2.17	1.48	3.2	3.19	2.01
Kdr	0.822849	5.03943	6.63004	0.0100273	0.707039	4.83	8.60667	3.15	6.03	5.31	8.45	10.35	7.02
Mastl	0.819882	1.04371	4.08717	0.04321	0.999918	0.376667	0.666667	0.5	0.2	0.43	0.85	0.36	0.79
Ptchd1	0.817059	4.14458	6.2633	0.0123264	0.827484	2.38	4.18	2.16	3.18	1.8	3.31	4.89	4.34
Nr2f2	0.815754	3.31302	3.98914	0.0457944	0.999918	2.01667	3.44333	2.37	2.04	1.64	2.43	6.11	1.79
Gbp4	0.814409	8.04714	5.5659	0.0183135	0.999918	44.78	77.5733	45.89	29.48	58.97	56.37	107.11	69.24
Ptgs2	0.811233	5.50038	4.00772	0.0452924	0.999918	9.61	16.6733	12.25	8.45	8.13	19.22	7.11	23.69
Arhgap27	0.809249	4.09189	5.50721	0.0189382	0.999918	3.64	6.15	2.46	4.92	3.54	5.09	8.15	5.21
Gas7	0.808756	0.291877	5.02974	0.0249157	0.999918	0.146667	0.246667	0.11	0.17	0.16	0.22	0.34	0.18
Cd274	0.807749	4.11179	5.42434	0.019858	0.999918	4.46333	7.65333	4.61	3.15	5.63	5.04	10.56	7.36
Gbp11	0.802294	4.32412	5.67701	0.0171886	0.974021	0.26	0.683333	0.43	0.17	0.18	0.58	0.95	0.52
Sox4	0.795748	4.6231	5.18908	0.0227293	0.999918	7.37	12.8933	10.19	5.78	6.14	13.51	16.68	8.49
Vcam1	0.79396	10.4915	7.34421	0.00672791	0.549298	340.473	583.59	371.19	384.9	265.33	550.57	571.97	628.23
Cfb	0.793512	6.69582	5.84182	0.0156496	0.939457	35.2267	61.43	32.57	39.46	33.65	45.56	89.48	49.25
Il7	0.789356	3.13364	6.64144	0.00996332	0.707039	3.14	5.51667	2.91	2.91	3.6	4.66	7.18	4.71
Srgap3	0.789332	1.23324	4.50426	0.0338104	0.999918	0.196667	0.343333	0.32	0.17	0.1	0.3	0.47	0.26
Isg15	0.787068	4.46573	3.89618	0.0483961	0.999918	38.2433	65.57	32.73	38.42	43.58	40.37	113.35	42.99
Sept1	0.781145	0.655384	4.90219	0.0268227	0.999918	0.983333	1.71	0.8	0.77	1.38	1.32	2.41	1.4
Irgm2	0.780572	7.52294	5.01741	0.0250937	0.999918	44.8233	76.0833	56.21	31.41	46.85	59.09	108.58	60.58
Tap1	0.77537	6.55175	4.23145	0.0396815	0.999918	30.3667	51.3733	35.66	18.49	36.95	34.07	78.63	41.42
Samd5	0.77058	2.14086	4.06568	0.043763	0.999918	1.55333	2.75333	1.84	1.37	1.45	4.68	1.6	1.98
Ccrn4l	0.769089	2.76211	5.57948	0.0181722	0.999918	2.11	3.59667	1.67	2.61	2.05	2.51	4.1	4.18
Dach1	0.767743	0.76556	4.17025	0.0411398	0.999918	0.303333	0.526667	0.38	0.35	0.18	0.76	0.45	0.37
Tspan18	0.764047	4.13121	6.52625	0.0106294	0.732836	3.97667	6.56333	3.29	4.71	3.93	5.44	7.59	6.66
Lrrc33	0.755431	3.57418	4.72401	0.0297444	0.999918	2.92	5.04667	2.81	2.89	3.06	4.19	7.91	3.04
Urb2	0.755304	2.57117	3.94703	0.0469541	0.999918	0.933333	1.51667	0.84	1.2	0.76	1.72	0.82	2.01
Ncapg	0.752197	1.85374	5.40356	0.0200957	0.999918	0.713333	1.19667	0.83	0.64	0.67	0.99	1.6	1
Hspa12a	0.751992	2.65482	4.65656	0.0309351	0.999918	0.966667	1.60667	0.9	1.37	0.63	2.16	1.45	1.21
Arrdc4	0.750533	5.94123	6.2241	0.0126023	0.827484	23.0567	34.54	27.63	21.76	19.78	29.26	34.11	40.25
Amac1	0.749591	1.3566	4.1534	0.0415509	0.999918	1.70333	2.91667	2.13	1.61	1.37	2.37	4.48	1.9
Vav3	0.747856	0.914195	5.29579	0.0213771	0.999918	0.35	0.56	0.49	0.27	0.29	0.59	0.49	0.6
Cdca7	0.747312	1.61151	4.02681	0.0447827	0.999918	1.21667	2.07333	1.91	0.74	1	1.66	2.12	2.44
Emid1	0.730836	2.40096	5.35207	0.0206977	0.999918	2.34667	4.07	2.18	2.59	2.27	3.19	5.72	3.3
Ucp2	0.718484	4.40751	4.52601	0.0333834	0.999918	4.71667	7.74	4.35	5.75	4.05	4.86	9.64	8.72
Rnasel	0.718204	1.16396	4.10542	0.0427459	0.999918	0.406667	0.65	0.46	0.28	0.48	0.6	0.87	0.48
H2-Q6	0.714618	9.58581	5.32175	0.0210609	0.999918	276.83	500.36	340.66	173.78	316.05	428.11	463.56	609.41
Bst1	0.714457	4.78642	3.9547	0.0467407	0.999918	11.4467	18.7967	11.08	10.72	12.54	14.44	30.48	11.47
H2-Q8	0.714235	6.74231	5.39508	0.0201937	0.999918	16.71	29.9833	20.03	15.55	14.55	21.93	35.3	32.72
Tnfaip8l3	0.706195	2.35029	4.88578	0.0270787	0.999918	2.28333	3.61333	2.25	2.74	1.86	2.88	3.48	4.48
Rasd1	0.693836	4.62923	4.14584	0.041737	0.999918	15.88	25.99	15.36	17.29	14.99	15.54	35.6	26.83
Gbp5	0.693815	4.81405	4.04432	0.0443204	0.999918	7.91333	13.28	8.95	9.23	5.56	8.44	18.98	12.42
Zfp456	0.693545	2.28519	4.57457	0.0324499	0.999918	0.823333	1.57667	1.17	0.59	0.71	1.87	1.53	1.33
Slc39a4	0.690191	3.29893	4.00311	0.0454165	0.999918	4.19333	6.72667	3.47	2.69	6.42	5.62	7.86	6.7
Sgsm1	0.681483	2.35272	4.46897	0.0345158	0.999918	1.02	1.61667	1.18	0.98	0.9	1.21	1.88	1.76
Hmga1	0.680741	4.22693	4.5096	0.0337051	0.999918	10.8467	15.1767	10.9	9.98	11.66	12.01	18.58	14.94
Pvrl2	0.680212	4.80452	4.2081	0.0402313	0.999918	12.94	20.6233	10.38	11.59	16.85	15.74	28.67	17.46
Lmln	0.679636	1.42462	5.28837	0.0214684	0.999918	0.55	0.883333	0.55	0.57	0.53	0.82	0.92	0.91
Psd	0.678953	1.78732	4.8933	0.0269611	0.999918	0.203333	0.276667	0.25	0.24	0.12	0.2	0.35	0.28
Sema3a	0.678541	2.47935	5.65723	0.0173836	0.976155	0.786667	1.28667	0.81	0.72	0.83	1.44	1.29	1.13
H2-Q7	0.678065	9.41142	5.05912	0.0244967	0.999918	163.027	277.187	208.41	110.98	169.69	216.23	295.38	319.95
H2-Q9	0.678065	9.41142	5.05912	0.0244967	0.999918	43.48	86.4867	52.95	33.63	43.86	68.45	109.26	81.75
Hmga1-rs1	0.676691	4.21684	4.4694	0.034507	0.999918	0.48	3.14333	0	1.44	0	0.76	7.01	1.66
B2m	0.676383	11.6122	4.06824	0.0436967	0.999918	4612.93	7315.38	6047.6	3625.33	4165.85	6101.02	10009.1	5836.07
Radil	0.675966	3.68525	5.40693	0.0200569	0.999918	3.15667	4.97333	3.57	2.76	3.14	4.83	5.71	4.38
Nfkbia	0.675161	9.2858	4.34131	0.0371984	0.999918	414.31	655.36	427.05	453.18	362.7	429.91	805.9	730.27
Bcl3	0.671428	4.89988	4.23709	0.03955	0.999918	15.93	24.9967	14.49	20.23	13.07	19.17	33.51	22.31
Pfkfb4	0.66524	1.73404	4.1571	0.0414604	0.999918	0.873333	1.43667	0.57	1.31	0.74	1.35	1.62	1.34
Cntrob	0.635048	1.90567	4.2353	0.0395917	0.999918	0.893333	1.29	0.73	1.08	0.87	1.36	1.48	1.03
Tfpi2	0.629458	1.46954	4.38498	0.0362569	0.999918	1.99333	2.97667	2.18	1.77	2.03	3.02	2.48	3.43
Spn	0.626711	1.94887	3.92737	0.0475063	0.999918	1.38333	2.17667	1.41	1.62	1.12	2.17	2.22	2.14
Alg13	0.614384	2.00792	4.16904	0.0411691	0.999918	2.05333	3.00667	2.29	1.82	2.05	3.04	3.31	2.67
Ldlr	0.609753	4.92465	4.06434	0.0437978	0.999918	6.53333	9.98667	5.88	7.83	5.89	11.8	10.49	7.67
Nod2	0.598058	2.1943	3.85389	0.0496307	0.999918	0.94	1.34	0.87	0.9	1.05	1.24	1.1	1.68
Gbp9	0.589449	6.78158	4.0976	0.042944	0.999918	25.0433	36.3633	24.11	26.9	24.12	36.97	29.17	42.95
Slc16a9	0.577001	4.35604	4.19195	0.0406164	0.999918	5.77667	8.48667	5.17	6.24	5.92	8.45	8.94	8.07

## Sheet: GFP.edgeR.output
List of genes from GFPlow vs GFPhigh FACS sorted MAECs. EdgeR cutoff of CPM>1 in at least 2 out of 3 replicates. The FPKM each gene is presented for all samples analyzed.								Females	Females	Males	Females	Females	Males
Gene	logFC	logCPM	LR	PValue	FDR	GFPlow.average.FPKM	GFPhigh.average.FPKM	GFPlow.356	GFPlow.358	GFPlow.362	GFPhigh.357	GFPhigh.359	GFPhigh.363
Tec	5.5852	4.08864	164.599	1.11928e-37	7.44606e-34	0.27	15.63	0.23	0.19	0.39	13.09	23.12	10.68
Alpl	4.76377	5.1807	164.5	1.17641e-37	7.44606e-34	1.23333	35.4433	1.3	1.3	1.1	25.56	41.36	39.41
Hdc	4.42296	4.52032	136.889	1.27549e-31	5.38214e-28	0.913333	22.98	0.84	0.65	1.25	21	30.38	17.56
Tmem178	5.21509	2.39683	123.953	8.62751e-29	2.73039e-25	0.173333	7.82	0.22	0.16	0.14	4.73	7.38	11.35
Plac8	4.88921	3.03491	113.938	1.3442e-26	3.40323e-23	0.886667	35.4933	0.38	0.29	1.99	34.28	46.94	25.26
Tll1	3.86688	3.29889	110.575	7.33116e-26	1.54675e-22	0.253333	4.00667	0.3	0.21	0.25	3.67	5.47	2.88
D630042P16Rik	3.95966	3.48323	104.905	1.28107e-24	2.31672e-21	0.576667	12.2033	0.85	0.44	0.44	8.94	13.79	13.88
Gpr68	4.23759	1.49546	103.704	2.34916e-24	3.71725e-21	0.07	2.14	0.07	0.06	0.08	1.43	2.69	2.3
Lrmp	4.17499	2.26382	100.355	1.2739e-23	1.79181e-20	0.186667	4.33667	0.2	0.1	0.26	3.6	6.13	3.28
Clca1	4.58971	6.7859	90.3624	1.98297e-21	2.51024e-18	2.87333	71.3433	3.22	2	3.4	39.43	56.48	118.12
Cmah	3.86076	4.15013	89.6968	2.77603e-21	3.19471e-18	0.26	3.83667	0.24	0.23	0.31	2.42	3.47	5.62
Clca2	4.60233	4.21212	89.3431	3.31955e-21	3.50185e-18	0.0133333	0.0966667	0.03	0.01	0	0.11	0.13	0.05
Pla2g7	4.06622	3.54205	87.8094	7.20767e-21	7.01861e-18	0.79	14.79	0.93	0.61	0.83	14.37	22.48	7.52
Duox2	3.45047	2.06105	87.6012	8.00762e-21	7.2406e-18	0.113333	1.66333	0.15	0.03	0.16	1.68	1.62	1.69
Ccl2	4.11333	0.798631	83.093	7.82829e-20	6.60655e-17	0.23	6.15333	0.12	0.52	0.05	6.8	7.08	4.58
Dusp26	3.83639	1.36684	79.7818	4.18129e-19	3.30818e-16	0.203333	3.48667	0.14	0.27	0.2	1.99	4.52	3.95
Sybu	3.57346	3.21067	78.0046	1.028e-18	7.65499e-16	0.58	6.88	0.83	0.3	0.61	6.49	8.91	5.24
Lbp	3.84386	6.53096	77.2714	1.49006e-18	1.04792e-15	5.75333	85.9433	5.54	2.86	8.86	75.55	102.07	80.21
4930578C19Rik	3.45953	2.00002	76.8323	1.86105e-18	1.23995e-15	0.393333	3.93	0.54	0.23	0.41	3.1	4.53	4.16
Slc6a6	3.2108	6.00771	76.2268	2.52884e-18	1.60063e-15	2.30333	22.3033	2.55	2.01	2.35	22.72	30.61	13.58
Dkk2	2.78939	4.8534	75.5712	3.52466e-18	2.1247e-15	2.44667	17.1533	3	2.28	2.06	17.63	19.14	14.69
Ch25h	2.86403	4.20633	74.3286	6.61399e-18	3.80575e-15	4.37667	32.81	4.43	4.24	4.46	25.36	38.26	34.81
Tal2	4.09798	0.769741	72.3199	1.82993e-17	1.00718e-14	0.196667	3.88333	0.39	0.2	0	3.03	4.48	4.14
Vipr1	-2.8278	5.2304	71.3689	2.96301e-17	1.56286e-14	15.7833	2.28333	12.11	17.88	17.36	2.09	2.74	2.02
Nog	4.20058	1.9943	70.6213	4.32827e-17	2.19167e-14	0.273333	5.06333	0.17	0.13	0.52	4.46	4.57	6.16
Nfatc2	2.97394	1.75397	68.0123	1.62483e-16	7.91104e-14	0.12	1.04667	0.14	0.14	0.08	0.9	1.19	1.05
Meox2	4.33576	4.8081	66.6254	3.28324e-16	1.53935e-13	1.39667	29.5367	0.96	0.92	2.31	20.03	51.43	17.15
Oxtr	3.3875	1.39331	65.3026	6.4237e-16	2.9042e-13	0.106667	1.26	0.1	0.12	0.1	0.81	1.94	1.03
Gap43	3.22621	3.23719	63.7021	1.4473e-15	6.31769e-13	1.56667	16.44	1.72	1.17	1.81	11.25	14.24	23.83
Sh3bgrl2	3.19613	3.47738	63.3732	1.71032e-15	7.21697e-13	0.713333	6.94667	0.81	0.47	0.86	6.4	10.05	4.39
Htr2b	5.20015	5.93934	62.8507	2.22979e-15	9.10545e-13	1.78333	68.8367	1	0.52	3.83	47.38	75.69	83.44
Csf2rb2	4.42541	2.29174	62.5648	2.5782e-15	1.01992e-12	0.0633333	2.13667	0.04	0.02	0.13	2.33	3.49	0.59
Gprc5c	2.75385	2.85336	61.7281	3.94306e-15	1.51258e-12	0.47	4.83667	0.59	0.25	0.57	4.95	5.65	3.91
Gpr30	2.74474	4.27833	60.9303	5.91311e-15	2.20159e-12	2.47	17.0233	2.82	2.36	2.23	11.56	21.03	18.48
Hist1h2bm	2.91483	2.38556	60.5592	7.13982e-15	2.58237e-12	0.726667	18.0233	0.38	0.98	0.82	11.77	23.36	18.94
Slc6a4	3.25524	0.0626926	60.3665	7.87423e-15	2.75487e-12	0.06	0.813333	0.06	0.04	0.08	0.51	1.16	0.77
Flrt3	3.7648	3.28646	60.3225	8.05199e-15	2.75487e-12	0.383333	5.58333	0.61	0.25	0.29	3.99	9.57	3.19
Adrb2	2.63381	3.6524	60.2129	8.51321e-15	2.83602e-12	2.06	13.0133	1.98	1.82	2.38	9.96	13.65	15.43
Ptn	4.5338	5.41783	59.4405	1.26049e-14	4.09143e-12	1.2	27.4933	1.13	0.37	2.1	17.04	27.43	38.01
Slc35f2	3.839	1.14025	59.16	1.45357e-14	4.60019e-12	0.106667	1.87667	0.15	0.01	0.16	1.78	1.33	2.52
Slc16a12	4.25373	2.86872	59.0519	1.53571e-14	4.74159e-12	0.206667	4.26	0.27	0.05	0.3	5.57	5.07	2.14
Il33	2.92498	6.11007	58.8258	1.72269e-14	5.19226e-12	7.88667	61.3933	9.11	7.29	7.26	36	62.97	85.21
Lpar3	3.65219	-0.109836	58.7055	1.83133e-14	5.39135e-12	0.06	0.866667	0.03	0.08	0.07	0.47	1.1	1.03
Irf8	3.322	2.8371	58.4265	2.11027e-14	6.07135e-12	0.52	5.60333	0.25	0.62	0.69	3.84	4.99	7.98
Hist2h2bb	3.18366	0.859572	57.0933	4.15622e-14	1.16919e-11	0.54	3.74	1.09	0.25	0.28	2.43	4.81	3.98
Fam174b	2.4594	6.56052	56.5743	5.41155e-14	1.48923e-11	13.1267	75.0433	14.3	12.8	12.28	60.12	99.22	65.79
Grb7	2.95687	0.895042	56.2754	6.29986e-14	1.69681e-11	0.126667	1.62	0.11	0.07	0.2	1.15	1.39	2.32
Wnt2	4.10781	3.68017	55.9959	7.26214e-14	1.91524e-11	0.803333	14.68	0.55	0.46	1.4	7.69	11.22	25.13
Hapln1	3.11791	1.31819	55.832	7.89379e-14	2.03934e-11	0.12	1.06667	0.2	0.1	0.06	0.9	1.51	0.79
Pla2g5	-2.60477	6.2031	55.3177	1.02541e-13	2.59614e-11	78.58	13.1567	78.37	70.25	87.12	18.31	9.32	11.84
Stc1	3.90604	5.8181	54.8919	1.27345e-13	3.16089e-11	2.21667	34.5833	1.6	0.93	4.12	23.64	41.68	38.43
Pde9a	2.66215	4.24784	53.8091	2.20947e-13	5.37879e-11	2.88333	19.4267	2.77	2.75	3.13	15.67	28.63	13.98
Il17ra	2.83167	2.87589	53.5415	2.53184e-13	6.04727e-11	0.483333	3.81333	0.37	0.32	0.76	3.43	3.35	4.66
Slfn3	2.38567	3.4915	53.0875	3.19021e-13	7.47868e-11	1.73333	10.25	1.41	2.45	1.34	9.78	11.13	9.84
Flrt2	2.6136	3.11714	52.9047	3.50138e-13	8.05891e-11	0.393333	2.53	0.38	0.36	0.44	2.77	3.21	1.61
Dach2	4.12284	0.517989	52.2882	4.79242e-13	1.08334e-10	0.0266667	0.72	0.02	0.02	0.04	0.91	0.97	0.28
Clca4	3.95924	1.77781	51.9255	5.76466e-13	1.28026e-10	0	0.01	0	0	0	0	0.01	0.02
Popdc3	-2.83533	0.672733	51.8121	6.10746e-13	1.33301e-10	1.73333	0.276667	1.58	1.58	2.04	0.29	0.17	0.37
Slfn2	2.30584	6.03613	51.6794	6.53463e-13	1.40207e-10	16.74	83.9133	13.81	15.87	20.54	78.38	89.11	84.25
Dusp2	4.49957	3.28332	51.4491	7.34761e-13	1.55022e-10	0.646667	14.92	0.43	0.13	1.38	7.95	16.87	19.94
Lamc3	-2.60711	4.40883	50.9191	9.62526e-13	1.99748e-10	6.84	1.13333	5.15	7.49	7.88	1.4	0.77	1.23
Sgpp2	3.65973	1.28651	50.8397	1.00227e-12	2.04642e-10	0.07	1.36	0.07	0.13	0.01	1.52	1.82	0.74
Gpr1	4.496	1.92659	50.7234	1.06345e-12	2.13686e-10	0.266667	5.71333	0.49	0.04	0.27	4.99	9.33	2.82
Gatm	3.44401	2.36845	50.6594	1.09868e-12	2.17316e-10	0.426667	4.96333	0.38	0.17	0.73	3.14	5.55	6.2
Rab3il1	3.39085	4.85642	50.5643	1.15325e-12	2.24601e-10	2.53667	27.85	2.55	1.97	3.09	11.87	25.85	45.83
Pdcd1	5.29086	1.32845	50.475	1.20693e-12	2.31492e-10	0.0433333	2.75333	0.08	0.01	0.04	0.94	1.46	5.86
Lgr6	-3.26829	2.446	50.0832	1.47366e-12	2.78434e-10	2.94333	0.333333	3.65	1.79	3.39	0.54	0.32	0.14
Klrb1f	7.07418	2.5953	49.8433	1.66528e-12	3.10011e-10	0.0233333	8.09667	0.03	0.04	0	1.68	3.04	19.57
Tmem100	3.52622	4.35996	49.8033	1.69955e-12	3.11806e-10	2.39333	27.8133	2.98	1.78	2.42	17.59	14.87	50.98
4833423E24Rik	4.11012	-0.510895	49.7547	1.74217e-12	3.15059e-10	0.0133333	0.786667	0	0	0.04	1.19	0.86	0.31
Agr2	2.43486	2.5613	49.5589	1.92502e-12	3.43222e-10	3.39333	20.2933	3.47	3.76	2.95	15.44	26.94	18.5
Arhgap42	2.7082	2.76103	49.5298	1.95379e-12	3.43515e-10	0.283333	2.07667	0.25	0.38	0.22	1.56	2.29	2.38
Tac2	-2.43684	2.22291	49.3758	2.11332e-12	3.66472e-10	15.6433	2.68667	15.21	18.37	13.35	2.06	2.43	3.57
Apold1	3.12263	5.35017	49.1436	2.37895e-12	4.0696e-10	2.99667	27.15	3.02	1.32	4.65	21.65	26.75	33.05
Fabp4	3.65298	8.31103	48.7182	2.95507e-12	4.98776e-10	111.64	1438.2	91.74	40.16	203.02	1142.29	1855.53	1316.78
Nts	5.79576	6.54706	48.6266	3.09643e-12	5.15759e-10	3.31333	198.78	5.52	0.56	3.86	106.47	60.81	429.06
Nrp2	3.54743	4.02723	48.3126	3.63418e-12	5.97469e-10	0.516667	6.54667	0.55	0.14	0.86	6.87	7.97	4.8
Csf2rb	3.89349	3.30622	47.8798	4.53164e-12	7.35461e-10	0.263333	4.42	0.17	0.05	0.57	4.27	6.24	2.75
Cyfip2	2.95188	2.19208	47.7773	4.7748e-12	7.65117e-10	0.126667	1.45	0.09	0.08	0.21	0.86	1.11	2.38
Ncam2	3.37973	0.0515103	47.4992	5.50266e-12	8.70727e-10	0.0233333	0.46	0.02	0.03	0.02	0.55	0.6	0.23
Masp1	4.37368	2.58159	47.4513	5.63885e-12	8.81262e-10	0.133333	4.2	0.11	0.13	0.16	4.3	7.57	0.73
Nr2f2	3.18322	4.47241	47.0992	6.74824e-12	1.04178e-09	1.18667	10.8033	1.52	0.44	1.6	7.5	13.46	11.45
Duoxa2	6.08993	3.74127	46.9625	7.23576e-12	1.10358e-09	0.236667	20.9567	0.31	0.04	0.36	5.88	6.43	50.56
Upp1	2.1076	4.19945	46.925	7.37569e-12	1.10934e-09	7.01333	31.7933	7.71	6.33	7	28.79	37.31	29.28
Adra2a	-2.12622	6.74541	46.9057	7.44874e-12	1.10934e-09	55.1133	13.2167	52.87	59.56	52.91	13.93	15.63	10.09
Ccl5	2.70986	2.22999	46.3657	9.81164e-12	1.43975e-09	3.08	21.6067	1.4	4.12	3.72	21.65	17.42	25.75
Comp	3.28217	4.55242	46.3492	9.89477e-12	1.43975e-09	2.12667	21.4233	1.91	0.87	3.6	14.48	29.57	20.22
Frzb	-2.3126	7.78944	46.1103	1.11779e-11	1.60797e-09	157.387	32.62	165.4	174.27	132.49	44.86	24.22	28.78
Pde2a	3.74344	5.67201	46.0609	1.14632e-11	1.63048e-09	1.99667	28.7667	1.73	0.83	3.43	22.68	49.09	14.53
Pglyrp1	2.76782	3.14336	45.5447	1.49194e-11	2.0985e-09	4.81333	33.1467	5.09	4.17	5.18	20.79	25.6	53.05
Bok	2.49023	4.651	45.2835	1.70476e-11	2.36342e-09	6.86667	39.65	6.99	4.98	8.63	27.33	39.91	51.71
Dlk1	3.61199	0.942608	45.2688	1.71763e-11	2.36342e-09	0.0666667	0.97	0.1	0.03	0.07	0.5	1.89	0.52
Rasgrp3	3.43708	3.57253	44.7313	2.26012e-11	3.07644e-09	0.443333	5.39	0.51	0.1	0.72	4.59	5.59	5.99
Gpm6a	2.07973	7.38314	43.4617	4.32329e-11	5.82219e-09	23.2967	100.97	25.91	22.68	21.3	78.58	117.88	106.45
Wdr72	3.38407	-0.0567794	43.3441	4.59113e-11	6.11781e-09	0.01	0.39	0.01	0.02	0	0.41	0.52	0.24
Ank3	2.9819	2.29927	43.0293	5.39268e-11	7.11104e-09	0.106667	1.31	0.11	0.07	0.14	0.75	0.78	2.4
Kdr	2.7742	5.71066	42.7426	6.24391e-11	8.14862e-09	2.56667	18.95	2.7	1.17	3.83	17.9	24.07	14.88
Tmem108	3.54924	2.34365	42.4324	7.3166e-11	9.45111e-09	0.23	2.75333	0.13	0.08	0.48	1.9	2.31	4.05
Bean1	2.53174	4.27474	42.3929	7.46605e-11	9.54675e-09	2.14667	12.79	2.15	2.16	2.13	6.58	16.22	15.57
Ubash3b	2.51734	1.20497	41.7219	1.05225e-10	1.33205e-08	0.213333	1.38667	0.18	0.16	0.3	1.28	0.97	1.91
Olr1	3.8092	3.15535	41.4783	1.19189e-10	1.49388e-08	0.336667	5.28333	0.2	0.52	0.29	6.5	8.16	1.19
Robo4	2.45102	5.11875	41.3349	1.28257e-10	1.59177e-08	3.28667	18.2833	2.31	2.76	4.79	13.23	22.88	18.74
Trp53i11	2.23577	5.33295	41.3096	1.29931e-10	1.59689e-08	6.30333	30.6333	6.8	4.05	8.06	30.26	28.12	33.52
Hist1h2bb	2.4015	2.80462	40.9433	1.5671e-10	1.90749e-08	0.673333	19.58	0.6	0.41	1.01	9.7	26.04	23
Stc2	2.38297	0.832427	40.8501	1.64362e-10	1.98158e-08	0.373333	2.09	0.5	0.21	0.41	1.87	2.14	2.26
Egln3	2.62696	1.89222	40.8263	1.66376e-10	1.98693e-08	0.446667	2.91333	0.41	0.27	0.66	1.98	4.09	2.67
Ifi27l2a	3.39182	5.58305	40.5455	1.92088e-10	2.27257e-08	34.5067	356.483	42.34	25.76	35.42	234.7	146.47	688.28
Camk4	-2.06673	5.17915	40.5162	1.94997e-10	2.28561e-08	5.41333	1.30667	4.33	5.84	6.07	1.22	1.13	1.57
Lrg1	5.13912	7.97256	40.2644	2.21817e-10	2.57613e-08	13.3767	479.45	4.9	3.22	32.01	211.41	472.91	754.03
Lgals3	2.52162	3.74524	39.944	2.61344e-10	3.00759e-08	3.70667	22.1667	4.71	2	4.41	15.79	22.08	28.63
BC028528	2.93123	3.38832	39.8107	2.79812e-10	3.19112e-08	5.07333	42.05	6.13	2.64	6.45	24.5	30.18	71.47
2010110P09Rik	1.95619	5.19239	39.7424	2.89763e-10	3.2751e-08	15.6567	63.2167	18.27	12.33	16.37	55.44	71.01	63.2
Atp6v0d2	4.17239	4.71619	39.4051	3.44397e-10	3.85816e-08	1.31333	25.45	1.25	2.18	0.51	20.27	48.7	7.38
Kcnq4	-2.09923	3.97773	39.3368	3.56657e-10	3.96046e-08	10.5833	2.52333	9.53	8.73	13.49	2.84	2.89	1.84
Lyn	1.99423	4.72829	38.9263	4.40112e-10	4.84468e-08	3.52333	14.8433	3.37	3.27	3.93	12.22	14.51	17.8
Enpp2	2.47621	4.94484	38.7081	4.92164e-10	5.37095e-08	3.44	20.0033	5.09	2.22	3.01	20.06	27.11	12.84
Thsd1	1.86868	5.38613	38.1383	6.59043e-10	7.10188e-08	4.66667	17.8767	4.53	4.61	4.86	15.13	19.97	18.53
Igfbp5	3.22927	7.03353	38.1296	6.61997e-10	7.10188e-08	4.99667	46.7767	5.62	1.98	7.39	35.42	29.48	75.43
Prg2	3.28976	-0.376382	37.9825	7.13835e-10	7.59365e-08	0.0833333	2.25	0	0	0.25	1.1	2.27	3.38
Tmc8	1.89352	2.73862	37.6362	8.52498e-10	8.99314e-08	1.09	4.36667	1.04	1.12	1.11	3.69	4.8	4.61
Adamtsl1	2.89717	3.49782	37.3577	9.83321e-10	1.02875e-07	0.316667	2.6	0.28	0.12	0.55	2.78	1.49	3.53
Pvt1	1.93511	2.65612	36.8929	1.24802e-09	1.29497e-07	0.776667	3.28333	0.66	0.7	0.97	3.52	3.77	2.56
Samd5	2.32127	3.12352	36.7415	1.34874e-09	1.38811e-07	1.41667	7.29667	1.5	1.1	1.65	7.45	10.47	3.97
Ralgps2	2.55645	2.46651	36.4456	1.56985e-09	1.60264e-07	0.253333	1.48	0.38	0.15	0.23	0.96	1.22	2.26
Glt25d2	2.7428	1.27347	36.0732	1.90043e-09	1.9246e-07	0.143333	1.17	0.08	0.09	0.26	0.73	0.91	1.87
Ttyh1	2.93585	3.16527	36.0072	1.96593e-09	1.96104e-07	0.446667	4.55667	0.52	0.23	0.59	3.01	2.13	8.53
Gpr182	2.33561	4.9356	36.0057	1.96739e-09	1.96104e-07	7.52667	39.53	7.46	6.7	8.42	22.02	38.7	57.87
Cyp1a1	4.09802	1.80657	35.5431	2.49465e-09	2.46666e-07	0.146667	3.06667	0.09	0.13	0.22	0.97	1.38	6.85
Marcksl1	2.30817	4.48947	35.5147	2.53133e-09	2.46666e-07	6.11	30.6633	6.34	4.99	7	21.96	24.23	45.8
Ephx4	2.2702	0.855971	35.5027	2.54703e-09	2.46666e-07	0.613333	3.12667	0.9	0.53	0.41	2.27	3.42	3.69
Slc25a21	-2.42182	1.20826	35.4984	2.55259e-09	2.46666e-07	1.67333	0.273333	2.07	1.71	1.24	0.44	0.15	0.23
Nostrin	2.25177	3.10999	35.4642	2.59783e-09	2.49135e-07	1.93333	9.75667	2.54	1.56	1.7	11.9	11.83	5.54
Hoxd10	3.578	2.31026	35.4362	2.63538e-09	2.50836e-07	0.476667	6.52667	0.36	0.33	0.74	3.25	3.07	13.26
Fam167b	2.63543	0.839742	35.3895	2.69943e-09	2.55016e-07	0.746667	4.29333	0.6	0.67	0.97	3.82	6.87	2.19
Gpr126	3.345	3.91114	35.2456	2.9064e-09	2.72534e-07	0.453333	5.08	0.46	0.28	0.62	4.84	9.09	1.31
Lhfpl2	2.03844	3.53584	35.1849	2.99839e-09	2.79093e-07	1.25333	5.20333	1.41	1	1.35	3.67	5.98	5.96
Rasd1	2.1658	4.62122	35.1	3.13206e-09	2.89407e-07	6.82333	32.2467	6.31	6.45	7.71	21.92	28.71	46.11
Kcnk5	4.38806	2.65993	34.6865	3.87308e-09	3.55285e-07	0.17	4.30667	0.19	0.04	0.28	1.84	1.73	9.35
Pcolce2	-1.81922	7.75925	34.5787	4.09367e-09	3.72818e-07	225.463	65.61	227.6	215.17	233.62	72.03	51.44	73.36
Zg16	4.89745	-0.278435	34.4304	4.41767e-09	3.99452e-07	0.06	2.99667	0.09	0.02	0.07	0.49	1.41	7.09
Gxylt2	-1.82107	8.19976	34.3571	4.58726e-09	4.11845e-07	256.513	76.2433	205.84	262.52	301.18	67.97	85.83	74.93
Mfsd7c	2.07753	1.01624	34.3083	4.70381e-09	4.12919e-07	0.24	1.07	0.38	0.13	0.21	0.91	1.15	1.15
Lepr	2.78082	4.80671	34.308	4.7045e-09	4.12919e-07	1.55	11.2967	2.13	0.76	1.76	9.2	18.61	6.08
Lhx6	4.19963	3.70503	34.3013	4.72077e-09	4.12919e-07	0.466667	9.30333	0.16	0.09	1.15	9.14	12.97	5.8
Mbnl3	2.23306	0.708698	34.2976	4.7297e-09	4.12919e-07	0.0733333	0.37	0.05	0.07	0.1	0.28	0.48	0.35
Col13a1	2.39545	0.0547143	34.0832	5.28063e-09	4.57859e-07	0.0533333	0.433333	0.04	0.04	0.08	0.22	0.45	0.63
8430408G22Rik	3.48638	5.90483	33.9273	5.72113e-09	4.92679e-07	9.82333	112.287	7.51	4.52	17.44	48.42	84.59	203.85
Lars2	-2.3615	9.33717	33.8934	5.8216e-09	4.97944e-07	322.333	64.47	399.25	276.57	291.18	103.74	35.7	53.97
Ifitm6	4.79903	-0.951488	33.7839	6.15865e-09	5.23238e-07	0.0866667	1.60333	0.23	0.03	0	0.32	0.76	3.73
Itga6	2.38993	4.51481	33.6842	6.48264e-09	5.47091e-07	1.94333	10.7333	1.81	1.28	2.74	9.29	16.24	6.67
C920021L13Rik	2.54636	3.03358	33.2193	8.23305e-09	6.90213e-07	0.143333	0.28	0.19	0.14	0.1	0.28	0.23	0.33
Ednrb	4.11291	6.24367	33.0586	8.94236e-09	7.44745e-07	2.38667	44.01	2.39	0.26	4.51	42	36.7	53.33
Crispld2	-2.05725	6.07666	32.885	9.7774e-09	8.08968e-07	30.4967	7.56667	41.15	29.48	20.86	9.56	5.49	7.65
Adamts9	2.44137	1.88473	32.766	1.03947e-08	8.54458e-07	0.196667	1.16	0.15	0.08	0.36	1.32	1.19	0.97
Dclk1	2.19241	3.00438	32.7316	1.05805e-08	8.6412e-07	0.503333	2.51	0.67	0.51	0.33	3.06	3.11	1.36
Gpr77	2.15638	0.590477	32.6299	1.11486e-08	9.0468e-07	0.133333	0.75	0.12	0.19	0.09	0.72	0.73	0.8
Pcdhb9	2.22734	2.29536	32.1255	1.4453e-08	1.16536e-06	0.656667	3.28333	0.58	0.7	0.69	2.01	2.86	4.98
Hapln3	2.43493	0.97697	32.008	1.53538e-08	1.23015e-06	0.513333	2.81	0.35	0.46	0.73	1.78	4.54	2.11
Prox1	3.46405	3.55629	31.8577	1.65887e-08	1.32073e-06	0.536667	5.88	0.53	0.08	1	5.14	4.95	7.55
Ptchd1	1.92083	4.39454	31.8357	1.67781e-08	1.32747e-06	1.57667	6.31	1.59	1.57	1.57	5.03	9.05	4.85
Slc10a6	2.69985	4.93311	31.7753	1.73078e-08	1.36086e-06	4.68333	30.68	4.07	4.26	5.72	12.94	24.68	54.42
Gimap8	1.72969	2.65519	31.6204	1.87452e-08	1.46478e-06	0.93	3.26333	0.92	0.88	0.99	3.29	3.62	2.88
Hmcn1	1.90274	2.07848	31.4429	2.05394e-08	1.58968e-06	0.0666667	0.376667	0.07	0.06	0.07	0.33	0.38	0.42
Epor	2.87389	0.595971	31.4377	2.05946e-08	1.58968e-06	0.16	1.67333	0.11	0.09	0.28	0.83	1.04	3.15
Sfrp1	-1.73125	9.72006	31.3867	2.11425e-08	1.61498e-06	345.61	107.587	275.33	404.1	357.4	120.35	103.91	98.5
Lrrc33	1.99402	3.82262	31.3835	2.11776e-08	1.61498e-06	1.78667	7.56667	1.65	1.61	2.1	6.63	11.03	5.04
3632451O06Rik	-1.87022	2.18016	31.262	2.25445e-08	1.70893e-06	2.97667	0.823333	2.88	3.5	2.55	0.91	0.57	0.99
Otos	5.33493	-0.68934	31.0978	2.45355e-08	1.84741e-06	0.03	2.20667	0.07	0.02	0	0.35	0.51	5.76
Cyyr1	1.81172	2.3911	31.0877	2.46633e-08	1.84741e-06	0.976667	3.25	0.94	0.98	1.01	2.06	3.95	3.74
Ctla2a	1.8563	7.8771	30.9133	2.69819e-08	2.0092e-06	93.3233	343.2	72.84	99.58	107.55	266.85	329.37	433.38
Nr4a2	1.80687	4.56599	30.8149	2.83856e-08	2.10137e-06	3.17667	12.8767	3.52	2.72	3.29	8.75	14.72	15.16
Bst1	1.73635	4.84795	30.7673	2.90896e-08	2.14096e-06	6.87667	23.27	6.02	6.55	8.06	21.66	28.36	19.79
Prss23	2.41416	8.27865	30.6413	3.10417e-08	2.27142e-06	37.3267	204.003	47.02	26.43	38.53	107.76	174.62	329.63
Rem1	2.15356	2.49845	30.5823	3.20007e-08	2.32815e-06	1.44	6.32333	2.27	0.94	1.11	3.96	6.33	8.68
Aldh1a1	-1.79896	3.87208	30.4816	3.37056e-08	2.43816e-06	13.76	4.04333	12.76	11.8	16.72	3.34	3.98	4.81
Rgs16	3.37779	2.86049	30.4172	3.48419e-08	2.50604e-06	0.64	7.16	0.13	0.3	1.49	4.3	7.09	10.09
Syt17	1.90132	0.868258	30.3849	3.54272e-08	2.53375e-06	0.376667	1.52667	0.38	0.38	0.37	1.15	1.92	1.51
Kbtbd11	2.74671	1.90706	30.3534	3.60082e-08	2.56083e-06	0.133333	1.04	0.14	0.09	0.17	0.59	0.64	1.89
Lypd1	2.25788	1.9115	30.301	3.69938e-08	2.61623e-06	0.0833333	2.37667	0.07	0.07	0.11	1.01	2.14	3.98
St8sia6	1.88843	3.48942	30.2248	3.84762e-08	2.70595e-06	1.85	7.03667	2.03	1.64	1.88	5.61	10.2	5.3
Col4a3	-1.89141	7.55273	30.0482	4.21439e-08	2.94751e-06	40.2233	11.1033	34.45	35.13	51.09	14.64	8.25	10.42
Lrrn4cl	3.6126	3.90407	29.7947	4.80295e-08	3.33181e-06	1.04333	13.22	1.07	0.69	1.37	6.78	3.38	29.5
Lcn2	3.81509	4.77544	29.7893	4.8165e-08	3.33181e-06	5.98667	79.7833	4.94	2	11.02	34.02	40.36	164.97
Mir5109	-1.85833	1.48833	29.7655	4.87589e-08	3.35456e-06	234.373	47.2	213.23	200.68	289.21	33.64	34.99	72.97
Gm10790	4.14685	0.240134	29.7314	4.96241e-08	3.39563e-06	0.06	0.966667	0.12	0.06	0	0.19	0.49	2.22
Tmem171	1.68243	2.66748	29.6649	5.13563e-08	3.49527e-06	2.99	9.50333	2.68	3.18	3.11	10.23	10.27	8.01
Cd36	3.30779	7.6334	29.6453	5.18789e-08	3.51195e-06	12.6533	128.397	10.43	3.04	24.49	83.57	184.41	117.21
Omd	-1.71296	5.61413	29.3745	5.96575e-08	4.01704e-06	51.66	15.9733	59	48.64	47.34	20.8	12.92	14.2
Gngt2	2.15927	6.68063	29.2383	6.40024e-08	4.2868e-06	102.277	471.293	98.02	89.54	119.27	332.66	330.24	750.98
Ebf3	2.41441	0.0804027	29.1061	6.85226e-08	4.56156e-06	0.04	0.326667	0.02	0.05	0.05	0.22	0.53	0.23
Sort1	-1.59655	5.32531	29.0975	6.88251e-08	4.56156e-06	10.1967	3.47333	9.34	10.96	10.29	3.63	3.72	3.07
Nrcam	2.18767	0.812227	28.9284	7.51032e-08	4.95173e-06	0.0633333	0.413333	0.09	0.05	0.05	0.5	0.33	0.41
Slfn4	2.03233	0.499564	28.7867	8.08041e-08	5.3e-06	0.0633333	0.13	0.11	0.08	0	0.18	0.21	0
Thy1	3.36977	1.85709	28.7567	8.20675e-08	5.35512e-06	0.376667	4.27667	0.52	0.17	0.44	2.3	1.48	9.05
Pax9	-1.80132	2.4245	28.5563	9.10139e-08	5.87113e-06	3.49333	1.02333	3.17	4.43	2.88	1.13	0.97	0.97
Rps6ka2	-1.69931	5.61407	28.548	9.14063e-08	5.87113e-06	16.1767	5.13667	13.02	15.27	20.24	5.46	5.62	4.33
Cmbl	2.30687	0.672319	28.5426	9.16573e-08	5.87113e-06	0.606667	3.39	0.44	0.71	0.67	1.5	3.63	5.04
Renbp	2.39382	3.06458	28.539	9.18307e-08	5.87113e-06	2.35	12.6633	2.06	1.78	3.21	6.53	10.27	21.19
9530026P05Rik	1.97815	0.81269	28.5158	9.29347e-08	5.91186e-06	0.166667	1.02	0.09	0.25	0.16	0.75	1.62	0.69
1700025G04Rik	2.67222	2.88627	28.4346	9.6919e-08	6.13449e-06	0.233333	1.45333	0.28	0.17	0.25	0.74	0.86	2.76
Pcdh1	2.10476	1.89296	28.3254	1.02542e-07	6.45809e-06	0.423333	1.83667	0.33	0.29	0.65	1.38	2.4	1.73
Sdc3	-1.66059	6.52097	28.2718	1.05422e-07	6.60665e-06	33.01	10.67	27.73	32.14	39.16	10.66	12.44	8.91
Adamtsl3	-1.85301	3.505	28.2469	1.06787e-07	6.6592e-06	2.72333	0.706667	2.48	3.54	2.15	0.85	0.51	0.76
Psg22	5.14321	-0.0401621	28.1138	1.14386e-07	7.0981e-06	0.00666667	1.23	0.02	0	0	0.06	1.11	2.52
Kcnh2	-1.66974	3.47766	28.0667	1.17204e-07	7.23747e-06	4.22333	1.38	4.45	3.36	4.86	1.62	1.21	1.31
Lama2	-1.91668	1.58506	27.9754	1.22868e-07	7.55041e-06	0.496667	0.11	0.53	0.46	0.5	0.14	0.11	0.08
Cit	1.91239	1.59118	27.9621	1.23718e-07	7.56591e-06	0.133333	0.59	0.06	0.14	0.2	0.51	0.79	0.47
Cxcl17	3.87646	0.800707	27.9071	1.27283e-07	7.74652e-06	0.17	5.50333	0.4	0	0.11	2.77	1.62	12.12
Pthlh	1.67448	7.45441	27.7396	1.38795e-07	8.40672e-06	73.78	240.397	72.19	84.62	64.53	191.1	244.49	285.6
Rhpn1	3.63353	0.230192	27.507	1.56525e-07	9.43547e-06	0.0266667	0.99	0.05	0	0.03	0.23	0.66	2.08
Rhbdl2	1.87672	1.6607	27.469	1.59636e-07	9.57738e-06	1.05	4.32667	0.65	1.4	1.1	3.94	3.94	5.1
Ppm1j	2.10788	1.52783	27.1368	1.89557e-07	1.13189e-05	0.7	3.11667	0.71	0.39	1	2.26	2.48	4.61
Dnahc6	2.33229	2.17019	27.0973	1.93464e-07	1.14979e-05	0.0666667	0.54	0.06	0.08	0.06	0.23	0.51	0.88
Meox1	3.07549	4.2567	27.0815	1.95054e-07	1.15382e-05	2.3	19.5767	2.26	1.41	3.23	7.18	11.19	40.36
Shisa9	-2.21212	3.74515	26.9607	2.07634e-07	1.22253e-05	5.27667	1.14333	4.39	8.33	3.11	1.33	1.49	0.61
Cenpm	1.75338	0.766122	26.9294	2.11022e-07	1.23672e-05	0.706667	2.22667	0.58	0.59	0.95	1.87	2.23	2.58
C1qtnf7	-1.72112	3.47515	26.8812	2.16348e-07	1.2621e-05	13.4767	4.39667	12.45	16.15	11.83	5.08	3.17	4.94
Dpep2	-1.55331	3.6144	26.8187	2.23463e-07	1.29643e-05	7.88333	2.47333	8.06	8.35	7.24	2.61	2.36	2.45
Sema3c	-1.85909	3.43273	26.8116	2.24282e-07	1.29643e-05	4.06	1.17333	5.41	2.67	4.1	1.53	1.06	0.93
Slc38a4	2.67975	2.42586	26.7739	2.28711e-07	1.31603e-05	0.47	2.87667	0.58	0.16	0.67	1.86	2.01	4.76
Sh3tc2	1.92326	0.910738	26.656	2.43089e-07	1.39243e-05	0.16	0.72	0.09	0.18	0.21	0.86	0.92	0.38
Nell1	3.32412	0.95682	26.5933	2.51111e-07	1.4319e-05	0.106667	1.51333	0.21	0.11	0	1.06	2.45	1.03
Fam180a	3.34982	2.38814	26.3839	2.79862e-07	1.58869e-05	0.753333	8.2	0.9	0.8	0.56	2.59	3.27	18.74
Ucp2	2.57784	5.44207	26.3595	2.83424e-07	1.60173e-05	3.51333	21.6567	3.22	1.83	5.49	12.74	14.61	37.62
Ube2ql1	4.47933	-0.201291	26.2944	2.93144e-07	1.64929e-05	0.03	0.73	0.06	0.02	0.01	0.28	0.09	1.82
1700026J04Rik	2.11486	1.76823	26.244	3.00895e-07	1.68541e-05	0.533333	2.47	0.84	0.25	0.51	2.06	3.41	1.94
Npl	3.0742	0.306093	26.1947	3.08664e-07	1.72131e-05	0.22	2.03333	0.27	0.13	0.26	1.21	0.69	4.2
Hcn2	-2.23376	-0.0912666	26.1739	3.12016e-07	1.73237e-05	0.516667	0.09	0.54	0.3	0.71	0.06	0.05	0.16
Adam12	1.78842	0.655165	26.1517	3.15611e-07	1.74468e-05	0.0633333	0.333333	0.06	0.05	0.08	0.34	0.36	0.3
Il31ra	3.65248	1.70081	26.057	3.31478e-07	1.80954e-05	0.113333	1.97	0.12	0.04	0.18	2.61	3.07	0.23
Rgs2	1.6528	3.68602	26.0563	3.31606e-07	1.80954e-05	2.11667	7.30667	2.54	2.19	1.62	5.72	8.76	7.44
Podn	-1.78692	1.0295	26.0561	3.31633e-07	1.80954e-05	1.15	0.333333	1.12	0.94	1.39	0.41	0.34	0.25
Duoxa1	3.46473	-0.791326	25.9241	3.55106e-07	1.92931e-05	0.0433333	0.4	0.06	0.02	0.05	0.11	0.07	1.02
Cacna2d4	-2.28473	1.45	25.909	3.57906e-07	1.93621e-05	0.736667	0.12	0.57	0.84	0.8	0.18	0.05	0.13
Ablim2	2.92149	3.66712	25.8912	3.61217e-07	1.94581e-05	0.873333	6.86	0.61	0.87	1.14	2.55	3.43	14.6
Tes	1.75937	5.58834	25.8163	3.75507e-07	2.01421e-05	11.1233	38.4833	13.38	7.42	12.57	29.16	44.78	41.51
Laptm5	2.38627	2.42211	25.7914	3.8038e-07	2.03174e-05	0.513333	3.15	0.72	0.24	0.58	2.42	4.22	2.81
Grip2	-2.03134	1.97447	25.5827	4.23823e-07	2.25428e-05	1.31667	0.313333	1.89	0.64	1.42	0.33	0.31	0.3
Rnf112	-1.90506	2.00659	25.4652	4.50434e-07	2.38579e-05	2.2	0.59	2.46	1.79	2.35	0.9	0.41	0.46
Maf	3.56505	2.75467	25.3982	4.66347e-07	2.45978e-05	0.34	4.05333	0.41	0.13	0.48	2.07	1.11	8.98
Hr	-1.88768	3.51627	25.3757	4.71813e-07	2.47829e-05	3.68	1	3.45	2.84	4.75	1.5	0.66	0.84
Dok3	1.96961	0.779695	25.3663	4.7413e-07	2.48017e-05	0.436667	2.09333	0.32	0.48	0.51	0.98	2.75	2.55
Wnt9b	3.05869	3.44321	25.3404	4.80543e-07	2.50337e-05	0.613333	5.24	0.38	0.14	1.32	7.59	3.86	4.27
Slc27a3	1.87336	3.24216	25.2303	5.08764e-07	2.63953e-05	2.18667	8.09667	1.87	1.81	2.88	4.72	9.75	9.82
Notch4	-1.50648	6.3482	25.2115	5.13755e-07	2.65454e-05	20.4833	7.33667	17.99	20.98	22.48	8.14	7.55	6.32
Samsn1	4.45241	1.06192	25.1843	5.21035e-07	2.68121e-05	0.126667	2.67333	0.2	0.01	0.17	1.12	1.05	5.85
Neo1	-1.71733	2.69779	25.1747	5.23656e-07	2.68379e-05	1.50667	0.446667	1.66	1.1	1.76	0.55	0.42	0.37
Jph2	-2.21289	2.73285	25.1564	5.28647e-07	2.69844e-05	3	0.626667	3.77	1.25	3.98	0.61	0.48	0.79
Ngf	3.37522	1.15254	25.1033	5.4341e-07	2.76156e-05	0.533333	5.18667	0.81	0.32	0.47	1.6	2.28	11.68
Galntl4	2.4756	5.63228	25.0963	5.45375e-07	2.76156e-05	6.71	37.6467	6.62	4.58	8.93	20.35	22.09	70.5
Scn3a	2.12351	1.60296	25.0804	5.4989e-07	2.77333e-05	0.0966667	0.5	0.15	0.04	0.1	0.71	0.44	0.35
Tmem88	1.5522	6.46628	25.0429	5.60698e-07	2.81662e-05	21.64	88.1433	29.78	16.17	18.97	85.69	95.33	83.41
Ston2	2.24127	2.01776	24.9747	5.80861e-07	2.90637e-05	0.14	0.7	0.17	0.12	0.13	0.6	0.35	1.15
Plekha6	-1.57666	5.34709	24.9356	5.92771e-07	2.95428e-05	9.47	3.31667	8.21	10.29	9.91	4.24	3.03	2.68
Col4a6	-1.79306	3.5726	24.8729	6.12369e-07	3.03999e-05	3.10667	0.89	3.55	2.04	3.73	1.1	0.62	0.95
Wipf3	1.62406	2.95898	24.8043	6.34542e-07	3.13776e-05	1.05	3.38667	1	0.9	1.25	2.52	3.63	4.01
Scml4	1.94162	0.450054	24.7469	6.53742e-07	3.21717e-05	0.103333	0.536667	0.1	0.1	0.11	0.34	0.61	0.66
Enpp3	1.73992	4.18166	24.7412	6.55684e-07	3.21717e-05	3.44	11.8633	3.86	3.35	3.11	6.94	16.35	12.3
Nrgn	2.00274	1.52933	24.6753	6.78467e-07	3.3161e-05	0.833333	3.81333	0.63	0.5	1.37	3.06	3.48	4.9
Flt1	1.71033	6.04884	24.6667	6.81499e-07	3.31811e-05	4.96333	17.1733	4.66	4.7	5.53	15.12	24.99	11.41
Myocd	-2.07947	1.85194	24.6507	6.87187e-07	3.33299e-05	1.09667	0.253333	1.26	0.53	1.5	0.34	0.3	0.12
Arhgap22	1.73198	2.28638	24.5593	7.20565e-07	3.47555e-05	0.913333	3.17333	0.66	0.79	1.29	2.82	4.1	2.6
Gpr153	-1.55384	2.39012	24.5553	7.22071e-07	3.47555e-05	2.40333	0.826667	2.42	2.17	2.62	0.8	0.73	0.95
4933436C20Rik	2.54126	0.0886856	24.4237	7.73137e-07	3.70725e-05	0.193333	1.10333	0.28	0.12	0.18	0.27	1.6	1.44
Ankrd6	1.99519	1.08124	24.3881	7.87556e-07	3.76214e-05	0.19	0.85	0.15	0.2	0.22	0.62	0.58	1.35
Heatr8	2.03216	0.24493	24.3391	8.07846e-07	3.84456e-05	0.08	0.476667	0.12	0.08	0.04	0.36	0.45	0.62
Adcy5	-1.91039	3.75527	24.3086	8.20698e-07	3.89109e-05	4.40333	1.16333	3.41	2.72	7.08	1.27	1.25	0.97
Gm6213	1.94707	2.42213	24.2195	8.59579e-07	4.06023e-05	3.65333	15.1267	4.33	1.87	4.76	13.48	15.64	16.26
Steap4	2.17728	3.35685	24.1996	8.68518e-07	4.0753e-05	1.41333	6.74667	0.96	1.04	2.24	4.03	7.11	9.1
Clca5	2.62782	0.402345	24.198	8.69209e-07	4.0753e-05	0.0933333	0.616667	0.08	0.02	0.18	0.25	0.47	1.13
Plin4	-2.26729	4.20782	24.1893	8.73183e-07	4.07883e-05	2.82333	0.583333	3.61	1.7	3.16	0.81	0.63	0.31
Tnfaip8l1	2.18936	4.26859	24.0697	9.29102e-07	4.32408e-05	3.59333	16.7233	3.49	2.57	4.72	10.05	11.31	28.81
Adamts5	1.61265	3.55482	23.9298	9.99142e-07	4.61654e-05	0.823333	2.57667	0.88	0.57	1.02	2.34	2.47	2.92
Wscd2	-2.55115	-0.104073	23.9296	9.99236e-07	4.61654e-05	0.383333	0.06	0.31	0.21	0.63	0.08	0.02	0.08
Adcy3	-1.54917	5.08673	23.8857	1.02231e-06	4.70595e-05	12.4233	3.72667	9.94	11.47	15.86	3.82	3.5	3.86
Fxyd6	2.18539	7.28974	23.798	1.06991e-06	4.90724e-05	38.87	178.477	45.92	39.83	30.86	108.97	108.83	317.63
Cd5	3.10203	0.223642	23.5541	1.21448e-06	5.55021e-05	0.07	0.956667	0	0.04	0.17	0.57	0.24	2.06
Sorl1	-1.602	3.75365	23.5176	1.23773e-06	5.63614e-05	3.27	1.04667	3.64	2.43	3.74	1.27	0.94	0.93
Jag2	1.8948	2.85578	23.4642	1.27262e-06	5.76998e-05	0.783333	2.91333	0.66	0.58	1.11	1.55	2.98	4.21
Slc26a4	-3.07776	4.38447	23.4587	1.27624e-06	5.76998e-05	14.3533	1.73667	17.64	17.02	8.4	1.94	3.03	0.24
Scn5a	1.96222	0.145893	23.3492	1.351e-06	6.08621e-05	0.0366667	0.196667	0.03	0.02	0.06	0.28	0.09	0.22
Lcp1	1.87643	2.11458	23.2666	1.41028e-06	6.33077e-05	0.596667	2.25	0.56	0.37	0.86	2.05	3.14	1.56
Heph	-1.98629	5.29971	23.2561	1.418e-06	6.34294e-05	16.5367	4.24	22.14	17.71	9.76	6.3	4.05	2.37
Fzd7	-1.68532	3.54942	23.2377	1.43164e-06	6.38141e-05	4.32333	1.44333	4.02	3.38	5.57	1.68	1.7	0.95
Itga2	1.93225	0.573627	23.2216	1.44366e-06	6.4124e-05	0.11	0.586667	0.1	0.08	0.15	0.61	0.81	0.34
Car7	1.7974	2.7734	23.206	1.4554e-06	6.44191e-05	2.17333	8.28667	2.12	1.83	2.57	6.28	5.87	12.71
Igf2as	1.9725	1.83858	23.1771	1.4775e-06	6.51695e-05	0.03	0.0166667	0.02	0.06	0.01	0.02	0.02	0.01
Mrc2	-2.3776	2.11403	23.01	1.6116e-06	7.08377e-05	1.32333	0.246667	1.08	1.49	1.4	0.41	0.05	0.28
Spns2	1.84173	5.76386	22.998	1.62169e-06	7.10344e-05	8.60667	31.92	6.88	7.09	11.85	19.2	41.19	35.37
Xirp1	-2.26163	2.84603	22.8637	1.73908e-06	7.5914e-05	2.25	0.486667	2.79	1.06	2.9	0.84	0.29	0.33
Fam65c	2.4356	0.0314394	22.7681	1.82775e-06	7.95101e-05	0.0466667	0.586667	0.03	0.02	0.09	0.23	0.5	1.03
Lrp1	-1.86478	4.82958	22.6797	1.91375e-06	8.29662e-05	3.32333	0.913333	3.52	2.85	3.6	1.5	0.61	0.63
Rian	-1.73175	1.40431	22.6231	1.97104e-06	8.51585e-05	0.963333	0.29	0.92	0.83	1.14	0.37	0.23	0.27
Pm20d2	-1.43291	4.19783	22.5816	2.01408e-06	8.67217e-05	5.61333	2.12667	5.07	5.95	5.82	2.21	2.4	1.77
Angpt2	1.86559	4.87087	22.5456	2.05212e-06	8.80601e-05	6.25333	23.4133	7.4	4.25	7.11	12.66	29.92	27.66
Olfr1372-ps1	1.74342	0.681473	22.4978	2.1038e-06	8.99731e-05	0.466667	1.81333	0.44	0.57	0.39	2.32	1.24	1.88
Col4a5	-1.6025	5.19306	22.4349	2.17389e-06	9.26574e-05	9.41667	3.17333	8.71	6.62	12.92	3.36	2.89	3.27
Arhgap18	1.58751	2.93918	22.236	2.41107e-06	0.000102422	1.25667	3.84333	1.45	0.94	1.38	3.54	5.23	2.76
Sema3a	2.12261	3.2523	22.2214	2.4295e-06	0.00010286	0.613333	2.77	0.84	0.25	0.75	2.48	1.78	4.05
Aldh3a1	-1.59775	6.52287	22.2075	2.44719e-06	0.000103052	108.597	36.8267	106.72	96.19	122.88	49.05	24.31	37.12
Hist3h2ba	2.07447	0.0973678	22.205	2.45033e-06	0.000103052	0.943333	2.50667	1.25	0.68	0.9	1.57	4.1	1.85
Itih5	1.53171	3.69842	22.1857	2.47508e-06	0.000103748	0.963333	2.89667	1.08	0.7	1.11	2.76	2.49	3.44
Xk	-1.56561	2.21378	22.152	2.51888e-06	0.000105236	1.63667	0.556667	2.1	1.19	1.62	0.52	0.62	0.53
Ccdc141	1.6534	3.13767	22.0683	2.63118e-06	0.000109566	0.7	2.35	1	0.41	0.69	2.02	2.96	2.07
Tmc7	-1.44082	2.57493	22.0496	2.65701e-06	0.000110279	2.23	0.83	2.02	2.5	2.17	0.81	0.87	0.81
Rgs10	1.61432	1.54881	22.0255	2.69049e-06	0.000111229	2.35667	7.38333	2.42	2.55	2.1	5.98	6.54	9.63
Chst8	2.47129	0.500491	22.0205	2.69748e-06	0.000111229	0.173333	1.20333	0.23	0.23	0.06	0.5	2.3	0.81
Neil3	1.6879	1.62488	21.8134	3.00491e-06	0.000123504	0.736667	2.59333	0.75	0.62	0.84	2.1	3.72	1.96
Efna3	1.64274	1.02233	21.7789	3.05952e-06	0.000125341	0.313333	0.97	0.29	0.38	0.27	0.68	0.87	1.36
Gpr97	2.95384	4.89084	21.7534	3.10045e-06	0.000126609	3.23667	25.44	3.67	1.19	4.85	12.73	9.35	54.24
Adamtsl2	-1.56227	2.89374	21.7384	3.12479e-06	0.000127192	3.58	1.05667	3.12	4.02	3.6	1.3	1.16	0.71
Hbegf	1.3614	5.89887	21.6662	3.24466e-06	0.000131648	16.6567	44.9467	17.13	15.14	17.7	41.12	48.99	44.73
Scube1	1.63104	1.03341	21.646	3.279e-06	0.000132616	0.116667	0.44	0.14	0.1	0.11	0.4	0.57	0.35
Nkx2-3	-1.45942	4.63425	21.5193	3.50287e-06	0.000141219	19.87	7.43	19.73	19.17	20.71	5.79	7.42	9.08
Cyp1b1	-1.49912	8.99742	21.5072	3.52495e-06	0.000141658	175.343	64.2933	156.37	211.86	157.8	78.8	69.28	44.8
Vav3	1.62444	1.74796	21.468	3.59775e-06	0.000144126	0.333333	1.10667	0.35	0.31	0.34	0.96	0.85	1.51
Pard6g	3.5414	5.22514	21.4391	3.65243e-06	0.000145855	2.31	27.3633	2.8	0.36	3.77	11.27	13.46	57.36
Gpr39	1.75152	2.18831	21.4147	3.69926e-06	0.000147143	0.87	1.70667	0.69	0.69	1.23	1.56	2.48	1.08
Rasl11b	-1.52251	3.36964	21.4068	3.71456e-06	0.000147143	10.5333	3.88667	9.6	8.29	13.71	3.62	4.07	3.97
Ephx3	2.55705	0.00954428	21.399	3.72965e-06	0.000147143	0.103333	0.436667	0.02	0.04	0.25	0.19	0.2	0.92
Cyp7b1	2.38353	0.575868	21.3982	3.73118e-06	0.000147143	0.23	1.35667	0.37	0.15	0.17	1.3	2.33	0.44
Sdc2	-1.40412	7.19346	21.3776	3.7715e-06	0.000147893	77.6333	30.2467	68.59	74.16	90.15	33.96	27.05	29.73
Myh11	-1.53369	7.86999	21.3766	3.77356e-06	0.000147893	60.6667	21.4633	74.68	39.98	67.34	23.29	19.45	21.65
Mknk2	-1.4284	7.66381	21.3459	3.83439e-06	0.000149813	111.853	43.1767	97.93	96.06	141.57	43.25	45.12	41.16
Lrp5	-1.5531	4.12031	21.3113	3.9042e-06	0.000152071	5.64667	1.90333	5.04	4.77	7.13	2.39	1.99	1.33
Rad18	1.42404	3.0306	21.2284	4.07669e-06	0.000158303	1.91	5.33667	1.71	2.19	1.83	4.57	6.11	5.33
2200002D01Rik	1.50726	4.19835	21.2034	4.13022e-06	0.000159891	22.2733	67.4567	20.88	20.32	25.62	49.79	68.57	84.01
Spp1	2.44019	4.21673	21.1833	4.17381e-06	0.000161086	5.39667	30.0233	4.19	4.64	7.36	7.7	42.66	39.71
Plekho1	1.72179	4.29431	21.0914	4.37898e-06	0.000168491	8.26	28.24	7.99	5.85	10.94	19.64	26.74	38.34
Nmb	1.49474	2.30781	21.0486	4.47769e-06	0.000171767	5.53333	15.18	4.28	5.7	6.62	12.09	18.48	14.97
Fzd2	-1.84855	1.52997	21.041	4.49551e-06	0.000171929	1.46	0.38	1.94	0.78	1.66	0.47	0.27	0.4
Kcnma1	-1.7357	2.33246	21.013	4.56177e-06	0.000173938	1.66667	0.516667	1.88	0.9	2.22	0.36	0.64	0.55
Il7	2.19062	4.43134	21.0006	4.5915e-06	0.000174546	3.74667	17.1733	4.78	3.6	2.86	9.81	9.85	31.86
Fmnl2	2.07996	3.07231	20.9757	4.65142e-06	0.000176294	0.626667	2.73333	0.61	0.56	0.71	1.32	1.97	4.91
Trnp1	-1.85558	0.121862	20.8298	5.01945e-06	0.000189274	1.26333	0.363333	1.27	1.01	1.51	0.57	0.22	0.3
Susd4	3.24547	1.39887	20.8282	5.02379e-06	0.000189274	0.18	2.55	0.18	0.02	0.34	0.79	1.42	5.44
Aoc3	-1.95162	3.12529	20.7651	5.19206e-06	0.000194843	3.72667	0.99	5.24	2.31	3.63	1.54	0.52	0.91
Apba2	3.22719	1.64327	20.7613	5.20239e-06	0.000194843	0.173333	1.88	0.15	0.02	0.35	0.53	0.78	4.33
Pde3b	-1.85215	6.45112	20.7403	5.25987e-06	0.000196415	31.01	8.89	31.82	37.38	23.83	12.22	10.62	3.83
Kctd12	-1.36757	6.59276	20.5883	5.6942e-06	0.000212008	27.48	11.0533	26.41	25.26	30.77	13.06	9.75	10.35
Lrtm2	-1.50791	2.36706	20.5106	5.93012e-06	0.000220145	2.62667	0.96	2.64	2.64	2.6	1.19	1.11	0.58
S100a4	1.44706	5.79461	20.46	6.08896e-06	0.00022538	107.56	294.603	124.13	94.45	104.1	345.82	342.58	195.41
Tfpi2	1.81142	1.88081	20.4124	6.2424e-06	0.000230386	1.38333	4.92333	1.58	1.07	1.5	3.42	3.57	7.78
1190002F15Rik	1.44471	1.66903	20.3958	6.29688e-06	0.000231722	5.00333	13.7567	5.8	4.06	5.15	12.62	14.82	13.83
Ptpre	1.61293	4.16041	20.3778	6.35613e-06	0.000233224	1.67	5.41333	1.42	1.61	1.98	3.45	5.09	7.7
Ramp3	1.99742	2.03571	20.345	6.46602e-06	0.00023657	1.76	6.99333	1.65	1.98	1.65	3.65	4.8	12.53
Rcan2	-1.72123	4.85617	20.3291	6.52017e-06	0.000237864	16.0767	4.96	20.84	8.29	19.1	6.19	4.16	4.53
Gm53	-1.61954	0.933457	20.3023	6.61215e-06	0.000240526	2.24333	0.673333	1.73	2.46	2.54	0.94	1.01	0.07
Slc38a11	-1.94535	0.350537	20.2427	6.82149e-06	0.000247431	1.23333	0.226667	1.31	0.67	1.72	0.17	0.41	0.1
Sntg2	-1.37924	4.9632	20.2193	6.90539e-06	0.000249758	21.91	8.52	24.26	20.61	20.86	9.3	6.93	9.33
Igf2	1.68191	5.9574	20.2069	6.95027e-06	0.000250665	8.74	28.8933	7.79	11.29	7.14	20.63	23.14	42.91
Gchfr	2.70977	0.816327	20.1549	7.14165e-06	0.000256836	1.09333	7.58667	1.33	1.05	0.9	2.9	3.18	16.68
Pla2g4f	-1.57901	3.36977	20.1421	7.18969e-06	0.000257831	4.80667	1.65	5.05	5.76	3.61	1.85	1.95	1.15
Heyl	-1.41579	4.48543	20.105	7.33044e-06	0.000262136	8.36333	3.27	9.21	7.12	8.76	4.01	3.4	2.4
B3gnt7	2.86934	1.15339	19.9743	7.84896e-06	0.000279887	0.256667	1.82	0.26	0.29	0.22	0.66	0.7	4.1
Lyve1	2.69659	6.96716	19.9451	7.96977e-06	0.000283397	15.3367	103.1	19.82	3.13	23.06	76.33	67.24	165.73
Tslp	2.09269	2.09397	19.9286	8.03888e-06	0.000285054	1.96	8.19333	2.15	2.93	0.8	9.43	11.06	4.09
Susd5	-1.70791	5.5316	19.917	8.08799e-06	0.000285994	22.27	7.01667	25.25	12.57	28.99	8.72	5.08	7.25
Snx18	-1.3444	6.66793	19.8739	8.27206e-06	0.000291688	38.8967	15.94	35.18	36.98	44.53	16.18	18.17	13.47
Slc24a3	-1.8579	1.67055	19.8429	8.40726e-06	0.000295632	1.52333	0.416667	1.57	0.81	2.19	0.53	0.46	0.26
Lancl3	-1.89212	1.83659	19.8345	8.44439e-06	0.000296115	1.71333	0.463333	2.03	0.95	2.16	0.56	0.25	0.58
Hpse	-1.51137	5.1653	19.6951	9.08362e-06	0.000317651	21.1767	7.65667	23.26	26.28	13.99	8.89	8.46	5.62
Col6a1	-1.65989	5.1407	19.6675	9.21535e-06	0.000320505	15.6333	5.09	20.02	9.02	17.86	6.13	3.53	5.61
Grrp1	1.74412	3.82007	19.6674	9.21589e-06	0.000320505	6.50667	22.0033	7.01	5.58	6.93	10.24	27.19	28.58
Gjc2	3.7161	2.22023	19.6372	9.36268e-06	0.000324718	0.34	4.65	0.47	0.03	0.52	0.95	2.44	10.56
Srpx	-1.91342	1.13061	19.5821	9.63675e-06	0.000333311	1.67667	0.416667	2.38	1.32	1.33	0.75	0.27	0.23
Rap1gap2	-1.55177	3.55229	19.5161	9.97553e-06	0.000344088	3.06333	1.04667	2.21	3.43	3.55	1.36	1.02	0.76
Nptx1	1.62728	1.23636	19.4769	1.01825e-05	0.000350274	0.246667	0.793333	0.28	0.31	0.15	0.97	0.72	0.69
Arhgap26	1.58222	3.14013	19.4591	1.02777e-05	0.000352588	0.586667	1.79667	0.46	0.87	0.43	1.71	2.25	1.43
Slc25a33	-1.47151	3.24794	19.411	1.054e-05	0.000360609	9.24667	3.36667	9.46	8	10.28	2.56	3.21	4.33
Emid1	3.12434	2.90652	19.3226	1.10394e-05	0.000376678	0.753333	7.82	0.65	0.24	1.37	3.5	2.55	17.41
Synpo2	-1.46103	4.65876	19.3105	1.11093e-05	0.000378045	6.09333	2.24	7.47	4.72	6.09	2.94	2.12	1.66
Igfbp6	2.40761	4.06747	19.2795	1.12911e-05	0.0003832	5.45333	29.8	3.78	5.23	7.35	12.88	15.6	60.92
Gpr133	-1.75735	3.32132	19.1864	1.18558e-05	0.000401289	3.36	0.993333	3.2	4.1	2.78	1.57	0.9	0.51
Neurl3	1.51091	3.87845	19.159	1.20272e-05	0.000406006	3.44	10.0333	3	4.1	3.22	8.92	14.04	7.14
As3mt	1.46227	4.02267	19.1418	1.21356e-05	0.000408577	6.04333	17.3867	6.21	6.13	5.79	11.95	17.65	22.56
Car9	1.82564	0.104065	19.0966	1.24268e-05	0.00041727	0.193333	0.93	0.18	0.17	0.23	1.06	1.27	0.46
Kif22	1.37198	2.58985	19.0375	1.28173e-05	0.000429245	1.86	4.95667	1.84	1.6	2.14	4.16	5.88	4.83
Mmp16	-1.45253	3.50916	19.0318	1.28556e-05	0.00042939	4.1	1.51	4.14	4.39	3.77	2.08	1.42	1.03
Dtna	-1.72919	3.13028	19.0133	1.29809e-05	0.000432433	3.41	1.14	4.49	1.95	3.79	0.75	1.02	1.65
Ptprv	1.89948	0.548537	19.0044	1.30416e-05	0.000433316	0.0566667	0.323333	0.12	0.01	0.04	0.15	0.24	0.58
Sema6c	-1.8921	1.11077	18.9661	1.33061e-05	0.000440554	1.2	0.253333	1.13	1.21	1.26	0.3	0.37	0.09
Itgb5	-1.62334	7.32049	18.9583	1.33607e-05	0.000440554	88.2267	29.4067	73.42	76.08	115.18	17.27	38.86	32.09
Avpi1	1.39185	5.87805	18.9578	1.33638e-05	0.000440554	46.8067	123.877	54.43	43.57	42.42	101.56	113.29	156.78
Col6a2	-1.78327	4.44131	18.9147	1.36693e-05	0.000449454	10.4967	3.09333	11.5	5.8	14.19	4.56	2.04	2.68
Birc5	1.47544	2.56066	18.8995	1.37789e-05	0.000451882	4.12	11.7167	4.83	2.46	5.07	8.27	13.32	13.56
Ptprz1	-1.66865	4.21831	18.7564	1.48522e-05	0.000485825	3.80667	1.22333	5.16	2.67	3.59	1.31	1.69	0.67
Serpinb1c	-1.84713	2.44714	18.7454	1.4938e-05	0.000487373	4.65667	1.02333	3.51	3.73	6.73	1.12	0.39	1.56
Cmtm3	1.46022	5.47865	18.7146	1.51812e-05	0.000494032	18.48	52.1533	19.91	15.28	20.25	39.88	46.27	70.31
Cxcl5	2.00592	0.0211798	18.6359	1.58209e-05	0.00051353	0.263333	1.24667	0.32	0.19	0.28	1.64	1.62	0.48
Nid2	1.68038	3.85774	18.6308	1.58638e-05	0.000513606	1.5	5.15333	1.15	0.91	2.44	4.84	6.84	3.78
Itga8	-1.76514	7.22649	18.5667	1.64061e-05	0.000529808	46.4667	14	69.04	30.58	39.78	22.27	10.52	9.21
Tmem117	-1.55656	1.19417	18.5444	1.65994e-05	0.000534686	1.35667	0.52	1.36	1.34	1.37	0.56	0.74	0.26
Ror1	-1.50491	2.39663	18.5175	1.68355e-05	0.000540915	2.45333	0.923333	2.27	2.07	3.02	0.66	0.8	1.31
5430407P10Rik	1.53688	2.82838	18.4149	1.77667e-05	0.00056939	1.20333	3.52333	1.22	0.88	1.51	2.46	3.79	4.32
Pitpnm3	-1.29393	3.73357	18.3716	1.81745e-05	0.000580987	3.12667	1.34	2.94	3.22	3.22	1.49	1.42	1.11
Fam151a	-1.54968	3.58062	18.3092	1.87803e-05	0.000598841	0.01	0	0	0.03	0	0	0	0
Ltc4s	1.91658	-0.0858008	18.2355	1.95206e-05	0.000620882	0.79	3.07	0.89	0.48	1	1.56	2.1	5.55
Ncf2	2.39415	1.7329	18.1876	2.00175e-05	0.000635091	0.406667	2.39333	0.53	0.18	0.51	1.56	0.8	4.82
Gmfg	2.95104	1.66307	18.1652	2.0255e-05	0.000641021	0.82	7.18667	1.15	0.39	0.92	2.85	1.88	16.83
Galntl1	-2.00709	2.62468	18.1441	2.04806e-05	0.000646545	2.95667	0.696667	3.67	1.51	3.69	1.13	0.57	0.39
Pdlim4	1.3536	6.58491	18.1189	2.07527e-05	0.000653502	59.9033	155.6	64.37	52.65	62.69	123.53	144.35	198.92
F8	1.57571	5.05141	18.0787	2.11955e-05	0.000665792	2.46	7.85667	3.04	2.64	1.7	7.82	11.09	4.66
Gng2	2.60283	1.61483	18.0072	2.20067e-05	0.000689562	0.27	1.73333	0.19	0.09	0.53	0.81	1.14	3.25
5830432E09Rik	1.96842	1.30404	17.9557	2.26111e-05	0.000706751	0.0366667	0.0233333	0.06	0.05	0	0	0.07	0
Ccrn4l	1.49375	2.43833	17.9105	2.3154e-05	0.000721937	1.11333	3.23667	1.01	1.04	1.29	2.01	3.4	4.3
Eps8l2	1.39991	5.20592	17.902	2.32577e-05	0.000723388	7.49333	20.7733	6.49	8.47	7.52	15.84	28.67	17.81
Smagp	1.71205	4.38446	17.8575	2.38073e-05	0.00073867	14.3133	46.9667	13.75	13.25	15.94	25.94	42.49	72.47
Olfr1033	-1.65213	3.13681	17.8113	2.43932e-05	0.000754995	0.543333	0.21	0.64	0.5	0.49	0.43	0.2	0
Heg1	-1.39086	7.54967	17.8005	2.45315e-05	0.000757427	47.3667	17.4767	38.87	51.31	51.92	20.5	23.15	8.78
Acot11	-1.39676	5.03048	17.7838	2.4748e-05	0.000762252	9.41	3.59667	8.1	10.79	9.34	4.32	4.22	2.25
Gp1ba	-1.58603	4.1047	17.7634	2.50146e-05	0.000768592	10.4267	3.59667	12.47	11.19	7.62	5.6	2.72	2.47
Gja5	-1.50706	9.73841	17.7367	2.53681e-05	0.000774926	490.833	179.633	427.76	542.34	502.4	256.75	179.38	102.77
Wnt5b	1.60682	0.998444	17.7351	2.53904e-05	0.000774926	0.506667	1.55	0.45	0.39	0.68	1.34	1.11	2.2
Atp8a2	2.29253	2.29219	17.734	2.54044e-05	0.000774926	0.24	1.19333	0.23	0.17	0.32	0.7	0.39	2.49
Pvrl2	2.35595	5.29174	17.7025	2.58292e-05	0.000785989	7.13	37.0967	7.07	4.95	9.37	15.51	17.74	78.04
Sh3gl3	3.95261	2.39322	17.6822	2.61055e-05	0.000792494	0.503333	7.51333	0.73	0.03	0.75	2.11	1.6	18.83
Lama4	1.28441	6.10509	17.6711	2.62586e-05	0.000795235	7.46333	18.67	8.34	6.56	7.49	18.25	22.96	14.8
B3galt1	-1.48838	2.11149	17.6025	2.72236e-05	0.000822492	1.48333	0.53	1.86	1	1.59	0.5	0.69	0.4
Ubxn10	-1.39649	1.53389	17.5589	2.78543e-05	0.000838583	1.72333	0.673333	2.12	1.67	1.38	0.7	0.5	0.82
Ace	-1.54801	10.0103	17.5535	2.79341e-05	0.000838583	367.4	133.77	298.79	406.22	397.19	180.58	143.17	77.56
Dtx1	3.85121	3.69783	17.552	2.7955e-05	0.000838583	0.5	7.61	0.24	0.04	1.22	2.56	2.99	17.28
Olfm2	-1.64895	2.00081	17.4339	2.97473e-05	0.00089024	4.40667	1.50667	4.33	4.72	4.17	1.39	0.8	2.33
Ptprj	-1.45095	7.66036	17.407	3.01717e-05	0.000899848	43.3767	16.3767	40.02	51.02	39.09	21.33	18.4	9.4
Spc24	1.4364	1.93563	17.4009	3.02683e-05	0.000899848	1.70667	5.11667	1.9	1	2.22	4.12	5.29	5.94
Rbp7	3.9147	3.96073	17.4001	3.02816e-05	0.000899848	4.67667	73.6033	3.97	0.49	9.57	30.42	11.72	178.67
Btnl9	3.3909	3.47513	17.3408	3.1241e-05	0.000926181	0.883333	9.18333	1.02	0.05	1.58	3.3	4.05	20.2
Fndc1	-1.36064	7.12731	17.323	3.15347e-05	0.000932706	39.2267	15.7867	27.89	43.13	46.66	17.63	17.26	12.47
Col4a4	-1.50309	6.19501	17.272	3.23927e-05	0.000955848	13.8633	4.72333	11.34	10.45	19.8	5.56	3.17	5.44
Wnk4	-1.47347	5.05	17.26	3.2597e-05	0.000959642	12.86	4.63	12.2	14.88	11.5	6.71	4.61	2.57
Mtss1	1.27486	2.88859	17.2467	3.28265e-05	0.000964154	0.93	2.30667	1.07	0.75	0.97	2.61	2.1	2.21
Actn1	-1.23476	6.36298	17.2388	3.29632e-05	0.000965929	34.4933	15.1367	32.8	31.24	39.44	16.77	14.17	14.47
Ism1	-1.36346	3.37801	17.2229	3.32397e-05	0.000971782	6.14	2.48333	5.63	6.28	6.51	3.34	2.39	1.72
Ror2	-1.80782	1.6253	17.2098	3.34708e-05	0.000976283	1.39667	0.43	1.08	0.96	2.15	0.33	0.7	0.26
Insrr	-1.96011	0.657257	17.1676	3.42227e-05	0.000995919	0.446667	0.123333	0.36	0.57	0.41	0.21	0.05	0.11
D8Ertd82e	1.50213	2.78765	17.1445	3.46417e-05	0.00100446	0.88	2.61333	1.1	0.56	0.98	3.17	2.95	1.72
Gm7694	-1.47162	5.29753	17.1413	3.47001e-05	0.00100446	17.5933	6.67667	16.39	19.26	17.13	8.14	8.33	3.56
Sprr2a1	1.64808	3.24328	17.1332	3.48477e-05	0.00100446	0.37	1.17	0.49	0.4	0.22	1.39	1.43	0.69
Sprr2a2	1.64808	3.24328	17.1332	3.48477e-05	0.00100446	0.37	1.17	0.49	0.4	0.22	1.39	1.43	0.69
Sost	-2.18843	3.8565	17.1297	3.4913e-05	0.00100446	13.5433	3.06	7.46	6.69	26.48	2.65	2.03	4.5
Xdh	1.42173	4.28856	17.1208	3.50764e-05	0.00100688	2.60333	7.25333	2.28	2.33	3.2	4.97	10.26	6.53
Asns	2.09298	1.92687	17.1138	3.5206e-05	0.00100831	0.916667	4.06	0.86	0.26	1.63	3.09	4.54	4.55
Fam160a1	-1.37433	3.68917	17.08	3.58378e-05	0.00102409	4.39	1.76333	4.5	4.36	4.31	2.32	1.85	1.12
Cd300lg	2.85076	4.17701	17.0506	3.63962e-05	0.0010377	2.14333	15.83	1.92	0.26	4.25	9.51	9.93	28.05
Hmgb3	1.53493	4.10406	17.02	3.69878e-05	0.0010522	6.90667	20.1767	6.94	6.37	7.41	15.81	14.05	30.67
Tk1	1.5435	1.72402	16.9984	3.74107e-05	0.00106184	1.28333	4.66667	1.12	1.03	1.7	3.15	5.88	4.97
Lamc2	1.42104	1.65085	16.9308	3.87682e-05	0.00109791	0.333333	0.993333	0.28	0.23	0.49	1.1	0.77	1.11
Rassf10	1.84441	4.48531	16.9035	3.9328e-05	0.00111128	3.29	12	2.79	3.09	3.99	5.83	9.3	20.87
Npy1r	-1.75832	3.72106	16.8935	3.95377e-05	0.00111472	7.47333	2.20333	10.59	5.02	6.81	3.62	1.36	1.63
Bmpr1a	-1.42272	6.76729	16.8357	4.07603e-05	0.00114663	34.4433	13.34	39.11	38.83	25.39	17.2	14.73	8.09
Fgl2	1.39103	8.53018	16.825	4.09904e-05	0.00114816	65.6533	176.447	74.64	61.68	60.64	144.81	138.86	245.67
Zdbf2	1.92615	0.737992	16.8247	4.0996e-05	0.00114816	0.04	0.216667	0.06	0.03	0.03	0.37	0.23	0.05
Gpc4	-1.38789	4.9638	16.8098	4.13189e-05	0.00115465	23.71	9.40667	23.92	22.18	25.03	13.84	7.03	7.35
Bcmo1	-1.3404	2.04916	16.7835	4.18961e-05	0.0011682	2.65333	0.976667	2.81	2.5	2.65	0.94	0.84	1.15
Kif26a	-1.5759	4.48037	16.7486	4.26737e-05	0.00118727	5.35	1.83667	4	3.86	8.19	2.38	1.8	1.33
Twist1	-1.49379	4.65346	16.7186	4.33541e-05	0.00120355	27.8867	10.3567	18.52	29.37	35.77	7.23	10.78	13.06
Reln	2.75684	3.89389	16.7037	4.3695e-05	0.00121036	0.326667	2.46	0.33	0.02	0.63	1.52	1.12	4.74
Fgfr4	-1.3271	2.64295	16.656	4.48082e-05	0.00123849	3.24667	1.29667	3.35	2.9	3.49	1.62	1.08	1.19
Ak4	1.47267	1.36876	16.5911	4.63677e-05	0.0012788	0.323333	0.946667	0.36	0.32	0.29	0.79	1.38	0.67
Wif1	-1.53054	1.81296	16.578	4.66905e-05	0.0012849	2.71667	0.963333	4.13	1.77	2.25	1.12	0.97	0.8
Fgfr2	-1.55454	3.08169	16.5696	4.68956e-05	0.00128775	2.78	0.96	2.63	1.52	4.19	0.82	1.02	1.04
Tmem204	1.27939	6.22195	16.5427	4.75658e-05	0.00130332	30.88	77.9233	29.34	30.24	33.06	57.29	90.96	85.52
Psat1	1.30696	1.95586	16.5223	4.80804e-05	0.00131458	1.22	3.17	1.22	1.17	1.27	2.31	3.38	3.82
Fgfr1	-1.23638	7.03591	16.5086	4.84297e-05	0.00132128	43.6333	19.17	39.08	47.05	44.77	20.71	22.08	14.72
Ifi27l2b	1.2338	4.33132	16.4972	4.87211e-05	0.00132637	11.3833	27.8033	10.84	9.47	13.84	26.25	28.77	28.39
Adamts15	-1.85214	1.7908	16.4529	4.98737e-05	0.00135483	1.07	0.293333	1.24	0.59	1.38	0.41	0.35	0.12
Bmp6	-1.41806	9.29944	16.4346	5.03566e-05	0.00136373	402.677	154.187	295.73	357.21	555.09	120.66	186.19	155.71
Aurkb	1.51791	1.90699	16.4324	5.04168e-05	0.00136373	1.25667	3.52	1.13	0.84	1.8	3.01	4.45	3.1
Nsg1	2.51595	5.64439	16.419	5.07724e-05	0.00137042	7.89333	49.1267	7.36	6.02	10.3	19.45	16.33	111.6
Ctla2b	1.23008	5.06778	16.3704	5.20919e-05	0.00140305	22.31	50.9833	23.72	23.34	19.87	49.98	43.14	59.83
Ntng1	2.35099	-0.229394	16.3337	5.31124e-05	0.00142679	0.06	0.38	0.11	0.02	0.05	0.16	0.6	0.38
Kcnc4	-2.45149	-0.130437	16.3306	5.31988e-05	0.00142679	0.566667	0.1	0.79	0.29	0.62	0.22	0.02	0.06
Shroom3	-1.29912	4.9803	16.2819	5.45826e-05	0.00146081	7.35	3.14	6.06	7.27	8.72	3.16	3.89	2.37
Fgfrl1	-1.35172	6.17967	16.2763	5.47455e-05	0.00146207	48.96	19.8867	41.12	40.78	64.98	15.68	22.32	21.66
Asf1b	1.43589	1.61592	16.2455	5.56416e-05	0.00148288	1.37	3.64	1.35	1.05	1.71	2.73	3.26	4.93
Fgf13	-1.37219	2.58576	16.2308	5.60738e-05	0.00149126	4.10333	1.67667	3.83	4.3	4.18	1.6	1.22	2.21
Ephb3	-1.49444	0.577889	16.1652	5.8051e-05	0.0015406	0.56	0.2	0.37	0.57	0.74	0.2	0.15	0.25
Darc	3.73621	2.54587	16.1508	5.84928e-05	0.00154718	0.91	12.9933	0	0.25	2.48	10.81	24.39	3.78
Inpp4b	1.49853	2.24776	16.1492	5.85431e-05	0.00154718	0.543333	1.72	0.73	0.61	0.29	2.04	1.98	1.14
Stx3	1.23487	4.61614	16.1431	5.87316e-05	0.00154892	5.58667	13.3167	5.98	5.72	5.06	10.8	14.26	14.89
6330403A02Rik	-1.53871	0.792789	16.1051	5.9921e-05	0.001577	0.41	0.126667	0.51	0.34	0.38	0.15	0.06	0.17
Gdf7	-1.70398	0.936966	16.0299	6.23496e-05	0.00163752	1.19667	0.5	1.12	0.76	1.71	0.14	0.69	0.67
Sh2d3c	1.56916	5.59134	16.0066	6.31236e-05	0.00165441	8.83667	26.85	7.7	7.76	11.05	17.54	20.85	42.16
Nacad	-1.40855	2.5359	15.996	6.34764e-05	0.00166022	1.87	0.71	1.96	1.37	2.28	1.05	0.61	0.47
Atrnl1	-1.38503	5.08058	15.9471	6.51383e-05	0.00170018	8.53333	3.27667	6.51	10.22	8.87	4.58	2.96	2.29
Slit2	-1.55577	2.3534	15.9084	6.64843e-05	0.00173174	1.03667	0.346667	1.31	1.07	0.73	0.49	0.31	0.24
Gabra3	-1.37912	2.36794	15.8876	6.72184e-05	0.00174726	2.35	0.936667	2.32	1.67	3.06	1.14	0.82	0.85
Ldb2	1.43143	7.19101	15.8638	6.80668e-05	0.00176569	36.8933	103.223	49.96	38.22	22.5	113.49	123.71	72.47
Bex4	-1.25628	2.09898	15.8402	6.8921e-05	0.00178389	10.5567	4.45667	11.44	9.61	10.62	5.41	4.02	3.94
1190002N15Rik	-1.48008	6.86625	15.8367	6.90501e-05	0.00178389	54.0267	20.0933	66.27	61.55	34.26	21.6	26.6	12.08
Hoxd9	2.08493	2.37467	15.8183	6.97265e-05	0.00179452	1.16667	4.91667	1.12	1.03	1.35	1.95	3	9.8
Prrt4	-1.49919	6.13654	15.8177	6.97451e-05	0.00179452	33.75	12.3	27.34	26.84	47.07	9.62	10	17.28
Abca2	-1.24183	3.78496	15.8052	7.02097e-05	0.00180281	2.73	1.21333	2.45	2.79	2.95	1.31	1.42	0.91
Irs2	-1.60502	2.04508	15.7485	7.23436e-05	0.00185384	1.80667	0.61	1.92	0.91	2.59	0.51	0.56	0.76
Cotl1	1.51864	1.30114	15.7128	7.37253e-05	0.00188543	0.91	2.85333	0.98	0.95	0.8	2.63	4.35	1.58
Adam11	-1.43877	1.24194	15.7048	7.40366e-05	0.00188958	0.72	0.27	0.7	0.51	0.95	0.32	0.19	0.3
Nlrc3	1.96497	0.777791	15.6922	7.45293e-05	0.00189832	0.04	0.363333	0.04	0.05	0.03	0.18	0.3	0.61
Olfml3	-1.40126	2.42981	15.684	7.48532e-05	0.00190274	5.78667	2.18667	8.18	5.27	3.91	2.71	1.75	2.1
Adamts18	2.2096	-0.334065	15.6461	7.63685e-05	0.00193737	0.03	0.273333	0.04	0.02	0.03	0.21	0.53	0.08
Celsr2	-1.28954	1.9449	15.6419	7.65378e-05	0.00193778	0.536667	0.223333	0.53	0.49	0.59	0.28	0.16	0.23
Chad	-1.82324	5.30237	15.6177	7.7525e-05	0.00195886	46.7067	13.4833	27.85	61.69	50.58	6.18	12.79	21.48
Nppc	2.23125	0.824062	15.6063	7.7994e-05	0.00196679	0.59	3.71667	0.65	0.64	0.48	2.95	0.99	7.21
Vpreb1	1.82736	0.310827	15.5834	7.89452e-05	0.00198681	0.816667	3.26333	0.72	0.45	1.28	1.49	2.27	6.03
Tcf4	1.21275	6.77965	15.5651	7.97108e-05	0.00199639	9.54333	22.8267	8.95	9	10.68	18.02	25.11	25.35
S100b	-1.40972	2.81456	15.5644	7.97399e-05	0.00199639	7.75667	2.73667	7.44	9.08	6.75	2.78	1.68	3.75
Col3a1	-1.75049	8.97247	15.5631	7.97989e-05	0.00199639	157.313	48.2467	157.8	93.8	220.34	62.85	21.82	60.07
1500015O10Rik	-1.60187	7.24184	15.5575	8.00332e-05	0.00199831	361.617	121.097	310.6	295.57	478.68	129.73	61.25	172.31
Cngb1	1.32317	1.93976	15.4993	8.25344e-05	0.0020567	0.586667	1.69333	0.36	0.81	0.59	1.28	1.66	2.14
Ttc9	1.93762	5.4699	15.458	8.43596e-05	0.00209805	10.8333	42.5067	8.62	7.66	16.22	22.65	26.04	78.83
Cspg4	-1.78082	3.68107	15.4308	8.55818e-05	0.00212427	2.8	0.82	3.44	1.4	3.56	1.29	0.4	0.77
Ncam1	-1.31513	6.51486	15.4205	8.60518e-05	0.00213176	23.9867	10.0367	23.59	25.39	22.98	14.38	9.18	6.55
Veph1	-1.46181	0.507672	15.4047	8.67713e-05	0.00214539	0.383333	0.126667	0.33	0.37	0.45	0.17	0.08	0.13
Mmrn1	3.51707	8.24137	15.364	8.86631e-05	0.00218789	12.81	148.29	16.93	0.4	21.1	94.8	83.84	266.23
Spc25	1.35717	2.62056	15.3536	8.91504e-05	0.00219563	3.28667	8.48333	3.85	2.44	3.57	6.36	8.78	10.31
Trip13	1.3397	0.891396	15.3459	8.95173e-05	0.00220039	0.506667	1.35667	0.44	0.62	0.46	1.34	1.48	1.25
AW551984	1.47913	1.47571	15.3333	9.0115e-05	0.00221079	0.336667	1.07	0.38	0.35	0.28	0.82	0.71	1.68
Pappa2	2.51342	0.449741	15.3219	9.06592e-05	0.00221533	0.0366667	0.316667	0.07	0.03	0.01	0.24	0.64	0.07
Nptxr	-1.26912	3.53908	15.3207	9.07149e-05	0.00221533	0.536667	0.303333	0.57	0.32	0.72	0	0.17	0.74
Gm1673	2.25814	1.36043	15.3184	9.08252e-05	0.00221533	2.78333	12.23	2.37	1.72	4.26	5.31	5.79	25.59
Itgbl1	-1.21596	8.11968	15.2788	9.27539e-05	0.00225802	194.7	86.67	191.36	181.71	211.03	112.04	70.51	77.46
Rbm24	-1.41765	0.379377	15.2652	9.34234e-05	0.00226784	0.653333	0.25	0.82	0.47	0.67	0.25	0.22	0.28
Ebf1	1.34179	4.79431	15.2633	9.35155e-05	0.00226784	7.89667	20.8833	8.91	6.57	8.21	13.23	24.14	25.28
Slc16a5	-1.48502	1.20299	15.2549	9.39328e-05	0.0022736	0.866667	0.333333	0.93	0.94	0.73	0.28	0.17	0.55
Gpr125	-1.56245	6.85298	15.2356	9.48971e-05	0.00229256	46.03	16.22	37.07	51.51	49.51	14.57	26.2	7.89
Dcdc2a	1.47059	1.81461	15.2028	9.6558e-05	0.00232824	0.313333	0.856667	0.33	0.29	0.32	1.27	0.76	0.54
Syde2	-1.33737	2.33301	15.195	9.6959e-05	0.00233347	1.52667	0.62	1.94	1.24	1.4	0.78	0.47	0.61
Lrrc3b	-1.26732	5.65832	15.1767	9.79017e-05	0.00234978	55.94	24.28	65.8	63.29	38.73	28.21	25.63	19
Sema3d	1.49465	5.51756	15.1747	9.80082e-05	0.00234978	4.36333	12.4933	5.56	4.62	2.91	10.23	8.93	18.32
Tcf15	2.83334	1.68131	15.1387	9.98935e-05	0.00239046	1.10667	8.64667	0.71	0.11	2.5	4.32	8.01	13.61
Hmgb2	1.17899	4.74065	15.1113	0.000101355	0.00242085	6.96333	16.5	6.39	6.96	7.54	14.33	16.33	18.84
Cbs	-1.59518	0.0192507	15.0794	0.000103085	0.00245753	0.673333	0.206667	1.05	0.46	0.51	0.31	0.16	0.15
Ptprd	-1.27728	3.47883	15.0604	0.000104123	0.00247761	1.93	0.823333	2.15	1.59	2.05	1.13	0.73	0.61
Dab2	1.20133	6.73026	15.0526	0.000104556	0.00248244	16.5833	39.4733	17.55	19.25	12.95	34.32	43.65	40.45
Smad7	-1.2321	5.95028	15.0497	0.000104718	0.00248244	22.4667	9.81333	18.13	20.35	28.92	10.37	9.03	10.04
Zbtb42	-1.30756	2.77511	15.0329	0.000105653	0.00249993	3.38667	1.36	3.1	2.97	4.09	1.47	1.72	0.89
Lhfp	-1.34305	7.92873	15.0192	0.000106425	0.0025135	213.2	85.9267	200.64	165.87	273.09	90.23	61.52	106.03
Grap	1.89348	4.28412	15.004	0.000107282	0.00252902	6.23	24.1967	7.54	4.63	6.52	12.05	14.01	46.53
Clec3b	-1.97396	2.05987	14.9942	0.000107843	0.00253751	8.88333	2.09333	4.92	4.05	17.68	2.25	1.46	2.57
Slc43a1	-1.26813	4.48808	14.9688	0.000109301	0.00256705	14.1967	5.97	16.09	14.85	11.65	7.47	6.33	4.11
Slc22a4	1.33242	2.3003	14.9418	0.000110876	0.00259923	1.26333	3.39333	1.56	1.33	0.9	2.9	2.86	4.42
Mgat3	-1.29248	1.12772	14.9257	0.000111827	0.00261666	0.76	0.313333	0.79	0.64	0.85	0.32	0.37	0.25
Ncaph	1.33123	1.98608	14.9166	0.000112367	0.00262446	0.946667	2.59	1.07	0.76	1.01	1.66	3.51	2.6
Pcdhb7	1.29597	2.26645	14.8993	0.000113407	0.00264386	0.97	2.39667	0.91	1.06	0.94	1.83	3.23	2.13
Dusp5	1.60085	1.20693	14.8745	0.000114906	0.0026696	0.983333	3.03667	0.88	0.63	1.44	1.79	4.19	3.13
Prdm6	-1.50697	1.45964	14.8741	0.000114933	0.0026696	1.76333	0.633333	1.66	1.18	2.45	0.49	0.54	0.87
A4galt	1.14187	4.88109	14.8693	0.000115225	0.00267148	10.7633	24.5633	12.78	9.89	9.62	25.29	26.89	21.51
B230206H07Rik	1.31154	2.99213	14.8196	0.000118301	0.00273778	0.04	0.08	0.03	0.09	0	0.13	0.07	0.04
Nqo1	1.27086	5.48888	14.7942	0.000119901	0.00276975	20.75	50.9933	22.81	21.88	17.56	38.53	46.97	67.48
Ube2c	1.30193	2.78102	14.7775	0.000120971	0.00278939	6.23	15.3033	5.36	4.68	8.65	13.67	17.51	14.73
Tbx3	1.62597	0.00211704	14.7651	0.000121771	0.00280273	0.0866667	0.29	0.06	0.03	0.17	0.36	0.26	0.25
Pbld1	1.67444	0.591868	14.7472	0.000122929	0.00282424	0.35	1.33333	0.44	0.49	0.12	1.11	1.96	0.93
Itih4	-1.46425	4.60121	14.6659	0.000128351	0.00294346	13.6267	5.05667	20.11	8.23	12.54	6.48	5.31	3.38
Necab1	2.28178	1.18548	14.6505	0.000129403	0.00296223	0.0466667	0.146667	0.02	0.11	0.01	0.11	0.15	0.18
Klhl30	-1.50078	1.39561	14.6365	0.000130368	0.00297894	1.44333	0.53	1.62	0.87	1.84	0.75	0.45	0.39
Adm	2.19912	3.3631	14.6324	0.000130652	0.00298004	3.25667	15.3033	3.7	1.57	4.5	6.39	8.37	31.15
Gsto1	1.12809	4.96771	14.5758	0.000134633	0.00306417	23.21	51.6833	23.3	21.56	24.77	48.88	60.82	45.35
Pdpn	2.50175	2.55195	14.5731	0.000134825	0.00306417	1.23667	7.00333	1.71	0.26	1.74	5.43	2.48	13.1
Fmod	-1.63556	3.82771	14.5401	0.000137207	0.00311274	9.20667	3.04333	11.94	5.27	10.41	4.53	3.15	1.45
Chn1	1.44547	4.21307	14.5072	0.000139622	0.00316184	2.81333	7.79333	2.68	2.3	3.46	5.05	6.24	12.09
Gpr160	2.9755	1.621	14.4964	0.000140425	0.00317436	0.41	3.37333	0.64	0.07	0.52	2.16	0.72	7.24
Dlgap1	-1.3988	2.3553	14.4854	0.000141251	0.00318734	1.64667	0.55	1.67	2.05	1.22	0.7	0.38	0.57
Pcdh19	-1.27785	3.35815	14.475	0.000142028	0.00319918	1.61667	0.7	1.19	1.77	1.89	0.81	0.8	0.49
Efnb2	-1.24948	7.89311	14.4593	0.000143219	0.00322026	92.3433	40.2333	80.29	109.93	86.81	47.73	46.7	26.27
Gna14	-1.13015	3.69928	14.4129	0.000146797	0.00329486	6.11667	2.83667	5.48	6.29	6.58	3.06	2.95	2.5
Ccnb1	1.27118	3.34816	14.3916	0.000148465	0.00332242	3.19667	8.09667	3.69	2.11	3.79	7.1	8.69	8.5
Ccbp2	2.52011	3.44597	14.3905	0.00014855	0.00332242	1.39333	7.85	1.4	0.25	2.53	5.46	3.68	14.41
Fam83d	1.4471	1.59074	14.3837	0.000149086	0.00332854	0.896667	2.43	0.94	0.52	1.23	1.71	2.6	2.98
Lrrc1	1.15926	3.74794	14.3728	0.000149953	0.003342	3.36333	7.77333	2.96	3.6	3.53	6.57	8.29	8.46
Col9a1	-1.90063	1.58595	14.3692	0.000150238	0.00334248	1.27	0.293333	1.33	0.97	1.51	0.29	0.05	0.54
Klhl4	1.16421	7.30604	14.354	0.000151456	0.00336364	33.82	78.5233	36.62	39.12	25.72	70.93	83.23	81.41
Slco2b1	1.33501	5.25477	14.34	0.000152584	0.00337758	5.29333	14.0667	4.61	4.27	7	10.22	19.66	12.32
Cpxm1	-1.16345	4.11321	14.3396	0.000152617	0.00337758	11.82	5.48333	13.55	12.75	9.16	5.86	5.02	5.57
Batf	1.2936	2.12226	14.3306	0.000153352	0.00338299	3.66333	9.31667	3.89	2.98	4.12	10.57	6.17	11.21
Prkcq	2.00537	3.03812	14.3301	0.000153396	0.00338299	1.18	4.69	1	0.9	1.64	2.92	1.9	9.25
Adamts4	1.41702	1.73154	14.3255	0.000153771	0.00338536	0.466667	1.15333	0.28	0.31	0.81	1.1	1.14	1.22
Arl4a	1.594	6.99254	14.3105	0.000154995	0.0034064	20.58	63.0467	21.85	18.17	21.72	40.08	40.51	108.55
Gpc6	-1.26138	5.72542	14.2885	0.000156818	0.00343699	12.8667	5.53667	11.57	9.76	17.27	6.95	5.21	4.45
Gbx2	-1.43929	2.41566	14.2872	0.00015693	0.00343699	3.65	1.42333	3.35	3.5	4.1	1.31	0.83	2.13
Bik	1.56501	3.37391	14.2809	0.000157454	0.00344252	7.02	21.16	6.41	5.59	9.06	15.33	13.93	34.22
Pparg	2.33354	2.76732	14.2651	0.000158786	0.00346564	1.50667	7.53667	1.87	0.33	2.32	3.89	4.12	14.6
Abcb1a	1.45527	3.49735	14.2269	0.000162041	0.00353059	1.02333	3.43	1.04	1.06	0.97	3.1	5.42	1.77
Ankle1	1.48695	0.609641	14.1925	0.000165031	0.00358957	0.29	0.99	0.21	0.24	0.42	0.63	1.66	0.68
Hs3st3a1	-1.60105	1.18576	14.1695	0.000167055	0.00362736	0.96	0.293333	0.93	0.89	1.06	0.2	0.13	0.55
Eltd1	1.4473	7.28041	14.1647	0.000167482	0.00363041	23.49	66.21	26.5	26.12	17.85	67.68	98.34	32.61
Pgf	1.59173	3.45466	14.1532	0.000168514	0.0036416	4.14667	13.2867	2.97	2.56	6.91	10.62	9.8	19.44
Cldn15	-1.13729	6.89721	14.1525	0.000168574	0.0036416	113.533	53.1567	114.41	109.18	117.01	53.32	43.99	62.16
Sec14l2	-1.13097	4.25888	14.1044	0.000172936	0.00372947	11.9667	5.6	11.42	12.6	11.88	6.85	5.17	4.78
AW555464	-1.20266	3.13862	14.0904	0.000174232	0.00375103	2.06	0.933333	1.7	1.85	2.63	1	0.94	0.86
Col1a1	-1.73251	7.23235	14.067	0.000176412	0.00379152	52.52	16.4067	51.91	30.6	75.05	20.4	6.91	21.91
Lpar1	-1.32137	5.15821	14.0528	0.000177749	0.00381283	17.9033	7.28667	12.43	19.86	21.42	7.27	5.47	9.12
Nox4	-1.27178	5.31876	14.0501	0.000178006	0.00381283	18.6133	7.95667	24.64	15.4	15.8	9.48	9.06	5.33
Smoc1	-1.52719	9.02728	14.0422	0.000178756	0.00382242	268.657	97.0367	260.91	267.2	277.86	150.63	99.9	40.58
Itga9	-1.22981	7.99764	14.029	0.000180015	0.00384006	58.1167	25.6433	47.9	62.44	64.01	24.11	34.59	18.23
Abca8a	-1.6756	2.49782	14.0272	0.000180188	0.00384006	1.71	0.526667	1.98	1.99	1.16	0.62	0.79	0.17
Palm	1.39054	6.5802	14.0196	0.000180919	0.00384917	23.42	60.6367	19.91	20.35	30	40.91	54.01	86.99
Lamb1	1.39136	4.58176	13.9903	0.000183756	0.00390296	2.59667	7.15667	2.07	1.73	3.99	5.67	7.33	8.47
Aff2	-1.26965	2.3131	13.983	0.000184467	0.00391151	1.63333	0.71	1.13	1.44	2.33	0.63	0.73	0.77
Pdgfrb	-1.61948	5.97321	13.8987	0.000192929	0.00408409	20.1	6.63667	17.55	22.65	20.1	10.37	7.11	2.43
Ass1	-1.0843	6.23989	13.8191	0.000201281	0.00425379	77.8133	37.5033	80.25	81.17	72.02	42.71	36.22	33.58
Arhgap27	1.81555	3.85191	13.7789	0.000205635	0.00433856	1.87333	6.86667	1.62	1.12	2.88	3.73	4.98	11.89
D730005E14Rik	1.1625	3.63731	13.7532	0.000208468	0.00438871	1.15667	3.54667	1.09	1.42	0.96	2.55	2.98	5.11
Hopx	1.33387	1.16534	13.751	0.000208706	0.00438871	1.41333	3.60667	1.05	1.28	1.91	4.17	2.66	3.99
Hs6st1	-1.67414	4.69302	13.6965	0.000214853	0.00451049	12.6633	4.04333	6.34	9.24	22.41	2.82	4.35	4.96
Nusap1	1.16026	2.65872	13.6608	0.000218976	0.00458347	1.49	3.5	1.65	1.23	1.59	2.98	4.47	3.05
Il10ra	4.22648	0.501392	13.6602	0.000219054	0.00458347	0.0333333	0.96	0.07	0.03	0	0.37	2.51	0
Dctd	1.2896	1.33311	13.6357	0.000221927	0.00463594	0.843333	2.33333	0.61	0.83	1.09	1.74	2.49	2.77
Smpd3	-1.51623	5.97082	13.6173	0.000224107	0.00467377	20.83	7.46333	12.78	14.58	35.13	7.06	6.51	8.82
Olfml2b	-1.38783	4.52575	13.5964	0.000226623	0.00471845	13.2767	5.16	17.39	7.59	14.85	5.52	3.66	6.3
Kcnc2	2.23569	1.64614	13.5849	0.000228018	0.0047397	0.173333	0.966667	0.15	0.28	0.09	0.92	1.8	0.18
Lox	-1.19417	8.58187	13.5517	0.000232086	0.00481635	167.82	75.6667	160.27	182.32	160.87	99.09	77.44	50.47
Tbkbp1	-1.10786	4.71801	13.499	0.00023869	0.0049453	11.6267	5.45	10.44	10.66	13.78	5.48	5.61	5.26
C78339	-1.13195	3.2473	13.476	0.000241635	0.00499813	9.57333	4.72333	8.1	10.85	9.77	4.56	5.47	4.14
Vasn	-1.16726	4.32363	13.4241	0.000248413	0.00512995	10.4533	4.75667	11.26	7.68	12.42	5.42	4.47	4.38
4930486L24Rik	1.11865	2.74755	13.4088	0.000250453	0.00516366	3.22	7.51667	3.2	3.41	3.05	6.97	7.25	8.33
Rab20	1.24387	1.36124	13.3802	0.000254292	0.00523428	1.43	3.51	1.73	1.65	0.91	3.32	4.96	2.25
Aass	-1.77517	2.80281	13.3726	0.000255333	0.00524717	3.34	1.02333	3.48	4.19	2.35	1.65	1.13	0.29
Plekhg3	-1.21132	3.62686	13.3657	0.000256264	0.00525778	3.74667	1.69	3.7	3.1	4.44	1.75	2.18	1.14
Pdgfc	1.40719	3.92517	13.3569	0.000257477	0.00526826	2.92667	8.03	3.78	2.33	2.67	8.66	11.36	4.07
Tspan8	1.14948	2.22975	13.3559	0.000257607	0.00526826	2.48667	5.54333	2.51	2.44	2.51	6.34	4.55	5.74
Sox4	1.58643	3.22527	13.347	0.000258842	0.00528496	1.67667	5.39333	1.56	1.5	1.97	2.02	6.03	8.13
4732416N19Rik	-1.34881	2.68036	13.2836	0.000267737	0.00545777	0.116667	0.04	0.15	0.2	0	0.12	0	0
Cerk	-1.11467	5.12545	13.2486	0.000272777	0.00553728	12.21	5.72333	10.35	11.26	15.02	6.15	6.03	4.99
Aqp1	1.35968	7.84966	13.2476	0.000272924	0.00553728	57.5167	152.823	36.19	49.69	86.67	158.54	125.08	174.85
Cdk1	1.46311	2.86316	13.2475	0.000272949	0.00553728	1.59667	4.45333	1.24	1.03	2.52	2.72	5.99	4.65
Gna15	-1.22978	2.33452	13.2443	0.000273414	0.00553784	4.29333	1.84	4.04	4.4	4.44	1.51	1.56	2.45
Gm11837	2.60519	1.30644	13.2405	0.000273963	0.00554009	1.05	6.50333	1.48	0.63	1.04	1.04	2.61	15.86
Bmp2k	1.32999	3.45054	13.2222	0.000276646	0.00558542	0.913333	2.64333	0.7	0.69	1.35	2.44	3.73	1.76
Chac2	1.12124	3.50963	13.2152	0.000277693	0.00558713	7.28	16.3333	7.23	8.29	6.32	14.59	15.34	19.07
Ccl21a	3.65567	9.94129	13.2127	0.000278054	0.00558713	2.90667	0.0633333	0	2.77	5.95	0	0	0.19
Gm1987	3.65567	9.94129	13.2127	0.000278054	0.00558713	99.5	1307.63	119.53	0	178.97	718.19	349.5	2855.19
Ccdc48	2.24559	1.62554	13.1762	0.000283531	0.00567854	0.416667	2.00333	0.39	0.21	0.65	0.72	0.8	4.49
Frmd5	-1.53547	3.86328	13.1745	0.000283792	0.00567854	5.15667	1.82	6.13	5.72	3.62	2.69	2.06	0.71
Nat8l	1.93264	0.31593	13.1734	0.00028395	0.00567854	0.0866667	0.346667	0.12	0.09	0.05	0.16	0.19	0.69
Ifi204	1.49907	2.94843	13.1595	0.000286072	0.00570937	0.736667	3.11	0.6	0.95	0.66	2.07	6.09	1.17
Anxa8	2.0231	0.993309	13.1546	0.000286814	0.00570937	0.383333	2.14	0.32	0.13	0.7	0.95	1.03	4.44
Gadd45g	1.1541	6.76893	13.1544	0.000286844	0.00570937	77.6367	179.9	70.43	75.54	86.94	150.58	157.48	231.64
7530420F21Rik	1.80149	-0.326807	13.142	0.000288748	0.00573824	0.15	0.546667	0.16	0.29	0	0.47	1.07	0.1
Leprel2	-1.12932	7.54573	13.1363	0.000289628	0.0057467	110.757	51.93	99.16	102.21	130.9	42.18	62.45	51.16
Mt2	1.24191	4.60396	13.1331	0.000290122	0.00574751	44.5067	107.083	33.72	44	55.8	84.22	99.51	137.52
Mir1906-1	-1.10009	2.71208	13.1239	0.000291547	0.0057577	17.9	17.8067	24.27	25.28	4.15	18.29	19.34	15.79
Mir1906-2	-1.10009	2.71208	13.1239	0.000291547	0.0057577	17.9	17.8067	24.27	25.28	4.15	18.29	19.34	15.79
Nrxn2	2.18068	1.82934	13.1166	0.000292697	0.00576512	0.15	0.613333	0.14	0.19	0.12	0.16	0.32	1.36
Mst1r	-1.49159	1.12006	13.1157	0.000292833	0.00576512	0.726667	0.213333	0.66	0.86	0.66	0.34	0.1	0.2
Slc45a3	2.45518	5.75075	13.108	0.000294036	0.00577981	6.02	34.02	3.75	3.47	10.84	12.15	12.49	77.42
Fbln1	-1.07605	3.76425	13.0703	0.000300018	0.00588826	6.17667	2.99333	6.3	5.81	6.42	3.47	2.79	2.72
Cd1d1	1.32276	1.98944	13.067	0.000300549	0.00588954	1.50333	3.84667	1.76	1.77	0.98	3.47	2.74	5.33
Nme4	1.27013	0.596589	13.0495	0.000303361	0.00593547	1.07333	2.59333	0.84	1.38	1	2.86	2.19	2.73
Scube3	-1.60773	1.84997	13.0332	0.000306021	0.00597826	1.94	0.633333	2.39	0.84	2.59	0.58	0.43	0.89
Cdca3	1.2136	1.73438	12.9703	0.000316472	0.00617291	1.71667	3.95333	1.83	1.29	2.03	3.75	4.84	3.27
Slc26a10	2.12041	0.320132	12.9598	0.000318248	0.00619801	0.14	0.803333	0.07	0	0.35	0.7	0.32	1.39
Cyp26b1	1.30449	2.46584	12.9564	0.00031883	0.00619979	0.773333	1.97667	0.82	0.85	0.65	1.36	3.01	1.56
Slc43a2	1.11827	3.03562	12.9383	0.00032192	0.00624961	0.736667	1.71667	0.8	0.86	0.55	1.97	1.65	1.53
Cthrc1	1.18495	5.6429	12.9331	0.000322823	0.00624961	34.55	80.2167	32.91	30.56	40.18	76.25	60.16	104.24
Kcnab1	-1.34941	4.48024	12.9328	0.000322873	0.00624961	12.8067	5.13667	18.96	7.59	11.87	6.65	4.36	4.4
Gm14207	1.24203	1.71824	12.9183	0.000325388	0.00628869	0.73	3.24333	0.43	0.99	0.77	3.18	1.63	4.92
Rapgef4	1.17063	2.74518	12.9013	0.000328358	0.00633642	0.533333	1.53667	0.78	0.43	0.39	1.57	1.95	1.09
Mast3	-1.12751	2.79133	12.8936	0.000329701	0.00635264	1.96333	0.96	1.86	1.93	2.1	1.2	0.8	0.88
Col1a2	-1.28201	8.36701	12.8562	0.000336361	0.00647111	101.67	43.21	99.54	67.44	138.03	53.7	31.97	43.96
Cklf	1.40016	2.89421	12.8011	0.000346409	0.0066543	9.01	22.55	9.03	8.53	9.47	19.26	14.35	34.04
Cercam	-1.14714	4.15698	12.7894	0.000348585	0.00668596	10.6867	4.98	10.9	10.18	10.98	6.61	4.86	3.47
Cdc42ep2	1.08909	3.72102	12.7858	0.000349266	0.00668889	7.29333	16.4733	6.92	7.69	7.27	17.54	19.31	12.57
Chrdl1	-1.60543	1.55933	12.7816	0.000350038	0.00669106	1.25	0.42	1.1	1.16	1.49	0.29	0.82	0.15
Mrvi1	-1.7115	3.12531	12.7795	0.000350436	0.00669106	2.66	0.82	3.9	1.82	2.26	1.54	0.56	0.36
Ier5l	1.91805	1.09149	12.7603	0.000354059	0.00675004	0.616667	2.43	0.61	0.65	0.59	0.61	1.41	5.27
Clip4	-1.64588	0.49793	12.7434	0.000357274	0.00678473	0.666667	0.25	0.5	0.45	1.05	0.06	0.22	0.47
Ccl21b	3.63705	10.3666	12.7402	0.000357872	0.00678473	0.346667	0	0	1.04	0	0	0	0
E030013I19Rik	-1.53905	4.51149	12.7369	0.000358514	0.00678473	9.9	3.58	13.49	5.03	11.18	3.59	1.78	5.37
Ccl21c	3.63645	10.3672	12.7339	0.000359094	0.00678473	13.7	168.607	16.71	0	24.39	90.56	33.36	381.9
Gm10591	3.63645	10.3672	12.7339	0.000359094	0.00678473	13.7	168.607	16.71	0	24.39	90.56	33.36	381.9
Gm13304	3.63645	10.3672	12.7339	0.000359094	0.00678473	13.7	168.607	16.71	0	24.39	90.56	33.36	381.9
Trpc3	2.23826	0.879162	12.7297	0.000359899	0.00678981	0.186667	0.913333	0.23	0.04	0.29	0.24	0.9	1.6
Dok2	-1.26713	0.733361	12.722	0.000361382	0.00680764	1.51667	0.666667	1.55	1.37	1.63	0.94	0.55	0.51
Selenbp2	-1.04729	4.40792	12.7185	0.000362054	0.00681016	0.08	0.0266667	0.09	0.06	0.09	0.03	0.03	0.02
Unc5a	1.51755	0.710149	12.7136	0.000362999	0.00681226	0.193333	0.676667	0.21	0.26	0.11	0.5	1.04	0.49
Axl	-1.09476	5.60291	12.71	0.000363699	0.00681226	15.2533	7.39667	17.46	11.41	16.89	7.96	7.24	6.99
Baiap2	1.23411	4.30149	12.7096	0.000363779	0.00681226	6.51667	15.8167	5.42	5.32	8.81	12.13	20.72	14.6
Pik3r6	1.21708	3.41411	12.6934	0.000366946	0.0068614	2.09667	5.15	1.59	1.7	3	3.78	6.6	5.07
Itga7	-1.74676	3.736	12.6782	0.000369941	0.0069072	5.60333	1.60333	5.81	2.32	8.68	1.47	0.82	2.52
C330027C09Rik	1.16267	1.8089	12.6554	0.000374492	0.00697689	0.613333	1.47333	0.57	0.5	0.77	1.26	1.78	1.38
Fn1	-1.17133	9.39166	12.6539	0.000374776	0.00697689	125.25	58.4233	106.31	130.23	139.21	72.95	63.7	38.62
Sema3f	-1.17054	7.99929	12.6288	0.000379851	0.00706099	122.373	55.3333	92.54	111.04	163.54	49.3	57.21	59.49
1520402A15Rik	1.11226	3.57545	12.6212	0.000381405	0.00707948	6.48667	14.81	6.87	7.27	5.32	13.17	13.7	17.56
Cdca5	1.49282	0.347325	12.5972	0.000386325	0.0071603	0.433333	1.24333	0.34	0.27	0.69	1.01	1.79	0.93
Retnla	-5.2615	-0.280562	12.5561	0.000394921	0.00730892	5.04333	0.126667	15.13	0	0	0	0.16	0.22
Etv1	-1.46311	0.852278	12.5507	0.000396059	0.00730961	0.73	0.28	0.97	0.61	0.61	0.46	0.16	0.22
Ccdc60	-1.28232	0.411117	12.5504	0.000396113	0.00730961	0.75	0.26	0.74	0.57	0.94	0.25	0.17	0.36
Ldb3	-1.36578	2.98793	12.5434	0.000397607	0.00732651	3.38667	1.38	4.49	1.79	3.88	2.04	0.64	1.46
Fat1	-1.4805	3.41518	12.5341	0.0003996	0.00735252	1.13667	0.416667	1.13	0.62	1.66	0.52	0.25	0.48
Perp	-1.08327	7.32493	12.5256	0.000401413	0.00737516	149.29	72.53	172.76	161.27	113.84	80.64	64.04	72.91
Cys1	-1.09272	2.45488	12.5148	0.000403742	0.00740036	2.25	1.01333	2.24	2.51	2	0.96	0.96	1.12
Gm5424	-1.04269	4.75507	12.5138	0.000403953	0.00740036	3.09	1.56333	3.39	3.14	2.74	2.1	1.13	1.46
Nipal4	1.31142	0.682765	12.4735	0.00041277	0.00754459	0.286667	0.82	0.22	0.39	0.25	0.53	0.91	1.02
B930003M22Rik	1.24164	0.965129	12.4724	0.000413019	0.00754459	1.26	2.99667	1.25	1.43	1.1	2.25	3.66	3.08
Sirpa	-1.08037	6.63601	12.4614	0.000415451	0.00757809	43.8867	21.79	37.82	41.02	52.82	24.35	22.44	18.58
Baz1a	1.1269	2.66385	12.4547	0.000416939	0.00759428	0.67	1.60333	0.59	0.6	0.82	1.23	1.7	1.88
Alox12	1.30863	0.987494	12.4072	0.000427685	0.00777882	0.41	1.07667	0.35	0.24	0.64	1.11	0.89	1.23
Zfp651	-1.11133	3.10472	12.4033	0.00042858	0.00778393	2.07	1.00667	1.96	1.67	2.58	1.15	0.93	0.94
Tspyl5	-1.32652	2.30958	12.3984	0.000429709	0.00779324	2.12333	0.883333	2.01	2.12	2.24	0.85	1.35	0.45
Ube2t	1.21187	1.41589	12.3765	0.00043478	0.00787393	1.89333	4.53333	2	1.29	2.39	3.81	4.05	5.74
Scara5	-1.32095	2.60397	12.372	0.000435821	0.00788152	2.78667	1.12667	3.38	2.74	2.24	1.4	0.61	1.37
Rftn1	1.28253	5.02629	12.3546	0.000439893	0.00794381	7.99333	20.1933	10.48	6.14	7.36	14.88	17.23	28.47
Gm2058	-1.04966	7.09354	12.3408	0.000443168	0.00799154	14.9867	4.15	14.13	20.05	10.78	3.97	3.42	5.06
2210408F21Rik	1.08867	2.50869	12.3109	0.000450311	0.00810879	5.34333	11.28	6.06	4.78	5.19	10.86	8.73	14.25
AA467197	1.46616	0.283013	12.3055	0.000451617	0.00812076	1.34333	3.91	1.03	1.11	1.89	3.88	2.37	5.48
Synpo	-1.07736	7.92336	12.2899	0.000455414	0.00817742	76.4733	37.46	62.05	75.6	91.77	38.49	41.92	31.97
Cep55	1.43041	2.05796	12.2757	0.000458898	0.00822549	1.04667	2.92333	1.02	0.81	1.31	2.74	4.74	1.29
Il2rg	1.0842	7.52989	12.2737	0.00045939	0.00822549	94.6867	205.243	94.96	98.61	90.49	160.21	209.29	246.23
Slc16a3	-1.09816	3.35888	12.2528	0.000464564	0.00830638	6.56	3.12333	5.36	6.35	7.97	2.74	2.92	3.71
Nalcn	-1.2838	3.34989	12.2495	0.000465371	0.00830906	2.23667	0.95	2.33	2.78	1.6	1.33	0.92	0.6
Cdh26	-1.34031	4.28952	12.234	0.000469262	0.00836674	10.35	4.14	7.79	9.13	14.13	3.09	3.1	6.23
Kcnb1	1.55828	1.97019	12.2227	0.000472126	0.00840597	0.623333	1.91333	0.41	0.51	0.95	1.27	3.29	1.18
Slc16a11	1.21904	1.02868	12.2008	0.000477691	0.0084931	0.483333	1.36667	0.49	0.42	0.54	0.89	1.58	1.63
Selenbp1	-1.01422	6.18712	12.195	0.000479165	0.00850736	60.8533	30.79	63.68	64.67	54.21	32.94	32.6	26.83
Irf5	1.16533	0.561385	12.1795	0.00048317	0.00856645	0.43	1.16	0.36	0.45	0.48	1.01	1.22	1.25
Nhedc2	1.59146	-0.0710075	12.1624	0.000487623	0.00863332	0.133333	0.653333	0.12	0.25	0.03	0.3	0.51	1.15
Ptprs	-1.07349	4.17266	12.1515	0.000490482	0.00867181	3.95667	1.86	3.85	3.79	4.23	1.98	1.42	2.18
Hist1h2bf	1.16175	3.10852	12.1322	0.000495585	0.00873122	0.143333	16.0867	0	0.43	0	7.53	22.14	18.59
Rgs4	-1.30082	4.34853	12.1321	0.0004956	0.00873122	12.43	5.09	16.16	7.72	13.41	4.53	3.98	6.76
Hey1	1.07726	3.43853	12.131	0.000495912	0.00873122	3.89333	8.54	3.61	3.7	4.37	6.91	9.87	8.84
Spon2	-1.62046	0.111095	12.0974	0.000504918	0.00887744	0.836667	0.256667	0.5	0.54	1.47	0.14	0.42	0.21
St5	-1.17513	4.75716	12.0823	0.00050904	0.0089375	12.6	5.55667	15.89	7.67	14.24	6.31	3.97	6.39
Fst	1.28413	1.1405	12.074	0.000511301	0.00896477	0.59	1.61667	0.71	0.34	0.72	1.75	1.67	1.43
Sulf2	-1.10153	8.88161	12.0502	0.00051787	0.00906192	162.917	78.4567	145.79	184.41	158.55	81.19	99.53	54.65
Mboat1	1.48128	3.10702	12.0487	0.000518274	0.00906192	1.83333	5.12333	1.79	1.32	2.39	3.36	3.25	8.76
Igsf9	-1.88084	0.84126	12.0328	0.000522726	0.00912716	0.693333	0.173333	0.58	0.17	1.33	0.24	0.09	0.19
Epha3	-1.23053	2.72169	11.9858	0.00053608	0.00932654	2.44333	1.05667	3.16	2.2	1.97	1.04	1.45	0.68
Ccnb2	1.18724	2.89225	11.9855	0.000536164	0.00932654	3.78667	8.72	4.11	2.6	4.65	6.57	11.48	8.11
Rcan1	1.05348	7.47511	11.9848	0.000536355	0.00932654	64.9467	138.477	57.31	65.74	71.79	124.79	128.06	162.58
Fbrsl1	-1.12399	4.06075	11.9734	0.000539642	0.00936069	5.56667	2.61333	4.92	4.75	7.03	2.1	2.65	3.09
Cda	1.11823	3.8078	11.9729	0.000539798	0.00936069	15.4033	34.2467	15.22	16.54	14.45	35.85	24.79	42.1
Nos1ap	-1.25896	4.00718	11.9594	0.000543717	0.00940513	8.79667	3.82667	9.07	9.54	7.78	4.38	5.06	2.04
Mapk11	1.06945	3.58634	11.959	0.000543846	0.00940513	3.65333	7.65667	3.42	3.66	3.88	6.46	9.88	6.63
Slc2a4	-1.30221	0.625663	11.9468	0.000547413	0.00945389	0.91	0.363333	1.14	0.74	0.85	0.5	0.24	0.35
Cdca8	1.3323	2.06914	11.921	0.000555047	0.00957266	1.80667	4.62	1.47	1.12	2.83	3.09	6.16	4.61
Serp2	1.38283	1.02503	11.9118	0.000557803	0.00960712	1.50333	4.70333	1.09	1.76	1.66	2.85	4.61	6.65
LOC329427	1.27924	2.25655	11.9068	0.000559296	0.00961973	0.123333	0.393333	0.14	0.23	0	0.91	0.22	0.05
Emcn	1.05028	8.29484	11.8716	0.000569952	0.00978972	184.56	392.263	167.21	164.79	221.68	350.93	454.41	371.45
Psma8	-1.04599	2.32724	11.856	0.000574769	0.00985908	4.42667	2.30667	4.56	4.65	4.07	2.44	2.2	2.28
Ifitm3	1.10387	10.2795	11.8493	0.000576839	0.00988119	2054.02	4441.92	2125.62	2238.43	1798	4164.75	3459.1	5701.92
Gprc5b	1.18054	1.80872	11.8398	0.000579787	0.00991828	0.42	1.63	0.47	0.35	0.44	1.42	1.07	2.4
Hspb7	-1.37662	3.92768	11.8274	0.000583654	0.00997094	9.29	3.65	11.75	4.64	11.48	4.5	2.61	3.84
Ckap2l	1.21757	2.75953	11.7335	0.000613863	0.0104729	1.51	3.77	1.67	1.4	1.46	3.31	5.68	2.32
Flrt1	-1.1507	1.11961	11.726	0.000616327	0.0104935	0.403333	0.16	0.42	0.31	0.48	0.2	0.19	0.09
Rasl12	-1.4548	4.84613	11.7248	0.000616726	0.0104935	21.6767	8.05667	27.45	10.82	26.76	7.97	4.89	11.31
Vegfa	-1.06902	7.08456	11.681	0.000631413	0.0107199	65.7967	32.6867	74.24	67.92	55.23	41.54	32.77	23.75
Adrbk2	-1.29914	1.99799	11.6801	0.000631731	0.0107199	1.42333	0.783333	1.45	1.55	1.27	1.04	0.65	0.66
Plaur	1.24508	6.81829	11.6698	0.000635218	0.0107647	54.04	131.813	49.76	50.76	61.6	87.7	111.27	196.47
Hdac9	-1.1474	2.38785	11.6644	0.000637063	0.0107681	1.84333	0.823333	2.22	1.69	1.62	1.11	0.7	0.66
Tpst2	1.26823	6.6687	11.6643	0.000637121	0.0107681	40.0767	98.1867	41.06	34.72	44.45	58.03	95.85	140.68
Pafah1b3	1.26191	0.957313	11.6606	0.000638393	0.0107752	1.55667	3.91	2.21	1	1.46	4.3	2.6	4.83
Smc2	1.02279	4.34776	11.6536	0.000640774	0.010801	2.72333	5.71	2.79	2.78	2.6	4.76	6.35	6.02
Slc4a4	-1.24989	5.56154	11.6395	0.000645649	0.0108679	9.94	4.29667	8.93	10.62	10.27	4.8	5.83	2.26
Pi15	-1.34663	3.64824	11.6372	0.00064646	0.0108679	2.97333	1.19	3.85	1.79	3.28	1.75	1.12	0.7
Ckap2	1.29175	2.05925	11.6137	0.000654665	0.0109913	1.12333	2.75667	1.53	0.8	1.04	2.98	3.66	1.63
Tead3	-1.29379	0.796901	11.607	0.000657054	0.0110167	1.1	0.47	1.23	0.8	1.27	0.58	0.56	0.27
Spon1	-1.33699	9.5665	11.5936	0.000661807	0.0110818	204.103	84.1767	219.36	235.45	157.5	134.83	73.42	44.28
Thbs2	-1.17963	3.53693	11.5867	0.000664265	0.0111082	3.19333	1.43	3.32	3.26	3	2.1	1.23	0.96
Ltbp2	1.62194	4.95128	11.5444	0.000679526	0.0113484	2.45	8.2	3.02	1.47	2.86	8.53	13.34	2.73
Matn2	-1.21603	3.05685	11.526	0.000686295	0.0114464	3.69	1.58667	4.24	2.61	4.22	1.63	1	2.13
Tmtc1	-1.07353	7.20104	11.5105	0.000692028	0.0115268	27.5933	13.55	24.64	32.2	25.94	14.45	16.5	9.7
Vgll3	-1.24134	2.6761	11.494	0.00069822	0.0116147	3.11	1.34	2.67	2.95	3.71	0.96	1.12	1.94
Has3	1.24469	0.420879	11.4811	0.000703058	0.0116798	0.136667	0.356667	0.14	0.17	0.1	0.38	0.49	0.2
Adamts2	-1.44126	4.2401	11.4622	0.000710244	0.0117837	8.38	3.06333	7.64	5.12	12.38	2.1	2.07	5.02
Sik1	-1.15012	3.90564	11.4475	0.000715905	0.0118621	4.7	2.05667	3.65	4.55	5.9	2.72	2.11	1.34
Gm11149	-1.3124	3.68657	11.443	0.000717649	0.0118755	0.07	0	0.07	0.05	0.09	0	0	0
Cfb	1.05919	6.64603	11.42	0.000726575	0.0120075	27.9633	61.3633	28.85	28.48	26.56	46.4	79.86	57.83
Dleu7	4.3451	-1.00821	11.4034	0.000733089	0.0120993	0.00666667	0.85	0	0.02	0	0	0	2.55
Fstl1	-1.0194	10.1997	11.3812	0.000741915	0.0122186	525.83	267.98	461.95	479.96	635.58	295.94	254.03	253.97
Mpp3	1.75748	0.423562	11.3804	0.000742248	0.0122186	0.156667	0.77	0.15	0.25	0.07	0.64	0.32	1.35
Ces2c	1.60275	1.37021	11.3665	0.000747788	0.0122938	0.246667	1.59	0.29	0.38	0.07	1.64	2.48	0.65
Cenpe	1.05505	2.53378	11.334	0.000761003	0.0124949	0.456667	1.04667	0.49	0.41	0.47	1.08	1.19	0.87
Meg3	-1.00504	5.43212	11.3246	0.000764855	0.0125418	21.32	11.5	20	24.05	19.91	10.19	11.12	13.19
Hs3st3b1	-1.11004	1.21631	11.3026	0.000773995	0.0126753	0.586667	0.273333	0.66	0.55	0.55	0.35	0.26	0.21
Tppp3	1.58843	7.08125	11.2865	0.00078074	0.0127692	93.12	281.557	105	74.19	100.17	141.11	169.54	534.02
Dmpk	-1.36888	4.93667	11.2829	0.000782227	0.012777	18.77	7.38	22.6	9.81	23.9	6.1	5.52	10.52
Pcsk6	2.52723	2.38158	11.2777	0.000784419	0.0127963	0.403333	2.40667	0.37	0.12	0.72	0.91	0.55	5.76
Ogn	-1.39799	6.50391	11.2442	0.000798725	0.0130129	63.6	24.4933	96.73	33.19	60.88	30.06	15.07	28.35
Gng11	1.41407	7.19338	11.2412	0.000800001	0.013017	134.023	369.333	134.27	119.13	148.67	238.65	229.12	640.23
Ppp1r3c	1.19877	0.709409	11.2373	0.000801682	0.0130276	0.456667	1.03667	0.62	0.4	0.35	1.14	0.8	1.17
Shcbp1	1.49401	1.35092	11.2262	0.000806506	0.0130892	0.696667	1.97333	0.93	0.44	0.72	2.31	2.75	0.86
Arhgef17	-1.04446	3.30815	11.193	0.000821059	0.0133083	1.47	0.716667	1.67	1.31	1.43	0.84	0.7	0.61
Fam46a	-0.997191	3.53918	11.1565	0.000837394	0.0135557	3.32667	1.70667	3.48	3.03	3.47	1.62	1.57	1.93
AI115009	1.90916	-0.303983	11.1465	0.000841916	0.0136115	0.13	0.623333	0.15	0.2	0.04	0.44	1.29	0.14
Psen2	1.06488	6.14347	11.1377	0.00084592	0.0136588	27.4967	59.1033	31.45	23.83	27.21	70.55	43.42	63.34
Nrip2	1.2902	0.576453	11.1311	0.000848937	0.0136901	0.276667	1.09667	0.3	0.22	0.31	0.49	1.2	1.6
Ttk	1.36318	1.09832	11.1194	0.000854308	0.0137591	0.4	1.22	0.46	0.37	0.37	0.89	2.04	0.73
B4galt6	1.21931	1.82685	11.0613	0.000881506	0.0141791	0.42	1.02	0.46	0.3	0.5	1.09	1.35	0.62
Tifa	1.20195	3.84227	11.0294	0.000896778	0.0144065	5.19333	12.0967	4.53	6.04	5.01	7.43	12.01	16.85
Tlcd2	1.02051	3.46688	11.0192	0.000901729	0.0144677	3.94	9.02333	4.48	3.48	3.86	6.61	10.13	10.33
Pla2r1	1.44909	0.903719	11.0103	0.000906079	0.0145191	0.136667	0.476667	0.21	0.11	0.09	0.38	0.74	0.31
Lypd6	2.16322	-0.048058	10.9999	0.000911181	0.0145824	0.0933333	0.54	0.1	0.12	0.06	0.32	0.09	1.21
Foxf2	1.24224	2.83812	10.9793	0.000921344	0.0147264	2.15333	5.20333	1.81	1.87	2.78	3.19	7.23	5.19
Col23a1	-1.15579	6.34013	10.9583	0.000931864	0.0148758	21.9467	10.1	15.22	19.35	31.27	8.67	10.85	10.78
Myo1b	1.31018	2.78934	10.9544	0.000933822	0.0148882	0.39	1.6	0.39	0.08	0.7	1.31	0.84	2.65
Mrc1	1.29999	1.07975	10.9382	0.000942014	0.0149984	0.16	0.48	0.35	0.03	0.1	0.55	0.35	0.54
Sh2b2	1.98841	0.145233	10.9347	0.000943801	0.0149984	0.163333	0.696667	0.11	0.19	0.19	0.21	0.24	1.64
Cnrip1	1.10028	3.23169	10.9337	0.000944286	0.0149984	4.88	10.53	6.45	3.97	4.22	9.85	8.37	13.37
Ttyh3	-1.01888	3.40102	10.9312	0.000945607	0.0150005	3.37333	1.69667	2.89	3.17	4.06	1.98	1.65	1.46
Gpha2	-1.40114	1.42494	10.9221	0.000950231	0.015055	9.93333	3.68	10.13	12.94	6.73	2.94	2.01	6.09
Egfl8	1.05999	2.15502	10.9076	0.000957699	0.0151544	1.70667	5.30333	1.85	1.91	1.36	3.56	5.27	7.08
Gucy1a3	1.13394	5.68496	10.8974	0.000962989	0.0152191	8.31	18.6167	12.1	5.44	7.39	17.26	21.32	17.27
Egfr	-1.29966	1.35468	10.8706	0.000977054	0.0154124	0.936667	0.503333	1.12	0.71	0.98	0.7	0.45	0.36
D030025P21Rik	1.54951	1.11841	10.8694	0.000977657	0.0154124	0.0866667	0.146667	0.08	0.09	0.09	0.14	0.23	0.07
Cks2	1.08786	2.99827	10.8659	0.000979519	0.0154225	11.7533	26.67	14.25	7.51	13.5	26.53	30.02	23.46
Meis1	-1.20328	3.92175	10.8557	0.000984929	0.0154885	6.93667	3.13667	7.07	7.65	6.09	4.08	3.71	1.62
Itih3	1.49123	1.26581	10.8312	0.000998043	0.0156611	0.403333	1.39	0.49	0.28	0.44	1.48	2.15	0.54
Ssh3	-1.07134	1.68258	10.8306	0.000998384	0.0156611	1.78	0.726667	1.66	1.74	1.94	0.86	0.52	0.8
Cdca2	1.25183	0.724018	10.8257	0.00100102	0.0156762	0.283333	0.693333	0.36	0.21	0.28	0.49	1.08	0.51
Arhgef25	-1.00267	3.90233	10.8242	0.00100182	0.0156762	9.74333	4.94	10.33	7.54	11.36	4.62	5.52	4.68
Cdc20	1.04716	3.76376	10.8214	0.00100335	0.0156808	6.06667	13.0633	5.82	5.09	7.29	11.94	16.01	11.24
Adrbk1	-1.14847	5.19541	10.8143	0.00100717	0.015721	17.4467	8.17667	13.03	13.97	25.34	6.71	9.18	8.64
Mapk8ip1	-1.31623	2.04945	10.8091	0.00101002	0.0157461	2.10667	0.893333	1.33	2.19	2.8	0.82	0.53	1.33
Hmgcll1	3.17935	0.0600166	10.75	0.00104278	0.0162369	0.05	0.606667	0.04	0.02	0.09	0.4	1.42	0
Spn	-1.01315	1.70019	10.7436	0.00104641	0.0162734	1.77	0.966667	1.92	1.64	1.75	1.02	0.92	0.96
4930572J05Rik	-1.20574	1.25879	10.7316	0.00105324	0.0163594	2.88	1.18667	3.05	2.74	2.85	0.73	1.04	1.79
Prex1	-1.16913	3.68549	10.7204	0.00105962	0.0164383	3.06667	1.39	2.38	2.96	3.86	1.72	1.6	0.85
Slc16a9	1.09115	4.50031	10.7068	0.00106742	0.0165391	4.82	10.75	3.78	5.79	4.89	10.72	14.05	7.48
Kank3	1.33488	7.53086	10.7037	0.00106924	0.0165471	42.1467	108.81	40.76	40.37	45.31	49.77	98.4	178.26
Irgq	-1.0094	2.87398	10.671	0.0010883	0.016806	1.87333	0.96	1.65	1.82	2.15	1.07	1.08	0.73
Prkar1b	2.18321	0.733835	10.6704	0.00108862	0.016806	0.243333	1.26667	0.25	0.25	0.23	0.38	0.35	3.07
Dtx4	-1.201	0.656686	10.6487	0.00110146	0.0169834	0.426667	0.17	0.36	0.32	0.6	0.19	0.15	0.17
Ube2h	-0.979241	7.09498	10.6288	0.0011134	0.0171466	40.4333	23.1433	36.18	42.9	42.22	28.14	24.8	16.49
Mnda	1.17201	3.82335	10.6243	0.00111612	0.0171509	2.68333	6.26667	2.52	3.09	2.44	6.26	8.29	4.25
Sfrp4	-1.16208	4.48487	10.6238	0.00111639	0.0171509	22.4233	10.19	22.04	21.7	23.53	9.61	6.12	14.84
Entpd2	-1.01838	2.67205	10.6214	0.00111786	0.0171527	5.54667	2.64333	7.15	4.51	4.98	2.65	2.79	2.49
Ankrd37	1.20368	1.20998	10.6156	0.00112139	0.017186	1.12667	3.65333	0.89	1.6	0.89	2.84	3.98	4.14
Myc	0.968498	4.54691	10.5703	0.00114917	0.0175906	7.97667	15.9733	7.33	7.37	9.23	15.94	15.51	16.47
Ret	1.04699	3.74532	10.5662	0.00115176	0.0176088	1.40667	3.03333	1.16	1.35	1.71	2.42	4.03	2.65
Kcnk3	1.41542	-0.0925443	10.5615	0.00115467	0.0176321	0.146667	0.406667	0.15	0.09	0.2	0.31	0.26	0.65
Vcan	0.980221	2.97307	10.558	0.00115689	0.0176447	0.936667	1.68333	0.9	0.79	1.12	1.34	1.95	1.76
Gsta4	-1.17285	2.73591	10.5491	0.00116244	0.017708	14.0367	6.28333	18.25	14.61	9.25	8.87	4.71	5.27
Tro	-1.52435	0.992126	10.544	0.00116567	0.0177359	0.35	0.17	0.3	0.44	0.31	0.2	0.15	0.16
Cxcl2	1.10947	2.60937	10.5303	0.0011743	0.0178457	3.96	9.1	4.03	4.23	3.62	10.01	11.58	5.71
Chrm3	1.14941	2.23239	10.5281	0.00117572	0.0178459	0.656667	1.07	0.63	0.87	0.47	1.34	1.47	0.4
Sphk1	1.59249	2.8213	10.5234	0.00117874	0.0178702	1.86667	6.32	1.56	1.05	2.99	3.51	3.27	12.18
Osbpl10	-1.07374	1.98978	10.5106	0.00118691	0.0179727	2.86	1.23333	2.29	2.42	3.87	1.06	1.11	1.53
Ccl6	-3.14799	-1.09816	10.4878	0.00120166	0.0181742	0.79	0.0966667	2.12	0.05	0.2	0.08	0.21	0
Cxx1a	1.02615	6.63829	10.4528	0.00122464	0.0184997	41.9833	92.7733	42.24	35.95	47.76	76.51	80.74	121.07
2700099C18Rik	1.06066	0.843469	10.4502	0.00122636	0.0185036	0.596667	1.19333	0.68	0.39	0.72	1.42	1.7	0.46
Ndst1	-1.07257	4.76646	10.4438	0.00123062	0.0185458	6.71667	3.31333	6.4	7.38	6.37	4.3	3.51	2.13
Hsd11b1	-1.29263	3.53238	10.4337	0.00123737	0.0186067	15.6867	6.30667	15.92	15.55	15.59	5.84	3.18	9.9
Hmgcs2	-1.03085	3.1595	10.4333	0.0012376	0.0186067	4.30333	2.16667	4.2	3.58	5.13	1.88	1.97	2.65
Adarb2	2.77246	0.18892	10.4245	0.00124357	0.0186742	0.04	0.336667	0.07	0.05	0	0.31	0.68	0.02
Zfp423	-0.994759	5.693	10.4034	0.00125784	0.0188661	16.3833	8.52667	15.1	17.11	16.94	10.6	8.54	6.44
Pde6h	-1.01592	1.43619	10.4006	0.00125978	0.0188728	9.67	4.29667	10.07	9.18	9.76	4.6	3.91	4.38
Pde5a	-1.22391	2.09862	10.3643	0.00128478	0.0192247	1	0.42	1.49	0.69	0.82	0.54	0.44	0.28
AA986860	-1.09126	2.53385	10.3136	0.00132057	0.0197368	2.62333	0.983333	2.54	3.02	2.31	1.34	0.85	0.76
Smad6	-1.13997	7.2923	10.2927	0.00133556	0.0199374	86.0467	40.1067	74.32	68.84	114.98	28.33	40.66	51.33
Pdgfra	-1.04478	2.56454	10.2848	0.00134132	0.0199998	1.38	0.686667	1.66	1.38	1.1	0.89	0.57	0.6
Inhba	1.18056	3.92307	10.2821	0.00134324	0.0200048	7.26	17.1367	8.66	5.08	8.04	10.63	17.26	23.52
Casc4	-1.13682	3.39838	10.2644	0.00135624	0.0201747	4.22333	2.02333	5.31	3.95	3.41	2.7	2.24	1.13
Rgma	-1.14274	2.23187	10.261	0.00135874	0.0201882	2.00667	0.823333	1.87	1.93	2.22	1.15	0.85	0.47
Amigo1	-1.0531	3.66678	10.2443	0.00137109	0.0203477	3.94667	1.95667	3.19	4.18	4.47	2.2	2.36	1.31
Mfap4	-1.21152	5.2939	10.2347	0.00137826	0.0204104	46.77	20.7133	52.67	24.53	63.11	19.72	18.03	24.39
Gimap6	1.00605	7.92053	10.2343	0.00137854	0.0204104	128.75	266.327	139.27	143.93	103.05	209.64	277.83	311.51
Tubb6	1.33744	5.59564	10.2293	0.00138227	0.0204417	19.6467	51.0167	18.09	13.33	27.52	29.92	44.47	78.66
Zfp69	1.07421	2.91298	10.1676	0.00142929	0.0211125	1.34667	3.09667	1.26	1.47	1.31	2.44	2.69	4.16
Rn4.5s	1.05192	2.70236	10.1565	0.00143795	0.0212157	5.47	9.47333	4.98	8.39	3.04	10.99	7.63	9.8
Fam64a	1.18787	2.94008	10.138	0.00145245	0.0214046	3.97667	9.07333	3.67	2.47	5.79	7.38	11.97	7.87
Npcd	-1.02846	4.2404	10.1268	0.00146126	0.021489	3.77333	1.54667	3.3	3.57	4.45	2.07	1.24	1.33
C1qtnf9	1.29338	3.79685	10.1247	0.00146298	0.021489	4.98333	12.7367	2.67	4.51	7.77	9.33	15.82	13.06
Klk1b24	-2.03229	0.659412	10.1243	0.00146327	0.021489	3.25667	0.5	6.08	2.97	0.72	0.9	0.55	0.05
Cxx1b	1.00184	6.50149	10.092	0.00148912	0.0218432	38.3433	77.3133	38.89	33.93	42.21	64.86	73.44	93.64
Sv2a	-1.59372	-0.449794	10.0894	0.00149123	0.021849	0.266667	0.1	0.52	0.13	0.15	0.1	0.06	0.14
Epdr1	-1.06054	7.10199	10.0812	0.0014979	0.0219213	98.2867	48.22	88.7	93.27	112.89	37.69	41.71	65.26
Ltbp4	-1.04467	11.2781	10.0778	0.00150065	0.0219361	749.863	376.313	575.01	635.73	1038.85	375.11	375.43	378.4
Mir5107	0.995151	6.46487	10.0705	0.00150661	0.0219978	0	0	0	0	0	0	0	0
Flna	-1.13204	8.65535	10.0639	0.001512	0.0220512	76.0967	36.0033	80.32	73.55	74.42	50.58	38.34	19.09
Zfp697	1.19319	0.666334	10.056	0.00151855	0.0221212	0.156667	0.366667	0.14	0.15	0.18	0.44	0.22	0.44
Fbln7	-1.15291	2.73882	10.0484	0.00152483	0.0221872	3.75333	1.71333	4.53	2.51	4.22	2.18	1.16	1.8
Pygm	-1.16784	2.70509	10.0407	0.00153123	0.0222547	3.77667	1.58667	4.16	2.02	5.15	1.64	1.65	1.47
Emilin2	-1.16524	0.842498	10.0072	0.00155928	0.0226287	0.716667	0.326667	0.62	0.5	1.03	0.38	0.24	0.36
Ddr1	-1.03434	6.01484	10.0057	0.00156054	0.0226287	27.58	13.8467	23.16	22.99	36.59	17.15	11.91	12.48
Ripply3	0.962489	3.07867	9.98352	0.00157947	0.0228567	4.88	9.70667	5.54	4.99	4.11	8.38	10.6	10.14
Ptpn20	1.93026	0.325162	9.98199	0.00158079	0.0228567	0.18	0.776667	0.3	0.17	0.07	0.63	1.52	0.18
Gsg2	1.25101	0.347484	9.98096	0.00158168	0.0228567	0.276667	0.806667	0.15	0.29	0.39	0.59	1.16	0.67
Insr	1.00337	4.51105	9.97866	0.00158365	0.0228591	1.72333	3.67667	1.87	1.49	1.81	4.47	3.89	2.67
Tnc	-1.1556	3.63228	9.97015	0.00159099	0.0229389	2.75	1.19667	3.26	1.46	3.53	1.09	1.08	1.42
Angptl4	1.45893	4.90355	9.96484	0.00159558	0.022979	10.5167	29.3133	11.82	6.6	13.13	19.07	16.5	52.37
Myom1	-1.39976	3.25511	9.93696	0.00161993	0.023303	2.63667	0.916667	4.29	1.62	2	1.47	0.64	0.64
Ip6k3	-0.941521	5.20713	9.91273	0.0016414	0.0235851	25.8967	13.76	24.79	25.55	27.35	12.19	12.88	16.21
Ttc28	-1.00576	5.97131	9.90593	0.00164747	0.0236456	8.32667	4.25667	7.63	7.95	9.4	5.75	3.9	3.12
Podxl2	-1.57372	0.580234	9.89244	0.00165959	0.0237728	1.32667	0.37	1.4	0.62	1.96	0.08	0.25	0.78
Scrn1	-0.926074	3.96512	9.89188	0.00166009	0.0237728	12.37	6.75667	11.03	12.38	13.7	5.84	7.28	7.15
Rtn2	-1.01294	1.34503	9.88955	0.0016622	0.0237761	3.27333	1.33333	3.74	2.7	3.38	1.55	1.18	1.27
Dusp8	-1.13269	5.05936	9.87382	0.00167647	0.0239532	11.02	5.28	8.47	8.21	16.38	5.07	4.81	5.96
Actg2	-1.29596	4.34251	9.86019	0.00168894	0.0240849	28.4367	11.6233	37.46	13.83	34.02	11.86	7.29	15.72
Snhg10	1.147	1.38596	9.85957	0.0016895	0.0240849	4.5	10.96	4.21	4.96	4.33	9.15	7.13	16.6
Bmp2	1.18073	1.93068	9.85392	0.0016947	0.0241319	1.02667	2.49	1.52	0.77	0.79	1.83	3.53	2.11
Creb3l1	-0.91209	5.34063	9.83359	0.00171353	0.0243726	28.4	15.2767	27.29	27.52	30.39	15.07	17.29	13.47
Snai1	1.55651	-0.00925304	9.80336	0.00174193	0.0247487	0.37	1.07667	0.21	0.34	0.56	0.55	0.81	1.87
G0s2	-1.34194	4.98476	9.78165	0.00176262	0.0250146	81.6467	32.2233	86.52	92.97	65.45	27.45	15.14	54.08
Sox5	-0.992788	2.88964	9.77637	0.00176769	0.0250584	1.3	0.68	1.18	1.27	1.45	0.87	0.66	0.51
Ifitm1	0.999833	2.6972	9.7703	0.00177354	0.0251132	0.586667	1.71333	0.38	0.54	0.84	0.92	1	3.22
Fzd8	-1.00733	4.04218	9.75286	0.00179044	0.0253242	7.26	3.85	6.68	6.83	8.27	2.78	4.54	4.23
Ifi205	1.14375	3.12658	9.74891	0.00179429	0.0253504	0.483333	1.95	0.93	0.37	0.15	2.7	2.36	0.79
Ankrd57	-1.17783	1.85605	9.73455	0.00180836	0.0255207	1.31	0.593333	1.12	1.8	1.01	0.91	0.48	0.39
Sertad4	-0.901078	6.12532	9.72618	0.00181662	0.0256086	35.9533	19.7833	35.22	39.08	33.56	19.04	21.67	18.64
Plcl1	-1.23009	0.856747	9.72049	0.00182225	0.0256595	0.44	0.193333	0.45	0.32	0.55	0.25	0.24	0.09
Timp1	0.952852	3.7108	9.71399	0.0018287	0.0257217	14.57	28.44	14.7	13.48	15.53	26.81	24.85	33.66
Capg	0.922405	7.50141	9.70695	0.00183573	0.0257919	135.643	260.593	137	128.97	140.96	231.53	251.57	298.68
Stox2	1.02996	3.56243	9.69796	0.00184473	0.0258788	0.846667	1.86667	0.85	0.91	0.78	1.94	2.46	1.2
Enah	-1.21721	1.63592	9.69669	0.001846	0.0258788	1.15333	0.493333	1.47	0.7	1.29	0.68	0.49	0.31
Thbs1	-1.28697	10.1211	9.68373	0.00185907	0.0260332	316.49	136.217	155.93	380.82	412.72	161.78	165.64	81.23
Fndc8	2.70186	-0.250678	9.6709	0.0018721	0.0261866	0.0533333	0.78	0.1	0.06	0	0.22	0.15	1.97
Cmtm8	1.01991	3.05126	9.63881	0.00190508	0.0266186	6.68	14.0633	5.23	7.09	7.72	11.93	12.59	17.67
Fam38b	1.42374	1.24341	9.62401	0.0019205	0.0268045	0.08	0.246667	0.08	0.04	0.12	0.17	0.09	0.48
Slc1a4	-0.919402	3.7288	9.60853	0.00193676	0.0269993	5.32	2.87667	4.95	5.18	5.83	3.18	2.96	2.49
Pgm1	1.05755	5.10966	9.60666	0.00193873	0.0269993	11.6867	25.06	12.49	10.98	11.59	18.09	21.35	35.74
Rnpepl1	-1.01917	6.76006	9.60079	0.00194493	0.027056	55.8067	28.73	47.5	50.94	68.98	21.85	37.68	26.66
Pkd1	-1.06673	7.9347	9.58063	0.00196641	0.0273246	25.9	12.5033	23.52	22.06	32.12	14.16	16.04	7.31
Cd74	0.976878	9.15277	9.56978	0.00197807	0.0274565	395.107	810.1	380.87	503.55	300.9	825.44	936.24	668.62
Gpihbp1	2.72878	4.99165	9.56336	0.00198499	0.0275225	14.1333	93.4333	13.05	0.81	28.54	57.12	30.16	193.02
Mical2	-1.07609	7.13171	9.55147	0.0019979	0.0276448	32.27	15.65	33.88	33.53	29.4	21.78	16.46	8.71
Hspg2	-1.31514	6.3394	9.5512	0.00199818	0.0276448	8.61	3.52333	8.25	6.26	11.32	5.74	3.29	1.54
Tpx2	0.988793	2.90326	9.52045	0.00203195	0.0280552	1.35	2.80333	1.69	1.19	1.17	2.64	3.51	2.26
Gm12824	-1.31184	1.69627	9.52015	0.00203228	0.0280552	0.8	0.33	1.17	0.39	0.84	0.4	0.19	0.4
Ubtd1	1.07072	3.95873	9.50045	0.00205421	0.0283271	8.31	17.8433	8.53	7.21	9.19	13.47	15	25.06
Rhoq	-0.908446	5.60837	9.49134	0.00206443	0.0284371	17.14	8.54333	17.11	15.58	18.73	8.61	9.98	7.04
Fabp5	0.958472	5.49994	9.46025	0.00209972	0.0288917	44.09	90.0167	49.75	32.19	50.33	94.97	96.53	78.55
Ccdc107	0.954972	5.22427	9.43914	0.00212403	0.0291944	39.05	75.0367	44.37	32.79	39.99	66.22	65.92	92.97
Glce	-1.33606	7.27174	9.43336	0.00213073	0.0292548	57.2867	23.57	64.29	66.24	41.33	36.61	25.4	8.7
Casq1	-1.53149	2.23942	9.42561	0.00213976	0.0293469	4.39667	1.53	4.51	1.92	6.76	1.94	0.57	2.08
Klhdc8a	-1.3755	-0.00629788	9.38209	0.00219115	0.0300193	0.39	0.13	0.25	0.25	0.67	0.06	0.16	0.17
Slc27a2	2.44485	-0.654555	9.37604	0.0021984	0.0300861	0.0866667	0.586667	0.09	0.13	0.04	0.49	1.27	0
Casc5	1.12602	1.12986	9.3643	0.00221252	0.0302465	0.216667	0.466667	0.16	0.18	0.31	0.48	0.61	0.31
Kif23	1.10136	3.48256	9.35242	0.00222691	0.0304104	2.16	5.05667	2.2	1.71	2.57	4.41	7.51	3.25
Foxp2	1.11663	3.29307	9.34971	0.00223021	0.0304225	1.06667	2.36667	1.24	0.92	1.04	1.68	1.85	3.57
Stard10	-0.997616	3.52495	9.34774	0.0022326	0.0304225	16.56	8.33667	16.63	15.82	17.23	7.4	6.64	10.97
Loxl1	-1.22088	4.17851	9.34409	0.00223706	0.0304505	9.01667	3.81	10.42	5.09	11.54	3.38	2.52	5.53
Furin	-1.17968	5.16204	9.30722	0.00228252	0.031036	13.6767	6.02	8.15	11	21.88	5.7	7.55	4.81
Efna5	-1.08133	7.42334	9.30293	0.00228788	0.0310754	51.86	25.13	41.83	42.29	71.46	28.92	17.73	28.74
Fibin	-1.05073	3.38695	9.28957	0.00230462	0.0312692	8.27667	4.12667	9.94	5.85	9.04	4.46	3.04	4.88
S100a10	0.987575	7.99672	9.27816	0.00231902	0.0314078	436.87	876.717	455.12	382.86	472.63	836.36	663.98	1129.81
Glt28d2	-0.914016	3.66715	9.27755	0.0023198	0.0314078	6.91667	3.80333	6.66	6.42	7.67	3.74	3.35	4.32
Syne1	0.884791	4.91331	9.27541	0.0023225	0.0314109	2.97333	6.01667	3.05	3.06	2.81	6.35	6.11	5.59
Wdr81	-1.09398	3.13165	9.26765	0.00233236	0.0315105	1.93	0.936667	1.59	1.98	2.22	1.41	0.58	0.82
Timp2	-0.983886	10.8929	9.21142	0.00240511	0.0324353	842.127	442.55	774.15	877.76	874.47	387.08	616.41	324.16
Cenpa	0.936238	3.73278	9.20994	0.00240705	0.0324353	7.36667	14.0133	7.66	6.2	8.24	11.87	13.79	16.38
Adcy7	-0.924273	3.38053	9.20884	0.0024085	0.0324353	2.51333	1.26333	2.61	2.48	2.45	0.97	1.26	1.56
Gm347	-1.12361	0.970004	9.19641	0.0024249	0.0326215	0.56	0.253333	0.61	0.59	0.48	0.39	0.19	0.18
P4ha3	-1.31595	3.61413	9.16312	0.00246941	0.033185	8.66	3.47667	5.9	7.49	12.59	1.58	3.91	4.94
Itprip	0.953903	5.0842	9.15426	0.0024814	0.0333108	7.22	14.33	6.41	7.99	7.26	11.76	13.32	17.91
Mmp2	-0.927695	8.12131	9.14727	0.0024909	0.0334028	144.407	78.3767	120.61	133.95	178.66	74.64	77.2	83.29
Plxna4	-1.06674	6.22912	9.14133	0.00249899	0.0334759	9.03333	4.37	7.55	8.15	11.4	4.94	5.71	2.46
Pde3a	-1.24176	6.50784	9.13522	0.00250736	0.0335525	30.1567	12.8767	26.72	36.7	27.05	18.1	15.07	5.46
Ltbp3	-0.974811	7.85306	9.1242	0.0025225	0.0337195	62.96	30.3567	50.51	50.72	87.65	28.03	33.39	29.65
Hpgd	1.70241	3.49756	9.11491	0.00253535	0.0338554	3.98	13.77	5.05	4.22	2.67	11.82	26.53	2.96
Dopey2	-1.03328	5.72284	9.10969	0.00254259	0.0339164	11.8933	6.92	10.18	14.68	10.82	8.6	6.19	5.97
Plxdc1	1.27497	1.79257	9.10665	0.00254682	0.033937	0.596667	1.71	0.66	0.37	0.76	0.95	1.11	3.07
Man1b1	-0.897999	5.90096	9.1003	0.00255567	0.0340192	24.72	13.4333	22.66	24.76	26.74	15.42	14.18	10.7
Clstn1	-1.40806	6.8122	9.09101	0.00256868	0.0341565	51.8333	19.6567	21.3	49.92	84.28	12.51	30.8	15.66
Atl2	-1.00846	8.63338	9.08234	0.0025809	0.0342829	179.117	92.0033	188.8	211.23	137.32	120.44	93.66	61.91
S100a7a	1.10805	0.378308	9.06078	0.00261151	0.0346365	1.13333	2.77	0.62	1.25	1.53	2.22	3.82	2.27
Napepld	-0.881194	4.3691	9.05974	0.00261299	0.0346365	8.36333	4.68667	8.94	8.79	7.36	4.79	5.13	4.14
Echdc2	-0.9229	2.34691	9.05255	0.00262328	0.0347366	5.50667	3.01	6.33	5.54	4.65	3.26	2.79	2.98
Col5a1	-1.02273	6.4715	9.03492	0.00264871	0.0350366	15.0533	7.64667	13.58	11.86	19.72	10.31	6.77	5.86
Gpm6b	-1.387	1.48938	9.03044	0.00265521	0.0350859	1.03	0.42	1.28	1	0.81	0.75	0.39	0.12
Frrs1	-0.91513	5.68995	9.02102	0.00266893	0.0352304	31.8167	17.32	30.67	33.18	31.6	20.81	18.3	12.85
Hbb-b1	-3.29207	3.1386	8.99448	0.00270797	0.0356713	4.63	0.496667	12.14	0	1.75	0	0	1.49
Hbb-b2	-3.29207	3.1386	8.99448	0.00270797	0.0356713	3.83	0	10.54	0.11	0.84	0	0	0
Sncg	0.867166	6.91989	8.97993	0.00272962	0.035885	170.91	315.737	182.53	178.5	151.7	321.22	302.34	323.65
Gypc	0.948731	6.06508	8.97977	0.00272986	0.035885	26.6533	52.57	27.91	27.26	24.79	40.94	49.37	67.4
Trpc1	-1.11554	2.47513	8.97394	0.00273858	0.0359623	2.43667	1.06667	2.59	2.68	2.04	1.09	1.53	0.58
Cables1	-1.03672	5.56857	8.95181	0.00277194	0.0363627	22.66	11.3967	19.16	19.46	29.36	8	11.74	14.45
Scamp5	-1.02558	1.67017	8.94539	0.0027817	0.036453	1.53	0.736667	1.55	1.61	1.43	0.58	1.03	0.6
Nfkbie	0.966631	3.6036	8.93694	0.0027946	0.0365577	3.88	7.98333	3.11	3.57	4.96	6.33	8.62	9
Gfra4	-1.32984	0.237206	8.93638	0.00279547	0.0365577	0.823333	0.27	0.87	0.35	1.25	0.15	0.19	0.47
A330069E16Rik	1.00286	0.558809	8.9309	0.00280387	0.0366297	1.1	2.56333	0.86	1.12	1.32	2.33	2.33	3.03
Lrig3	-1.09553	4.03211	8.92344	0.00281533	0.0367415	6.4	3.07667	4.69	7.74	6.77	3.48	4.09	1.66
Sned1	-1.01132	4.62985	8.91881	0.00282249	0.036797	7.34333	3.66333	4.88	6.66	10.49	3.39	3.49	4.11
Abcc9	-1.41361	3.00375	8.88136	0.00288097	0.0375076	1.78	0.653333	2.49	1.56	1.29	1.23	0.44	0.29
Bgn	-0.936086	10.6798	8.88012	0.00288292	0.0375076	1108.41	603.233	1100.38	1048.69	1176.15	728.63	674.05	407.02
Pdzrn3	-1.25228	1.1701	8.87782	0.00288656	0.0375163	0.883333	0.383333	0.84	0.54	1.27	0.28	0.28	0.59
Grina	0.868911	7.27835	8.86447	0.00290775	0.0377531	81.9	152.45	84.13	84.48	77.09	132.55	168.95	155.85
F2rl3	-1.07203	0.570294	8.85373	0.00292491	0.0379369	1.39333	0.666667	1.37	1.12	1.69	0.78	0.78	0.44
Akap5	-1.02322	0.892851	8.8466	0.00293635	0.0380463	0.293333	0.163333	0.26	0.34	0.28	0.22	0.12	0.15
2700023E23Rik	1.00779	2.13506	8.83571	0.00295392	0.0382207	3.58	7.44667	3.47	4.68	2.59	5.73	8.52	8.09
H6pd	-0.970293	4.50128	8.83453	0.00295585	0.0382207	7.52	3.98667	6.12	7.3	9.14	3.06	4.2	4.7
Glt8d2	-1.03013	2.76397	8.83046	0.00296244	0.0382668	5.12667	2.49667	5.52	5.8	4.06	2.27	1.89	3.33
Rab43	-0.881597	4.71614	8.82404	0.00297288	0.0383626	8.8	4.82	7.69	8.72	9.99	4.72	5.05	4.69
Tram1l1	0.974527	2.39809	8.81527	0.0029872	0.0385082	2.04	4.18333	1.98	2.33	1.81	3.74	5.7	3.11
Epas1	-0.951785	9.03767	8.80782	0.00299943	0.0386264	124.337	70.47	119.29	122.79	130.93	91.82	69.41	50.18
Serpina1e	-1.04357	5.23714	8.78218	0.00304187	0.0391331	33.4367	15.0667	32.25	30.14	37.92	9.97	15.5	19.73
Reck	-1.11918	7.49985	8.77981	0.00304583	0.0391443	68.0533	32.6533	70.15	73.5	60.51	44.04	38.73	15.19
Cdkn3	0.975149	1.19562	8.77706	0.00305043	0.0391637	1.92667	3.80333	2.22	1.29	2.27	3.75	4.34	3.32
Snhg12	0.982244	1.26391	8.76211	0.00307553	0.0394459	2.98	5.94	3.75	2.02	3.17	5.36	5.92	6.54
Grb14	-1.24605	1.95087	8.73946	0.00311397	0.0398985	3.18333	1.31333	3.99	2.03	3.53	1.77	0.63	1.54
Tmem40	1.09745	0.925034	8.73584	0.00312015	0.0399373	1.30333	2.75667	1.27	1.06	1.58	2.06	2.3	3.91
4632434I11Rik	1.07664	0.579241	8.71681	0.0031529	0.0403157	0.33	0.673333	0.39	0.35	0.25	0.42	1	0.6
Dzip1l	-1.16804	1.96156	8.70738	0.00316924	0.0404838	1.40333	0.576667	1.21	1.39	1.61	0.92	0.41	0.4
Cenpf	0.959917	2.79575	8.70009	0.00318194	0.040605	0.43	0.893333	0.5	0.33	0.46	0.74	1.22	0.72
Gins2	1.05837	2.03895	8.69489	0.00319103	0.0406801	2.44667	6.26667	2.44	2.24	2.66	4.6	4.07	10.13
Txnrd3	-0.898754	5.83148	8.68311	0.00321172	0.0409026	31.1133	17.0833	31.24	31.75	30.35	21.65	16.74	12.86
Kctd17	1.09758	5.16025	8.67853	0.0032198	0.0409643	17.06	37.4233	16.45	14.95	19.78	29.6	25.73	56.94
Eln	-1.70774	11.3095	8.67124	0.00323272	0.0410873	1050.64	326.62	448.46	487.2	2216.27	255.63	188.01	536.22
Bcr	1.15736	5.6601	8.65742	0.00325732	0.0413584	5.03333	11.3633	4.48	4.88	5.74	6.97	9.11	18.01
Sgca	-1.02671	1.10899	8.65371	0.00326396	0.0414012	2.33667	1.10333	2.82	1.59	2.6	0.99	1.04	1.28
Ly6a	0.86077	10.531	8.6512	0.00326846	0.0414168	1826.72	3394.66	1829.77	2055.53	1594.85	3804.37	3480.93	2898.67
Scarf2	-1.17598	4.42743	8.64466	0.00328021	0.0415242	10.14	4.62667	8.1	6.18	16.14	3.53	4.34	6.01
Pigg	-0.951115	4.41697	8.62948	0.00330766	0.0418025	8.26	4.29	6.25	9.29	9.24	5.15	4.67	3.05
Plk1	1.15126	1.76228	8.62885	0.0033088	0.0418025	1.12333	2.68	1.22	0.61	1.54	2.12	3.61	2.31
1110004E09Rik	1.1002	3.61576	8.61885	0.00332702	0.0419907	8.56	18.46	8.97	7.11	9.6	14.27	12.88	28.23
Dcbld2	0.899075	3.83549	8.60549	0.00335151	0.0422578	1.72333	3.29	1.72	1.42	2.03	2.83	3.45	3.59
Hspa4l	0.854583	5.09058	8.59599	0.00336904	0.0424365	7.51333	13.9933	7.57	7.23	7.74	12.61	16.09	13.28
Plekhf1	1.11457	2.82677	8.58244	0.00339421	0.042711	3.77	8.48667	3.74	2.68	4.89	5.08	8.27	12.11
Fam55d	0.993133	4.10361	8.53471	0.00348438	0.0438021	3.95667	8.30667	4.83	4.7	2.34	9.02	9.15	6.75
Sord	0.966888	5.19709	8.53074	0.00349198	0.0438541	13.6233	27.35	15.52	13.43	11.92	18.21	30.2	33.64
Lynx1	-0.891872	5.26623	8.52605	0.00350098	0.0439196	14.8867	8.14	12.37	15.42	16.87	9.63	7.05	7.74
Tshz3	0.949658	2.11605	8.52442	0.00350413	0.0439196	0.68	1.33667	0.89	0.61	0.54	1.32	1.56	1.13
Slamf8	-1.2836	0.300462	8.51941	0.00351378	0.0439279	0.96	0.423333	1.14	1.32	0.42	0.39	0.61	0.27
Rrm2	1.11167	2.54172	8.51893	0.00351471	0.0439279	1.98667	4.52667	1.84	1.44	2.68	2.65	6	4.93
Abcb9	-0.878734	2.89793	8.51867	0.00351521	0.0439279	3.13	1.66667	3	2.71	3.68	1.63	1.77	1.6
Gpam	-1.3789	2.97849	8.51395	0.00352433	0.0439986	3.08333	1.23333	3.1	3.55	2.6	1.89	1.45	0.36
Cpd	-0.919128	7.76395	8.50357	0.00354451	0.0442069	36.4767	20.0167	33.41	40.21	35.81	21.32	24.98	13.75
Lpl	1.6913	4.29375	8.49607	0.00355915	0.0443457	2.66333	8.86	2.9	0.99	4.1	4.6	4.57	17.41
Loxl4	-1.10846	3.96286	8.47055	0.00360942	0.044907	4.53333	2.14333	3.13	4	6.47	3.19	1.87	1.37
Rnf144a	-1.00326	4.91131	8.46961	0.00361129	0.044907	9.12	4.66667	8.09	9.17	10.1	6.36	2.83	4.81
Ces2d-ps	1.53494	0.884933	8.46524	0.00361998	0.0449708	0.0633333	0.146667	0.04	0.15	0	0.31	0.13	0
Abcg2	0.936245	7.42853	8.44598	0.00365851	0.045405	56.2933	111.71	58.49	61.97	48.42	87.87	153.47	93.79
Acpp	-1.53838	4.66462	8.42022	0.0037107	0.0460076	10.1267	3.54	12.23	13.44	4.71	6.52	2.93	1.17
Ranbp17	-1.17902	2.82356	8.41694	0.0037174	0.0460456	2.08667	0.886667	2.28	2.45	1.53	0.8	1.51	0.35
Pbk	1.12428	2.6877	8.41056	0.00373048	0.0461624	3.25667	7.21	3.18	1.94	4.65	4.99	9.94	6.7
Cdh13	0.833079	10.0268	8.39119	0.00377045	0.0466114	388.24	715.317	403.99	371.79	388.94	730.45	797.71	617.79
Acot7	0.989134	4.75617	8.37758	0.00379878	0.0469158	15.38	30.37	15.69	14.83	15.62	20.8	28.32	41.99
Rhobtb2	-0.959694	2.5689	8.3712	0.00381214	0.0470099	1.69333	0.88	1.58	1.81	1.69	1.2	0.67	0.77
Gcnt2	1.26985	4.35384	8.3704	0.00381382	0.0470099	3.43667	8.8	3.9	2.79	3.62	9.65	13.73	3.02
Grin3a	-1.72755	1.20653	8.3661	0.00382286	0.0470755	1.16333	0.386667	1.37	1.31	0.81	0.59	0.57	0
Krt18	0.878202	7.06618	8.34861	0.00385983	0.0474846	85.94	163.017	71.66	86.34	99.82	143.66	178.34	167.05
Ccdc157	-0.913903	5.28761	8.34542	0.0038666	0.0475217	11.0333	5.6	8.56	11.22	13.32	6.87	5.68	4.25
Entpd5	-0.922212	5.5269	8.32776	0.00390439	0.0479395	14.3667	7.87667	13.41	17.05	12.64	9.1	9.2	5.33
C77080	0.88504	2.83428	8.32082	0.00391931	0.0480761	1.04333	2.10333	1.12	0.82	1.19	2.12	2.13	2.06
Gtse1	1.08901	1.20521	8.31144	0.00393961	0.0482783	0.6	1.32667	0.33	0.48	0.99	1.11	1.25	1.62
Htra4	-0.919635	4.35027	8.3067	0.00394991	0.0483163	15.1967	8.13333	15.48	16.08	14.03	6.84	6.88	10.68
Pcdh17	1.51537	0.356374	8.3065	0.00395034	0.0483163	0.08	0.203333	0.09	0.05	0.1	0.22	0.35	0.04
Slc12a5	-0.94622	1.66472	8.30308	0.00395779	0.0483542	0.726667	0.37	0.86	0.75	0.57	0.44	0.29	0.38
C1ra	-0.847417	8.21127	8.29989	0.00396476	0.0483542	138.887	80.5467	127.08	152.13	137.45	85.94	90.05	65.65
Ulk1	-0.960898	5.54941	8.29948	0.00396564	0.0483542	13.5433	7.27	11.62	15.24	13.77	8	9.25	4.56
Stbd1	-1.19553	6.27346	8.29737	0.00397026	0.0483542	69.9533	31.49	66.05	39.67	104.14	29.04	20.95	44.48
Ptpn18	1.31003	3.04011	8.29633	0.00397254	0.0483542	2.90333	7.70667	4.12	2.35	2.24	4.73	4.75	13.64
Islr	-0.982379	4.05536	8.28737	0.00399218	0.0485465	12.7867	6.72667	13.92	8.55	15.89	6.02	6.03	8.13
Synrg	-0.935264	3.98708	8.26238	0.0040475	0.0491258	5.26333	2.91667	4.77	5.61	5.41	3.25	3.59	1.91
Cd68	1.21203	0.275968	8.26235	0.00404757	0.0491258	0.323333	1.17333	0.46	0.28	0.23	1.56	0.99	0.97
Slc37a2	1.23853	0.765496	8.24954	0.00407624	0.0494263	0.213333	0.63	0.26	0.22	0.16	0.67	0.97	0.25
Hs3st1	0.818649	8.63637	8.24689	0.00408218	0.0494511	220.457	399.947	234.76	223.82	202.79	413.11	418.64	368.09
Pacs1	-0.957066	5.75471	8.23655	0.0041055	0.049686	18.9267	10.0267	16.94	20.79	19.05	11.21	12.71	6.16
Ube2o	-0.998426	3.26292	8.22306	0.00413613	0.0500088	2.79	1.45333	2.33	2.53	3.51	1.33	2.09	0.94
Synm	1.08898	3.50365	8.19899	0.00419136	0.0506283	1.12333	2.64	0.8	0.75	1.82	2.3	3.21	2.41
Aurka	0.90765	2.39357	8.19207	0.00420739	0.0507477	2.27	4.52333	1.84	1.94	3.03	4.2	4.86	4.51
Me1	-0.885347	6.35025	8.19126	0.00420926	0.0507477	40.0167	22.26	43.03	43.15	33.87	25.61	25.11	16.06
Tub	-1.04703	1.5814	8.18758	0.00421781	0.0508024	0.626667	0.29	0.89	0.42	0.57	0.38	0.31	0.18
Kif7	-1.02635	0.890488	8.18109	0.00423294	0.0509361	0.54	0.253333	0.44	0.59	0.59	0.33	0.24	0.19
Rab38	-0.987506	1.56652	8.16002	0.00428239	0.0514365	3.23	1.59667	3.71	3.48	2.5	1.71	1.95	1.13
Atp1a2	-1.14486	2.65703	8.15991	0.00428265	0.0514365	1.6	0.716667	1.65	0.96	2.19	0.77	0.42	0.96
C1rb	-0.84575	7.15314	8.14495	0.00431812	0.0518133	0.0833333	0.0733333	0.13	0.04	0.08	0.09	0.06	0.07
Pfkfb3	-0.944351	6.61029	8.13895	0.00433243	0.0519358	30.41	16.1333	21.35	39.14	30.74	19.04	16.72	12.64
Kpna2	0.871846	5.79502	8.09498	0.00443881	0.0531607	24.7667	46.4233	28.07	19.87	26.36	39.66	49.25	50.36
Tnfrsf11a	0.99584	3.89234	8.06546	0.00451169	0.0539826	2.17333	4.43333	2.54	1.32	2.66	4.17	5.6	3.53
Beta-s	-3.21562	3.4075	8.0596	0.00452631	0.0540736	23.3167	2.41333	59.4	0.32	10.23	0.65	0.46	6.13
Dpt	-0.900105	2.81916	8.05899	0.00452785	0.0540736	6.76667	3.75	8.55	6.52	5.23	3.84	3.65	3.76
Pkp2	-1.01973	4.07351	8.053	0.00454284	0.0541626	9.32333	4.71	8.47	11.19	8.31	6.12	5.39	2.62
Mustn1	0.993499	6.24816	8.05259	0.00454385	0.0541626	56.5133	114.56	65.63	41.25	62.66	83.79	103.74	156.15
Vav2	-1.09351	2.53614	8.0479	0.00455565	0.0542142	2.49	1.11667	2.25	2.42	2.8	0.99	1.77	0.59
Cyth4	0.849206	2.84099	8.0471	0.00455766	0.0542142	2.06333	3.86333	1.79	2.2	2.2	3.89	3.66	4.04
Ets1	0.807959	5.90223	8.04576	0.00456103	0.0542142	10.1733	18.3333	10.35	10.26	9.91	18.75	19.28	16.97
Npr2	-0.854108	5.99399	8.04132	0.00457223	0.0542963	25.1067	14.39	24.87	24.9	25.55	15.76	16.57	10.84
Fbln2	-0.88535	10.8108	8.01731	0.00463322	0.0549691	617.027	347.997	507.02	633.01	711.05	364.92	416.59	262.48
Plvap	1.12475	9.82809	8.00573	0.00466296	0.0552401	342.587	770.483	296.82	323.69	407.25	364.71	1127.14	819.6
Depdc1a	1.1202	1.55645	8.00501	0.0046648	0.0552401	0.786667	1.70667	0.94	0.54	0.88	2.15	2.28	0.69
Kank4	-1.12613	2.11679	7.99436	0.00469233	0.0555143	1.45667	0.66	1.51	0.93	1.93	0.78	0.86	0.34
Gm5860	1.15534	0.0635961	7.99109	0.00470081	0.0555626	0.48	0.746667	0.71	0.37	0.36	0.91	0.37	0.96
Zhx2	-0.904058	3.37524	7.97841	0.00473385	0.0558957	3.62	2.01	3.21	3.74	3.91	2.49	2.16	1.38
Asap2	-0.968778	6.45311	7.97689	0.00473782	0.0558957	21.2867	10.1233	22.39	21.91	19.56	12.76	12.44	5.17
Fblim1	-0.816992	8.90195	7.96733	0.00476291	0.0561394	233.663	138.04	220.53	225.18	255.28	152.07	138.68	123.37
Mllt1	-0.852775	4.88704	7.96211	0.00477667	0.0562492	12.4633	7.05333	12.53	11.23	13.63	6.58	8.55	6.03
Ncor2	-0.905657	4.21147	7.95844	0.00478636	0.056311	2.75	1.46333	2.23	2.27	3.75	1.4	1.59	1.4
Cldn5	0.906525	8.36707	7.92634	0.00487203	0.0572655	213.657	406.727	261.22	177.29	202.46	332	373.55	514.63
Kcnmb1	-1.29407	4.06948	7.91214	0.00491041	0.0575986	6.73	2.78	8.95	3.27	7.97	2.77	1.35	4.22
Gas1	-1.05978	2.96115	7.91207	0.0049106	0.0575986	3.87667	1.86667	4.01	3.07	4.55	1.41	1.35	2.84
Pcdh9	-1.27417	4.74369	7.91081	0.00491401	0.0575986	7.86	3.34333	8.13	9.89	5.56	4.97	3.97	1.09
Efs	-1.09811	0.678619	7.90712	0.00492405	0.0576628	0.676667	0.33	0.86	0.5	0.67	0.3	0.2	0.49
Slc4a3	-0.858327	3.52818	7.89602	0.00495437	0.0579643	3.51333	2.01	2.83	3.42	4.29	2.06	1.88	2.09
Fam47e	-1.27511	0.510582	7.89142	0.00496699	0.0580583	1.30667	0.473333	0.71	1.48	1.73	0.54	0.14	0.74
Plekhb2	-0.8469	6.90862	7.88613	0.00498154	0.0581747	57.2533	32.9867	53.09	54.12	64.55	38.75	34.02	26.19
Khdrbs3	-1.02466	1.94273	7.8675	0.00503312	0.0587229	3.26667	1.65667	4.59	2.54	2.67	1.55	1.17	2.25
Sgol1	0.962315	1.21317	7.86157	0.00504964	0.0588113	0.47	0.983333	0.51	0.39	0.51	0.81	1.36	0.78
C1rl	-0.852684	3.68892	7.86145	0.00504999	0.0588113	6.61333	3.74333	5.52	7.28	7.04	4	3.27	3.96
Trp53inp2	-0.978747	4.78387	7.85697	0.00506251	0.058875	11.05	5.83	10.89	9.3	12.96	7.83	6.29	3.37
Lgmn	0.888786	8.11868	7.85617	0.00506477	0.058875	130.12	248.007	149.65	153.01	87.7	264.11	266.41	213.5
Slc2a6	0.947569	0.82985	7.85194	0.00507662	0.0589586	0.616667	1.38333	0.55	0.49	0.81	1.27	1.74	1.14
Mgmt	0.988445	1.71884	7.85007	0.00508188	0.0589657	3.61667	7.44333	4.45	2.77	3.63	6.2	6.51	9.62
Pcx	-0.9646	2.53826	7.84793	0.0050879	0.0589814	2.1	1.15333	1.56	2.36	2.38	1.33	1.4	0.73
Apba1	-0.850858	3.87746	7.84542	0.00509497	0.0590093	3.13333	1.80333	2.56	3.26	3.58	1.87	2.05	1.49
Mpzl1	0.962682	6.06711	7.83938	0.00511202	0.0591527	24.3833	48.4933	25.17	19.33	28.65	38.66	40.02	66.8
Nudt14	0.902458	3.63392	7.8321	0.00513263	0.059337	14.4967	27.94	17.66	13.17	12.66	25.14	23.35	35.33
Atp1b2	-1.07421	1.79905	7.81951	0.00516853	0.0596975	1.79667	0.866667	2.15	0.9	2.34	1.03	0.76	0.81
Fam59a	-0.858896	2.57855	7.79417	0.0052415	0.0604851	1.81333	1.09333	1.97	1.68	1.79	0.93	1.32	1.03
Dupd1	-1.06161	0.322793	7.78499	0.0052682	0.0607378	1.70333	0.84	2.11	1.75	1.25	1.31	0.6	0.61
Mfhas1	-0.928837	2.94011	7.76981	0.00531267	0.0611948	1.8	0.953333	1.78	1.28	2.34	1.02	1.07	0.77
Gm10391	1.17385	0.722405	7.74635	0.00538211	0.0618821	0.0533333	0.156667	0.03	0.1	0.03	0.11	0.19	0.17
Gm10394	1.17385	0.722405	7.74635	0.00538211	0.0618821	0.0533333	0.156667	0.03	0.1	0.03	0.11	0.19	0.17
Cnksr1	0.909728	1.21775	7.74073	0.00539889	0.0620186	0.693333	1.40667	0.65	0.55	0.88	1.26	1.77	1.19
Mir1901	-1.00909	0.976398	7.7375	0.00540856	0.0620734	2.24	0	0	6.72	0	0	0	0
Hmga1-rs1	0.833914	4.2015	7.72955	0.00543242	0.0622258	6.16333	9.71667	6.41	4.93	7.15	5.26	14.8	9.09
Hist2h3c2-ps	-1.03696	0.458078	7.72839	0.00543591	0.0622258	2.22667	1.03667	2.23	1.9	2.55	0.83	1.02	1.26
Cacna2d1	-1.1374	1.94057	7.72661	0.00544129	0.0622258	0.773333	0.36	1.02	0.45	0.85	0.4	0.52	0.16
Sap30	1.09365	2.53715	7.72654	0.0054415	0.0622258	4.1	8.81333	4.09	3.29	4.92	4.57	8.96	12.91
Fhl1	-0.798108	10.4376	7.72174	0.00545599	0.0623352	922.867	549.273	1008.07	904.32	856.21	613.39	538.12	496.31
Fam168b	-0.914917	5.98436	7.7132	0.00548184	0.0625741	19.5333	10.6833	16.05	17.7	24.85	10.61	13.57	7.87
Hmga1	0.834256	4.20873	7.70498	0.00550687	0.0628032	3.90667	8.61333	3.7	4.52	3.5	9.78	5.26	10.8
Pcdhb12	0.978601	0.602454	7.70235	0.00551491	0.0628382	0.376667	0.796667	0.46	0.46	0.21	0.57	1.07	0.75
Zfp941	0.887814	2.63709	7.69809	0.00552793	0.0629299	0.156667	0.303333	0.06	0.28	0.13	0.41	0.27	0.23
Gm5617	0.994832	1.71315	7.68892	0.00555609	0.0631936	5.38333	11.21	4.88	4.97	6.3	8.06	10.09	15.48
9230116N13Rik	0.968672	0.57221	7.67843	0.00558847	0.0635049	0.303333	0.836667	0.48	0.32	0.11	0.91	0.64	0.96
Mmp23	-1.07103	3.12709	7.66839	0.00561964	0.0638018	9.55667	4.69667	10.66	6.55	11.46	4.11	2.98	7
Traip	1.06361	0.515927	7.65914	0.00564854	0.0640725	0.283333	0.666667	0.2	0.44	0.21	0.58	0.88	0.54
Rsad2	0.915465	2.92173	7.65692	0.0056555	0.064094	1.60333	3.12333	1.39	1.29	2.13	3.33	2.47	3.57
1190002H23Rik	1.7134	3.39964	7.63981	0.00570939	0.0646468	7.13333	23.58	5.23	1.88	14.29	13.41	9.87	47.46
Dbndd2	0.879382	6.2906	7.63767	0.00571617	0.0646658	17.9467	33.9667	18.41	16.11	19.32	27.44	31.56	42.9
Pde10a	1.07161	1.20974	7.62838	0.0057457	0.0649061	0.203333	0.43	0.25	0.21	0.15	0.61	0.52	0.16
Ccdc18	1.06986	0.726294	7.62619	0.00575267	0.0649061	0.17	0.416667	0.15	0.21	0.15	0.53	0.49	0.23
Dock8	-1.07142	2.55568	7.62615	0.00575279	0.0649061	1.07667	0.483333	1.14	0.89	1.2	0.54	0.69	0.22
Usp18	0.984016	4.54806	7.61274	0.00579574	0.065313	10.31	21.3333	11.84	9.67	9.42	15.7	15.64	32.66
Rpp38	0.926807	2.61553	7.61167	0.00579918	0.065313	5.55667	11.0133	5.87	5.83	4.97	10.78	7.65	14.61
Cul7	-0.938678	2.9539	7.60659	0.00581554	0.0653248	2.03	1.08667	1.37	1.81	2.91	1.1	1.2	0.96
Gdf6	-1.42567	3.93048	7.60654	0.00581571	0.0653248	7.37667	2.94333	3.43	3.57	15.13	2.86	2.5	3.47
2810417H13Rik	1.18908	1.16333	7.60577	0.00581818	0.0653248	0.623333	1.53	0.26	0.59	1.02	0.85	1.83	1.91
Plk2	0.861209	7.93718	7.60494	0.00582087	0.0653248	74.28	139.847	67.63	91.37	63.84	124.4	174.09	121.05
Adam22	0.87111	2.15152	7.59704	0.00584643	0.0655536	0.193333	0.456667	0.21	0.21	0.16	0.31	0.65	0.41
Eps8	1.11758	5.35155	7.56755	0.00594287	0.0665759	6.73	15.4433	5.87	8.26	6.06	15.18	24.18	6.97
Eya2	-1.00049	2.33295	7.5646	0.00595257	0.0666256	3.06	1.54667	3.28	3.26	2.64	1.84	2.07	0.73
Ereg	-0.981048	3.731	7.55799	0.00597446	0.0668116	4.90333	2.53	3.76	5.07	5.88	3.56	2.49	1.54
Spry1	1.97908	2.56742	7.54781	0.0060083	0.0671306	1.12	4.64	0.77	0.46	2.13	1.27	1.79	10.86
Arid5a	0.962623	5.29478	7.54335	0.00602318	0.0672376	5.31667	10.6533	4.36	4.47	7.12	8.49	9.39	14.08
Pitpnc1	0.872781	4.09225	7.51991	0.00610209	0.0680584	2.07667	3.87	2.2	2.08	1.95	3.4	3.26	4.95
Cenpq	0.840985	2.5203	7.49803	0.00617664	0.0688293	3.53667	6.68333	3.98	3.18	3.45	6.01	6.36	7.68
Tead4	0.937794	1.84306	7.49288	0.00619435	0.068966	0.833333	1.61333	1.16	0.73	0.61	1.66	1.83	1.35
Rgs5	-1.17466	5.525	7.48345	0.00622686	0.0692669	43.17	19.6933	53.08	21.29	55.14	25.42	10.43	23.23
Sorcs2	-1.05158	0.594622	7.47498	0.00625622	0.0695324	0.366667	0.173333	0.28	0.43	0.39	0.12	0.15	0.25
Anxa1	0.822991	8.4884	7.46382	0.00629511	0.0699034	229.893	428.157	236.98	221.89	230.81	348.33	416.37	519.77
Asb4	0.964464	2.28624	7.46043	0.00630698	0.0699738	1.15	2.32667	1.17	1.2	1.08	2.78	2.88	1.32
Mrps6	0.856574	5.0339	7.4494	0.00634577	0.0703394	46.5033	84.3033	53.92	41.2	44.39	97.62	61.94	93.35
Myo7a	0.926162	3.36922	7.4479	0.00635105	0.0703394	1.02667	2.01333	0.94	1.06	1.08	1.39	1.84	2.81
Pam	-0.872666	9.39096	7.43903	0.00638244	0.0706252	242.203	136.273	204.88	222.42	299.31	119.99	121.47	167.36
Dennd5a	-0.904014	6.67064	7.42627	0.00642783	0.0710654	31.5533	17.4967	25.48	35.69	33.49	18.24	22.79	11.46
Gm4532	0.940207	0.591204	7.42137	0.00644537	0.0711971	2.14	4.48333	2.64	2.35	1.43	4.76	4.29	4.4
Robo2	2.31071	1.23966	7.40749	0.00649531	0.0716862	0.0866667	0.483333	0.16	0.04	0.06	0.82	0.63	0
Vil1	-0.922291	2.98096	7.4022	0.00651442	0.0718345	3.68333	1.94	3.19	3.02	4.84	2.62	1.7	1.5
Sfrp2	-1.70581	6.44558	7.39214	0.00655094	0.0721744	84.2067	26.4267	49.2	40.05	163.37	16.96	9.35	52.97
Bcl9l	-0.930638	3.53806	7.3849	0.00657736	0.0724025	2.76667	1.49667	2.4	3.05	2.85	1.98	1.68	0.83
Epn1	-0.811187	3.89425	7.37396	0.00661749	0.0727511	8.15	4.60333	7.81	7.5	9.14	4.94	4.54	4.33
Fam46b	-1.18979	1.39816	7.37314	0.00662053	0.0727511	2.00667	0.85	1.69	0.92	3.41	0.86	0.93	0.76
Slc2a13	-1.06021	2.10936	7.36637	0.00664551	0.0729623	1.03667	0.513333	1.13	1.26	0.72	0.63	0.68	0.23
Nav2	-0.970186	2.60031	7.35958	0.00667065	0.073122	0.626667	0.303333	0.73	0.62	0.53	0.45	0.29	0.17
Srpx2	-1.06614	3.43963	7.35932	0.00667161	0.073122	5.89	2.95667	4.49	5.89	7.29	2.75	1.69	4.43
Emp2	-0.900404	9.13744	7.35089	0.00670296	0.073402	257.29	142.957	256.18	270.48	245.21	186.7	156.33	85.84
Lrrc17	-1.14467	3.01987	7.34612	0.00672077	0.0735335	6.34333	2.86667	9.43	3.71	5.89	2.23	1.88	4.49
Uchl4	1.06042	0.605035	7.34404	0.00672855	0.0735551	0.353333	0.646667	0.44	0.49	0.13	0.64	0.48	0.82
Atp11a	-0.858293	5.30907	7.3382	0.00675043	0.0737306	7.66667	4.36667	5.86	8.85	8.29	4.14	5.26	3.7
Galnt6	-1.36593	0.0736246	7.32341	0.00680623	0.0742759	0.286667	0.113333	0.19	0.18	0.49	0.04	0.08	0.22
Apod	1.5288	1.0055	7.30461	0.0068778	0.0749923	0.596667	1.73	0.72	0.44	0.63	1.4	0.31	3.48
Fam107a	-1.00356	6.1429	7.28343	0.00695937	0.0758164	35.4267	18.22	28.54	22.69	55.05	20.52	15.38	18.76
Plxnb1	-1.11759	0.626638	7.27939	0.00697502	0.0759216	0.213333	0.09	0.28	0.25	0.11	0.03	0.11	0.13
Htra1	-0.885941	9.30143	7.27318	0.00699918	0.0760317	499.37	275.09	500.75	449.79	547.57	202.49	267.17	355.61
Efemp1	0.981243	8.5186	7.27251	0.00700179	0.0760317	155.21	318.377	175.08	161.14	129.41	392.04	402.69	160.4
Fosl1	0.938279	1.69214	7.27216	0.00700316	0.0760317	0.366667	1.26333	0.2	0.49	0.41	1.16	1.77	0.86
Arhgef19	-0.937344	1.30303	7.26965	0.00701295	0.0760728	0.96	0.45	0.85	0.72	1.31	0.38	0.51	0.46
Ces2e	1.04057	1.98946	7.2624	0.0070413	0.0763149	1.31	2.75	1.56	1.1	1.27	1.58	4.7	1.97
Cenpl	0.798573	3.65245	7.25398	0.00707442	0.076594	5.69	10.7567	6.18	5.77	5.12	10.08	11.48	10.71
Khsrp	-1.143	4.359	7.25237	0.00708075	0.076594	7.94333	3.72333	8.16	7.87	7.8	4.33	5.55	1.29
Mpp7	0.797446	4.40801	7.25124	0.0070852	0.076594	4.13333	10.0167	4.24	4.25	3.91	7.22	8.58	14.25
D2Ertd750e	1.0876	2.09125	7.24734	0.0071006	0.076695	1.02333	2.19667	1.33	0.71	1.03	1.83	3.5	1.26
Man2b2	-0.811786	5.10719	7.23909	0.00713331	0.0769254	15.1633	8.85333	14.33	15.04	16.12	10.58	8.92	7.06
Pdgfd	-0.784828	7.84889	7.2389	0.00713409	0.0769254	160.9	96.7267	153.16	155.4	174.14	101.53	107.19	81.46
Nrn1	-0.910493	0.875744	7.23424	0.00715259	0.0770593	1.86	0.986667	2	1.76	1.82	1.04	0.76	1.16
Rbm38	-0.956015	1.70622	7.22487	0.00719003	0.0773829	2.93667	1.50667	2.8	2.22	3.79	1.18	1.34	2
Cep70	0.834826	3.72571	7.22328	0.00719642	0.0773829	3.12667	6.09667	3.36	3.52	2.5	6.3	6.66	5.33
1810032O08Rik	0.921691	1.96739	7.22025	0.00720857	0.0773829	2.81667	5.88	2.94	3.11	2.4	4.03	7.07	6.54
Lrrc68	-1.00114	4.69543	7.22006	0.00720932	0.0773829	12.6133	6.54333	7.79	12.41	17.64	6.93	4.81	7.89
Ripk3	0.788194	3.84793	7.21782	0.00721835	0.0773829	3.06	8.72333	3.16	3.24	2.78	7.36	8.92	9.89
Bicc1	-0.956388	0.956683	7.21758	0.00721931	0.0773829	0.87	0.403333	0.79	1.01	0.81	0.42	0.46	0.33
Rps4y2	0.85212	4.09947	7.21479	0.00723051	0.0774374	18.0767	33.66	15.3	18.01	20.92	28.05	31.47	41.46
Ephb6	-0.909509	3.87776	7.21211	0.00724134	0.0774878	5.88667	3.18667	4.59	4.96	8.11	2.55	4	3.01
Adam33	-1.01651	3.18637	7.20324	0.00727722	0.0777739	3.43333	1.74667	2.65	2.9	4.75	1.6	1.07	2.57
Ebf4	-0.934011	1.48652	7.20246	0.00728036	0.0777739	1.50667	0.8	1.24	1.57	1.71	0.48	1.16	0.76
Ppp1r2	0.870909	8.28845	7.19178	0.00732383	0.0781635	66.5167	122.68	74.57	61.58	63.4	103.65	100.96	163.43
Dag1	-0.860696	7.08394	7.18962	0.00733264	0.0781635	45.7533	26.2233	40.34	41.19	55.73	31.14	28.93	18.6
Txndc5	-0.809293	9.2335	7.18896	0.00733535	0.0781635	353.987	209.953	314.46	348.41	399.09	203.45	253.3	173.11
4931414P19Rik	-0.80653	4.11809	7.18732	0.00734207	0.0781692	10.3633	6.05333	9.48	11.21	10.4	6.43	5.08	6.65
Mns1	1.1217	-0.0916461	7.18357	0.00735742	0.0782669	0.293333	0.693333	0.16	0.23	0.49	0.42	1.1	0.56
Sync	-0.97579	2.63947	7.1806	0.00736961	0.0783307	2.63	1.21333	2.84	1.15	3.9	1.25	1.16	1.23
E530011L22Rik	0.956458	0.561426	7.17624	0.00738753	0.0784553	0.17	0.203333	0.16	0.23	0.12	0.34	0.12	0.15
Hells	0.899245	0.954926	7.17365	0.00739821	0.0785029	0.43	0.85	0.41	0.48	0.4	0.6	0.8	1.15
Mlxip	-0.847634	5.42493	7.17074	0.0074102	0.0785643	16.49	8.58333	17.79	14.22	17.46	8.52	12.47	4.76
Bmp1	-0.799029	5.74869	7.16833	0.0074202	0.0786044	20.95	12.4167	19.44	20.58	22.83	10.56	14.83	11.86
Pigx	0.903744	4.90239	7.14096	0.00753429	0.0797463	28.7567	55.0233	28.74	27.46	30.07	43.34	44.96	76.77
Mpst	-1.27607	0.151198	7.13683	0.00755165	0.0798467	1.47667	0.596667	1.17	1.23	2.03	0.96	0.67	0.16
Snhg9	0.885574	0.624231	7.13571	0.00755639	0.0798467	19.9133	37.23	21.85	19.15	18.74	36.46	45.38	29.85
Zfat	-0.917182	1.72968	7.13353	0.00756557	0.079877	1.07	0.61	1.01	1.27	0.93	0.72	0.76	0.35
Fgf14	-1.04041	1.81012	7.13014	0.00757987	0.0799077	1.47	0.79	1.82	1.33	1.26	1.32	0.7	0.35
Atp10a	-1.04987	4.97525	7.12985	0.0075811	0.0799077	8.97667	4.47	8.48	10.55	7.9	5.44	6.06	1.91
Csk	-0.83556	3.34452	7.12041	0.00762112	0.0802035	6.67	3.81	6.37	5.66	7.98	3.31	3.74	4.38
Elovl4	0.986431	2.65886	7.12024	0.00762183	0.0802035	1.73667	3.49333	2.12	1.83	1.26	3.36	5.12	2
Csnk1g2	-0.879284	6.15408	7.10825	0.00767302	0.080675	49.0567	27.2633	39.46	48.58	59.13	20.03	35.12	26.64
Tyms	0.867621	3.97488	7.10142	0.00770227	0.0809154	3.32	6.34667	3.52	3.49	2.95	5.29	5.26	8.49
Acot2	-0.804947	2.48764	7.09978	0.00770932	0.0809223	3.36	1.88667	3.93	3.21	2.94	2.19	2.03	1.44
Rcn1	-0.756115	7.88491	7.09749	0.0077192	0.0809588	119.7	72.7033	124.41	121.54	113.15	71.71	76.94	69.46
Nkx3-1	-1.24651	0.362712	7.09457	0.0077318	0.0810238	0.663333	0.28	0.96	0.38	0.65	0.09	0.5	0.25
BC037032	-0.954818	2.45148	7.09284	0.00773923	0.0810347	0.116667	0.0233333	0.15	0.1	0.1	0.05	0.02	0
Klk1	-1.58012	-0.0964942	7.07699	0.00780803	0.0816293	1.95667	0.693333	3.78	1.67	0.42	1.25	0.57	0.26
Prnd	-2.35854	-0.275238	7.07678	0.00780892	0.0816293	0.643333	0.163333	0.34	0.07	1.52	0.16	0	0.33
St3gal6	0.769624	6.41817	7.07315	0.00782476	0.0817274	46.63	81.6067	50.53	47.04	42.32	74.84	84.1	85.88
Cenpk	0.857874	0.91264	7.05324	0.0079122	0.0825726	1.20333	2.42667	1.25	1.08	1.28	2.56	2.66	2.06
Pcp4l1	1.68444	5.42172	7.04613	0.00794369	0.0828329	16.8867	54.4167	23.84	8.52	18.3	22.66	17.23	123.36
Upf1	-0.905062	5.25054	7.03671	0.00798558	0.0832012	12.3033	6.80667	11.3	12.49	13.12	7.11	9.31	4
Postn	-1.02792	7.16998	7.02139	0.00805417	0.0838468	74.87	37.6933	102.62	36.44	85.55	39.2	30.95	42.93
Rhpn2	-0.917091	6.75578	7.01008	0.0081052	0.0843087	49.5433	27.18	45.83	61.45	41.35	36.45	28.66	16.43
Unc5b	-1.20066	3.14661	7.00352	0.00813495	0.0845487	2.34333	1.06333	1.76	1.54	3.73	0.82	0.61	1.76
Pid1	-0.881826	3.88294	6.99061	0.00819384	0.0850909	8.89	4.85333	11.83	9.13	5.71	5.15	5.17	4.24
Panx1	1.02239	2.78523	6.98837	0.00820411	0.0851277	2.60333	5.64	2.33	2.25	3.23	2.75	6.92	7.25
Prkaca	-0.849717	5.60686	6.97991	0.00824296	0.0854608	33.25	18.8933	33.31	31.94	34.5	14.86	26.43	15.39
Cd9	0.838496	10.597	6.96913	0.00829276	0.0859067	1238.97	2258.42	1334.74	1160.75	1221.43	2000.18	1820.26	2954.82
Calm2	0.88089	9.12708	6.95628	0.00835256	0.0864097	442.067	830.973	452.25	402.5	471.45	713.92	629.14	1149.86
Card14	-0.835511	2.42993	6.95576	0.00835496	0.0864097	0.0533333	0.05	0.05	0.03	0.08	0.1	0.05	0
Heatr7a	-0.862175	4.81855	6.95327	0.00836663	0.0864598	7.21333	4.03	6.43	6.87	8.34	5.1	4.59	2.4
Scd1	-0.852495	5.25426	6.94954	0.00838409	0.0865695	11.9533	6.84	12.36	12.4	11.1	9.29	6.45	4.78
Hist1h2bn	0.896237	2.13424	6.94555	0.0084028	0.0866804	0.303333	0.116667	0.91	0	0	0	0.2	0.15
Zfp521	1.02198	5.54784	6.94433	0.00840852	0.0866804	5.88667	12.3567	5.56	7.31	4.79	14.35	17.11	5.61
Strbp	-0.7733	6.05409	6.94244	0.00841741	0.0867014	5.76667	3.48333	6.03	6.17	5.1	3.7	3.91	2.84
Hmmr	1.23535	2.71216	6.94061	0.00842602	0.0867178	0.883333	2.11667	1.02	0.47	1.16	1.98	3.54	0.83
Lck	0.847145	1.88668	6.93919	0.00843271	0.0867178	1.38667	2.73	1.33	1.73	1.1	3.03	2.55	2.61
Csdc2	-1.19606	2.81299	6.93307	0.00846164	0.0869024	4.89	2.13667	4.93	3.68	6.06	1.51	1.01	3.89
Ip6k2	0.836658	2.37713	6.93249	0.00846439	0.0869024	1.13	2.02333	1.03	1.3	1.06	1.73	2.39	1.95
Dbf4	0.855447	1.26111	6.91541	0.00854561	0.0876652	0.826667	1.58667	0.93	0.82	0.73	1.6	1.89	1.27
Man1c1	-0.851295	6.07617	6.90595	0.00859093	0.0879943	21.6533	12.3967	16.89	20.26	27.81	10.57	14.72	11.9
Dact3	-1.38	2.47293	6.90581	0.0085916	0.0879943	3.15667	1.16333	2.45	1.84	5.18	0.83	0.5	2.16
Crim1	-0.976991	7.50723	6.90236	0.00860821	0.0880932	46.1	23.9067	32.03	34.65	71.62	23.8	29.32	18.6
Antxr1	-0.790895	4.11336	6.88801	0.00867757	0.0887313	4.83	2.82	5	4.43	5.06	3.23	2.97	2.26
Gm10345	0.877776	2.95896	6.88025	0.00871534	0.0890456	1.79667	4.78	1.73	1.72	1.94	2.99	5.42	5.93
AI413582	0.980167	4.83208	6.8784	0.00872437	0.089066	44.96	90.0033	45.44	43.57	45.87	65.75	60.84	143.42
Ank	-0.761493	5.41803	6.87561	0.00873799	0.0891331	18.6967	11.44	20.16	18.56	17.37	10.95	13.31	10.06
Aatk	-1.05635	3.19841	6.87247	0.00875338	0.0892182	2.58667	1.29667	1.82	2.32	3.62	1.18	0.77	1.94
Anks6	-1.06084	1.28822	6.85421	0.00884325	0.0900617	0.866667	0.456667	0.78	0.75	1.07	0.74	0.42	0.21
Sel1l3	-1.54713	0.913099	6.84244	0.00890174	0.0905845	0.656667	0.22	0.69	0.27	1.01	0.18	0.02	0.46
Diap3	0.884999	0.458598	6.8338	0.00894488	0.0908843	0.226667	0.5	0.22	0.21	0.25	0.49	0.62	0.39
Eda2r	0.863098	2.04895	6.83366	0.00894556	0.0908843	1.13	2.48667	1.3	1.26	0.83	2.44	2.11	2.91
Mme	2.02273	1.97018	6.81589	0.00903505	0.0917199	0.403333	1.71	0.4	0.44	0.37	1.97	3.11	0.05
Vgll4	0.749628	5.0365	6.80858	0.0090721	0.0919732	21.62	37.7333	21.95	21.39	21.52	34.74	41.17	37.29
Dctpp1	0.864086	2.99594	6.8081	0.00907453	0.0919732	13.9967	25.8567	13.47	12.81	15.71	21.5	22.53	33.54
Ppp6r1	-0.811751	6.65222	6.80105	0.00911044	0.0922632	39.04	22.9867	34.17	38.33	44.62	20.77	29.55	18.64
Plod2	-0.98915	4.53636	6.79628	0.00913479	0.0924359	9.79333	4.99667	12.79	8.75	7.84	7	5.5	2.49
Fjx1	1.27393	1.61688	6.79225	0.00915544	0.0925546	0.913333	2.20667	0.76	0.42	1.56	1.15	2.04	3.43
C230081A13Rik	0.784656	4.40134	6.79114	0.00916114	0.0925546	1.59333	2.83	1.73	1.34	1.71	2.43	3.31	2.75
Ust	-1.07916	0.969314	6.77104	0.00926488	0.093528	0.703333	0.31	0.95	0.51	0.65	0.46	0.22	0.25
Wwc2	-0.818658	6.02566	6.76416	0.00930067	0.0938145	18.5333	10.8033	14.36	18.37	22.87	10.46	13.24	8.71
Atp1b3	0.763363	8.86558	6.75857	0.00932987	0.0940341	241.637	421.26	273.48	237.52	213.91	471.51	450.34	341.93
Sema6b	0.914875	3.13778	6.75127	0.00936809	0.0943442	1.58667	3.21	0.95	1.45	2.36	2.61	2.99	4.03
Ablim3	1.37848	2.74607	6.74726	0.00938917	0.0944813	0.93	2.48333	0.77	0.25	1.77	3.01	1.25	3.19
Gimap9	0.830262	4.17365	6.74386	0.00940711	0.0945867	11.6233	21.4533	12.24	12.09	10.54	16.93	20.6	26.83
Marcks	1.00351	5.52515	6.72933	0.00948403	0.0952844	8.52667	17.54	7.51	7.79	10.28	9.69	17.59	25.34
Gja1	1.16467	5.46217	6.72208	0.00952264	0.0955964	10.68	24.5033	11.77	5.81	14.46	17.09	15.66	40.76
Foxc2	-0.890358	6.27844	6.69919	0.00964569	0.096755	45.1233	24.7833	45.82	33.34	56.21	19.9	22.16	32.29
Bcl2	-0.769733	3.53528	6.68854	0.00970345	0.0972573	3.46333	2.29	3.28	3.64	3.47	2.67	2.28	1.92
Sytl5	-1.30755	1.61513	6.68124	0.00974329	0.0975794	1.70667	0.653333	1.78	1.94	1.4	0.82	0.96	0.18
Tek	-0.910738	10.5258	6.67419	0.00978188	0.0977465	496.387	274.01	496.52	598.8	393.84	346.74	320.9	154.39
Arhgef10	-0.778943	6.43067	6.67404	0.00978274	0.0977465	23.3467	14.1267	21.23	24.46	24.35	16.46	15.25	10.67
Ptgis	-0.738302	8.29143	6.67308	0.00978798	0.0977465	275.05	169.21	271.99	257.91	295.25	171.61	169.25	166.77
Rarres1	-1.34225	0.244512	6.67165	0.00979583	0.0977465	1.50333	0.566667	2.04	0.65	1.82	0.49	0.16	1.05
Spire2	1.25728	0.109247	6.67017	0.009804	0.0977465	0.273333	0.793333	0.19	0.18	0.45	0.58	1.49	0.31
Speg	-0.963852	2.49055	6.66975	0.00980631	0.0977465	4.83667	1.98667	5.98	2.92	5.61	1.62	1.59	2.75
Rassf8	-0.922964	1.26741	6.65511	0.00988716	0.0983758	1.66667	0.966667	2.31	1.34	1.35	0.86	1.06	0.98
2310057J16Rik	-0.882811	4.49662	6.65457	0.00989017	0.0983758	7.59	4.15333	6.98	7.67	8.12	4.16	5.88	2.42
Fn3k	-0.856395	2.04483	6.65411	0.00989276	0.0983758	5.49333	3.12333	5.44	4.95	6.09	3.6	3.21	2.56
Abi3bp	0.869226	5.0333	6.64816	0.00992583	0.0986272	5.46333	9.92	7.28	4.04	5.07	8.52	8.23	13.01
Mir3074-1	0.96779	0.581573	6.64333	0.00995278	0.0986964	2.74667	0	0	0	8.24	0	0	0
Tcfcp2l1	-1.29476	1.85023	6.64274	0.00995605	0.0986964	0.596667	0.27	0.77	0.68	0.34	0.51	0.22	0.08
Mmp28	-0.960756	3.6444	6.64272	0.00995618	0.0986964	7.01333	3.59667	7.73	4.23	9.08	4.31	4.61	1.87
Tmem191c	0.914426	1.47803	6.63306	0.0100103	0.0991555	0.896667	1.94667	0.78	0.91	1	1.15	2.25	2.44
Uchl3	0.969469	4.07784	6.62406	0.010061	0.0994557	16.5167	33.01	15.56	17.05	16.94	26.48	20.73	51.82
Fads1	-0.783098	6.33501	6.62345	0.0100645	0.0994557	35.78	21.5067	34.14	39.34	33.86	23.42	25.35	15.75
Prkar2a	-0.859888	5.08103	6.62269	0.0100687	0.0994557	12.5867	7.18333	11.35	13.01	13.4	7.67	9.55	4.33
Galnt10	-0.881741	5.80543	6.61999	0.0100841	0.0994557	18.1033	10.07	12.13	17.94	24.24	8.61	10.34	11.26
Tmed8	-0.797884	2.77876	6.61984	0.0100849	0.0994557	1.38667	0.786667	1.44	1.53	1.19	0.86	0.93	0.57
Prdm9	-0.973579	1.92754	6.61921	0.0100885	0.0994557	0.81	0.406667	0.8	0.75	0.88	0.43	0.3	0.49
Zfp366	1.13431	0.925705	6.61794	0.0100956	0.0994557	0.396667	1.02667	0.31	0.59	0.29	1.09	1.55	0.44
Dkk3	-0.859788	6.14468	6.61486	0.0101131	0.0995505	32.7867	18.56	38.63	31.2	28.53	19.14	12.76	23.78
Zfp518b	-0.964898	2.00703	6.60875	0.0101479	0.0998153	0.893333	0.496667	0.8	0.87	1.01	0.72	0.54	0.23
Racgap1	0.791233	3.51702	6.60551	0.0101664	0.0999192	3.22333	5.77667	3.12	2.7	3.85	4.89	6.16	6.28
Syce2	1.21903	1.90424	6.59707	0.0102147	0.100316	2.87	7.94	2.43	3.5	2.68	5.37	2.94	15.51
Coro2b	-0.898685	2.85031	6.59238	0.0102416	0.100459	2.57667	1.08667	2.03	2.16	3.54	0.73	1.12	1.41
4930471I20Rik	-0.915774	0.785601	6.59178	0.010245	0.100459	0.0166667	0	0	0.05	0	0	0	0
Zfp612	-0.924824	2.50918	6.5882	0.0102657	0.100495	1.74	0.973333	1.85	1.75	1.62	1.38	0.99	0.55
Ccdc136	0.80148	2.6545	6.58803	0.0102667	0.100495	1.51333	2.58667	1.32	1.52	1.7	2.49	3.12	2.15
Ly6i	0.766752	4.02052	6.58632	0.0102766	0.100495	0.503333	0.466667	0.77	0.37	0.37	0.57	0.57	0.26
Sgsm1	0.948588	2.33768	6.58506	0.0102838	0.100495	0.82	1.59	0.82	0.71	0.93	0.92	1.59	2.26
Smad1	0.902675	6.44277	6.58426	0.0102884	0.100495	24.1	45.66	23.55	25.61	23.14	29.93	41.5	65.55
Gadd45a	0.772559	3.45421	6.58116	0.0103064	0.100592	8.39667	14.8167	8.49	8.67	8.03	12.91	18.08	13.46
Kif18a	0.882136	1.67146	6.57736	0.0103284	0.100663	0.7	1.37667	0.85	0.73	0.52	0.85	1.74	1.54
Hist1h2bh	0.818072	1.64338	6.57667	0.0103324	0.100663	0	0.136667	0	0	0	0	0.41	0
Fignl1	0.839749	1.78611	6.5758	0.0103375	0.100663	1.03333	1.90333	0.91	0.83	1.36	1.69	2.15	1.87
D0H4S114	-0.78056	6.03607	6.56913	0.0103762	0.100963	49.0367	29.3033	49.49	41.64	55.98	29.36	25.59	32.96
Sox13	-0.77232	7.46142	6.56114	0.010423	0.101293	70.34	42.67	64.76	67.9	78.36	38.35	52.6	37.06
Cdkn1a	1.43222	6.62642	6.5606	0.0104261	0.101293	30.4933	86.52	19.27	16.27	55.94	50.51	40.33	168.72
Cacna2d3	1.15386	0.885651	6.55813	0.0104406	0.101356	0.243333	0.57	0.22	0.22	0.29	0.74	0.21	0.76
Gm17296	-1.11841	1.833	6.55221	0.0104754	0.101616	0.89	0.313333	1.01	1.04	0.62	0.51	0.38	0.05
Shmt1	1.11558	1.12645	6.54839	0.0104979	0.101708	0.61	1.63	0.46	0.92	0.45	0.56	2.32	2.01
Zfp354c	-0.96932	3.3484	6.54653	0.0105089	0.101708	2.97667	1.56667	3.27	3.65	2.01	2.37	1.27	1.06
Ptch1	-1.16329	2.69177	6.5465	0.0105091	0.101708	1.97667	0.83	1.66	2.67	1.6	1.3	1.06	0.13
Zfp106	-0.773643	6.3904	6.53405	0.0105829	0.102344	13.2367	7.87333	10.95	15.5	13.26	9.12	7.92	6.58
Aff3	-1.47325	1.5541	6.53004	0.0106068	0.102466	0.776667	0.26	0.91	0.84	0.58	0.38	0.37	0.03
Sun2	-0.894395	3.09809	6.52922	0.0106117	0.102466	3.15333	1.66333	2.48	2.27	4.71	1.95	1.57	1.47
Ccl7	2.34862	-0.876379	6.5141	0.0107023	0.103262	0.2	1.70667	0.25	0.24	0.11	0.88	0	4.24
Hoxa10	-0.737244	4.61504	6.50903	0.0107328	0.103478	16.2733	10.0067	15.69	16.12	17.01	9.74	10.69	9.59
Gnptab	-0.981313	5.2289	6.50476	0.0107586	0.103621	11.0633	5.80667	10.68	13.19	9.32	7.29	7.48	2.65
Mapkapk2	-0.790961	6.31248	6.50387	0.010764	0.103621	48.12	28.5567	40.64	47	56.72	25.57	35.3	24.8
March8	-0.751613	5.94166	6.49765	0.0108017	0.103905	20.36	12.44	18.77	20.91	21.4	12.34	14.63	10.35
Cyb5	0.877196	8.51768	6.4764	0.0109316	0.105075	517.237	959.63	533.8	502.15	515.76	851.82	656.77	1370.3
Rgmb	-0.751575	5.83725	6.47416	0.0109454	0.105096	31.15	19.5067	31.82	32.17	29.46	18.77	23.57	16.18
Gaa	-0.806264	8.15237	6.47335	0.0109504	0.105096	115.737	68.24	90.13	105.29	151.79	66.85	67.72	70.15
Mki67	1.07998	3.28895	6.46984	0.0109721	0.10516	0.666667	1.50667	0.86	0.42	0.72	1.48	2.38	0.66
Gata4	-0.869727	0.772388	6.46956	0.0109737	0.10516	0.73	0.423333	0.8	0.76	0.63	0.55	0.39	0.33
Fkbp14	-0.735831	5.32657	6.46782	0.0109845	0.105184	23.54	14.4933	25.87	23.15	21.6	14.52	16.12	12.84
Hs1bp3	-0.792473	3.63269	6.46607	0.0109953	0.105208	6.21	3.69667	5.01	5.95	7.67	4.29	3.44	3.36
Stxbp5	-0.910758	5.05866	6.4585	0.0110423	0.105577	5.20667	2.88333	5.16	6.55	3.91	3.56	3.45	1.64
Clec11a	-1.10398	2.68989	6.45588	0.0110586	0.105653	5.57333	2.62333	5.86	4.12	6.74	3.13	1.02	3.72
Gm16516	0.867741	1.25634	6.45293	0.011077	0.105691	1.67667	3.21	2.39	1.59	1.05	3.52	2.64	3.47
Ank1	-0.876223	0.834761	6.45256	0.0110793	0.105691	0.163333	0.0866667	0.2	0.18	0.11	0.1	0.09	0.07
Obscn	-0.750896	5.16367	6.45053	0.0110919	0.105732	1.88	1.14333	2.03	1.92	1.69	1.18	0.94	1.31
Rnmtl1	0.832072	2.84369	6.44682	0.0111151	0.105874	4.16667	7.75333	5.4	3.45	3.65	7.1	6.08	10.08
Rad51	0.805942	1.8302	6.44177	0.0111468	0.106095	1.43333	2.61	1.54	1.29	1.47	2.14	3.42	2.27
Des	-1.30858	3.17541	6.43296	0.0112022	0.106471	7.34	2.97667	7.99	3.08	10.95	3.51	1.11	4.31
Med24	-0.752896	6.18647	6.43281	0.0112031	0.106471	31.1667	18.93	26.9	30.72	35.88	21.15	17.84	17.8
Vipr2	-0.949076	5.11395	6.43144	0.0112118	0.106474	16.05	8.55667	17.56	20.59	10	10.42	10.44	4.81
Rnf217	-0.795731	4.26843	6.42485	0.0112534	0.106789	10.1533	5.96333	9.87	9.93	10.66	4.41	7.54	5.94
Nfil3	0.93477	3.91501	6.42225	0.01127	0.106866	6.59	12.8567	5.94	4.77	9.06	8.21	15.3	15.06
Mcts2	0.855667	1.85622	6.41369	0.0113244	0.107302	4.39667	8.62	4.57	5.21	3.41	8.7	6.45	10.71
Foxc1	-0.831342	6.16807	6.40935	0.0113521	0.107484	27.73	16.15	23	24.5	35.69	13.47	20.56	14.42
Cacnb2	-1.2924	0.932111	6.40722	0.0113657	0.107533	0.92	0.316667	1.37	0.61	0.78	0.56	0.29	0.1
Rassf7	0.869738	2.14837	6.40554	0.0113765	0.107533	2.40667	4.62667	2.27	2.19	2.76	4.22	3.23	6.43
Prkaa2	-0.812496	3.12011	6.40344	0.01139	0.107533	1.55	0.893333	1.55	1.49	1.61	1.24	0.72	0.72
Tgfbi	1.03029	5.09442	6.40323	0.0113913	0.107533	10.1733	21.08	13.33	8.26	8.93	15.74	13.09	34.41
Mpv17l	-0.926041	1.56943	6.39097	0.0114702	0.108198	1.49333	0.81	1.73	1.05	1.7	1.16	0.68	0.59
Abat	-0.819669	4.40091	6.37071	0.0116019	0.109288	6.95667	4.04667	6.74	6.67	7.46	4.9	4.7	2.54
Asb2	-1.23274	2.70443	6.37054	0.011603	0.109288	3.81333	1.62333	4.14	1.65	5.65	0.94	1.06	2.87
Rcor2	-0.901197	1.26812	6.36851	0.0116163	0.109332	1.45	0.873333	1.63	1.22	1.5	0.57	0.91	1.14
Prkar2b	0.830367	1.90655	6.36046	0.0116691	0.109747	0.933333	1.79	1.26	0.87	0.67	2.01	1.77	1.59
Gab2	-0.859234	5.63543	6.35882	0.0116799	0.109767	12.3933	6.9	11.25	13.52	12.41	7.53	9.22	3.95
Paqr8	-1.15193	4.01866	6.34792	0.0117519	0.110361	5.81667	2.74	5.87	6.47	5.11	4.36	3.06	0.8
Map3k8	0.811922	4.54071	6.34401	0.0117779	0.110523	7.99667	14.56	8.28	8.01	7.7	10.52	19.98	13.18
Dapk2	1.20757	4.61411	6.3418	0.0117925	0.110579	9.75667	23.2567	7.7	6.67	14.9	13.07	15.66	41.04
Pcolce	-0.74944	4.54095	6.33935	0.0118088	0.11065	23.3	14.2233	23.58	21.26	25.06	15.25	12.22	15.2
Asb1	-0.820111	2.98408	6.33601	0.0118311	0.110777	2.05667	1.19	1.41	2.38	2.38	1.09	1.41	1.07
Tbx18	-0.744143	3.74999	6.32689	0.0118921	0.111265	4.29	2.60333	4.18	4.36	4.33	2.78	2.28	2.75
Psmc3ip	0.852109	2.1166	6.32213	0.011924	0.11148	2.5	6.06667	2.92	2.18	2.4	4.61	4.68	8.91
Maml3	0.831091	1.0029	6.32085	0.0119327	0.11148	0.233333	0.436667	0.22	0.28	0.2	0.56	0.4	0.35
Zbp1	0.993906	2.85394	6.31822	0.0119504	0.11152	6.69	14.8767	7.57	9.02	3.48	12.46	11.01	21.16
Snhg3	0.78683	3.8903	6.31759	0.0119546	0.11152	43.7533	80.1167	53.74	43.6	33.92	87.72	87.3	65.33
Kirrel	-0.798735	4.67482	6.30121	0.0120656	0.112299	4.9	2.73	4.05	4.86	5.79	3.57	2.46	2.16
Phactr1	-0.86657	5.96437	6.30107	0.0120665	0.112299	16.4033	9.20333	16.38	19.82	13.01	11.85	10.17	5.59
Prc1	0.979735	4.31252	6.30083	0.0120682	0.112299	5.21667	10.75	5.49	3.66	6.5	9.34	16.79	6.12
Ahcyl2	-1.00871	4.77643	6.29939	0.012078	0.112299	8.56667	4.37667	7.82	10.86	7.02	6.18	5.16	1.79
Thrsp	1.54659	1.13146	6.29762	0.01209	0.112299	1.42	4.1	1.27	0.15	2.84	3.13	3.87	5.3
Pinx1	0.774895	2.35805	6.29744	0.0120913	0.112299	3.17667	5.05	3.45	2.75	3.33	4.53	5.09	5.53
Taf1d	0.752293	3.90372	6.29478	0.0121094	0.112385	8.83333	16.16	9.64	8.85	8.01	17.33	15.63	15.52
Serpina3n	1.2344	2.17893	6.29196	0.0121287	0.11243	1.41	3.51667	1.17	0.71	2.35	1.53	2.29	6.73
Tnfsf9	0.822848	1.46951	6.29104	0.012135	0.11243	2.08667	3.89	1.81	1.85	2.6	4.29	3.3	4.08
1110067D22Rik	-0.766201	4.52557	6.29017	0.0121409	0.11243	9.87667	5.84667	11.08	8.56	9.99	6.19	7.04	4.31
Glis2	-0.818381	4.01254	6.28705	0.0121623	0.112523	6.56333	3.92	5.81	6.32	7.56	4.43	4.85	2.48
Ndufs8	0.867744	6.47366	6.28523	0.0121748	0.112523	81.8333	152.723	84.49	75.59	85.42	131.75	106.79	219.63
0610007L01Rik	-0.750539	6.66975	6.28482	0.0121777	0.112523	42.48	25.67	44.74	43.66	39.04	22.59	32.21	22.21
Ntrk3	-0.886211	1.94689	6.27463	0.0122478	0.113089	1.60333	0.876667	2	1.17	1.64	0.72	0.7	1.21
Gyk	-0.80109	2.97053	6.27142	0.0122701	0.113147	2.54	1.49667	3.05	1.9	2.67	1.7	1.39	1.4
Plekhb1	1.08177	3.3109	6.27115	0.0122719	0.113147	4.41667	9.62333	4.74	4.62	3.89	8.84	4.02	16.01
Tubb4	-1.01414	1.28831	6.26348	0.0123252	0.113555	1.72	0.783333	2.24	1.03	1.89	0.58	0.57	1.2
Gm5972	0.874027	1.90372	6.25771	0.0123654	0.113843	0.433333	0.75	0.38	0.42	0.5	0.65	0.66	0.94
Pgr	-0.993383	0.732873	6.25339	0.0123956	0.113997	0.35	0.176667	0.37	0.24	0.44	0.2	0.09	0.24
St3gal5	-0.765853	6.78009	6.25273	0.0124002	0.113997	76.9267	46.0833	69.94	67.42	93.42	47.25	40.91	50.09
Smo	-0.783005	5.03747	6.24601	0.0124473	0.114347	12.3733	7.37	10.49	10.72	15.91	7.07	7.57	7.47
Dlgap5	0.818372	1.05923	6.24126	0.0124807	0.11456	0.543333	0.99	0.65	0.43	0.55	0.95	1.02	1
Bmpr1b	-1.85985	0.654942	6.23845	0.0125006	0.11456	0.526667	0.126667	0.83	0.22	0.53	0.19	0.19	0
Amy1	-0.864323	3.01885	6.23817	0.0125025	0.11456	7.64333	4.29667	8.26	9.5	5.17	5.34	4.57	2.98
Lpcat1	-0.860112	4.49194	6.23759	0.0125067	0.11456	18.7833	10.9467	19.76	19.17	17.42	13.21	13.45	6.18
Prkcz	0.815664	4.05483	6.2336	0.0125349	0.114639	3.26333	5.86	3.28	3.34	3.17	5.01	4.86	7.71
Casz1	0.809533	1.53884	6.23329	0.012537	0.114639	0.28	0.423333	0.26	0.3	0.28	0.47	0.38	0.42
Mex3b	0.892848	0.653569	6.23225	0.0125444	0.114639	0.376667	0.73	0.39	0.49	0.25	0.63	0.63	0.93
Nwd1	-1.63522	0.805114	6.23125	0.0125515	0.114639	0.32	0.0933333	0.35	0.37	0.24	0.1	0.18	0
Ccdc85a	-1.00704	0.456452	6.22261	0.0126129	0.115117	0.416667	0.27	0.45	0.29	0.51	0.44	0.13	0.24
Krt80	-0.828753	7.24862	6.22034	0.0126291	0.115181	101.817	58.38	75.54	94.94	134.97	70.04	49.38	55.72
6230427J02Rik	0.772326	4.16972	6.21591	0.0126607	0.115386	17.74	30.7167	19.06	18.01	16.15	25.39	29.14	37.62
D030028A08Rik	0.953235	1.67514	6.21437	0.0126718	0.115404	0.666667	1.38333	0.51	0.76	0.73	1.44	0.73	1.98
Slit3	-0.803689	2.35231	6.20948	0.0127068	0.11564	1.38333	0.76	1.58	1.13	1.44	0.74	0.95	0.59
Kctd3	-0.765604	3.87714	6.20677	0.0127262	0.115734	5.88	3.53	5.56	5.37	6.71	3.28	4.42	2.89
Ppp1r3d	-0.779446	2.9486	6.19953	0.0127784	0.116125	3.51667	2.15	3.79	3.03	3.73	2.39	2.52	1.54
Icmt	-0.859835	4.88207	6.19453	0.0128146	0.11637	9.2	5.18333	8.33	10	9.27	5.86	6.89	2.8
Tnpo2	-0.814496	3.82724	6.19226	0.0128311	0.116402	4.09	2.24667	3.04	3.83	5.4	2.72	2.18	1.84
Mras	0.749753	5.27878	6.19151	0.0128365	0.116402	8.53	14.6233	10.21	7.68	7.7	16.67	15.49	11.71
2010111I01Rik	0.720612	6.82763	6.18954	0.0128507	0.116448	19.7067	35.38	21.8	20.07	17.25	32.56	39.78	33.8
Gpatch4	0.764208	3.5661	6.18739	0.0128664	0.116506	6.16333	10.5067	7.54	5.06	5.89	9.51	9.93	12.08
Hey2	-0.909578	7.25595	6.18216	0.0129045	0.116768	96.9133	53.46	108.41	108.3	74.03	71.92	60.99	27.47
2810008D09Rik	0.813664	4.46265	6.1804	0.0129173	0.1168	44.5433	76.38	54.76	50.29	28.58	66.06	78.28	84.8
Cfi	-1.13512	0.59909	6.17899	0.0129276	0.11681	1.07	0.493333	0.96	1.21	1.04	0.59	0.75	0.14
Iqgap3	1.02198	1.49862	6.1758	0.0129509	0.116917	0.31	0.68	0.12	0.23	0.58	0.64	1.03	0.37
Ptger1	-0.786286	4.38678	6.17484	0.0129579	0.116917	8.68333	5.16667	8.56	7.34	10.15	5.58	6.23	3.69
3110003A17Rik	0.739868	4.69668	6.17182	0.0129801	0.117033	36.6033	62.3367	36.64	34.35	38.82	62.21	55.03	69.77
Tmem51	0.729609	4.75919	6.17032	0.0129911	0.117049	13.3333	22.9067	13.67	14.32	12.01	21.9	21.4	25.42
Hsd3b7	0.813245	7.5943	6.16761	0.013011	0.117145	95.1	170.76	96.15	95.18	93.97	127.01	153.85	231.42
Tspan13	0.757894	7.74634	6.15939	0.0130716	0.117608	104	180.34	113.05	117.35	81.6	152.9	199.42	188.7
Gnaq	-0.786813	6.80396	6.14702	0.0131634	0.118293	28.6867	17.25	24.23	28.01	33.82	19.12	20.27	12.36
Tmem184b	-0.769704	8.32693	6.14659	0.0131665	0.118293	137.913	84.6467	112.99	136.25	164.5	98.16	89.71	66.07
S100a6	0.796251	8.03165	6.13748	0.0132346	0.11882	424.18	743.427	413.79	350.45	508.3	782.12	569.46	878.7
Thyn1	0.762415	4.08753	6.13565	0.0132483	0.118859	13.46	25.2067	14.29	13.36	12.73	23.25	19.18	33.19
Nrxn3	1.04174	1.30662	6.13428	0.0132585	0.118867	0.166667	0.393333	0.18	0.24	0.08	0.44	0.27	0.47
Mrrf	0.748483	4.99595	6.12733	0.0133107	0.11925	11.1933	19.85	12.05	10	11.53	15.61	21.4	22.54
Art4	-0.727863	6.21438	6.12553	0.0133244	0.119288	45.81	28.7367	43.19	45.11	49.13	26.61	33.88	25.72
Mir24-1	0.919192	0.44484	6.1176	0.0133842	0.119717	0	0	0	0	0	0	0	0
Rtp4	0.734987	6.19066	6.11668	0.0133912	0.119717	46.1767	78.5733	47.76	51.04	39.73	78.47	70.57	86.68
Rbpms2	-0.7961	3.22179	6.11184	0.0134279	0.11996	7.03	4.21	8	5.34	7.75	3.98	3.7	4.95
Fstl3	-0.97878	3.77092	6.10474	0.013482	0.120359	11.3967	5.76333	11.76	6.06	16.37	5.52	4.29	7.48
Nebl	1.05416	3.29092	6.10328	0.0134931	0.120373	2.19333	4.89667	2.19	3.21	1.18	5.89	6.49	2.31
9030418K01Rik	-0.775465	2.94784	6.10029	0.013516	0.120438	5.31333	3.10333	4.78	4.94	6.22	2.73	3.81	2.77
Nudt4	0.809595	7.82142	6.09984	0.0135195	0.120438	62.12	112.55	72.87	54.41	59.08	101.2	156.89	79.56
2210404O07Rik	0.977452	1.27517	6.09315	0.0135707	0.12081	2.05667	3.97667	2.04	2.41	1.72	4.38	5.74	1.81
Npnt	-0.80478	7.15583	6.08992	0.0135955	0.120946	57.29	34.51	63.85	39.49	68.53	39.89	35.9	27.74
Pim1	-0.86706	2.65526	6.08743	0.0136147	0.121031	5	2.62667	5.36	2.66	6.98	2.81	2.69	2.38
Abcg3	-0.956078	4.1162	6.08609	0.0136251	0.121038	8.91	4.82	10.69	8.77	7.27	6.49	5.85	2.12
Smc4	0.705663	6.52382	6.08302	0.0136487	0.121095	19.36	33.0367	20.48	19.71	17.89	31.66	35.21	32.24
Tril	1.45949	1.93322	6.08279	0.0136505	0.121095	0.42	1.23	0.43	0.25	0.58	0.78	0.33	2.58
Klhl21	-0.799463	4.98172	6.0807	0.0136667	0.121153	12.1133	7.22333	10.54	11.16	14.64	5.66	9.37	6.64
Adamts10	-0.788456	7.65523	6.07753	0.0136912	0.121286	61.2967	36.0133	54.06	67.6	62.23	43.5	41.03	23.51
Gata6	-0.737536	7.24203	6.07199	0.0137342	0.121581	67.7367	41.2767	65.73	58.95	78.53	36.45	45.72	41.66
Chpf	-1.14433	3.37185	6.0697	0.013752	0.121598	5.42333	2.50667	5.87	3.26	7.14	1.54	1.43	4.55
Optc	-1.37878	-0.0465784	6.06818	0.0137638	0.121598	0.886667	0.32	0.69	0.53	1.44	0.35	0.02	0.59
Gm10069	0.838345	1.2695	6.06805	0.0137649	0.121598	0.206667	0.323333	0.18	0.13	0.31	0.17	0.27	0.53
Klf15	-0.936389	4.97123	6.06655	0.0137766	0.121617	22.3233	11.9767	17.27	21.38	28.32	6.91	12.34	16.68
Xaf1	0.760917	5.97432	6.06426	0.0137944	0.121689	19.6133	33.9233	21	21.05	16.79	31.66	28.48	41.63
Serpina3h	0.918247	0.863389	6.05975	0.0138297	0.121915	0.0633333	0.17	0.02	0.05	0.12	0.42	0.07	0.02
Tmem37	0.826878	1.26512	6.05533	0.0138644	0.122136	2.38	4.21333	2.16	2.1	2.88	3.38	5.35	3.91
Prss35	-1.19877	0.900666	6.05114	0.0138973	0.122341	1.24	0.556667	1.44	1.21	1.07	1	0.14	0.53
Nt5c	0.765241	4.87137	6.04638	0.0139349	0.122586	32.5233	55.9567	31.94	30.77	34.86	48.6	47.75	71.52
Sympk	-0.934445	3.4569	6.04178	0.0139712	0.12282	3.91333	2.07	2.49	4.16	5.09	2.99	1.79	1.43
Lmna	0.902371	8.5206	6.03834	0.0139984	0.122974	115.64	224.18	102.14	94.82	149.96	147.53	203.93	321.08
Rgs11	-0.952559	2.28084	6.02756	0.0140842	0.123558	2.49	1.37333	2.58	2.63	2.26	2.28	1.15	0.69
C1qtnf1	-0.857448	5.98827	6.02753	0.0140844	0.123558	18.58	10.71	17.76	20.81	17.17	13.72	12.19	6.22
2810025M15Rik	0.732953	4.66008	6.0202	0.014143	0.123987	21.3867	36.3367	22.43	22.13	19.6	32.64	33.71	42.66
Dio2	-1.00799	1.11327	6.0175	0.0141647	0.124062	0.583333	0.3	0.72	0.53	0.5	0.43	0.36	0.11
Sema5b	1.02411	0.246908	6.01669	0.0141712	0.124062	0.0266667	0.19	0.01	0.03	0.04	0.17	0.4	0
Bola1	0.808523	3.41842	6.00978	0.0142268	0.124462	13.7867	26.1667	15.31	14.2	11.85	23.45	19.38	35.67
Stk11	-0.831032	5.03141	6.00741	0.0142459	0.124544	29.8567	16.5933	29.05	19.78	40.74	14.96	20.24	14.58
Cdk16	-0.75247	6.87984	6.00617	0.0142559	0.124545	56.1267	33.8133	49.74	52.67	65.97	29.91	41.72	29.81
Fmo3	-1.10318	4.07684	6.00312	0.0142806	0.124674	13.6467	6.18333	11.29	9.82	19.83	3.82	3.61	11.12
Fkbp1b	0.762572	3.49779	5.99093	0.0143796	0.125383	11.9133	20.8	12.33	11.29	12.12	19.66	17.14	25.6
Igfbp7	-1.037	8.38559	5.9907	0.0143815	0.125383	534.873	261.823	598.43	322.8	683.39	159.97	203.45	422.05
Ctnnal1	0.789344	6.32163	5.98389	0.0144372	0.125781	19.0433	34.0867	20.29	21.24	15.6	31.55	45.67	25.04
Mest	0.788099	2.92385	5.98023	0.0144671	0.125956	2.42333	4.64667	3.07	1.85	2.35	4.79	5.27	3.88
Fbxo5	0.749733	2.61355	5.97578	0.0145037	0.126084	2.81667	4.88667	2.38	3.1	2.97	4.23	5.62	4.81
Gnai1	-0.830237	3.79546	5.97568	0.0145045	0.126084	6.85	3.93667	8.58	4.7	7.27	3.04	4.23	4.54
Pak4	-0.713005	5.89195	5.97479	0.0145118	0.126084	28.58	18.3	27.17	28.5	30.07	18.04	16.79	20.07
Cyp4b1	0.741255	8.55045	5.97358	0.0145218	0.126085	174.79	303.887	207.04	159.74	157.59	315.33	358.8	237.53
Lamb2	-0.783691	8.73481	5.96049	0.01463	0.126929	110.937	66.5133	82.1	103.31	147.4	65.96	71.75	61.83
Reep1	1.0772	2.21485	5.9594	0.0146391	0.126929	0.893333	1.97333	1.09	0.5	1.09	1.19	1.35	3.38
Gan	-0.859284	2.32292	5.95634	0.0146645	0.127062	2.68333	1.58667	2.08	2.28	3.69	1.31	2.13	1.32
Pnldc1	-1.31174	0.327013	5.95058	0.0147125	0.127391	0.87	0.306667	1.24	0.41	0.96	0.44	0	0.48
Immp2l	0.890604	1.73555	5.94238	0.014781	0.127897	2.66667	4.78333	3.33	2.72	1.95	4.17	3.19	6.99
Adamtsl4	-0.786228	6.11421	5.92774	0.0149043	0.128875	25.7767	15.3233	20.48	23.34	33.51	17.35	12.54	16.08
Zdhhc8	-0.783438	4.81909	5.92447	0.014932	0.129027	8.16333	4.88667	7.53	6.63	10.33	4.87	5.93	3.86
Atp2a2	-0.757033	7.01857	5.91438	0.0150178	0.129556	40.22	23.4067	34.87	38.33	47.46	21.43	30.86	17.93
Fam40b	-1.11563	1.82457	5.91386	0.0150222	0.129556	1	0.473333	0.71	1.69	0.6	0.64	0.57	0.21
Igfbp3	1.31883	4.30578	5.91366	0.0150239	0.129556	5.73	14.8033	3.29	2.12	11.78	8.67	17.11	18.63
Trim62	-0.787409	5.16773	5.90275	0.0151173	0.130272	17.2867	10.2367	14.64	16.59	20.63	7.6	12.2	10.91
Gt(ROSA)26Sor	0.713999	6.12674	5.90016	0.0151395	0.130375	60.7333	106.45	67.83	66.08	48.29	112.42	99.95	106.98
Mthfr	-0.745797	4.56438	5.89752	0.0151623	0.130482	5.36333	3.4	4.34	5.43	6.32	4.15	2.92	3.13
Mtus2	-1.12191	2.86117	5.88443	0.0152754	0.131366	1.40333	0.63	1.8	0.7	1.71	0.77	0.26	0.86
Ece1	-0.828925	10.0125	5.8725	0.0153792	0.132169	318.03	186.427	262.14	374.39	317.56	237.73	210.21	111.34
Mink1	-0.767723	4.16232	5.8644	0.0154501	0.13267	5.03667	2.97333	5.26	5.14	4.71	3.81	3.16	1.95
Tax1bp3	0.830721	7.15723	5.86322	0.0154605	0.13267	97.6433	177.287	96.54	84.93	111.46	144.39	137.18	250.29
Ccdc109b	0.717711	4.42949	5.86226	0.0154689	0.13267	15.9	26.7067	16.3	17.89	13.51	25.73	25.44	28.95
Vps36	0.759469	5.56797	5.86035	0.0154857	0.132724	32.14	56.2833	33.77	28.07	34.58	51.94	45.83	71.08
Cdh6	-1.18729	0.649749	5.8477	0.0155974	0.133591	0.866667	0.4	0.84	0.57	1.19	0.6	0.48	0.12
5430416N02Rik	0.770823	1.84508	5.8435	0.0156347	0.13382	5.64667	10.6567	5.44	5.09	6.41	13.11	8.84	10.02
Fads2	-0.828805	5.54265	5.83948	0.0156705	0.134035	45.87	26.7367	50.8	44.25	42.56	39.59	24.04	16.58
Gm6788	0.754333	6.03609	5.83495	0.0157108	0.13429	2.23333	5.37	2.62	2.25	1.83	5.65	4.16	6.3
Prss57	-0.935672	3.50712	5.83209	0.0157364	0.134418	0.0133333	0.04	0	0.02	0.02	0.03	0	0.09
Traf1	0.763809	4.69784	5.82723	0.0157799	0.134699	8.1	13.9667	7.66	8.33	8.31	10.07	19.2	12.63
Itpk1	0.793875	4.23451	5.8011	0.0160162	0.136623	5.59667	10.0933	5.58	4.73	6.48	7.51	9.85	12.92
Ctif	-0.846784	2.60071	5.7982	0.0160426	0.136756	1.40333	0.793333	1.09	1.08	2.04	0.7	0.7	0.98
Ablim1	-0.869372	8.74498	5.79435	0.0160777	0.136921	100.333	57.3833	92.46	108.53	100.01	77.11	65.63	29.41
Rasl10a	0.986228	1.78617	5.79372	0.0160835	0.136921	1.55333	4.19667	1.66	1.59	1.41	2.73	2.93	6.93
Fxn	0.916005	2.03535	5.79073	0.0161109	0.137002	3.15667	5.96333	3.89	2.29	3.29	4.99	3.76	9.14
Boc	-0.845475	5.86971	5.79032	0.0161147	0.137002	19.57	11.4267	18.6	23.37	16.74	16.34	10.86	7.08
5430405H02Rik	0.748812	2.99635	5.78834	0.0161328	0.137008	4.18667	7.00333	4.77	3.56	4.23	5.66	6.21	9.14
4833419F23Rik	0.992576	0.361193	5.78787	0.0161371	0.137008	1.06667	2.16	1.14	1.09	0.97	1.55	0.99	3.94
Dsp	-0.877984	1.91395	5.77863	0.0162222	0.137639	0.563333	0.303333	0.61	0.34	0.74	0.37	0.22	0.32
Aven	-0.763437	4.21667	5.77082	0.0162944	0.138159	23.4433	14.42	22.89	22.88	24.56	10.5	16.85	15.91
Steap3	-0.732545	4.96257	5.7681	0.0163197	0.13828	16.9767	10.7867	16.62	17.28	17.03	13.43	11	7.93
Sidt2	-0.802681	6.75724	5.76369	0.0163607	0.138535	36.9333	21.9633	33.58	38.49	38.73	21.87	30.24	13.78
Fah	0.862012	4.12757	5.7554	0.016438	0.139097	9.78667	17.9	9.2	9.51	10.65	13.66	13	27.04
Peg3	-0.76631	4.0059	5.75067	0.0164824	0.139379	3	1.76333	2.53	3.39	3.08	2.06	2.05	1.18
Utp14b	0.741916	2.13528	5.74151	0.0165685	0.140014	0.376667	0.843333	0.38	0.39	0.36	0.62	1.49	0.42
Fgfr3	-0.794397	7.12671	5.73975	0.0165852	0.140061	51.66	31.1633	51.18	56.81	46.99	39.08	35.85	18.56
Tns1	-0.734669	7.70868	5.73857	0.0165963	0.140062	29.28	18.2	29.4	26.18	32.26	23.12	17.03	14.45
Pfdn1	0.758062	6.01959	5.73347	0.0166445	0.140375	57.1167	98.0033	56.74	58.48	56.13	85.39	81.43	127.19
[truncated: 11,158 more rows]

## Sheet: S1pr1-ECKO.edgeR.output
List of genes from WT vs S1PR1-ECKO FACS sorted MAECs. EdgeR cutoff of CPM>1 in at least 2 out of 3 replicates. The FPKM each gene is presented for all samples analyzed.								Males	Males	Males	Males	Males	Males
[truncated: 12,411 more rows]

[truncated: 1 more sheets: GFP-ECKO_Intersec]
