# Supplementary material for: Sphingosine 1-phosphate-regulated transcriptomes in heterogenous arterial and lymphatic endothelium of the aorta
Source: eLife. 2020 Feb 24;9:e52690. doi: 10.7554/eLife.52690 (PMC7054001; doi:10.7554/eLife.52690)
Supplement: Supplementary file 2. [file elife-52690-supp2.xlsx]

## Sheet: GFP.IPA
Results from IPA analysis on GFPhigh vs GFPlow bulk RNAseq performed on FACS sorted MAECS . Data presented in Figure 1D.
Upstream Regulator	Expr Log Ratio	Molecule Type	Predicted Activation State	Activation z-score	p-value of overlap	Target molecules in dataset	Mechanistic Network
TGFB1	0.099	growth factor		-1.65	4.01e-47	AASS,ABCG2,ABL1,ABLIM3,ACE,ACPP,ACTA2,ACTC1,ACTG2,ACTN1,ADAM12,ADAMTS2,ADAMTS4,ADM,ADRA2A,AGR2,ALOX12,AMY2B,ANGPTL4,ANKH,ANXA8/ANXA8L1,AOPEP,AQP1,ARHGEF19,ARL4A,ASNS,ASPM,ASS1,AXL,BCL2,BGN,BIRC5,BMP1,BMP2,BMP6,BUB1,C1R,CADM1,Calm1 (includes others),Ccl2,CCL5,Ccl7,CCNB1,CCNB2,CD36,CD68,CDC20,CDH5,CDK1,CDKN1A,CDKN3,CELSR2,CENPA,CENPE,CENPF,Ces2c,Ces2e,CFB,CFI,CHST8,CKS2,CLCA2,CNN1,COL16A1,COL1A1,CO…	803 (22)
TP53	0.44	transcription regulator		-1.923	3.82e-37	ABAT,ABCA2,ABCB1,ABCG2,ACE,ACOT11,ACTA2,ACTN1,ADA,ADAM12,ADAMTSL4,ADRB2,AEN,AK4,AKAP12,ANK1,ANKH,ANTXR1,ANXA1,ANXA8/ANXA8L1,ASF1B,ASNS,ASPM,ASS1,ATP1A1,AURKA,AURKB,BCL2,BID,BIK,BIRC5,BMP1,BOK,BRCA1,BUB1,CA9,Ccl2,CCL5,CCNB1,CCNB2,CD36,CDC20,CDK1,CDKN1A,CDKN3,CELSR1,CENPA,CENPE,CENPF,CEP55,CKAP2,CKS2,CLCA2,CMBL,CNN1,COL1A1,COL1A2,COL3A1,COL4A1,COL6A2,COL9A1,CSK,CSTB,CTIF,CTSF,CXCL3,Cyb5r3,CYFIP2,CY…	752 (24)
ERBB2	-0.747	kinase	Activated	3.047	1.18e-35	ABCG2,ABL1,ACTA2,ADAM12,ADAMTS5,AGR2,ANGPT2,ANGPTL4,ASPM,ATP1B3,AURKA,BCL2,BIRC5,BMP1,BUB1,CADM1,CCL5,Ccl7,CCNB1,CCNB2,CD36,CD9,CDC20,CDC42EP2,CDCA2,CDCA3,CDCA5,CDCA7,CDCA8,CDK1,CDKN1A,CDKN3,CENPA,CENPE,CENPF,CHST10,CKS2,CLEC11A,CLEC3B,COL1A1,COL3A1,COL4A1,COL5A1,COL6A1,COL6A2,COL6A3,CRIP1,CXCL3,CYP4B1,DAG1,DHFR,DPT,DTX1,EGFR,EIF4EBP1,ELK3,EPHX2,ERBB2,EREG,ETV1,FASN,FBLN2,FLT1,FN1,FRRS1,FSCN1,FST…	712 (19)
beta-estradiol		chemical - endogenous mammalian		1.588	1.75e-35	A4GALT,ABCB1,ABCG2,ABLIM1,ACE,ACPP,ACTA2,ACTC1,ADAMTS4,ADAMTS5,ADM,ADORA2A,ADRB2,ALCAM,ANK1,ANKH,ANXA1,APBA1,APOD,AQP1,ARL4A,ASB1,ASB2,ATP2B1,AURKA,BATF,BAZ1A,BCL2,BID,BIK,BIRC5,BMP2,BMPR1A,BMPR1B,BRCA1,BUB1,CAMK4,CAP2,Ccl2,CCL21,CCL5,CCNB1,CCNB2,CD74,CDC20,CDCA7,CDK1,CDKN1A,CENPM,CFB,CHRM3,CLCA1,CLCA2,CNN1,COL13A1,COL1A1,COL1A2,COL3A1,COL4A5,COMP,CPXM1,CRIM1,CSTB,CXCL3,CYCS,CYP1A1,CYP1B1,CYP26B1…	898 (21)
TNF		cytokine	Activated	3.072	8.92e-34	A4GALT,AATK,ABCG2,ABTB2,ACE,ACTA2,ADAMTS4,ADAMTS5,ADCY5,ADM,ADORA2A,ADRB2,AKAP12,ALCAM,ALDH3A1,ANGPT2,ANGPTL4,ANK3,ANXA1,AOC3,AQP1,ARHGAP18,ARHGAP22,ARHGEF17,ASS1,ATP1A1,ATP2A2,ATP2B1,AXIN1,B4GALT1,BCL2,BGN,BID,BIK,BIRC5,BMP2,BMPR1A,C1QTNF1,Ccl2,CCL5,Ccl6,Ccl7,CD36,CD5,CDH13,CDH5,CDKN1A,CFB,CH25H,CHSY3,CLDN5,CLEC11A,CMBL,CNN1,COL16A1,COL1A1,COL1A2,COL3A1,COL4A3,COTL1,CRISPLD2,CSF2RB,CTSF,CXCL3,CX…	748 (17)
Vegf		group	Activated	4.738	2.19e-33	ABCB1,ACE,ACTA2,ADORA2A,AKAP12,ANGPT2,ANGPT4,ANGPTL4,ARHGAP18,ARHGAP22,ARHGEF17,ASNS,AURKA,AURKB,BCL2,BIRC5,BMP2,BMP2K,BUB1,C1QTNF1,Ccl2,CDC20,CDH5,CDK1,CDKN3,CELSR1,CENPF,CNN1,COL4A3,Ctla2a/Ctla2b,CYYR1,DBF4,DCBLD2,DUSP5,EFNA1,EFNB2,ELN,EMCN,EMP2,ENPP2,EPHX4,ETS1,FABP4,FLNA,FLT1,FLT4,FN1,FOSL1,FST,GASK1B,GPRC5B,GRB14,HBEGF,HDC,HELLS,HMGCS2,HMMR,HOPX,HPSE,IGFBP3,IL6,INHBA,INSIG1,ITGA2,ITGA6,KDR,K…	743 (24)
dexamethasone		chemical drug	Inhibited	-3.274	8.58e-32	ABCB1,ACE,ACOT7,ACTA2,ACTC1,ACTG2,ADAM12,ADAMTS15,ADAMTS2,ADM,ADRA2A,ADRB2,AKAP12,ALCAM,ALDH1A1,ALPL,AMIGO2,AMY2B,ANGPTL4,ANO1,ANXA1,AOC3,APOD,AQP1,ARHGEF19,ASF1B,ASNS,ASPH,ATP11A,ATP1A1,ATP2A2,ATP2B1,ATP9A,BATF,BCL2,BGN,BIRC5,BLVRB,BMP1,BMP2,BRCA1,Calm1 (includes others),Cbr2,Ccl2,CCL21,CCL5,Ccl7,CD36,Cd59a,CD74,CDKN1A,CEP70,CFB,CHAD,CKLF,CLDN5,CLEC11A,CMKLR1,COL1A1,COL4A1,COL4A3,COL4A5,COL6A1,C…	857 (20)
lipopolysaccharide		chemical drug	Activated	4.814	1.14e-27	ABCB1,ACE,ACTA2,ACTC1,ADA,ADM,ADORA2A,ADRA2A,ADRB2,AFF3,AK4,ALCAM,ALDH3A1,ALOX12,ANGPT2,ANGPTL4,ANXA1,AQP1,ASS1,ATP1A1,ATP1A2,ATP2A2,ATP2B1,AURKB,AXL,BATF,BCL2,BGN,BID,BMP2,Calm1 (includes others),Ccl2,CCL21,CCL5,Ccl7,CCNB1,CCNB2,CD1D,CD36,Cd59a,CD68,CD74,CD9,CDC42EP2,CDH5,CDKN1A,CFB,CH25H,CLDN5,COL1A1,COL1A2,COL3A1,COL4A1,COL4A6,COL5A1,COL6A1,COL9A1,CSF2RB,CSPG4,CSTB,CXCL3,CXCL6,CYCS,CYP1A1,CYP7…	669 (15)
PDGF BB		complex	Activated	3.582	5.66e-25	ACTA2,ADM,ADRB2,AKAP12,ATP2A2,ATP2B1,BMP6,BRAP,BRCA1,Ccl2,Ccl7,CDK1,CDKN1A,CNN1,COL3A1,CYCS,DAB2,DCBLD2,DUSP5,EDNRB,EGFR,EREG,ETS1,FASN,FBLN5,FGFR1,FHL1,FLNA,FLT1,FMO1,FN1,FOSL1,FOXC2,FRZB,FXYD5,FZD1,FZD2,GADD45A,GJA1,GJA5,HBEGF,HSD3B7,IGF1R,IGF2,IL6,INHBA,KLHL21,LAMB2,LBP,LGALS3,LMNA,MICOS10-NBL1/NBL1,mir-24,MMP2,Mt1,Mt2,MYC,MYH11,NFIL3,NOX4,NR4A2,OLR1,PCNA,PCOLCE,PDGFRA,PDGFRB,PIM1,PLAT,PLK2,PO…	720 (20)
mifepristone		chemical drug		0.138	2.96e-23	ABCB1,ACE,ADM,ALPL,ANXA1,AQP1,BCL2,Cbr2,Ccl2,CD74,CDKN1A,CLEC3B,Ctla2a/Ctla2b,CTSF,DIO2,DKK3,DLC1,DNAJC2,EDNRB,EFNB2,EPHB3,FBLN2,FST,GJA1,H6PD,HBEGF,HDC,HOXA10,HPGD,HSD11B1,IGF2,IGFBP3,IL6,IRS2,ITGA2,ITGB3,KLK3,LAMA2,LAMC2,LOX,LRP1,Ly6a (includes others),MME,Mt1,MYC,NCOA1,NOX4,NPL,NPM3,NPY1R,OGN,OXTR,PAX9,PC,PCNA,PDGFRA,PFKFB3,PGLYRP1,PGR,PLAT,PLK2,POSTN,PTGIS,PTGS2,PTN,RAMP3,RELN,REM1,RGS2,RHOB,…	930 (24)
tretinoin		chemical - endogenous mammalian		0.466	5.8e-23	AATK,ABLIM1,ADA,ADAM11,ADAMTS5,ADM,AKAP12,ALDH1A1,ALDH3A1,ALPL,ANGPTL4,ANXA1,ANXA8/ANXA8L1,APBA2,APOD,AQP1,ASB2,ASNS,ATP1B3,ATP2A2,AURKA,B3GALT1,BCL2,BID,BIRC5,BMP2,BMP6,BMPR1A,BMPR1B,BRCA1,Calm1 (includes others),CAMK4,CASZ1,CBS/CBSL,Ccl2,CCNB1,CD1D,CD36,Cd59a,CD68,CD74,CD9,CDC20,CDCA7,CDH5,CDH6,CDKN1A,CDKN3,CHN2,CHST10,CKS2,CLEC11A,COL1A1,COL1A2,COL3A1,COL4A1,COL4A3,COL4A5,COL6A3,COTL1,CXCL6,CY…	830 (19)
ESR1	-0.35	ligand-dependent nuclear receptor		0.509	5.12e-22	AASS,ABCB1,ABCB9,ABCG2,ABLIM1,ACE,ACTC1,ADA,ALCAM,ANK3,AQP1,ARHGAP18,ASPM,ASS1,ATP11A,ATP2B1,AURKA,BCL2,BCR,BIRC5,BMP2,BRAP,BRCA1,BUB1,C1QTNF5,CAP2,CARD14,CCNB1,CDC42BPB,CDC42EP2,CDCA8,CDK1,CDKN1A,CDKN3,CELSR2,CENPA,CENPE,CENPF,CENPK,CENPL,CENPM,CENPQ,CEP70,CIT,CNN1,COL13A1,COL16A1,COTL1,CRIM1,CXCL3,CYFIP2,CYP1A1,CYP1B1,CYP26B1,CYP7B1,DAB2,DCBLD2,DCDC2,DTNA,DUSP5,EFEMP1,EFNA1,EFNB2,EGFR,ENAH,ENPP…	867 (21)
progesterone		chemical - endogenous mammalian		1.282	1.17e-21	ABCB1,ABCG2,ACE,ACOT7,ACPP,ACTA2,ADM,ADRA2A,ADRB2,ALDH1A1,ALPL,AMY2A,ANKH,APOD,AQP1,ARL4A,ATP1A2,AURKA,BCL2,BMP2,BMP2K,BRCA1,CADM1,CCNB1,CCNB2,CD1D,CD36,CDKN1A,CFB,CLCA1,CLDN5,CTSF,CYP1A1,CYP1B1,DLC1,ECE2,EFNA1,EGFR,ENPP2,EPAS1,ERBB2,FGFR2,FKBP3,FLT1,FN1,FOXC1,FST,GAP43,GGCT,GJA1,GPAM,GRINA,HBEGF,HDC,HELLS,HEY1,HOPX,HOXA10,HSD11B1,IGFBP3,IGFBP5,IL6,INHBA,INSR,IRS1,IRS2,ITGA2,KCNAB1,KCNH2,KDR,KLK3…	701 (24)
CG		complex		0.482	2.72e-21	ABCB1,ACPP,ACTA2,ADM,ARHGAP22,BCL2,BMP2,CAMK4,Ccl2,Ccl7,CDKN1A,CXCL3,DBI,DPT,EFEMP1,EFNB2,ELK3,EMCN,ENPP2,ENPP3,EPAS1,EPHA3,EPHB6,EREG,FABP4,FABP5,FGL2,FHL1,FJX1,FST,FZD1,FZD4,G0S2,GAS1,GASK1B,GATA4,GATA6,GGCT,GJA1,HAPLN1,HMGA1,HPGD,HPSE,HSD11B1,IGF1R,IGFBP3,IL33,IL6,INHBA,IRS2,ITGB3,ITGB5,LEPR,MAF,MAPKAPK2,MCAM,MMP2,MRPS6,NPR1,NRIP1,NRP1,OXTR,PARD6G,PCNA,PFKFB3,PGR,PLAT,PLAUR,PPARG,PTGS2,RGS2,RG…	905 (25)
FGF2		growth factor	Activated	2.422	2.72e-21	ACE,ACTA2,ADAMTS5,ADM,ANGPT2,ANGPTL4,BCL2,BGN,BIRC5,Ccl2,CDKN1A,CHRM3,COL1A1,COL1A2,COL3A1,CXCL6,DKK2,EDNRB,EFNB2,EGFR,EGLN3,ELN,ENPP2,EPAS1,EPOR,EREG,ETS1,ETV1,FABP4,FAH,FGFR1,FGFR2,FGFR3,FGFR4,FLNA,FLT1,FN1,FOSL1,FRRS1,GADD45A,GAP43,GJA1,GRIK5,HBEGF,HPSE,IGF1R,IGF2,IGFBP3,IGFBP5,IL6,INHBA,IRS1,KDR,LMNA,LOX,LYVE1,MCAM,Meis1,MEOX2,MGMT,MIF,MKI67,MMP2,MYC,NOG,NOTCH4,NR4A2,PCNA,PDGFC,PDGFRA,PDGFRB,…	761 (19)
TWIST1	-1.494	transcription regulator	Inhibited	-2.494	5.84e-21	ACTA2,ALCAM,ALDH1A1,AOPEP,APOD,ASPM,AXL,BCL2,C1QTNF1,Ccl2,CDKN1A,CELSR1,CHAD,COL1A1,COL6A1,DKK3,EFNB2,ENPP3,ETS1,FGFR2,FGFR3,FIBIN,FMOD,FN1,FOSL1,FOXC2,HEG1,HOXD10,IGFBP5,IL6,ITGA8,ITGB3,ITGB5,LMNA,LRG1,MME,MMP2,MRC2,NCAM1,OLFML3,OSGIN1,PAM,PCOLCE,PDGFRA,PTPRZ1,SDC3,SEMA5A,SNAI1,SPHK1,SPP1,TGFBI,THBS2,UNC5B,VCAN,VEGFA,ZEB2	687 (27)
HRAS		enzyme	Activated	2.732	7.94e-21	ADM,ADRA2A,ANTXR1,ANXA8/ANXA8L1,ARHGAP26,ASNS,ATP2A2,AURKA,AURKB,BCL2,BIRC5,BMP1,BOK,CAPG,Cbr2,Ccl2,CCL5,CCNB1,CDK1,CDKN1A,CFB,CNN1,COL1A1,COL1A2,COL3A1,COL4A1,COL6A2,CYP1A1,DIXDC1,DOK2,EFEMP1,EGFR,EIF4EBP1,ELK3,ELN,ETS1,FASN,FAT1,FBLN2,FHL1,FLNA,FLRT2,FN1,FOSL1,FSTL1,FSTL3,FURIN,FZD1,FZD2,GADD45G,GJA1,GNA14,HDC,HEY1,HEY2,HOXB6,HTRA1,IFI30,IGF1R,IGF2,IGFBP5,IL13RA1,IL17RD,IL6,ITGA6,ITGB5,KRT18,LA…	697 (22)
CTNNB1	-0.338	transcription regulator		-1.029	1.13e-20	ABCB1,ACTA2,ACTC1,ALCAM,ALDH1A1,ANXA1,AOC3,APOD,ARL4A,ATP6V0A1,AURKA,BCL2,BGN,BIRC5,BMP1,BMP2,BOLA1,C2orf40,CADM1,CASC4,Ccl7,CD36,CDKN1A,CELSR1,CENPM,CLDN5,COL1A1,COL4A1,COL4A5,COL4A6,CRIP1,CTHRC1,CTSF,Cux1,CXCL6,CYFIP2,CYP1A1,CYP1B1,CYP7B1,DES,DIO2,DIXDC1,DLK1,DTX1,EGFR,ENPP2,EPHB3,ETV1,EYA2,FABP4,FASN,FBLN2,FN1,FOSL1,FOXC1,FOXC2,FOXQ1,FST,FSTL3,FZD7,GADD45G,GALM,GAP43,GJA1,GPAM,GPR1,GPR137B,HAP…	905 (25)
trichostatin A		chemical drug		1.029	3.14e-20	ABCB1,ADAMTS5,AKAP12,ALPL,AURKB,BAIAP2,BCL2,BID,BIK,BMP2,BMPR1A,BRCA1,CA9,CAP2,Ccl2,CCNB2,CD1D,CD9,CDCA7,CDK1,CDK16,CDKN1A,CENPM,CLEC3B,COL1A2,COL6A3,CPD,CXCL3,CYP1A1,CYP1B1,CYP4B1,DAG1,DLC1,DNM3,DOK2,EFNA3,EFNB2,EGFR,ELOVL6,ENPP2,EPHA3,EPHB3,ERBB2,FABP4,FASN,FBLN1,FGFR1,FGFR3,FGFR4,FLRT3,FLT1,FN1,FNBP1,FOXC1,FOXF2,FRZB,FST,GADD45A,GADD45G,GAP43,GATA6,HBA1/HBA2,Hbb-b1,Hbb-b2,HDAC11,HDAC9,HMGCS2,H…	676 (18)
ESR2		ligand-dependent nuclear receptor		0.187	5.23e-20	A4GALT,ABLIM1,ACTC1,ADAMTS5,AKAP12,ANK1,ARL4A,ARRDC4,ASB2,ATP2B1,BCL2,BID,BIRC5,BMP2,CBS/CBSL,CDKN1A,CNN1,COL13A1,COL16A1,COL1A1,COMP,CRIM1,CYP26B1,CYTH4,EGFR,ENPP2,ENPP3,EPHA3,EREG,FASN,FBLN1,FGFR1,FHL1,FOXQ1,FZD2,GGCT,HPGD,IGF1R,IGFBP3,IP6K3,ITGA2,KDR,KLK3,LAPTM5,LMNA,LOXL4,LPL,LTBP1,ME2,MGAT3,MICOS10-NBL1/NBL1,MKI67,MME,MMP2,MPP7,MYC,NID2,NKX3-1,PERP,PGR,PLAUR,PLXDC1,PPP1R3C,PSAT1,PTGIS,PTGS2,…	870 (21)
EGF		growth factor		1.39	1.15e-19	ABCG2,ACOT2,ACTN1,ADA,ALCAM,ALOX12,ATP2A2,AURKA,AURKB,B4GALT1,BCL2,BIRC5,BRCA1,Ccl2,CCNB1,CDK1,CDKN1A,CKS2,COL1A1,COL1A2,COL3A1,CXCL6,CYP1A1,DIO2,DUSP5,EFNB2,EGFR,EIF2AK3,ENAH,EPAS1,ERBB2,EREG,ETS1,FASN,FGFR1,FLT1,FN1,FOSL1,FST,FSTL1,GAB2,GADD45A,GAS1,GJA1,GRB7,Gsta4,HAS3,HBEGF,HPGD,IGF1R,IGF2,IGFBP3,IGFBP5,IL6,INHBA,IRS1,ITGA2,ITGB3,JAG2,KLK3,LCN2,MAPK11,mir-24,MMP2,MYC,NCAM1,NFE2L1,NGF,NPR2,NR4…	763 (19)
PD98059		chemical - kinase inhibitor	Inhibited	-2.895	1.25e-19	ACE,ACOT7,ACTA2,AKAP12,ANGPT2,ANXA1,BCL2,BGN,BIRC5,BMP2,Ccl2,CCL5,CCNB1,CD36,CD74,CDKN1A,CHN1,COL1A1,COL1A2,COL3A1,COL4A1,CXCL3,CYCS,CYP1A1,CYP1B1,DCBLD2,DES,DIO2,DUSP5,DYRK1B,ECE1,EDNRB,EGFR,EIF2AK3,ELN,EPAS1,ERBB2,EREG,ETS1,FABP4,FAH,FASN,FN1,FOSL1,FOXC2,FURIN,GADD45A,GAP43,GAS7,GJA1,GP1BA,HBEGF,HPGD,HYOU1,IGF1R,IGF2,IGF2BP2,IGFBP3,IL6,INSIG1,INSR,ITGA2,ITGB3,ITGB5,KIF22,LPL,MAPKAPK2,MIF,MKI67,…	625 (17)
AGT		growth factor		1.83	2.11e-19	ACE,ACTA2,ADAM12,ADAMTS5,ADM,Aff2,ALOX12,ANGPT2,ANK3,ANXA1,ARID1B,ATP1A1,ATP2B1,BCL2,BGN,BMP6,BOK,BRCA1,Calm1 (includes others),Ccl2,CCL5,CD36,CDH13,CDK1,CDKN1A,CIT,COL1A1,COL1A2,COL3A1,COL4A1,COL4A6,COL6A1,Cox6c,CXCL3,DAB2,DHFR,EDNRB,EFEMP1,EFNB2,EGFR,EREG,ETS1,ETV1,FASN,FGF13,FLT1,FN1,GAP43,GJA1,HBEGF,HEY1,HMGB2,HSPG2,IGF1R,IGFBP3,IGFBP5,IL6,INSR,ITGA2,ITGA7,ITGB3,ITGB5,LAMB1,LATS2,LEPR,MATN2,M…	686 (19)
AHR	0.6	ligand-dependent nuclear receptor	Activated	2.477	3.21e-19	ABCG2,ACTA2,ACTN1,ADAMTS2,ADAMTS5,ADM,ALDH3A1,APH1B,ATP2B1,CCL21,CCL5,CCNB1,CD36,CDK1,CDKN1A,Ces2c,COL13A1,COL16A1,COL1A1,COL1A2,COL3A1,COL4A1,COL5A1,COL6A1,COL6A3,CYP1A1,CYP1B1,DHFR,EBF1,EFEMP1,EGLN3,EMILIN2,FABP4,FBLN2,FBLN5,FGFR2,FMO3,FN1,FOSL1,FZD7,GADD45A,GAS1,GPAM,HDAC9,HEY2,IL6,ITGA6,ITGA7,ITGBL1,KLF2,LBP,LTBP1,LTBP2,LTBP3,LTC4S,MATN2,MMP2,Mt1,Mt2,MYC,NID2,NNMT,NPTX1,NQO1,Pcp4l1,PDGFRA,PDG…	788 (20)
HGF		growth factor	Activated	5.36	4.4e-19	ABCG2,ACTA2,ADORA2A,AKAP12,ANGPT2,ANGPT4,ANGPTL4,ANK3,ASNS,AURKA,AURKB,BCL2,BIRC5,BMP2,BMP2K,BUB1,CA9,Ccl2,CCL5,CDC20,CDK1,CDKN1A,CDKN3,CELSR1,CENPF,COL1A1,COL1A2,COL3A1,COL4A1,DBF4,DES,DYNLL1,EFNB2,EMP2,ETS1,FLNA,FLT1,FN1,FOSL1,GRB14,HBEGF,HELLS,HMMR,IGFBP3,IL6,INHBA,INPPL1,INSIG1,IRF8,ITGA2,ITGA6,KIF20B,KIF22,KIF2C,KRT18,LAMC2,LCN2,LGMN,LY75,LYVE1,MAP3K8,MAPKAPK2,MEOX2,MKI67,MMP2,MPHOSPH10,MYC,…	733 (20)
forskolin		chemical toxicant		1.318	2.06e-18	ACE,ACPP,ACTA2,ACTG2,ACTN1,ADM,ADORA2A,AKAP12,ALDH3A1,ALPL,ATP9A,AVPI1,B4GALT1,BCL2,BIRC5,CAP2,CCL5,CCNB1,CCNB2,CD68,CD9,CDK16,CDKN1A,CDKN3,CERK,CNN1,COL1A1,COL1A2,CRISPLD2,CXCL3,CYFIP2,CYP1B1,DAB2,DIO2,DUOX2,EGLN3,EREG,FAH,FBLN5,FGFR2,FN1,FOSL1,FRRS1,FST,GAB2,GADD45A,GADD45G,GAP43,GATA4,GJA1,GNA14,GPRC5B,GPRC5C,GTSE1,HAPLN1,HAS3,HPGD,HSD11B1,IGF1R,IGF2,IGFBP3,IGFBP5,IGFBP6,IL6,INHBA,IRS2,ITGB5,K…	760 (18)
TP73		transcription regulator		-1.411	2.38e-18	4930486L24Rik,ABCB1,ACTA2,ADA,AEN,ANGPTL4,ARHGAP22,ARL5C,AURKA,BCL2,BID,BIRC5,C1R,CADM1,Ccl2,Ccl6,CCNB1,CDC20,CDC42EP2,CDK1,CDKN1A,CDKN3,CKS2,COL1A1,CXCL3,DHFR,EGFR,EREG,FASN,FGFR2,FGFR3,FKBP1B,FLT1,FN1,FST,G0S2,GAB2,GADD45A,GPR137B,GTSE1,HBEGF,HPSE,HS6ST1,IGFBP3,IGFBP5,IL6,IL7,IRF5,JAG2,KIF22,KIF23,KLHL21,LCP1,LRG1,LTBP1,Meg3,MGMT,MICOS10-NBL1/NBL1,MMP2,MMP23B,MMP28,MYC,NCAM1,NRP1,PDGFRB,PDPN,PE…	645 (19)
dextran sulfate		chemical drug		1.434	5.48e-18	ACE,ADA,AURKA,BIRC5,BUB1,Ccl2,CCL5,CCNB1,CD36,CD74,CDC20,CDCA2,CDCA3,CDCA5,CDCA8,CDK1,CENPE,CXCL3,CXCL6,EFNA5,EFNB2,EXO1,FBXO5,FGFR1,FGFR3,FIGNL1,IFITM3,IGF1R,IL6,LCP1,LY96,MKI67,MMP2,MNS1,MRC1,MYC,NCAPH,NDST1,NEK2,NFATC2,NQO1,NRP1,NUSAP1,PCNA,PGF,PLK1,PRC1,PTGS2,PTN,RACGAP1,RAD51,RRM2,Slfn2,SMC2,SPC25,SPHK1,SPON2,STEAP3,STMN1,THBS1,THBS2,THBS4,TIMP2,TOP2A,TPX2,TRIP13,UBE2C,VEGFA,VEGFC	624 (17)
decitabine		chemical drug		1.804	2.97e-17	ABCB1,ADCY5,ADRB2,AKAP12,ANGPTL4,BAIAP2,BID,BMPR1A,CA9,CADM1,CAP2,CASZ1,Ccl2,CCL5,CD9,CDA,CDCA7,CDH13,CDH6,CDK1,CDK16,CDKN1A,CLDN5,COL1A1,COL1A2,COL3A1,COL6A3,CXCL3,CYP1A1,CYP1B1,CYP4B1,DLC1,DNM3,EDA2R,EFNA3,EFNB2,EGFR,ELOVL4,ELOVL6,EPHA3,EPHB3,EPHB6,ERBB2,FGFR1,FGFR3,FLRT3,FN1,FOXC1,FOXF2,GADD45G,GAP43,GATA6,HBEGF,HELLS,HMGCS2,HMMR,HOXA10,HOXB9,HPGD,HPSE,HTRA3,IFI16,IGF2BP2,IGFBP3,IGFBP7,IGSF9,I…	785 (23)
VCAN	0.98	other	Inhibited	-2.026	3.16e-17	ADAMTS9,ADM,ANGPTL4,ANXA8/ANXA8L1,AOC3,ASS1,ATRN,C1R,Calm1 (includes others),Ccl2,CDH13,CDKN1A,COMP,CRISPLD2,CXCL6,DAG1,EGFR,ELN,ENPP2,FABP5,FBLN5,FN1,FST,GPC6,HAS3,IL6,IRF8,LAMB1,LBP,LCN2,LGALS3,LOXL4,METRNL,MIF,MYH10,OGN,OLFML2B,PAM,PRELP,PTGIS,RGS2,SMAD3,SMOC1,SORT1,TCF7L2,TGFA,TIMP1,TMEM204,VCAN,VEGFA,XAF1	492 (17)
LDLR	0.192	transporter		-1.225	3.47e-17	ALCAM,AURKA,AURKB,BGN,BIRC5,BMP2,Ccl2,CCL5,Ccl7,CCNB1,CCNB2,CD36,CD68,CDCA3,CDK1,CDKN1A,CENPA,CENPF,CFB,CYP7B1,ELOVL6,FABP5,FADS2,FASN,FGL2,GADD45G,GATM,GJA1,GJA5,GNGT2,GPAM,H6PD,HELLS,HSPG2,IL6,ITGB3,KIF23,KIF2C,KIF4A,LCN2,LPL,LRP1,MIF,MKI67,MMP2,MYC,NR1H3,NUSAP1,PLK1,PPARG,PRC1,RAD51,SCD,SPP1,TOP2A,TRIB1,UBE2C,VCAN,VIPR1,WFIKKN1,ZBP1	668 (20)
COLQ		other		0.424	1.22e-16	ADAMTS2,ADAMTS5,BGN,BMP1,CLSTN1,COL4A1,COL6A3,DAG1,DTNA,FBLN5,FN1,GPC4,HSPG2,ITGA7,LAMA4,LAMB1,LAMB2,LRP4,LTBP1,LTBP3,LTBP4,MFAP2,MMP16,MMP2,NID2,PRELP,RAPSN,SGCG,SNTA1,SSPN,TIMP1,VCAN
GLI1		transcription regulator		-0.73	1.5e-16	ABCG2,ASPM,BCL2,BID,Ccl2,CDKN1A,CMBL,COL1A1,DIO2,FHL1,FOXC2,GALNT2,GATA4,GATA6,GMFG,GREM2,HEY2,HPSE,IGF2,IGFBP6,IGFBP7,IL6,INSIG1,IRS1,JAG2,KLK3,LMNA,MAN1C1,MAPK11,MEST,MMP2,MRPS6,NIPAL2,NOG,NR2F2,PCOLCE2,PDGFRA,PDZRN3,PIM1,PLXDC1,PTCH1,PTH1R,PTHLH,RGS10,RHOB,SFRP1,SNAI1,SOX5,SPP1,SYNE1,TMEM100,TNC,TSC22D1,ULK1,VEGFA,VEGFC,VIL1,WIF1	667 (24)
ITGB1	-0.611	transmembrane receptor		-0.514	1.53e-16	ACTA2,ADAMTS2,ADAMTS5,ADAMTSL1,BCL2,BMP1,BMPR1A,BMPR1B,CDKN1A,COL1A1,COL1A2,COL4A4,DAG1,EIF4EBP1,ERBB2,FGFR3,FLNA,FN1,GAS1,GDF6,HAS3,HSPG2,IGF2,IL6,ITGA7,ITGA9,ITGB3,LAMB1,LOX,LOXL1,LTBP3,MATN2,MMP2,MYC,OLFML3,PLAUR,PTGS2,RELN,ROBO1,SEMA5B,SNAI1,SPON1,TCF4,THBS1,TIMP2,VEGFA	616 (19)
IFNG		cytokine	Activated	3.766	2.53e-16	ABCB1,ABLIM3,ACE,ACTA2,ADAMTS9,ADCY5,ADCY7,ADM,ADORA2A,ADRA2A,ALOX12,ALPL,ANGPTL4,AQP1,ASNS,ASS1,ATP1A1,ATP2A2,BCL2,BID,BMP6,BST1,C1R,CAMK4,Ccl2,CCL5,Ccl6,Ccl7,CD1D,CD36,CD68,CD74,CDH13,CDH5,CDKN1A,CELSR1,CELSR2,CFB,CH25H,CHST8,COL1A1,COL1A2,CSF2RB,CSK,CXCL17,CXCL3,CXCL6,Cyb5r3,DUOX2,DUOXA2,DUSP5,ECE1,EDNRB,EFNB2,EGLN3,ELN,EMID1,ENTPD2,EPOR,ERBB2,FABP5,FAH,FAM107A,FASN,FBLN1,FGL2,FLRT2,FLT1,FLT4,…	601 (15)
Alpha catenin		group		0.995	5.85e-16	ADAM33,ADAMTS2,ADAMTS4,ADAMTS5,BGN,COL1A1,COL1A2,COL3A1,COL5A1,COL6A1,COL6A2,COL6A3,CXCL6,ELK3,ELN,EPHA3,EREG,FMNL2,FSTL1,GAP43,IGF2,IGFBP6,IGFBP7,IL2RG,IL6,KLK3,LAMA2,LAMA4,LYN,MMP2,MMP23B,MYC,PDGFRA,PTGS2,SNAI1,STEAP4,THBS2,TIMP1,TNC,TSPAN8,TWIST1,ZEB2	697 (20)
calcitriol		chemical drug	Inhibited	-2.456	7.84e-16	ABCB1,ABL1,ABLIM1,AGR2,ALPL,ANGPT2,ATP2B1,BATF,BCL2,BIRC5,BRCA1,C15orf48,CCNB1,CDC20,CDCA5,CDCA8,CDK1,CDKN1A,CENPA,CENPM,CENPQ,COL4A1,CXCL3,CXCL6,CYP1A1,DCTPP1,ECT2,EGFR,ELN,ERBB2,EXO1,EXOSC8,FABP4,FAM107A,FASN,FGFR3,FIGNL1,FN1,GADD45A,GADD45G,GATA6,HBEGF,Hmgb3,HPGD,HSPB7,IGF1R,IGFBP3,IGFBP5,IL10RA,IL6,KCTD12,KIF22,KIF23,KPNA2,LCN2,LPAR1,LPL,LRRC17,LTBP1,Ly6a (includes others),MAF,MRC1,MRPL41,MRP…	653 (20)
FOS	-0.234	transcription regulator		1.292	8.09e-16	4930486L24Rik,ABCB1,ADAM12,AMIGO1,ANK3,B4GALT1,CADM1,CASZ1,CCL5,Ccnjl,CD68,COL16A1,COL1A1,COL6A1,CYCS,DAPK2,DIO2,ELOVL6,ENAH,EPHX2,EPS8,EREG,FABP4,FASN,FBLIM1,FLRT2,FN1,FOSL1,FOXC1,FRZB,FSTL1,GAS1,GATA4,GJA1,HBA1/HBA2,Hbb-b1,HIPK3,HMMR,HPGD,IGFBP5,IGFBP6,IL6,IRS2,ITGA6,LGALS3,LOX,LPL,LTBP1,LTBP2,LTBP3,LYPD6,MMP2,MMRN1,Mt2,MYC,NCF2,NFIL3,NGF,NOTCH4,NPTX1,NQO1,NR1H3,NRIP1,NTS,OXTR,PCDH19,PCNX1,PDPN…	719 (21)
diethylstilbestrol		chemical drug		0.389	8.96e-16	ABCG2,ALPL,AURKB,CCL21,CCNB2,CDH13,CDKN1A,CENPE,CENPF,CFB,COL1A1,COMP,CPXM1,CXCL6,DCLK1,DPT,DPYSL2,EGFR,ENDOU,EREG,FBLN1,FMO1,FMOD,FRZB,GADD45A,GAP43,GATA4,GATA6,HBEGF,HDC,HELLS,HOXA10,HTRA3,IGF1R,IGFBP3,IGFBP6,INHBA,IQGAP3,IRS1,ITIH4,KDR,KIF22,KIF4A,KLK3,LTBP2,MFAP2,MFAP4,MKI67,MMP2,MNS1,NTRK2,OXTR,PARD6G,PCNA,PCOLCE,PDGFRA,PDGFRB,PGLYRP1,PGR,PIM1,RGS4,RGS5,S100A6,SCARA5,SH3GL3,Sprr2a1/Sprr2a2,S…	808 (20)
IGF1	0.345	growth factor		1.14	1.06e-15	ACTA2,ADA,ADM,ANGPT2,BCL2,BGN,BIRC5,BMP2,BRCA1,Ccl2,CCL5,Ccl7,CCNB1,CDK1,CDKN1A,CLEC11A,CNN1,COL1A1,COL3A1,CXCL6,CYFIP2,DCLK1,DYRK1B,EFNB2,ELN,EPAS1,FABP4,FASN,FGFR1,FJX1,FN1,FOXC2,GADD45A,GADD45G,GAP43,HAPLN1,HDC,HMGA1,HSD11B1,IFITM3,IGF1R,IGF2,IGFBP3,IGFBP5,IGFBP6,IL6,INSR,IRS1,IRS2,ITGB5,LCN2,LEPR,LPL,Ly6a (includes others),MIF,MKI67,MMP2,MYC,MYH11,NCAM1,NCF2,NOG,NOX4,NTRK2,PBK,PCNA,PCOLCE,PDE…	701 (17)
gefitinib		chemical drug		0.932	1.6e-15	ADAMTS15,ALDH1A1,AURKA,AURKB,BCL2,BIRC5,BRCA1,BUB1,Ccl2,CCNB1,CELSR2,CKAP2,COL1A1,CTNNAL1,DHFR,ECT2,EFNA1,EGFR,ERBB2,FGFR2,FLT1,FOSL1,FSCN1,GJA1,HYAL1,IGFBP5,IL7,ITGA2,KIF23,MKI67,NOX4,NRP2,PCDH12,PCNA,PDGFRA,PLAUR,PPARG,PRC1,PTGER1,PTGS2,RAD18,RHOB,SMC2,SMO,SPRED2,TIMP2,TOP2A,TRAF1,TWIST1,VEGFA,WNT5B	721 (23)
CREB1	-0.226	transcription regulator		1.307	2.34e-15	Abca8a,ADM,ADORA2A,AK4,APOLD1,ARPC3,ATP1A1,AURKA,BCAP29,BCL2,BIRC5,CACNA2D1,CAMK4,CCDC85A,CCNB1,CCNB2,Ccnjl,CD68,CD9,CDA,CDCA8,CDH13,CDKN1A,CH25H,CNN1,CPD,CRIM1,CYFIP2,DIO2,DKK2,FASN,FGF13,FGFR2,FGL2,FLT1,FN1,GAA,GADD45A,GADD45G,GAP43,HPGD,HSD11B1,IGSF10,IL6,INHBA,IRS2,ITGBL1,KCNC4,KDELR3,LCN2,LMO1,LPL,LYPD6,MARCKSL1,MCAM,Meis1,MEST,MKI67,MKNK2,MNS1,MRC1,MTSS1,MYC,MYH10,MYO1B,NEO1,NFIL3,NKX6-2,NR…	706 (18)
INHA		growth factor	Activated	2.714	4.04e-15	ACTA2,ACTG2,ADAMTSL2,BCL2,BOC,CNN1,COL1A2,COL3A1,COL4A4,COL4A5,COL4A6,COL6A1,COMP,CYP1B1,CYP26B1,EGFR,EMILIN2,EREG,FGFR1,FGFR4,FST,INHBA,ITGA9,KRT18,LAMC3,LMNA,LTBP1,MATN2,MMP2,MYC,MYH11,MYO18A,MYO7A,PRSS23,PTGS2,SFRP4,SMAD7,TBCEL	445 (12)
LY294002		chemical - kinase inhibitor	Inhibited	-2.655	7.86e-15	ABCB1,ABCG2,ACTA2,ADRB2,ANGPT2,ATP2B1,AURKA,AXIN1,BCL2,BIRC5,BMP2,BRAP,CA9,Ccl2,CCL5,CCNB1,CD36,CD74,CDKN1A,CKS2,COL1A1,COL1A2,CXCL3,CXCL6,DHFR,EFNB2,EGFR,EPAS1,EREG,ETS1,FASN,FLRT2,FLT1,FN1,FOSL1,FOXC1,FOXC2,GJA1,GP1BA,GPR137B,Gsta4,HAPLN1,HBEGF,HMGB2,IGF1R,IGF2,IGFBP3,IGFBP5,IL6,INPP4B,INSR,IRS1,IRS2,ITGB3,ITGBL1,LAMB1,LAMC2,LCN2,LMNA,MAF,MAP3K8,ME1,MMP2,MYC,MYH11,NDC80,NPTX1,NQO1,NR4A2,NRN1,NT…	750 (20)
troglitazone		chemical drug		0.399	8.79e-15	AATK,ABCG2,ACOT2,ACTA2,ANGPTL4,ARHGEF19,ATP2B1,BCL2,BIRC5,BMP1,Ccl2,CCL5,CCNB1,CD36,CDKN1A,CEP70,COL1A1,COL1A2,COL4A1,CTNNAL1,CXCL3,CXCL6,CYP1A1,DBI,ECT2,EGLN3,ENTPD5,EPHA1,ETS1,FABP4,FABP5,FADS2,FASN,FGGY,FN1,FOSL1,G0S2,GADD45A,GPAM,HBA1/HBA2,HIPK3,HMMR,IFI16,IL6,IRS1,ITGA6,KLK3,LAMA4,LPL,LTC4S,ME1,MGMT,MKI67,MME,MYC,MYH11,NCAPH,NEIL3,NNMT,NR1H3,NR2F2,NRIP1,PC,PCNA,PDE3B,PDGFRA,PLIN4,PPARG,PTGS2…	787 (21)
GNA15	-1.23	enzyme			1.09e-14	ACTA2,ADM,AKAP12,Ccl2,CXCL3,CYCS,DAB2,FBLN5,FHL1,FMO1,FOSL1,FXYD5,GADD45A,HSD3B7,IL6,LAMB2,LBP,LGALS3,MICOS10-NBL1/NBL1,Mt1,MYC,MYH11,NOX4,OLR1,PLAT,PRKAA2,PRSS35,PTGS2,RAPGEF4,RGS2,SELENBP1,SERPINA3,SLC6A4,SLC6A6,SYNE1,TIMP1,UNC5B,VCAN,XDH	654 (19)
tetradecanoylphorbol acetate		chemical drug	Activated	3.153	1.63e-14	ABCB1,ACE,ADAMTS4,ADCY3,ADM,ADORA2A,ALOX12,AMIGO2,ANGPT2,ANGPTL4,ANXA1,APRT,ATP2A2,AURKA,AURKB,AXL,BCL2,BIRC5,BMP6,CAPG,CBS/CBSL,Ccl2,CCL5,Ccl6,Ccl7,CD36,Cd59a,CD68,CDK1,CDKN1A,CERK,CH25H,CXCL3,CXCL6,CYP1A1,CYTH4,DAB2,DES,DUSP2,DUSP5,DUSP8,ECE1,EFNB2,EGFR,EIF4EBP1,EPOR,ERBB2,ETS1,FLT1,FOSL1,FOXC2,FST,FSTL3,FURIN,FZD1,GAP43,GJA1,GPHA2,HAPLN1,HBEGF,HDC,HMGA1,HPSE,HSD11B1,IGF2,IGFBP3,IGFBP5,IGFBP6,I…	923 (22)
estrogen receptor		group		-0.334	1.84e-14	ABCG2,ANXA1,AXL,BCL2,CAPG,CD5,CD68,CDH13,CDH5,CNKSR1,COL13A1,COL4A1,COL4A5,COL4A6,COL5A1,COL6A1,COL6A2,CYP1A1,DSP,EGFR,ERBB2,EREG,ETS1,FGF13,FGFR1,FGFR2,FGFR3,FGFR4,FN1,HBEGF,IL6,IRS1,KRT18,LAMC2,LYN,MYC,NCAM2,NRIP1,OXTR,PCDH1,PCDH19,PDGFC,PDGFD,PGR,PLAUR,POR,RGS2,SMAD1,SMAD3,SMAD6,SNAI1,SOST,SYNPO,TGFA,TIMP1,TIMP2,TNC,VEGFA,VEGFC,WNT5B	845 (21)
NR1H3	0.848	ligand-dependent nuclear receptor		-0.877	3.14e-14	ABCA2,ACTA2,ADRB2,APOD,AURKA,AURKB,BIRC5,Ccl2,CCL5,Ccl7,CCNB1,CCNB2,CDCA3,CDK1,CDKN1A,CENPA,CENPF,CFB,DIO2,FASN,FGL2,GNGT2,GPAM,Gsta4,HELLS,HSD11B1,IL6,ITGB3,KIF23,KIF2C,KIF4A,LPL,MIF,MKI67,Mt1,Mt2,NR1H3,NUSAP1,PLK1,PPARG,PRC1,PTCH1,PTGS2,RAD51,SCD,SLC2A4,SNAI1,THRA,THRB,TOP2A,TRIB1,UBE2C,VCAN,VEGFA,VIPR1,ZBP1	685 (21)
EP300	-0.176	transcription regulator		-0.017	3.3e-14	ADAM12,ADORA2A,AKAP12,ARHGEF10L,ARID5A,BIRC5,BRCA1,CAMK4,CAPG,CD36,CDKN1A,COL1A2,CORO2B,CRIM1,CRISPLD2,CXCL3,CYP1A1,DHFR,DTX1,EPN1,ERBB2,EYA2,FABP4,FASN,FMNL2,FN1,FNBP1,FNDC3B,GNG2,H6PD,HDAC11,HMGCS2,HSD11B1,HVCN1,IGF1R,IGFBP6,IL10RA,IL17RA,IL6,ITGA6,ITGA9,KDR,KLHL4,KLK3,LAMC2,LMNA,MAF,MAP3K8,MBTPS1,MFHAS1,MGMT,MKI67,MME,MYC,MYH11,Nebl,NKX3-1,NPR1,NTRK3,OLR1,PDE10A,PDGFRB,PDLIM4,PERP,PGR,PLA2G7,P…	822 (28)
SMAD7	-1.232	transcription regulator		1.681	3.61e-14	ACTA2,ADAMTS2,BGN,BMP2,BMPR1A,BMPR1B,Ccl2,CCL5,CCNB1,CDK1,CDKN1A,COL1A1,COL1A2,COL3A1,COL6A1,COL6A3,EFEMP1,EIF4EBP1,FN1,FST,FSTL3,FURIN,GADD45A,GATA4,HBEGF,HDAC9,ITGA6,ITGA7,ITGBL1,LTBP2,LTBP3,MATN2,MMP2,MYC,NID2,PCNA,PLAT,SCD,SEMA3F,SMAD3,SMAD7,TGFA,TGFBI,TIMP1,VEGFA	516 (18)
medroxyprogesterone acetate		chemical drug	Inhibited	-2.754	4.19e-14	ANGPT2,ASPM,BCL2,BIRC5,CAMK4,Ccl2,CCL5,CCNB1,CCNB2,CDK1,CENPF,COL4A3,CYP1A1,DEPDC1,DLGAP5,ERBB2,ETS1,FASN,FMOD,FN1,HSD11B1,HTRA1,HTRA3,IL6,KIF18A,LMNA,MYC,NCAPG,NEK2,NUSAP1,PBK,PGR,PRC1,ROBO1,SCD,SPC25,TFPI2,TNC,TWIST1,VCAN,VEGFA	890 (24)
dihydrotestosterone		chemical - endogenous mammalian		-0.05	4.34e-14	ACPP,ADM,AIG1,ANO1,APOD,AQP1,ASAP2,ATP2A2,BCL2,BGN,C1orf116,C1orf21,CCNB1,CD36,CD74,CDC20,CDCA7,CDKN1A,CMKLR1,COL3A1,COL4A1,COL6A1,CYP4B1,DBI,DCTPP1,DEPDC1,DIO2,DYNLL1,EFNA1,EGFR,EIF4EBP1,ELN,ERBB2,ETV1,FABP4,FASN,FGFR1,FN1,FOXQ1,FST,G0S2,GAP43,HPGD,IGF1R,IGFBP3,IGFBP5,IGFBP7,IL6,INSR,IRS2,ITGA2,KCNH2,KLK3,LOX,LPL,LTBP1,MAF,MCAM,ME1,MME,MMP2,Mt1,MYC,MYRIP,NID2,NKX3-1,OXTR,PAM,PC,PDE9A,PER1,POSTN,…	889 (24)
TGFB2	0.325	growth factor		-1.827	4.47e-14	ACTA2,ANGPTL4,CD36,CDH5,CNN1,COL1A1,COL1A2,COL3A1,COL4A1,COL6A2,Ctla2a/Ctla2b,DES,FMOD,FN1,FURIN,GAS1,HBEGF,HEY1,HSPG2,INHBA,ITGB5,KDR,LTC4S,MMP2,NFATC2,NGF,PDGFRB,PLOD2,PTHLH,SCD,SMAD3,SPHK1,SPP1,THBS1,TIMP1,TIMP2,VCAN,VEGFA	792 (20)
ZBTB17	0.166	transcription regulator	Inhibited	-5.531	5.05e-14	ASPM,AURKB,BCL2,CCNB1,CCNB2,CDC20,CDCA8,CDK1,CDKN1A,CENPF,CEP55,CKAP2,ECT2,EDA2R,HMMR,IQGAP3,KIF18B,KIF22,KIF2C,KIF4A,MKI67,NCAPH,NDC80,NEK2,NUSAP1,PBK,PLK1,PRC1,RACGAP1,TOP2A,TPX2,UBE2C	630 (20)
PPARGC1A	0.24	transcription regulator		0.098	6.47e-14	ADAMTS2,ADAMTS5,APOD,Ccl7,CD36,CD68,CDKN1A,COL1A2,COL6A2,COL6A3,COMP,CPXM1,CYCS,CYP1A1,DIO2,DPT,EGFR,EMILIN2,EPAS1,ERBB2,FABP4,FASN,FBLN1,FBLN2,FIBIN,GPAM,GPC6,HAPLN1,HMGCS2,IGFBP3,IGFBP5,IGFBP6,IGFBP7,IL6,INHBA,INSIG1,IRS2,ISM1,LAMA2,LAMA4,LAMB1,LPL,ME1,MMP2,NDUFS8,NR1H3,OGN,OLFML3,OLR1,OXCT1,PLA2G7,PLA2R1,PODN,POSTN,PRKAA2,PTGS2,PTN,SCD,SEMA3A,SEMA3C,SERPINA3,SLC2A4,SLIT3,SMAD7,SPARCL1,STC1,THR…	396 (15)
CCND1	0.401	transcription regulator	Activated	2.382	6.53e-14	ASAP2,ASPM,AURKA,BCL2,BIRC5,BRCA1,CDCA2,CDCA7,CDCA8,CDKN1A,CENPF,CENPK,CEP55,COL1A1,COL20A1,DEPDC1,DKK2,EGFR,ENPP2,EPS8,ERBB2,EREG,ESCO2,FAM129B,FAM83D,FGFR1,FLNA,FZD7,GATA4,GPC6,ITGB3,KIF20B,KIF2C,KIF4A,KLK3,LAMB2,MAML3,MMP2,MNS1,MYC,MYO7A,MYRIP,NCAPH,PBLD,PCNA,PDLIM4,PGR,PLK1,PPARG,PSMC3IP,RACGAP1,RAD51,RBMS3,RCN1,RGS2,RHPN2,ROR2,RRM2,SELENBP1,SLC4A4,SOX4,SPC25,SPP1,STBD1,TCF4,TMEM204,TP53INP2,…	640 (23)
KRAS	-0.284	enzyme	Activated	2.129	1.07e-13	AEN,AKAP5,ANXA8/ANXA8L1,ARPC3,AXL,BCL2,BGN,BIRC5,Ccl2,CCNB1,CD74,CDKN1A,CHSY1,COL1A1,COL3A1,COL4A1,COL4A3,CXCL6,DCLK1,DHFR,DPYSL2,DUSP5,EFEMP1,EFNA1,EGFR,ELN,EMP2,EREG,ETV1,FAH,FASN,FBLN2,FN1,FOSL1,FSTL1,GADD45A,GAS1,GJA1,HBEGF,HMGA1,HOPX,HYOU1,IFITM3,IGF1R,IGF2,IGF2BP2,IL33,IL6,IP6K2,ITGB3,KIF22,LCN2,LGALS3,LOX,LTBP4,Ly6a (includes others),MCAM,MICOS10-NBL1/NBL1,MMP2,MYC,NCAM1,NQO1,NRN1,PCOLCE,P…	698 (17)
AR		ligand-dependent nuclear receptor		-0.873	1.36e-13	4930486L24Rik,ACPP,ADM,ALDH1A1,ATP2A2,BIRC5,BUB1,CA7,CDCA5,CDKN1A,CENPE,CIT,CKAP4,CLSTN1,COL3A1,DBI,DCTPP1,DEPDC1,DES,EDNRB,EGFR,EPAS1,ERBB2,ETV1,FABP5,FAM174B,FGFR2,GJA1,GPR182,HOPX,HSPB7,IGF1R,IGF2,IGFBP3,IGFBP5,IL6,INPP4B,ITGA2,ITGA6,KCNH2,KCNJ2,KIF22,KIF2C,KLK3,KPNA2,LAMC3,LMOD1,Ly6a (includes others),Marcks,MME,MRAS,MYC,MYO1B,MYOM1,NEK2,NKX3-1,Nrgn,NUSAP1,PBK,PDE9A,PDGFRA,PER1,PGR,PLAT,PLK1,…	763 (23)
AKT1	-0.689	kinase		0.997	1.42e-13	ABCB1,ACTA2,ACTC1,ANKH,ASS1,AURKB,BCL2,BIRC5,BMP2,CCL5,Ccl6,CD74,CDKN1A,CKS2,COL4A1,CXCL6,FABP5,FASN,FN1,FSTL1,FXYD5,GATM,HIPK3,HMGB2,IGF1R,IGF2,IGFBP5,IL6,IRS1,IRS2,KDR,KLF15,LAMB1,LCN2,ME1,MMP2,MYC,MYH10,MYH11,MYOCD,NDC80,NFATC2,NOX4,NQO1,PCOLCE,PDCD1,PDGFRA,PDGFRB,PGR,PPARG,PTGS2,RAMP3,RHOB,SCD,SNAI1,SORT1,SPP1,THBS1,THBS2,TIMP1,TK1,TYMS,UBE2C,UNC5B,VCAN,VEGFA	649 (22)
FOXM1	0.078	transcription regulator	Activated	3.346	1.78e-13	ACE,ANXA1,AURKB,BIRC5,CCNB1,CCNB2,CDC20,CDCA2,CDCA8,CDK1,CDKN1A,CDKN3,CENPA,CENPE,CENPF,CKS2,FLT1,FZD1,GTSE1,HIST1H2BG,IL6,KDR,LAMA4,LOX,MKI67,MMP2,MYC,NEK2,PCNA,PLAUR,PLK1,PRC1,PTCH1,SFRP1,SNAI1,STMN1,TOP2A,TWIST1,VCAN,VEGFA,ZEB2	798 (27)
TGFB3	-0.342	growth factor		-1.437	1.8e-13	ACTA2,ACTG2,ADAM12,BCL2,CDH6,CDKN1A,COL1A1,COL1A2,COL3A1,COL5A1,ELN,ETS1,FN1,GJA1,HTRA1,ITGB3,LTBP2,LTC4S,MAPK11,MICAL2,MMP2,PLAUR,PLK1,PLOD2,PTHLH,S1PR3,SCD,SDC3,SKIL,SMAD7,SNAI1,THBS1,TNC,TNS1,TSPAN13,VEGFA,ZEB2	626 (18)
bleomycin		chemical drug		0.246	1.95e-13	ACTA2,ANGPT2,BCL2,BMP1,Ccl2,CCL5,CD68,CDKN1A,COL1A1,COL1A2,COL3A1,EGFR,ELN,FABP4,FGFR1,FN1,FOSL1,FRZB,FZD1,GAB2,HBEGF,HEY1,IL13RA1,IL6,KLF15,LGALS3,LOX,LTBP1,LTBP2,MAPKAPK2,MIF,MMP2,MRC1,MYC,NFATC2,PCNA,PLAT,PRPF19,Retnla,S100A4,SFRP1,SFRP2,SMAD1,SPHK1,SPP1,THBS1,THBS4,TIMP1,TIMP2,UBE2C,UBE2T	710 (20)
carbon tetrachloride		chemical toxicant		-0.923	1.97e-13	ACTA2,AK4,AMY2B,ASS1,Calm1 (includes others),Ccl2,CCL5,CDKN1A,COL1A1,COL1A2,COL3A1,CXCL6,DAGLA,DCLK1,DES,DHFR,FGFR4,FN1,GADD45A,Gsta4,IGFBP5,IGFBP6,IL13RA1,IL6,ITGA8,KDR,ME1,MMP2,Mt1,Mt2,MYC,NAPEPLD,NQO1,PCNA,PDGFC,PDGFD,PDGFRA,PDGFRB,PPARG,PTGS2,S100A6,S1PR2,S1PR3,SKIL,SMAD1,SMAD3,SMAD7,SMURF2,SORD,SPHK1,SPP1,TGFA,TIMP1,TIMP2	773 (19)
PPARG	2.334	ligand-dependent nuclear receptor		-1.175	5.35e-13	ABCG2,ACTA2,ADRB2,ALOX12,ANGPTL4,APH1B,ATP2A2,BCL2,BIRC5,BRCA1,Ccl2,CCL5,CD36,CDKN1A,COL1A1,COL1A2,CXCL3,CXCL6,CYCS,CYP4B1,DLK1,EGFR,EGLN3,EIF4EBP1,ELOVL6,EPAS1,ETS1,FABP4,FABP5,FASN,FN1,FOSL1,FST,FZD1,GPAM,H6PD,HMGCS2,HR,HSD3B7,HYOU1,IGFBP3,IGFBP5,IGFBP6,IGFBP7,IL33,IL6,INSIG1,INSR,IRS1,IRS2,KLK11,KRT18,LPL,ME1,MKI67,MKNK2,MRC1,NOX4,NR1H3,NR2F2,OLR1,PACS1,PC,PCNA,PDE3B,PFKFB3,PID1,PLIN4,PPARG,PT…	561 (21)
SMARCA4	-0.046	transcription regulator		1.542	6.6e-13	ABCB1,ABLIM3,ACE,ACTA2,AGR2,ANO1,ARRDC4,ASNS,BATF,BCL2,BIRC5,C1orf54,CD74,CDKN1A,COL1A1,COTL1,CSNK1G2,CYP1A1,CYP4B1,DES,DHFR,EBF1,ELOVL6,EPHA1,EREG,FABP4,FBLIM1,FGFR2,FN1,GADD45A,GADD45G,GCHFR,GMFG,GPM6A,GPR68,GSTO1,HAPLN3,HEPH,HEY1,HFE,HNMT,HPGD,HS3ST1,IFI16,IFI30,IFITM3,IGFBP5,IGFBP7,IL6,INHBA,ITGA7,KCNJ2,KDR,KHDRBS3,KLK3,KRT18,LGALS3,LMNA,LOX,LRMP,MMP2,MN1,Mt1,MYC,MYH11,NOSTRIN,NR2F2,NRP1,NRP2…	742 (25)
IL1B		cytokine	Activated	4.232	6.96e-13	A4GALT,ABCG2,ACPP,ACTA2,ADAMTS4,ADAMTS5,ADM,ADRB2,ALPL,ANGPTL4,ANKH,ANTXR1,ANXA1,ASS1,ATP1A1,ATP2A2,BCL2,BGN,BMP2,C1R,Ccl2,CCL5,Ccl7,CD74,CDKN1A,CFB,COL1A1,CSF2RB,CTSF,CXCL3,CXCL6,Cyb5r3,CYP1A1,DAB2,DBI,DUSP5,EFNA1,EGLN3,EIF4EBP1,ELN,ENPP2,EPAS1,ERBB2,FABP5,FGFR2,FGFR3,FLT1,FN1,FOSL1,FST,FURIN,G0S2,GADD45A,GCHFR,GJA1,GRB7,HBEGF,HMGA1,HSD11B1,HSPG2,IFI16,IGFBP3,IGFBP5,IGFBP6,IL10RA,IL33,IL6,IL7,IN…	747 (20)
NRAS	-0.068	enzyme		-1.157	7.63e-13	2810025M15Rik,AKAP12,ANXA8/ANXA8L1,BCL2,CCL5,CCNB1,CCNB2,CDC20,CDKN1A,CDKN3,CENPA,CLEC11A,COL1A2,DUSP2,EPAS1,ETS1,EXO1,FBLN2,FHL1,FN1,GJA1,HTRA1,IFI16,IL13RA1,IL6,ITGA2,KCTD12,KDR,KIF22,KIF2C,LBP,LCN2,MEST,MKI67,NCAM1,NCF2,NQO1,NSG1,PERP,PLEKHO1,PTGS2,RBM38,RHOB,RPS6KA2,SLC2A4,SPC25,TRAIP,UBE2C,USP18,VEGFA	689 (21)
KDM1A	-0.312	enzyme		1.627	7.63e-13	ADCY5,ADM,ASF1B,BMP2,BRCA1,C1orf116,CDA,CDKN1A,CENPF,CENPK,CHN1,COL1A1,COL1A2,EBF1,FASN,GATA4,GLT8D2,HAS3,Hbb-b1,HSD11B1,IGF1R,KHDRBS3,KLF2,KLK3,KRT18,LATS2,LCK,MYC,MYO1B,NKX3-1,PSAT1,PTPRB,RARB,RARG,RASGRP3,RCOR2,SCD,SERPINB1,SFRP1,SFRP2,SFRP4,SMAD7,SMURF2,SNAI1,STEAP3,SYBU,SYNPO,TMCC3,TRIP13,UBE2H	716 (24)
TCF3	-0.007	transcription regulator	Inhibited	-2.371	8.18e-13	ADA,ALCAM,ASF1B,AURKA,BID,BIK,BIRC5,BUB1,CCNB1,CCNB2,CD5,CDC20,CDCA3,CDH5,CDK1,CDKN1A,CDKN3,CEP55,CERK,CKAP4,CKS2,COL1A1,DTX1,EBF1,ECT2,EIF4EBP1,EPOR,ESCO2,FGFR2,FGFR3,GADD45A,GPAM,HMGB2,HMMR,HS3ST1,HSD11B1,HYOU1,IFI16,KIF2C,KIF4A,Ly6a (includes others),MKI67,MYC,NCAPG,NDC80,NEK2,NELL1,NFIL3,NTRK2,NUSAP1,PAFAH1B3,PLAC8,PRC1,RACGAP1,RGS16,RRM2,SEMA3F,Serpina3g (includes others),SERPINB1,SLC12A2,SM…	454 (18)
WNT3A		cytokine	Inhibited	-2.09	9.69e-13	ACTA2,ADAMTS4,ALPL,ARHGAP18,ARRDC4,BCL2,BCL9L,BGN,BMP2,C2orf40,CAMK4,CD68,CLEC11A,COL1A1,DKK2,DLK1,EPAS1,FABP4,FMOD,FN1,Fndc1,FZD1,GADD45G,GAP43,GAS1,GATA4,HAS3,HEY2,IGFBP5,IL6,IRS1,IRS2,KCTD12,KDR,LCN2,LRRC17,Meis1,MYC,NCAM1,OGN,PDGFRA,PLD1,PNPLA3,PPARG,PTGS2,PTH1R,RAPSN,SERPINB1,SFRP2,SLC7A2,SPRY1,TBX3,TCF4,THBS1,THY1,TNC,Tnfsf9,TWIST1,VEGFA,WIF1	658 (20)
NFKBIA	0.513	transcription regulator		0.538	9.89e-13	ADAMTS5,ATP11A,AURKB,AXL,BCL2,BID,BMP2,BOK,Ccl2,CCL5,Ccl7,CCNB1,CDH13,CDKN1A,CH25H,COL1A2,COL3A1,CSK,CTSF,CXCL3,CXCL6,CYP1B1,CYP7B1,DAG1,ENPP2,ERBB2,EREG,FGFR4,FN1,FOXC2,FOXF2,FSCN1,FZD7,GADD45A,GADD45G,HEY1,HMGA1,HOXA10,HPSE,IFI16,IGF2,IGFBP6,IL33,IL6,ITGA2,JDP2,KCNH2,KRT18,LCN2,LYNX1,MGMT,Mt1,Mt2,MYC,NFKBIE,NGF,NOD2,NRK,OGN,PCNA,PIM1,PLAT,PTGS2,PTPRZ1,RCAN1,RGS16,RGS4,SEMA3C,SEMA3F,SFRP1,SLC12A…	723 (17)
SP1	-0.039	transcription regulator		-0.851	1.29e-12	ABCB1,ACTA2,ADA,AKAP12,ALOX12,ALPL,ANK1,ANKH,ASNS,ASS1,ATP2A2,BCL2,BIRC5,CBS/CBSL,Ccl2,CCL5,CDK1,CDKN1A,Ces2c,COL1A1,COL1A2,CXCL3,CYP1B1,CYP7B1,DBF4,DHFR,DLC1,EGFR,EPOR,EREG,FASN,FGFR1,FGFR4,FLNA,FLT1,FN1,FOSL1,FOXF2,GJA1,HBEGF,HDC,HMGA1,HPSE,IFITM3,IGF1R,IGF2,IGFBP3,INSR,ITGA2,ITGB3,ITGB5,KDR,KRT18,LPL,LTBP3,MAPK8IP1,Marcks,MEOX2,MMP2,MRC1,MST1R,Mt1,MYC,MYH11,NCF2,NOX4,NPR1,NPTXR,PDGFC,PDGFRA,PD…	731 (25)
cycloheximide		chemical reagent		1.316	1.37e-12	ABCB1,ACTC1,ADM,ASS1,BMP1,BRCA1,CDKN1A,COL1A1,COL5A1,CXCL3,CYP1A1,DIO2,EGFR,FGFR1,FN1,FST,GADD45A,GADD45G,GAP43,GAS7,GJA1,GNAI1,HBEGF,HSD11B1,IGF2,IGFBP5,IGFBP6,IL6,IRS2,ITGB3,ITGB5,KLK3,LCN2,LPL,MME,MMP2,Mt1,MYC,NFKBIE,NQO1,NR1H3,OGN,OLR1,PDGFRA,PDGFRB,PERP,PFKFB3,PGR,PLAT,PLAUR,PLK1,PPARG,PRKAR2B,PSEN2,PTGIS,PTGS2,PTHLH,RARG,RCAN1,RGS2,RHOB,RHOBTB2,RSAD2,SCD,SPP1,TGFA,THBS1,THRA,THRB,TIMP1,TK1,…	797 (19)
Tgf beta		group		-1.05	1.43e-12	ACTA2,ADAM12,ANGPTL4,ANKH,AOC3,AXIN1,BCL2,BGN,Ccl2,CCL5,CDKN1A,COL1A1,COL1A2,COL4A1,COL5A1,COL6A2,CXCL3,DAB2,FBLN2,FN1,FSCN1,FST,FSTL1,FSTL3,FURIN,HEY1,HSPG2,IGFBP3,IGFBP5,IL6,ITGB3,LOX,MAF,MIF,MMP2,MN1,MYC,NCOR2,NOX4,NR4A2,PDCD1,PLAT,POSTN,PTGS2,PTHLH,RHOB,SEC14L2,SKIL,SLFN12L,SLIT3,SMAD6,SMAD7,SNAI1,SPP1,TGFA,TGFBI,THBS1,TIMP1,TIMP2,TNFRSF11A,TSLP,VEGFA	781 (19)
JUN	-0.406	transcription regulator	Activated	2.825	1.79e-12	ABCB1,AKAP12,ALOX12,ANXA1,ASNS,AXL,BRCA1,Ccl2,CD68,CDC20,CDK1,CDKN1A,COL1A1,COL1A2,CXCL3,CYCS,CYP1B1,DIO2,DUSP5,EGFR,EPHX2,EREG,FABP4,FBLN5,FN1,FOSL1,FOXC1,FRZB,GADD45A,GAP43,GJA1,HEY1,HMGA1,HPGD,IFI16,IGF1R,IGFBP3,IGFBP6,IGFBP7,IL6,IRS2,KDR,LBP,LGALS3,LMNA,LMO1,LPAR1,LTBP1,MAF,MMP2,MTHFR,MYC,NCAM1,NCF2,NGF,NQO1,NRCAM,NTS,OXTR,PGR,PLAUR,PTGS2,PTHLH,RARG,RHOB,S100A10,SCD,SLC19A1,SLC6A6,SMAD7,SNCG,…	652 (18)
ERK1/2		group	Activated	3.075	2.3e-12	ANGPT2,APH1B,BCL2,BMP2,BRCA1,Ccl2,CCL5,CDK1,CDKN1A,CLEC11A,COL1A1,COL3A1,CXCL3,CXCL6,ECE1,EFNB2,EIF2AK3,EMCN,ETS1,FABP4,FGFR2,FLT1,FN1,FOSL1,FZD1,GJA1,HBEGF,HMGA1,HPGD,IGF1R,IGFBP3,IL17RD,IL6,IRS2,ITGA2,ITGB3,KCNH2,KIF2C,LEPR,MAPK8IP1,mir-24,MMP2,MYC,MYOCD,NOX4,PCNA,PDGFRA,PLAUR,POSTN,PRKCZ,PTGER4,PTGS2,PTN,PTPRE,RAB4B,RAD51,S100A6,SBSN,SKIL,SNAI1,SPP1,TIMP1,TIMP2,TSLP,VCAN,VEGFA	621 (20)
PTH		other		0.115	3.15e-12	ALPL,ANK3,ATP2A2,BCL2,BMP2,CARD14,Ccl2,CDKN1A,COL1A1,COL1A2,EFNB2,EGFR,EIF2AK3,FN1,GJA1,IGFBP3,IGFBP5,IL33,IL6,KIF26A,LMNA,MME,MMP2,NFIL3,NR4A2,PALM,POSTN,PTGS2,PTH1R,RGS2,SFRP2,SFRP4,SLC2A4,SLC43A2,SMAD3,SMAD7,SORT1,SOST,SPP1,STC1,TFPI2,THBS4,TNS1,WIF1	748 (22)
actinomycin D		biologic drug		0.357	3.44e-12	ADM,ASS1,ATP1A1,BCL2,BIK,BIRC5,BRCA1,CDKN1A,CLEC11A,COL1A2,CPD,CYP1A1,EGLN3,EPAS1,ETS1,FASN,FGFR1,FLNA,FN1,GADD45A,HBEGF,IGF1R,IGFBP5,IL6,IRS1,IRS2,LPL,MMP2,Mt1,MYC,NGF,NTRK2,PDE3A,PERP,PFKFB3,PLAUR,PPARG,PTGIS,PTGS2,PTH1R,PTHLH,RAD51,RGS2,RGS4,SDC3,SFRP1,SKIL,SMAD7,SPHK1,SPP1,TGFA,THRA,THRB,TRAF1,VEGFA,VEGFC	736 (19)
thioacetamide		chemical toxicant		1.098	3.57e-12	ACOT2,ACTA2,AKAP12,ANXA1,ASNS,B4GALT6,BGN,BRCA1,COL1A1,COL1A2,COL3A1,CTSF,CYP1A1,DKK3,EDNRB,ELN,ERBB2,FBLN5,FGFR3,FSTL1,FXYD6,GATM,GNG11,IGFBP3,IL6,ITGA7,LAMC2,LCN2,LGALS3,LOX,LTBP1,LYVE1,MMP2,MYC,PCOLCE,PCSK6,PDGFD,PDGFRA,PIK3R2,POR,PRELP,PSMD10,PTGS2,PTPRS,RCN1,S100A10,SMAD7,SPARCL1,SPP1,ST3GAL2,STEAP3,TCF4,TES,TIMP1,TIMP2,TSPAN8,UPP1	773 (13)
PTGER2		G-protein coupled receptor	Activated	3.694	4.33e-12	ASPM,AURKA,BRCA1,CCNB2,CDKN3,CENPE,CENPF,CEP55,CKAP2L,CKS2,DEPDC1,ECT2,HDC,IL6,KIF18B,KIF22,KIF2C,MKI67,NEK2,NUSAP1,PBK,PGR,PIM1,PLK1,PRC1,PTGS2,RACGAP1,SPP1,THBS1,TIMP1,TIMP2,TPX2,TTK,VEGFA	711 (22)
HIF1A	-0.597	transcription regulator		1.487	4.83e-12	ABCB1,ACTA2,ADM,AKAP12,ANGPTL4,ANKRD37,ASNS,ATP2A2,AURKA,AXL,BCL2,BGN,BID,BIRC5,BMP2,BRCA1,CA9,Ccl2,CCL5,CD36,CDKN1A,CXCL3,DTX1,EDNRB,EGFR,EGLN3,EPAS1,EPOR,ERBB2,EREG,ETS1,FHL1,FLT1,FN1,FSCN1,FURIN,FZD2,GATA6,GCHFR,GJA1,IGF2,IGFBP3,IGFBP5,IL17RA,IL6,IRS2,ITGB3,KRT18,LOX,MGMT,MIF,MMP2,MST1R,MYC,NOX4,NRARP,NRN1,NTRK2,PELP1,PFKFB3,PGF,PLAC8,PLAUR,PLOD2,PTGIS,PTGS2,RAB20,RET,SFRP1,SLC16A3,SLC2A4,SMAD…	678 (16)
IL10RA	4.226	transmembrane receptor	Inhibited	-2.271	4.96e-12	ABAT,ABCB1,ANKH,ANO1,ARL5A,ASS1,B3GNT7,BCL2,BMP2,BOC,CACHD1,CBS/CBSL,CCL5,CD1D,CD36,Ces2g,CFB,CYFIP2,DPT,EDNRB,EFEMP1,EMP2,ENTPD5,ETV1,FABP5,FHL1,FN1,FSTL1,Gsta4,HMCN1,HPGD,HPSE,IFI16,IL2RG,IL6,INHBA,KLK3,LCN2,LRG1,LRIG3,LTC4S,Ly6a (includes others),NPL,NR1H3,OGN,OLR1,PAM,PCOLCE,PDCD1,PDE2A,PDGFRA,POSTN,Retnla,RIPK3,RSAD2,SELENBP1,Serpina3g (includes others),SLAMF8,SLC16A3,SLC2A6,SLCO2B1,SPON1,ST…	427 (12)
EZH2	0.296	transcription regulator		1.338	5.65e-12	ADRB2,ALPL,BCL2,BMPR1B,BRCA1,C15orf48,Ccl2,CCL5,CDKN1A,CHRM3,CLEC3B,COL4A1,CPD,CRISPLD2,CYP1B1,DENND2A,DUSP5,EFNA1,EGFR,EPAS1,EPDR1,EPHA1,ERBB2,FBLN1,FLT1,FOXF2,FRZB,FZD1,GATA4,GBX2,GPR68,GRIK5,HOXA10,HOXB6,HOXD10,HOXD8,HOXD9,Ifi27l2a/Ifi27l2b,IGFBP3,IL10RA,IL6,KLF2,KLK3,LAMC2,LATS2,LCN2,Meg3,MMP2,MYC,NME1,OXTR,PDGFRA,PER1,PGR,PPARG,PPP1R12C,PRG2,PRRT4,PTGS2,PTN,RAC3,Rian,S100A4,SERPINA1,SFRP2,SF…	686 (24)
U0126		chemical - kinase inhibitor		-0.812	5.86e-12	ABCB1,ABCG2,ACTA2,ADAMTS4,ANGPTL4,AQP1,BCL2,BIRC5,BMP6,BRAP,CA9,Ccl2,CCL5,CD36,CDH5,CDKN1A,CELSR2,COL1A1,COL4A1,CXCL3,CYP1A1,CYP1B1,DAB2,DES,DUSP5,DYRK1B,EDNRB,EGFR,EIF2AK3,EIF4EBP1,ENPP2,EREG,ETS1,ETV1,FABP4,FGFR2,FMO3,FN1,FOSL1,FURIN,G0S2,GJA1,GP1BA,Gsta4,HAPLN1,HBEGF,HPGD,IL6,INHBA,ITGA6,ITGB5,JDP2,KDR,KLK3,LAMB1,LPL,MMP2,MYC,MYO7A,NR4A2,NRN1,PER1,PGR,PLAUR,PLD1,PLK2,POSTN,PPARG,PRELP,PTGS2,PT…	733 (18)
HNRNPA2B1	0.174	other		-0.391	6.78e-12	ABCB1,ARSJ,CACNB2,CADM1,CRIP1,DCLK1,DDR1,FHL1,FN1,FSCN1,FZD8,GJA1,GPRC5B,HNMT,HYAL1,IL6,KCTD12,LEPR,LPAR1,MEST,MFHAS1,MYC,NRCAM,NTRK3,NTS,PDGFC,PLOD2,RASSF8,ROR1,S1PR3,SERPINA1,SLC2A4,SNAI1,SRPX,TFPI2,TWIST1,UBASH3B,UBXN10,VCAN,VIL1,WWOX	547 (12)
DMD	-0.539	other		-0.18	6.91e-12	AIG1,ATP1B2,BGN,CACNA2D1,CASQ1,CDH13,CDKN1A,CENPM,CLIP4,Cmah,CNKSR1,COL1A2,COL23A1,COL3A1,CYFIP2,DAG1,DES,GAN,GATM,GJA5,HTR2B,IGF2,IP6K3,KCNK3,KCNMA1,KRT18,LDB3,LRCH1,Marcks,NOG,OBSCN,POSTN,PPP1R3C,PROX1,PYGM,RAP1GAP2,S100A10,SERPINA1,SERPINB1,SGCG,SGSH,SLC2A4,SNTA1,SORT1,ST3GAL6,STARD10,SUSD4,SYNC,SYNM,TMEM108,Tmsb4x (includes others),XK
GDF2		growth factor		-1.442	8.48e-12	ABCG2,ANKH,ATP1A1,BID,CDH6,COL1A1,COL9A1,DLK1,EFNB2,EGFR,ENPP2,FGFR3,FMOD,FOXC2,HTRA1,LYVE1,MYC,NGF,NOG,NRCAM,NRP1,POSTN,PROX1,RASL11B,SEMA3C,SLC6A6,SMAD1,SMAD6,SMAD7,SPARCL1,SPP1	287 (9)
IL6	0.966	cytokine	Activated	2.639	1.11e-11	ABCG2,ADAMTS4,ADAMTS5,ADM,ANXA1,ATP2A2,AXIN1,BATF,BCL2,BGN,BIRC5,BMP2,BMP6,BUB1,Ccl2,CCL5,CCNB1,CCNB2,CD36,CD68,CD74,CDC20,CDK1,CDKN1A,CDKN3,CENPA,CENPE,COL1A1,COL3A1,COMP,CSF2RB,CXCL3,CXCL6,CYP1A1,CYP1B1,DHFR,EGFR,EGLN3,ENPP2,EREG,EXO1,FAH,FN1,FOSL1,FRRS1,FSCN1,GADD45A,GADD45G,GAP43,GP1BA,Gsta4,HFE,HPGD,IFI16,IFITM3,IGF2,IGFBP3,IGFBP5,IGFBP6,IL6,IL7,IRS1,ITGB3,ITGB5,KDR,KIF22,KIF2C,KLK3,KRT18,LB…	883 (21)
rosiglitazone		chemical drug		-1.171	1.16e-11	ABCC9,ADA,ANGPTL4,AOC3,ATP1A1,BCL2,BRCA1,Ccl2,CCL5,Ccl7,CD1D,CD36,CD68,CDKN1A,COL1A1,CYCS,CYP1A1,DIO2,EGFR,EGLN3,EPHX2,ETS1,FABP4,FABP5,FASN,FGF13,FN1,FOSL1,GPAM,H6PD,HPGD,HSD11B1,HTR2B,IGF2,IGFBP5,IGFBP6,IL6,INSIG1,INSR,IRS1,IRS2,KLF2,KLK3,KRT18,LCN2,LOX,LPL,LRG1,LRP1,MAN1C1,NGF,NOX4,NR1H3,OLR1,PC,PCNA,PDGFRA,PLCL1,POSTN,PPARG,PTGS2,RARB,Retnla,RGS2,SCD,SEMA3C,Serpina3g (includes others),SLC27A2…	770 (24)
CDKN1A	1.432	kinase	Inhibited	-3.02	1.45e-11	ACTA2,ASPM,AURKA,AURKB,BCL2,BIRC5,BRCA1,BUB1,CCNB1,CDC20,CDK1,CDKN1A,CDKN3,CENPF,CEP55,CIT,COL1A2,DLGAP5,EXO1,FN1,HMGB2,IL6,INHBA,ITGB3,ITGB5,KIF2C,KRT18,LGALS3,MAF,MKI67,MYC,NUSAP1,PBK,PCNA,PLK1,PLK2,PRC1,RACGAP1,RAD51,SMC2,SMC4,SSPN,STMN1,TGFA,TOP2A,TPX2,TTK,TYMS,UBE2C,UBE2T,VEGFA,VGLL4	536 (16)
KLF2	-0.685	transcription regulator		-1.467	1.58e-11	ACE,ADM,ANGPT2,ASS1,Ccl2,CCL5,Ccl7,CD36,CDKN1A,COL4A1,CYP1B1,EFNA1,ELN,EPAS1,FABP4,FBLN1,FLT1,GADD45A,GATA4,HPSE,IGF2,IL2RG,IL6,ITGB3,ITGB5,KDR,LBP,LEPR,LTC4S,MYC,MYH10,NQO1,PDPN,PGF,PLOD2,PPARG,PTGIS,PTGS2,PTHLH,PTPRJ,SEMA3F,SMURF2,TCF4,TFPI2,THBS1,TIMP1	656 (18)
doxorubicin		chemical drug		0.893	1.75e-11	ABCB1,ABCB9,ABCG2,ACTC1,ADM,ANXA1,ASNS,ATP2A2,AURKA,AURKB,BCL2,BIK,BIRC5,BRCA1,Ccl2,CCNB1,CCNB2,CDK1,CDKN1A,CDKN3,CENPA,CKAP4,COL3A1,CXCL6,DES,DUSP5,EGFR,EPOR,ERBB2,EXO1,FBLN1,GADD45A,GATA4,HBEGF,IGFBP6,IGFBP7,IRF5,KRT18,LAMC2,LCN2,LGALS3,MMP2,MRC1,MYC,NCAM1,NOX4,NQO1,OSGIN1,PCNA,PDE3A,PERP,PINX1,PLK1,PRC1,PRKAA2,PTGS2,Ptprv,RAD51,RCN1,RELN,RGS16,RRM2,S100A10,SDC2,SLC6A6,SMAD3,SMAD7,SNAI1,SPHK1,S…	722 (21)
HTT	-0.41	transcription regulator		0.32	1.94e-11	ACOT2,ACTA2,ADAMTS2,ADAMTS4,ADAMTS5,ADCY5,ADORA2A,AKAP12,AQP1,ATL2,ATP1A1,ATP2A2,BAIAP2,BCL2,BID,BMP1,C1R,C2orf40,CACNA2D3,CAMK4,CCL5,CD74,CD9,CDKN1A,CIT,COL16A1,COL4A1,COL6A1,COL6A3,CORO2B,CYCS,CYFIP2,DIO2,DKK3,DUSP5,EBF1,EDNRB,ENPP2,ETV1,FASN,FGFR1,FHL1,FN1,FOSL1,FXYD6,GADD45G,GAP43,GAS7,HAPLN3,HBA1/HBA2,Hbb-b2,HBEGF,HMGA1,HMGB2,HOXB9,IFI16,IGF2,IGFBP5,KCNAB1,KCNB1,KCNC4,KCNJ2,KCNK3,KCTD17,LOX,…	820 (24)
NUPR1	0.067	transcription regulator		-0.53	1.95e-11	ADAM22,ADM,ADRB2,AEN,AKAP12,ANK1,ANK3,AS3MT,ASPM,ATP6V0A1,AURKA,AVPI1,BRCA1,BUB1,C8orf58,CCNB2,CD68,CDCA2,CDCA3,CDCA8,CENPL,CERK,CKAP2L,COL1A2,COL3A1,CXCL3,DAGLA,DIPK2A,DUSP5,DUSP8,EREG,ETS1,ETV1,EXO1,FUT11,FZD8,GAB2,GADD45A,GCNT2,GPR1,GTSE1,HBEGF,HFE,HIST1H2BB,HIST1H2BM,IGF1R,IL13RA1,IP6K2,IRS2,KIF18A,KIF23,KIF2C,LARS2,LHFPL2,MAN2B2,MKI67,MYC,MYH10,MYO18A,NAPEPLD,NEIL3,NFIL3,PFKFB3,PIM1,PLK1,PM2…	524 (12)
FSH		complex		0.562	2.07e-11	4930486L24Rik,ACPP,ACTA2,ACTG2,ACTN1,ADCY7,ADM,AKAP12,ALPL,ATP2A2,ATP2B1,ATP9A,AXL,BMPR1A,BMPR1B,CAMK4,CAP2,CDK16,CH25H,CLEC11A,CYFIP2,DAB2,EFNA1,EGFR,EREG,FGFR1,FOSL1,FST,GATA4,GATA6,GPRC5B,HSD11B1,IGF1R,IGFBP3,IL6,INHBA,ITGB5,KRT18,LOX,MBD2,MICOS10-NBL1/NBL1,MMP2,MN1,MYC,NEO1,NPPC,NPY1R,PCNA,PCSK6,PDXK,PGR,PLAT,PLCL1,PLK2,PPP1R2,PTGS2,PTPN21,PTPRE,RGS16,RGS4,RGS5,RGS7,RHOB,SMAD1,SMAD6,SMAD7,TFP…	836 (21)
TCF4	1.213	transcription regulator		0.276	2.54e-11	ADA,ADAMTS9,AEN,ALCAM,ANGPTL4,ASF1B,B4GALT1,BIRC5,BMPR1A,CADM1,CCNB2,CD9,CDC20,CDCA3,CDK1,CDKN1A,CDKN3,CEP55,CKAP4,CKS2,DACH1,DPT,ESCO2,EYA1,FN1,GRB14,GRB7,HMGB2,HMMR,HOXB9,HSD11B1,HTR2B,HYOU1,IFI16,IGF2,IGFBP3,IGFBP5,INHBA,IRS1,LAMC2,LRP1,Ly6a (includes others),MKI67,MPV17L,MYC,NCAPG,NCOR2,NDC80,NEK2,NELL1,PLAC8,PLAUR,PLK2,POP7,PPARG,PRC1,RACGAP1,RRM2,SDC2,Serpina3g (includes others),SERPINB1,SM…	681 (20)
NKX2-3	-1.459	transcription regulator		-0.134	2.84e-11	ACTA2,ADAMTSL2,ADM,ALPL,ANGPT2,ANGPTL4,ANKRD37,AOC3,ASNS,BMP2,CBS/CBSL,CCNB2,CD300LG,CD36,CD68,CDKN3,CENPW,CEP55,CERK,DCLK1,EMCN,F2RL3,FLRT2,GASK1B,HEY1,HEY2,HFE,HMMR,KLF2,LGMN,LYPD1,MMRN1,MYH11,PLD1,POSTN,PSAT1,PTGS2,PTPRE,REEP1,RTP4,SEMA3A,SMAD7,SRPX,SRPX2,TFPI2,TMEM100,TNFAIP8L1,UNC5A,UNC93B1,USP18,XAF1
MYC	0.968	transcription regulator	Activated	2.783	3.48e-11	ABCA2,ABCB9,ACTN1,ADM,AKAP12,ALCAM,ANGPT2,AOPEP,AQP1,ARHGAP22,ASNS,ASS1,AURKB,AXIN1,AXL,BCL2,BCR,BIRC5,BMPR1A,BRCA1,BUB1,Ccl6,CCNB1,CCNB2,CD9,CDC20,CDCA7,CDK1,CDKN1A,CKS2,CLEC3B,COL1A1,COL1A2,COL3A1,COL4A1,COL5A1,COL6A3,CPD,CRIP1,CSPG4,CSTB,CYCS,CYFIP2,DBI,DCTPP1,DHFR,DSP,DUSP2,DUSP5,EBF1,EFEMP1,EIF4EBP1,EPHB3,ERBB2,EXOSC8,FABP4,FABP5,FADS2,FASN,FBLN2,FBLN5,FGFR1,FLNA,FMOD,FN1,FOSL1,FRZB,FSTL1,GA…	626 (21)
F2		peptidase		0.712	3.71e-11	ACTA2,ADAMTS9,ANGPT2,ANGPTL4,B4GALT1,Ccl2,CD68,CDKN1A,CKAP4,COL1A1,COL4A1,COTL1,CXCL3,DKK3,ECE1,EDNRB,EREG,ETS1,F2RL3,FHL1,FLT1,FN1,FOSL1,HBEGF,HDAC9,HMGA1,HOXD10,IGF1R,IGFBP5,IL6,KDR,MEOX1,MFHAS1,MIF,MMP2,MTSS1,MYC,MYH11,NCF2,PDGFRA,PGR,PLAT,PLAUR,PTGS2,RCAN1,RHOB,S100B,SLC16A5,SLC2A6,SLIT2,TEK,TFPI2,THBS1,TIMP2,TRAF1,TRPC1,TRPC3,VEGFA	734 (18)
PTEN	-0.518	phosphatase		-1.825	3.72e-11	ADM,ANGPT2,ANXA1,ASPH,AURKA,AURKB,BCL2,BIRC5,Ccl2,CCL5,CCNB1,CCNB2,CDC20,CDH5,CDKN1A,CELSR1,CKS2,DHFR,DHRS11,DTX1,EFNB2,EGFR,EIF4EBP1,EPAS1,ERBB2,ETS1,FABP4,FASN,FGFR1,FGFR2,FGFR3,FGFR4,FLT1,FN3K,G0S2,GJA5,GNG2,GPR157,GPR160,GPRC5C,Hbb-b1,HCN2,HOXA10,IFI30,IGF1R,IGF2,IGFBP3,IGFBP5,IGFBP6,IL6,INPPL1,IRS2,KDR,LGALS3,MAN1C1,MCAM,MKI67,MME,MMP2,MMP23B,MRC1,MYC,NCAM1,NFIL3,NHP2,NKX3-1,NQO1,NR2F2,NR4A2…	700 (23)
SMAD3	-0.644	transcription regulator		-0.815	3.74e-11	ACTA2,ADAM12,BCL2,BGN,BMP2,BMP6,Ccl2,CDH5,CDKN1A,COL1A1,COL1A2,COL3A1,COL6A1,COL6A3,CXCL3,DES,ELN,EREG,FN1,FST,FSTL3,FZD8,HBEGF,HEY1,IL6,ITGB5,KLK3,LPAR1,Ly6a (includes others),MYC,PC,PCNA,PDCD1,POR,PTGS2,PTHLH,RHOB,S1PR3,S1PR4,SKIL,SMAD1,SMAD3,SMAD7,SNAI1,SPHK1,SPP1,TBX3,TGFA,THBS1,TIMP1,TNC,VEGFA,VEGFC,VPREB1,ZEB2	695 (18)
FOXO3		transcription regulator		0.1	3.81e-11	ALDH3A1,ANGPT2,ANXA1,ATP6V0D2,AURKA,BCL2,BIRC5,BMP2,CCNB1,CCNB2,CDC20,CDCA8,CDH5,CDKN1A,CDKN3,CEP55,CH25H,COL4A1,DLGAP5,EDNRB,EIF4EBP1,EXO1,FABP4,FABP5,FASN,FBXO5,FGFR2,FLT4,FMOD,FN1,FOXC1,GADD45A,GRB14,HMGCS2,IGF1R,IGFBP7,IL6,INHBA,IP6K2,IRS2,KIF2C,LCN2,MCAM,MKI67,Mt1,Mt2,MYC,MYOCD,NPNT,NRP2,PBK,PCNA,PDE3B,PLK1,PRKAA2,PTPRB,S1PR3,SBSN,SLC1A4,SLIT2,SNAI1,TPX2,UBE2C,UCP2,ULK1,VEGFA	787 (25)
D-glucose		chemical - endogenous mammalian		-0.73	4.93e-11	ABCB1,ACE,ACTA2,ACTG2,ACTN1,ADA,ADCY5,ANGPT2,ANO1,ANXA1,AQP1,ASNS,ASS1,ATP2A2,ATP2B1,BCL2,BIRC5,BMP2,Ccl2,CCNB1,CD36,CDK1,CDKN1A,CNN1,COL1A1,COL3A1,COL4A1,CPD,DBI,DES,DTNA,EIF2AK3,ELOVL6,FABP5,FASN,FN1,FST,GATA4,GJA1,GPAM,H6PD,HAPLN1,Ifi27l2a/Ifi27l2b,IGF1R,IGF2,IL6,INHBA,INSR,IRS1,IRS2,ITGA8,KCNMB1,KDR,LAMB1,LCP1,LMOD1,LPL,LRP1,LY96,MCAM,MIF,MMP2,MRVI1,Mt1,Mt2,MUSTN1,MYC,MYH11,NOX4,NPNT,NPY1R,NQ…	804 (21)
ERK		group		1.487	5.17e-11	ACTN1,AXL,BCL2,BGN,Ccl2,Ccl7,CD1D,CDKN1A,CKS2,COL1A1,COL3A1,CXCL6,CYP1A1,DIO2,DPYSL2,EGFR,EPAS1,EREG,ETS1,FABP4,FN1,FOSL1,FST,GPRC5C,HAS3,HBEGF,HEY1,HEY2,HMGA1,IL6,IRS1,ITGB3,KRT18,LAMB1,LCN2,MCAM,MMP2,MYC,OSBPL10,PDGFC,PTGS2,RARB,RECK,RGS4,SORT1,SOST,SOX4,STK11,TGFA,THBS1,TIMP1,TRPC3,VCAN,VEGFA	624 (20)
CD44	0.014	other		-0.739	5.32e-11	ABCA2,ABCB1,ABCG2,ACTA2,ADRB2,BCL2,BGN,BIRC5,Ccl2,CCL5,Ccl7,CD36,CDH5,CDKN1A,COL1A1,COL3A1,CXCL6,Cyb5r3,ERBB2,FASN,FN1,GADD45A,HAS3,HMMR,IL6,ITGBL1,LAMB1,LGALS3,LHX6,LTBP1,LTBP2,Ly6a (includes others),MBNL3,MMP2,MYC,MYO1B,NOX4,NPNT,PTHLH,SERPINA1,SFRP2,SMAD1,SPP1,THBS1,THBS2,THY1,TNFRSF11A,TWIST1,WNT2	827 (20)
COL4A3	-1.891	other		-0.651	6.03e-11	COL1A1,COL1A2,COL3A1,COL4A1,COL4A4,COL4A5,DDR1,FN1,ITGA2,ITGB3,LAMB1,MMP2,PTGS2,TIMP1,TIMP2	629 (19)
IGF2	1.682	growth factor		1.408	7.02e-11	ARL4A,BIRC5,BMP2,Ccl2,CD36,CDK1,CDKN1A,CORO2B,CYP1B1,ELOVL6,EREG,FN1,GADD45A,GAS1,GATA6,HBEGF,HELLS,IGF1R,IGF2,IGFBP3,IGFBP5,IGFBP6,IL6,ITGB5,MYC,NGF,OGN,PIM1,PRKCQ,PTGS2,RAD51,RAD51AP1,RGS16,RHOB,RRM2,SLC2A4,SPP1,TGFBI,THBS2,THRA,TRAIP,ULK2,VEGFA	652 (21)
TGFBR2	-0.004	kinase		-0.424	8.24e-11	ACTA2,ADAMTS5,ALOX12,ANGPTL4,ATP1A2,BGN,BIRC5,BMP6,Ccl2,Ccl7,CDKN1A,CHRM3,COL1A1,COL1A2,COL4A6,CXCL6,FMOD,FN1,FST,GATM,GJA1,HPGD,HSD11B1,IL6,KDR,KRT18,MAN2B2,MMP2,NRP1,PAX9,PDPN,PTCH1,PTGIS,PTGS2,PTH1R,PTHLH,PTPN20,RBMS3,SKIL,SMAD1,SMAD3,SMAD7,SNAI1,SPP1,THBS1,TIMP1,VEGFA	678 (16)
methylprednisolone		chemical drug		0.065	8.59e-11	ABAT,ABCC9,AK4,ALDH1A1,ANXA1,ARL4A,ASNS,ASS1,ATP1A1,ATP2A2,ATRN,B4GALT6,BAIAP2,Calm1 (includes others),Ccl2,CD74,CD9,CDH13,CDKN1A,CXCL3,Cyb5r3,CYCS,DAB2,DYNLL1,ECE1,EDNRB,EFNA1,ENPP2,EPHX2,FABP5,FAH,FBLN5,FGL2,FN1,FSTL1,G0S2,GADD45A,GATM,GCHFR,GNL3,GPR182,HNMT,HSD3B7,IL6,INSIG1,ITGA2,ITGA7,ITGB5,KLF15,KLK11,LAMB2,LOX,LPL,Ly6a (includes others),LYVE1,ME1,MGMT,Mt1,MYC,MYO1B,NME1,NR1H3,NUDT4,PAQR7,P…	708 (17)
raloxifene		chemical drug	Activated	2.695	8.6e-11	BCL2,BIK,BMP2,CCL5,CCNB1,CDKN1A,CXCL6,CYP1B1,DYNLL1,ENPP2,EPHA1,EPOR,ERBB2,GNS,IFI30,IL6,ITGB3,LAMB1,LAMB2,MATN2,MIF,MKI67,MMP2,MYO1B,NCOA1,PCNA,PDGFRA,PGR,PLK2,PPP1R3C,PRSS23,PTGS2,SELENBP1,SLIT2,SMAD3,SMAD7,SNCG,SPP1,STC1,TGFA,TIMP1,TOP2A,TTC9	767 (20)
SRF	-0.445	transcription regulator		-1.55	8.75e-11	Abca8a,ACTA2,ACTC1,ACTG2,AKAP12,ANKRD6,APOLD1,BATF,BCL2,BICC1,BMP2,CCL5,CDKN1A,CLDN15,CLDN5,CNN1,DES,DUSP5,ETS1,ETV1,EYA2,FHL1,FLNA,FLT1,FLT4,FOSL1,FOXQ1,FST,G0S2,GADD45A,GADD45G,GATA4,GP1BA,GPATCH4,GPM6A,HSPG2,ITGA6,ITGA9,KDR,LCN2,LDB3,LEPR,LMOD1,LPL,LRP1,LRP4,MBD2,MYH11,MYO1B,MYOCD,MYOM1,Nebl,NFATC2,NR4A2,ODF2L,Pcp4l1,PDE2A,PGLYRP1,PLA2R1,PRG2,PRSS57,PTGS2,RAI2,SEMA3A,SLC6A4,TMEM40,TNC,VCAN	401 (14)
CREBBP	-0.101	transcription regulator		1.118	9.16e-11	ADAM12,ADORA2A,AKAP12,ARHGEF10L,ARID5A,BCL2,BIRC5,CAMK4,CAPG,CCL5,CDH5,CDKN1A,COL1A2,CORO2B,CRIM1,CRISPLD2,DHFR,DTX1,EPN1,EYA2,FABP4,FGFR3,FMNL2,FNBP1,FNDC3B,GNG2,HDAC11,HMGCS2,HSD11B1,HVCN1,IGF1R,IL10RA,IL6,ITGA6,ITGA9,KLF2,KLHL4,KLK3,LPL,MAF,MAP3K8,MBTPS1,MFHAS1,MGMT,MYC,Nebl,NR4A2,NTRK3,PCNA,PDE10A,PDE3B,PDGFRB,PDLIM4,PGR,PLEKHF1,PTGS2,RAPGEF4,RARB,RGS2,RSAD2,RTP4,SERPINA3,SH3GL3,SLC18A2,SLC43…	632 (23)
EPAS1	-0.952	transcription regulator		0.185	9.45e-11	ABCG2,ADM,AKAP12,ANGPT2,ANGPTL4,AXL,BCL2,CA9,Calm1 (includes others),CDKN1A,DTX1,EGFR,EGLN3,FABP4,FASN,FBLN2,FHL1,FLT1,FN1,FXN,GCHFR,GJA1,IGFBP3,IGFBP5,IL6,IRS2,ITGB3,ITIH5,KDR,LOX,LPL,MIF,MYO7A,NFIL3,NRARP,NRN1,PELP1,PFKFB3,PGF,PLOD2,PPARG,PTPRZ1,RET,SLC2A4,SPHK1,STC2,TEK,TGFA,VEGFA,ZNF423	691 (27)
VEGFA	-1.069	growth factor		1.164	1.31e-10	ACE,ACTA2,AK4,ANGPT2,BATF,BCL2,BIRC5,BMP2,Ccl2,CD68,CDH5,CDKN1A,COL1A1,CSTB,CXCL6,DUSP5,EFNB2,ETS1,FABP4,FGFR1,FLT1,FLT4,FN1,GJA1,HBEGF,IGFBP5,IL6,ITGA2,ITGB3,KDR,LMNA,ME2,MEOX2,MKI67,MMP2,NFATC2,NME1,NOTCH4,NR2F2,NR4A2,NRP1,PCNA,PDCD1,PDGFRB,PIM1,PLAT,PTGS2,RASGRP3,RCAN1,RGS5,SNCG,ST5,STC1,SYNM,TEK,TFPI2,THBS1,TIMP1,TNC,UNC5B,VEGFA	635 (19)
P38 MAPK		group		0.408	1.33e-10	ANK1,ASS1,BCL2,BGN,BIRC5,BMP2,Ccl2,CCL5,CD1D,CD36,CDH5,CDKN1A,CLDN5,COL3A1,CXCL3,CXCL6,CYP1A1,DES,DIO2,DUOX2,EDNRB,ETS1,FABP4,FLNA,FN1,FST,GJA1,GOLGA2,HTRA1,IGFBP5,IL6,INHBA,ITGB3,KCNB1,KDELR3,KLF15,LDB3,MIF,MMP2,MYC,MYH11,NFATC2,NFATC4,NGF,NPR1,PCNA,PLA2G7,PLAUR,POSTN,PPARG,PTGS2,RAD51,RCAN1,RGS4,RHOB,SDC2,SMAD3,SNAI1,STIM1,TGFA,THBS1,TIMP1,TIMP2,TOP2A,TRIB1,TRPC3,TSLP,TWIST1,ULK1,VEGFA,VEGFC	750 (20)
RETNLB		other		0.295	1.71e-10	ACTA2,BMP1,Ccl2,CCL5,COL1A1,COL1A2,ELN,FABP4,FGFR1,FN1,FRZB,FZD1,HEY1,IL13RA1,IL6,IRS1,IRS2,KLF15,MMP2,MYC,Retnla,SFRP1,SMAD1,THBS4,TIMP1,UBE2C,UBE2T	696 (20)
tamoxifen		chemical drug		0.529	1.71e-10	ABCG2,ADM,AGR2,AQP1,ASS1,BCL2,BID,BIRC5,BMP2,BRCA1,CD36,CDKN1A,CYCS,DLK1,EGFR,EIF4EBP1,ERBB2,FABP4,FADS1,FADS2,FASN,G0S2,GAP43,IGF2,IGFBP3,IL6,INPPL1,IRS1,KLK3,LTBP2,MIF,MKI67,MYC,NFATC4,NNMT,NRCAM,OXTR,PCNA,PGR,PPARG,PRSS23,PTGS2,PTPRS,RAMP3,SCD,SDC3,SERPINA3,SLC7A2,SMAD3,SMAD7,SNAI1,SOST,SPP1,SYNE1,TGFA,UCP2,VEGFA,ZEB2	763 (24)
ADCYAP1		other		-0.465	1.91e-10	ACTN1,ARHGEF25,ATRN,BCL2,BMP6,CACNA2D3,CAMK4,Ccl2,CCL5,COL3A1,COL5A1,CXCL3,DCDC2,ENPP2,FGFR2,Fndc1,FRRS1,FST,GAP43,GAS1,GREM2,HAPLN1,IL6,KIF23,LMO1,MCAM,MEST,MME,MYC,NFATC2,NPY1R,NQO1,Nrxn3,NTRK2,PDE10A,POR,POSTN,Psg18 (includes others),RHOB,S100A10,SERPINA3,SERPINB1,SH2B2,SLC18A2,SMAD1,TCF4,TGFBI,TK1,TMPO,TSC22D1,TTYH1,UCP2	624 (18)
L-triiodothyronine		chemical - endogenous mammalian		-1.148	2e-10	ACOT2,ACTC1,ACTG2,ADAMTS5,ADM,ADRB2,ALDH1A1,ATP1A1,ATP2A2,CAMK4,Cbr2,CD36,CDKN1A,CMKLR1,COL4A1,Cox6c,DIO2,DLK1,DUPD1,DUSP5,ECE1,EFNA1,ENPP2,EPAS1,FABP4,FASN,FGFR1,H6PD,HBA1/HBA2,HCN2,HR,HSD11B1,IGF1R,IGFBP3,IGFBP6,IL6,ITGA7,ITGB3,ITIH3,LMNA,LRP1,ME1,MYC,NME1,NR1H3,Nrgn,NTNG1,PER1,PGR,POR,PPARG,PRKCQ,PRKCZ,PTGS2,PTH1R,RCAN2,RELN,RET,RGS2,SCD,SFRP2,SH2B2,SLC12A5,SLC2A4,SLC43A2,SMAD7,TBC1D30,THRA,TH…	455 (18)
STAT3	-0.266	transcription regulator		1.794	2.77e-10	ACTA2,ADM,ALDH1A1,ANGPT2,ANGPTL4,BATF,BCL2,BIRC5,BOC,CA9,Ccl2,CCL5,CCNB1,CD74,CD9,CDH5,CDK1,CDKN1A,CFB,COL1A1,COL1A2,COL3A1,COL5A1,CXCL3,CXCL6,ECT2,ENPP2,EPAS1,FASN,FGL2,FLRT3,FLT1,FN1,FSCN1,FST,GADD45A,GADD45G,GAP43,GIGYF1,GJA1,HEY1,HOXA10,IFI16,IFI30,IFITM3,IGF1R,IGFBP5,IL6,IL7,IRF5,KDR,KLK3,LBP,LEPR,LOX,MAF,MMP2,MRAS,Mt1,MYC,NEURL3,NFATC2,NR4A2,NRP1,NRP2,PDCD1,PGR,PIM1,PLAUR,PTGS2,PTN,RET,ROR1…	694 (18)
EOMES		transcription regulator	Inhibited	-2.138	3.21e-10	ACTA2,ACTC1,ADM,ALCAM,ANXA1,CAP2,COL3A1,COL6A3,DIPK2A,EGFLAM,FOXC1,FRZB,FZD8,HOXA10,IGFBP3,ITGA2,KDR,MEOX1,MICAL2,NAV2,NRP2,PCDH19,PDGFRA,PDPN,PLXNA4,PREX1,RGS2,ROBO2,TCF4,TFPI2,TGFBI,ZNF521
ERBB4		kinase		1.876	3.89e-10	ACTA2,BRCA1,CADM1,CDKN1A,COL3A1,EFNB2,EGFR,FBLN2,GADD45A,GAP43,GJA1,HBA1/HBA2,Hbb-b1,Hbb-b2,HBEGF,IGF2,IGFBP5,MYC,PGR,PTGIS,PTGS2,SERPINA3,SFRP1,SPARCL1,THBS1,Tmsb4x (includes others),TNC,WNT2	694 (22)
CCR2		G-protein coupled receptor	Inhibited	-2.036	4.16e-10	BGN,Ccl2,CCL5,Ccl6,Ccl7,COL1A1,COL1A2,COL4A1,COL6A1,COL6A2,COL6A3,CXCL3,CXCL6,DPT,FBLN1,FBLN2,FN1,HSPG2,HTR2B,IL6,LAMB2,MMP2,OGN,PCOLCE,PRELP,TGFBI,THBS1,TIMP1,TIMP2,TNC,TSLP,VCAN	742 (19)
prostaglandin E2		chemical - endogenous mammalian		0.245	4.3e-10	ACTA2,ANGPT2,ANGPTL4,BCL2,BIRC5,BMP2,BRCA1,Ccl2,CCL5,CCNB1,CDKN1A,COL1A1,CXCL3,DYNLL1,EGFR,ENPP3,ERBB2,EREG,ETS1,FASN,FLT1,FMOD,FN1,FOSL1,FST,FSTL3,GJA1,HDC,IGF1R,IGFBP5,IGFBP7,IL2RG,IL6,JAG2,LMNA,MBTPS1,MMP2,MRC1,MYC,NFIL3,NR1H3,NR4A2,NRP1,PGF,PGR,PKN1,PLK2,PPARG,PTGER4,PTGS2,Retnla,RGS2,SPHK1,SPP1,TCF4,TGFA,THBS1,THRSP,TWIST1,UCP2,VEGFA,VEGFC	712 (18)
E. coli serotype 0127B8 lipopolysaccharide		chemical - endogenous non-mammalian		1.104	4.38e-10	ADRA2A,ANXA1,AQP1,Ccl2,CCL5,Ccl7,CELSR2,CHST8,DIO2,EDNRB,ELN,FAM107A,FZD1,FZD2,GJA1,GJA5,GNA14,GNG2,GPRC5B,IL6,IL7,IRF5,ITPK1,KLF2,LAMB2,LAMC2,LCN2,LGALS3,LOX,MAP3K8,NGF,NTRK2,P2RY6,PANX1,PTGS2,RSAD2,S1PR3,SLC16A9,SLC4A2,SMAD3,SOD3,SYNM,VEGFA,VIPR1	578 (15)
IKBKB	0.014	kinase		1.769	4.7e-10	AURKB,BCL2,BMP2,BRCA1,Ccl2,CCL5,CDH13,CDKN1A,CH25H,CTSF,CXCL3,CXCL6,CYP1B1,CYP7B1,ECT2,ENPP2,EREG,ETS1,FASN,FOXF2,FSCN1,GADD45A,IFI16,IGFBP6,IGFBP7,IL6,ITGB3,ITGB5,KIF23,KRT18,LCN2,MMP2,Mt1,Mt2,MYC,MYO1D,NGF,OGN,PLK1,POSTN,PTGS2,RCAN1,RGS16,S100A4,SEMA3C,SFRP1,Slfn2,SMAD7,SNAI1,SOD3,TIMP2,Tmsb4x (includes others),TNC,TRPC1,TSLP,TWIST1,VCAN,VEGFA	726 (17)
Hdac		group		-0.272	5.15e-10	BCL2,BIRC5,BMP2,CDKN1A,DKK3,EDNRB,EGFR,ERBB2,EYA1,FOSL1,HPGD,HTRA1,IGFBP3,IL6,ITGA8,KCNH2,LRP4,MEOX1,MEOX2,MYC,NDRG4,NOTCH4,NPNT,NRP1,PGF,PREX1,RARB,RGS10,ROBO2,SEMA3C,SFRP1,SFRP2,SMO,SMPD3,SPP1,SPRY1,TBX3,THBS4,WIF1,WNT9B,ZEB2	651 (23)
GNAQ	-0.787	enzyme		1.4	5.4e-10	ABCB1,ADM,AK4,ATP2A2,BMP2,Ccl2,CNN1,CSPG4,CXCL3,DUSP5,FST,GADD45A,GNAQ,GRB14,IL6,INSIG1,MAP3K8,MAPK11,MEOX2,MMP16,MYC,NFIL3,NR4A2,OLR1,PDE10A,PGR,PLAT,PLAUR,PTGS2,RELN,RHOB,SELENBP1,SPHK1,VEGFA	624 (23)
GNA14	-1.13	enzyme			5.48e-10	ABCB1,ADM,AKAP12,BMP2,CNN1,CSPG4,CXCL3,DUSP5,FST,GADD45A,GRB14,HBEGF,IL6,MAP3K8,MEOX2,NFIL3,NR4A2,OLR1,PLAT,PLAUR,PTGS2,SELENBP1,SPHK1,VEGFA,XDH	388 (13)
YY1	-0.091	transcription regulator		-0.632	5.67e-10	ACTA2,ACTC1,ALCAM,AURKA,AURKB,BIK,BIRC5,BMP6,BRCA1,CAPG,CCNB1,CCNB2,CDCA3,CDKN1A,CENPA,CENPE,CHRDL1,COL1A1,DKK2,DMPK,EFNA3,EGFR,ERBB2,GADD45G,HELLS,Hmgb3,IGFBP5,KCNB1,KDR,KIF23,KIF2C,KLF2,MKI67,MKRN3,MMP2,MYC,MYH11,MYOM1,NSG1,PCNA,PDGFRA,PERP,PLK1,PPP4R2,PRC1,PROX1,RAD18,RAD51,RAD51AP1,TACC3,TCF4,TGFBI,TOP2A,TSLP,VEGFA,VEGFC,VPREB1	650 (23)
PTK2	-0.42	kinase		-0.871	5.73e-10	ACTA2,Ccl2,CDKN1A,COL1A1,COL1A2,CSPG4,DSP,FN1,GATA4,IL6,IRS1,KRT18,MMP2,PCOLCE2,PDGFRB,SERPINB1,SNAI1,SPP1,THBS1,TIMP1,TLL1,TNC	661 (20)
Lh		complex		0.349	6.58e-10	ACPP,ACTA2,ACTG2,ACTN1,ADCY7,AKAP12,ALPL,ATP2A2,ATP2B1,ATP9A,AXL,CAP2,CDK16,CYFIP2,DAB2,EGFR,EREG,FST,GJA1,GPRC5B,HSD11B1,IL6,ITGB5,KRT18,MBD2,MMP2,PDXK,PER1,PGR,PLAT,PLCL1,PRKACA,PRKAR2A,PTGS2,PTPN21,PTPRE,RGS16,RGS4,RGS5,RGS7,RHOB,SFRP4,SLIT2,TFPI2,THBS1,THBS2,TK1,TMBIM6,TP53I11,TRIB1,UPP1,VEGFA,VEGFC	721 (22)
OGA	-0.316	enzyme		0.68	9.55e-10	ABCC9,ABLIM1,ABLIM3,ADAMTS5,ARHGEF25,ASS1,AVEN,BCL2,C1RL,CACNA2D3,Ccl2,Ccl6,CD36,Cd59a,CD68,CDCA7,CDKN1A,CELSR1,CH25H,CMTM8,CNN1,CSF2RB,CXCL6,CYFIP2,DAB2,DCLK1,EFNB2,EPHB3,EPHB6,EPS8,FBLN1,FGF13,FGFR1,FGFR4,FLNA,FN1,FSCN1,GAA,GADD45A,GADD45G,GALNT6,GAS1,GRIN3A,HMGCLL1,HPGD,HSD3B7,IGF2,IGFBP3,IGFBP5,IGFBP7,IL17RD,IP6K3,ITGA2,ITGB5,JDP2,LAMB1,LRP4,MCAM,MICALL2,NDUFC2,PLCE1,PRKAR1B,RHOB,S100A6,SLFN1…	760 (26)
cardiotoxin		chemical - other		1.914	1.03e-09	AOC3,APRT,BGN,BIK,BIRC5,Ccl2,CCL5,Ccl6,Ccl7,COL1A2,COL6A2,CSF2RB,DOK2,EDNRB,FGFR1,IGF2,IGFBP7,IL10RA,IL13RA1,IL2RG,ITGA6,ITGB5,KPNA2,LTBP1,MEST,MMP2,MRC1,PCNA,PEG3,PTN,RANBP1,SFRP2,SNRPD1,SPP1,TIMP1,TSC22D1,TSHZ3,UCP2
MYOD1		transcription regulator		0.438	1.07e-09	ACTA2,ACTC1,ADCY7,ASB2,ASS1,BCL2,BRCA1,CDKN1A,COL4A1,DAG1,DES,DHFR,ENPP2,FOSL1,FSTL1,GADD45A,GADD45G,GMFG,GREM2,HDAC11,HIPK3,HSPA4L,IFI16,IGF2,IGFBP5,ITGA7,LDB3,MKI67,MMP2,NPTX1,PLEKHO1,POSTN,PRKACA,PRKAR2B,RAPSN,RBM38,RECK,RPS6KA2,SDC2,SGCA,SLC12A2,SLC2A4,SMAD7,TNS1	650 (19)
BMP7		growth factor		-0.874	1.08e-09	ACTA2,BIRC5,BMPR1A,CDKN1A,COL1A1,COL1A2,CYCS,DLK1,FASN,FN1,FOXC2,GJA1,GRB14,IGF1R,IGF2,IGFBP3,IGFBP5,IGFBP6,IL6,IRS1,Meis1,MMP2,NCAM1,NOG,PCSK6,PPARG,S100A4,SLC2A4,SMAD1,SMAD6,SMAD7,SOST,SPP1,VEGFA	653 (21)
deferoxamine		chemical drug		1.138	1.1e-09	ADM,ANGPT2,ANGPT4,ANGPTL4,BCL2,CA9,CCNB1,CDKN1A,DUSP5,EGFR,EGLN3,ELN,EPAS1,FASN,FLT1,GADD45A,GAS7,HTR2B,IFI16,IGFBP3,IGFBP5,IL6,JAG2,LCN2,LPL,LY75,ME1,MMP2,MYC,NFATC2,NFATC4,NFIL3,NR4A2,PFKFB3,PLAT,PLAUR,PPARG,RSAD2,SHMT1,SMAD7,SPP1,SULF2,TEC,TSC22D1,VEGFA	709 (18)
CHUK	0.061	kinase	Activated	2.274	1.14e-09	BMP2,Ccl2,CCL21,CCL5,CCNB1,CDH13,CDKN1A,CH25H,CTSF,CXCL3,CXCL6,CYP7B1,ENAH,ENPP2,EREG,FOXC2,FOXF2,HEY1,HEY2,IFI16,IGFBP6,IL6,ITGB3,KCNH2,LCN2,MMP2,Mt1,Mt2,MYC,NGF,OGN,PCNA,PLK1,PTGS2,RCAN1,RGS16,SEMA3C,SFRP1,Slfn2,SMOC2,SOD3,SPP1,TGFA,TK1,TWIST1,VEGFA,VEGFC	668 (14)
SOX2		transcription regulator		0.304	1.16e-09	ABCG2,ABTB2,ADAMTS4,ALDH1A1,APH1B,ARHGEF10,AXIN1,BCL9L,BIRC5,BMPR1A,CD9,CDKN1A,CHRD,COL1A1,CTNNAL1,DKK3,DSP,DUSP5,EFEMP1,EFS,EGFR,FAM107B,FGFR4,FLT1,FRZB,FST,GAB2,GATA4,GATA6,GBX2,GJA1,GJC2,HEY1,HOPX,IER5L,INHBA,INPPL1,IRS1,KDR,KIF26A,KRT18,LPAR1,LRP4,MARCH8,Meis1,MPZL1,NIPAL4,NKX2-3,NKX6-2,NOG,NOTCH4,NRARP,NRP1,PARD6G,PDGFRA,PEG3,PLD1,PPARG,PRKCQ,PSAT1,SEMA3D,SEMA5A,SERPINA1,SLC12A2,SLC44A1,SMAD…	620 (22)
F2R	-0.604	G-protein coupled receptor		1.629	1.41e-09	ANGPT2,Ccl2,COL13A1,CXCL3,DSP,ECE1,FGFR2,FLT1,FN1,GJA1,IGFBP7,IL6,ITGA6,KDR,LAMB1,MCAM,MIF,MMP2,MYOCD,PGR,PLAT,PLAUR,PTGS2,S100A4,TEK,TFPI2,THBS1,TRPC3,VEGFA,VEGFC	491 (18)
MAP2K1	-0.022	kinase		0.143	1.47e-09	ABCB1,ACTA2,BCL2,BRCA1,CCL5,CDH5,CDKN1A,COL1A1,COL1A2,COL3A1,CXCL3,DAB2,DUSP5,FASN,FLNA,FOSL1,FURIN,GPRC5B,HDC,IGF1R,IL6,IRS1,ITGB3,LGALS3,MMP2,MYC,PCNA,PDGFRA,PIM1,PLAUR,PTGS2,RAB38,Retnla,SERPINA1,SIRPA,SMAD3,TFPI2,THBS1,TNC,TNFRSF11A,TWIST1,UNC5B,VEGFA	643 (19)
aldosterone		chemical - endogenous mammalian		0.137	1.5e-09	ACE,ADM,ATP1A1,BMP2,Ccl2,COL1A1,COL1A2,COL3A1,EGFR,ELN,FABP4,FKBP1B,FLT1,FN1,IGF1R,IL6,IRS1,IRS2,KCNMA1,KCNMB1,KDR,LOX,LPL,MMP2,NFATC2,OLR1,PER1,PGF,PLAUR,PPARG,PTGS2,RGS2,RPTOR,SLC12A2,SPP1,WNK4	687 (22)
TNFSF11		cytokine	Activated	3.969	1.53e-09	ATP6V0D2,AURKA,BCL2,BST1,Ccl2,CCL5,Ccl7,CDKN1A,CLEC11A,CXCL3,CYP1A1,DAB2,DMPK,DOK2,ECT2,ETS1,FOSL1,FRRS1,GPR68,IL13RA1,IL6,IRF8,ITGB3,JDP2,LDB2,MARCKSL1,MYC,NEK2,NFATC2,NFIL3,NR1H3,PIM1,PLAUR,PLD1,PLK1,POR,PTGER4,PTGS2,PTPRE,RACGAP1,RCAN1,RGS16,RHOB,Slfn2,SPP1,SRXN1,STMN1,TNFRSF11A,Tnfsf9,TRAF1,TRAIP,TSPAN13,TTK,USP18	675 (21)
cholesterol		chemical - endogenous mammalian		1.399	1.55e-09	ABCA2,ACTA2,ADAM11,C15orf48,Ccl2,Ccl7,CD68,CNN1,COL1A1,COL3A1,CXCL3,CYP7B1,DBI,DES,FABP5,FADS1,FASN,FLT1,FN1,GNAI1,GP1BA,HBEGF,IL10RA,IL6,INHBA,INSIG1,LAPTM5,LEPR,LGALS3,LPL,ME1,Meis1,MME,MMP2,MYH11,NCF2,NR1H3,NR4A2,PSAT1,PTCH1,PTGS2,RGS16,SCD,SLC2A4,SMO,SQLE,STX3,THBS1,TIMP1	750 (21)
EDN1	-0.039	cytokine		0.456	1.55e-09	ACTA2,ADAM12,ANXA1,ATP2A2,BCL2,CDK1,COL1A2,COL4A1,COL5A1,COMP,EDNRB,EGFR,ENAH,EREG,FLT4,FN1,FOSL1,FST,GATA4,GJA1,HBEGF,HCN2,HEY1,IL6,INHBA,INSR,ITGA2,ITGB3,LEPR,MARCKSL1,MCAM,MMP2,MYC,OLR1,PLAUR,PTGER4,PTGS2,RAMP3,SOX5,THBS1,TIMP1,TNC,VCAN,VEGFA,VEGFC	649 (20)
APP	-0.091	other	Activated	2.426	1.57e-09	ABCG2,ABL1,ACTA2,ADAMTS4,APH1B,ATP1A2,AXIN1,AXL,BCL2,BIK,BMP6,C1R,Ccl2,CCL5,Ccl7,CD68,CD74,CDH5,CDK1,CH25H,CLDN5,COL13A1,Cox6c,CSF2RB,Ctla2a/Ctla2b,CXCL3,CXCL6,CYCS,CYFIP2,CYP26B1,DBI,DPYSL2,DYRK1B,ECE2,EGFR,ELN,ENPP2,EPAS1,ERBB2,F2RL3,FGFR1,FLNA,FN1,FZD1,FZD7,GAP43,GNG2,GPM6B,Gsta4,HBA1/HBA2,Hbb-b1,Hbb-b2,HEY1,HEY2,HIST1H2BD,HMGA1,HSPG2,IFI16,IGF1R,IGF2,IGF2BP2,IGFBP5,IL6,IL7,INHBA,INSR,IRF5,IRS…	702 (20)
AG490		chemical - kinase inhibitor	Inhibited	-2.509	1.64e-09	ACE,ACTA2,BCL2,BIRC5,Ccl2,CCL5,CD68,CDKN1A,DUOX2,ENPP2,HPGD,IGF2,IL6,IL7,LY96,LYN,MYC,MYH10,MYH11,PCNA,PDCD1,PIM1,PTGS2,S100A10,SPP1,TIMP1,TWIST1,VEGFA	715 (17)
Histone h3		group			1.78e-09	ABCB1,ADCY5,AKAP12,ANK1,ARHGEF17,BCL2,BIRC5,CA9,Ccl2,CCL5,CCNB1,CD1D,CD9,CDKN1A,CKAP4,COL1A2,COL4A6,CSPG4,DBF4,DUSP2,EFNA1,EPHB3,FABP4,FASN,FGFR1,FGFR2,FLT1,GATA4,GATA6,GBX2,GRIK5,HOXA10,HOXB6,HPSE,Ifi27l2a/Ifi27l2b,IFITM3,IGF1R,IGFBP3,IL6,KDR,KLF2,KLK3,Meis1,MGMT,Mt1,NDUFC2,NOG,NRARP,OSGIN1,PCNA,PGR,PNO1,PPARG,PRRT4,PTCH1,PTGS2,RAB38,RARB,RCAN1,RELN,RGS10,RGS4,RPL12,RSAD2,SBF1,SCD,SFRP1,SLC12A5,…	618 (18)
SB203580		chemical - kinase inhibitor		-1.414	1.78e-09	4930486L24Rik,ACOT2,ACTA2,ADAMTS4,ADAMTS9,ADRB2,ALPL,ANXA1,AQP1,BCL2,BIRC5,BMP2,Ccl2,CCL5,Ccl7,CCNB1,CDK1,CDKN1A,CLDN5,COL1A1,COL1A2,COL3A1,CXCL3,CYP1A1,CYP1B1,CYP26B1,DUOX2,EDNRB,EFEMP1,EFNA1,EMP2,EREG,F2RL3,FLT1,FN1,FOXQ1,GADD45A,GJA1,Gsta4,HAPLN1,HAS3,IGFBP3,IL6,ITGB3,KDR,MMP2,MYC,MYH11,NKX3-1,NPR1,NQO1,OLR1,PDGFRA,PDGFRB,PLAT,PLAUR,POSTN,PPARG,PTGS2,PTHLH,RBMS2,RGS7,S100A10,SMAD3,SNAI1,SOD3,S…	572 (17)
TP63		transcription regulator		0.852	1.99e-09	ABCB1,ADA,ADM,AEN,AGR2,ALOX12,AXL,BRCA1,CCNB1,CDK1,CDKN1A,CKS2,COL4A1,COL4A3,COL5A1,CXCL17,EGFR,FASN,FGFR2,FGFR3,FN1,FOSL1,FST,GADD45A,HAS3,HBEGF,IGFBP3,IGFBP6,IGFBP7,IL6,INHBA,INSR,IRF5,ITGA2,ITGA7,JAG2,KHSRP,KIF23,KLK3,LYN,MRPL41,MYC,PAX9,PCNA,PELP1,PERP,PKP2,POSTN,PRKCZ,PTHLH,RACGAP1,RAD51,S100A4,SMAD3,SMURF2,SNAI1,SSPN,STK11,THBS1,THY1,TMBIM6,TNC,TRAF1,TWIST1,UBE2H,ULK1,ULK2,VEGFA,VIL1,ZEB2	646 (20)
estrogen		chemical drug		1.583	2.25e-09	AURKA,AXL,BCL2,BMP2,BRCA1,CCNB2,CDKN1A,COL1A1,COL3A1,COL5A1,COL6A2,DHFR,EGFR,EPAS1,ERBB2,FBLN1,FLT1,FN1,GAP43,GJA1,HBEGF,IGF1R,IGF2,IGFBP5,IGFBP6,IL6,IRS1,KDR,LCN2,LPL,MEOX2,MYC,NFIL3,NME1,NRIP1,NTS,OXTR,PCNA,PGR,PIM1,PLAT,PLIN4,PTGS2,RET,RRM2,SERPINA3,SLC6A4,SMAD3,SMC2,SPP1,Sprr2a1/Sprr2a2,TAC3,TGFA,Tmsb4x (includes others),TOP2A,TYMS,VEGFA	718 (19)
OSM		cytokine		1.205	2.52e-09	ACE,ACOT2,ACTA2,ADAMTS4,ADAMTS5,ANGPT2,ANXA1,ARL4A,ASNS,ATP9A,BAIAP2,BCL2,BST1,C1R,Ccl2,CCL5,CDA,CDKN1A,CH25H,COL1A1,COL1A2,COL3A1,COL6A1,CXCL3,CYP1B1,DENND5A,EIF4EBP1,EPHA1,EPHB6,FASN,FLNA,FN1,FOSL1,FOXC1,GADD45G,GAP43,GAS7,GNS,GOLGA2,HBEGF,HIPK3,HSD11B1,IGFBP3,IGFBP6,IL13RA1,IL33,IL6,IL7,IRS1,ITGA6,ITGA7,ITGB5,LBP,LCN2,LMNA,LMO1,LRG1,MGMT,MKNK2,MMP2,MRC1,Mt2,MYC,MYH10,NMB,NOMO1 (includes others…	796 (21)
halofuginone		chemical drug		-0.105	3.03e-09	AKAP12,B4GALT6,BGN,COL1A1,COL1A2,CTHRC1,DKK3,EDNRB,ELN,FBLN5,FGFR3,FSTL1,FXYD6,GATM,GNG11,IGFBP3,ITGA7,LOX,LTBP1,MMP2,PCOLCE,PCSK6,PDGFRA,PIK3R2,POR,PRELP,PTPRS,SMAD7,SPARCL1,SPP1,ST3GAL2,STEAP3,TCF4,TIMP1,TIMP2	667 (19)
N-acetyl-L-cysteine		chemical drug		-1.549	3.41e-09	ABCB1,ACTA2,ADM,AQP1,ATP1A1,BCL2,BMP2,Ccl2,CCL5,CD36,CDKN1A,COL1A1,CXCL3,EIF2AK3,FASN,GJA1,GNL3,HBEGF,HDC,IGF1R,IL6,LPL,LY96,MMP2,MRC1,MYC,MYH11,MYOCD,NCF2,NQO1,OSGIN1,PCNA,PGR,PLAUR,PSEN2,PTGS2,RARB,RHOB,SLC16A1,SLC2A4,SNAI1,SPP1,TBXA2R,TNC,TWIST1,VEGFA,VEGFC,XAF1	667 (21)
fulvestrant		chemical drug		0.391	3.54e-09	ABL1,ADRB2,ASNS,AURKA,AXL,BCL2,BIK,BIRC5,BMP2,Ccl2,CCL5,CCNB1,CD74,CDC20,CDK1,CDKN1A,CENPF,CYCS,DYNLL1,EGFR,EPHA1,EPOR,FLT1,GAB2,GADD45A,GJA1,GTSE1,IGF1R,IGFBP5,IRS1,ITGB3,KLK3,LEPR,LPL,MYC,MYO1B,NME1,NRP1,PCNA,PGR,PLK2,POLA2,PPARG,PRSS23,PTGS2,SNCG,STC1,STMN1,TGFA,TK1,TTC9,UBE2C,VEGFA,VIPR1	763 (24)
AGN194204		chemical drug		0.95	3.6e-09	ATP1A1,AURKA,CCNB1,CD5,CDK1,CDKN1A,COTL1,CYP7B1,DENND5A,FNBP1,FURIN,GADD45A,GJA1,GNAI1,Hmgb3,IFITM3,IRS2,KIF2C,KIF4A,LDB3,LMNA,LPL,LRMP,MKI67,MYC,NRIP1,PIM1,PLAC8,PLK1,PRC1,RAMP3,RGS10,SCD,SMC2,SMC4,SPP1,STIM1,TIMP1,TOP2A	669 (23)
GW3965		chemical reagent	Inhibited	-2.255	3.65e-09	ADCY3,ADRA2A,APOD,Ccl2,CCL5,Ccl7,CCNB1,CENPF,FABP5,FADS2,FASN,GADD45G,GATM,GNAI1,GNG11,GNG2,GNGT2,IL6,KIF23,LPL,NR1H3,PRKAR2B,PTGS2,RAD51,SCD,SLC2A4,THRSP,TOP2A,TRIB1,VEGFA,VIPR1,WFIKKN1	738 (21)
FOXO1	0.064	transcription regulator	Activated	3.234	4.25e-09	AFF3,ANGPT2,ANGPTL4,ASPM,ATP6V0A1,ATP6V0D2,BCL2,BID,BIRC5,CAMK4,CCNB1,CCNB2,CD36,CDH5,CDK1,CDKN1A,CENPF,CH25H,CLDN5,CMC4,COL4A1,CYCS,DEPDC1,DIO2,DLGAP5,EBF1,EDNRB,EIF4EBP1,ELOVL6,FABP4,FABP5,FASN,FLT4,FMOD,FN1,FOXC1,GADD45A,GPAM,HYOU1,IGF1R,IGFBP7,IL17RA,IL6,INSR,IRF5,IRS1,IRS2,KIF18A,KLF2,KLK3,LPL,ME1,MRPS18A,MYC,NCAPG,NDUFA8,NEK2,NKX3-1,NRP2,NUSAP1,PBK,PDCD1,PPARG,PRC1,PTPRB,Ptprv,S1PR3,SCD,SLC…	612 (20)
BRD4		kinase		-0.279	4.32e-09	ABLIM1,ACTA2,ANKRD37,AURKB,BCL2,COL1A1,COL1A2,COL4A1,COL5A1,DCTPP1,FADS1,FN1,HS1BP3,IRF8,ITGB5,LCK,LOX,LOXL1,MYC,NME1,NQO1,PDGFC,PDGFRB,PIM1,PLAT,SLC16A9,SLC19A1,SLC7A2,SORD,STC2,THBS1,THBS2,TIMP1	539 (12)
ramipril		chemical drug		1.846	4.35e-09	COL1A1,COL1A2,COL3A1,COL4A1,COL4A5,DDR1,FN1,IL6,ITGA2,LAMB1,MMP2,PTGS2,TIMP1,TIMP2,VEGFA	315 (7)
Mek		group	Activated	2.426	4.61e-09	ABCG2,AXL,B4GALT6,BID,BIRC5,Ccl2,CD36,CDCA7,CDKN1A,COL1A2,DDR1,DUSP5,EPAS1,ERBB2,EREG,ETS1,ETV1,FASN,FGFR1,FOSL1,GAP43,GNL3,IL6,ITGA6,ITGB3,KDR,MAF,MMP2,MST1R,MYC,NGF,NOX4,NQO1,NR1H3,PDGFRA,PDGFRB,PTGS2,SEMA3C,SNCG,SORL1,SPRED2,SPRY1,STON1,THBS1,TOP2A,TWIST1,VEGFC,XAF1	684 (21)
CSF2		cytokine	Activated	5.652	4.67e-09	ACE,ADA,ANXA1,AURKA,BCL2,BID,BIRC5,BUB1,Ccl2,CCNB1,CD5,CD74,CDC20,CDCA2,CDCA3,CDCA5,CDCA8,CDK1,CDKN1A,CENPE,CSF2RB,DOK2,ELN,EPOR,EXO1,FBXO5,FIGNL1,FLT1,FOSL1,Hbb-b1,HBEGF,HDC,IFITM3,IL6,INHBA,IRF5,ITGB3,ITGB5,LCP1,LY75,LY96,MKI67,MME,MMP2,MNS1,MRC1,MYC,NCAPH,NDST1,NEK2,NFATC2,NR1H3,NR4A2,NRP1,NUSAP1,PIM1,PLD1,PLK1,PPARG,PRC1,PTGER4,PTGS2,RACGAP1,RAD51,RRM2,SLC2A4,Slfn2,SMC2,SPC25,SPP1,STEAP3,STMN…	769 (24)
SPDEF		transcription regulator	Activated	2.534	4.78e-09	CDKN1A,COL13A1,COL16A1,COL1A1,COL4A1,COL4A5,COL4A6,COL5A1,COL6A1,COL6A2,COL6A3,DKK3,EGFR,FGFR1,FZD8,ITGA6,KLK3,LAMB2,PLAUR,SDC2,SMAD1,SMAD3,TNC	527 (11)
PTGS2	1.21	enzyme		0.623	5.19e-09	ANGPT2,ANXA1,AQP1,BCL2,BRCA1,Ccl2,CCL5,CD68,CDKN1A,CXCL3,CYP1B1,DLK1,DYNLL1,ERBB2,FABP4,FLT1,FN1,GATA4,IGFBP3,IL6,ITGA6,KDR,LPL,MKI67,MMP2,MYC,NR4A2,PCNA,PPARG,PTGER1,PTGER4,PTGS2,SNAI1,SOST,STC1,TEK,TRAF1,VEGFA,VEGFC	685 (21)
IRS1	-0.805	enzyme		-0.037	5.36e-09	ACTC1,BMP6,BUB1,COL3A1,COL4A1,COL6A1,COL6A3,DLK1,EFNB2,FABP4,FASN,FHL1,FMO1,GJA1,IL6,INSR,IRS1,IRS2,LAMA4,LPL,MYC,MYOCD,NRP1,PPARG,SFRP2,SLC2A4,SNAI1,SPARCL1,SPP1,TGFBI,THRA,UCP2,VEGFA	634 (19)
KLF4	-0.257	transcription regulator		-1.286	5.65e-09	ACTA2,ACTC1,ADRB2,ALCAM,ALDH1A1,ALPL,ATP2A2,AXIN1,BMPR1A,CCNB1,CDKN1A,CENPE,COL1A1,CYP1A1,DSP,DUSP5,EFEMP1,ETV1,FLT1,FN1,FRZB,GATA4,GBX2,HEY1,HEY2,IFITM3,IL6,INHBA,IRS1,KDR,MRC1,MYC,MYH11,MYOCD,NOTCH4,NRP1,PDGFRA,PEG3,PLAT,PLAUR,Retnla,SEMA3F,SERPINA1,SMAD1,SOD3,SPHK1,Sprr2a1/Sprr2a2,TBX3,TEK,THBS1,TNC,USP18,VEGFA	649 (24)
JAG1	-0.235	growth factor		0.221	5.74e-09	ACTA2,CDKN1A,COL1A1,DTX1,DUSP2,DUSP5,DUSP8,HEY1,HEY2,HEYL,ITGB3,MYC,MYH11,NOTCH4,NR2F2,PDGFRB,SPP1	368 (18)
TCF		group			5.92e-09	ABCB1,ALDH1A1,APOD,ARL4A,BCL2,DIO2,EPHB3,GJA1,HTRA1,IRS1,KLK3,LGALS3,MME,MMP2,MYC,NRCAM,PCSK6,PTCH1,PTGS2,RCN1,SEMA3C,SERPINA1,SERPINA3,TK1,TOB2,TSC22D1,TSPAN8	741 (21)
methylselenic acid		chemical reagent		1.413	6.31e-09	ACPP,APOD,ATP11A,AURKA,B4GALT1,BIRC5,BLVRB,BRCA1,CADM1,CAMK4,CCNB1,CCNB2,CDC20,CDK1,CDK16,CDKN1A,CENPA,CENPF,CREB3L4,DHFR,DPYSL2,DYNLL1,FN1,GADD45A,HMMR,HOXD8,IGF1R,INPP4B,ITGB5,KIF20B,KLK3,MATN2,MKI67,MYC,NCOA1,NFIL3,NKX3-1,NQO1,PCNA,PEG3,PLK1,RAPGEF4,RGS10,RHOB,RHOQ,RRM2,SCD,TOP2A,TYMS,VEGFA,VEGFC	822 (22)
HOXA10	-0.737	transcription regulator		-1.48	6.64e-09	ADM,ALDH1A1,ALPL,AQP1,ARL4A,ATP1A2,CDKN1A,CLDN5,COL3A1,EGFR,ENPP2,FKBP3,FLT1,FN1,FST,FZD1,GJA1,HOXD9,IGFBP3,IGFBP5,ITGB3,KCNAB1,KRT18,LAMA2,LCN2,LEPR,ME1,Meis1,MICOS10-NBL1/NBL1,NCAM1,NCF2,PDPN,PEG3,PTGER4,REM1,S100B,SCD,SFRP4,SSPN,THRSP,XDH
MIR17HG		other	Activated	3.633	7.1e-09	ACTA2,ALPL,CDKN1A,CELSR1,COL5A1,ECE1,FNDC3B,FZD1,FZD2,FZD4,HEG1,HOPX,HSPG2,KLF2,LRP1,LRP4,LTBP1,MEGF8,NCOR2,PDGFRA,PKD1,PKD2,RECK,RGMA,RGS5,Sik1,SMAD6,SMOC1,SORT1,SOX4,TBX3,TOB2
CDKN2A		transcription regulator		-1.367	7.24e-09	ACTA2,ASF1B,AURKB,BCL2,BIRC5,CAPG,Ccl2,CCL5,Ccl6,Ccl7,CCNB1,CDCA5,CDK1,CDKN1A,CENPK,COL1A2,CXCL6,DDR1,DHFR,EBF1,EFNA1,EPS8,FBXO5,FGFR1,FST,GADD45G,GAS7,GNL3,GTSE1,HAUS1,HMGB2,HOXB9,IGFBP5,IL2RG,IL6,ITGB3,ITGB5,KLK3,LGALS3,MKI67,MMP2,MRC1,MYC,NKX3-1,PCNA,PDGFRB,PEG3,PLK1,PTGS2,RAD51AP1,RRM2,S100A6,TK1,TMPO,TOB2,VEGFA,VPREB1	669 (21)
RAF1	-0.061	kinase	Activated	3.585	7.65e-09	ACOT7,AKAP12,ANXA1,BCL2,CD74,CDKN1A,CHN1,CXCL3,DCBLD2,DIO2,DUSP2,DUSP5,EMCN,ERBB2,HBEGF,HDC,IGF1R,IGFBP3,IL6,ITGA2,ITGB3,ITGB5,MKI67,MYC,NGF,NQO1,PC,PCSK6,PLAT,PLAUR,PLD1,PTGS2,PTHLH,RET,RRM2,SEC14L2,SELENBP1,SLC16A7,SMAGP,SNRPD1,SQLE,TFPI2,TIMP1,TRAF1,TSC22D1,VEGFA	685 (19)
FGFR2	-1.555	kinase		0.587	8.19e-09	BCL2,CDKN1A,COL1A1,COL3A1,COL4A1,DAB2,FGFR2,FLRT3,FN1,FOXQ1,FST,GASK1B,GATA6,GJA1,IGF2,KBTBD11,LAMB1,MEST,MRAS,MYC,NOG,NOSTRIN,PCOLCE,PDGFRA,PLAUR,PTH1R,PTHLH,SFRP1,SNAI1,SPP1,TRPS1,TSPAN8,VEGFC	835 (23)
NKX2-1		transcription regulator		-0.434	9.31e-09	AGR2,AQP1,CD74,CHAD,COL9A1,CREB3L4,DIO2,EMP2,ENPP2,EPHB3,FGFR4,FOXF2,FOXQ1,Gsta4,HELLS,HMGB2,IGFBP6,IL7,LCK,LCN2,LRG1,MMP2,MYH11,PC,PDGFRA,PDPN,PGLYRP1,RAD51,RET,ROR1,RRM2,SCD,SEC14L2,SMAD7,SNAI1,Sprr2a1/Sprr2a2,THBS1,THY1,TMEM37,VEGFA,WNT5B
ANGPT2	1.866	growth factor		1.359	9.37e-09	ACTA2,ADA,ADAM12,BCL2,BCR,C1R,Ccl2,CCL5,CD68,CDKN1A,CFB,COL1A1,COL1A2,COL3A1,EGFR,EPHX2,ETS1,FLT4,FN1,GATA4,GATA6,IL6,KPNA2,LEPR,LYN,MGMT,MIF,MMP2,NME1,NOX4,OLR1,PDGFRB,POSTN,PTGS2,PTHLH,RCAN1,RHOB,SNAI1,SOD3,SRXN1,TEK,THBS1,THBS2	697 (18)
Ige		complex	Activated	3.346	9.46e-09	ABAT,ACTN1,ADAMTSL4,ANXA1,ASB2,ATP2A2,BAIAP2,BCL2,BCR,BIRC5,Ccl2,CCL5,Ccl7,CD74,CDKN1A,CHST8,CXCL3,CYCS,DUSP2,FLT1,FXYD6,HBA1/HBA2,HBEGF,HDC,HFE,HIP1R,IL33,IL6,LRMP,MAP3K8,MAPKAPK2,Marcks,MARCKSL1,MIF,MYC,NFKBIE,NRP1,PPAN,PPARG,PTGS2,PTPRS,RAMP3,RGS16,RPS6KA2,RSAD2,SCD,SDC3,SERPINB1,SLC37A2,SNRPD1,SPHK1,SPP1,TNC,TPPP3,TPST2,TRAF1,TRAF5,TSLP,TUBB6,VAV2,VEGFC	620 (19)
ZNF217		transcription regulator		-1.5	1.05e-08	ADM,AGR2,ANK3,ASF1B,CENPK,EPHX4,GATA4,HAPLN1,IFI16,IGFBP3,KLHL4,KRT18,LYPD1,MYC,MYO1B,NRK,PKP2,PLAT,RCAN1,SEC14L2,SEMA3A,ST3GAL6,WNT5B,ZHX2
Irgm1	-0.131	other	Inhibited	-4.166	1.08e-08	AURKB,BUB1,Ccl2,CCL5,CCNB1,CCNB2,CDCA3,IFI16,Ifi27l2a/Ifi27l2b,IL6,MKI67,NCAPG,NEK2,RRM2,RSAD2,TK1,UBE2C,USP18	401 (13)
dimethylnitrosamine		chemical toxicant		0.015	1.08e-08	ACTA2,Calm1 (includes others),CDKN1A,COL1A1,COL1A2,COL3A1,COL4A1,DES,FGFR4,IGF2,IGFBP5,IL6,Mt1,Mt2,NQO1,PCNA,PRKCZ,TIMP1	773 (19)
NR3C2	-0.331	ligand-dependent nuclear receptor		-1.002	1.17e-08	ABCC9,BCL2,BID,CACNA2D3,Ccl2,COL1A1,COL3A1,CYFIP2,DES,ECHDC2,FKBP1B,FN1,Gsta4,IGF1R,IL6,INHBA,KDR,NOX4,NR4A2,PGF,PLAT,PLIN4,PTGS2,RAPGEF4,RGS2,SEMA3C,SERP2,SERPINA3,TSPYL4,VEGFA,XIRP1	537 (18)
ERBB3		kinase		0.301	1.24e-08	ACTA2,BGN,CDKN1A,COL1A1,COL6A1,EGFR,ERBB2,FBLN2,FN1,HBA1/HBA2,Hbb-b1,Hbb-b2,HBEGF,IGF1R,IGF2,IGFBP5,LAMA4,MATN2,PLK1,PTGS2,SERPINA3,SFRP1,SNAI1,THBS1,TNC,VEGFA	700 (21)
E2F3	0.558	transcription regulator	Activated	3.076	1.28e-08	BIRC5,BOK,CCNB1,CCNB2,CD9,CDCA3,CDK1,CDKN1A,DAG1,DHFR,ECE1,ECHDC2,FBLN5,FBXO5,FGFR2,FST,HIST1H2BG,HIST1H2BN,HMGB2,HOXB9,IGF2,INHBA,KRT80,LAMA4,LPL,mir-24,MYC,PCNA,PLK1,POLA2,PTN,RAD51,RALGPS2,RRM2,SPARCL1,THBS1,TK1,TMPO,TPX2,UBE2C	665 (20)
simvastatin		chemical drug		-0.553	1.44e-08	ACTA2,ADRB2,ANGPT2,ANXA1,BCL2,BIRC5,BMP2,CD9,CDKN1A,COTL1,CXCL3,FADS1,FADS2,GJA1,HBA1/HBA2,Hbb-b1,Hbb-b2,HS3ST1,IGFBP3,IL6,KLF2,LCN2,LPL,Ly6a (includes others),MKI67,MMP2,MYC,MYH10,NCF2,NRIP1,NTRK2,OLR1,PGLYRP1,PLAT,PTGS2,RHOB,S100A6,S1PR3,SLC16A7,SLC2A4,SPP1,TIMM10,TIMP1,TYMS,VEGFA	653 (21)
EGFR	-1.3	kinase		0.966	1.55e-08	ABCG2,ACOT7,ACTA2,ANXA1,BCL2,BIRC5,CCL5,CDK1,CDKN1A,COL1A1,COL3A1,COL6A1,COL6A2,DAG1,EFNB2,EGFR,ERBB2,EREG,FASN,FBLN2,FOSL1,GADD45A,GJA1,Hbb-b1,Hbb-b2,HBEGF,HDC,HMGA1,IGF2,IGFBP3,IGFBP5,IL33,IL6,ITGA2,ITGA6,ITGB5,KLK3,LAMA4,LCN2,MATN2,MME,MMP2,MTHFR,MYC,PCNA,PLAT,PLAUR,PLK1,POSTN,PRKCZ,PTGER4,PTGIS,PTGS2,PTPRE,RANBP1,Retnla,RHOB,SERPINA3,SFRP1,SPHK1,ST3GAL2,TGFA,THBS1,TIMM10,TNC,TWIST1,VCAN,VEGFA…	740 (22)
benzo(a)pyrene		chemical toxicant		0.034	1.61e-08	ABCB1,ADAM12,ALDH3A1,ANXA1,BCL2,BIRC5,BRCA1,CDKN1A,CYP1A1,CYP1B1,ECT2,ENTPD5,EREG,FASN,FGFR3,FST,FZD1,GNA14,GNAI1,GNAQ,Gsta4,HSPA4L,IGFBP6,INHBA,INSR,KLF2,LCP1,LDB2,MAF,ME1,Mt2,NQO1,PCNA,PPP1R3C,PRKACA,PRKCQ,PTGS2,RGS5,SELENBP1,SEMA5A,SERPINA1,SFRP4,SLC1A4,SOD3,THBS1,VEGFA	680 (20)
Brd4	0.034	kinase	Inhibited	-2.034	1.63e-08	ACTA2,COL1A1,COL1A2,COL3A1,COL4A1,COL4A3,COL4A5,COL6A3,EDNRB,HBA1/HBA2,Hbb-b1,IL6,LGALS3,LOX,PLAT,SPON2,TIMP1,Tmsb4x (includes others)
EGR1	-0.546	transcription regulator		0.453	1.8e-08	ABCB1,ACE,ACTA2,ATP2A2,BAIAP2,Ccl2,Ccl6,Ccl7,CDC20,CDKN1A,COL1A1,COL1A2,CXCL3,CXCL6,EGFR,EIF4EBP1,EREG,FLT1,FN1,FOSL1,GADD45A,HBEGF,HPGD,HPSE,IGF1R,IGF2,ME1,MYC,PDGFC,PPARG,PTGS2,SLC12A2,SLC12A5,SLC4A2,SNAI1,SPP1,SQLE,STIM1,THBS1,TIMP1,VEGFA	710 (21)
genistein		chemical drug		0.24	1.91e-08	ABCB9,ACE,ACPP,ADM,ANGPTL4,ATP6V0A1,ATP6V0D2,BCL2,BIRC5,BMP2,BMP2K,Ccl2,CCL5,CCNB1,CCNB2,CD68,CD74,CDK1,CDKN1A,CHPF,CKLF,COL1A1,CTSF,CXCL3,CXCL6,CYP1A1,ERBB2,EREG,FXYD5,GLCE,GNPTAB,GNS,HOXA10,HPGD,HS3ST3A1,IGF1R,IL6,KCNJ2,KLK3,LAPTM5,LBP,LGMN,LPL,MMP2,MMRN1,Mt1,MYC,NR1H3,PCDH17,PCNA,PER1,PGR,PIM1,PLA2G7,PLAT,PLK1,PPARG,PTGS2,SGSH,SH2B2,SLC26A6,SLC4A4,SORT1,SPHK1,SPP1,ST3GAL2,SUMF1,VEGFA,ZEB2	651 (20)
RASSF1	0.403	other		-0.346	2.08e-08	ABAT,ABCB1,ALDH1A1,AMIGO2,BCL2,CDKN1A,COL13A1,COL4A1,DAB2,DACH1,EFEMP1,EFNB2,EGFR,HBEGF,IGFBP3,LDB2,MGMT,MMP2,MRAS,MYC,NOG,PLK2,PTGS2,SAMD5,SPP1,SRPX	786 (22)
CEBPA		transcription regulator		1.591	2.09e-08	ABCB1,ADCY7,AKAP12,ANXA1,ASNS,ASS1,BCL2,BIK,CCNB2,CDKN1A,CKAP4,COL1A1,COL1A2,CYCS,DHFR,EBF1,EFNB2,EMCN,F8,FABP4,FASN,FHL1,FLT1,FZD1,G0S2,GADD45A,GAS1,GATA6,GBX2,GJA1,HMGA1,HPGD,HSD11B1,IGFBP3,IL6,INSR,IRS1,IRS2,ITGB5,KCNMB1,LCK,LCN2,LEPR,LPL,Ly6a (includes others),LYL1,MAPKAPK2,MMRN1,MYC,NFATC2,NFIL3,NR4A2,NRP1,OLR1,OXTR,PCNA,PCSK6,PLOD2,PPARG,PPP1R3C,PTGS2,PTPRE,RGS2,SBSN,SCD,SERPINB1,SLC2A4,SPP…	701 (23)
bucladesine		chemical toxicant		-0.054	2.16e-08	ADM,ALDH3A1,ANXA1,ASS1,BCL2,CASZ1,CDKN1A,CXCL3,DIO2,EGLN3,ERBB2,ETNK1,FAH,FGFR1,FOSL1,FRRS1,FST,FSTL3,GAP43,HS3ST1,HSD11B1,IGF1R,IGF2,IGFBP3,IGFBP5,IGFBP6,IL6,IRS2,KCTD3,LPCAT1,MCAM,MMP2,Mt1,MYC,NCAM1,NGF,NR4A2,PCDH1,PDE10A,PDE5A,PDGFRA,PGR,PLK2,PTCH1,PTGER4,PTGS2,PTH1R,PTPN21,RARB,RET,RGS16,RGS2,S100B,Sik1,SLC2A4,SLC6A4,SMAD3,STC1,TC2N,TIMP1,TIMP2,XAF1,ZEB2	823 (23)
LIN9	-0.155	other	Activated	2.27	2.2e-08	AURKA,BIRC5,BUB1,CCNB1,CDK1,CDKN1A,CENPE,CEP55,DLGAP5,PLK1,TMPO,UBE2C
CEBPB	1.347	transcription regulator	Activated	2.718	2.27e-08	ABCB1,ACTA2,ADM,ALDH1A1,ANTXR1,ASNS,BCL2,Ccl2,CCL5,CCNB2,CD1D,CDKN1A,COL1A1,COL1A2,CXCL3,CYP1A1,DAB2,DHFR,DYNLT1,EFNB2,EMCN,ENTPD2,F8,FABP4,FBLN1,FGFR2,FHL1,FZD1,GADD45A,GAS1,HDC,HMGA1,HSD11B1,IFITM3,IGFBP3,IL6,IL7,INSR,IRS1,IRS2,KRT18,LBP,LCN2,LEPR,LY96,LYN,MYC,NDRG4,NFATC2,NFE2L1,NR1H3,NRP1,OXTR,PCNA,PDGFRA,PLAUR,PPARG,PRG2,PRKAR2B,PTGS2,RAD18,RCAN1,RGS4,SBSN,SCD,SERPINA1,SLC12A2,SPP1,UPP1,VCAN…	689 (20)
triamcinolone acetonide		chemical drug		-1.188	2.32e-08	ADCY7,ANGPTL4,AQP1,ATP10A,BCL2,BID,BMP2,BMP6,CAPG,COL13A1,CSNK1G2,DCBLD2,EFNB2,EFS,ELK3,FGFR2,GAS1,HFE,IGFBP3,INSIG1,KCNB1,KIF4A,KLF15,MYC,PCDH19,PER1,PKD2,PLK2,PLXNC1,RAPGEF2,RASL11B,RGS16,RGS2,SCD,SERPINA3,SFRP2,SLC16A1,SOX4,SPP1,SPRY1,ST3GAL5,STC2,TCF7L2,TRIB1	521 (14)
E2F4	0.107	transcription regulator		-1.982	2.49e-08	ASF1B,AURKB,BCL2,BRCA1,CDK1,CDKN1A,CENPA,CENPE,CKS2,DBF4,DHFR,DUOX2,ECT2,EPAS1,EXOSC8,HMMR,KIF22,KIF4A,LPAR1,MKI67,MYC,NDC80,NEK2,NFE2L1,PCNA,PLK1,POLA2,PPARG,PRC1,PSAT1,RAD51,RAD51AP1,RANBP1,RRM2,SFRP1,SMC2,SMC4,STMN1,TEAD4,TK1,TMPO,TOP2A,TPX2,TTK,UBE2C,UBE2T	447 (7)
SPP1	2.44	cytokine		1.22	2.49e-08	ABCG2,AURKA,BCL2,BRCA1,Ccl2,CCL5,CD9,CDC20,CDKN1A,COL1A1,CXCL3,CXCL6,DSP,EGFR,EPDR1,ERBB2,FGFR2,FN1,IL6,INSIG1,ITGA2,ITGB3,ITGB5,KRT18,LOX,MMP2,MYC,NDUFS8,NRCAM,POR,PPARG,PTGS2,S100A4,S100A6,SEMA6C,SNAI1,SPARCL1,SPP1,TIMP1,VEGFA	421 (17)
S100A6	0.796	transporter		1.604	2.56e-08	AURKA,CDK1,CDKN3,CENPA,DEPDC1,EXOSC8,HS3ST1,INHBA,NCAPH,NEK2,PBK,STC1,TMPO,TYMS	470 (7)
ARRB1	-0.396	other		-1.093	2.56e-08	ABCG2,ADRB2,BCL2,Ccl2,EGFR,ENAH,FABP4,FASN,IL6,IRS2,LPL,MYC,PTGS2,SPP1	742 (26)
SMO	-0.783	G-protein coupled receptor		0.038	2.61e-08	ALCAM,BCL2,BGN,CASC4,Cux1,DIXDC1,FBLN2,FOXC2,FOXF2,FZD2,FZD7,KLK3,MYC,NCAM1,NOG,NRCAM,NRP2,OGN,PRSS35,PTCH1,SOX5,SYNM,TGFA,VCAN,WIF1	601 (17)
IKZF1		transcription regulator		0.627	2.61e-08	4732416N19Rik,AQP1,AXL,C1QTNF1,CDKN1A,CYP7B1,DTX1,EBF1,EPOR,FGF13,FGFR1,FGFR4,GP1BA,GPR68,IFI16,IL6,KIF23,LCK,LHFPL2,LHFPL6,LRP1,LYN,MYC,MYO1B,NCAM1,NRARP,PRKCQ,PTH1R,RAPGEF4,SLC19A1,SLC27A3,SPN,SULF2,VIPR1,VPREB1	511 (11)
tetrachlorodibenzodioxin		chemical toxicant		0.709	2.68e-08	ABCB1,ABCG2,ACOT2,ACTN1,ADM,ALDH3A1,APH1B,ASNS,ATP2B1,BCL2,CAP2,CCL21,CCL5,CD36,CDH13,CDKN1A,COL13A1,COL4A5,COL6A1,CYP1A1,CYP1B1,CYP4B1,DHFR,EBF1,EGFR,ELN,ERBB2,FMO3,FZD7,HDAC11,HDAC9,HOXD10,IGF2,IL10RA,IL6,INPP5A,IRS1,ITGA7,KLF2,LTC4S,MICOS10-NBL1/NBL1,MYC,MYH11,NME1,NPTX1,NQO1,PCNA,Pcp4l1,PERP,PGR,PRKAR2B,PTGS2,S100A4,SLC2A4,SLC4A2,SLCO2B1,Sprr2a1/Sprr2a2,STC2,STEAP4,TBXA2R,TGFA,TK1,TNC,TNFAIP8…	759 (21)
IL13		cytokine	Activated	2.071	2.91e-08	ADA,ADORA2A,AVPI1,BATF,BID,Ccl2,CCL5,Ccl6,Ccl7,CD36,CFI,CHN2,CLCA1,COL1A1,COL1A2,COL3A1,COL6A2,CTNNAL1,CXCL3,CXCL6,EGFR,ENPP2,EPAS1,FABP4,FADS1,FADS2,G0S2,GAS7,HDC,HPSE,HSD11B1,HTRA1,IL13RA1,IL31RA,IL6,LTBP1,MAF,MMP2,MN1,MRC1,MTSS1,NCAPH,PDGFC,PID1,PLXNC1,POSTN,PPARG,PTGS2,Retnla,RFTN1,RPS6KA2,SAMSN1,SERPINA1,SLC26A4,SLC26A6,SLC7A2,SORT1,SPHK1,SPP1,Sprr2a1/Sprr2a2,ST3GAL6,THBS1,TIMP1,TIMP2,TNFRSF…	501 (18)
RUNX1		transcription regulator		0.315	2.92e-08	ADAMTSL4,ALCAM,ALOX12,ARL5C,ATP8A2,CDKN1A,CSF2RB,EPAS1,FSCN1,GNA15,GPAM,HAPLN1,HBA1/HBA2,HEY2,IGFBP3,ITGA2,ITGA9,ITGB3,KLF2,KRT80,LMO1,Ly6a (includes others),Mt1,MYH10,NCAM1,NFIL3,NR2F2,POU6F1,PRKCQ,SGPP1,SLC22A4,SLC24A3,SOX5,SPP1,ST3GAL5,STX3,TIMP1,UNC5B,UPP1,VEGFA	821 (23)
camptothecin		chemical drug		1.276	3.3e-08	ABCB1,ACTA2,AEN,AK4,ARL4A,ASPM,AURKA,BCL2,BID,BIRC5,BRCA1,CCNB1,CD1D,CDC42EP2,CDK1,CDKN1A,CSNK1G2,CXCL3,CXCL6,EGFR,EPOR,FGL2,FKBP3,FLT1,FNDC3B,FOXC1,FSCN1,FXN,FZD7,GADD45A,GADD45G,GBX2,GNAQ,GRINA,HBEGF,IFI16,IGFBP3,IL10RA,IL13RA1,IL17RA,IL6,INSIG1,ITGA7,KLHL21,LAMB2,LGALS3,LHX6,LY75,MAPK8IP1,MARCKSL1,MGMT,MICAL3,MPZL1,Mt1,MYC,NEK2,NFKBIE,NR4A2,NRP1,PARD3,PCNA,PEG3,PERP,PGLYRP1,PLAC8,PLD1,PPP1R3D,…	690 (22)
NOTCH1	-0.615	transcription regulator		-1.166	3.86e-08	ACTA2,ASB2,BCL2,BMP2,CD68,CDCA7,CDKN1A,CNN1,COL1A1,COL1A2,CSF2RB,DES,DLK1,DTX1,ECT2,EFNB2,EGFR,ERBB2,FLT1,FOSL1,GAA,HBA1/HBA2,HEY1,HEY2,HEYL,IFI16,IGF1R,IGFBP3,IL6,IRF8,ITGA6,LOX,Ly6a (includes others),LYVE1,MCAM,MMP2,MYC,MYH11,NR2F2,PDGFRB,PPARG,PROX1,PTGS2,RGS5,SNAI1,SOST,SPP1,TEK,TSLP,VEGFA	716 (23)
SHH		peptidase		0.425	4.04e-08	ABCG2,ANGPT2,BCL2,BMP2,BMPR1B,BRCA1,DHFR,DTX1,EBF1,EGFR,EIF2AK3,FN1,FOXC2,GATA4,GBX2,HELLS,HEY1,HEY2,HMGA1,IGF2,IGFBP5,IL6,MYC,NR2F2,PAX9,PCNA,PDGFRA,PGF,PLAT,PPARG,PSMC3IP,PTCH1,PTHLH,RAD51,SFRP1,SFRP2,SMAD1,SPP1,TYMS	684 (25)
LIPE	-0.026	enzyme		1.676	4.1e-08	ALDH1A1,AQP1,CD36,CD74,COL1A1,COL1A2,DMPK,FABP4,FASN,FMOD,G0S2,GJA1,ITGA6,LYL1,MAPKAPK2,MEOX2,NRIP1,PAM,PC,PER1,POLR2K,POSTN,PPARG,PTGS2,RARB,RGS5,SCD,SLC2A4,SMAD7,ST3GAL5,THRSP	556 (22)
Pdgf (complex)		complex	Activated	2.194	4.3e-08	BCL2,Ccl2,CDKN1A,COL4A1,CXCL3,EGFR,FN1,GJA1,HEY1,HEY2,INHBA,IRS2,ITGB3,MEOX2,MMP2,MYC,NCAM1,NOX4,NR4A2,PCNA,PLAUR,PPARG,PTGS2,SV2A,TIMP1,TWIST1,VEGFA	650 (19)
UPF2	0.343	other		1.612	4.42e-08	CACNB2,CYFIP2,DSP,HEY1,KHDRBS3,NEO1,NRP1,PTGS2,PTPN21,PYGM,RCAN1,TSPAN12,TSPAN13,TSPAN8
bexarotene		chemical drug		0.034	4.61e-08	ADRB2,ALCAM,ASNS,AXL,BCL2,BMP6,CCDC107,Ccl2,CYCS,DACH1,DLK1,DUSP5,EFNA5,EGFR,FABP4,Gm1673,GPM6B,GRIN3A,Gsta4,IGFBP6,LPL,LRP4,MAF,MAP3K8,Meis1,NR4A2,NRP2,NTRK2,NTS,PLAT,PLAUR,PLOD2,PNO1,PPARG,PTGS2,RARB,RET,Retnla,SCD,SLC18A2,TGFA	698 (21)
IKBKG	-0.286	kinase		1.092	4.86e-08	ATP2A2,BMP2,Ccl2,CCL5,CDH13,CH25H,CTSF,CXCL3,CXCL6,CYP7B1,ENPP2,EPAS1,EREG,FOXC2,FOXF2,IFI16,IGFBP6,IL6,KCNH2,LCN2,Mt1,Mt2,NGF,OGN,PPARG,RCAN1,RGS16,SEMA3C,SFRP1,Slfn2,SOD3,TRPC1,VEGFA	711 (16)
STAT6	-0.286	transcription regulator		0.292	4.97e-08	ABLIM1,ADAM11,ANO1,ANXA1,APOLD1,ARID5A,ASS1,BCL2,Ccl2,CCL5,Ccl6,CDKN1A,Cmah,CNRIP1,COL1A1,COL1A2,CRIP1,CXCL3,FABP4,FASN,FLRT2,FNIP2,FSCN1,GADD45G,GATM,GNA14,GNA15,GPM6B,HMGCS2,IFI16,IFITM3,IL10RA,IL31RA,IL33,IL6,IRS2,ITPK1,KCTD12,Ly6a (includes others),LY75,MAF,MMP2,MMP28,NFATC2,NFIL3,PDGFC,PLD1,PREX1,PTGS2,RASGRP3,Retnla,RIPK3,S100A10,SAMSN1,SELENBP1,SERPINA1,SOX13,SPHK1,TES,THY1,TIMP1,TMED8,TMT…	547 (17)
tazemetostat		chemical drug		0.035	5.33e-08	BAIAP2,BID,BMPR1A,CAP2,CDCA7,CDK16,DNM3,EFNA3,EFNB2,EGFR,ELOVL6,EPHA3,EPHB3,ERBB2,FGFR1,FLRT3,FN1,FOXC1,GAP43,GATA6,HOXA10,HOXB9,IGF2BP2,IGSF9,INPPL1,KIF7,LOX,LTBP1,MICALL2,MYC,MYO1B,NCAM1,NPNT,NQO1,NR4A2,PCNA,PGR,PLK2,PLXNA3,PREX1,PSAT1,RAPGEF2,RET,ROBO1,SDC2,SEMA3C,SLC43A1,SMAD1,SMAD3,SMO,SPP1,STC2,TNC,ULK1,VCAN
SP2509		chemical reagent		0.035	5.33e-08	BAIAP2,BID,BMPR1A,CAP2,CDCA7,CDK16,DNM3,EFNA3,EFNB2,EGFR,ELOVL6,EPHA3,EPHB3,ERBB2,FGFR1,FLRT3,FN1,FOXC1,GAP43,GATA6,HOXA10,HOXB9,IGF2BP2,IGSF9,INPPL1,KIF7,LOX,LTBP1,MICALL2,MYC,MYO1B,NCAM1,NPNT,NQO1,NR4A2,PCNA,PGR,PLK2,PLXNA3,PREX1,PSAT1,RAPGEF2,RET,ROBO1,SDC2,SEMA3C,SLC43A1,SMAD1,SMAD3,SMO,SPP1,STC2,TNC,ULK1,VCAN
TBX5		transcription regulator		-0.737	5.48e-08	ACTC1,ATP2A2,BIRC5,Ccl6,COL1A1,COL1A2,COL3A1,CXCL6,DES,GATA4,GJA1,GJA5,HEY2,HSPB7,IFI16,IL6,KCNJ2,NFATC2,NFATC4,POSTN,PTGS2,PTPRB,S100A4,SCN5A	593 (13)
BSCL2	0.013	other			5.53e-08	AATK,AOC3,Ccl2,Ccl7,CD36,CD74,CYFIP2,FABP4,HMGA1,IGFBP5,IL33,IL6,LPL,NAT8L,PC,PPARG,PTGS2,RSAD2,SLC2A4,THRSP,TIMP1	412 (9)
RABL6		other	Activated	3.71	5.53e-08	ABAT,AURKB,BIK,BUB1,CCNB1,CENPF,HBEGF,HMMR,KIF23,MYC,NCAPG,NDC80,NEK2,PBK,PLK1,PRC1,SMAD6,TOP2A,TPX2,TTK,UBE2C	468 (7)
Sos		group			6.03e-08	ADAM12,AMIGO1,ANK3,B4GALT1,CADM1,CASZ1,COL16A1,DAPK2,ELOVL6,ENAH,EPS8,FABP4,FBLIM1,FLRT2,GATA4,HBA1/HBA2,Hbb-b1,HIPK3,HMMR,IGFBP5,IRS2,ITGA6,LTBP3,MMRN1,Mt2,NFIL3,NPTX1,NRIP1,PDPN,PKN1,PLD1,PLK2,PTGS2,PTH1R,PTPRZ1,RGMA,SCD,SIRPA,SMAD7,STMN1,XDH,ZHX2
let-7		microRNA		-1.342	6.03e-08	ACTA2,AURKA,AURKB,BMPR1A,BRCA1,BUB1,CCNB1,CDC20,CDCA2,CDCA3,CDCA5,CDCA7,CDCA8,CDK1,COL1A1,COL1A2,COL3A1,DBF4,DLC1,FN1,FOSL1,GAB2,HBA1/HBA2,Hbb-b1,Hbb-b2,HMGA1,IGF1R,IGF2BP2,IL6,IRS2,ITGB3,MYC,PLAUR,PNO1,PTGS2,RBM38,RCAN1,RRM2,S100A4,SCD,THBS1,TRIB1	605 (21)
HDAC4	-0.091	transcription regulator		-0.016	6.1e-08	ANGPTL4,CACNA2D1,CAP2,CCNB1,CDKN1A,CHN1,CHRDL1,CYFIP2,DGKB,FGF13,FOSL1,FST,GADD45A,GPM6A,HDAC9,IL6,KLF2,LDB2,MYH10,NECAB1,NR4A2,NRCAM,Pcp4l1,PTGS2,RGS2,RGS4,RGS7,SGCG,SLC2A4,TSPAN13,VEGFA	560 (21)
SP600125		chemical - kinase inhibitor		0.095	6.58e-08	ABCB1,ADAMTS4,ADAMTS9,ADM,AQP1,BCL2,Ccl2,CCL5,CCNB1,CDK1,CDKN1A,CKAP4,COL1A1,COL4A1,CSPG4,CXCL3,CYP1A1,FABP5,FASN,FLRT3,FN1,FOXQ1,GADD45A,GATA4,GNS,HIST1H2BN,IL6,INHBA,IRS1,ITGA2,ITGA6,ITGB5,LAPTM5,MAPK8IP1,MTHFR,PDGFRA,PDGFRB,PER1,PGR,PLK2,POSTN,PPARG,PSMA8,PTGS2,RARB,RGS4,SCD,SPHK1,SPP1,TCF7L2,THBS1,THBS2,TWIST1,VEGFA	794 (23)
DNMT3B	0.11	enzyme		-0.525	6.58e-08	ACTC1,ADCY5,ATP2A2,BIK,CAMK4,CASQ1,CCL5,CD36,CDK1,CDKN1A,CYP1B1,DLC1,EMILIN2,EPDR1,FOXF2,GATA4,GLT8D2,HDAC9,IRF5,KDELR3,KDR,MYC,NFATC2,PNPLA3,PPM1J,PPP1R3C,PRKAR1B,PSEN2,PTN,RAB39B,RCAN1,RCAN2,RECK,RGS16,RGS4,SFRP2,SFRP4,TRPC3	345 (9)
MECP2	0.109	transcription regulator		-0.084	6.75e-08	ABCB1,ADAM12,ANXA1,BRCA1,CAPG,DOCK8,DPYSL2,EFNA5,GSTO1,HBA1/HBA2,HOXD9,IGFBP3,LMNA,Meg3,MGMT,Mt1,MYC,NPY1R,PTGS2,RAB39B,RARB,RELN,S100A4,SCN3A,SEMA3D,SLC12A5,SPN,SRPX2,TFPI2,VEGFA	682 (24)
SMAD4	0.003	transcription regulator		0.662	7.04e-08	AGR2,ANGPT2,ANGPTL4,BGN,BMP2,Ccl2,CDH5,CDKN1A,COL1A2,EGFR,EIF4EBP1,ERBB2,EREG,FGFR3,FN1,FSCN1,FST,FSTL3,GADD45A,GJA1,ITGA6,ITGB5,JAG2,KLK11,LPAR1,MST1R,MYC,NPPC,NPR2,PDGFRB,POR,PTGS2,PTHLH,S1PR4,SCD,SKIL,SMAD3,SMAD6,SMAD7,SMO,SNAI1,SPHK1,TBX3,THBS1,TIMP1,TNC,VEGFA	630 (20)
EIF4E	0.211	translation regulator	Activated	2.236	7.71e-08	ADAMTS15,BCL2,BIK,BIRC5,CAPG,Ccl2,CDKN1A,CKS2,EGFR,EIF4EBP1,EREG,FN1,Fndc1,FOSL1,INSIG1,LSM2,LSM7,MYC,NHP2,NRP1,PCNA,PGF,PIM1,PLAUR,POP7,PRG2,SLC6A4,SNAI1,SPHK1,SRXN1,TGFA,TGFBI,TNC,UBE2C,UPP1,VEGFC	706 (20)
RUNX2		transcription regulator		0.204	8.24e-08	ABCB1,ACTA2,ALPL,BCL2,BIRC5,BMP2,CDKN1A,COL1A1,COL1A2,DPYSL3,FGFR2,FLRT2,FN1,HAPLN1,HTRA1,IGF1R,ITGBL1,LGALS3,MKI67,MMP2,MYH11,SGPP1,SMAD6,SNAI1,SOST,SOX5,SPP1,ST3GAL5,TIMP1,VEGFA	617 (19)
INSIG1	-0.842	other		-0.995	8.48e-08	CCL5,CD68,CXCL3,CXCL6,DLK1,ELOVL6,FABP4,FABP5,FADS1,FADS2,FASN,GPAM,HMGCS2,IL6,IRF8,IRS2,LCN2,LPL,MRC1,OLR1,PLA2G4F,PLA2G7,PLD1,PPARG,SCD,SQLE,UCP2	626 (12)
L-dopa		chemical - endogenous mammalian		0.166	9.08e-08	ABI3,ACTA2,ADORA2A,ALPL,AMIGO2,APBA2,ARAP1,ARHGEF19,ATP2A2,AXL,BCL2,BICC1,CACNA2D3,CACNB2,CAPG,CASZ1,CDC42EP2,CHST8,CLDN5,CLIP4,CMTM8,COL4A1,CORO2B,COTL1,CYTH4,DGKB,DIXDC1,DLGAP1,DLK1,DNAJC2,ECE1,EDNRB,EFNA5,EPOR,FAH,FBLN1,FBLN2,FOSL1,FXYD5,GABRA3,GAS7,GNS,GPR39,HBEGF,HVCN1,IGFBP5,KCNAB1,KCNC4,LAPTM5,LDB2,LMNA,LRRC1,LTBP1,LYPD1,MAPK11,MYO1B,NDUFA8,NOMO1 (includes others),Nos1ap,NPM3,NRARP,NTRK3,P…
MYOCD	-2.079	transcription regulator		-1.508	9.1e-08	ACTA2,ACTC1,ATP2A2,CDKN1A,CNN1,COL1A1,COL1A2,COL3A1,DES,EIF2AK3,FN1,GATA4,GJA1,GJA5,HEY2,HSPB7,KCNMB1,LMOD1,MYH11,NFATC2,PTPRB,S100A4,SCN5A,VCAN,VEGFA	182 (8)
Ins1		other		-0.543	9.62e-08	ANGPTL4,ATP1A1,ATP1A2,CCL5,CDKN1A,CNN1,COL1A1,CYP1A1,DHFR,DLK1,DYNLL1,EIF4EBP1,ELOVL6,FABP4,FADS1,FADS2,FASN,FOXC2,GSK3A,IGF1R,IGF2,IGFBP3,IGFBP5,IL6,INSR,IRS1,IRS2,ITGA6,LPL,LRP1,Marcks,MIF,MMP2,Mt1,MYC,NGF,NR1H3,PCNA,PER1,PGR,PIK3R2,PLAT,PPARG,PRKCQ,PTGS2,RRM2,SCD,SLC2A4,THRSP,THY1,TIMP1,TIMP2,TK1,VAMP5,VEGFA,ZNF106	759 (18)
NOTCH3	-0.462	transcription regulator		-1.187	9.76e-08	ACTA2,ACTN1,APOD,BCL2,BIRC5,CDKN1A,COL5A1,DES,DLGAP5,DTX1,FN1,HEY1,HEY2,MYH11,NRARP,PDGFRB,PRKCQ,RGS5,SDC2	662 (20)
FOXC2	-0.89	transcription regulator		-0.134	9.76e-08	ACTA2,ADRB2,EFNB2,FABP4,FN1,INSR,IRS1,IRS2,ITGB3,ITGB5,KDR,LPL,MMP2,PDGFRB,PPARG,PTGS2,SLC2A4,SNAI1,TCF15	732 (25)
cisplatin		chemical drug	Activated	3.301	1.06e-07	ABL1,ACTA2,ANK1,ANXA1,AQP1,ARHGEF10L,ASNS,BCL2,BIRC5,BLOC1S2,BRCA1,Ccl2,CCL5,CCNB1,CD68,CDK1,CDKN1A,CLCA1,CLIP4,CMBL,COL1A1,CUL9,CXCL3,ECE1,EPS8L2,FABP4,FASN,FBLIM1,FLT1,FN1,FNDC3B,FOSL1,FXN,FXYD5,G0S2,GADD45A,GAP43,GAS1,HBA1/HBA2,HDAC9,HEYL,HSPA4L,HYAL1,IGF1R,IGFBP3,IL10RA,IL6,ITGA7,KCNK5,KIAA1522,KLK3,LAMB1,LAMC2,LATS2,LBP,LCN2,LGALS3,LMNA,LRMP,MARCH8,MCAM,MGMT,MICALL2,MMP2,MRC1,Mt1,MTMR3,MYC,N…	681 (18)
mibolerone		chemical drug		-1.237	1.15e-07	ALCAM,ALDH3A1,BMP6,CD74,CDK1,CLEC11A,COL1A1,COL1A2,COL6A3,DBI,FHL1,GADD45G,HYOU1,IGFBP3,KLK3,LPL,LRG1,MME,MYC,NKX3-1,NME1,PCNA,PRELP,PTPN20,SPARCL1,SQLE,STMN1,TGFBI,TK1,TOP2A,UCP2,USP18	452 (7)
PDGFB	0.395	growth factor		0.024	1.18e-07	ACTA2,CNN1,COL1A1,COL1A2,FN1,IL6,KLF2,MMP2,MYC,PDGFRB,PTGS2,RGS5,RIPK3,S1PR2,SMAD1,SPP1,THBS1,TIMP1,TNC,VEGFA	700 (21)
NOSTRIN	2.252	transcription regulator		-0.246	1.22e-07	ACE,BCL2,Ccl2,CCL5,FLT1,FN1,IL6,ITGB3,KDR,MMP2,NPR1,PGF,TEK,THBS1	556 (17)
CCN1		other		1.199	1.49e-07	BOK,Ccl2,Ccl7,CDKN1A,COL1A1,COL1A2,CXCL3,FN1,FZD7,FZD8,IL6,ITGA2,ITGB3,KDR,MIF,MMP2,MYC,PTGS2,SFRP1,TIMP1,TIMP2,VEGFA,VEGFC,WIF1	646 (23)
losartan potassium		chemical drug		0.266	1.49e-07	ACE,AQP1,ARAP1,ATP1A1,ATP2A2,Ccl2,CD36,COL1A1,COL3A1,CXCL3,FN1,GJA1,IL6,ITGB5,MMP2,NOX4,NPR1,OLR1,PDE3A,POSTN,PTGS2,PTH1R,PTHLH,SPP1,TEK,TIMP1,UCP2,VEGFA	538 (25)
D-fructose		chemical - endogenous mammalian		-0.52	1.59e-07	ACTA2,Ccl2,Ccl7,CD68,COL1A1,COL3A1,FABP4,FASN,FN1,IL6,MMP2,PPARG,SCD,SLC2A4,THBS1,TIMP1	748 (20)
THRB	-0.769	ligand-dependent nuclear receptor		-1.652	1.77e-07	ATP2A2,Ccl2,CCNB1,CXCL3,EGFR,FABP4,FASN,FGFR1,FGFR3,FOSL1,FRZB,FSTL1,FZD1,FZD4,FZD7,FZD8,GJA5,IGF1R,IGFBP3,IL6,IL7,KCNMA1,LPL,ME1,MMP2,NCOR2,NME1,NR1H3,PAM,PER1,POR,PPARG,PTGS2,SFRP1,SFRP2,SFRP4,SLC2A4,TGFBI,THRB,THRSP,WIF1,WNT2,WNT5B	595 (20)
INSR	1.003	kinase		0.402	1.78e-07	ACOT2,AQP1,ARL4A,BIRC5,Calm1 (includes others),Ccl2,CD36,CDK1,CDKN1A,COL6A3,CORO2B,CSTB,CYCS,CYP1B1,DAG1,DES,DLK1,EREG,FABP4,FASN,FBLN1,FHL1,FOXC2,FURIN,GADD45A,GAS1,GATA6,GRB7,HBEGF,HELLS,IGF1R,IGF2,IL6,INSR,IRS1,ITGB5,LCP1,LDB2,LEPR,LTC4S,MARCKSL1,Meg3,MMP2,MYC,NGF,NR1H3,OGN,OLR1,PIM1,PRKCQ,RAD51,RAD51AP1,RGS16,RHOB,RRM2,RTN2,SCD,SLC2A4,SQLE,THBS2,THRA,TRAIP,TSC22D1,TWIST1,UCP2,ULK2	729 (22)
Akt		group		1.82	1.79e-07	ACTA2,ADM,BCL2,BID,BIRC5,BMP2,BRCA1,Ccl2,CD36,CDKN1A,COL3A1,EGFR,EPAS1,ETS1,FABP4,FN1,FOSL1,HPGD,IGF1R,IGF2,IL6,INSR,LCN2,LMNA,LPL,MCAM,MMP2,MYC,NFIL3,NOX4,NRP2,PCNA,PGR,PPARG,PSMD10,PTGER4,PTGS2,PTN,RAD51,RASD1,RHOB,RRM2,SLC2A4,SNAI1,SOX4,SPP1,THBS1,THBS2,TNC,TNFRSF11A,VCAN,VEGFA	750 (20)
NFYA	-0.169	transcription regulator		-0.47	1.89e-07	ABCB1,BCL2,BIK,CBS/CBSL,CCNB1,CCNB2,CDCA8,CDK1,CDKN1A,COL1A2,CYP1A1,F8,FASN,FGFR2,GADD45A,GPAM,NPR1,PDGFRB,RGS4,RHOB,RRM2,SCD,THRSP,TOP2A	584 (19)
imipramine blue		chemical drug	Inhibited	-2.135	1.94e-07	AURKA,CCNB1,CENPA,CENPE,CENPF,CENPK,CERK,CYP4B1,EXO1,FOXQ1,GADD45A,PCNA,PLK1,STMN1
PGR	-0.993	ligand-dependent nuclear receptor		0.205	1.97e-07	ABCG2,AK4,BUB1,CCNB1,CCNB2,CD36,CDC20,CDK1,CDKN1A,CKAP4,COL6A1,COL6A2,DPYSL2,DYNLL1,EFNA3,EGFR,EPAS1,EPHA1,ERBB2,FN1,FOXC1,GPR160,HBA1/HBA2,HBEGF,HPGD,IGFBP5,IRS1,IRS2,ITGA6,KRT18,LAMB2,MPHOSPH10,MTSS1,MYC,NOP16,PCDH1,PCNA,PFKFB3,PGR,PLK2,POSTN,PPARG,PTGS2,S100A6,SERPINA1,STC1,TGFBI,TK1,TNC,TRAF5,VCAN	807 (22)
CSF1	-0.148	cytokine	Activated	2.061	2.03e-07	BCL2,BIRC5,Ccl2,CCL5,Ccl7,CCNB1,CD68,CDKN1A,COL23A1,CXCL3,CXCL6,DOK2,DUSP5,FN1,GPR68,IGF1R,IL10RA,IL6,IRF5,IRF8,ITGB3,ITGB5,JDP2,MMP16,MRC1,MYC,NCF2,PCNA,PFKFB3,PGR,PIK3R2,PPARG,PTPRJ,Retnla,SFRP1,SLC16A3,SLFN12L,SQLE,STX3,THBS1,TNFRSF11A,TRAIP,VEGFA	657 (17)
miR-199a-5p (and other miRNAs w/seed CCAGUGU)		mature microRNA		0.529	2.31e-07	ACTG2,BGN,BIRC5,CDKN1A,CELSR1,COL1A1,COL4A1,COL4A5,CSTB,DDR1,ETS1,FN1,ITGB3,KLF2,LAMC2,LCN2,MYH11,MYOCD,RSAD2,WNT5B,ZBP1
Smad2/3-Smad4		complex		0.166	2.37e-07	BCL2,CDKN1A,COL1A1,COL1A2,IGFBP3,IGFBP5,ITGB5,MYC,SMAD7,SNAI1	460 (17)
MYOC		other		-0.104	2.39e-07	ANXA1,CHRDL1,CHRM3,DAB2,DAG1,EBF3,EIF2AK3,FN1,FSCN1,IGFBP5,JDP2,KCNJ2,LAMA2,LAMB1,MFAP2,PGR,PLXNC1,PTGER4,S100B,SFRP1,SPP1,STC1,STC2,UPP1	676 (17)
captopril		chemical drug	Activated	2.197	2.41e-07	ACE,ANXA1,ASNS,BGN,BIRC5,EPHX2,FBLIM1,IGFBP6,IL6,LAMC2,LCN2,LGALS3,LTBP2,MRC1,POSTN,PTGS2,S100A10,SPP1,THBS4,TIMP1,TSPAN8,UPP1	678 (22)
MTPN	-0.145	transcription regulator	Activated	2.009	2.43e-07	ANXA1,APOD,BCL2,Calm1 (includes others),CASQ1,Ccl2,CCNB1,CCNB2,CDK1,COL1A1,COL1A2,Ctla2a/Ctla2b,FBLN1,FN1,H6PD,IL6,MIF,Mt1,MYC,PLAT,S100A10,S100A6,SPP1	534 (10)
CHADL	0.233	other		-1.941	2.43e-07	CADM1,Ccl2,CDKN1A,CSPG4,FAM107A,IGFBP3,IL6,KLF2,MN1,NTRK3,PTH1R,SMPD3,STEAP4
PD 123319		chemical drug		0.209	2.43e-07	ANGPT2,Ccl2,COL1A1,FASN,KDR,NCF2,PTGS2,RET,SPP1,SPRY1,STK11,TIMP1,VEGFA	711 (22)
MET	0.564	kinase	Activated	2.981	2.46e-07	ARID5A,AURKA,AURKB,BCL2,Ccl7,CDK1,CDKN1A,DAB2,FGL2,FN1,HBEGF,HDC,IL6,INHBA,mir-24,MMP2,MYC,NOX4,PIM1,PLK1,PLK2,PTGS2,SNAI1,SPP1,TGFA,TSC22D1,VEGFA	709 (22)
NFkB (complex)		complex	Activated	2.469	2.56e-07	ABCB1,ADAMTS9,ADM,ADRA2A,AQP1,ATP2A2,B4GALT1,BATF,BCL2,BID,BIRC5,BMP2,C1R,Ccl2,CCL5,Ccl7,CCNB1,CCNB2,CD36,CD74,CDKN1A,CFB,COL1A2,CXCL3,CXCL6,Cyb5r3,DUSP2,DUSP5,EDNRB,EFNA1,EGFR,EPAS1,ERBB2,ETS1,FABP5,FN1,FST,G0S2,GADD45A,GAP43,HDAC9,HIP1,IL10RA,IL6,INSRR,KDR,LCN2,LTC4S,MAP3K8,MEOX1,MFHAS1,MMP2,MTSS1,MYC,NCAM1,NCF2,NFKBIE,NGF,OLR1,PLD1,PLK1,PLK2,PPARG,PRKACA,PTGS2,Retnla,RFTN1,RGS16,RSAD2,SERPINA3…	688 (15)
BMP2	1.181	growth factor		0.997	2.62e-07	ACTA2,ALPL,BCL2,BMP2,BMP2K,BMPR1A,CAMK4,CDKN1A,COL1A1,COL1A2,CREB3L1,EPHX2,ETS1,FABP4,FGFR1,FGFR2,FN1,FST,FZD1,HEY1,IFI16,IGFBP5,LRP5,MRAS,MYC,NOG,NTRK3,PCSK6,POSTN,PPARG,PTGS2,PTH1R,RET,SMAD1,SMAD6,SMAD7,SOST,SPP1,TIMP1,VCAN,VEGFA	516 (23)
SRC	-0.53	kinase		0.297	2.72e-07	CDK1,CDKN1A,COL1A2,CYP1A1,EGFR,ERBB2,FN1,FOSL1,GJA1,IGF1R,IL6,KLK3,KRT18,MMP2,MYC,PLAUR,PLK1,POSTN,PTGS2,PTH1R,SIRPA,SPP1,SYNPO,TFPI2,TNFRSF11A,TWIST1,VEGFA,VEGFC	688 (19)
Salmonella enterica serotype abortus equi lipopolysaccharide		chemical toxicant	Activated	2.412	2.78e-07	ADRB2,ARRDC4,ASNS,Ccl2,CCL5,CDK1,CFB,CXCL3,DUSP2,EREG,FJX1,FLT1,FOSL1,G0S2,GADD45A,HEY1,HS3ST3B1,IL6,INHBA,KCNJ2,MAP3K8,NR4A2,OSGIN1,PLAC8,PLD1,PTGS2,RAPGEF2,SAV1,SGPP2,SYNPO2,TFPI2,THBS1,TIFA,TMPO,TRAF1,TSLP	722 (18)
PDGFC	1.407	growth factor		-1.099	2.87e-07	ACTA2,COL1A2,FLT1,KDR,MYC,PDGFRA,PDGFRB,TEK,TIMP1,TIMP2,VEGFA	617 (19)
L-methionine		chemical - endogenous mammalian		0.108	2.87e-07	ACTA2,AURKB,BRCA1,BUB1,CCNB1,CCNB2,CDCA8,CDK1,IFI16,MGMT,NUSAP1,PLAT,PRC1,RHOB,SMAD7,SPP1,TOP2A,TYMS	605 (17)
LDL		complex	Activated	3.341	2.92e-07	ATP2A2,AXL,BCL2,BMP2,CBS/CBSL,Ccl2,CCL5,CD36,CD68,CDH5,CDK1,CDKN1A,CXCL3,CXCL6,DUSP2,ECE1,EDNRB,ERBB2,FABP4,G0S2,GJA5,GNAI1,HAS3,HYOU1,IGF1R,IGFBP3,IL10RA,IL17RA,IL6,INSIG1,ITGB3,LRP1,MKI67,MMP16,MMP2,NME1,NR1H3,NR4A2,OLR1,PANX1,PLAT,PPARG,PTGS2,RANBP1,RCAN1,SMAD3,SPHK1,VEGFA	662 (18)
STAT1	0.21	transcription regulator	Activated	3.201	2.95e-07	ABCB9,ANGPT2,AXL,BIRC5,BTNL9,C1QTNF7,C1R,Ccl2,CCL5,CDKN1A,CFB,CH25H,CXCL3,DUOX2,EGLN3,FGL2,FURIN,HAPLN3,HEY1,HTRA1,IFI16,IFI30,IFITM3,IGF1R,IL31RA,IL6,IRF5,IRF8,KCTD12,LCN2,LY96,MYC,NEURL3,NOX4,PCDH17,PDGFC,PDGFRB,PHACTR1,PIM1,PPARG,PTGS2,PTN,RARB,Retnla,RSAD2,RTP4,S100A10,SERPINA3,Serpina3g (includes others),SLAMF8,SLFN12L,Slfn2,SMAD3,SMAD7,SMAGP,SORT1,ULK1,USP18,XAF1,ZBP1,ZNF652	649 (17)
indomethacin		chemical drug	Activated	2.18	3.08e-07	ADAMTS5,ANGPT2,ANXA1,ASNS,BCL2,BIRC5,Ccl2,CCNB1,CDKN1A,CSF2RB,DYNLL1,FABP4,FASN,FBLIM1,FLT1,FXYD5,IFITM3,IL6,INSR,LAMC2,LCN2,LGALS3,LPL,MMP2,MRC1,MYC,PCNA,PGR,PIM1,PLAUR,PPARG,PTGER4,PTGS2,RCN1,RFTN1,S100A10,SPP1,TEK,TES,TFPI2,TIMP1,TSPAN8,UCP2,UPP1,VCAN,VEGFA	676 (20)
methotrexate		chemical drug	Inhibited	-2.018	3.08e-07	ADORA2A,AK4,ALOX12,ANKH,ASS1,C1R,CCL21,CCL5,CDKN1A,CFB,CFI,CLEC11A,COL4A1,CYCS,DHFR,ENTPD2,EPAS1,FADS1,FASN,FKBP3,GAP43,GPAM,HBA1/HBA2,HMGCS2,HSD11B1,IGFBP3,IGFBP5,IL6,INSR,ITIH4,LBP,LPL,LRP1,LY96,MAPKAPK2,Mt1,MYC,NQO1,NR4A2,PTGS2,SCD,SLC27A2,SPP1,THBS1,TYMS,WWOX	679 (16)
PRL		cytokine		-1.371	3.11e-07	ABCG2,ATP2A2,BCL2,BOK,CCNB1,CDKN1A,CLDN5,COL1A1,COL1A2,COL3A1,COL5A1,CPD,DES,EGFR,ERBB2,FLT4,FN1,HIPK3,IGF2,IGFBP3,IGFBP5,IL6,LYVE1,Marcks,Meg3,MICOS10-NBL1/NBL1,MME,MYC,PAQR7,PAQR8,PC,PCNA,PCOLCE,PDGFRA,PDLIM4,PDPN,PIM1,PLAT,PROX1,PTPN18,RASD1,RSAD2,SERPINA3,SFRP2,SPP1,TIMP1,TIMP2,Tmsb4x (includes others),USP18,XAF1,XDH	707 (22)
HMGA1	0.834	transcription regulator		-0.862	3.35e-07	ACTA2,ALPL,ARL4A,BRCA1,COL1A1,COL1A2,COL4A1,CSK,DAB2,FSTL1,GNA15,Hbb-b1,HS3ST1,IGFBP3,IGFBP7,IL6,INSIG1,INSR,KLF2,LAMB1,Ly6a (includes others),MAPK8IP1,MAPKAPK2,MYC,PPARG,PSEN2,PTGS2,PTH1R,RHOB,SLC27A2,SOD3,SOX4,TWIST1	668 (23)
KDM5B	-0.291	transcription regulator	Inhibited	-2.946	3.85e-07	AURKA,BRCA1,CCNB1,CDCA3,CDK1,DLGAP5,ECT2,ERBB2,FABP5,FBXO5,FGFR2,FHL1,FJX1,FST,GADD45A,GATA4,HMMR,INSIG1,KIF2C,MCAM,NCAPH,NDC80,NMB,PBK,PDE3B,PGR,REEP1,SMOX,SNRPD1,TOP2A,TTK	530 (12)
KLF6	0.327	transcription regulator		0.427	3.91e-07	Ccl2,CDKN1A,COL1A1,CYP1A1,DLK1,IGF1R,IL6,MKI67,MRC1,MYC,NCOA1,PCNA,PPARG,PTCH1,PTGS2,RARB,RARG,Retnla,TFPI2,VAV3,VEGFA	668 (19)
SP3	-0.153	transcription regulator		-0.392	4.19e-07	ABCB1,ACTA2,AKAP12,ALOX12,ANGPT2,APBA1,ASNS,BIRC5,CBS/CBSL,Ccl2,CDKN1A,Ces2c,COL1A1,COL1A2,CYP7B1,DHFR,EGFR,EREG,FLT1,FOSL1,HPSE,IGF1R,IGF2,IGFBP3,ITGA2,ITGB5,KDR,LPL,MMP2,MYH11,NCF2,NPTXR,PGR,PLAUR,PREX1,PTGS2,RECK,SLC19A1,TIMP1,TIMP2,TNC,VEGFA	786 (21)
cyclosporin A		biologic drug		-0.113	4.36e-07	ABLIM1,ACPP,ACTA2,ADORA2A,ANXA1,APOD,ASNS,ATP1A1,ATP8A2,BATF,BCL2,BGN,BMP2,CCL5,CD1D,CD68,CDKN1A,COL1A1,EDNRB,EGFR,EIF2AK3,FASN,FBLIM1,FLNA,FLT1,FN1,FST,FXYD5,GJA1,HELLS,IL31RA,IL6,KCNK3,KDR,LAMC2,LCN2,LGALS3,LYN,LYVE1,MAF,MIF,MMP2,MRC1,MYC,MYH10,MYH11,MYOCD,NME1,NRCAM,PAM,PARD3,PCNA,PDE3B,PERP,POSTN,PTGS2,PTHLH,RCAN1,RFTN1,RPS6KA2,S100A10,SCD,SPHK1,SPP1,SYT7,TIMP1,TLE3,TSPAN8,UPP1,VEGFA,XAF1	564 (19)
GATA1		transcription regulator		-1.012	4.38e-07	ABCA2,ACTN1,AFF3,ALOX12,ANGPT2,ANK1,AQP1,BCL2,BIRC5,BLVRB,BMP6,CCL5,CD36,CPD,EPOR,ETS1,FHL1,GP1BA,HBA1/HBA2,Hbb-b1,Hbb-b2,HDAC11,HPSE,IRF8,ITGA6,ITGB3,JDP2,KDM4A,KDR,LEPR,LYL1,Meis1,MYC,NFIL3,NHP2,NR4A2,NRARP,PAPPA2,PCNA,PIM1,PLXNA1,POLA2,PRG2,RANBP1,SLC19A1,ST3GAL6,TAC3,TCF4,TEK,TOP2A,ZBTB42,ZNF366	526 (17)
WNT1		cytokine		-0.142	4.45e-07	ACTA2,BIRC5,CCNB1,CDKN1A,COL3A1,DHFR,DKK2,EIF4EBP1,ENPP2,FN1,FZD2,GADD45G,GAS1,IGF1R,IGF2,ISLR,Meis1,MRAS,MYC,NOTCH4,PPARG,PTGS2,RARB,RARG,RELN,SEMA3C,SPP1,Tnfsf9,TWIST1,VEGFC	744 (23)
sphingosine-1-phosphate		chemical - endogenous mammalian		-0.453	4.7e-07	ACTA2,Ccl2,CCL5,CD36,COL3A1,EGFR,ENPP2,ETS1,FN1,GAP43,GATA6,HSD11B1,IL6,KCNH2,KDR,NRP1,NRP2,PTGS2,S1PR2,S1PR3,SPHK1,THBS1,TIMP1,VEGFC	574 (18)
Ro31-8220		chemical - kinase inhibitor		-0.504	4.81e-07	BCL2,CDKN1A,COL1A1,COL1A2,FABP4,FN1,FSTL3,IL6,KLK3,MMP2,Mt1,PLD1,PRKCQ,PTGS2,TRAF1,TWIST1	463 (17)
acyclic retinoid		chemical drug		1.291	4.92e-07	CDKN1A,COL1A2,FLT1,KDR,MYC,PDGFRA,PDGFRB,RARB,TEK,TIMP2	698 (24)
tacrolimus		chemical drug		-0.696	5e-07	ABLIM1,APOD,BATF,BCL2,CAPG,Ccl2,CCL5,CD36,CD74,CHN2,COL1A1,COL3A1,DACH1,DPYSL3,ETV1,FABP4,FLNA,FN1,GAP43,GPRC5B,HELLS,IL33,KCNK3,MAF,MARCKSL1,MYC,MYH10,MYH11,NFATC4,NME1,NPTX1,NRP1,PDE3B,PDLIM4,PTGS2,PTPRJ,RCN1,SDC3,SLC12A5,SLIT2,SMAD7,SPP1,TLE3,TMEM100,TNC,VEGFC	505 (19)
OGT	0.11	enzyme		-0.204	5.06e-07	ATP2A2,BIRC5,CDKN1A,CHST8,CLCA2,DNM3,DTNA,DUOXA1,GAP43,HMGA1,INSR,KRT18,MMP2,MYC,NDUFA8,NDUFC2,NEK2,PLK1,RGS16,THY1,TNC,WIF1	667 (21)
LOX	-1.194	enzyme		-0.333	5.29e-07	BCL2,COL3A1,ELN,IGF1R,LRP5,MYC,PCNA,PDGFRA,PDGFRB,SNAI1,TEK	632 (22)
CLEC4G		other		0	5.32e-07	BMP2,EBF1,EGFL8,FZD4,GAS1,HBEGF,IGF2,IL6,NOTCH4,NRARP,PDGFD,Retnla,SFRP4,THBS4,VEGFA,VEGFC,WNT2,WNT9B
MAPK14	-0.52	kinase		0.588	5.36e-07	ACTA2,BCL2,BMP2,Ccl2,CCL5,Ccl7,CCNB1,COL1A1,DAB2,EFEMP1,EFNA1,EGFR,EREG,FASN,FLT1,FN1,GADD45A,GJA1,Hbb-b1,IGF2,IL6,KDR,MAPK11,MYH11,NRP1,PLA2G5,PLAUR,PSMD10,PTGS2,SLFN12L,Slfn2,STIM1,TIMP1,TIMP2,TOP2A,VEGFA,VEGFC,WIF1	631 (18)
staurosporine		chemical - kinase inhibitor		1.025	5.82e-07	ABCB1,BCL2,Ccl6,CDKN1A,COL1A1,COL1A2,CYP1A1,EGFR,FOSL1,HDC,IGF1R,IGF2,IGFBP5,IL6,ITGB3,MME,MYC,NQO1,PIM1,PLAT,PTGS2,PTH1R,RCAN1,SERPINA3,SMAD3,TK1,USP12,VEGFA	771 (18)
FGF1	-0.705	growth factor		1.257	6.11e-07	Ccl2,CD68,CDKN1A,CPXM1,FGFR1,Fndc1,FZD1,FZD2,FZD7,FZD8,GADD45G,IL6,IRS1,LRRC17,MKI67,MYC,NQO1,NR1H3,NR4A2,POSTN,PTGS2,SERPINB1,SLC7A2,SPP1,TCF4,TEAD4,THBS1,VEGFA,VEGFC	632 (18)
PPARA		ligand-dependent nuclear receptor		0.941	6.11e-07	ACOT2,ANGPTL4,ASNS,ASS1,AURKA,BCL2,C1R,CA9,Ccl2,CCNB1,CD36,CDK1,CDKN1A,CFI,CYCS,CYP1A1,CYP7B1,DBI,DIO2,DYNLL1,ELOVL6,FABP4,FABP5,FADS1,FADS2,FASN,G0S2,GPAM,Gsta4,HMGCS2,IFITM3,IGFBP3,IGFBP5,IGFBP6,IL6,INSIG1,KIF2C,KIF4A,LPL,ME2,MGMT,MKI67,MYC,NCF2,NR1H3,PAQR7,PBLD,PC,PCNA,PLA2G7,PLIN4,PLK1,POR,PPARG,PRC1,PTGS2,RBP7,SCD,SELENBP1,SLC27A2,SLC2A4,SMC2,SMC4,SORD,SQLE,STBD1,STIM1,TMTC2,TOP2A,UCP2,VEGFA	528 (18)
MEF2C	0.352	transcription regulator		-0.524	6.3e-07	ACTC1,ATP2A2,Ccl2,Ccl6,CDKN1A,COL1A1,COL1A2,COL3A1,CXCL6,DES,FRZB,GATA4,GJA1,GJA5,HDAC9,HSPB7,IL6,KCNJ2,KLF2,MYOM1,NFATC2,POSTN,PTGS2,PTH1R,PTPRB,S100A4,SCN5A,SFRP2,SLC2A4,SOST	428 (16)
2-(4-amino-1-isopropyl-1H-pyrazolo[3,4-d]pyrimidin-3-yl)-1H-indol-5-ol		chemical reagent	Inhibited	-3.144	6.34e-07	ASF1B,AURKA,AURKB,BIRC5,C1R,CCNB1,CDCA2,CXCL6,EXO1,FOSL1,GJA1,GREM2,HIST2H2BF,KPNA2,NCAPG,SERPINB1,SMC2,TK1,TNFAIP8L1,TOP2A	523 (7)
spironolactone		chemical drug		-0.051	6.42e-07	ACE,BCL2,Ccl2,CDKN1A,COL1A1,COL1A2,COL3A1,DES,EDNRB,FASN,FN1,IL6,KCNMA1,KCNMB1,LOX,PGF,PPARG,PTGS2,SCD,SLCO2B1,TIMP2,VEGFA	699 (22)
RNA polymerase II		complex			6.67e-07	ACTC1,ALPL,ARID5A,ASNS,ATP6V0A1,BCL2,BRCA1,CAP2,CCL5,CCNB1,CCNB2,CDKN1A,COL1A2,CSDC2,CYP1A1,CYP1B1,DCTPP1,DHFR,DLGAP5,ERBB2,EXOSC8,FABP4,FLT1,FOSL1,FOXC1,FOXC2,GADD45A,GATA4,Hbb-b1,Hbb-b2,IGFBP3,IL6,KPNA2,Meis1,MKRN3,MMP2,MYC,OSGIN1,PCNA,PPARG,PTGS2,RAD51AP1,RARB,RPL12,SLC27A2,SPP1,THBS2,Tmsb4x (includes others),TOP2A	557 (17)
hexachlorobenzene		chemical toxicant	Activated	2.864	7.16e-07	ANXA1,ASNS,FBLIM1,FXYD5,LAMC2,LCN2,LGALS3,MMP2,MRC1,MYC,RCN1,RFTN1,S100A10,SPP1,TES,TIMP1,TSPAN8,UPP1	500 (18)
hydrogen peroxide		chemical - endogenous mammalian		1.105	7.27e-07	ABCB1,ACE,ACTA2,AEN,AURKA,BCL2,BIRC5,BRCA1,BUB1,C1QTNF9B,Ccl2,CCNB1,CD68,CDH13,CDK1,CDKN1A,COL1A1,COL1A2,CXCL3,CXCL6,CYCS,CYP1A1,DUSP2,DUSP8,EGFR,ELN,ENPP2,EPAS1,ETS1,FASN,FN1,FOSL1,FZD2,GADD45A,HBEGF,HDC,HELLS,HMGCS2,IGF1R,IL6,INSIG1,IRS1,ITGA2,ITGA6,ITGB3,KDR,KLF2,LCN2,MCAM,MIF,MMP2,MYC,NDC80,NFIL3,NGF,NQO1,OSGIN1,PDGFRA,PGF,PIM1,PLAUR,PPARG,PTGER4,PTGS2,PTN,RASSF8,RCN1,SFRP2,SNAI1,SPP1,SQLE,ST…	619 (17)
mir-223		microRNA		0.593	7.47e-07	ABCB1,ACTA2,ALCAM,BST1,C15orf48,CD36,EYA1,FGL2,FNIP2,GASK1B,Hbb-b1,IFI16,Ifitm6,IGF1R,IL6,LPL,Ly6a (includes others),LY96,Mt2,MYO1D,NQO1,POSTN,RAB38,RIPK3,S100A6,Serpina3g (includes others),SLC16A7,SLC2A4,STMN1,TGFBI	593 (19)
E. coli B4 lipopolysaccharide		chemical toxicant	Activated	4.14	7.49e-07	1810032O08Rik,5430416N02Rik,ADAMTS5,ADCY7,ANXA1,AQP1,BAZ1A,BCL2,BID,BIK,C2orf40,Ccl2,CCL5,CENPA,CXCL3,CXCL6,CYTH4,ETNK1,FBLIM1,FGL2,FIBIN,GADD45G,GNA14,GNAI1,IFI16,IFITM3,Ifitm6,IL33,IL6,KIF20B,KLHL21,Klrb1f,LCN2,LCP1,Ly6a (includes others),MRC1,PDCD1,PDE3A,PIM1,PLAUR,PTGS2,RAB20,RSAD2,RTP4,SAMSN1,Slfn2,STC2,TRAF5,USP18,ZBP1	690 (18)
S100A9		other	Activated	2.152	8.17e-07	ADAMTS4,ADAMTS5,AKAP12,ALDH1A1,ALPL,Ccl2,Ccl7,CSF2RB,CXCL3,EFNA1,ELN,ENPP2,ENTPD2,FBLIM1,FOSL1,FURIN,HEY2,IL33,IL6,KCNMA1,KLF15,LTBP1,MGMT,MMP2,NTRK3,OLR1,PDGFC,PER1,POSTN,RAB20,ROBO2,SCUBE1,UNC5A,USP18,VCAN	769 (22)
ADIPOQ		other		0.483	8.17e-07	BCL2,BIRC5,BMP2,Ccl2,CCL5,CD36,CDKN1A,CMKLR1,COL3A1,CXCL3,DLK1,FABP4,FASN,FN1,HBEGF,HMGCS2,IL6,LEPR,LPL,MMP2,NCF2,NOX4,NR1H3,PCNA,PPARG,PRKAA2,PTGS2,SCD,SLC27A2,SLC2A4,STK11,TIMP1,TRAF1,UCP2,VEGFC	510 (22)
EBF1	1.342	transcription regulator		-1.211	8.85e-07	ADCY3,CCL5,COL1A1,EBF1,EIF4EBP1,FASN,IL6,INPPL1,INSR,IRS1,Ly6a (includes others),MKNK2,NFIL3,PDE3B,PIK3R2,POSTN,PPARG,PPP1R3C,PPP1R3D,PRKAA2,PRKACA,PRKAR1B,PRKAR2A,PRKAR2B,RHOQ,RPTOR,SCD,SFRP2,SLC2A4,VPREB1	773 (25)
hyaluronic acid		chemical - endogenous mammalian		0.91	9.58e-07	ABCB1,BCL2,BIRC5,Ccl2,CCL5,COL6A2,CXCL3,ERBB2,FN1,FST,HMMR,HOXD10,IL6,IRF5,LY96,MMP2,NCF2,NOG,NR4A2,PCNA,PPARG,PTGS2,PTHLH,SPHK1,SPP1,TIMP1,TIMP2	505 (18)
AREG		growth factor	Activated	2.276	9.63e-07	AURKB,BCL2,BIRC5,CCNB1,CCNB2,CDC20,CDCA8,CENPA,CENPF,EGFR,EREG,HIST1H2BD,HIST1H2BG,IL6,IQGAP3,MKI67,NIPAL4,NPPC,PLK1,PRC1,PTGS2,RRM2,TOP2A	718 (19)
POSTN	-1.028	other		-1.039	9.74e-07	ACTA2,ADAMTS4,Ccl2,CLCA1,DLK1,EGFR,HEY1,HEY2,LOX,PTN,SOST,SPP1,TSLP	536 (12)
curcumin		chemical drug		0.271	9.78e-07	A4GALT,ABCB1,ACTA2,ADAMTS4,ADAMTS5,AQP1,ATP1B2,AXIN1,AXL,BCL2,BIRC5,Ccl2,CCL5,CCNB1,CD36,CDK1,CDKN1A,COL1A1,COL1A2,CXCL3,CYP1A1,EGFR,ENTPD5,ERBB2,ETS1,FOSL1,IGFBP5,IL6,IRS1,ITGA6,KCNB1,LPL,MARCKSL1,MIF,MMP2,MST1R,MYC,NCAM1,NEO1,NQO1,OLR1,PDE3B,PDGFRB,PGF,PIM1,PPARG,PTGIS,PTGS2,PTN,SERPINB1,SLC2A4,SMAD7,TBXA2R,TNFRSF11A,TOP2A,TRAF1,TSLP,UCP2,VEGFA	681 (15)
TET2	0.028	enzyme		-0.311	1.03e-06	4930412C18Rik,AFF3,Ccl2,Ccl7,CXCL6,FAM129B,FGL2,FN1,FOXC1,HS6ST1,IFI16,Ifitm1,IFITM3,IGF1R,IL6,ITGA2,KLF2,LHFPL6,MTSS1,PDGFRB,RNF144A,RPS6KA2,RSAD2,SGPP1,SLC16A12,SLC6A4,SORL1,TGFA,TIMP1	561 (12)
S100A8		other		1.908	1.04e-06	ADAMTS4,ADAMTS5,AKAP12,ALDH1A1,ALPL,BCL2,Ccl2,Ccl7,CSF2RB,CXCL3,EFNA1,ELN,ENPP2,ENTPD2,FBLIM1,FOSL1,FURIN,HEY2,IL33,IL6,KCNMA1,KLF15,LTBP1,MGMT,MMP2,NTRK3,OLR1,PDGFC,PER1,POSTN,RAB20,ROBO2,SCUBE1,UNC5A,USP18,VCAN	506 (15)
ritonavir		chemical drug		0.637	1.05e-06	ABCB1,ARHGEF19,ATP2B1,BIRC5,BMP1,CD36,CEP70,CTNNAL1,CYP1A1,ECT2,EPHA1,FABP4,FADS2,FGGY,GRAP,HMMR,IL6,ME1,MME,MYC,NCAPH,NEIL3,PPARG,RACGAP1,RGS10,SCD,SQLE,TGIF2,USP18,VEGFA,WNT5B	732 (26)
PRAME		other		-1.709	1.06e-06	BCL2,CDKN1A,CYP26B1,EIF2AK3,IL13RA1,RARB,S100A4,TOP2A	267 (7)
SMARCB1	0.311	transcription regulator		-1.103	1.26e-06	ABCB1,AURKA,CDK1,CDKN1A,CENPA,CENPE,COL1A1,COL1A2,DACH1,DHFR,ERBB2,FABP4,FZD7,GADD45A,GJA1,HBEGF,HEY1,IFI16,KIF23,KLHL4,LBP,MYC,MYOM1,NEO1,PC,PGLYRP1,PLCL1,POSTN,PPARG,PPP1R3C,PTN,RAB5B,RAD51AP1,SGCG,SMC4	751 (26)
emodin		chemical drug		-0.278	1.26e-06	ABCB1,BCL2,BIRC5,Ccl2,CDKN1A,CLDN5,CXCL3,CYP1A1,CYP1B1,ERBB2,FN1,IL6,IRF5,LPL,MKI67,MMP2,MRC1,TWIST1	450 (17)
CFTR		ion channel		-0.632	1.27e-06	AQP1,ASNS,CAPG,CCL5,CFI,CXCL3,EPHX2,FADS1,FADS2,HPGD,LRG1,OXCT1,PGLYRP1,PLA2G5,POR,PTGS2,SCD,SLC27A2,SLFN12L,Slfn2,SQLE,Tmsb4x (includes others)	560 (10)
TMEM173	0.527	other	Activated	3.667	1.31e-06	C15orf48,CCL5,GAS7,HDC,HOPX,IFI16,Ifi27l2a/Ifi27l2b,IFITM3,IL33,IL6,LCN2,RGS16,RSAD2,Serpina3g (includes others),UPP1,USP18	656 (17)
Notch		group		0.189	1.33e-06	ACTA2,ADAM12,ADM,BIRC5,CDCA7,CDKN1A,CNN1,FABP4,FLT4,HEY1,HEY2,HEYL,IL6,MMP2,MYC,PROX1,SMAD1,SMAD3,SMAD6,VEGFA,ZEB2	574 (19)
NEUROG1		transcription regulator		0	1.34e-06	AMIGO2,ASS1,COL3A1,DSP,EPAS1,FN1,GASK1B,IL6,INHBA,ITGB3,LCP1,MEST,MFAP4,NEO1,NOG,PLK2,S100A4,THBS1,TMTC2	278 (7)
lysophosphatidylcholine		chemical - other		1.066	1.35e-06	Ccl2,CCL5,CD36,CD74,FABP5,FADS2,FASN,GJA1,HBEGF,IL6,INSIG1,LPL,LRP1,NOD2,OLR1,PLAUR,PPARG,RGS2,SCD,SQLE	581 (19)
GW501516		chemical drug		-0.852	1.48e-06	ANGPTL4,APOD,BCL2,CCL21,CDKN1A,COL5A1,COL6A1,Ctla2a/Ctla2b,CXCL6,FASN,FGFR1,FLT1,IGFBP3,IGFBP5,IGFBP6,IL6,KLK11,LPL,PLAT,SCD,SNCG,Sprr2a1/Sprr2a2,THBS1,UCP2,VEGFA	468 (18)
HEY2	-0.91	transcription regulator		1.602	1.48e-06	ACTA2,ALPL,BMP2,CNN1,GATA4,GATA6,GJA5,IL6,KCNJ2,MYH11,NR2F2,PROX1,SCN5A	250 (10)
PRKAG3		other			1.52e-06	ANGPTL4,ANXA8/ANXA8L1,AQP1,ASPH,Cbr2,CD36,CDH5,FGFR1,FXYD6,GADD45G,GJA1,HFE,IFI30,IGFBP5,ITGA6,ITIH5,KLF2,METTL7A,NEO1,NRIP1,OXCT1,PAM,PEG3,RPL12,SLC4A3,SLC7A2,SNCG,SORD,THRSP,TMEM100,TMEM37,TPPP3,TSPAN8,ZEB2
DLL4	0.408	other		-0.443	1.52e-06	ACTA2,DES,DTX1,EFNB2,FLT1,HEY1,HEY2,KDR,LYVE1,MAF,NR2F2,NRARP,RGS5,UNC5B	257 (12)
4-hydroxytamoxifen		chemical drug		0.333	1.57e-06	ABCB1,ACTC1,BCL2,CDCA7,CDKN1A,COL16A1,CYP1A1,CYP1B1,DUSP5,DYNLL1,EFEMP1,EGFR,EPHA1,EPOR,FABP4,FGFR1,IGF1R,IGFBP3,IL6,ITPRIP,MICOS10-NBL1/NBL1,MKI67,MYC,NCOA1,NCOR2,NR4A2,PGR,PTGER4,RAI2,RASD1,RGS16,RHOBTB2,SPHK1,TGFA,THRB,TUFT1	721 (18)
RRP1B	0.069	transcription regulator			1.58e-06	ADCY7,AURKA,BIRC5,BRCA1,CCNB2,CDC20,CDK1,CDKN1A,DBF4,DHFR,EXO1,GADD45A,HDAC11,ITGB5,MRAS,NCOA1,PCNA,PDGFC,PERP,PLK1,RARG,RHOQ,SMAD6,SPP1,TOP2A,VEGFC
HEY1	1.077	transcription regulator		0.551	1.59e-06	ACTA2,BMP2,CDKN1A,CNN1,GATA4,GATA6,KDR,MMP2,MYH11,NR2F2,PROX1	637 (19)
CBX5	-0.283	transcription regulator		-1.4	1.65e-06	ABCB1,AGR2,ALDH3A1,BIRC5,C15orf48,CD68,CDKN1A,CYP1B1,FKBP14,FOXQ1,GASK1B,GCHFR,HOXB6,ITGA7,KLK3,KRT80,LCN2,OLR1,PODXL2,PPARG,PRSS23,SELENBP1,SERP2,SERPINA3,TGFBI,TSPAN13,TSPAN8
ETV5	0.099	transcription regulator		-0.316	1.65e-06	AKAP5,ALCAM,CHSY1,COL4A3,DPYSL2,EMP2,FASN,FN1,FXYD5,HOPX,KRT80,LCN2,LGALS3,MAF,MMP2,NCAM2,NRCAM,PKP2,Retnla,S100A6,SCD,SPP1,TWIST1,VEGFA	298 (7)
BMP6	-1.418	growth factor		1.165	1.65e-06	ACTA2,ADAMTS5,ARHGAP18,CDKN1A,CYP1B1,FOSL1,HBEGF,IL6,INHBA,MATN2,Meis1,MYH10,NOG,PCOLCE2,PCSK6,PTGS2,SAP30,SEMA3A,SMAD7,SNAI1,SORD,TIMP1,VEGFA,WNT2	638 (22)
diphenyleneiodonium		chemical reagent		0.797	1.66e-06	ACTA2,BMP2,Ccl2,COL1A1,CXCL3,DUSP2,EGFR,EPAS1,FN1,IGF1R,IL6,NOX4,PDE5A,PTGS2,THBS2,TIMP1,UCP2,VEGFA	611 (20)
APOE	0.212	transporter	Inhibited	-2.354	1.8e-06	ABCA2,ACTA2,ADAMTS5,ALOX12,ANK3,APOD,BGN,Ccl2,CCL5,CD36,CD68,COL1A1,CREB3L1,CXCL3,Cyb5r3,DAGLA,DIP2A,GAS7,HMMR,HSD11B1,HSPG2,IGF1R,IGFBP6,IL10RA,IL6,INSR,KCNAB1,LCN2,LPL,LRP1,LTBP1,LTBP2,MMP2,MYO1B,MYOCD,NCF2,NOX4,NPNT,NR1H3,PC,PCDH9,PPARG,PRKCQ,PTGS2,RELN,SEMA6B,SERPINA3,SMAD1,SPP1,THY1,TIFA,TIMP1,UCP2,WNT2	764 (20)
FOXA2		transcription regulator		-0.332	1.8e-06	ABCB1,ACTA2,ACTC1,ACTG2,AGR2,AMY2B,CHRD,CLCA1,CNN1,CTHRC1,DLK1,FABP5,GATA4,GFRA4,GPRC5C,GRIN3A,HMGCS2,HPGD,IGFBP5,IL33,IL6,LPL,LTC4S,Mt1,MYH11,MYOCD,NFKBIE,NR4A2,PIM1,PPARG,RARB,RARG,Retnla,SCD,SERPINA1,SLC2A4,SMOC1,SNAI1,SOD3,UCP2,UST	698 (25)
TGFBR1	-0.643	kinase		-1.478	1.97e-06	ACTA2,BGN,BIRC5,CDKN1A,CLDN5,COL1A1,COL1A2,FBLN5,FMOD,FN1,FURIN,GAS1,HEY1,ITGB5,LTBP1,MST1R,NFATC2,SMAD7,SNAI1,TGFBI,TWIST1,VEGFC	701 (17)
WNT5A	-0.433	cytokine	Inhibited	-2.824	2e-06	BCL2,BMP6,CAMK4,COL1A1,CXCL6,DAB2,DOK2,EGFR,ENPP2,ERBB2,EREG,FLNA,FLT1,FN1,IL6,IRF8,LCP1,Ly6a (includes others),MYC,PGF,PTGS2,RET,ROR2,SNAI1,SPP1,STC1,TNFRSF11A,VEGFA	690 (24)
anisomycin		chemical - endogenous non-mammalian		-0.4	2.03e-06	ABCB1,ABCG2,BCL2,CDKN1A,CYP1A1,DUSP8,GJA1,IL6,IRS1,NTRK2,PLAUR,POSTN,RGS7,SKIL,SPP1,TCF7L2,VEGFA	526 (20)
TREM1		transmembrane receptor		1.571	2.04e-06	ADRB2,ARRDC4,ASNS,ASPH,BCL2,Ccl2,CCL5,CDK1,CFB,CKS2,CXCL3,EIF2AK3,FOSL1,HBEGF,HS3ST3B1,HSD3B7,HTRA4,IL6,INHBA,KCNJ2,LPL,MAP3K8,NOD2,NR4A2,OSGIN1,PGLYRP1,PLAC8,PLD1,PPARG,PTGS2,RCAN1,RGS16,S1PR3,SPP1,TFPI2,THBS1,TIFA,TMPO	544 (18)
MITF		transcription regulator	Activated	2.247	2.13e-06	ALCAM,APOLD1,ATP1A1,AURKB,BCL2,BRCA1,CCNB1,CDCA3,CDCA8,CENPF,CENPM,CEP55,COL1A1,ECT2,EDNRB,FMOD,FN1,GNPTAB,GPM6B,GPR137B,HAPLN1,HPGD,INPP4B,KIF4A,LGALS3,NPM3,PHACTR1,PLK1,PSEN2,PSMC3IP,RHOQ,SEMA3C,SNAI1,SORT1,SOX13,SOX5,SPC24,SPC25,ST3GAL6,TACC3,TPX2,UBE2C,UPP1	426 (7)
ATP7B		transporter		-1.604	2.19e-06	CDC20,CENPQ,ELOVL6,FABP5,FASN,Mt1,Mt2,RAD51,SHCBP1,SMC2,SMC4,SQLE,THRSP,TRIP13
discodermolide		chemical drug			2.19e-06	BRCA1,CCNB1,CCNB2,CDC20,CDK1,CDKN1A,EIF4EBP1,GADD45A,KIF23,PLK1,PRC1,RAD51,SMC2,TOP2A	468 (7)
silibinin		chemical drug		-0.337	2.22e-06	BIRC5,CCNB1,CDK1,CDKN1A,FLT1,FN1,IGF1R,IGFBP3,IL6,KLK3,KRT18,MMP2,MYC,PCNA,PLAUR,PTGS2,SNAI1,TIMP2,VEGFA	639 (20)
NFAT5	0.109	transcription regulator		0.877	2.22e-06	AQP1,ATP2A2,C1QTNF1,C1QTNF5,Ccl2,COL1A1,COL1A2,CXCL3,EREG,IGFBP7,IL6,LCN2,NOX4,PLAT,PRSS35,PTGIS,RRM2,S100A4,SLC6A6,SLC7A2,SPP1,TRAF1,VEGFA	692 (20)
paclitaxel		chemical drug		1.883	2.32e-06	ABCA2,ABCB1,ABCG2,ACTA2,BCL2,BIRC5,CDA,CDC20,CDKN1A,CELSR2,CXCL6,CYP1A1,CYP1B1,DUSP5,ENPP2,EREG,ETV1,FLNA,FMO3,FOSL1,G0S2,GRINA,HBEGF,HPSE,IGFBP3,IL6,ITGA6,ITGB5,KLK3,LCP1,MKI67,MYC,MYO7A,PCNA,PLAUR,PRELP,PTGS2,RFTN1,SLC12A2,SMAGP,SPRY1,STC1,STMN1,TFPI2,TGFA,THBS1,TMEM184B,TRAF1,TSC22D1,TWIST1,UTP14C	671 (18)
epigallocatechin-gallate		chemical drug		-0.539	2.35e-06	ADORA2A,ANGPT2,AXIN1,AXL,BCL2,BIRC5,CCL5,Ccl7,CDKN1A,CLDN5,CXCL3,DAPK2,EGFR,ERBB2,FN1,FOSL1,GADD45A,GJA1,IGF1R,IL6,ITGB3,KDR,KLK3,MKI67,MMP2,MYC,NR4A2,PCNA,PDGFRB,PGR,PRG2,PTGS2,PTN,SFRP1,SLC16A1,SLC2A4,SNAI1,TIMP1,TIMP2,TRAF1,VEGFA,VEGFC	765 (21)
PI3K (complex)		complex		0.119	2.36e-06	ADAM12,ADRB2,BCL2,BIRC5,Ccl2,CCNB1,CDKN1A,COL1A1,ETS1,FABP5,FBLN5,FN1,FOSL1,GAP43,GJA1,HAS3,HBEGF,IGF1R,IGF2,IL33,IL6,ITGA6,KDR,KLF2,LCN2,LTBP2,MCAM,MMP2,MRC1,MYC,NME1,NOX4,NQO1,NR4A2,PIM1,PLA2G5,POSTN,PRKAR2B,PRKCZ,PTGS2,RGS2,RHOB,SKIL,SNAI1,SNCG,SPP1,STMN1,THBS1,TNFRSF11A,VEGFA	754 (18)
Collagen Alpha1		group		0.02	2.54e-06	CDKN1A,COL1A1,EGFR,MMP2,PCNA,PLAUR,PTGS2,TIMP2	494 (20)
LAMA2	-1.917	other		-0.873	2.54e-06	ACTA2,CDH5,CLDN5,CSK,DES,LAMA2,LAMA4,PLVAP
streptozocin		chemical drug		1.683	2.63e-06	ABCB1,ABCG2,ADORA2A,ALPL,ANGPT2,ATP1A1,ATP1A2,ATP1B2,BCL2,CBS/CBSL,COL1A1,COL3A1,COL4A1,ELOVL6,FABP4,FASN,FGFR4,FN1,GATA4,HSPG2,IGF1R,IL6,INSR,IRS1,IRS2,LGALS3,LPL,MMP2,NOX4,NQO1,NTRK3,PDGFRA,PPARG,PTGS2,S100B,SCD,SLC2A4,SLC7A2,SOD3,SPP1,TRPC3,VEGFA	788 (21)
Histone h4		group			2.65e-06	ABCB1,ADA,AKAP12,CCL5,CD1D,CDK1,CDKN1A,CXCL3,DHFR,FASN,FLT1,GAS1,HPSE,IL6,KLF2,MGMT,Mt1,NCAM2,NTRK2,PCNA,PPARG,PREX1,PTGS2,RARB,RPL12,RRM2,SFRP1,SPHK1,SPP1,SYNPO,TYMS	583 (18)
butyric acid		chemical - endogenous mammalian		0.97	2.83e-06	ABCB1,ALDH1A1,ANXA1,AQP1,BCL2,BIRC5,CBS/CBSL,CCNB1,CCNB2,CDC20,CDK1,CDKN1A,COL4A1,COL5A1,COL6A3,CYCS,CYP1A1,DAG1,DDR1,ELK3,EPOR,FABP4,FASN,FSTL1,FURIN,FXN,G0S2,GAA,GADD45A,GATA4,GATA6,HBA1/HBA2,Hbb-b1,Hbb-b2,HDAC9,HMGB2,HSPG2,IFI16,IFI30,IGF2,IGFBP3,IL6,IRS1,ITGB5,KLK3,MKI67,MPP3,MYC,NFATC2,NFATC4,NME1,NPR1,NRP1,PCNA,PLAT,PPARG,PRKACA,PRKAR2A,PTGS2,SPP1,TGFBI,THBS4,THRA,TIMP1,TOP2A,TSLP,TYMS,VEGFA	719 (18)
GATA4	-0.87	transcription regulator		0.503	2.97e-06	ACTC1,ACTG2,ATP2A2,BCL2,Ccl6,CDCA8,COL1A1,COL1A2,COL3A1,CTHRC1,CXCL6,DAB2,DES,DIO2,EPOR,GATA4,GBX2,GJA1,GJA5,HSPB7,IFI16,IL6,IRF8,KCNJ2,LTBP2,MYC,NFATC2,NUSAP1,POSTN,PTGS2,PTPRB,RARB,S100A4,SCN5A,SPP1,TGFBI,THBS4,TIMP1	293 (9)
docosahexaenoic acid		chemical drug		1.427	3.06e-06	BCL2,BID,Ccl2,CDKN1A,COL1A1,CYCS,DPYSL2,ELOVL6,FADS1,FADS2,FASN,HPGD,IL6,LOX,LOXL1,MMP2,MRC1,MYC,NOX4,PDE5A,PDE6H,PLAT,PTGS2,Retnla,SCD,SMAD6,SMAD7,SORL1,SPHK1,THBS1,THBS2,TIMP1,TIMP2,UCP2	759 (24)
CNR1		G-protein coupled receptor		-0.78	3.17e-06	ALPL,BIRC5,BMP2,CA9,Ccl2,CCNB2,CDCA3,CDK1,EPS8,ERBB2,FASN,HEY2,HEYL,IGF1R,IL6,LRP4,NOD2,NOG,PCNA,PDGFRA,PDGFRB,PLD1,PTGS2,RGMA,S100A6,S100B,SLC2A4,SLIT2,TIMP1,VEGFC	698 (23)
MAPK9	-0.311	kinase		1.996	3.24e-06	AQP1,BCL2,BMP1,Ccl2,CCL5,Ccl7,CDKN1A,CYP1A1,DIO2,DLK1,EPAS1,FASN,FGL2,FOSL1,GADD45A,HDC,HMGA1,IFI16,IL6,LMNA,LPL,MARCKSL1,MIF,MYC,NR1H3,PLAT,PPARG,PTCH1,SCD,SERPINA1,SLFN12L,SOD3,THRA	643 (19)
HDAC1	0.014	transcription regulator		-1.313	3.35e-06	ABCB1,AKAP12,ANGPT2,CCL5,CCNB1,CCNB2,CD1D,CDK1,CDKN1A,COL1A1,COL1A2,COL9A1,DHFR,EGFR,FABP4,FAM107A,FLT1,IL6,KDR,KLK3,LCN2,LGR6,Meis1,MME,Mt1,Mt2,MYC,NKX3-1,PFKFB3,PLK1,PPARG,PREX1,PTGS2,RECK,RGS10,RHOB,RRM2,SFRP1,SLC12A5,SMAD7,SNAI1,SPP1,ST5,TNS1,TOP2A,TYMS	592 (21)
BDNF	-0.45	growth factor		0.491	3.35e-06	ACOT7,ADRB2,ARIH1,BCL2,BID,BMP2,CD36,CDKN1A,CSPG4,DPYSL3,ELOVL6,FLNA,FSCN1,GAP43,GNAI1,GNAQ,GPC4,GRB14,HSPA4L,IL6,ITIH3,LAMB2,LCN2,LYPD1,NCAM1,NECAB3,NMB,NPR1,NTRK2,PCNA,PFKFB3,PRKAR1B,PRKCZ,RELN,RGS4,S100A10,SFRP1,SFRP2,SH3BGRL2,Sik1,SLC12A5,SLC16A7,SORL1,SPP1,SPRED2,THBS1,THRA,TMBIM6,Tmsb4x (includes others),TRPC3,VASN,WNT2	678 (19)
filgrastim		biologic drug		-0.917	3.5e-06	ALPL,ANXA1,AOC3,ASF1B,ATP1A1,ATP9A,BATF,CCL5,CD74,CPD,CYP1B1,DACH1,DLC1,DPYSL3,EMILIN2,FABP5,FGL2,G0S2,GADD45A,GATA6,GNG11,GNGT2,GNS,GRINA,HEY1,HIP1,HMGA1,HPGD,IGF2BP2,IL31RA,ITPK1,LGALS3,LY75,METTL7A,MLXIP,MME,NCOR2,NDC80,NFKBIE,NKX3-1,PFKFB3,PLAUR,PRKAR2A,PRKAR2B,PTGS2,RARRES1,RASSF7,RBP7,RSAD2,S100A10,S100A4,SAMSN1,SERPINB1,SGSH,SLC26A6,SLC45A3,SMAD3,SORD,SORT1,SPON2,SPP1,SULF2,THRA,TRERF1,TRP…
kainic acid		chemical toxicant	Activated	2.051	3.56e-06	APOLD1,BCL2,CACNA2D1,Ccl2,CCL5,FGFR2,FGFR3,FOSL1,GAP43,GRIK5,HBEGF,HDC,HYOU1,KDR,LCN2,LMO1,NCAM1,NFIL3,NGF,NR4A2,NTRK2,PCNA,PER1,PTGS2,RELN,RET,Sik1,SLC16A1,SPP1,TIMP1,VEGFA	603 (21)
IL4		cytokine		0.176	3.61e-06	ABCA2,ABLIM1,ACTA2,ALOX12,ANO1,ANXA1,APOLD1,APRT,ARID5A,ASS1,BCL2,BIRC5,CAPG,Ccl2,CCL5,Ccl6,Ccl7,CD36,CD5,CD74,CDK1,CDKN1A,CKAP4,CLDN5,Cmah,CNRIP1,COL1A1,COL1A2,COL6A2,COL6A3,CRIP1,CSF2RB,Ctla2a/Ctla2b,CXCL3,CXCL6,EPAS1,FABP4,FASN,FLNA,FLRT2,FLT1,FN1,FNIP2,FSCN1,GADD45G,GATM,GJA1,GNA14,GNA15,GPM6B,HBEGF,HPGD,HSD11B1,IFI16,IFI30,IFITM3,IGF1R,IL10RA,IL13RA1,IL31RA,IL33,IL6,IRF5,IRF8,ITGA2,ITGB3,ITP…	641 (18)
CDK4	0.322	kinase		0.686	3.69e-06	AURKA,BRCA1,CDCA2,CDCA7,CDCA8,CDKN1A,CENPF,CENPK,CEP55,DHFR,ELN,ENPP2,FAM83D,FZD7,GPC6,KIF20B,KIF2C,KIF4A,MAML3,MNS1,NCAPH,PBLD,PSMC3IP,RBMS3,RGS2,SPC25,TMEM204,TPX2,TRIP13,ZNF423	433 (13)
NR4A1	0.046	ligand-dependent nuclear receptor	Activated	2.444	3.72e-06	ACTA2,ADM,APOD,BCL2,BIRC5,CCL5,CD36,CDH5,CLDN5,COL16A1,COL1A1,COL1A2,COL6A1,COL6A2,ELK3,FABP4,FASN,G0S2,GALM,GSK3A,HDC,IL6,KRT18,LPL,MARCKSL1,Mt1,NDUFS8,NR4A2,PC,PCNA,PDCD1,PPARG,PPP1R3C,PYGM,RAMP3,RAP1GAP2,RARB,SCD,SLC2A4,SLC37A2,SMAD3,SMAD7,STARD10,TRIM41,UBE2C,UCP2	713 (23)
E2F1	0.498	transcription regulator		1.925	3.88e-06	ABCB1,ABCG2,ALPL,AMY2B,ANGPT2,AURKA,AURKB,BCL2,BID,BIRC5,BOK,BRCA1,Calm1 (includes others),CCNB1,CCNB2,CD9,CDC20,CDK1,CDKN1A,DBF4,DHFR,ECT2,ERH,EYA2,FBXO5,FGFR1,FGFR2,FGFR3,FHL1,FKBP3,FLT1,GRAP,HELLS,HMGA1,HMGB2,IGF2,IRS1,IRS2,JAG2,KDR,KIF23,LCK,MAF,mir-24,MMP16,MYC,NDC80,NRIP1,NRP1,NUSAP1,PCNA,PLK2,POLA2,PPARG,PRKAA2,PSAT1,RACGAP1,RAD51,RANBP1,RHOBTB2,RHOQ,RRM2,SMC4,STMN1,THBS1,TK1,TOP2A,TYMS,UC…	576 (18)
valproic acid		chemical drug		-1.598	4.07e-06	Abca8a,ALOX12,ANK3,ATP11A,B4GALT1,BCL2,BIRC5,CAP2,CDCA7,CDKN1A,CENPM,CH25H,CYP1A1,CYP1B1,DAG1,DBI,EIF2AK3,ELOVL6,FAM107A,FNBP1,FOXC1,FSCN1,GAP43,GPAM,H6PD,HAPLN1,HMGCS2,HSD3B7,IGF1R,IL6,INSRR,LMO1,MAPK8IP1,Marcks,MBTPS1,MGMT,mir-24,MME,MTHFR,NCAM1,NME1,NQO1,PAQR7,PDGFRB,PLAT,PNPLA3,PPARG,PRKCZ,PRSS23,PTGS2,RNF144A,ROR1,S100A4,SCD,SEL1L3,SEMA3C,SPP1,SQLE,ST3GAL5,ST5,TCF7L2,TES,THBS1,THRB,THRSP,TME…	901 (23)
PROX1	3.464	transcription regulator		0.682	4.19e-06	ANGPT2,FGFR3,FLT4,FOXC2,HEY1,HOXD8,ITGA9,KDR,LYVE1,NRP1,RGS4
SRC (family)		group		1.662	4.31e-06	ATP1A1,BMP2,Ccl2,CD36,CYP1A1,FLT1,FN1,IL6,ITGB3,KCNB1,KLF2,PTGS2,S100A4,SLC6A4,SNAI1,VEGFC	592 (21)
CBL	-0.348	transcription regulator		-1.186	4.31e-06	BCL2,CDKN1A,COL1A1,CSF2RB,CXCL3,EGFR,ERBB2,FGFR2,FN1,IL17RA,IL6,INSR,LCK,LYN,MMP2,PDGFRA	611 (20)
GSK2816126		chemical drug		0.608	4.33e-06	ALPL,Ccl2,COL9A1,DUOX2,FRZB,HEY1,HOXD8,IGF2,IL6,NOG,PTH1R,SPP1,TNFRSF11A,WIF1	250 (7)
TERT		enzyme		0.279	4.41e-06	ASNS,BIRC5,CDKN1A,EFEMP1,EGFR,ELK3,EREG,ETS1,GATA6,HOXB6,HTRA1,IFI16,IL13RA1,IL6,KLK3,MMP2,MYC,PDGFC,PLOD2,PRSS23,PTGS2,RRM2,SMAD3,SPON1,SPP1,TACC3,TBX3,TK1,UBASH3B	570 (18)
calphostin C		chemical - kinase inhibitor		-1.664	4.54e-06	ABCB1,ACTA2,BCL2,BIRC5,CD36,CDKN1A,ECE1,ETS1,FN1,IGF1R,IL6,LPL,MYC,NGF,NQO1,PPARG,PTGS2,SLC2A4,VEGFA	568 (17)
Go 6976		chemical - kinase inhibitor		-1.824	4.64e-06	BMP2,BMP6,Ccl2,CCL5,CDKN1A,CXCL3,CXCL6,ERBB2,ETS1,FLT1,FN1,IL6,MMP2,NR4A2,PLD1,PTGS2,STC1,TRAF1	534 (20)
ITGAV	-0.536	transmembrane receptor		0.106	4.67e-06	BCL2,CD36,CDK1,CDKN1A,COL1A1,COL1A2,FN1,ITGB3,MMP2,PCNA,PTHLH,SOST,TIMP1	587 (22)
ACVRL1	-0.144	kinase		-1.726	4.67e-06	ANGPT2,CDKN1A,EFNA1,EFNB2,KDR,LYVE1,MYC,PLAT,PLAUR,SMAD1,SMAD6,SMAD7,VEGFA	647 (20)
VTN		other		-1.192	4.68e-06	BCL2,CDKN1A,COL1A1,COL1A2,CXCL3,EFNB2,IRS1,ITGB3,MMP2,PLAUR,PTGS2,S100A10	607 (20)
TFAP2A		transcription regulator		-0.049	5.11e-06	ALCAM,ANXA1,BCL2,BIRC5,BOK,CDKN1A,DCBLD2,DCLK1,EFEMP1,EGFR,ERBB2,EREG,FGFR4,HIPK3,IGF2,ITGBL1,Ly6a (includes others),MMP2,PLAUR,POR,PPARG,SLC19A1,TIMP1,VEGFA	618 (21)
TO-901317		chemical reagent		-1.02	5.16e-06	ADAM11,ADM,APOD,ASS1,Ccl2,CCNB1,CYP7B1,ELOVL6,FABP4,FABP5,FADS1,FADS2,FASN,FMO1,GPAM,Gsta4,HMGCS2,HSD11B1,IL6,ITGA6,ITIH4,LGALS3,LPL,LTC4S,Mt1,Mt2,NR1H3,PFKFB3,PGLYRP1,PNPLA3,POR,PPARG,PTGS2,SCD,SERPINA3,SLC27A2,SLC2A4,SMAD3,THRA,THRSP,TIMP1,VEGFA	519 (17)
PRKAA2	-0.812	kinase		0.617	5.28e-06	ACOT7,ACTA2,CAMK4,CDKN1A,EIF2AK3,FABP4,FASN,FGFR2,FN1,Foxp2,GALM,Gsta4,IL6,ITIH5,Ly6a (includes others),NCF2,NOX4,PCOLCE,PDGFRA,PPARG,SLC16A1,SMAD3,SNAI1,SORL1,TTYH1	606 (22)
paraquat		chemical toxicant		1.665	5.35e-06	ADAM22,ANGPT2,ATP8A2,BID,CCL21,COL1A1,ELN,FN1,Gsta4,Hist1h2bh,IL6,INHBA,KCNMA1,KLF2,LAMC2,LRP4,Mt1,Mt2,PLCE1,PTGS2,SOD3,STON2,STRBP,TIMP1,UTP14C,VEGFA	680 (19)
dinoprost		chemical - endogenous mammalian		0.728	5.36e-06	ADM,ATP1A1,ATP2A2,CD36,EGFR,FABP4,HMGCS2,IL6,LPL,MYC,NFIL3,NR4A2,PGR,POR,PTGS2,SPP1,TGFA,THBS1,THRSP,VEGFA	878 (27)
Ptprd	-1.277	phosphatase	Inhibited	-2.121	5.48e-06	BIRC5,Ccl2,Ccl6,CDK1,CDKN1A,GADD45G,IGFBP5,MYC	275 (7)
HIRA	-0.478	transcription regulator		1.414	5.48e-06	Ccl2,CXCL6,EFNB2,EREG,FLT1,PGF,PLXDC1,SPHK1
cerulenin		chemical drug		-0.396	5.48e-06	Ccl2,CCL5,CDKN1A,ERBB2,FASN,PPARG,UCP2,VEGFA	751 (22)
Rock		group		-1.411	5.69e-06	ACTA2,BMP2,CDKN1A,CNN1,COL1A1,COL3A1,DES,ETS1,FABP4,FN1,MYC,NOP16,PPARG,SORT1,SPP1,THBS1	657 (23)
SFRP1	-1.731	transmembrane receptor		1.281	5.69e-06	ACTA2,BIK,COL1A1,ELOVL6,FASN,FN1,IL6,KRT18,MMP2,MYC,NR1H3,SCD,SDC2,SFRP1,SLC2A4,TTYH1	690 (23)
CD38	0.799	enzyme		1.766	5.94e-06	ACTA2,ASNS,ASS1,CKAP4,COL1A1,CRIP1,CSF2RB,EGLN3,EIF4EBP1,EPS8,FGL2,FN1,GADD45G,GPAM,Hbb-b2,HMMR,IFI30,IL6,LGALS3,MKRN3,NCAM1,NEK2,NFIL3,PIM1,PSAT1,S100A4,S100A6,SAP30,Serpina3g (includes others),SLC16A3,THY1,UCHL3	734 (21)
CALR	-0.362	transcription regulator		-0.631	5.99e-06	ATP2A2,Calm1 (includes others),Ccl2,CDKN1A,COL1A1,COL1A2,COL3A1,CXCL3,FN1,GJA1,GJA5,INSR,LPL,PTGS2	699 (25)
phenacetin		chemical drug	Activated	3.208	5.99e-06	ANXA1,FBLIM1,LAMC2,LCN2,LGALS3,MRC1,MYC,RFTN1,S100A10,SPP1,TES,TIMP1,TSPAN8,UPP1
ionomycin		chemical reagent		1.508	6.24e-06	ANKH,ATP2A2,BCL2,BID,BMP2,CUL9,DUSP2,DUSP5,EIF4EBP1,ETS1,HPSE,IL6,KCNJ2,MAF,MYC,NFIL3,NGF,NR4A2,NRP1,PDCD1,PIM1,PPARG,PRKCZ,PTGS2,PTPRJ,PTPRS,RCAN1,RGS2,Sik1,SLC18A2,SLC6A6,SPP1,STC1,Tnfsf9,TRAF5	656 (20)
arsenite		chemical toxicant		0.644	6.26e-06	ABCB1,ADAM12,ALDH3A1,CDKN1A,CXCL3,CYP1A1,CYP1B1,EREG,FST,FZD1,GADD45A,HSPA4L,INHBA,INSR,KLF2,Mt2,MYC,NQO1,PPP1R3C,PTGS2,SEMA5A,SFRP4,THBS1,VEGFA,WWOX	726 (21)
MTOR	-0.077	kinase		0.52	6.28e-06	ADM,ATP2A2,ATP2B1,BCL2,BIRC5,CDKN1A,CYCS,DAG1,DHFR,EFNA1,EGFR,EPAS1,FABP4,FABP5,FASN,FGFR3,FN1,FST,GAP43,HBA1/HBA2,Hbb-b2,HMGCS2,HSD11B1,IFI16,IGF2,IL6,IP6K2,IRS1,IRS2,KLK3,MYC,NCAM1,NOX4,PCNA,PGR,PPARG,PRKAR2A,PRKAR2B,PRKCZ,PTH1R,RPL12,SERPINA1,SERPINB1,SGCA,SLC12A2,SLC16A3,SLC2A4,SNCG,SOX4,SRPX,TCF4,TK1,UBE2C,UBE2O,VEGFA	684 (18)
androgen		chemical drug		-0.71	6.37e-06	ADAMTS15,AGR2,APOD,AXIN1,BCL2,BMP6,CREB3L4,ETS1,FGFR2,FLNA,FOSL1,GJA1,IGFBP5,INHBA,KLK3,MMP23B,Mt1,MYC,NKX3-1,NTRK2,PIM1,PTGS2,RET,SFRP2,SMAD1,SMAD3,SOX4,STIM1,TWIST1,VAV3,VEGFC,VIL1,WIF1	630 (19)
IL17A		cytokine	Activated	2.177	6.41e-06	ACTA2,BCL2,BIRC5,Ccl2,CCL5,Ccl7,CD68,COL1A1,COTL1,CXCL3,CXCL6,CYP7B1,EREG,FMO1,FOSL1,GADD45A,HBEGF,IL17RA,IL33,IL6,KLF2,LCN2,LOX,LPL,MMP2,MRC1,MYC,NRP1,PGF,PPARG,PTGS2,Retnla,RGS16,STEAP4,TGFA,TIMP1,TIMP2,TNC,TNFRSF11A,TSLP,VEGFA,VEGFC	700 (17)
PRKAA1	-0.373	kinase		0.806	6.62e-06	ACOT7,ACTA2,BCL2,BIRC5,CDKN1A,CENPF,EGLN3,EPHA3,FGFR2,FN1,Foxp2,GALM,Gsta4,IGF1R,IL6,ITGB5,ITIH5,Ly6a (includes others),MATN2,MMP16,NCF2,PCOLCE,PDGFRA,PRKAA2,RGS2,SLC16A1,SMAD3,SORL1,THRSP,TTYH1	726 (24)
THBS1	-1.287	other		-0.476	6.64e-06	Ccl2,COL1A1,COL1A2,COL3A1,COL4A1,FN1,IL6,LAMA4,LRP1,MMP2,THBS1,TIMP1,VEGFA	670 (24)
STK11	-0.831	kinase		1.13	6.73e-06	ACE,ALCAM,ASS1,Ccl2,CDKN1A,COL3A1,CXCL6,DCTPP1,EREG,FGFR2,FN1,FOSL1,Foxp2,GADD45A,GALM,IGFBP5,IL33,IL6,MCAM,MMP2,MPST,MYC,NCAM2,NDUFA8,NDUFC2,NDUFS8,NRCAM,PDE2A,POLA2,PPP1R2,PSAT1,PTGS2,PTPRZ1,RRM2,SNAI1,SORL1,SPARCL1,SPP1,STARD10,TGFA,TOP2A,TTYH1,TYMS,VAV3,VEGFA,VIPR2,WNT2	665 (22)
pirinixic acid		chemical toxicant		0.41	6.87e-06	ABCG2,ACOT2,ALDH3A1,ANGPTL4,ASNS,ATP11A,Ccl2,CCL5,CCNB1,CD36,CDK1,CDKN1A,CFI,COL1A1,CXCL3,CYP1A1,CYP7B1,DBI,DYNLL1,EGFR,ELOVL6,FABP4,FABP5,FADS1,FADS2,FASN,FOXC2,FURIN,G0S2,GADD45A,GLCE,GPAM,HMGCS2,IFITM3,IL6,INSIG1,IRF8,ITGB5,JAG2,KDR,LCN2,LGALS3,LPL,MAP3K8,MEST,MYC,NR1H3,PCNA,PERP,PLEKHB1,PLIN4,POPDC3,POR,PPARG,PTGS2,PTPN21,PTPRS,SCD,SLC16A5,SLC27A2,SLC2A4,ST3GAL5,THRA,THRB,UCP2,VEGFA	507 (15)
HOXC8		transcription regulator		1.169	6.9e-06	ASS1,Ccl2,Ccl7,CNN1,FZD2,GAS1,GREM2,Ly6a (includes others),NQO1,RARB,SLC16A3,SPP1
lysophosphatidylinositol		chemical - endogenous mammalian	Activated	2.84	6.92e-06	ANGPT2,BMPR1A,CD36,CD5,CD74,CFB,CXCL3,CXCL6,FABP4,IL33,INSIG1,OLR1,PLCE1,SGPP2,STC1	355 (12)
THRA	-0.762	ligand-dependent nuclear receptor	Inhibited	-3.201	7.15e-06	ANGPTL4,ATP2A2,CAMK4,Ccl2,CDKN1A,CXCL3,DES,FASN,FGFR1,FGFR3,FRZB,FURIN,HCN2,IL6,IL7,LPL,NME1,Nrgn,PGR,POR,PPARG,RARB,RCAN2,SFRP2,SLC2A4,THRB,THRSP,TK1	529 (20)
norepinephrine		chemical - endogenous mammalian		-1.268	7.26e-06	ATP2A2,Ccl2,COL1A2,DES,DIO2,EIF2AK3,ELOVL6,ETNK1,FN1,FST,IGF1R,IL6,IRS2,KCTD3,MCAM,MFRP,MMP2,NGF,NPY1R,PCDH1,PCNA,PDE10A,PER1,PPARG,PTCH1,PTGS2,PTPN21,Sik1,SLC2A4,SMAD7,TC2N,THRSP,VEGFA	683 (25)
FGF19		growth factor		1.498	7.41e-06	ALDH1A1,AMY2A,BIRC5,CD36,CYP7B1,FABP5,FASN,G0S2,GADD45A,LCN2,LEPR,MCAM,MME,PEG3,RGS16,RGS2,SCD,SERPINA1,SERPINA3,SQLE,THRSP	455 (14)
hydrocortisone		chemical - endogenous mammalian		-1.538	8e-06	ADM,BRCA1,CDK1,FN1,GAP43,GPR153,H6PD,HSD11B1,IGFBP3,IGFBP5,IGFBP6,IGFBP7,IL6,INHBA,ITGA2,KLK3,LPL,LY75,Mt1,NOTCH4,NTRK2,NUSAP1,PPARG,PROX1,PTGS2,SFRP1,SMO,STC2,TP53I11	811 (20)
SOX4	1.586	transcription regulator		-0.327	8e-06	B3GNT8,BCL2,BIRC5,CD1D,CD74,CNRIP1,DBNDD2,EFNA5,FGF13,FHL1,FN1,GRB7,Hbb-b1,IFI30,Ifitm1,IGF2,LCK,LHFPL6,Ly6a (includes others),MARCKSL1,Mt1,NCAM1,NRXN2,PARD6G,RARRES1,RNF144A,SEL1L3,SLC2A6,SMAD1,SORT1,TAX1BP3,TBXA2R,TES,THSD1,Tmsb4x (includes others)	282 (7)
HBEGF	1.361	growth factor		-0.597	8.18e-06	ANGPTL4,ANKRD37,BCL2,BMP2,EGFR,ELN,EREG,GJA1,IGFBP3,NRP1,PTGS2,SLC16A3,TGFA,VEGFA	708 (19)
ATN1	-0.346	transcription regulator			8.31e-06	ATP1A1,ATP1B2,ATP1B3,BMP1,CAMK4,DPYSL3,EBF1,ETV1,GAS7,HBEGF,IFI16,IGFBP5,KCNK3,LSM2,LTBP2,Marcks,MARCKSL1,MCAM,NPTX1,RGS16,Sik1,SMC2,SOX4,SPP1,STMN1,THRA,THRSP,Tmsb4x (includes others)
lysophosphatidic acid		chemical - other		-0.273	8.41e-06	ACTA2,CACNA2D1,Ccl2,CCL5,CD36,CXCL3,EGFR,FABP4,HYOU1,IL6,KDR,LPL,MYC,PDGFRA,PDGFRB,PLAUR,PPARG,PTGS2,S1PR3,SNAI1,SPHK1,VEGFA,VEGFC	589 (20)
9Z,11E-octadecadienoic acid		chemical - endogenous mammalian		-1	8.61e-06	CD36,EBF1,FADS1,FASN,IL10RA,PPARG,PTGS2,SLC2A4,THBS1,UCP2	449 (16)
RARA	0.056	ligand-dependent nuclear receptor		1.847	9.22e-06	AASS,ABLIM1,ALDH1A1,ASPM,BIRC5,CD9,CDK1,CDKN1A,CDKN3,CENPA,CENPF,CENPM,CYP26B1,ENAH,EPHX4,FGFR1,FGFR4,FOXC1,GAP43,GATA4,GSK3A,HELLS,HOXA10,HOXD10,IGFBP6,IL6,KIF23,KLK3,LAMB1,LYPD1,Meis1,METTL7A,MYC,NAV2,NCAPG,NCAPH,NRP1,PBK,PTGS2,RARB,RARG,RARRES1,RASD1,RET,RSAD2,RTP4,SMAD3,SMC4,SMURF2,SPP1,STX3,TNFAIP8L1,TTC9,UBE2T,UBXN10,XK	598 (22)
testosterone		chemical - endogenous mammalian		0.496	9.22e-06	4930486L24Rik,Abca8a,ABCC9,ADRA2A,ANXA1,ATP2B1,BCL2,BGN,CAMK4,CDKN1A,CYP26B1,CYP7B1,EGFR,EIF4EBP1,ERBB2,FABP4,FGFR1,FGFR2,FGFR3,FN1,FOSL1,FST,GADD45A,HDC,HMGCS2,IGF1R,IGFBP3,IGFBP5,IL6,INHBA,IRS1,IRS2,KLK3,Mt1,NGF,NKX3-1,PCNA,PDE3B,PDE5A,PPARG,PRKCZ,PTCH1,PTGS2,RARG,SBDS,SLC6A9,STK11,STX3,TAC3,TEK,TGFA,THBS1,TK1,TOP2A,VCAN,VIPR1	835 (19)
MED13	-0.097	transcription regulator		-0.412	9.3e-06	CD36,ELN,ELOVL6,FASN,NR4A2,NTRK2,PPARG,PRKAR2B,SCD,Sik1,SLC2A4,SLC37A2,THRSP	78 (3)
NR3C1	0.021	ligand-dependent nuclear receptor		-0.458	9.38e-06	AATK,ABL1,ACTN1,ADM,AMIGO2,AMY2B,ANGPTL4,ANXA1,AQP1,AS3MT,BCL2,BMP2,BOK,BRCA1,C1QTNF1,C1QTNF7,C1R,CACNA2D3,CARD14,Ccl2,CCL5,CDKN1A,CKAP2,CLDN5,CXCL3,DAG1,DAPK2,DBI,DYNLL1,EFNA1,ELMOD2,ETNK2,FN1,GADD45A,GAP43,GAS1,H6PD,Hbb-b2,HMGCS2,HSD11B1,IGF1R,IL33,IL6,INHBA,INSR,IP6K3,IRF8,KLK3,MBD2,MEST,MGMT,MKNK2,Mt1,MYC,NFIL3,NOD2,NOTCH4,NQO1,OLR1,PDPN,PER1,PLEKHF1,PLK2,PPARG,PRKAR1B,PTGS2,RAPGEF4,RASD1,RBM…	843 (21)
Map3k7	-0.405	kinase	Activated	3.114	9.4e-06	Ccl2,CCL5,Ccl7,CXCL3,FASN,FGL2,GAS1,HBEGF,IL6,NFATC2,NGF,NOD2,PTGS2,RSAD2,SCD,SNAI1,SPHK1,TSC22D1	597 (19)
PLA2G5	-2.605	enzyme		-0.9	9.6e-06	COL1A2,COL3A1,PLA2G5,PTGS2,VEGFA,VEGFC	471 (21)
VHL	-0.186	transcription regulator		-0.35	9.63e-06	ALDH1A1,BCL2,CA9,CDKN1A,CNN1,DAB2,DUOX2,EGFR,EGLN3,EPAS1,FN1,GLCE,HYAL1,IFITM3,LMNA,LOX,MAF,MIF,NOX4,PCNA,PFKFB3,PTHLH,SLC16A3,TGFA,TRAF1,TYMS,VEGFA,VEGFC	704 (21)
PIM1	-0.867	kinase		-0.164	9.67e-06	ABCB1,ABCG2,ATP2A2,BCL2,CCNB1,CDKN1A,ERBB2,FOSL1,GNL3,IGF1R,IGFBP5,IL6,INSR,MYC,NKX3-1,PIM1	692 (20)
sunitinib		chemical drug		-0.59	9.7e-06	BIRC5,CDKN1A,COL5A1,COL6A1,CXCL3,CYP1A1,FN1,ITGA6,ITGA8,ITGB3,ITGB5,KDR,LAMB1,PDCD1,TGFBI,TIMP2,TNC	486 (19)
Pkc(s)		group		0.631	9.81e-06	ACTA2,ADM,BCL2,BIK,CD36,CDKN1A,CNN1,COL3A1,CYP1A1,DES,EGFR,FABP4,FN1,FOSL1,GADD45A,GAP43,HPGD,IGF2,IL6,IRS1,KCNJ2,MMP2,NOTCH4,NOX4,NQO1,NR4A2,PER1,PPARG,PTGS2,PTPRE,RARB,RGS2,SLC6A4,SLC6A9,SPP1,STC1,STC2,TNFRSF11A,VEGFA	765 (21)
TAZ	0.314	enzyme		-0.478	1e-05	ADAMTS5,ADRB2,ANXA1,AXL,COL1A1,COL5A1,CYP1B1,ENPP2,FLT1,FN1,IFI16,IRS1,LCP1,LOX,MYC,PLK2,PRSS23,PTGS2,RGS4,SEMA3C,TFPI2,UPP1,VEGFA	556 (18)
lithium chloride		chemical drug		0.5	1.03e-05	ASS1,B4GALT1,BCL2,BMP2,CDKN1A,DLK1,FSCN1,GATA4,HAPLN1,HEYL,KLK3,Marcks,MMP2,MTHFR,MYC,MYH11,PCNA,PER1,PKD1,PLD1,POSTN,PPARG,PTGS2,SNAI1,VCAN	665 (22)
HNF1A-AS1		other	Activated	2.333	1.04e-05	BIRC5,CEP55,HIST1H2BD,HMGB2,KIF22,KIF2C,NCAPG,NEK2,UBE2C
DAG1	-0.861	transmembrane receptor		-0.87	1.04e-05	CDH5,DAG1,EGFLAM,ITGA7,LAMB1,SGCA,SGCG,SNTA1,SSPN
IFNB1		cytokine		0.115	1.06e-05	AXL,BCL2,Ccl2,CCL5,CDKN1A,CH25H,CLSTN1,Ctla2a/Ctla2b,CXCL3,CXCL6,CYP1A1,DKK3,FBLN2,GAS1,GLIS2,GPC4,HMGB2,IFI16,Ifi27l2a/Ifi27l2b,Ifitm1,IL6,IP6K2,ITGB3,LAMB1,MMP2,MYC,NFKBIE,NID2,NNMT,NOD2,NPTX1,OGN,PDCD1,PKP2,PTCH1,PTGS2,RAD51,RSAD2,SPP1,SPRY1,SQLE,THBS1,THBS2,TIMP1,TIMP2,USP18,XAF1,ZBP1	696 (22)
fluticasone propionate		chemical drug		0.155	1.07e-05	ABLIM3,ADM,ANGPTL4,BGN,CCL5,CD36,CD74,CFB,FABP4,FBLN5,FSCN1,HPGD,HSD11B1,HTRA1,IRF8,IRS2,LPL,METTL7A,OLFML2B,OLFML3,OLR1,PCOLCE2,PLAC8,RARRES1,RCAN1,SERPINA1,SPP1,SPRY1,SRPX,THBS1,TIMP1,TSC22D1,TSLP	699 (18)
SREBF1	-0.419	transcription regulator		0.502	1.07e-05	AK4,ALOX12,BCL2,CAP2,CDKN1A,CFI,COL6A1,CYCS,CYP7B1,DBI,DLK1,ELOVL6,FABP4,FABP5,FADS1,FADS2,FASN,FN1,GPAM,HFE,IFI30,IL6,INSIG1,IRS2,KLK3,LGALS3,LPL,NCF2,NFIL3,NR1H3,PNPLA3,PPARG,PTGS2,SCD,SERPINA1,SERPINA3,SLC22A4,SQLE,SV2A,THRSP,UCP2,ULK2,VEGFA	568 (16)
SMAD2	0.132	transcription regulator		0.312	1.09e-05	ACTA2,ADAM12,BGN,CDH5,CDKN1A,COL1A2,FLT1,FN1,FSTL3,FURIN,IL6,MMP2,PTHLH,S1PR4,SKIL,SMAD3,SMAD7,SNAI1,SPHK1,THBS1,VEGFC	686 (16)
vancomycin		biologic drug	Activated	3.758	1.09e-05	AASS,ANXA1,ASNS,FBLIM1,FXYD5,LAMC2,LCN2,LGALS3,MRC1,MYC,NOX4,RCN1,RFTN1,S100A10,SCD,SOD3,SPP1,TES,TIMP1,TSPAN8,UPP1	294 (9)
LCN2	3.815	transporter		1.943	1.1e-05	ACTN1,BMP2,CAPG,Ccl2,CCL5,Ccl7,CKAP2,COL1A1,CXCL3,CXCL6,FASN,IL6,KIF23,MMP2,MRC1,RARB,Retnla,SCD,TWIST1	733 (23)
GATA2	-0.293	transcription regulator		-0.809	1.1e-05	AMY2B,ANGPT2,CCDC68,CCL21,CCL5,Ccnjl,CD36,CDH5,CDKN1A,DENND2A,DIO2,DLK1,EMCN,EPHA3,ETS1,FABP4,FAT1,GBX2,GIMAP8,HBA1/HBA2,Hbb-b1,Hbb-b2,HDC,HOXA10,IGFBP7,IL6,ITGA2,KDR,KHDRBS3,KLF2,KLK3,LCN2,Ly6a (includes others),LYL1,MMP2,MMRN1,MYC,NFIL3,NRXN2,Pcp4l1,PDE9A,PGR,PLK2,PPARG,PRG2,PRSS57,RCAN1,SAMD5,SEL1L3,SLC18A2,SLC22A4,SNTG2,SPN,TAC3,THBS1,TMEM40,TSPAN12,UBXN10,VEGFA	748 (24)
SMAD1	0.903	transcription regulator		0.621	1.11e-05	ACTA2,ALPL,CDKN1A,COL1A1,COL1A2,COL4A1,CXCL3,HEY1,MYC,SMAD1,SMAD6,SMAD7,SPP1,VEGFA	585 (20)
ANGPT1	-0.36	growth factor		0.664	1.11e-05	ADAMTS4,ADAMTS5,ADAMTS9,ALCAM,ANGPT2,BCL2,BIRC5,BMPR1A,CDH5,COL3A1,DUSP5,EFNB2,TEK,VEGFA	593 (20)
NOS2		enzyme		0.629	1.15e-05	ACTC1,ALDH3A1,ATP2A2,BCL2,BIRC5,Ccl2,Ccl7,CDKN1A,COL4A1,CXCL3,CYCS,FABP4,FASN,GJA1,HMGB2,IL6,IRS1,IRS2,ITIH4,KDR,LCK,LCN2,LPAR1,PC,PCNA,PERP,PTGS2,SERPINA3,SLC2A4,SLFN12L,Slfn2,Sprr2a1/Sprr2a2,THY1,TIMP1,VEGFA	631 (21)
PDX1		transcription regulator		0.362	1.15e-05	ARRDC4,ASNS,ATP2A2,Ccl2,COL1A1,COL3A1,Cyb5r3,DLK1,DUSP5,EDEM3,EFNA1,EIF4EBP1,FGFR1,GAP43,IGF1R,IGFBP3,IL6,INSIG1,IRS2,KRT18,MPHOSPH10,Mt1,MYC,NQO1,PC,PCNA,PRSS23,RHOBTB1,RSAD2,SLC6A6,SLIT3,SPP1,TCF7L2,TRPC3,TSPAN8	643 (19)
NR1H2	0.094	ligand-dependent nuclear receptor		-1.017	1.16e-05	ABCA2,ACE,AQP1,Ccl2,CCL5,Ccl7,DIO2,ELOVL6,FASN,HSD11B1,IL6,LPL,MRC1,NR1H3,PTCH1,PTGS2,RARB,SCD,SLC2A4,THRA,THRB,VEGFA	491 (21)
RBL2	-0.52	other	Inhibited	-2.826	1.2e-05	AURKA,AURKB,BRCA1,BUB1,CCNB1,CCNB2,CDK1,CDKN1A,DHFR,KPNA2,MYC,NEK2,PCNA,PIM1,PLK1,RANBP1,RRM2,SFRP1,STMN1,TEAD4,TRAF5,TYMS,VEGFA	480 (14)
ADRA1A		G-protein coupled receptor			1.21e-05	ADAM12,CCNB1,CDK1,COL3A1,CYP1A1,FABP5,FN1,IL6,LOX,NR4A2,PCNA,POLA2,PTHLH,TMPO,VEGFA	520 (19)
RHO		G-protein coupled receptor		0.728	1.23e-05	AQP1,CACNB2,Cbr2,CD74,COL1A2,DPYSL3,FBLN1,HFE,HMGB2,KCNB1,LAMB2,Mt1,NCAM1,PCOLCE,PLA2G7,S100A6,TRPC1
BIRC5	1.475	other			1.25e-05	AURKB,BCL2,BGN,BIRC5,CD74,CDKN1A,COL1A1,COL3A1,DPT,FBLN1,FMOD,FN1,IL2RG,LAMA4,MMP2,VEGFC	626 (20)
IgG		complex		-1.079	1.32e-05	ADM,ATP1B3,Ccl2,CCL5,CD9,CDKN1A,CLDN5,COL3A1,DSP,EFNA3,EGLN3,FABP5,FLT1,FN1,FST,HTR2B,IFITM3,IL6,INHBA,KLK11,KRT18,LCN2,LGALS3,Ly6a (includes others),MAF,MGMT,MYC,NGF,PDPN,PIM1,PLAUR,PTGS2,THBS1,TNC,TSLP,VEGFA	698 (17)
PRNP	0.407	other		-0.546	1.35e-05	ABCB1,BCL2,CCL5,CHST8,DAB2,EPS8,FOSL1,FST,GJA1,IGF1R,IGF2,IL6,IRS1,LRP1,MMP2,MYC,PLAUR,PRND,TCF4	678 (22)
carvedilol		chemical drug		0.162	1.36e-05	ACTA2,ATP2A2,COL1A1,COL3A1,FASN,GAP43,IL6,MMP2,MYC,TIMP2	524 (20)
topotecan		chemical drug		-0.833	1.42e-05	ABCG2,AKAP12,ASAP2,ATRNL1,AURKA,BUB1,CCNB1,CDKN1A,CSNK1G2,DUSP5,EPOR,FAT1,FGFR3,GPC6,HMMR,HS3ST1,IRS1,ITGA2,KCNMA1,MYC,NFATC4,Nrxn3,PCDH9,PLK1,PLK2,PRKAR2B,PSEN2,PTGS2,RBMS3,RELN,ROBO2,SOX4,TOP2A,VEGFA	644 (23)
N-cor		group		-0.072	1.42e-05	CCL5,CD36,CDKN1A,ELOVL6,FABP4,FADS2,FASN,FZD1,HBEGF,IGFBP3,INPP4B,MMP2,OLR1,PID1,PTGS2,RAB20,RARB,RHOB,SCD,SLC2A4,SLC44A1,TRERF1,USP18	614 (22)
sirolimus		chemical drug	Inhibited	-2.205	1.46e-05	ACTA2,ADA,ADM,ASNS,ASS1,ATP1A1,ATP6V0D2,BCL2,BID,BIRC5,BMP2,Ccl2,CD36,CD68,CDA,CDKN1A,COL1A1,COL1A2,CYCS,DES,DNAJC2,DPYSL2,ERBB2,FASN,FN1,FSCN1,GAP43,HMGCS2,IGF1R,IGF2,IGFBP5,IL6,IL7,INSR,IRS1,IRS2,KDR,KLF2,LAMB1,LCN2,LEPR,LGALS3,LMNA,MAF,mir-24,MMP2,MRC1,Mt1,MYC,MYH11,NCAM1,Nebl,NTS,PCDH1,PCNA,PDGFRA,PDGFRB,PIM1,PLAUR,POSTN,PPARG,RCAN2,RHOQ,S100A4,SCD,SLC12A5,SLC2A4,SQLE,STMN1,TIMP1,TMPO,TOP2A,T…	737 (22)
ZMPSTE24	-0.429	peptidase		-1.13	1.48e-05	Ccl6,CDKN1A,Cmah,CXCL3,FGFR4,GADD45A,GADD45G,IGF1R,IGFBP3,IGFBP5,IL6,LMNA,RGS16,SIRPA	712 (19)
ID3	0.108	transcription regulator		-0.756	1.49e-05	ADM,BATF,BCL2,CCL5,CCNB1,CDK1,CDKN1A,CSF2RB,DTX1,ELOVL6,GADD45G,GNL3,IFI16,IL10RA,IL6,IRF5,IRF8,ITGB3,JDP2,LEPR,MAF,MMP2,MYC,PDCD1,PKD2,PPAN,RAPGEF4,RPS6KA2,SMAD7,SOX13,SOX4,SOX5,TCF4,TRAF1,TRAF5,VPREB1	730 (23)
isoproterenol		chemical drug		0.132	1.51e-05	ABL1,ACE,ACTA2,ADCY5,ADRB2,ATP1A1,AURKA,BCL2,CDK1,CYP1A1,CYP1B1,DIO2,FABP4,FOSL1,GATA4,IL6,LPL,MMP2,MYOCD,NFATC4,NGF,PDE3A,PLAT,PTGS2,RGS5,SCD,TIMP1,TIMP2,UCP2,VEGFA	627 (22)
LEP		growth factor		1.311	1.55e-05	ACTA2,ANGPT2,ANGPTL4,ASB4,ASS1,ATP2A2,BCL2,BID,BIRC5,BOK,Ccl2,CCL5,CD36,CD68,CDKN1A,COL1A1,COL3A1,COL4A1,DLK1,ELOVL6,EPHX2,ERBB2,FABP4,FADS2,FASN,FGFR1,FGFR2,FLT1,GADD45A,GAP43,GPAM,HEY2,IGFBP3,IL6,IRS1,IRS2,KCNB1,LEPR,LPL,LTC4S,MMP2,MYC,NCF2,NPPC,NPR1,NPR2,NPY1R,NTS,PCNA,PGR,PLAT,PPARG,PRKAA2,PTGS2,SCD,SLC16A1,SLC2A4,SORD,SPP1,STEAP4,STK11,THBS1,THRSP,TIMP1,UCP2,VEGFA	764 (23)
cyclic AMP		chemical - endogenous mammalian		1.669	1.57e-05	ACTA2,ADRA2A,ANTXR1,AOC3,ASS1,BCL2,BMP2,CDKN1A,CYCS,DUOX2,ERBB2,FLT1,FN1,GAP43,GATA4,GATA6,GJA1,HBEGF,IGF2,IGFBP3,IGFBP5,IL33,IL6,INHBA,INSR,KCNJ13,KDR,KIF23,MEST,MME,MYC,NGF,NR4A2,PER1,PGR,PRKAR2B,PTCH1,PTGS2,PTHLH,RARB,TGFA,THRSP,TIMP1,TK1	811 (24)
LMNB1	-0.247	other		1.131	1.58e-05	Ccl2,CRIP1,FASN,FSTL1,GJA1,GPC4,HBEGF,LMNA,RAD51,RCN1,SCD,SLIT3,SQLE,TGFBI,THBS2	268 (7)
8-bromo-cAMP		chemical reagent		0.224	1.6e-05	ACE,ADM,BMP2,Ccl2,CLEC11A,CYP1B1,DIO2,EGFR,GATA6,GJA1,GNAI1,HPGD,IGF1R,IGF2,IL6,KDR,LOX,MMP23B,MYC,NFIL3,NQO1,NRP1,PDE3B,PGR,PLAT,PTGS2,RRM2,SLC2A4,SPP1,SYNPO,TIMP1,TIMP2,VEGFA,VEGFC	777 (20)
ID2	-0.06	transcription regulator		1.301	1.64e-05	ACTA2,ADM,BATF,BCL2,CCL5,CCNB1,CDK1,CDKN1A,CSF2RB,DTX1,FGFR3,GADD45G,IFI16,IL10RA,IRF5,IRF8,ITGB3,JDP2,LEPR,MAF,MMP2,MYC,NTRK2,PDCD1,PKD2,RAPGEF4,RPS6KA2,SEMA3F,SMAD7,SOX13,SOX4,SOX5,TCF4,TRAF1,TRAF5	685 (23)
dacinostat		chemical drug		0.905	1.75e-05	ABL1,ANGPT2,BCL2,BIRC5,CDKN1A,ERBB2,TEK,TK1,VEGFA	644 (20)
mir-192		microRNA		0.815	1.75e-05	ACTA2,ALCAM,CDKN1A,EREG,FN1,IGF1R,NOD2,TYMS,ZEB2	586 (17)
MLX	0.2	transcription regulator		0.734	1.75e-05	ARRDC4,Ccl2,Ccl7,ELOVL6,FASN,IGF2,SCD,THBS2,THRSP
PLAUR	1.245	transmembrane receptor		1.432	1.76e-05	ACTA2,Ccl2,CCL5,CXCL3,EIF2AK3,FOSL1,ITGA6,ITGB3,KDR,MMP2,MYC,PLAUR,SNAI1	641 (20)
ENG	-0.156	transmembrane receptor	Activated	2.03	1.76e-05	ACTA2,CDH5,ELN,FN1,ITGA6,ITGB3,KDR,MYC,PTPRJ,SMAD6,SMAD7,THBS1,TWIST1	701 (18)
10E,12Z-octadecadienoic acid		chemical - endogenous mammalian		1.219	1.82e-05	BCL2,BOK,Ccl2,CD36,EBF1,FABP4,FADS1,FASN,IL6,LRP1,ME1,NOTCH4,NR4A2,PPARG,PTGS2,SCD,SLC2A4,UCP2	418 (17)
EGLN		group	Inhibited	-2.524	1.83e-05	ADM,AK4,ANKRD37,CA9,Ccl2,EFNA1,EFNA3,EGLN3,EIF4EBP1,FSTL3,GREM2,IMMP2L,KLF2,LCN2,MAP3K8,MIF,MYOCD,NTS,PAM,PRSS57,RAB20,RIPPLY3,SAP30,SELENBP1,Serpina3g (includes others),SH2B2,SLC16A3,STC1,STC2,Tnfsf9,VEGFA	764 (19)
ulipristal acetate		chemical drug		-1.6	1.84e-05	ADM,BCL2,FLT1,GPR182,KDR,PGR,VEGFA	430 (7)
HNRNPAB	-0.002	enzyme		0.798	1.84e-05	ACTA2,HTRA1,PTGS2,S100A4,SNAI1,SPP1,TWIST1	289 (7)
STAT4	-0.203	transcription regulator		0.74	1.87e-05	ASPH,BCL2,Ctla2a/Ctla2b,CXCL3,DAPK2,EPOR,FSCN1,FURIN,FZD7,GADD45G,GCNT2,GJA1,IL10RA,IL6,ITGA7,ITIH5,JAG2,KRT18,LRP1,LTBP3,MAP3K8,Mt1,MYC,PDCD1,PER1,PKP2,PLAC8,PLOD2,RASL12,RGS16,S100A4,SELENBP1,SERPINB1,SMURF2,STC2,TIMP1,TWIST1,UNC13D,VEGFA	585 (16)
HNF1B		transcription regulator		0.73	1.93e-05	ACTN1,BGN,CDK1,COL5A1,EPS8,FBLIM1,FN1,FZD1,FZD2,GATA6,IGFBP3,LAMB1,MMP2,NID2,PKD1,PKD2,PLAUR,PTGIS,S100A4,S100A6,SEMA3C,SERPINA1,SNAI1,UPP1,ZEB2
LGALS3	2.522	other	Activated	2.841	1.97e-05	ABCB1,BCL2,Ccl2,CCNB2,CDKN1A,COL3A1,COL4A1,CTSF,CXCL3,ENPP2,FN1,FSCN1,IGFBP5,IL6,ITGA6,KRT18,MYC,NFATC2,PPARG,PRKCZ,Retnla,TCF4	762 (19)
INS		other		0.707	1.97e-05	ADM,ANO1,ASPH,CBS/CBSL,Ccl2,CD36,CDKN1A,EIF4EBP1,FASN,FOSL1,IGF1R,IGFBP3,IGFBP5,IL6,INSR,IRS1,IRS2,LPL,NOX4,NR1H3,PLK2,PPARG,PTGS2,RARB,RASL12,SCD,SLC2A4,SNAI1,Tmsb4x (includes others),VEGFA	693 (22)
MESP1		transcription regulator		-1.151	2.01e-05	FOXC1,FOXC2,GATA4,MYOCD,RASGRP3,SNAI1,TWIST1,ZEB2
cerivastatin		chemical drug		1.015	2.03e-05	ASS1,BMP2,CD36,CDKN1A,COL1A1,CYP1B1,DBI,ENPP3,FN1,IGF1R,IL6,INSR,KLF2,MYC,PLAT,PLAUR,PPARG,PTGS2,VEGFA	677 (18)
Ca2+		chemical - endogenous mammalian		1.315	2.09e-05	ABCB1,ACTA2,ADORA2A,ANKH,ATP2A2,BCL2,CDKN1A,COL1A1,CUL9,CYP1A1,CYP1B1,DES,EGFR,FABP4,FABP5,FASN,FGFR2,FN1,FOSL1,GJA1,HBEGF,HDC,IGF1R,IL33,IL6,IRS2,ITGA6,MCAM,MYOCD,NFATC2,NTRK2,PER1,PPARG,PTGS2,SBSN,SPP1,STC1,STIM1,STIM2,TCF4,TIMP2,TRPC1,TSLP,VEGFA	778 (23)
ACKR3		G-protein coupled receptor		-0.351	2.1e-05	ADM,AXL,BCL2,CCNB1,CDKN1A,COL9A1,ELN,FMOD,HBEGF,IGFBP7	494 (18)
pioglitazone		chemical drug		0.83	2.16e-05	ACTA2,ANGPTL4,AQP1,ATP2A2,BCL2,BRCA1,Ccl2,CD36,CDKN1A,CMKLR1,EPAS1,FABP4,FN1,FOSL1,HPGD,IL6,IRS1,IRS2,KLK3,LEPR,LPL,NCF2,PC,PCNA,PDE3B,PPARG,PTGS2,RARB,SLC2A4,SOST,TNFRSF11A,UCP2	673 (22)
RUNX3		transcription regulator	Activated	2.266	2.17e-05	ASPH,BIRC5,CDKN1A,COL4A1,COL4A4,CRIM1,EXTL3,FLNA,FSTL1,FZD2,GNAQ,ITGB5,KHDRBS3,LOX,MMP2,MYC,PTPN21,REEP1,RHOBTB1,SGPP1,SLIT2,SPP1,ST3GAL5,STC2,THY1,TIMP2	745 (25)
mir-21		microRNA	Inhibited	-3.625	2.22e-05	ACTA2,ASPM,BCL2,C1R,CCNB1,CDH5,CDKN1A,CKS2,COL1A1,COL3A1,DLGAP5,ECT2,ELN,FGL2,FN1,GTSE1,HIPK3,IFI16,IL6,IPO11,KIF23,KIF4A,LEPR,MKI67,MMP2,MYC,NME1,NUSAP1,PBK,PLAT,PPP4R2,PRC1,RACGAP1,RAD51AP1,RECK,RHOB,Slfn2,SMAD7,SMC2,SOD3,SPRY1,STMN1,TACC3,TOP2A,TRAF1	676 (20)
WT1		transcription regulator		0.682	2.28e-05	ACTN1,APRT,ASNS,BCL2,CBS/CBSL,CDKN1A,COL4A1,CSPG4,EFNA1,EGFR,EPOR,EPS8,ERBB2,EREG,ETS1,FGFR1,HBEGF,HSPG2,IGF1R,IGF2,INSR,IRF8,LGALS3,LRP1,MBTPS1,MMP2,MYC,NME1,NR4A2,NTRK2,PLAUR,RALGPS2,SLC6A6,SMAD3,SPRY1,SQLE,STIM1,THBS1,TSC22D1,VEGFA	661 (19)
phosphate		chemical - endogenous mammalian		1.026	2.28e-05	ADAMTS2,ALPL,ANKH,AXL,BMP2,CIT,COL5A1,Cyb5r3,DIO2,FGFR2,FOSL1,NCOA1,NCOR2,OGN,PCNA,PKD2,POSTN,SPP1,STC1,STC2,TIMP1	454 (13)
bee venom		chemical - endogenous non-mammalian		0.24	2.33e-05	Ccl2,CCL5,Ccl7,CCNB1,GADD45A,HSPA4L,KIF23,KLF2,MAP3K8,MKI67,NFIL3,NR4A2,NUSAP1,PRC1,PTGS2,RCAN1,RGS2,Slfn2,Tnfsf9,TOP2A,TRAF1,TSC22D1	585 (13)
H-7		chemical - kinase inhibitor		-0.797	2.37e-05	ABCB1,ALDH3A1,ANGPT2,COL1A1,COL1A2,CYP1A1,ECE1,FN1,HDC,Mt1,MYC,PIM1,SMAD3	624 (19)
ursodeoxycholic acid		chemical - endogenous mammalian		-0.053	2.42e-05	ABCB1,ABCG2,Ccl2,COL1A1,COL1A2,COL4A1,CYP1A1,DLC1,FASN,IRS1,LGALS3,MAF,PDGFRB,PRKCZ,PTGS2,SPP1,TIMP1	673 (24)
BRCA1	1.118	transcription regulator		0.746	2.5e-05	ANXA8/ANXA8L1,BCL2,BIRC5,BRCA1,CCL5,CCNB1,CCNB2,CDKN1A,CTSF,CYP1A1,CYP1B1,EGFR,ENPP2,EXO1,GADD45A,IGF1R,KLK3,Ly6a (includes others),MYC,NEK2,NQO1,PCNA,PERP,PLK1,Ptprv,RAD51,ROBO1,SMAD3,SNAI1,STC1,TWIST1,VCAN,VEGFA	659 (20)
ADRB		group		-0.339	2.58e-05	ABL1,ADAMTS4,ANGPTL4,AXL,BOK,Ccl2,CD68,CDKN1A,DIO2,GADD45A,GATA4,HSD3B7,INSIG1,LTBP1,NEK2,NPM3,NQO1,NR4A2,PCNA,PKD1,PTGS2,RAD51,RSAD2,SLC6A9,SMAD6,SRXN1,TEK,TRAF1	793 (22)
HOXD8	0.901	transcription regulator		0.922	2.6e-05	ANGPT2,HOXD10,HOXD8,HOXD9,PROX1
RBX1		enzyme		0.447	2.6e-05	BCL2,BIRC5,BRCA1,CCNB1,CDK1	733 (15)
mycophenolic acid		chemical drug		1.649	2.62e-05	ACTA2,ADM,ADRB2,AKAP12,C1orf116,CDKN1A,CXCL3,CXCL6,ETS1,FN1,GNL3,HBEGF,IL6,INHBA,MME,OLR1,PCNA,PTGS2,RGS4,TUFT1	557 (17)
Insulin		group		-1.186	2.66e-05	ACTC1,ANGPTL4,ASB4,BCL2,BIRC5,Ccl2,CD36,CDKN1A,CHRM3,COL1A1,COL4A1,CYP1A1,DBI,EGFR,EPAS1,FABP4,FADS1,FADS2,FASN,FGFR4,FN1,FOXC2,GRB14,HPSE,HSD11B1,IGF1R,IGF2,IGFBP3,IL6,INSIG1,INSR,IRS1,IRS2,KLK3,LAMB1,LEPR,LPL,ME1,mir-24,MMP2,MYC,NFE2L1,NFIL3,NPR1,NR1H3,NR4A2,PFKFB3,PPARG,PRKAA2,PRKCZ,PTHLH,SCD,SLC2A4,SLC6A4,SMAD7,SORT1,SQLE,TGFA,TGFBI,THRSP,UCP2,VEGFA	761 (21)
tannic acid		chemical toxicant		-0.447	2.67e-05	BCL2,CFB,FASN,IL6,PPARG,PTGS2	632 (21)
bevacizumab		biologic drug		-0.816	2.67e-05	ANGPT2,CXCL6,EGFR,KDR,NRP1,PGF	501 (15)
MK2 inhibitory peptide		chemical - kinase inhibitor	Activated	2.426	2.67e-05	ACTA2,COL1A2,COL3A1,FN1,LOX,MAPKAPK2	532 (12)
RET	1.047	kinase		-0.397	2.7e-05	ANXA1,BCL2,Ccl2,CLDN5,COL1A1,COL1A2,DPYSL2,DUSP8,EDNRB,ETV1,GJA1,IL6,ITGA6,KLK3,LOX,MAF,MAPKAPK2,PLAUR,PLOD2,PTN,RET,STC1,SYMPK,TACC3	681 (19)
LEPR	2.781	transmembrane receptor		0.247	2.74e-05	ACTA2,ANGPTL4,ATP2A2,BCL2,Ccl2,CD5,CD68,COL1A1,COL4A1,EIF4EBP1,FASN,FN1,GADD45G,GAP43,GATA4,GPAM,IGFBP3,IL6,INPPL1,IRS2,LCN2,LEPR,LGMN,LPL,mir-24,MMP2,PC,PPARG,SLC2A4,TCF7L2,TIMP1,UCP2	661 (22)
Z-LLL-CHO		chemical - protease inhibitor		-1.533	2.82e-05	ABCG2,ABL1,ATP1A1,BCL2,BIRC5,Ccl2,CCL5,CDKN1A,CFB,CYP1A1,DAG1,DHFR,DUSP8,EIF2AK3,EIF4EBP1,EPAS1,ETS1,FASN,G0S2,GNAI1,HMGB2,IL6,IRS1,IRS2,KCNH2,KLK3,MMP2,MST1R,MYC,NCF2,NOX4,NQO1,PDGFRA,PGR,PPARG,PRKAA2,PTGS2,RAD51,RANBP1,RARG,RGS4,RGS7,RHOBTB2,SCRIB,SGCA,STMN1,THBS1,TIMP1,TTK,VEGFA	745 (23)
Collagen type IV		complex		-0.478	2.83e-05	ACTA2,ITGB3,MMP2,MYC,PLAUR,PTGS2,PTH1R,THBS1,TIMP2	510 (20)
PAX3		transcription regulator		-0.179	2.88e-05	ANXA1,ASNS,ASS1,CDKN1A,CLDN5,COL1A2,CYP1B1,DUSP2,EYA2,FHL1,G0S2,GPR1,HSPG2,IL6,IRS1,LRRC17,MCAM,MEOX1,MEST,NNMT,PCNA,PGF,PPP1R2,PTHLH,RET,RHOB,SHMT1,SOX4,STX3,TEK,TFPI2,TNC,TRPC1,TSC22D1,VCAN	483 (7)
ZBTB16	-0.587	transcription regulator	Inhibited	-2.324	2.95e-05	BID,BMP2,Ccl2,Ccl7,CD74,CDKN1A,COL1A1,Ctla2a/Ctla2b,DTX1,EYA2,FGFR3,GP1BA,HOXD10,HOXD9,IL10RA,IL6,ITGB3,KLF2,Ly6a (includes others),LY96,MAF,MYC,PTGS2,RARG,SOX13,SPP1,TNFAIP8L1,TSC22D1	696 (24)
MMP9		peptidase		0.807	2.99e-05	ACTA2,Ccl2,CD68,CDKN1A,CLDN5,CXCL6,EGFR,GADD45A,GAP43,GJA1,HPGD,IL6,JAG2,MMP2,MYC,SERPINA1,TIMP1,TRAF5,VEGFA	554 (20)
triamterene		chemical drug	Activated	3.209	3.01e-05	ANXA1,ASNS,FBLIM1,FXYD5,LAMC2,LCN2,LGALS3,MRC1,MYC,RCN1,RFTN1,S100A10,SPP1,TES,TIMP1,TSPAN8,UPP1
sulindac		chemical drug		0.529	3.01e-05	ABCB1,BIRC5,CCL5,CCNB1,CCNB2,CDC20,CDK1,CDKN1A,CYP1A1,CYP1B1,EGFR,G0S2,MYC,NQO1,PTGS2,SERPINB1,VEGFA	675 (18)
SRSF1	-0.232	other		-1.325	3.07e-05	AURKA,AURKB,BIRC5,COL1A1,FN1,LMNA,MST1R,PLK1,RRM2,Tmsb4x (includes others),VEGFA
STAT5A	-0.428	transcription regulator		-1.036	3.08e-05	ABCB1,AGR2,ALDH3A1,BCL2,C15orf48,Ccl2,CD68,CDKN1A,Ctla2a/Ctla2b,CYP1B1,DUSP5,EGLN3,EPAS1,EPOR,FABP4,FASN,FKBP14,FOXQ1,GADD45A,GADD45G,GASK1B,GCHFR,HOXB6,Ifitm1,IL6,KLK3,KRT80,LCN2,MAF,MYC,NR1H3,NR4A2,OLR1,PIM1,PODXL2,PPARG,PRSS23,RAB19,SELENBP1,SERP2,SERPINA3,TGFBI,TNFRSF11A,TRAF1,TSPAN13,TSPAN8	739 (19)
DMP1		other		1.491	3.16e-05	ADAMTSL2,ALPL,BMP2,Cbr2,CDH5,CORO2B,CSDC2,IL6,Nrxn3,S100B,SLC6A9,SMAD6,SPP1	220 (7)
ASXL1	-0.425	transcription regulator	Activated	2.111	3.16e-05	ATP1A2,G0S2,HOXA10,HSD11B1,HYAL1,KLF15,LPL,POLR2K,PPARG,RARB,SCD,SLC2A4,VEGFA	236 (7)
RXRA	0.04	ligand-dependent nuclear receptor		-0.196	3.23e-05	ABCB1,ABCG2,ALDH1A1,ASNS,BRCA1,Ccl6,CCNB1,CD36,CDKN1A,COL1A1,DLK1,FABP4,FABP5,FADS2,FASN,FLRT3,FSTL1,HBEGF,HMGCS2,HOXD10,IGFBP6,IL6,INSIG1,LCN2,LPL,MMP2,NAV2,NDUFC2,NME1,NR1H3,OLR1,PC,PLD1,PPARG,RARB,RARG,RET,S100A4,SCD,SLC2A4,SPP1,TBXA2R,THRSP,TK1,TSLP,VCAN,VEGFA	639 (22)
MED1	-0.237	transcription regulator		1.389	3.27e-05	ANKRD37,AURKA,AURKB,BIRC5,CCNB1,CDC20,CDK1,CDKN1A,CENPA,CYP1A1,EBF1,ERBB2,FABP4,FADS2,FASN,GADD45A,Hbb-b1,IGFBP3,IRF8,KLK3,MYC,OLR1,PIM1,PLK1,PPARG,RARB,SLC2A4,STC2,TBX3,THBS1	763 (23)
MYB		transcription regulator		1.581	3.33e-05	ADM,ATP2B1,BCL2,BIRC5,BRCA1,CCNB1,CDK1,COL1A2,COL4A1,FN1,IGF1R,IGF2,IGFBP3,IGFBP5,KDR,MTSS1,MYC,PCNA,PDE2A,PTGS2,SLC27A2,SNAI1,SPHK1,SPP1,TWIST1,VPREB1	664 (23)
MYBL2	0.504	transcription regulator	Activated	2.75	3.34e-05	AURKA,BCL2,BIRC5,BUB1,CCNB1,CCNB2,CDK1,CENPE,ELN,IGFBP5,MYC,PLK1,TOP2A,UBE2C	476 (13)
MESP2		transcription regulator	Inhibited	-2.138	3.51e-05	FOXC1,FOXC2,GATA4,MYOCD,PAX9,SNAI1,TWIST1,ZEB2
INHBB	-0.757	growth factor		-1.254	3.51e-05	COL3A1,COL4A1,Ctla2a/Ctla2b,FST,MAN2B2,THBS1,TIMP1,TNC	345 (7)
PDGFRB	-1.619	kinase		1.331	3.69e-05	ACTA2,DAB2,EGFR,MYH11,PDGFRB,RGS5,SMAD1	690 (26)
nitric oxide		chemical - endogenous mammalian		1.371	3.7e-05	ACE,ARID1B,BCL2,BIRC5,Ccl7,CDKN1A,DAG1,DPYSL3,ECE1,EPOR,FLT1,GADD45A,HEY1,HSPG2,IL6,MKI67,MMP2,Mt1,Mt2,MYC,NCAM1,NQO1,PGF,PTGS2,SPP1,THBS1,TIMP2,TK1,UBE2C,VEGFA	695 (19)
Collagen type I		complex		0.2	3.71e-05	ACTA2,BIK,CCL5,COL1A1,EIF4EBP1,FN1,ITGA2,KDR,MMP2,MYC,PGR,PLOD2,PTGS2,RECK,S100A10,TIMP2,TNC	643 (19)
glutathione		chemical - endogenous mammalian		-0.021	3.71e-05	ABCB1,ASS1,BCL2,BIRC5,CA9,Ccl2,CDKN1A,EGFR,GNL3,IL6,MYC,PCNA,PDGFRB,PTGS2,TNC,VEGFA,ZBTB4	684 (20)
CCL2		cytokine	Activated	2.056	3.76e-05	ACTA2,BCL2,BIRC5,Ccl2,CCL5,CXCL3,EGLN3,FABP4,HDC,HTR2B,IL6,INHBA,LCN2,LPL,MKI67,MMP2,PCNA,PPARG,PTGS2,TIMP1	602 (20)
pyrrolidine dithiocarbamate		chemical reagent		-0.453	3.76e-05	ANXA1,ASS1,BCL2,BMP2,Ccl2,CCL5,COL1A1,CXCL3,CXCL6,DUSP8,FABP4,IGF1R,IL6,MMP2,MST1R,MYC,PDGFRA,PLD1,PPARG,PTGS2,SAMSN1,SLC2A4,VEGFA	434 (16)
fatty acid		chemical - endogenous mammalian		0.998	3.76e-05	BCL2,Ccl2,CD36,FABP4,FADS1,FADS2,FASN,GPAM,IL6,IRS1,LEPR,LPL,NR1H3,NR4A2,PLIN4,PPARG,PTGS2,SCD,SLC2A4,ST3GAL5,THRSP,TSLP,UCP2	588 (18)
4-methylnitrosoamino-1-(3-pyridinyl)-1-butanone		chemical toxicant	Activated	2.004	3.78e-05	ANXA1,BCL2,CDKN1A,EGFR,FASN,HTRA3,IL6,LCP1,LOX,PTGS2,SERPINA1,SPP1	640 (21)
diethylnitrosamine		chemical toxicant		1	3.82e-05	ACTA2,ALDH3A1,CDKN1A,COL1A2,COL3A1,CSTB,CYP7B1,DCLK1,IL6,LCN2,LPL,Mt1,MYC,NR1H3,PCNA,SELENBP1,SLCO2B1,TEK,THY1,TIMP1,TIMP2,VEGFA	709 (19)
EHF		transcription regulator		0	3.83e-05	ANGPTL4,CDK1,CYP1A1,ERBB2,EREG,GPR68,HOPX,IL6,KDR,KLK3,LYN,PLAT,PLAUR,RARB,SERPINA3,TCF4,THY1,TIMP1,TNC,VEGFA,VEGFC	519 (11)
docetaxel		chemical drug		0.351	3.83e-05	AURKA,BCL2,BIK,BIRC5,BUB1,CCNB1,CDC20,CDK1,CDKN1A,EGFR,EPS8,ERBB2,IGF1R,ITGA2,ITGB3,KDR,KLK3,NDC80,NEK2,PCNA,PIM1,PTGS2,THBS1,TUBB6,TYMS,VEGFA	664 (23)
dimethyl sulfoxide		chemical drug		-1.362	3.83e-05	AATK,ADAM12,ANXA1,B3GNT8,BIRC5,BMP2,CYP1A1,EIF4EBP1,EPOR,FRZB,FXN,GATA4,Hbb-b1,Hbb-b2,IFI16,IRS2,LCN2,LOXL4,LPL,MYC,NR2F2,PLD1,PTH1R,SMPD3,SPNS2,WIF1	627 (19)
H89		chemical - kinase inhibitor		-0.541	3.83e-05	ACE,ADORA2A,ANXA1,BCL2,Ccl2,CCL5,CDKN1A,EGFR,EREG,GJA1,HAPLN1,IGFBP5,IL6,MKI67,MMP2,MYC,NFATC2,NFIL3,NR4A2,NTS,PDE3B,PGR,PLD1,PTGS2,SMAD3,TGFA,UCP2,VEGFA	680 (21)
INHBA	1.181	growth factor		-1.533	3.99e-05	ACTA2,ACTN1,ADRB2,BCL2,BMP2,CDKN1A,DACH1,DTNA,EFNB2,EGLN3,EREG,FN1,FST,FSTL3,FURIN,IL6,INHBA,LOX,MAF,MMP2,NR4A2,NRK,PCDH9,PCNA,PCSK6,PLOD2,RGS16,SMAD6,SMAD7,SOX4,STRBP,TIMP1,VAV3,VEGFA	537 (19)
PKD1	-1.067	ion channel		1.053	3.99e-05	ABCG2,ACOT2,ADAM22,ADCY3,ADCY7,ALDH1A1,ASPH,ATP1A1,ATP1B2,AXL,CDKN1A,EGFR,EIF4EBP1,FAM151A,FGFR1,FGFR3,Foxp2,GATM,GRAMD1A,HBEGF,HDAC9,JPH2,KLK3,KRT18,LOX,LTBP1,MINK1,MYC,NAPEPLD,NNMT,PCDH9,ST5,STK11,SYNE1,TNS1	507 (12)
CAT	-0.083	enzyme		-0.361	4.24e-05	ADM,Ccl2,CD36,CDKN1A,CLCA1,COL1A1,CYP1B1,FN1,IGF1R,IL6,PTGS2,THBS1,TIMP1,TNC,XAF1	649 (20)
AIP	0.265	transcription regulator		0.786	4.31e-05	AKAP5,BIRC5,CMKLR1,CYP1A1,CYP1B1,GNG11,GPR39,NPY1R,PDE3A,PDE9A,RGS16,RGS2,RGS4,RGS7
ALDH1A2	-0.714	enzyme		-0.282	4.31e-05	ABCG2,ALDH1A1,BGN,COL1A2,COL3A1,Ly6a (includes others),PCOLCE,RARB,SPP1,TGFBI,TIMP1	572 (16)
ICMT	-0.86	enzyme			4.31e-05	Ccl2,CDKN1A,FSTL1,GJA1,GNGT2,GPC4,HBEGF,LMNA,SLIT3,TGFBI,THBS2	693 (18)
LIF	-0.678	cytokine		0.782	4.36e-05	ACTA2,ANKRD40,BATF,BMP2,Ccl2,CD9,CDH5,CDKN1A,ENPP2,EREG,FN1,GATA4,GATA6,HBEGF,HEY1,HPSE,IFI16,IL6,IL7,KDR,LBP,LPL,MYC,PAPPA2,PGR,PIM1,PLD1,PPARG,PTGS2,RET,RGS4,SERPINA3,SFRP4,SPP1,TIMP1,TNC,VEGFA	668 (22)
plicamycin		chemical drug		0.789	4.38e-05	ABCG2,ADAMTS4,AVPI1,AXL,CA9,CACNA2D3,CDKN1A,COL1A1,COL1A2,EGFR,EPS8,FASN,KDR,MAPK11,Marcks,MIF,MST1R,PLAUR,PLXDC1,RASL11B,ROR1,STARD10,TIMP1	615 (22)
TGFB1I1	-0.134	transcription regulator		-0.088	4.43e-05	CD36,CDKN1A,FN1,KLK3,KRT18,LTBP1,LTBP2,NOX4,SMAD7	638 (21)
GATA6	-0.738	transcription regulator		-1.064	4.45e-05	ABCB1,ACTA2,ACTC1,ATP6V0A1,BMPR1A,C1R,CDCA8,CDKN1A,COL4A1,DAB2,DCBLD2,DLK1,FKBP14,GATA4,GATA6,GBX2,HBA1/HBA2,HYAL1,IRF8,KLF2,LAMB2,LTBP1,LYVE1,MRC1,MYC,MYH11,NUSAP1,PDGFRA,PGM2,RARB,SCD,SEMA3C,THRSP,WNT2	306 (7)
PPIF	0.408	enzyme		1.091	4.52e-05	AMIGO2,ARHGAP22,BMP6,Ccl2,CCL5,Ccl6,Ccl7,CMKLR1,CXCL3,CXCL6,DLK1,HEY1,HOXD8,IL6,IRF5,MMP2,PDZRN3,PTN,Serpina3h,SFRP1,SPON2	284 (7)
F3	-0.387	transmembrane receptor		1.442	4.55e-05	Ccl2,DUSP2,EFEMP1,FGF13,FOXC2,GJA1,IL6,ITGA2,LAMB1,LCP1,MMP2,PODXL2,SEMA3A,SPRY1,TNFRSF11A,UBASH3B,VEGFA	639 (22)
CREM	0.469	transcription regulator		-0.276	4.56e-05	ACE,ACTC1,ADRB2,APOLD1,ATP2A2,BCL2,CAMK4,CCNB1,CH25H,COL3A1,CREB3L4,DIO2,IRS2,Marcks,MEST,MKNK2,MNS1,NFIL3,NR4A2,PDE3A,PDXK,PER1,RARB,RHOB,Sik1,SLC16A1,SMC4,THBS1,VEGFA	579 (20)
NOTCH4	-1.506	transcription regulator		-1.552	4.61e-05	ACTA2,CNN1,DES,EFNB2,FLT4,HEY1,HEY2,MYH11,RGS5,TEK
IL1		group	Activated	2.857	4.85e-05	ABCG2,ABL1,ADAMTS4,ADAMTS5,ADRB2,ALDH3A1,BCL2,BMP2,Ccl2,CCL5,CDKN1A,CFB,COL1A1,CSF2RB,CXCL3,CYP1A1,EGFR,F2RL3,FN1,FST,GJA1,HSD11B1,IGF1R,IL17RD,IL33,IL6,IL7,INHBA,LAMB1,LAMB2,LOX,LRP1,MMP2,MYC,NCOA1,NFATC2,NGF,NR1H3,NRP2,PANX1,PDGFRA,PDGFRB,PLD1,PPARG,PTGS2,SPHK1,THY1,TIMP1,TNC,VCAN,VEGFA,XDH	705 (16)
TFAP2C		transcription regulator		0.917	4.94e-05	ADA,ALCAM,CDKN1A,EGFR,ERBB2,FOXC1,FST,IGFBP5,Meis1,MMP2,MYC,NRP1,RET,SLC19A1,TGFA,THBS1,TIMP1,TK1	639 (11)
seocalcitol		chemical drug		-0.358	4.99e-05	BCL2,BIRC5,CDKN1A,FOSL1,GADD45A,IGFBP5,ITGA7,LRP1,MYC,NGF,NOMO1 (includes others),PCNA,PDGFRB,PTGS2,SSPN,VEGFA	706 (24)
17-alpha-ethinylestradiol		chemical drug		0.313	5.15e-05	ABCB1,ASNS,Ccl2,CCL5,CD68,CD74,CDK1,CDKN1A,CXCL3,CXCL6,CYP7B1,FBLN2,Gsta4,IFI16,IFI30,IL17RA,INPP5A,LCN2,MRC1,NME1,PCNA,PERP,PGR,PSEN2,SLC4A2,Sprr2a1/Sprr2a2,SPSB2,UHMK1,VEGFA	900 (21)
let-7a-5p (and other miRNAs w/seed GAGGUAG)		mature microRNA		1.174	5.15e-05	ACTA2,ATP6V0A1,AURKB,BIRC5,BMP2K,CAPG,COL1A1,COL1A2,COL3A1,DSP,FADS2,HBA1/HBA2,Hbb-b1,Hbb-b2,HMGA1,HYOU1,IGF2BP2,ITGB3,MLLT1,MYC,PTGS2,RHOB,RPP38,S100A4,SCD,SLC1A4,SMOX,THBS1,TYMS	509 (7)
resveratrol		chemical drug		1.184	5.18e-05	ACTA2,BCL2,BIRC5,BMP2,Ccl2,CCL5,CCNB1,CD36,CD68,CDKN1A,CYP1A1,CYP1B1,DYNLL1,ECE1,EGFR,EPHA1,FABP4,FASN,FN1,FOSL1,FXN,HEY1,HEY2,IGF2,IGFBP3,IL6,KDR,KLK3,MMP2,MRC1,MYC,NQO1,NRIP1,PCNA,PGR,PPARG,PRKAA2,PSEN2,PTCH1,PTGS2,RPTOR,SOST,SPHK1,SPP1,TNFRSF11A,TNS1	727 (23)
CDH1		other		0.385	5.19e-05	BIRC5,EGFR,EIF4EBP1,ERBB2,FN1,FOSL1,IGFBP3,ITGB3,KRT18,LCN2,MCAM,MYC,NCAM1,PFKFB3,PLAUR,RPTOR,S100A4,TSLP,VEGFA	762 (20)
MAPK7	-0.092	kinase		1.673	5.33e-05	ADRB2,Ccl2,CXCL3,DLC1,FOSL1,IL6,KLF2,NQO1,PDE3A,PLAT,PTGS2,SEMA3F,STEAP4,TEK,VEGFA	794 (24)
SLCO1C1	-0.48	transporter		-1	5.43e-05	ALDH1A1,HR,Nrgn,VEGFA
miR-331-3p (miRNAs w/seed CCCCUGG)		mature microRNA		-0.898	5.43e-05	CDCA5,ERBB2,KIF23,PLAUR
CYP11B2		enzyme		0.057	5.43e-05	IGF1R,KCNMA1,KCNMB1,VEGFA	200 (6)
PDGFRbeta-recognizing cyclic peptide		chemical reagent		1.969	5.43e-05	ACTA2,COL1A1,COL1A2,FN1
NME1	0.775	kinase		1.446	5.47e-05	BCL2,CDKN1A,EXOSC8,FZD1,ICMT,LPAR1,MMP2,PGR,PTGS2,PTN,SMAD7,SMO,TIMP1	471 (17)
POU5F1		transcription regulator		-0.109	5.55e-05	AXIN1,B3GNT7,BCL2,BID,BIK,BIRC5,BMPR1A,BRCA1,CDKN1A,DSP,DUSP5,EFEMP1,FRZB,GADD45A,GADD45G,GATA4,GATA6,GBX2,HOPX,IER5L,IGF1R,IL6,INHBA,IRS1,KLF2,KRT18,LOXL1,Meis1,MMP2,MYC,NCAM1,NFATC4,NKX2-3,NR2F2,NRP1,PCSK6,PDGFRA,PEG3,SERPINA1,SIRPA,SMAD1,SMAD7,SNAI1,SPP1,Sprr2a1/Sprr2a2,STIM1,TBX3,TWIST1,USP18,VEGFA,ZEB2	671 (19)
ITGB3	0.666	transmembrane receptor		-1.959	5.56e-05	BCL2,CD36,CDK1,COL1A1,COL1A2,FN1,ITGB3,ITGB5,KDR,MMP2,PCNA,PLAUR,PTGS2,SMAD3,SMAD7,SOST,TIMP1	587 (19)
fenamic acid		chemical reagent	Activated	3.196	5.56e-05	ANXA1,ASNS,FBLIM1,FXYD5,LAMC2,LCN2,LGALS3,MRC1,MYC,RCN1,RFTN1,S100A10,SPP1,TES,TIMP1,TSPAN8,UPP1
rifampin		chemical drug		0.436	5.61e-05	ABCB1,ARHGEF19,ATP2B1,BMP1,CD36,CEP70,COL6A1,CTNNAL1,CYP1A1,CYP4B1,ECT2,ENPP2,EPHA1,FGGY,GATA6,GPRC5B,HMMR,MATN2,ME1,MME,NCAPH,NEIL3,RACGAP1,RGS10,SERPINB1,SPP1,TGIF2,USP18
NRG1		growth factor	Activated	2.035	5.77e-05	ACTN1,ANGPT2,BCL2,BRCA1,CDKN1A,CKS2,COL1A1,COL6A3,CXCL6,DAG1,ERBB2,FABP5,FN1,FSTL1,GATA4,GRB7,HMGA1,IGF2,ITGB3,ITGB5,KLK3,MAF,MYC,NCOR2,PDE3A,PGR,PLAUR,PRKACA,PTGS2,PYGM,S100B,SGSH,SLC2A4,SNAI1,SOX4,TOB2,VEGFA,VEGFC	711 (21)
FZD8	-1.007	G-protein coupled receptor		-0.167	5.83e-05	ACTA2,BIRC5,BMP2,COL1A1,FN1,GATA4,IGFBP5,VCAN	564 (13)
EREG	-0.981	growth factor		0.187	5.83e-05	CXCL3,EREG,HBEGF,IL6,PGF,PTGS2,TGFA,TNC	758 (26)
NFYB	0.228	transcription regulator		-0.352	5.9e-05	ABCG2,ACTA2,BCL2,CACNA2D3,CBS/CBSL,CCNB1,CCNB2,CDCA8,CDK1,CENPF,CKS2,CLDN15,COL1A1,COL1A2,EPAS1,F8,FGFR2,FLRT2,GADD45A,GALNT2,GDF6,GPAM,GPR160,HMGB2,KHDRBS3,NPR1,PAQR5,PCNA,PDGFRB,PITPNM3,PLK1,RAD51,RHOB,RRM2,S100A4,SLIT3,SNAI1,TAX1BP3,THRSP,TMBIM6,TOP2A,TWIST1,TYMS	245 (8)
2,4,5,2',4',5'-hexachlorobiphenyl		chemical toxicant		0.426	5.92e-05	ADRB2,AKAP12,ATP1B2,BCL2,BCL9L,CDCA2,Ces2c,CLDN5,DHFR,EBF1,ELOVL6,FASN,FGFR1,GADD45A,INSRR,MYC,PIK3R2,POSTN,PTPRS,SLC1A4,SMAD7,SMOC1,SMPD3	194 (7)
bisindolylmaleimide I		chemical - kinase inhibitor		-0.813	5.92e-05	ACE,BCL2,CDKN1A,EGFR,EIF4EBP1,FN1,GAP43,GATA4,IL6,KLK3,LPL,MMP2,Mt1,NR4A2,OXTR,PCNA,PLD1,PTGS2,RCAN1,SAMSN1,SNAI1,TRAF1,VEGFA	660 (21)
TBX2		transcription regulator	Activated	2.548	5.96e-05	ASF1B,AURKA,AURKB,BUB1,CCNB1,CDCA3,CDCA5,CDK1,CDKN1A,CKAP2,ELK3,HAUS1,HELLS,HEY1,NFIL3,PLK1,PRC1,SMC2	583 (15)
TIMP1	0.953	cytokine		-0.905	5.97e-05	A4GALT,CDKN1A,FLT1,IGF2,IGFBP3,IL33,MME,MMP2,PLAT,PLAUR,TIMP2	646 (23)
thapsigargin		chemical toxicant	Activated	2.95	6.15e-05	ABCB1,ABCG2,ASNS,ATP2A2,CA9,Ccl2,CDKN1A,COL1A1,CREB3L1,CSK,CXCL3,DIO2,EIF4EBP1,ERBB2,ETS1,FN1,GADD45A,HAPLN1,HDC,HMGCS2,IL6,INSIG1,MTHFR,MYC,NFIL3,NGF,OLR1,PCNA,PDCD1,RCAN1,THBS1,THRSP,TMEM100	683 (18)
AEBP1	-0.156	peptidase		-1.783	6.19e-05	ACTA2,Ccl2,CD36,COL1A2,NR1H3,PPARG	686 (15)
DNMT1	-0.196	enzyme	Inhibited	-2.022	6.2e-05	BIRC5,BMPR1B,CDK1,CDKN1A,DLC1,EPDR1,FOXF2,GATA4,Hbb-b1,IGF2,KLF2,Mt1,MYC,PTGS2,PTN,RELN,RGS10,SFRP2,SFRP4	671 (27)
ADA	0.802	enzyme		-1.442	6.62e-05	ADA,Ccl2,COL1A2,CXCL3,IL6,PDE5A,PLAT,SPP1,TIMP1,VEGFA	417 (14)
epicatechin gallate		chemical drug		0.092	6.72e-05	CDKN1A,IL6,LYN,MGMT,PERP,PTGS2,RARB,TP53I11,VEGFA	688 (22)
ID1	0.107	transcription regulator		0.705	6.77e-05	ALDH1A1,CDKN1A,DTX1,DTX4,FABP4,FAM110D,FGFR3,FN1,IFI16,IGF2,Ly6a (includes others),MMP2,MYC,SCD,SNAI1,THBS1,TYMS	667 (22)
MEOX2	4.336	transcription regulator		-1.83	6.78e-05	CDKN1A,CXCL3,CXCL6,EFNA1,HBEGF,IL6,ITGB3,ITGB5,LRP1,PCNA,TRAF1,VEGFC	630 (16)
NEDD9	-0.193	other		0.577	6.78e-05	ADM,ANKRD37,BMP2,CA9,ITGA2,LRP1,MKNK2,MMP2,NRN1,PLAC8,PLOD2,STC1	588 (15)
PECAM1	-0.652	other		-1.285	6.82e-05	BCL2,BIRC5,CD36,CDH5,IL6,MMP2,THBS1	570 (20)
HHEX	0.119	transcription regulator		0.143	6.82e-05	FLT1,KDR,MYH10,NRP1,TEK,VEGFA,WNT2
DMH1		chemical reagent		-0.378	6.82e-05	ACTA2,CCL5,LOX,MMP2,MRC1,PTGS2,VEGFC
IGFBP2	-1.164	other		-1.032	7.01e-05	CADM1,EFEMP1,EGFR,ELOVL6,EMP2,ESCO2,FN1,IGFBP3,ITGA6,MMP2,MYC,POSTN,RBMS3,THBS2	765 (23)
BRD2	-0.279	kinase		-0.555	7.01e-05	BCL2,Ccl2,DYNLT1,EBF3,HBA1/HBA2,Hbb-b1,IL6,MYC,NQO1,ROBO1,S100A6,SH2D3C,SOX5,VAV3	694 (7)
candesartan		chemical drug		-0.723	7.01e-05	ACE,ADM,Ccl2,COL1A2,COL3A1,FN1,IL6,MMP2,OLR1,PDGFRB,PTHLH,SPP1,TRPC1,TRPC3	687 (23)
TXNIP	0.088	other		-0.095	7.09e-05	CD36,CDKN1A,COL1A2,DES,FASN,G0S2,IL6,LPL,NOX4,PCNA,PTGS2,THRSP,VEGFA	612 (19)
NCOA3	-0.215	transcription regulator		-1.915	7.16e-05	BCL2,CCNB1,CDKN1A,CYP1A1,ERBB2,FASN,FGFR2,IGF1R,IGFBP3,IRS1,KDR,MYH11,PCNA,PGR,PPARG,PTGS2,RARB,SLC16A3	756 (23)
GSK3B	-0.275	kinase		1.505	7.49e-05	ATP2A2,BCL2,BIRC5,Ccl2,Ccl7,CDKN1A,CXCL6,GATA4,IGF1R,IL6,IRS2,KDR,LAMB1,LCN2,MYC,NCOA1,PDCD1,PTGS2,SLC16A1,SNAI1,SPP1,TCF4,TCF7L2,TRAF1	657 (18)
lomustine		chemical drug	Activated	3	7.56e-05	ANXA1,ASNS,FBLIM1,FXYD5,LAMC2,LCN2,LGALS3,MYC,RCN1,RFTN1,S100A10,SPP1,TES,TIMP1,TSPAN8,UPP1
EWSR1		other		1.64	8.14e-05	ABL1,BCL2,CDK1,DLGAP5,ERBB2,GAS1,NUSAP1,PBK,PCDH17,RRM2,TOP2A
PIN1	0.627	enzyme		1.139	8.19e-05	BUB1,CDKN1A,CENPA,COL3A1,DEPDC1,FASN,FN1,IL6,MMP2,MYC,NCAPH,NCOR2,NFE2L1,PDCD1,PGR,PTGS2,TIMP1	663 (23)
Y 27632		chemical drug		1.587	8.19e-05	ACTA2,AXL,BMP2,Ccl2,CDKN1A,CLDN5,DPYSL2,FABP4,IL6,MMP2,MYC,MYH11,MYOCD,PPARG,PTGS2,SOX5,THBS1	640 (21)
tyrphostin AG 1478		chemical - kinase inhibitor		-1.586	8.19e-05	ACE,CDKN1A,EGFR,ELN,HAPLN1,HBEGF,IGF1R,IL6,ITGA2,MME,MMP2,NCF2,PTGS2,S100A10,S1PR3,SPHK1,TWIST1	674 (21)
ERG	0.086	transcription regulator		1.772	8.25e-05	ACTN1,ADRB2,ALOX12,ARHGAP22,BCR,CDC42BPB,DIP2A,ETS1,FAM174B,FHL1,FLT1,FMNL2,HMMR,HPGD,IGF1R,ITGA6,KLK3,MYO1D,NFIL3,NR4A2,NRCAM,PIM1,PLAT,PLAUR,PREX2,RALGPS2,RBMS1,RCAN2,RHOBTB1,SLIT2,SNAI1,SOX4,SPP1,THBS1,WNT2	612 (17)
mir-503		microRNA	Activated	2.218	8.44e-05	BCL2,FGFR1,IGF1R,SMAD7,SMURF2
CYP4F2		enzyme		1.406	8.44e-05	FLT1,IL6,KDR,NCF2,VEGFA	520 (10)
IGFBP4	0.466	other		-0.772	8.44e-05	ACTA2,IGFBP3,IGFBP6,MCAM,MYH11	484 (7)
ZNF423	-0.995	transcription regulator			8.44e-05	ADCY3,BRCA1,PPARG,RARB,SMAD6	232 (7)
CH-223191		chemical reagent		-1.287	8.44e-05	ACTA2,COL1A1,COL1A2,COL3A1,PTGS2	259 (7)
eugenol		chemical - endogenous non-mammalian		-1.067	8.44e-05	ACE,CDKN1A,IL6,PTGS2,SLC2A4	553 (11)
15-deoxy-delta-12,14 -PGJ 2		chemical - endogenous mammalian		0.881	8.51e-05	ACTA2,ADAMTS4,BCL2,BIRC5,BRCA1,Ccl2,CCL5,CCNB1,CD36,CDKN1A,COL1A1,COL1A2,FABP4,FLT1,FN1,GADD45A,HTRA3,IL6,KDR,KLK3,MYC,MYH11,NOX4,NQO1,PDGFRA,PPARG,PTGS2,RARB,SLC2A4,SPP1,TBXA2R,VEGFA	695 (25)
MSTN		growth factor		-1.241	8.84e-05	ACTA2,CDKN1A,DES,FN1,IGF1R,IGF2,IGFBP3,IGFBP5,IL6,INHBA,SMAD3,TNC,ULK1,VEGFA	718 (20)
CCN5		growth factor		0.066	8.84e-05	ACTA2,DSP,ERBB2,FABP4,FN1,IGFBP7,KRT18,LAMC2,LPL,PPARG,SLC2A4,SMAD3,TWIST1,ZNF423	610 (22)
STUB1	0.233	enzyme		1.544	8.93e-05	ACTA2,BIRC5,CDK1,CDKN1A,ERBB2,GATA4,IL6,MYH11,PCNA,RAD51,RIPK3,VEGFA	637 (19)
SIRT1	0.182	transcription regulator	Inhibited	-2.764	9.08e-05	ABCB1,ADAMTS5,ANO1,BCL2,BIRC5,Ccl2,CCL5,CCNB2,CD36,CD74,CDKN1A,CLCA1,CYCS,CYP1A1,EPAS1,EPDR1,FABP4,FASN,FGFR3,FN1,GADD45A,GATA4,HIST2H2BF,IFITM3,IGF1R,IL2RG,IL6,KLF2,LAPTM5,LCK,LGALS3,LRCH1,LTBP2,MLLT1,MMP2,MYC,NCAM2,NFKBIE,NPNT,NTRK2,PC,PER1,PNPLA3,PTN,RGS16,RSAD2,RTP4,SFRP2,SFRP4,Slfn2,SOST,SYNPO,UCP2,USP18	540 (17)
obeticholic acid		chemical drug		-0.578	9.11e-05	ABCB1,ACTA2,Ccl2,CD68,COL1A1,CXCL3,FN1,IL6,PPARG,PTGS2,SMAD6,TIMP1,TIMP2	578 (17)
SQSTM1	0.024	transcription regulator	Activated	2.033	9.11e-05	ARID5A,Ccl7,CKAP4,EGLN3,FGL2,HBEGF,IL6,NQO1,PLAT,PLK2,RSAD2,TSC22D1,USP12	520 (17)
mir-145		microRNA		-0.914	9.11e-05	ACTA2,COL5A1,EGFR,EIF2AK3,FSCN1,GATA6,IL6,IRS1,MYC,MYH11,MYOCD,PDE3B,PDGFRA	715 (23)
tributyrin		chemical drug	Activated	2.569	9.24e-05	ADM,ADRB2,AKAP12,C1orf116,CDKN1A,CXCL3,CXCL6,ETS1,HBEGF,IL6,INHBA,MME,OLR1,PTGS2,RGS4,TUFT1	554 (18)
NUMB	0.395	other		1.254	9.32e-05	CCNB1,CDK1,CDKN1A,EGFR,HEY1,HEY2,IFI16,Mt2	628 (20)
NT5E	-0.337	phosphatase	Inhibited	-2.63	9.32e-05	Ccl2,COL1A1,COL3A1,IL13RA1,IL6,MKI67,SPP1,TIMP1	637 (16)
ASXL2	0.032	other		-1.897	9.33e-05	ATP1A2,G0S2,HSD11B1,HYAL1,KLF15,LPL,PPARG,SCD,SLC2A4,VEGFA	297 (11)
Immunoglobulin		complex		0.07	9.47e-05	ADM,BATF,BCL2,BIRC5,BLVRB,CAPG,CBS/CBSL,Ccl2,CCL5,CD68,CD74,CHN2,CLCA1,CRISPLD2,CSF2RB,CXCL3,CXCL6,CYP1B1,DPYSL2,DSP,EIF2AK3,FAIM,FASN,GALM,GAS7,GSK3A,IFI30,IL10RA,IL33,IL6,INHBA,IRF5,KCTD12,KDR,LCK,LCN2,LTBP3,Ly6a (includes others),MAF,MICAL2,MMP2,MYC,NCF2,NDUFS8,NFIL3,NRP1,PC,PDCD1,PDE3B,PDLIM4,PTGS2,PYGM,RCN1,RGS16,RGS2,RSAD2,SCD,SIRPA,SMOX,SOST,SPHK1,SPP1,SQLE,TCF7L2,TIMP1,TNFRSF11A,TRAF1,TSL…	492 (17)
IL2		cytokine		1.994	9.83e-05	ADCY3,ANXA1,ARAP1,BCL2,BMP2,CAPG,Ccl2,CCL5,CD5,CD74,CD9,CDKN1A,CHN2,CMKLR1,CPD,CSF2RB,CXCL3,CYCS,CYP1A1,CYTH4,DAPK2,DUSP2,DUSP5,ENPP2,EPAS1,ETS1,FGF13,FGFR1,FGFR2,FGL2,GADD45G,GNAQ,GNL3,IL10RA,IL2RG,IL6,IP6K2,ITGA2,ITGA6,LAPTM5,LCK,LRMP,LTBP3,Ly6a (includes others),MAF,MAPKAPK2,MME,MMP2,MYC,NME1,Nrgn,NRP1,PCNA,PDCD1,PDE3B,PDGFC,PDLIM4,PIM1,PINX1,PLAC8,PLK1,PPARG,PTCH1,PTGS2,PTHLH,PTPRJ,RCN1,RFTN1…	536 (18)
deoxycorticosterone acetate		chemical drug		0.262	9.93e-05	CD68,COL3A1,EGFR,MYH11,PTGS2,SLC26A4,SLC2A4,SPP1,TNC
IHH		enzyme		0.954	9.93e-05	ALPL,FLT1,KDR,PTCH1,PTH1R,PTHLH,SMO,SPP1,VEGFA
arachidonic acid		chemical - endogenous mammalian		1.587	9.96e-05	BCL2,CD36,COL1A2,EGFR,ELOVL6,FABP4,FADS1,FADS2,FASN,FOSL1,IL6,KDR,MRC1,PLD1,PPARG,PTGS2,RGS2,SCD,SLC2A4,THRSP,UCP2	496 (16)
IL1A		cytokine		1.985	0.000102	ADAMTS4,ADAMTS5,ADORA2A,ALDH1A1,APOD,BCL2,Ccl2,CCL5,CDKN1A,CXCL3,CXCL6,CYP1A1,F2RL3,FGFR1,FOSL1,HDC,HSD11B1,HSPG2,IGFBP5,IL6,INHBA,ITGB3,LCN2,LOX,MCAM,MMP2,MYC,NGF,NR2F2,P2RY6,PPARG,PTGS2,SERPINA1,SERPINA3,SPP1,TK1,TSLP,VEGFC	715 (19)
SFTPA1		transporter		-0.12	0.000102	ADRB2,ANGPTL4,Ccl2,COL1A1,CXCL3,CYP1B1,FZD8,GPR68,HBA1/HBA2,HBEGF,IL6,KLF2,LOX,MRC1,MYC,RASD1,SFRP2,TWIST1	753 (18)
PPP3CA	0.067	phosphatase		1.352	0.000102	ALOX12,ATP2A2,BCL2,CD5,CD9,CDKN1A,FN1,IGF1R,KRT18,LPAR1,PDPN,PLD1,PTGS2,RCAN1,S100A4,S100B,SLC2A4,SPP1	548 (19)
Nr1h		group		-1.47	0.000103	ACE,ALDH1A1,APOD,BCL2,BMP6,Ccl2,CCL5,ECE1,ELOVL6,FASN,FLT1,FLT4,GPAM,H6PD,HIP1,IL6,LPL,MARCKSL1,PRKCQ,PTCH1,PTGS2,SCD,SFRP1,SLC2A4,SLFN12L,SYT7,THBS1,THY1	612 (19)
LMNA	0.902	other		0.168	0.000103	ACTA2,ADAMTS10,ANKRD37,ARRDC4,BCL2,C2orf40,COL1A1,COL3A1,DES,ELN,FABP4,FLT1,FN1,GATA4,GATA6,GJA1,GRAP,HAS3,HTRA3,IRF8,KANK3,KLF15,KRT18,LMNA,LRP4,MAP3K8,MCAM,MIB1,NPR2,PKD1,PPARG,RBMS1,RHPN2,SOX13,SPP1,STK35,TEC,TIMP2,TMEM164,TMPO	700 (25)
ETS1	0.808	transcription regulator		-0.623	0.000108	ABCB1,AXIN1,BRCA1,Ccl2,CCL5,CDH5,CDKN1A,COL1A2,ERBB2,ETS1,FGFR4,FLT1,FN1,GSK3A,HPGD,HPSE,INSIG1,ITGB3,LCK,MMP2,MYC,NFIL3,NKX3-1,NPR1,NQO1,PERP,PTHLH,SNAI1,SPP1,TGFA,THY1,TRPC1,TWIST1,TYMS,VEGFA,ZEB2	600 (18)
NORAD		other	Inhibited	-2.714	0.00011	COL4A1,COL5A1,COL6A2,FSTL3,IGFBP3,NCOR2,RHOB,SEC14L2,SLIT3,SMAD6,THBS1	280 (10)
SU6656		chemical toxicant	Inhibited	-2.728	0.00011	ADM,Ccl2,Ccl7,INHBA,Mt1,Mt2,MYC,NFIL3,NR4A2,PTGS2,VEGFA	578 (19)
methylnitrosourea		chemical toxicant		0.849	0.00011	ATP1A1,ATP1B3,AURKA,CCL5,CXCL3,FABP4,FASN,KDR,PCNA,PLAUR,TIMP2	648 (18)
CD24		other		0.074	0.000111	ADRB2,ASPM,BIK,CDKN1A,DEPDC1,DUSP5,EDEM3,EPHB6,HMMR,KIF18A,MCAM,N4BP3,NRIP1,RARRES1,SLC4A4,SMC4,SPHK1,TFPI2,THBS1,TMEM135,TOP2A,TUFT1	270 (7)
GLI2	-1.044	transcription regulator		-1.267	0.000111	BCL2,CCL5,CDK1,CDKN1A,CXCL3,CXCL6,FOXC2,GATA4,IL6,JAG2,KLK3,MEOX1,MYC,PAX9,PFKFB3,PTCH1,PTHLH,SFRP1,SMO,SNAI1,SPP1,TGFA	773 (26)
FBXW7	-0.272	enzyme		-1.714	0.000111	ADAM22,BIRC5,CD36,COL1A1,CREB3L1,DTX1,FABP4,GPAM,HEY1,ME2,MYC,NOTCH4,NQO1,PPARG	767 (22)
PTPRJ	-1.451	phosphatase	Activated	2.673	0.000111	ACPP,ARID5A,Ccl7,CXCL3,FGL2,HBEGF,HDC,IL6,INHBA,PLAT,PLAUR,PTGS2,SLFN12L,TSC22D1	681 (19)
HAND2		transcription regulator		-0.559	0.000112	ACTC1,ATP2A2,Ccl6,COL1A1,COL1A2,COL3A1,CXCL6,DES,GJA1,GJA5,HSPB7,IL6,NFATC2,PTGS2,PTPRB,S100A4
PIK3CA	-0.184	kinase		1.982	0.000112	ALCAM,ATP1A1,BIRC5,CA9,Ccl2,CCNB1,FASN,IRS1,IRS2,JAG2,PDGFRA,PDGFRB,SNAI1,THY1,TK1,TWIST1	688 (20)
LTBR	-0.076	transmembrane receptor		0.714	0.000116	ACTA2,BST1,Ccl2,CCL21,CNN1,ENPP2,GPM6B,IL6,PCDH17,PDGFRB,PDPN,PLXNB1,SERPINA1	422 (11)
NOTCH2	-0.48	transcription regulator		-1.652	0.000116	ACTA2,BCL2,CNN1,COL1A1,DES,DTX1,EGFR,HEY1,HEY2,IL6,MYH11,RGS5,SDC2	555 (12)
PADI2		enzyme	Activated	2.425	0.000118	ADAMTS9,CXCL3,CXCL6,IL6,MKI67,PTGS2,SNAI1	297 (7)
miR-143-3p (and other miRNAs w/seed GAGAUGA)		mature microRNA		-0.611	0.000118	BCL2,FNDC3B,IGFBP5,PDGFRA,PLK1,PRC1,TOP2A
EDNRA	-0.606	transmembrane receptor		-0.956	0.000118	COL1A1,COL3A1,ECE1,MMP2,PTGS2,TIMP1,TIMP2	695 (19)
HDAC3	-0.018	transcription regulator		-1.085	0.000119	BMP2,CCNB1,CCNB2,CD36,CDKN1A,COL1A2,ELOVL6,ENPP2,FASN,GPAM,IL6,KLK3,ME1,MYC,PTGS2,RARB,SCD,SMAD7,SPP1,USP18	528 (23)
Gsk3		group		0.463	0.000121	BCL2,BIRC5,EGFR,FABP4,FASN,FSCN1,IGF1R,IL6,IRS1,KDR,MYC,NR4A2,PDCD1,PPARG,PTGS2,SNAI1,SPP1,TWIST1	759 (22)
glucocorticoid		chemical drug		0.242	0.000124	ADRB2,ALDH3A1,ANXA1,BCL2,BMP6,CCL5,CD74,CDKN1A,CLDN5,CLEC11A,COL1A1,CRIP1,EGFR,FASN,FBLN1,FBLN2,FN1,IGFBP3,IL10RA,IL6,INSR,IRF8,KLK3,LPL,MIF,Mt1,MYC,NCF2,NGF,NOD2,NR4A2,OGN,PER1,PLAT,PPARG,PTGS2,PTHLH,RASD1,SERPINA3,SOST,SPP1,STC1,TK1,VEGFA,VIPR1	775 (23)
phenylbutazone		chemical drug	Activated	2.243	0.000126	ANXA1,ASNS,FBLIM1,FXYD5,LAMC2,LCN2,LGALS3,MRC1,PTGS2,RCN1,S100A10,SPP1,TIMP1,TSPAN8,UPP1	397 (10)
SLC30A7	-0.065	transporter		-0.059	0.000126	ALOX12,CD36,EPHX2,EPHX4,INSR,IRS2	256 (7)
PBRM1	0.059	other			0.000126	CCNB1,CDK1,CDKN1A,CENPE,CENPF,RARB
VEGFC	0.657	growth factor		1.741	0.000126	BCL2,FLT4,KDR,PROX1,PTGS2,VEGFC	675 (17)
eplerenone		chemical drug		0.101	0.000129	ACE,Ccl2,CD68,FN1,MMP2,NOX4,PPARG,PTGS2,SPP1,VEGFA	733 (18)
TCF7L2	-0.661	transcription regulator		-0.204	0.000134	AATK,ADAMTS4,ANXA1,APOD,ARHGEF10,ASPH,BIRC5,CDKN1A,CPD,CTNNAL1,DBNDD2,EGFR,ENPP2,ENTPD5,EPAS1,FGFR2,FMNL2,GJC2,HMGCS2,IRS1,IRS2,KLHL4,LAMC2,LPAR3,MCAM,ME1,MYC,NCOR2,NKX6-2,NUDT4,PKD1,PLAT,PLEKHB1,PLEKHG3,POP4,PTPDC1,RHBDL2,SDC2,SH3GL3,SLC12A2,SLC27A2,SLC44A1,SMAD7,SNX18,SPP1,SYDE2,TNS1,UTP14C,VEGFA	728 (24)
cigarette smoke		chemical toxicant		1.208	0.000134	ACTA2,ADM,ALDH3A1,BCL2,BIK,BIRC5,Ccl2,CDKN1A,CHRM3,CXCL3,CYP1A1,CYP1B1,ELN,EMCN,EPAS1,FABP5,FOSL1,GADD45G,HAS3,IL6,KDR,MMP2,NOX4,NQO1,P2RY6,PGF,PPARG,PRKCZ,PTGS2,PTPRB,SERPINA3,SLC1A4,SLC6A9,SMAD7,SOD3,TIMP1,Tmsb4x (includes others),TSLP,VEGFA,XDH	613 (20)
mir-15		microRNA		0.611	0.000136	BCL2,BIRC5,Ccl2,CCL5,EGFR,IL6,LATS2,PCNA,PIM1,PLAUR,PTGS2,RECK,SLC6A4,SMURF2,TIMP1,UCP2	575 (13)
trans-hydroxytamoxifen		chemical drug		1.877	0.000138	BIK,COL4A5,CYP1B1,EFNA1,EPOR,ERBB2,GNS,IFI30,LAMB1,LAMB2,LHFPL2,MATN2,MYO1B,PLK2,PPP1R3C,PRSS23,SELENBP1,SLIT2,SMAD3,SNCG,STC1,TOP2A,TTC9	593 (7)
oleic acid		chemical - endogenous mammalian		-0.416	0.000138	ANGPTL4,Ccl2,CD36,CD68,FABP4,FASN,GADD45A,IGFBP3,IL6,LCN2,LPL,Mt1,Mt2,NR1H3,OLR1,PLIN4,PNPLA3,PTGS2,SCD,SLC2A4,SPHK1,THRSP,UCP2	578 (19)
MAP3K1	-0.335	kinase		0.344	0.000138	COL3A1,COL4A1,Ctla2a/Ctla2b,MAN2B2,MAPK8IP1,PGR,PLAUR,PTGS2,RGS4,RGS7,THBS1,TIMP1,TNC,TOP2A	651 (20)
TAF4		transcription regulator		-0.846	0.000139	COL6A3,EGFR,ETS1,FMOD,GAS1,HBEGF,HOPX,ITGA6,MMP2,OLFML3,PBK,PDGFC,PTN,SCUBE1,SFRP2,SPP1,THBS1,THBS2,VAV3,VEGFC
ZFP36	-0.332	transcription regulator	Inhibited	-2.96	0.000143	CD36,CDKN1A,CENPA,COL3A1,CXCL3,FOSL1,IL6,KIF18A,LATS2,LCN2,NEK2,PBK,PIM1,PLAUR,PRC1,PTGS2,SPP1,TOP2A,TRAF1	646 (17)
miR-296-5p (miRNAs w/seed GGGCCCC)		mature microRNA		0.78	0.000144	ABCB1,BCL2,COL1A1,HMGA1,PCNA,SCRIB,TNC,VEGFA
HOXD3	0.62	transcription regulator		-0.213	0.000144	COL1A1,DSP,HOXD10,IGFBP3,ITGB3,MMP2,TGFBI,THBS1
DDX5	-0.166	enzyme	Activated	2.206	0.000144	ACTA2,CDKN1A,FOSL1,HTRA1,LCN2,MYC,S100A4,TIMP1	725 (21)
JUNB	-0.166	transcription regulator	Activated	2.395	0.000146	CD68,CDC20,COL1A1,COL1A2,CXCL3,CYP1B1,FASN,FBLN2,FBLN5,FN1,FOSL1,HPGD,IL6,INHBA,ITGB3,LCN2,LPAR1,MMP2,NCF2,PLAUR,SCD,SNAI1,TBX3,TIMP1	714 (20)
IL33	2.925	cytokine	Activated	2.664	0.000146	ALDH3A1,ATP10A,AXL,Ccl2,CCL5,Ccl7,CD36,COL3A1,CXCL3,DUSP2,EPAS1,EPHX2,FLT1,G0S2,GCHFR,HDC,Ifitm1,IL2RG,IL6,IRF5,LEPR,Marcks,NFKBIE,PLAT,PRG2,PSEN2,RAMP3,Retnla,RPS6KA2,SKIL,SOST,ST3GAL5,TIMP1,TRAF1,TSLP,TUBB6,VEGFC,ZHX2	630 (17)
omeprazole		chemical drug			0.000147	ADORA2A,BIRC5,CD36,CDKN1A,CNN1,CYP1A1,EPAS1,FST,HDC,ITGA6,NDRG4,NTRK2,POR	511 (9)
n-3 fatty acids		chemical drug		0.389	0.000147	CBS/CBSL,ELOVL6,FADS1,FADS2,FASN,IL6,IRS1,IRS2,MTHFR,PPARG,PTGS2,SCD,SLC2A4	640 (21)
folic acid		chemical - endogenous mammalian		1.389	0.000154	ABCG2,BCL2,Ccl2,CCL5,CDKN1A,FZD1,IGF2,MMP2,NOX4,PCNA,PTH1R,PTHLH,SFRP1,TEK,TYMS	785 (26)
5-azacytidine		chemical drug		1.902	0.000162	ABCB1,CDKN1A,COL1A1,DLK1,FOSL1,GADD45A,GSK3A,HBEGF,INHBA,IRF8,IRS2,KDR,LOX,Ly6a (includes others),MGMT,Mt1,MYO1B,NTRK3,PTGS2,RARB,RHOB,RRM2,SMURF2,SPHK1,TFPI2,THBS1,THBS2,UPP1	568 (19)
Raf		group		0.934	0.000164	B4GALT6,CDKN1A,ETV1,FOSL1,IFI16,IGF1R,KRT18,MYC,MYH11,RARB,RET,SEMA3C,SPRED2,SPRY1,STON1,TOP2A	692 (22)
PLAU	0.573	peptidase		0.973	0.000164	ACTA2,Ccl2,CCL5,CXCL3,EGFR,FLT1,FN1,GJA1,IL6,ITGB5,KDR,PLAUR,PTN,Retnla,SERPINB1,SNAI1	571 (18)
TSC2	-0.483	other	Inhibited	-2.627	0.000166	ANXA1,BIRC5,Ccl2,CD68,CDKN1A,CRIP1,FAM107A,GAP43,HMGCS2,IFITM3,IGFBP5,IRS1,IRS2,LGALS3,Mt1,NFE2L1,NTRK3,PDGFRA,PDGFRB,PRELP,S100A6,SCD,THRSP,UCP2	763 (21)
COL18A1	-0.092	other		-0.088	0.000167	ANTXR1,BCL2,CDH5,EDNRB,EFNA1,EFNB2,EGFR,ETS1,FGFR1,FN1,IL6,ITGB3,KDR,MMP2,MYC,NRP1,PTGS2,THBS1,VEGFA	696 (23)
NS-398		chemical reagent		-0.175	0.000167	ANGPT2,BCL2,BIRC5,CCL5,CCNB1,CDKN1A,COL1A2,FAT1,GATA6,HAPLN1,IL6,MMP2,PCNA,PPARG,PTGS2,RECK,SPP1,TFPI2,VEGFA	479 (18)
Bvht		other		-0.791	0.000169	ACTA2,ACTC1,EBF1,EPOR,ETS1,FOXC2,GATA4,HBA1/HBA2,Hbb-b1,Hbb-b2,HOXB6,IGF2,KDR,MYOM1,PRDM6,SNAI1,TWIST1	182 (7)
NTRK2	-0.768	kinase		1.871	0.000169	ABCB1,ABCG2,BID,BMP2,CDCA3,CDCA5,CDCA8,CDK1,CDKN1A,HEY2,MYC,PCNA,SLC12A5,SPP1,THBS1,TWIST1,VEGFA	657 (21)
nifedipine		chemical drug		-1.521	0.000169	ABCB1,ANKH,ATP2B1,BIRC5,BMP2,FN1,IGFBP5,IL6,INSR,IRS1,NGF,NTRK2,POSTN,PTGS2,SLC2A4,TYMS,VEGFA	726 (22)
isotretinoin		biologic drug		-0.299	0.000169	BCL2,CDKN1A,CYP1B1,FASN,HPGD,IGFBP3,IL6,LCN2,OLR1,PTGIS,PTGS2,RARB,RARG,RARRES1,SERPINA3,SLC12A8,SPN	809 (27)
PP2/AG1879 tyrosine kinase inhibitor		chemical - kinase inhibitor		1.119	0.00017	ACE,BCL2,CDKN1A,DSP,EGFR,EPHA3,FN1,HOXD10,IGF1R,IL6,KLK3,LYN,PER1,PTGS2,PTPRJ,RRM2,SPP1,VEGFA	722 (24)
IL11		cytokine		-0.306	0.00017	BCL2,DLK1,F8,FABP4,GP1BA,IL6,LBP,PAPPA2,PPARG,SERPINA3,SMAD6,SPHK1,SPP1,TIMP1	664 (23)
ABCB4		transporter		0.659	0.000176	ACTA2,Ccl2,COL1A1,COL1A2,COL4A1,LGALS3,MMP2,PDGFRB,SPP1,TIMP1	478 (7)
PRKAR1A	-0.018	kinase	Inhibited	-3.113	0.000176	BCL2,EGFR,ERBB2,GATA4,MYOCD,NR4A2,PPARG,PRKACA,PRKAR2B,SMAD3	574 (7)
4-(2-aminoethyl)benzenesulfonylfluoride		chemical - protease inhibitor		0.529	0.000176	ADAMTSL1,ATP1A2,CDKN1A,COL1A1,COL1A2,ENPP2,ENPP3,FN1,SPN,TNC	431 (13)
1,4-bis[2-(3,5-dichloropyridyloxy)]benzene		chemical toxicant	Activated	3.285	0.000179	BUB1,CCNB1,CCNB2,CDC20,CDK1,CDKN1A,Ces2c,CKAP4,CYP7B1,DIO2,EIF4EBP1,FAM107B,FASN,HMGCS2,INSIG1,LRG1,Mt1,PDE3B,RARRES1,SCD,STEAP4,THRSP,UCP2	615 (13)
TLR4	-0.371	transmembrane receptor	Activated	3.657	0.000182	ACPP,ADM,ARID5A,BATF,BCL2,BMP2,Ccl2,CCL5,Ccl7,CERK,CFB,CXCL3,CXCL6,DAB2,DLK1,DUOX2,DUSP2,EFNA1,EREG,FGL2,GADD45G,GJA1,HBEGF,HDC,HPSE,HTRA1,IFI16,IFITM3,IL6,INHBA,IRF8,LCN2,LTC4S,MIF,MYC,NOD2,NR4A2,OXTR,PGR,PLAT,PLK2,PPARG,PTGS2,RGS16,RSAD2,SAP30,SLFN12L,SPHK1,SPP1,TCF4,TRAF1,TSC22D1,TSLP,USP12	751 (18)
atorvastatin		chemical drug		0.335	0.000184	ABCB1,BCL2,BMP2,BMP6,Ccl2,CD36,COL1A1,ENPP3,FLT1,GJA1,GPAM,HBA1/HBA2,IL17RD,IL6,LPL,MMP2,MYOCD,NOX4,NR1H3,OLR1,PDXK,PLAT,POSTN,PPARG,PTGS2,RHOB,S100B,SLCO2B1,SOD3,SPP1,SQLE,TNFRSF11A,VEGFA,ZNF652	743 (23)
RETN		other		1.722	0.000184	CXCL3,FABP4,FABP5,FASN,FURIN,IL6,INSR,LPL,PLAT,PTGS2,SCD,SLC2A4,SPP1	866 (26)
2-bromoethylamine		chemical reagent	Activated	3.058	0.000184	ANXA1,FBLIM1,FXYD5,LAMC2,LCN2,LGALS3,MRC1,MYC,S100A10,SPP1,TIMP1,TSPAN8,UPP1
LRP1	-1.865	transmembrane receptor		0.437	0.000184	C1R,Ccl2,CD68,COL3A1,IL6,INSR,LRP1,MMP2,MRC2,PDGFRB,PTGS2,SLC2A4,SMO	647 (22)
CIP2A		other		-0.989	0.000187	ACTG2,BCL2,CFB,FAM110D,GADD45A,LRP4,MYC,NPTX1,PDE2A,PDGFRB,PLAUR,PTPRB,S100A16,SLC12A8,SLC22A4
PELP1	-0.671	other	Inhibited	-2.138	0.000187	ADRB2,BMP2,DAB2,EGFR,KLK3,MMP2,MRAS,MRC1,MYC,NCOR2,NKX3-1,PRKCQ,PSAT1,PTGS2,TCF7L2	738 (21)
ACVR1	-0.393	kinase			0.000192	ALPL,C1R,CDKN1A,Fndc1,FSTL1,Ifi27l2a/Ifi27l2b,IL33,NOG,OGN,SRPX2,SUSD5,TSLP	369 (10)
fenofibrate		chemical drug		-0.194	0.000195	ACOT2,ANGPTL4,ASNS,ATP11A,Ccl2,CCL21,CD36,CD68,COL1A1,DBI,EGFR,FABP4,FADS2,FASN,GADD45A,GLCE,GPAM,Gsta4,IL6,IRF8,JAG2,KDR,LPL,MEST,MGMT,NACC1,NR1H3,PCNA,POPDC3,POR,PTGS2,PTPN21,PTPRS,SCD,SLC27A2,SLC2A4,SLCO2B1,THRA,THRB,TIMP1,UCP2	480 (17)
HIF1AN	-0.458	enzyme		-1.27	0.000195	ADM,ANKRD37,BIRC5,CA9,EGLN3,HEY1,VEGFA	662 (14)
MDK	0.826	growth factor		-0.168	0.000195	ACE,ACTA2,BCL2,Ccl2,CXCL3,MYOCD,PLAT	579 (17)
4-nitroquinoline-1-oxide		chemical toxicant	Activated	2.433	0.000195	AURKA,AURKB,CCNB1,CCNB2,CDK1,CDKN1A,PTGS2	468 (7)
IL6R	0.404	transmembrane receptor		0.878	0.0002	CCL5,CD36,CDKN1A,COL1A1,COL1A2,CXCL3,CXCL6,FN1,IGF2,IGFBP5,IL6,MMP2,PTGS2,SERPINA3,TIMP1,TNFRSF11A,VEGFA	631 (19)
CHI3L1		enzyme			0.000203	COL16A1,COL6A1,COL6A2,IGFBP5,NNMT,SERPINB1,TGIF2,TNC,VEGFA	470 (7)
IGF2BP1		translation regulator		-1.72	0.000203	COL1A1,COL1A2,COL5A1,COL6A2,COL6A3,CYFIP2,IGF2,MYC,TNC
MAP2K2	-0.047	kinase		-1.264	0.000203	CDKN1A,IL6,IRS1,ITGB3,MYC,PCNA,PDGFRA,PLD1,VEGFA	741 (25)
ACACA	-0.459	enzyme		-1.109	0.000209	ELOVL6,FASN,GPAM,PPARG,SCD	585 (15)
PKP2	-1.02	other		0.49	0.000209	Ccl2,COL3A1,DSP,FN1,GJA1	591 (7)
miR-192-5p (and other miRNAs w/seed UGACCUA)		mature microRNA		0.08	0.000209	BIRC5,DHFR,IGF1R,TYMS,ZEB2
JINK1/2		group		0.243	0.000215	Ccl2,Ccl7,FASN,IL6,MMP2,RHOB,SCD,SLC2A4	825 (25)
FBN1	0.083	other		1.254	0.000215	COL1A2,COL3A1,COL6A3,INHBA,LTBP1,LTBP3,MMP2,PPARG	678 (13)
SMARCE1	0.207	transcription regulator	Inhibited	-2.121	0.000215	BCL2,BRCA1,CCNB1,CDK1,CENPE,CENPF,MYC,PGR	575 (13)
SCX	-0.524	transcription regulator		-0.097	0.000215	COL1A1,COMP,HAPLN1,POSTN,SNAI1,SOX5,SPP1,TNC
acetaldehyde		chemical - endogenous mammalian		-0.02	0.000215	COL1A1,COL1A2,IL6,MMP2,MYC,PPARG,SMOX,TIMP1	592 (16)
26s Proteasome		complex	Activated	2.324	0.000226	ADARB2,ATP6V0D2,BMP2,CD68,CDK1,CDKN1A,CENPE,CTSF,CXCL3,EGFR,EREG,EXO1,FOSL1,HBEGF,HMGB2,IL6,KIF23,MYC,PGR,PKD1,PTGS2,Retnla,SKIL,SNAI1,TK1,TOP2A,UBE2H	686 (20)
OSMR	-0.01	transmembrane receptor		1.528	0.000226	BCL2,BIRC5,C15orf48,Ccl2,FASN,GAP43,IL6,LBP,LRG1,Mt2,PIM1,SCD,SERPINA1,Serpina3g (includes others),TIMP1	545 (20)
VGLL3	-1.241	other		0	0.000234	ADM,COL1A1,COL1A2,Ptprv,SPP1,THBS1
ALOX12	1.309	enzyme		-0.168	0.000234	CXCL3,FN1,FOSL1,MMP2,PDGFRA,VEGFA	605 (21)
NELFB		other		0	0.000234	CDKN1A,COL6A1,GADD45A,Ifi27l2a/Ifi27l2b,MKNK2,VEGFA	272 (7)
CR1L	-0.002	other	Activated	2.538	0.000237	BGN,COL1A1,COL1A2,COL3A1,COL4A1,COL5A1,COL6A1,COL6A3,PTGER4,TNC	627 (16)
UXT	0.512	transcription regulator		-0.96	0.000237	B4GALT1,BUB1,GTSE1,HPGD,KDELR3,KLK3,KRT18,NKX3-1,SORD,TTK	444 (7)
KLF11	0.064	transcription regulator		0.258	0.000241	ACTA2,BCL2,CHRM3,COL1A2,COL3A1,DIO2,ITGA2,ITGB3,ITGB5,LOX,LTBP1,MMP2,MYC,PLAT,SERPINA1,SMAD3,SMAD6,SMAD7,SNAI1,THBS1,THBS2,TIMP1,TIMP2,VEGFA	359 (13)
ALB		transporter		1.199	0.000244	ACTA2,Ccl2,CCL5,CDKN1A,COL1A1,EDNRB,HPSE,IL6,PTGS2,SCD,SYNPO,VEGFA	601 (16)
SKIL	-0.657	transcription regulator		-0.473	0.000244	ACTA2,ADAM12,CDKN1A,CKS2,COL1A2,COL4A1,DIXDC1,RHOBTB1,SKIL,SLC44A1,SMAD7,THBS2	571 (15)
TNC	-1.156	other		-1.238	0.000244	ADAMTS4,BCL2,Ccl2,CDKN1A,CXCL3,CXCL6,EGFR,EREG,HTRA1,IL6,MMP2,MYC	628 (18)
advanced glycation end-products		chemical - endogenous mammalian		1.118	0.000244	BCL2,CDKN1A,CLDN5,FN1,GJA1,IL6,KLF2,MKI67,PTGS2,ROBO1,SLIT2,SPP1	531 (21)
nitrofen		chemical toxicant		1.36	0.000248	AQP1,EPAS1,FGFR1,FGFR2,FGFR3,FOXQ1,HYOU1,ITGA6,S1PR2,TIMP2,VEGFA
TWIST2		transcription regulator		-0.14	0.000248	CDKN1A,DUSP5,FBLN5,FN1,HOXB9,MAF,OSGIN1,POSTN,SNAI1,TWIST1,ZEB2	277 (7)
DACH1	1.055	transcription regulator		-0.102	0.000248	CDKN1A,CXCL3,EFEMP1,FGFR1,IGFBP3,IL6,KLK3,PTGS2,RAD51,RELN,STC2	646 (14)
thalidomide		chemical drug		-0.464	0.000248	ANGPT2,COL1A1,IL6,KCNMA1,KDR,NRP1,NRP2,PIM1,PLAUR,TRAF1,VEGFA	725 (18)
clofibrate		chemical drug		1.549	0.00025	ABCG2,ACOT2,CCNB1,CD36,CDK1,CYP1A1,EGFR,GADD45A,HMGCS2,IL6,Mt1,Mt2,MYC,NQO1,NR1H3,PLEKHB1,PTGS2,SCD,SLCO2B1,UCP2	445 (16)
8-epi-prostaglandin F2alpha		chemical - endogenous mammalian		1.067	0.000253	MMP2,OLR1,PTH1R,PTHLH	552 (12)
FA2H		enzyme		-1	0.000253	FASN,INSR,SCD,SLC2A4	187 (7)
URI1		transcription regulator		1.732	0.000253	CCNB1,CDK1,KLK3,NKX3-1	102 (3)
atrasentan		chemical drug		-0.152	0.000253	BCL2,BIRC5,PTGS2,VEGFA	297 (7)
RORA	-0.216	ligand-dependent nuclear receptor		-0.176	0.000259	ACOT2,ASNS,B3GALT1,Ccl2,CCL5,CCNB1,CD36,CH25H,CLCA1,CYP7B1,ELOVL6,FASN,HPGD,IL6,KCNK5,LCN2,Mt1,Mt2,NNMT,NTRK2,POR,PPP1R3C,PTGS2,SCD,SELENBP1,SEMA3F,SLC16A7,SLC2A13,SLC2A4,SULF2,UBE2O,UCP2	630 (15)
GW9662		chemical reagent		-0.909	0.000263	AGR2,ANGPTL4,BCL2,CD36,CDKN1A,EGLN3,FABP4,FASN,FN1,GPAM,IL6,INSIG1,IRS2,KDR,LCN2,PPARG,PTGS2,RARB,UCP2	390 (14)
gentamicin C		chemical drug	Activated	3.357	0.000272	ANXA1,ASNS,FBLIM1,FXYD5,LAMC2,LCN2,LGALS3,MRC1,MYC,RFTN1,S100A10,SPP1,TES,TIMP1,UPP1
allopurinol		chemical drug	Activated	2.846	0.000273	ANXA1,ASNS,FBLIM1,FXYD5,LAMC2,LCN2,LGALS3,MRC1,MYC,PTGS2,RCN1,RFTN1,S100A10,SPP1,TES,TIMP1,TSPAN8,UPP1	654 (21)
linoleic acid		chemical - endogenous mammalian		0.435	0.000279	ANGPTL4,Ccl2,CD36,FABP4,FASN,IL6,KDR,LPL,OLR1,PLIN4,PTGS2,SCD,SLC2A4,TWIST1,UCP2,VEGFA	350 (13)
FOXA1		transcription regulator		0.817	0.000281	ACTA2,ACTC1,ACTG2,AGR2,ANXA1,BMP2,CDKN1A,CNN1,ELK3,FNDC3B,FOXC1,FSTL1,GFRA4,GRIN3A,IL6,KLK3,LHFPL6,LYN,MYC,MYH11,MYOCD,NR4A2,NRIP1,PAM,PGR,SLC12A2,UST	791 (25)
CTSB	0.091	peptidase		-0.296	0.000281	ACTA2,COL1A1,CXCL3,EIF2AK3,KDR,MYC,PLAUR,SPHK1,VEGFA	666 (20)
DPP4		peptidase	Activated	2.008	0.000281	CCNB1,FABP4,LRP1,MMP2,SLC2A4,THBS1,TIMP1,TIMP2,TOP2A	688 (24)
trabectedin		chemical drug		-0.407	0.000281	ABCB1,CDK1,CDKN1A,COL1A1,GADD45A,IGF1R,LGMN,PPARG,TK1	688 (17)
NOG	4.201	growth factor	Inhibited	-2.525	0.000284	BMP2,FST,KDR,MYC,NCAM1,NOG,PTCH1,PTGS2,SMAD1,SOST,SPP1,VCAN,VEGFA	735 (25)
9,10-dimethyl-1,2-benzanthracene		chemical toxicant		0.61	0.000284	BIRC5,CDKN1A,CXCL3,CYP1A1,CYP1B1,EGFR,GADD45A,HBEGF,IL6,MRC1,NQO1,PTGS2,TGFA	732 (20)
melatonin		chemical - endogenous mammalian		-0.383	0.000286	BCL2,BMP2,BRCA1,CDKN1A,CXCL6,CYCS,DIO2,ECE1,EIF2AK3,FASN,GJA1,IL6,INSR,IRS1,IRS2,Mt1,NCAM1,NQO1,PLAT,PTGS2,SLC2A4,SPP1	704 (23)
p85 (pik3r)		group		0.871	0.000307	BCL2,FASN,IL6,MMP2,PPARG,PTGS2,VEGFA	684 (24)
GIP		other		1.636	0.000307	BCL2,Ccl2,Ccl7,IL6,LPL,RGS2,SPP1	578 (19)
PDGFRA	-1.045	kinase		0.493	0.000307	ACTA2,CDKN1A,COL1A1,DAB2,MYC,PDGFRA,PRKCQ	748 (25)
S1PR2	-0.635	G-protein coupled receptor		0.459	0.000307	ACTA2,Ccl2,CCL5,PTGS2,S1PR2,SPHK1,TIMP1	687 (20)
ethidium		chemical drug		-1.342	0.000307	BCL2,C1QTNF5,CCNB2,PCNA,PRC1,TIMP1,TIMP2	548 (10)
PPP2CA	-0.258	phosphatase		1.897	0.000307	AXIN1,Ccl2,CD36,CDKN1A,CFB,CXCL3,EIF4EBP1,MYC,PTGS2,RARB,SLAMF8,UPP1	656 (17)
KDR	2.774	kinase		1.698	0.000307	ANGPT2,Ccl2,EPHB3,FABP4,KDR,NDC80,NME1,PDCD1,PIM1,PTGS2,S1PR2,SFRP1	704 (24)
HNRNPK	-0.088	transcription regulator		1.077	0.000307	CDKN1A,IGSF10,IL2RG,ITGA6,MYC,NRXN2,PRELP,PTGS2,SPN,Tmsb4x (includes others),UCP2,VCAN	575 (14)
MRTFA		transcription regulator	Inhibited	-2.63	0.000311	ACTA2,ACTC1,CCL5,CDC42EP2,CLDN15,CNN1,CXCL6,CYFIP2,EYA2,FADS2,FLNA,G0S2,GP1BA,Ifitm1,ITGA6,LCN2,MMP16,MYH11,MYOCD,PGLYRP1,PGR,PRG2,PRSS57,SLC6A4,TNC	488 (11)
branched chain amino acids		chemical drug		1.48	0.000312	ACTA2,COL1A2,COL3A1,PCNA,TEK,TIMP1,TIMP2,VEGFA
OXT		other		1.496	0.000312	ACTC1,GATA4,GJA1,OXTR,PRKCZ,PTGS2,RCAN1,RGS2	813 (23)
LRPAP1	-0.144	other		0.122	0.000312	Ccl2,IL6,LPL,LRP1,MMP2,PTGS2,SERPINA3,SORL1	641 (21)
PLA2G6	-0.056	enzyme		0.853	0.000312	ALOX12,Ccl2,MRC1,NOX4,PPARG,PTGS2,RGS2,STIM1	578 (22)
PTAFR		G-protein coupled receptor		0.534	0.000312	BIRC5,EGFR,IL6,MCAM,MMP2,MYC,PTGS2,SNAI1	656 (20)
Am 580		chemical toxicant	Activated	2.086	0.000314	ADM,APOD,CD1D,CYP26B1,ITGA6,NTRK2,PLAT,RARB,RARG,TIMP1	488 (12)
Growth hormone		group		0.645	0.000319	ADRB2,ANGPTL4,BCL2,BMP2,CD36,CLDN15,COL1A1,COL3A1,DDR1,DLK1,EGFR,FABP4,FASN,FGFR3,FN1,FZD7,IGF1R,IGF2,IGFBP3,IGFBP5,IGFBP6,INSR,LEPR,LPL,MYC,NOX4,PCNA,PFKFB3,PLK2,PPARG,S100B,SPP1,STC1,TSC22D1,XDH,ZEB2	637 (20)
mitoxantrone		chemical drug		1.653	0.000319	ABCG2,CDKN1A,COL1A1,COL1A2,IFI16,IL6,KLK3,PERP,RSAD2,SFRP2,VEGFA	659 (21)
ethionine		chemical toxicant	Activated	3.317	0.000319	ANXA1,LAMC2,LCN2,LGALS3,MYC,S100A10,SPP1,TES,TIMP1,TSPAN8,UPP1
FOXL2		transcription regulator	Activated	3.157	0.000326	BID,BMP2,CH25H,CXCL3,CYP26B1,FST,GPRC5B,INHBA,NFATC2,PTGS2,PTHLH,RGS2,SMAD6,SOX4,SPRY1	437 (11)
SMARCA2	0.016	transcription regulator		-0.251	0.000326	ALPL,BCL2,BMPR1B,CD36,DES,DHFR,IGFBP5,IL6,KDR,KLK3,NME1,PPARG,RRM2,TUFT1,TYMS	588 (19)
mir-29		microRNA		0.502	0.000327	ACTA2,ADAM12,ADAMTS9,ANGPTL4,ARPC3,BCL2,COL1A1,COL3A1,ELN,FN1,LPL,MMP2,OLR1,PDGFRB,SFRP2,THBS1,VEGFA	733 (22)
DYSF	0.25	other			0.000327	ANXA1,Ccl7,CD68,CD74,Ctla2a/Ctla2b,FN1,GPR137B,IFI16,ITGB3,LCP1,LGALS3,MRC1,PDGFRA,PRSS23,S100A4,SERPINA3,TIMP1
Creb		group		-0.799	0.000334	AASS,ADM,ANK3,ANTXR1,APBA2,ATP2A2,BCL2,BMP6,CDKN1A,EPHA3,FOSL1,FSCN1,FXN,GIMAP8,Gimap9,GJA1,GJA5,HPGD,IFI16,IL6,INTS1,LTBP3,MCAM,MIF,MMP2,NRN1,NTS,PCNA,PCOLCE,PDE3B,PER1,PLAT,PPARG,PRKAA2,PSMC3IP,PTGS2,PTHLH,RET,RGS2,SKIL,SLIT2,SOX4,SYNPO,TRAIP,VEGFA,ZBP1	715 (26)
MAPK1	-0.355	kinase		0.744	0.000336	ADAM12,ATP1A2,AURKA,BCL2,BIRC5,CCL5,CCNB1,CDKN1A,CFB,DAB2,DUSP2,EGLN3,FN1,GNG2,GRB7,HBA1/HBA2,HDC,IFI16,IFITM3,IGFBP7,IL6,ITGB3,LAMA4,LGALS3,LMNA,MAST3,MKI67,MMP2,MMP28,MNS1,MYC,NRN1,NRP1,NUP188,PLA2G4F,PLA2G5,PLD1,PLXDC1,PTGS2,RGS16,RGS2,Serpina3g (includes others),SFRP2,SHCBP1,SNAI1,SPP1,SUN2,TRPC1,UBE2C,USP18	661 (18)
DNMT3A	-0.476	enzyme		-0.481	0.000336	ACE,ACTC1,ADCY5,ADCY7,EFEMP1,FOXF2,FURIN,GRINA,IRF5,IRS1,Mt1,NFATC2,PDE2A,PLA2G7,PPP1R3C,PRKAR2B,PTGS2,RCAN2,RGS16,SLIT2,SLIT3,SPP1,TWIST1	468 (13)
MYCN	-0.057	transcription regulator		1.9	0.000345	ABCA2,ABCB1,ABCB9,ABCG2,ALDH1A1,BID,BIRC5,CDH5,CDKN1A,CHPF2,CKAP4,COL1A1,COL4A1,CRIM1,DKK3,DPYSL3,DUSP2,EGFR,FGFR2,FN1,GATA4,GATA6,HMGA1,IGFBP7,INHBA,ITGA2,KLK3,MMP2,MRC2,NCAM1,NME1,RGS5,RPL12,RUSC2,S100A10,SDC2,SLC16A1,SLC16A7,SLIT3,SORD,TIMP2,ZEB2	660 (22)
enalapril		biologic drug		1.247	0.000349	ACE,ANGPT2,ASNS,FBLIM1,KDR,LCN2,LGALS3,MYC,PTH1R,PTHLH,SPP1,TIMP1,UCP2	728 (18)
PDLIM2	-0.129	other		0.75	0.000351	BCL2,BST1,CHPF,CRISPLD2,ENPP2,FSTL1,FXYD6,GNG2,HBEGF,IGFBP3,IL7,KCTD12,MME,RTN2,SMOC1,STC2,SV2A,TNS1,WWOX	285 (7)
FOXO4		transcription regulator		0.151	0.000351	CDH5,CDKN1A,CH25H,COL4A1,EDNRB,ELOVL6,FABP4,FABP5,FASN,FLT4,FMOD,FOXC1,GADD45A,IGFBP7,NRP2,PTPRB,S1PR3,SCD,VEGFA	541 (13)
BMP4	-0.253	growth factor		1.24	0.000363	ABCG2,ACTA2,BCL2,BMP2,CDH5,CDKN1A,CNN1,DIO2,EFNA1,EGFR,FGFR2,GJA1,HEY1,HOPX,IL6,KDR,LCP1,MYC,NCAM1,NOG,PAPPA2,PGF,POSTN,PPARG,PTCH1,RET,SMAD1,SMAD6,SMAD7,SNAI1,SPNS2,TBX3,VEGFA	631 (23)
ARNT2		transcription regulator		-0.229	0.000363	ANGPT2,ANGPTL4,BAG6,BST1,CMC4,CMKLR1,EGFR,EYA1,FKBP3,FNBP1,ICMT,IFI16,ITGB3,ITIH3,KLK3,LAMA2,LCP1,LDB2,NFATC2,NKX6-2,PDLIM4,PLA2G5,POSTN,RGS10,SELENBP1,SEMA5B,SMAD3,SYT7,THRB,Tnfsf9,TXNRD3,VEGFA,ZG16
palmitic acid		chemical - endogenous mammalian	Activated	3.045	0.000364	BCL2,C1QTNF9B,Ccl2,CCL5,CD36,CD68,CDKN1A,CXCL3,EGLN3,ELOVL6,EPHX2,FABP4,FASN,FN1,HTR2B,IL6,INHBA,INSR,IRS1,IRS2,LCN2,Mt1,Mt2,NCF2,NR4A2,OLR1,PNPLA3,PPARG,PTGS2,SCD,SLC2A4,SORT1,SPHK1,UCP2,VIPR2	818 (22)
KITLG	0.33	growth factor		1.353	0.000378	AXL,BCL2,BIK,BIRC5,BLVRB,BMP1,Ccl2,CD68,CDKN1A,CXCL3,EDNRB,EFNB2,EPOR,FABP5,FGFR1,GJA1,Hbb-b1,Ifi27l2a/Ifi27l2b,IGF1R,IGFBP3,IL6,ITGB3,KDR,KPNA2,LAPTM5,LTC4S,MAPK11,MME,MMP2,PIM1,PRKCQ,PTGS2,SAMSN1,STIM1,UCP2,UPF1	651 (19)
ciglitazone		chemical drug		1.961	0.000383	ACTA2,BCL2,Ccl2,CCL5,CD36,CDKN1A,FN1,IL6,KLK3,LCN2,MMP2,NOX4,OLR1,PPARG,PTGS2,RARB,TBXA2R	542 (22)
letrozole		chemical drug		-0.479	0.000383	AGR2,BCL2,CDKN1A,ERBB2,FOSL1,GJA1,MKI67,MYC,PGR	760 (26)
SPHK1	1.592	kinase		0.945	0.000383	ACTA2,Ccl2,CCL5,CDKN1A,COL1A2,FN1,IL33,IL6,PTGS2,SPHK1,TIMP1,TRAF1	615 (19)
N-acetylsphingosine		chemical reagent		1.628	0.000383	BCL2,BID,Ccl2,CDKN1A,COL1A1,COL1A2,COL3A1,EIF2AK3,HSD11B1,PDE3B,PTGS2,SPHK1	601 (18)
quercetin		chemical drug		-0.639	0.000389	ACPP,ARRDC4,BCL2,BIRC5,Ccl2,CYP1A1,EGFR,FASN,HMGCS2,HPSE,IL6,KLK3,LCN2,LEPR,LPL,MKI67,MYC,NFE2L1,PLAUR,PLD1,POR,PTGS2,SMAD7,TNFRSF11A,Tnfsf9	740 (21)
SYK		kinase		1.049	0.0004	AKAP12,ARID5A,BCL2,BMPR1B,CCL5,FGL2,FOSL1,FST,GADD45A,IL6,ITGB3,KLF2,NFATC2,PDCD1,PIM1,PRKAR2B,PRKCQ,PTPRE,TFPI2,TSC22D1,VEGFA	738 (17)
harmine		chemical - endogenous non-mammalian		-0.128	0.000403	BCL2,BMP2,CYP1A1,MMP2,PCNA,PTGS2	562 (11)
mir-373		microRNA		-1	0.000403	ANGPTL4,CSDC2,IL6,LATS2,PTHLH,RECK
HIF3A		transcription regulator		1.709	0.000403	EPAS1,Foxp2,PDGFRB,PLAUR,RARB,VEGFA	585 (13)
RLN2		other		-0.068	0.000403	ACTA2,CD36,EDNRB,MMP2,TIMP1,VEGFA	420 (17)
AIF1		other		-0.109	0.000403	ACTA2,CCNB1,COL1A1,COL3A1,IL6,PCNA	521 (11)
zoledronic acid		chemical drug		0.718	0.000407	BCL2,BID,FLT1,IL6,LPAR1,MMP2,NCAM1,NOX4,PTGS2,TNFRSF11A,VEGFA	637 (20)
propranolol		chemical drug	Activated	2.138	0.000407	ACE,ATP2A2,AXIN1,CYP1A1,DIO2,IL6,LEPR,MYC,PTGS2,Sik1,VEGFA	641 (17)
ANXA2	0.399	other		0.67	0.00041	CDKN1A,GADD45A,IGFBP3,IL6,MMP2,MYC,PTGS2,S100A10,ULK1,ULK2	652 (23)
KMT2D		transcription regulator		0.278	0.000413	ADCY5,CDCA7,CKAP4,CRIP1,CSPG4,DUSP2,EBF4,ECHDC2,FAH,FHL1,FOXQ1,GPRC5C,HDX,HOPX,IMMP2L,JAG2,LCK,LOXL1,MEOX1,METRNL,NUDT14,PPARG,RAB38,SH3BGRL2,SMAD6,SMO,SORD,STBD1,SYDE2,TCF15,TMEM159,ZNF23	248 (7)
nitrofurantoin		chemical drug	Activated	2.529	0.000421	ASNS,ASS1,CFI,CXCL3,DBI,ERBB2,GADD45A,HMGCS2,IGFBP3,IL6,ITIH4,LBP,LGALS3,LOX,Mt1,MYC,NQO1,PCNA,PLAT,S100A10,SELENBP1,SERPINA1,SLC27A2,SPP1,STMN1,TIMP1,TYMS,VEGFA
DCN	0.474	other	Activated	2.404	0.000427	BGN,CDKN1A,COL1A2,ERBB2,FST,IGF1R,IL6,IRS1,MMP2,SEMA3A,SMAD3,THBS1,VEGFA	453 (20)
salirasib		chemical drug		0.277	0.000427	ADM,AK4,CA9,COL5A1,PDGFRA,PDGFRB,PFKFB3,PLAT,PLOD2,STC1,TGFA,VEGFA,VEGFC	528 (7)
bazedoxifene		chemical drug		0	0.000437	BCL2,BIRC5,MKI67,MYC,PGR	723 (15)
bendamustine		chemical drug		-0.447	0.000437	AURKA,CCNB1,CDKN1A,EXO1,PLK1	468 (7)
TWIST		group		-1.387	0.000437	CDKN1A,CLCA2,ST3GAL2,ST3GAL5,THY1
RALBP1	-0.001	enzyme		0.447	0.000437	Ccl2,COL1A2,COL4A1,IL6,MMP2	573 (19)
WNT5B	1.607	other		-0.73	0.000437	ACTA2,COL1A1,FN1,PROX1,VCAN	352 (11)
ERP29	-0.034	transporter		-0.577	0.000437	PARD3,SCRIB,SNAI1,TWIST1,ZEB2
NELFA		other			0.000437	CCNB2,CDKN1A,CYP1B1,DLGAP5,TOP2A
calcium chloride		chemical drug		0.497	0.000437	ANKH,CD1D,MMP2,S100A4,STC1	264 (7)
Ro41-5253		chemical reagent		-0.686	0.000442	APOD,CDKN1A,FABP4,PLAT,PPARG,RARB,RARG,SMPD3	741 (27)
ilomastat		chemical drug		-0.322	0.000442	ACTA2,Ccl2,CCL5,CXCL3,EGFR,HBEGF,IL6,NGF	644 (23)
NR4A2	1.807	ligand-dependent nuclear receptor	Activated	2.232	0.000446	ADM,COL16A1,COL1A1,COL6A1,COL6A2,ETV1,FABP4,KCNMA1,NR4A2,PRKAA2,PTGS2,RARB,RET,SLC18A2,SLC2A4,SMAD3,ZBP1	519 (14)
DKK1		growth factor		0.124	0.000452	ACTA2,ANGPT2,BIRC5,BMP6,CDKN1A,COL1A1,KRT18,MYC,PPARG,SOST,TBX3,TCF4,TTYH1,TWIST1	614 (20)
TBP	0.058	transcription regulator			0.000461	ASNS,BCL2,CDKN1A,COL1A1,FN1,GATA4,IGF1R,IGF2,MEOX2,MYC,PPARG,PTGS2,RANBP1,TGFA,XDH	806 (23)
N-nitro-L-arginine methyl ester		chemical drug		-0.714	0.000464	ACE,ADM,BCL2,BGN,Ccl2,CD68,COL1A2,COL3A1,CXCL3,FN1,GJA1,IL6,INSIG1,ITGB3,OLR1,PERP,PTGS2,TIMP1,VEGFA	738 (20)
KLK4		peptidase			0.000465	CCNB1,CCNB2,CDKN1A,CDKN3,GADD45A,MKI67,PCNA
RNF20	0.03	enzyme		-0.816	0.000465	CDKN1A,HBA1/HBA2,HOXA10,Meis1,MYC,NR4A2,RHOB
AKR1B1	0.026	enzyme		-0.648	0.000465	BCL2,BIRC5,CDKN1A,FABP4,MKI67,MMP2,PPARG	576 (25)
lisinopril		biologic drug		1.195	0.000465	ACE,Ccl2,KDR,MMP2,PDGFRB,S100A6,VEGFA	334 (12)
SATB1		transcription regulator		0.017	0.000466	ACTN1,ADCY3,BCL2,CDKN1A,Cux1,EPAS1,ETS1,Foxp2,HVCN1,IL10RA,IL7,IRF8,KLF2,MAF,Meis1,NR4A2,PDCD1,PGR,PTGS2,SLC27A2,SMAD3,SUN2,TGFA,TMEM117,TRPS1,TSLP,TSPAN17,XAF1	626 (17)
miR-1-3p (and other miRNAs w/seed GGAAUGU)		mature microRNA		0.508	0.000469	ATP6V0A1,AXL,BCL2,Calm1 (includes others),CHSY1,EGFR,FBLN2,FSTL1,GJA1,IP6K2,IQGAP3,KCNJ2,LRP1,MRC2,NRP1,PGM2,PLEKHB2,POLA2,POLR2K,PREX1,SLC16A9,SLC44A1,SPHK1,SRXN1,SSNA1,SYNE1,THBS1,Tmsb4x (includes others),UHMK1,UNC93B1,UST
ADRA1D		G-protein coupled receptor			0.000475	CCNB1,CDK1,COL3A1,FABP5,FN1,IL6,LOX,NR4A2,PCNA,POLA2,TMPO,VEGFA	672 (21)
RB1	-0.618	transcription regulator	Inhibited	-2.656	0.000476	ACTC1,ALPL,ANGPT2,ASF1B,ATP1A1,AURKB,BCL2,BIRC5,BRCA1,CCNB1,CDCA5,CDK1,CDKN1A,CELSR1,CENPK,DHFR,DIO2,DLK1,DMPK,EPS8,FABP4,FBXO5,FLT1,FN1,FOSL1,FOXC2,FST,GPR157,GPR160,GPRC5C,HAUS1,HMGB2,IGF1R,IL6,KDR,KRT18,LCK,MAF,MMP2,MYC,NME1,PCNA,PIM1,PLK1,PPARG,PSEN2,RAD51,RAD51AP1,RAMP3,RANBP1,REEP1,RRM2,TMPO,TOB2,TYMS,ULK1,VEGFA,ZEB2	630 (21)
HMOX1	0.413	enzyme		-0.468	0.000479	ACTA2,ADORA2A,ANGPT2,AQP1,BCL2,Ccl2,CDKN1A,COL1A1,CXCL3,CYP1A1,FLT1,IL6,ITGB3,KDR,NQO1,NR4A2,PCNA,PTGS2,RELN,TEK,THBS1,THBS2,VEGFA	746 (20)
ROCK1	-0.085	kinase		-1.706	0.000513	CNN1,COL1A1,COL3A1,COL5A1,COL6A2,ETS1,FBLN2,LAMA2,LAMA4	457 (17)
SND1	-0.146	enzyme			0.000513	ALDH3A1,ANGPTL4,DHFR,EREG,ETV1,LAPTM5,LTBP1,PTGS2,SOX4
PRKAA		group		-0.682	0.000513	BCL2,BIRC5,Ccl2,CDKN1A,DUSP2,FASN,HSD11B1,HYOU1,IL6,NCF2,SNAI1	645 (23)
RCE1	0.188	peptidase			0.000513	Ccl2,CRIP1,FSTL1,GJA1,GPC4,HBEGF,LMNA,RCN1,SLIT3,TGFBI,THBS2	630 (10)
NKX2-5		transcription regulator		-0.572	0.000513	ACTA2,BCL2,DIO2,ECE1,GATA4,GJA1,GJA5,HOPX,IFI16,MYOCD,SCN5A	147 (6)
ibuprofen		chemical drug		-0.181	0.000513	CD36,EDNRB,EPAS1,IL6,LAMB1,MMP2,PPARG,PTGS2,RAC3,SERPINA3,VEGFA	391 (15)
ethanol		chemical - endogenous mammalian		1.932	0.000514	ACTA2,ADM,BCL2,BRCA1,CAMK4,Ccl2,CCL5,Ccl7,CD36,CDH13,CDKN1A,CENPA,COL1A2,COL3A1,CXCL3,EDNRB,EGFR,FAM72A,FASN,GADD45A,GNAI1,GPAM,GPM6A,GREM2,Gsta4,HEY1,IL6,MME,MMP2,MYC,NAPEPLD,NCF2,NQO1,Nrgn,NTRK2,PCNA,PDCD1,PLAT,PPARG,PPP1R3C,PTGS2,RHOB,SCD,SERPINA1,Sik1,SNAI1,SQLE,SRXN1,STIM1,SYNPO2,TFPI2,TIMP1,TIMP2	765 (19)
PI3K (family)		group		0.593	0.000515	ACTA2,ADM,BCL2,BIRC5,EGLN3,FASN,IL6,ITGA6,KLF2,MMP2,MYC,NQO1,PREX1,PRKCZ,PTGS2,RIPK3,SKIL,SOX4,THBS1,TNC,VEGFA	721 (20)
TEAD4	0.938	transcription regulator			0.000531	DES,FGFR1,FGFR2,FLT1,PLK2,RCAN1,SLC2A4,SMAD1,TEAD4,VEGFA	311 (7)
PLK1	1.151	kinase			0.000531	BOK,CDKN1A,EGFR,FBXO5,IFI16,MGMT,MYC,PLA2R1,PLK1,Ptprv	758 (25)
alvocidib		chemical drug		-0.484	0.000531	AEN,BCL2,BIRC5,CCNB1,CDKN1A,EGFR,ERBB2,PCNA,RHOBTB2,VEGFA	636 (23)
naringenin		chemical - endogenous non-mammalian		-0.895	0.000531	ACTA2,CCL5,COL1A1,COL3A1,CYP1A1,GJA1,LYN,PGR,PTGS2,TSLP	692 (23)
ACOX1	-0.426	enzyme		-1.444	0.000539	ACOT2,AIG1,CD36,CDKN1A,CSTB,CYP7B1,EGFR,FABP4,FAH,FASN,GADD45A,HSD11B1,LCN2,LGALS3,LPL,NR1H3,RGS2,RPL12,SELENBP1,SERPINA1,SLC16A1,SLC27A2,SLC4A4,SLCO2B1,UCP2	247 (9)
lovastatin		chemical drug		-0.955	0.000539	BCL2,BIRC5,CDKN1A,COTL1,FASN,FGFR1,GAP43,HBA1/HBA2,Hbb-b2,HELLS,IL6,INSRR,KLF2,LMNA,MKI67,MYC,NKX6-2,NOX4,PLAT,PTGS2,PTHLH,RHOB,SLC16A7,SMAD3,SV2A	729 (23)
SYVN1	-0.243	transporter		-1.225	0.000541	ASF1B,ATP1A1,ATP1B3,AXL,CDA,CSPG4,CYP1B1,DAB2,DAG1,DIO2,FASN,IGF1R,ITGA6,MCAM,OLR1,POLR2B,PTPRJ,SLC16A1,SLC27A3,SLC43A2,SLC6A6,SLC7A2,TRERF1,UNC13D
MYRF		transcription regulator		0.852	0.000545	4930486L24Rik,ARHGEF25,CASC4,Ces2e,CFI,GRB14,KLHL21,LOXL4,NRIP2,OTUD1,PLAUR,PTPRE,SLC22A4,TRAF5,ZNF362
CCN2		growth factor		-0.883	0.000561	ADAMTS4,ADAMTS5,BCL2,BIRC5,COL1A1,EGLN3,FN1,FZD2,HAPLN1,IGF2,IL6,LOX,LTBP3,MMP2,MYC,PTH1R,SFRP4,SOX4,TIMP1,VEGFA	758 (21)
ATF4	0.133	transcription regulator		1.859	0.00058	ABCG2,ASNS,CA9,CDKN1A,EIF4EBP1,FASN,FN1,GADD45A,HYOU1,IGFBP5,IGFBP7,IL6,LGALS3,NID2,NOX4,NR1H3,PEG3,PPARG,PSAT1,PTGS2,Ptprv,SLC1A4,SLC6A9,STC2,TNFRSF11A,VEGFA,XDH	741 (25)
ITGA5	-0.41	transmembrane receptor		-1.295	0.000584	BCL2,CDKN1A,CHRD,ENPP2,ERBB2,GAS1,GJA1,HOXB9,IGF2,IL6,MMP2,PLAUR	664 (18)
valsartan		chemical drug		-0.761	0.000584	ANGPT2,AQP1,Ccl2,COL1A1,FN1,GJA1,IL6,MMP2,POSTN,PTGS2,SPP1,TIMP1	681 (19)
salmonella minnesota R595 lipopolysaccharides		chemical - endogenous non-mammalian	Activated	2.862	0.000595	AXL,Ccl2,CCL5,Ccl6,Ccl7,CH25H,CXCL3,CXCL6,EDNRB,FOSL1,IL6,IRF8,LPAR1,MKI67,PTGS2,PTPRJ,RSAD2,SLC7A2,SLFN12L,Slfn2,Tnfsf9,TSC22D1	632 (19)
RBPJ	-0.39	transcription regulator		-0.634	0.000599	BMP2,CDCA7,CDKN1A,DTX1,ECT2,ETS1,FGF13,GNAI1,HEY1,HEY2,HMMR,IGF2,IL17RA,IL6,INHBA,IRF8,MYC,NGF,NRARP,PGF,PRKAR2A,SOX4,TNC,VEGFA,VEGFC	618 (21)
SCAP	-0.524	other		-1.239	0.000601	ASNS,DLK1,ELOVL6,FABP5,FADS2,FASN,GPAM,HMGCS2,INSIG1,LGALS3,Mt2,OLR1,PTGER4,PTGS2,SCD,SQLE,THRSP	624 (12)
PDGF-AA		complex		0.456	0.000614	ACTA2,CDK1,CDKN1A,EREG,HBEGF,IL6,PCNA,PDGFRA	661 (20)
SIX5	-0.534	transcription regulator		0.695	0.000614	ATP1A1,DMPK,FZD8,IGF2,IGFBP5,KRT18,PTN,SFRP2
poly rI:rC-RNA		biologic drug	Activated	4.19	0.000617	Abi3bp,ANXA1,ARID5A,AXL,BCL2,BMP2,Ccl2,CCL5,CD36,CD74,CFB,CHN1,CXCL3,CXCL6,DIO2,DUSP5,ELMOD2,ETNK1,FN1,FOSL1,GATM,HBEGF,HFE,IFI16,IFITM3,IGFBP6,IL10RA,IL2RG,IL33,IL6,INHBA,IRF5,LPL,LYN,MMP2,MRAS,MYC,NFIL3,NR4A2,OLR1,OMD,PEG3,PIM1,PLAUR,PRKAR1B,PRKCQ,PSEN2,PTGS2,PTPRJ,Retnla,RGS2,RSAD2,SLC26A4,SLFN12L,Slfn2,STON2,TFPI2,TGFA,THBS1,Tnfsf9,TRAF1,TSLP,USP18,VEGFA,VEGFC,ZBP1	507 (16)
MAP2K6	-0.022	kinase		-0.647	0.000626	ACTA2,ATP2A2,BCL2,BGN,Ccl2,CDKN1A,IL6,IRS1,IRS2,MMP2,MYH11,NPR1,PTGS2,PTH1R,RGS7,SLC2A4	683 (24)
leukotriene D4		chemical - endogenous mammalian	Activated	2.01	0.000626	ADAM12,APOLD1,BMP2,HBEGF,IL6,KCNJ2,KLF2,MAP3K8,NR4A2,PDGFRB,PTGS2,RCAN1,RGS2	649 (21)
miR-34a-5p (and other miRNAs w/seed GGCAGUG)		mature microRNA		-0.569	0.000626	AXL,BCL2,BIRC5,CDK1,CDKN1A,DHFR,DOCK8,MYC,PPARG,PTPRE,STIM1,TRPS1,VEGFA	629 (18)
pyridaben		chemical toxicant		1.437	0.000626	ADAM22,ATP8A2,CCL21,Hist1h2bh,INHBA,KCNMA1,KLF2,LAMC2,LRP4,PLCE1,STON2,STRBP,UTP14C
BNIP3L	0.097	other	Inhibited	-3.053	0.000626	ANK1,AURKA,Ccl2,CDKN3,CENPE,CENPF,CKAP2,GADD45A,PDGFRB,RRM2,SFRP1,TIMP2,TOP2A	465 (7)
Ccl2	4.113	cytokine	Activated	2	0.000626	Ccl2,CCL5,Ccl7,CXCL3,ETS1,FABP4,IL6,ITGB3,KDR,LPL,PPARG,SLC2A4,TBX3	685 (16)
PTGES		enzyme		0.378	0.000626	ANXA1,BIRC5,Ccl2,CDKN1A,CXCL3,FLT1,GATA4,IL6,ITGA6,MYC,PPARG,PTGS2,TRAF1	688 (22)
PPARD		ligand-dependent nuclear receptor		-0.512	0.000633	ACTA2,ADORA2A,ANGPTL4,BCL2,BIRC5,Ccl2,CD36,CD68,CDK1,FABP4,FASN,FLT1,FN1,GPAM,HMGCS2,IL6,LPL,LRP5,PCNA,Pcp4l1,PCSK6,POP4,PPARG,PTGS2,S100A6,SCD,SLC27A2,SLC2A4,SORD,ST3GAL5,STBD1,THBS1,UCP2,VEGFA	557 (15)
sulprostone		chemical drug			0.000633	PTGS2,THRSP,VEGFC
TFIIH		complex			0.000633	CDKN1A,COL6A1,PPARG	503 (13)
methylamphotericin B		chemical drug			0.000633	LCN2,SPP1,TIMP1
ADI PEG20		biologic drug			0.000633	ASS1,AXL,MYC	574 (11)
glucuronyl glucosamine glycan sulfate		chemical drug			0.000633	COL3A1,FN1,HSPG2	474 (16)
PURB	0.6	transcription regulator			0.000633	ACTA2,HTRA1,MYC
miR-520g-3p (and other miRNAs w/seed CAAAGUG)		mature microRNA			0.000633	ABCG2,SMAD6,VEGFA
MYH11	-1.534	other			0.000633	ACTA2,CNN1,MYH11
MED26	-0.15	transcription regulator			0.000633	ANKRD37,Hbb-b1,MYC
cetuximab/radiotherapy		biologic drug			0.000633	FLT1,KDR,TYMS
natamycin		chemical drug			0.000633	LCN2,SPP1,TIMP1
NFYC	0.061	transcription regulator			0.000642	CCNB1,CCNB2,CDCA8,COL1A1,COL1A2,FGFR2,NPR1,PDGFRB,RHOB,THRSP,TYMS	43 (2)
NFIB	-0.092	transcription regulator			0.000642	ADAMTSL4,BMP6,CYP4B1,EYA1,LOX,NCAM1,Pitpnc1,PLEKHF1,PVT1,STEAP4,TNS1
phenylephrine		chemical drug		1.203	0.000642	ATP2A2,COL3A1,DIO2,EDNRB,EGFR,FST,GJA1,MYC,PTGS2,RCAN1,RGS2,RGS4,SLC2A4,THRA,THRB	649 (21)
PRDM1		transcription regulator		-0.287	0.000651	ADA,ALPL,ANGPTL4,ATP9A,CA9,Ccl2,CD74,CRISPLD2,CXCL3,CXCL6,FOSL1,FZD2,GALNT2,Gsta4,IGF1R,IL6,IRF8,KHDRBS3,ME1,METTL7A,MYC,PCSK6,PDCD1,PLAC8,PROX1,RELN,RSAD2,SCARA5,SERPINA3,SLC16A5,SLCO2B1,SMAD3,SNAI1,TRIB1,TRIM65	646 (21)
octanoic acid		chemical - endogenous mammalian		-1	0.000654	CD36,FABP4,FASN,LPL,PPARG,TSLP	400 (7)
COL9A1	-1.901	other		1.561	0.000654	COMP,FMOD,FN1,HSPG2,TGFBI,THBS4
mir-322		microRNA		1.842	0.000654	BCL2,FGFR1,FN1,IGF1R,SMAD7,SMURF2
COX4I1	0.446	enzyme		1.706	0.000654	MMP16,POSTN,SFRP2,SLC24A3,SLC2A4,TSPAN8
PTPRE	1.613	phosphatase		0.816	0.000654	ACPP,Ccl7,CXCL3,INHBA,SLFN12L,TSC22D1
SAT1	0.22	enzyme		-0.156	0.000654	AMY2A,CDKN1A,DHFR,IGFBP3,LPL,PRKAA2	526 (7)
ADAM15	0.003	peptidase		-0.648	0.000654	CCL5,EGFR,FLT1,IL6,KDR,VEGFA	655 (23)
growth factor		group		1.342	0.000654	BCL2,FGFR1,KLF2,MYC,PTGS2,SPHK1	547 (19)
Rxr		group		0.57	0.000656	ANGPTL4,BCL2,CD36,CDKN1A,DLK1,EFNA5,FURIN,GADD45A,HBEGF,HR,IL6,INSIG1,INSR,MMP2,MYC,NR1H3,POR,PPARG,PTGS2,RARB,SPP1	630 (25)
SNAI1	1.557	transcription regulator		-1.686	0.000668	ACTN1,AXL,CDH5,CDKN1A,CLCA2,COL1A1,COL1A2,FASN,FLNA,FMNL2,FN1,FOSL1,FOXC2,HPGD,ITGA2,KRT18,PTGS2,SLC27A2,SNAI1,THY1,TWIST1,ZEB2	707 (23)
RPSA	0.133	translation regulator	Inhibited	-2.356	0.000677	CCL5,Ccl7,CXCL3,DUSP2,IL6,ITGA6,MMP2,PTGS2,TRAF1	679 (17)
lipoxin A4		chemical - endogenous mammalian		-0.448	0.000679	ACTA2,Ccl2,CDKN1A,CYP1A1,FN1,IL6,PGR,PTGS2,TIMP1,TIMP2	667 (23)
CASP1	-0.096	peptidase		-1	0.000679	ACTA2,Ccl2,COL1A1,FASN,IL6,KDR,PPARG,PTGS2,RIPK3,SCD	595 (16)
SS18	-0.147	transcription regulator		0	0.000679	EPHB3,FGFR2,GPR137B,IGF2,JAG2,METRNL,RET,SLC16A3,SYNE1,TLE3
CTBP1	-0.295	enzyme		-1.18	0.000679	BRCA1,CDKN1A,COL1A2,CYP26B1,ENPP2,FAT1,FSCN1,SMAD6,THBS1,VCAN
PTP4A3	-0.269	phosphatase		0.4	0.000682	CSK,FN1,IGF1R,ITGB3,MYC,SNAI1,STMN1	570 (20)
mir-214		microRNA		-0.873	0.000682	ALCAM,BIRC5,CADM1,FGFR1,IGF1R,PSMD10,PTGS2
NOX1		enzyme		-1.23	0.000682	EGFR,EPAS1,FLT1,KDR,SMAD7,TGFA,VEGFA	688 (20)
PDCD4	-0.226	other		-1.691	0.000682	IL6,LOX,MYC,PLAUR,PTGS2,SNAI1,VEGFC	694 (19)
vitamin K2		chemical drug		0.239	0.000682	ABCB1,COL6A1,GATA6,GPRC5B,MATN2,SERPINB1,SPP1
MAPK8	0.031	kinase		0.796	0.000686	ABCB1,APOD,AQP1,B4GALT1,BCL2,BMP2,Ccl2,CCL5,CDKN1A,COL1A1,CYP1A1,DIO2,ETS1,FOSL1,GADD45A,HIPK3,IL6,MIF,MMP2,MTHFR,MYC,NOX4,NRP1,PLAUR,PTCH1,PTGS2,RGS4,VEGFC	650 (20)
thioinosine		chemical toxicant			0.000707	CD36,LPL,NR1H3,PPARG
CCAR1	0.384	transcription regulator		1	0.000707	EPAS1,PPARG,RGS2,SPHK1
PPP1R14B	0.491	phosphatase		-1	0.000707	EPAS1,FLT1,KDR,VEGFA
DNAJA3	-0.03	other		-0.152	0.000707	BCL2,EGFR,ERBB2,VEGFA	632 (18)
EFEMP2	-0.299	other			0.000707	EFEMP1,ELN,FBLN2,FBLN5
STX2	0.33	transporter		-1	0.000707	BMP2,MMP2,MYC,SMAD7	625 (17)
SF1		transcription regulator		0.061	0.000707	ACTA2,CNN1,COL1A1,FN1
olmesartan medoxomil		chemical drug		0.152	0.000707	ACE,DHFR,IL6,PTGS2	691 (21)
dibenzoylmethane		chemical toxicant		-1.063	0.000707	CDKN1A,CYP1A1,CYP1B1,PTGS2	599 (19)
quinapril		chemical drug		-1.98	0.000707	ACE,ADM,Ccl2,PTHLH	277 (7)
BAPTA-AM		chemical reagent		-0.126	0.000714	CDKN1A,COL1A1,CYP1A1,FLT1,FN1,IL6,MMP16,MMP2,PTGS2,S100B,SLC2A4,TRPC3	686 (18)
GNA12	-0.405	enzyme		-0.28	0.000729	ACTA2,BAIAP2,BCL2,CNN1,EGFR,Gsta4,IRS1,ITGA6,MMP2,MYC,MYH11,PDGFRA,PTGS2,VAV2,VAV3,VEGFA	673 (22)
ASCL1		transcription regulator		1.591	0.000747	BIRC5,CACNA2D3,CDCA7,CDK1,CDKN1A,EPHB3,GADD45G,HEY2,Nrxn3,PCSK6,PDGFRA,PRKCQ,PROX1,Ptprd,RELN,RET,SEMA6B,THRB	212 (7)
FGF8		growth factor		0.99	0.000747	BMP2,CMTM3,CRIP1,CYCS,FGFR1,FGFR2,FGFR4,GBX2,LHX6,Meis1,MKI67,NOG,PCOLCE2,RASD1,SLC27A3,SPP1,THBS1,TSPYL5
YAP1	-0.58	transcription regulator		0.695	0.000751	ACTA2,AURKB,BIRC5,BMP2,BMPR1B,CD36,CDK1,CDKN1A,EGFR,FASN,FN1,HMGCS2,IGF1R,IGF2,LATS2,LPL,MYC,NDUFS8,NEK2,PLK1,PTGS2,RAD51,TEAD4	700 (24)
H2AFY	0.096	other		-0.653	0.000753	CD36,CDKN1A,ERBB2,ETS1,FASN,FN1,GADD45A,IRS1,LPL,PPARG,SLC2A4,TBX3,THRSP	504 (21)
RIPK2	0.1	kinase	Activated	3.392	0.000754	ARL5C,Ccl2,CCL5,CD36,CXCL3,FASN,IL33,IL6,MARCKSL1,NR1H3,RASGRP3,SCD,SLC2A6,TRAF1,TSLP	535 (19)
clopidogrel		chemical drug		1.807	0.000754	ASNS,COL1A1,COL5A1,DUSP2,EGFR,KLF15,LGR6,MYC,PSAT1,RASSF8,RGS16,SLC1A4,STC2,VEGFA,ZC3H8	424 (7)
maneb		chemical toxicant		1.648	0.000763	ADAM22,ATP8A2,CCL21,CYP1A1,Hist1h2bh,INHBA,KCNMA1,KLF2,LAMC2,LRP4,PLCE1,STON2,STRBP,UTP14C
PRMT5	0.071	enzyme		1.236	0.000796	CYCS,FABP4,FASN,GAS1,KLK3,MYC,NKX3-1,NME1,PPARG,SLC45A3,SMAD7	603 (26)
HDAC6	-0.037	transcription regulator		-0.666	0.000796	BCL2,BIRC5,COL1A1,CYP1A1,CYP1B1,GDF6,IL6,LTBP2,MYC,NOG,TGFBI	788 (21)
CXCL12	0.461	cytokine		1.135	0.000798	ACTA2,AXL,BCL2,BMP1,BMP2,BMP6,CCL5,CD36,CD9,COL1A1,DMPK,DNAAF4,EGFR,ERBB2,FLNA,FN1,HIPK3,IGFBP7,IL6,ITGB3,Ly6a (includes others),mir-24,MMP2,MYC,PCDH1,PGR,PKD1,PTGS2,THBS1,TIMP1,TNFRSF11A	625 (20)
ALKBH5	-0.556	enzyme			0.000799	ASB1,AXL,BLVRB,CELSR2,CHN1,DNAAF4,FGFR1,GJA1,IGF2,JAG2,RACGAP1,RGS2,SBF1,SLC4A2,STON1,TLE3,TMBIM6
MRTFB		transcription regulator		-1.066	0.000799	ACTA2,CCL5,CLDN15,CNN1,CXCL6,EYA2,FADS2,FLNA,G0S2,GP1BA,Ifitm1,ITGA6,LCN2,PGLYRP1,PRG2,PRSS57,SLC6A4
lithium		chemical drug		-1.407	0.000799	ADRA2A,ADRB2,ANK3,BCL2,CAMK4,CDKN1A,GNAI1,ICMT,IL6,mir-24,NCAM1,NPTX1,PTGS2,RET,SLC6A4,TCF7L2,THRB	700 (25)
O6-benzylguanine		chemical drug		-1.27	0.000812	CCNB1,CCNB2,CDKN1A,MGMT,MKI67	520 (12)
ANKRD17	-0.26	other	Activated	2.236	0.000812	ACPP,ARID5A,Ccl7,HBEGF,HDC
SMOC2	-0.734	other	Activated	2.236	0.000812	AURKB,CCNB1,CDK1,CENPF,SNAI1
Shc		group		-1.069	0.000812	BCL2,FABP4,LPL,MYC,PPARG	693 (25)
PRPF19	-0.656	enzyme		-0.391	0.000812	BRCA1,CDKN1A,GPAM,PLIN4,SCD
BMS-754807		chemical drug		-1.342	0.000812	BCL2,BIRC5,EGFR,ERBB2,MKI67	689 (18)
LDB1	-0.453	transcription regulator	Inhibited	-2.213	0.000812	CDH5,FRZB,NKX3-1,SFRP1,SFRP2
HOXB5	-0.441	transcription regulator		0.6	0.000812	ANGPT2,ITGB3,MMP2,PLAUR,RET
PA2G4	-0.059	transcription regulator		1.097	0.000812	AGR2,ERBB2,KLK3,PDPN,SLC43A1
WNT3		other		1.387	0.000812	CDKN1A,Foxp2,ITGA6,POSTN,PTGS2	475 (7)
CYBA	0.47	enzyme		-0.447	0.000812	CDKN1A,EPAS1,FN1,IL6,VEGFA	656 (22)
lapatinib		chemical drug		-0.277	0.000812	BIRC5,EREG,HBEGF,KLK3,PGR	799 (22)
astressin 2B		biologic drug		-1.948	0.000812	Ccl2,HPGD,KCNMA1,KCNMB1,VEGFA	522 (11)
propylthiouracil		chemical drug			0.000814	DIO2,DLK1,FADS1,FADS2,FMO3,IGF2,ITGA6,Ly6a (includes others),Meg3,MYH11,NNMT,NRP1,NTRK2,PCOLCE2,ROBO1,SERPINB1,SFRP2,THRA,THRSP,ULK2
STAT5B	-0.564	transcription regulator	Inhibited	-2.183	0.000818	ABCB1,ACOT11,ACTC1,ATP2A2,BAIAP2,BCL2,CCDC141,CDKN1A,CYP26B1,EBF1,EGFR,FBLN1,G0S2,GADD45A,Gsta4,IL6,MAF,ME1,MYC,NNMT,NOX4,NQO1,NR4A2,NRP2,OMD,Pcp4l1,PDZRN3,PIM1,PPP1R3C,PVT1,RAB19,RASD1,Retnla,SCARA5,SCD,SLC16A5,SUSD4,SYBU,THRSP,TNFRSF11A,TRAF1	768 (18)
FN1	-1.171	enzyme		0.525	0.000827	ACE,ACTA2,BCL2,BIRC5,CCL5,CDKN1A,COL1A1,CXCL3,EGFR,FLNA,FN1,GSK3A,IL6,IL7,IRS1,ITGB3,KCNH2,MMP2,MYC,PCNA,PDGFRA,PGR,PLAUR,RECK,SCRN1,SNAI1,SPP1,TCF4,THBS1,TIMP2,UBE2H,VAV2	690 (22)
SUZ12	-0.401	enzyme	Activated	2	0.00083	ANXA8/ANXA8L1,ATP2A2,CHRM3,EPHA1,GATA4,GATA6,HOXA10,HOXB6,HOXD10,IGFBP3,INSIG1,KIF2C,LAMC2,LGALS3,MMP2,MYC,NKX2-3,PGR,RARB,RBMS1,SNAI1,TBX3,UCHL3,UHMK1	380 (13)
Smad		complex		0.578	0.000835	ANGPTL4,CDKN1A,COL1A1,COL1A2,MYC,PTHLH,SMAD7,VEGFA	394 (11)
HAND1		transcription regulator		-0.378	0.000835	DBI,EFNB2,FABP4,FLT1,HEY1,KDR,NOTCH4,NRP1
miR-24-3p (and other miRNAs w/seed GGCUCAG)		mature microRNA		-1.234	0.000835	AURKB,BRCA1,CDK1,DHFR,FURIN,IL6,MYC,SMAD3
kaempferol		chemical toxicant		-1.71	0.000835	ABCG2,BCL2,BIRC5,CDK1,CDKN1A,CYP1A1,MMP2,PTGS2	694 (23)
YBX1	-0.412	transcription regulator	Activated	2.916	0.000853	ABCB1,ACTA2,Ccl2,CCL5,CDKN1A,COL1A1,COL1A2,EFEMP1,EGFR,FGFR1,IGFBP3,IRF5,MMP2,PTGS2,RELN,SNAI1,SPON1,STC2	639 (19)
MTDH	0.342	transcription regulator		-0.988	0.000859	BCL2,CDKN1A,HTRA1,ME1,MMP2,RAD18,RARB,TEK,TWIST1,TYMS	648 (21)
MBTD1	-0.051	other		-0.333	0.000859	ACOT2,ADAMTSL1,CCNB1,CXCL3,DUSP2,HBA1/HBA2,Hbb-b1,Pitpnc1,SOX4,TLCD2
GDF9		growth factor		-0.355	0.000859	HSPG2,INHBA,ITGA6,LOX,NRIP1,PCNA,PTGS2,SMAD6,SMAD7,VCAN	435 (11)
ADORA2B		G-protein coupled receptor		1.099	0.000859	BCL2,Ccl2,COL1A2,CXCL3,IL6,MRC1,PDE5A,SPP1,TIMP1,VEGFA	464 (15)
IGF1R	-0.664	transmembrane receptor		1.145	0.00087	ACTA2,BCL2,CAPG,CCL5,CD36,CD68,CDK1,CDKN1A,CKS2,COL1A1,COL3A1,COL4A1,CYCS,DES,DLK1,FASN,HTRA1,IGF1R,IGF2,IGFBP3,IGFBP5,IL6,IRS1,IRS2,Meg3,MYC,NME1,PLAT,PTGS2,RACGAP1,S100A4,SCARA5,SNAI1,SNCG,TGFBI,TWIST1,TYMS,VEGFA,VEGFC	727 (20)
LGALS1	0.372	other		0.829	0.000881	ACTA2,ADAMTS4,ANK3,Ccl2,CCNB1,CDKN1A,FN1,HBEGF,IL6,INSIG1,LGALS3,MAF,MMP2,PDCD1,PTCH1	646 (20)
SOX10		transcription regulator		0.849	0.000882	DAG1,EDNRB,GAS7,ITGA6,KCNB1,LAMB1,PTN,RET,SOD3
homocysteine		chemical - endogenous mammalian		0.538	0.000917	BCL2,Ccl2,CCL5,CDKN1A,CLDN5,DES,GADD45A,IL6,LPL,MMP2,MTHFR,OLR1,OXTR,PGF,PTGS2,TIMP1,VEGFA	557 (17)
NR1I3	0.007	ligand-dependent nuclear receptor	Activated	2.173	0.000918	ABCB1,ALDH1A1,CDKN1A,Ces2c,CYP7B1,EIF4EBP1,FAM107B,FASN,Gsta4,INSIG1,LRG1,Mt1,MYC,PDE3B,POR,RARB,RARRES1,SCD,STEAP4,THRSP	360 (7)
CD3		complex	Activated	2.708	0.000963	ACPP,ACTG2,ANXA1,APBA1,ATP8A2,BATF,BCL2,BIRC5,C1R,CCL5,CD5,CD74,CDK1,CENPF,CH25H,CKS2,CYCS,DUSP2,ELK3,ETS1,EXOSC8,FKBP3,FMO3,HELLS,HMCN1,IGFBP5,IGFBP6,IL2RG,IL6,IRF8,ITGB5,KCNK3,LCK,LCP1,LRP1,LTBP1,Ly6a (includes others),LYN,MAF,MAP3K8,MMP2,MMRN1,MYC,NFATC2,NME1,NME4,OGN,PAFAH1B3,PCNA,PDCD1,PDE6H,PLA2R1,POLR2B,POLR2K,PPARG,PRKACA,PTGER4,PTGS2,PTPRJ,SMO,SORL1,STIM1,STMN1,SYNPO,SYT7,TFPI2,THBS1,THY…	727 (20)
RORC	-0.215	ligand-dependent nuclear receptor			0.00097	ACOT2,ASNS,B3GALT1,CCL5,CCNB1,CD36,CXCL3,CYP7B1,ELOVL6,HPGD,IL17RA,IL6,KCNK5,LCN2,Mt1,Mt2,NNMT,POR,PPP1R3C,SELENBP1,SLC16A7,SLC2A13,SLC7A2,SULF2,UBE2O,VEGFA	571 (13)
FOLR1		transporter			0.000972	ADA,AOC3,CD9,CENPK,CLCA1,GPAM,HOXB9,LAMB2,LPAR1,MRPS6,PVT1,S100A4,SHCBP1,SMC2,SORD,ST3GAL6,TNFRSF11A,TYMS
GPD1	0.032	enzyme			0.000972	ACOT2,ALPL,ASNS,CD36,CLCA1,CYP7B1,EGFR,ELOVL6,FMO3,GADD45A,LHX6,NQO1,PFKFB3,PSAT1,RARRES1,SERPINA3,SERPINB1,SUSD4
ERVW-1		other		0.692	0.000972	CCL5,CDCA8,CDKN1A,CREB3L1,IL6,LATS2,SLC1A4
RFX1	-0.53	transcription regulator			0.000972	COL1A1,COL1A2,DCDC2,DNAAF4,LMNA,MYC,PCNA
PIK3R1	0.146	kinase		0.386	0.000976	ATP1A1,BCL2,CD36,COL1A2,IL6,MKI67,MMP2,MYC,NFE2L1,PDGFRA,PDGFRB,PIK3R2,PPARG,PTGS2,VEGFA,VEGFC	657 (18)
SREBF2	-0.451	transcription regulator		0.475	0.000976	CDKN1A,CYP7B1,DBI,ELOVL6,FABP5,FADS2,FASN,INSIG1,IRS2,LRP1,PPARG,PTCH1,SCD,SQLE,THRSP,TIFA	698 (22)
fenretinide		chemical drug		-0.981	0.000976	ATP1B2,BCL2,BID,ENAH,IGFBP7,IL6,MGMT,MKI67,MYC,NCF2,PRKAR2A,PTGS2,RARB,RARG,TRAF1,VEGFA	624 (17)
imatinib		chemical drug		0.748	0.000993	ABL1,ATP1A2,ATP1B2,ATP1B3,ATP2B1,AURKA,BCL2,BCR,BIRC5,BMP2,BRCA1,CCNB1,CDKN1A,COL1A1,COL3A1,DAB2,DBF4,ECT2,EIF2AK3,EPAS1,FAIM,FN1,GADD45A,HBA1/HBA2,HYOU1,IL6,IL7,IP6K2,KDR,LYN,MKNK2,MME,MYC,NDUFA8,NDUFC2,NFE2L1,NQO1,NR2F2,PCNA,PIK3R2,PIM1,PLK1,RAD51,VEGFA	695 (25)
PSEN2	1.065	peptidase		-1.139	0.00101	ATP2A2,BCL2,CD74,CD9,EGFR,ENPP2,FZD4,GJA1,HBA1/HBA2,Hbb-b1,IGF1R,INSR,NDUFS8,PDGFRA,PDGFRB,PRC1,PSEN2,PTGS2,THY1	704 (23)
FNDC5		other		0.928	0.00101	ALPL,COL1A1,FABP4,LRP5,SOST,SPP1	325 (7)
IGFBP7	-1.037	transporter		0.816	0.00101	ASNS,CDKN1A,MMP2,MYC,PCNA,PTGS2	639 (22)
RXFP2		G-protein coupled receptor	Inhibited	-2.449	0.00101	CDH5,FZD7,HR,LRP1,LRP5,NOTCH4
NREP		other		-0.928	0.00101	ACTA2,COL3A1,MMP2,PDGFRA,PDGFRB,VEGFA	230 (7)
PLAGL1	-0.23	transcription regulator		0.871	0.00101	ANGPTL4,CDKN1A,FABP4,PPARG,SLC2A4,SORD	254 (7)
Z-551		chemical reagent		-0.51	0.00101	Ccl2,CD36,CD68,FASN,LPL,UCP2	320 (7)
RXRB	-0.058	ligand-dependent nuclear receptor			0.00103	ALDH1A1,FABP4,FASN,FGFR1,FLRT3,FSTL1,HBEGF,IGFBP6,LCN2,MMP2,S100A4,SPP1,THRSP,TSLP,VCAN	573 (20)
PTHLH	1.674	other		-0.582	0.00103	BCL2,BMPR1A,Ccl2,CDK1,CDKN1A,EFNB2,FN1,HAPLN1,IL6,ITGA6,PTGS2,RGS2,SMPD3,TNC,VEGFA	705 (21)
E2F2	0.068	transcription regulator		0.176	0.00103	AMY2B,BCL2,BIRC5,CCNB1,CCNB2,CDK1,CDKN1A,DHFR,ECE1,FGFR2,IL6,MYC,PCNA,RAD51,RRM2	518 (12)
LEF1		transcription regulator		0.858	0.00106	BCL2,BIRC5,CD1D,CDKN1A,FN1,LCK,LHX6,MMP2,MYC,NCAM1,NRCAM,PTCH1,PTGS2,SPP1	668 (25)
TSH		complex		0.543	0.00106	CDKN1A,DAG1,FZD1,GNAI1,IGFBP3,IGFBP5,IL6,INSR,KDR,LRP5,Mt1,MYC,NOX4,SLC2A4	763 (22)
metribolone		chemical reagent		0.321	0.00107	ACPP,ACTN1,AGR2,AKAP12,ANKH,BCL2,BMPR1B,BUB1,C1orf116,CDKN1A,CREB3L4,ETV1,FASN,FGFRL1,GADD45G,GTSE1,IGF1R,IGFBP5,IL6,INPP4B,ITGA6,KLK3,KRT18,MAF,MMP2,MYC,NDUFA8,NDUFC2,NDUFS8,NKX3-1,NNMT,RGMA,SMAD3,SORD,SPON2,THBS1,TIMP2,TRIM36,TRPS1,TSC22D1,TWIST1,VCAN,VEGFA	842 (20)
CSF3		cytokine		1.265	0.00109	ARHGEF10,BATF,BCL2,BIRC5,CAPG,Ccl2,CCL5,CXCL3,DES,ENPP2,ETS1,GADD45A,GADD45G,GATA4,GJA1,HDC,IL6,IL7,LBP,LCN2,Ly6a (includes others),LY96,MMP2,MYC,NFIL3,PIM1,PPARG,VEGFA	642 (18)
NFE2L2	0.062	transcription regulator		-0.815	0.00109	ABCG2,ALDH3A1,ATP1A1,ATP6V0D2,BCL2,BRCA1,Calm1 (includes others),Ccl2,CCL5,CD36,CDKN1A,COL1A1,COL3A1,CXCL3,CXCL6,DYNLL1,ELN,EMCN,ENTPD5,EPAS1,FABP4,FGF13,FMO1,FN1,GADD45G,GNA14,Gsta4,GSTO1,HYOU1,IL6,KLK3,LMNA,LPL,ME1,MKRN3,MST1R,Mt1,NCF2,NFE2L1,NQO1,OSGIN1,PPARG,PSAT1,PTGS2,PTPRB,Ptprd,RELN,RGS11,SERPINA3,SLC1A4,SLC6A9,SOD3,SRXN1,THRSP,TUB,VEGFA	680 (23)
diazoxide		chemical drug		1.23	0.00112	ABCC9,BCL2,CYCS,FASN,HYOU1,LPL,MYC,UCP2	806 (23)
wortmannin		chemical - kinase inhibitor		0.309	0.00112	ACTA2,BCL2,BIRC5,Ccl2,CCL5,CD36,CDKN1A,COL1A1,COL1A2,COL3A1,FASN,FN1,FOXC2,GAP43,HAPLN1,IGF1R,IL6,INSR,IRF8,IRS1,IRS2,MAF,MMP2,MYC,MYH11,PCNA,PGR,POSTN,PTGS2,SAMSN1,VEGFA	609 (18)
R5020		chemical reagent		0.714	0.00112	CDKN1A,DUSP5,EGFR,ERBB2,HBEGF,IRS2,LAMC2,MYC,NCOA1,PGR,RARG,RASD1,RGS2,TIMP2,TK1,VIPR1	626 (21)
IL15	-0.214	cytokine		1.612	0.00113	ACTG2,ANXA1,APBA1,BCL2,Ccl2,CCL5,CD5,CD74,CDKN1A,CKS2,CMKLR1,DUSP5,ELK3,ERBB2,ETS1,EXOSC8,FMO3,GALM,HMCN1,IGF1R,IL2RG,IL6,ITGB5,KLF2,LCK,LYN,MAF,MIF,MKI67,MYC,NCAM1,NME1,NME4,OGN,PAFAH1B3,PCNA,PDCD1,PFKFB3,PGM2,PIK3R2,PIM1,PLD1,POLR2K,PRKACA,PTPRJ,RGS16,SLC16A1,SLC16A3,SMAD3,SMAD7,SORL1,SPN,SYNPO,TIMP1,TOP2A,UPP1,VEGFA	641 (16)
ARRB2	0.123	other		-0.378	0.00114	ADRA2A,ADRB2,Ccl2,CXCL3,IL6,MMP2,MYC,PTGS2,VEGFA	468 (19)
TRAF3IP2	-0.225	other		1.682	0.00119	ACE,Ccl2,CCL21,CCL5,Ccl7,COL1A1,COL3A1,CXCL3,CXCL6,IL33,IL6,LCN2,MMP2,POSTN,STEAP4	681 (17)
LPL	1.691	enzyme		1.55	0.0012	BCL2,CD36,FABP4,IL6,IRS1,IRS2,LPL,PPARG,SLC2A4,THBS1,VEGFA	724 (22)
methylmercury		chemical toxicant		1.069	0.00124	ARHGAP18,COL1A1,COL3A1,CYP1A1,ECE1,IGFBP3,IL13RA1,IL6,MAPKAPK2,Mt1,PLD1,PTH1R,RHOB,SLC16A1	599 (18)
caffeine		chemical drug		1.507	0.00124	ADORA2A,BCL2,CDK1,CDKN1A,CUL7,EGFR,EPAS1,FASN,LRP1,NTRK2,PPARG,PTGS2,SNAI1,THBS1	652 (21)
SIM1		transcription regulator		-0.058	0.00124	ANGPT2,ANGPTL4,BAG6,BST1,CMC4,CMKLR1,EGFR,EYA1,FKBP3,FNBP1,ICMT,IFI16,ITGB3,ITIH3,KLK3,LAMA2,LCP1,LDB2,NFATC2,NKX6-2,PDLIM4,PLA2G5,POSTN,RGS10,SELENBP1,SEMA5B,SMAD3,SYT7,THRB,Tnfsf9,TXNRD3,ZG16
FAS	0.019	transmembrane receptor	Activated	2.825	0.00124	ACTA2,ARL4A,BCL2,BGN,BID,BIRC5,Ccl2,CCL5,CD1D,CDC42EP2,CDKN1A,COL1A1,COL1A2,COL3A1,COL4A1,COL5A1,COL6A1,COL6A3,CSNK1G2,CXCL3,CXCL6,EFNA1,EPOR,FGL2,FLT1,FSCN1,GADD45G,IL10RA,IL13RA1,IL17RA,IL6,ITGA7,LGALS3,LY75,MIF,MME,MPZL1,NFKBIE,NR4A2,PGLYRP1,PLD1,PPP1R3D,PTGER4,RSAD2,SKIL,SORL1,SPP1,TNC,TRIB1,VEGFA	574 (14)
SLC25A13	0.462	transporter			0.00125	ACOT2,ALPL,ASNS,CD36,CLCA1,CYP7B1,EGFR,ELOVL6,FMO3,GADD45A,LHX6,NQO1,PFKFB3,PSAT1,RARRES1,SERPINA3,SERPINB1,SUSD4
bezafibrate		chemical drug	Activated	2.365	0.00125	ACOT2,ANGPTL4,CCNB1,CD36,DBI,DLK1,FABP4,FASN,INSIG1,LGALS3,MGMT,NR1H3,PCNA,PPARG,PTGS2,SCD,SLC27A2,UCP2	451 (15)
FST	1.284	other		1.072	0.00126	ATP1A2,CD36,CYCS,FABP4,FN1,FST,IL6,MMP2,PPARG,SERPINA1,SMAD7,THRSP	773 (24)
Ap1		complex		1.262	0.00129	ACE,CCL5,CHRD,ETS1,FABP4,FN1,FOSL1,HPGD,IGFBP3,IL6,ITGA2,KLK3,KRT18,LPL,MMP2,MYC,NGF,NOG,NOTCH4,NQO1,PTGS2,S100A4,SNCG,TIMP1,TSLP,VEGFA	762 (23)
RELA	-0.196	transcription regulator		1.719	0.00129	ABCB1,ABCG2,ACTA2,ADAMTS5,ALCAM,BCL2,BIRC5,BMP2,CBS/CBSL,Ccl2,CCL5,CDKN1A,CFB,COL1A1,COL1A2,CXCL3,CXCL6,CYP1A1,DIO2,ELN,EPAS1,ERBB2,FN1,FSCN1,IGF1R,IL6,KRT18,LTC4S,LYN,MGMT,MIF,MST1R,MYC,NFKBIE,NOD2,NR4A2,OLR1,PLD1,PLK1,PPARG,PTGS2,S100A6,SBF1,Serpina3g (includes others),SLC2A4,SMAD7,SMOC2,SNAI1,STIM1,TFPI2,TRAF1,TSLP,TWIST1,UBE2H,VEGFA,ZDHHC8	686 (15)
TGFA	-0.677	growth factor		0.914	0.00129	BIRC5,CCL5,CDKN1A,EGFR,EREG,IL6,LAMC2,LCN2,NR4A2,PLA2G5,PLAT,PTGS2,S100A10,SERPINA1,TGFA,VEGFA	685 (16)
fluvastatin		chemical drug		0.188	0.00134	BCL2,CD9,CDKN1A,DCLK1,IL6,LRP1,PLAT,PTGIS,PTGS2,VEGFA	751 (23)
pristane		chemical toxicant	Activated	2.63	0.00134	Ccl2,CCL21,CCL5,FN1,IFI16,IL6,IRF5,IRF8,Ly6a (includes others),PTGS2	636 (18)
mir-26		microRNA		-1.339	0.00135	BCL2,CDKN3,CXCL3,HPGD,PTGS2,RPS6KA2,SMAD1	418 (7)
CYP2J2	0.295	enzyme		-1.727	0.00135	BCL2,Ccl2,CXCL6,EGFR,IL6,NME1,PPARG	649 (22)
HMGA2		enzyme		-0.152	0.00135	HOXD9,IGF2BP2,KLF15,LPL,SNAI1,SPP1,TWIST1
PCDH11Y		other		1.254	0.00135	AXIN1,FOSL1,GJA1,MYC,PTGS2,RET,SFRP2	475 (7)
TUG1		other		-0.75	0.00135	BCL2,Ccl2,CYCS,IL6,KLF2,MYC,NGF	247 (7)
potassium chloride		chemical drug		-0.574	0.00137	AATK,AMIGO2,ATP1A1,ATP2B1,Ccl2,CDK1,EIF2AK3,FGFR2,IGFBP5,MYC,MYOCD,NPTX1,NR4A2,NTRK2,PTGS2,SPP1,UNC5B	681 (19)
U46619		chemical reagent		1.199	0.00138	CCNB1,CDK1,INSR,NOX4,TIMP2	462 (11)
T 0070907		chemical reagent		-1.432	0.00138	Ccl2,CDKN1A,COL1A1,COL1A2,PTGS2	323 (12)
E2F8		transcription regulator			0.00138	CCNB1,CDK1,ECT2,KIF23,RACGAP1
TCF/LEF		group		0.651	0.00138	BIRC5,FN1,MMP2,MYC,PTGS2
vismodegib		chemical drug		0.447	0.00138	BCL2,CCL21,MKI67,PTCH1,VEGFA	202 (6)
TCF21		transcription regulator		-0.489	0.00138	CDKN1A,COL4A1,IL6,MMP2,TIMP1
PARP2	0.347	enzyme		1.231	0.00138	CD36,FABP4,FASN,LPL,PPARG	563 (12)
RFX2	0.227	transcription regulator			0.00138	COL1A2,DCDC2,DNAAF4,LMNA,MYC
CELF1		translation regulator			0.00138	CCNB1,CDKN1A,DMPK,INSR,RCAN1	663 (20)
Ncoa6	-0.243	transcription regulator			0.00138	FABP4,FASN,LPL,SCD,TGFA	379 (14)
zeaxanthin		chemical drug		1	0.00138	HAS3,MMP2,PRKAA2,SPON2,TIMP1
Calcineurin A		group		-1.51	0.00144	ATP2A2,COL1A1,COL1A2,COL3A1,GJA1,INSR,SCN5A,SLC2A4,TIMP1	562 (18)
Fgf		group		0.113	0.00144	ACE,GNL3,IGF1R,IL6,KDR,LPCAT1,MMP2,PER1,PTGS2	620 (18)
MMP14	0.289	peptidase		-1.006	0.00144	CCL5,CDKN1A,CSPG4,GAP43,IL6,LRP1,PTGS2,SNRPB2,VEGFA	429 (17)
ALOX15		enzyme		0.457	0.00144	BCL2,Ccl2,CD36,FN1,FOSL1,IL6,MMP2,PPARG,RGS2	720 (25)
DIO2	-1.008	enzyme		-1.706	0.00144	ATP2A2,Cbr2,COL6A1,HAPLN1,HCN2,HR,MARCKSL1,SCUBE1,SYCE2	94 (5)
FOXP3	0.331	transcription regulator		0.768	0.00144	ANXA1,BCL2,BRCA1,CDKN1A,ERBB2,FGL2,IL17RA,IL6,LATS2,MAF,MMP2,NFIL3,NPR1,NRN1,NRP1,NTRK3,PDE3B,SMAD7,VEGFA	649 (20)
SB-431542		chemical reagent		0.482	0.00144	ATP1A2,BGN,BMP6,Ccl2,Ccl7,CHRM3,COL1A1,FN1,FST,GJA1,IGFBP7,KRT18,MMP2,MYC,S1PR3,SMAD1,SMAD6,SMAD7,SPP1	550 (21)
AMPK		complex		-0.506	0.00145	ACE,BCL2,BIRC5,BMP2,Ccl2,CCNB1,CDKN1A,FASN,FSCN1,GJA1,IL6,KCNB1,NOX4,PFKFB3,PPARG,PTGS2,SLC2A4,SNAI1,STIM1,THRSP,UCP2	640 (23)
VitaminD3-VDR-RXR		complex		1.353	0.00145	CCL5,CDKN1A,COL13A1,GADD45A,HOXA10,IGFBP3,IGFBP5,IGFBP6,LRP5,SERPINB1,SPP1
STK40	-0.605	kinase			0.00145	ABCB1,Ccl2,DES,DLK1,FABP4,PDPN,PPARG,PTGS2,ST8SIA6,TXNRD3,WNT2	400 (12)
CCNC	0.133	other		0.013	0.00147	CD36,FABP4,FASN,LPL,PPARG,SCD,SLC2A4,TYMS	238 (9)
MBD3	0.04	other			0.00148	ACTC1,AXIN1,DIXDC1,EFNA5,FOSL1,FZD1,FZD4,FZD7,HTRA1,LRP5,Mt1,MYC,PEG3,SCD,SFRP1,SFRP2	444 (7)
phytohemagglutinin		chemical drug		0.726	0.00149	BCR,CACNB2,CAP2,CCL5,CHN1,COL1A2,COL4A5,FGFR3,GAB2,GNAI1,HPGD,IL2RG,IL6,ITGA8,ITGB3,ITIH4,KCNMB1,KIF23,KLF2,LAMA2,LAMB2,LBP,NCAM1,NME1,NRIP1,PARD3,PCNA,PGF,PLD1,PLK1,PTPRJ,RARB,SOX4,SPHK1,SPP1,TIMP1,TMPO,TRAF1,TRAF5,TYMS,VGLL4,VIPR1	645 (17)
IL1R1	0.036	transmembrane receptor		0.077	0.00149	ACTA2,Ccl2,CCL5,Ccl7,CXCL3,IL6,LBP,MMP2,MYH11,PTGS2,S100B,TIMP1,TRAF1	687 (21)
CDK9	0.122	kinase	Activated	2.4	0.0015	ANKRD37,CCL5,CCNB1,CDKN1A,COL1A1,HIST1H2BD,IL6,MYC,PPARG,STC2,Tmsb4x (includes others),UHMK1	746 (25)
AKT2	-0.566	kinase		-1.093	0.0015	ACTA2,BCL2,BUB1,Ccl2,CDKN1A,IGF1R,IGF2,MYH11,NQO1,PPARG,SPRY1,TIMP1	666 (21)
MMP1		peptidase		1.296	0.0015	BCL2,BRCA1,CDKN1A,ERBB2,FGFR2,FN1,KDR,MYC,MYOCD,PTGS2,S100A4,TEK	612 (20)
azoxymethane		chemical toxicant		-0.02	0.0015	ACE,BCL2,CDKN1A,CXCL3,CXCL6,IGF1R,IGFBP3,IL6,MYC,PCNA,PRKCZ,PTGS2	708 (22)
E2F7	0.541	transcription regulator			0.0015	CCNB1,CDK1,DHFR,ECT2,KIF23,RACGAP1
mir-101		microRNA		-0.928	0.0015	CLDN5,COL1A1,COL3A1,NFATC2,PTGS2,STMN1	235 (7)
DDR1	-1.034	kinase		1.331	0.0015	Ccl2,CDKN1A,COL1A1,COL3A1,ELN,MMP2	640 (17)
10-nitrooleate		chemical - endogenous mammalian		-0.816	0.0015	Ccl2,IL6,NOX4,PPARG,PTGS2,TSLP
DDX17	0.193	enzyme		0.937	0.0015	CDKN1A,FOSL1,HTRA1,LCN2,MYC,S100A4	586 (7)
DSP	-0.878	other		-0.128	0.0015	Ccl2,COL1A1,COL1A2,COL3A1,LPL,PPARG
PCYT2	0.206	enzyme		-0.128	0.0015	CD36,FASN,GPAM,NR1H3,PPARG,SCD	127 (4)
CBX3	-0.345	transcription regulator			0.0015	BIRC5,CDK1,CDKN1A,ITGA7,MYC,PLK1
Cux1	-0.588	transcription regulator			0.0015	CCL5,Ccl7,DAB2,DKK2,DPYSL3,HTRA1
RHOB	-0.716	enzyme		1.698	0.0015	CDKN1A,EGFR,IL6,ITGB3,PTGS2,RHOB	701 (21)
Go6983		chemical - kinase inhibitor	Inhibited	-2.425	0.0015	CD36,FLT1,PPARG,PTGS2,SNAI1,TRAF1	657 (23)
myricetin		chemical - endogenous non-mammalian		-1.406	0.0015	BCL2,CYP1A1,IL6,MYC,PTGS2,SLC16A1	649 (20)
triolein		chemical drug			0.00154	FADS1,FADS2,FASN,THRSP
MED28	0.397	other		0.883	0.00154	ACTA2,ACTG2,CRIP1,MYH11
ganetespib		chemical drug			0.00154	BCL2,CDK1,EGFR,MYC	650 (21)
TNKS	-0.609	enzyme		0.218	0.00154	AXIN1,MYC,SLC2A4,SORT1	518 (7)
4-coumaric acid		chemical - endogenous mammalian			0.00154	CCNB1,CDKN1A,MYC,PTGS2	399 (7)
butylidenephthalide		chemical reagent		1.03	0.00154	AXL,MMP2,SNAI1,TWIST1	324 (7)
sanguinarine		chemical - endogenous non-mammalian			0.00154	BIRC5,NQO1,TIMP1,TIMP2	465 (11)
Jnk		group		1.063	0.00157	ACTA2,BIRC5,BRCA1,Ccl2,CCL5,COL1A1,COL3A1,CXCL3,CXCL6,ETS1,FABP4,FN1,GADD45A,GAP43,GJA1,IL6,MMP2,MRC1,MRC2,MYC,NOX4,NQO1,PLAT,PLAUR,POSTN,PTGS2,RAD51,RARG,TIMP1,TRPC3,TWIST1,VCAN	658 (21)
IL3		cytokine		-0.075	0.00159	ABCA2,ADA,APBA2,BCL2,BMP2,Calm1 (includes others),Ccl6,CDKN1A,CLEC11A,DOK2,FASN,FGFR1,FGFR4,FKBP3,GADD45A,GADD45G,GP1BA,HBA1/HBA2,HBEGF,IL33,IL6,ITGB3,LATS2,LCN2,LY75,LYN,Mt1,MYC,NKX2-3,NRP1,PAPPA2,PDPN,PIM1,PLA2G7,PRG2,PROX1,RANBP1,SERPINA3,Serpina3g (includes others),SOX4,SOX5,TK1,TNFRSF11A,UCP2,VAV2,VEGFA	625 (23)
ARNT	-0.549	transcription regulator		0.043	0.00161	ADM,ALDH3A1,ANGPTL4,BCL2,CA9,CYP1A1,CYP1B1,DNAJC2,EPAS1,FLT1,FURIN,GAS1,INSR,IRS2,ITGB3,NQO1,PGM2,RANBP1,RGS5,UBE2C,VEGFA	604 (17)
celecoxib		chemical drug		-0.199	0.00161	ABCG2,BCL2,BIRC5,CD68,CDKN1A,CENPF,DES,GADD45A,IGF1R,IL7,KDR,MKI67,MMP2,PCNA,PPARG,PTGS2,RARB,TNFRSF11A,TRAF1,TRAIP,VEGFC	611 (21)
MEN1	-0.06	transcription regulator		0.655	0.00165	CCNB2,CDKN1A,FABP4,FOXC1,FOXC2,GAS1,IRS2,Meis1,PTN,PTPRZ1	756 (26)
mir-30		microRNA		-1.83	0.00165	ADAM12,Ccl2,CDKN1A,GADD45A,IL6,ITGA2,ITGB3,RAB38,SMAD1,SNAI1	708 (16)
CEACAM1	-0.12	transporter		-0.863	0.00165	ALDH1A1,ANGPT2,CXCL6,HEY1,IGF1R,IL2RG,KDR,TEK,VEGFA,VEGFC	601 (18)
PTGS1	-0.416	enzyme		0.356	0.00165	ANGPT2,Ccl2,FABP4,IL6,MMP2,OXTR,PTGER4,PTGS2,STC1,VEGFA	519 (20)
monocrotaline		chemical toxicant		1.614	0.00165	ATP2A2,BIRC5,Ccl2,FHL1,GAP43,IL6,NCAM1,NGF,SMAD6,SPP1	405 (15)
JUND	-0.19	transcription regulator	Activated	2.261	0.00168	CCL5,COL6A1,FOSL1,HPGD,IL6,NCF2,NOX4,NTS,PLAUR,SOX4,SPP1,TIMP1,TK1,VEGFA	687 (17)
KCNE3	0.148	ion channel			0.00168	4930486L24Rik,ACPP,APOLD1,FABP5,HMGCS2,HTRA4,KCNJ2,KCNK5,NFIL3,NR4A2,OSGIN1,PER1,PTGS2,Sik1
IL5		cytokine	Activated	2.498	0.00172	ASNS,ASS1,BCL2,CD5,CD9,CDKN1A,CKAP4,CRIP1,CSF2RB,DUSP5,EGLN3,EIF4EBP1,EPOR,EPS8,FGL2,GADD45A,GADD45G,GPAM,Hbb-b2,HBEGF,HMMR,IFI30,IL13RA1,IL2RG,MKRN3,MYC,NEK2,NFIL3,PIM1,PSAT1,S100A4,S100A6,SAP30,SCRIB,Serpina3g (includes others),SLC16A3,SPN,THY1,UCHL3,UPP1	739 (19)
NRIP1	-0.765	transcription regulator		-1.677	0.00175	CCNB2,CDK1,CDKN1A,CYP4B1,FASN,IL6,PGR,PTGS2,RARB,SCD,SMAD6,THRSP,TK1	885 (24)
NCOR1	-0.069	transcription regulator		-0.555	0.00176	ACPP,CDKN1A,DBI,FASN,IGFBP3,KLK3,ME1,MME,NCOR2,NKX3-1,PDE9A,PPARG,PTGS2,RARB,SORD,THRSP,TSLP	617 (20)
SAMSN1	4.452	other	Activated	3.638	0.00176	ARID5A,BATF,Ccl7,DAB2,FGL2,HBEGF,HDC,IL6,INHBA,PLAT,PTGS2,RSAD2,SAP30,SLFN12L,TCF4,TSC22D1,USP12	407 (12)
Secretase gamma		complex		0.522	0.00181	BATF,DTX1,HEY1,HEY2,HEYL,MME,MYC,RELN,SLC16A1	531 (13)
choline		chemical - endogenous mammalian	Inhibited	-2.759	0.00181	CDKN1A,ELN,FLT1,IGF2,MBD2,OXTR,PTGS2,SLC44A1,SPP1	675 (22)
S-nitroso-N-acetylpenicillamine		chemical reagent		0.675	0.00181	ADM,BCL2,BRCA1,CDKN1A,MARCKSL1,MST1R,PTGS2,S100A10,VEGFA	665 (20)
5-N-ethylcarboxamido adenosine		chemical reagent		-0.045	0.00182	ADM,ADORA2A,Ccl2,COL1A2,CSF2RB,FZD1,GADD45A,IL6,INHBA,NFIL3,NR4A2,NRP1,PDE5A,PLK2,RGS2,SRXN1,THBS1,VCAN,VEGFA	702 (18)
Mapk		group		0.589	0.00182	ABCB1,ADA,ADAM12,BCL2,CDKN1A,COL1A1,FURIN,GJA1,HPGD,IL6,IRS1,MYC,PER1,PRKCZ,PTGS2,SNAI1,SNCG,SPP1,VEGFA	561 (19)
epinephrine		chemical - endogenous mammalian		-0.198	0.00182	ADRA2A,CCNB1,CDK1,CDKN1A,DLK1,IL33,IL6,LPL,MMP2,NPY1R,PCNA,PER1,POLA2,PTGS2,TGFA	719 (16)
ADCY		group		0	0.00184	CDKN1A,COL3A1,CYP1B1,GJA1,IL6,NR4A2,PER1	806 (25)
EBF2		transcription regulator		-0.106	0.00184	ADAMTS15,ADCY3,ARHGAP26,ENTPD2,MEOX1,SFRP4,THBS4
NFIX	-0.334	transcription regulator		-0.156	0.00184	ADAM12,CLEC3B,FABP4,NFATC4,POSTN,SERPINA3,SPARCL1
CRHR2		G-protein coupled receptor		0.57	0.00184	BCL2,Ccl2,IL6,KCNMA1,KCNMB1,SLC6A4,VEGFA	604 (22)
PTPN3	0.557	phosphatase		-0.288	0.00184	ANGPTL4,CDKN1A,COL1A1,FN1,MYC,SMAD7,TGFBI	676 (21)
LRP5	-1.553	transmembrane receptor		-0.378	0.00184	ADRB2,IGF1R,IGF2,INSR,IRS1,IRS2,TCF4	719 (24)
LILRB1		transmembrane receptor		0.378	0.00184	ADM,BCL2,FGFR3,MAF,MMP2,RECK,ST3GAL6
TLX1		transcription regulator		1.134	0.0019	CCNB1,CDC20,ERBB2,GRIN3A,KDR,NPY1R,PCNA,RAD51	409 (7)
miR-133a-3p (and other miRNAs w/seed UUGGUCC)		mature microRNA		1.167	0.0019	CXCL3,FSCN1,HCN2,IGF1R,KCNH2,KLF15,NFATC4,SLC2A4	262 (7)
FABP4	3.653	transporter		0.225	0.0019	Ccl2,CD36,FABP4,FABP5,IL6,NR1H3,PPARG,PTGS2	453 (19)
NFATC2	2.974	transcription regulator		1.954	0.00191	ACPP,BATF,Ccl2,CCL5,CCNB1,CDKN1A,CXCL3,DAB2,ENPP2,FGL2,IL6,INHBA,MAF,MYC,NOX4,PDCD1,PLAT,PLD1,PLK2,PPARG,PTGS2,PTPRS,RCAN1,RGS2,RSAD2,SLFN12L,TCF4,Tnfsf9,TRAF1,TSC22D1	667 (18)
FBXO32	-0.345	enzyme		-1.121	0.00192	CADM1,CXCL3,CXCL6,DKK2,EIF2AK3,GADD45A,HSPB7,HYOU1,IL6,LBP,MYOCD,PRKCZ,PSEN2,PTGIS,PTGS2,TFPI2	205 (7)
3,4,5,3',4'-pentachlorobiphenyl		chemical toxicant		1.142	0.00192	ACOT2,CAP2,CLDN5,COL1A1,CYCS,CYP1A1,CYP1B1,GADD45A,Gsta4,IGFBP3,ITGA7,MYH11,NQO1,PRKAR2B,SLCO2B1,TNC	618 (13)
DOCK8	-1.071	other	Activated	3.207	0.00194	ARID5A,DAB2,FGL2,HDC,IL6,INHBA,PLAT,PTGS2,RSAD2,SAP30,SLFN12L,TCF4,TSC22D1,USP12
mir-133		microRNA		1.391	0.00194	CCNB1,CDCA8,CNN1,CXCL3,FN1,FSCN1,HCN2,IGF1R,KCNH2,KLF15,PPARG,SLC2A4,TRPS1,VCAN	563 (16)
GATA3	-0.488	transcription regulator		-0.881	0.00199	ADM,ANGPTL4,BATF,BCL2,BIK,BLVRB,BOK,CCL5,CDKN1A,DTX1,EBF1,ELOVL4,ELOVL6,ETS1,FN1,FSCN1,IL6,LOX,MAF,MYC,NFIL3,NKX3-1,PCNA,PDCD1,PPARG,PTGER4,RCAN1,RET,SGPP1,SLC27A2,Sprr2a1/Sprr2a2,TEK,ZEB2	700 (21)
Tnf (family)		group	Activated	3.253	0.002	ADAMTS5,BCL2,BIRC5,Ccl2,CCL5,CXCL3,CYP1A1,ENPP2,FST,GJA1,GJA5,HSD11B1,IL33,IL6,INHBA,JAG2,KDR,LCN2,MYC,NOX4,PCNA,PTGS2,SOST,TRAF1	595 (16)
T3-TR-RXR		complex		-1.289	0.00202	CAMK4,COL6A3,FASN,ME1,PDE3B,RCAN2,SLC16A3,STRBP,THRSP,UCP2
WWTR1	0.005	transcription regulator	Inhibited	-2.538	0.00202	BMP2,COL1A1,CXCL3,FN1,GJA1,IL6,LATS2,SMAD7,SPP1,THY1	348 (12)
benzyl isothiocyanate		chemical - endogenous non-mammalian		-0.93	0.00202	BCL2,BIRC5,CCNB1,CDK1,EGFR,MMP2,MST1R,MYC,PTGS2,ZBTB4	658 (21)
EGLN1	0.12	enzyme		1.573	0.00204	ADAMTS5,ADM,ANGPT2,AURKA,Ccl2,EGLN3,EPAS1,IL6,INHBA,MYC,NGF,PTGS2,VEGFA	706 (21)
gemcitabine		chemical drug		-0.092	0.00204	BCL2,BIRC5,Ccl2,CCNB1,CDKN1A,ERBB2,FOSL1,MYC,PTGS2,RAD51,RIPK3,TGFA,VEGFA	748 (24)
PRKCE	-0.095	kinase		0.87	0.00209	ABCB1,ACTA2,ADAM12,AMIGO2,BCL2,BIRC5,CDKN1A,EGFR,IL2RG,IL6,MYC,PIM1,PTGS2,RGS2,VEGFA	640 (20)
platelet activating factor		chemical - endogenous mammalian		1.115	0.0021	ANGPT2,CDKN1A,FN1,IL6,MMP2,PLA2G7,PLAUR,PTGS2,THBS1,TIMP1,TIMP2,VEGFA	640 (20)
CD36	3.308	transmembrane receptor		1.201	0.0021	ADAMTS4,ATP2A2,COL1A1,COL4A1,FASN,IGF1R,IL6,LPL,LRP1,PPARG,SCD,SLC2A4	703 (21)
PTPN6		phosphatase		-1.206	0.0021	Ccl2,CD5,DHFR,ETS1,FN1,GP1BA,IL6,LYN,MYC,NCF2,TIMP1	682 (18)
PRKD1	-0.461	kinase	Activated	2.098	0.0021	BIRC5,Ccl2,CCL5,CD5,CXCL3,CXCL6,GATA4,IL6,LPL,MMP2,PTGS2	382 (15)
IRF4		transcription regulator		-1.695	0.0021	ADA,ALPL,Ccl2,CCNB1,CD68,CDK1,CXCL3,DBI,FAIM,FLT1,GALNT2,IL17RA,IL33,IL6,IRF5,MYC,PCNA,PLAUR,PRKCQ,RAD51,RHOB,SPP1,TK1,TRIM65,UBE2H	630 (22)
triclosan		chemical drug		0.816	0.00215	ACTA2,COL1A1,IL6,NCF2,NQO1,TIMP1	821 (17)
HSPB1	0.215	other		1	0.00215	ACTA2,Ccl2,CDKN1A,CXCL3,IL6,LPL	723 (24)
UCP2	2.578	transporter			0.00215	EPAS1,FASN,HDC,IL6,LPL,SCD	505 (19)
LATS2	-0.715	kinase		1.408	0.00215	AURKB,CCNB1,CDKN1A,LATS2,PLK1,SNAI1	657 (25)
miR-205-5p (and other miRNAs w/seed CCUUCAU)		mature microRNA	Activated	2.423	0.00215	ATP1A1,INPPL1,NCOR2,TRPS1,VEGFA,ZEB2
RGCC		other		-1.153	0.00215	ACTA2,BATF,FASN,FN1,SCD,SNAI1	276 (10)
IL11RA	-0.033	transmembrane receptor		0.896	0.00215	Ccl2,Ccl6,Ccl7,CLCA1,CXCL3,MMP2	318 (10)
rofecoxib		chemical drug		-0.488	0.00215	ANGPT2,MMP2,NGF,PTGS2,VEGFA,VEGFC	520 (17)
MAPK3	-0.267	kinase		0.919	0.00218	B4GALT1,CDKN1A,FN1,FOSL1,FURIN,HDC,IL6,MYC,PLAUR,PTGS2,RET,RGS2,SMAD3,SPP1,THBS1,TIMP1	662 (21)
azithromycin		chemical drug		-1.4	0.0022	Ccl2,CXCL3,IL6,MRC1,TSLP	533 (21)
Pdgfr		group		-1.342	0.0022	ACTA2,EREG,FN1,HBEGF,TNC	694 (25)
RGS2	1.653	other		1.342	0.0022	FABP4,HBEGF,LPL,PLAT,PPARG	537 (19)
LRAT		enzyme		-0.447	0.0022	CCNB1,CDKN1A,RARB,RBP7,TGFA	232 (11)
miR-451a (and other miRNAs w/seed AACCGUU)		mature microRNA		-0.222	0.0022	ABCB1,ADAMTS5,BCL2,MIF,MMP2
RB1CC1	-0.231	other		-1.103	0.0022	CCL5,CDKN1A,MYC,SKIL,SMAD7	646 (17)
KRIT1	-0.042	other		-0.651	0.0022	BMP2,EFNB2,KLF2,NOTCH4,THBS1
toremifene		chemical drug		-1.342	0.0022	ABCG2,DLK1,ERBB2,IGF2,KLK3	586 (7)
cytochalasin B		chemical toxicant		-1.067	0.0022	BIRC5,BMP2,CDKN1A,MCAM,MMP2	607 (21)
metoprolol		chemical drug	Inhibited	-2.236	0.0022	AQP1,GJA1,IL6,MYC,THBS4	201 (6)
trientine		chemical drug		-0.398	0.0022	COL3A1,FN1,IGFBP3,IGFBP5,SOD3	232 (7)
cucurbitacin B		chemical - endogenous non-mammalian		-0.625	0.0022	BCL2,BIRC5,CCNB1,CDKN1A,MYC	340 (11)
desmopressin		biologic drug		0.217	0.00224	ADCY3,ADM,ANK3,ATP1A1,CAPG,CARD14,F8,FLNA,KIF26A,LMNA,MME,MYH10,PALM,SLC2A4,SLC43A2,SORT1,TNS1
ETV4		transcription regulator		-0.509	0.00226	ACTA2,B4GALT1,ERBB2,FN1,HPGD,HPSE,PTGS2,SPP1,TWIST1	440 (7)
8-chloro-cAMP		chemical drug			0.00237	PRKAR2B,PTGS2,RARB
SLC39A4	0.767	transporter			0.00237	IL6,Mt1,NELL1	275 (7)
danusertib		chemical drug			0.00237	CCNB1,CDKN1A,GADD45A	476 (6)
CHFR	0.017	enzyme			0.00237	AURKA,KIF22,PLK1	441 (7)
ARTN		growth factor			0.00237	ALDH1A1,BCL2,TWIST1	298 (9)
G0S2	-1.342	other			0.00237	CDCA7,MYC,SLC19A1
FBLN2	-0.885	other			0.00237	FBLN1,MMP2,VEGFA
PGRMC1	0.196	transmembrane receptor			0.00237	EGFR,LCN2,PGR	338 (7)
Bc1		translation regulator			0.00237	ACTA2,CNN1,SMAD3	271 (7)
parbendazole		chemical reagent			0.00237	ALPL,BMP2,SPP1	238 (7)
LRRC8C	-0.419	ion channel			0.00237	FABP4,LPL,PPARG
GR-MD-02		chemical drug			0.00237	ACTA2,CD36,LGALS3
salicylamide		chemical drug			0.00237	ABCG2,CYP1A1,CYP1B1	606 (11)
microcystin-LR		chemical toxicant			0.00237	IL6,MMP2,MYC	653 (23)
colcemid		chemical - endogenous non-mammalian			0.00237	CCNB1,CYP1A1,NQO1
SOX3		transcription regulator		0.775	0.00238	AXIN1,BMPR1A,DSP,DUSP5,EFEMP1,FRZB,INHBA,IRS1,NRP1,PDGFRA,PEG3,RET,SMAD1,USP18,VEGFA
rottlerin		chemical toxicant		-1.296	0.00238	AQP1,BIRC5,Ccl2,CDK1,CDKN1A,COL1A1,COL3A1,CXCL3,ECE1,LPL,MMP2,PCNA,PLD1,PTGS2,RGS2	659 (23)
geldanamycin		chemical - endogenous non-mammalian		0.981	0.0024	BCL2,BGN,BIRC5,CDH5,COL6A2,CYP1A1,DBNDD2,EGFR,ERBB2,FBLN2,FGFR1,GJA1,HDAC11,IRF5,IRS1,IRS2,LCK,LGR6,MYC,OPTC,PCDH1,PTGS2,RIPK3,RPS6KA2	783 (20)
GRP		growth factor		0.487	0.00243	IL33,KLK3,MYC,PTGS2,RRM2,TSLP,TWIST1,VEGFA	607 (17)
LTB4R		G-protein coupled receptor		0.647	0.00243	Ccl2,CXCL3,FLT1,MMP2,MRC1,NR1H3,PTGS2,VEGFA	774 (20)
ARID1A	-0.073	transcription regulator		1.359	0.00243	ALPL,CCNB2,CDKN1A,FZD1,FZD2,FZD4,LRP5,TCF4
Fibrin		complex			0.00244	ACTA2,CDH5,CNN1,FN1,IL6,KDR,KRT18	493 (12)
PDGF-DD		complex		1.134	0.00244	BIK,Ccl2,Ccl7,KDR,PDGFRA,PGF,TUBB6	212 (7)
FAM3B		cytokine			0.00244	CDKN1A,DAPK2,FN1,GJA1,IGFBP3,LCN2,PTN	257 (7)
SEMA7A	-0.068	transmembrane receptor		-1.89	0.00244	COL1A1,COL1A2,COL3A1,ELN,FN1,SMAD6,TIMP1	292 (7)
HTATIP2	0.371	transcription regulator		-0.159	0.00244	ANGPT2,EGFR,MMP2,MYC,SNAI1,SPP1,VEGFA	645 (21)
evodiamine		chemical - endogenous non-mammalian		-1.633	0.00244	ABCB1,BCL2,BIRC5,CYP1A1,EIF2AK3,MYC,PTGS2	673 (19)
EP400	0.003	other		1.593	0.00245	CDC20,CDCA3,CDKN1A,CENPF,FABP4,FBXO5,NEK2,PCNA,PLK1,PPARG	151 (7)
S100A4	1.447	other		0.647	0.00245	CCL5,CDKN1A,CXCL3,EFNA1,FN1,MMP2,SNAI1,THBS1,TIMP1,TIMP2	572 (22)
HOXC6		transcription regulator		-1.558	0.00245	ABCB1,BCL2,COL23A1,FGFR2,IGFBP3,MME,PDGFRA,PLXDC1,SLC44A1,ZBTB7C
telmisartan		chemical drug		0.402	0.00247	BCL2,IL6,LPL,MRC1,NR4A2,PLA2G5,PPARG,PTGS2,PTH1R,SLC2A4,TRPC1,TRPC3	647 (24)
vitamin D		chemical drug		-0.923	0.00247	BCL2,BIRC5,CDK1,CDKN1A,CYP1A1,IL6,INSR,PCNA,RARB,S1PR2,SPP1,TYMS	766 (26)
cholecalciferol		chemical - endogenous mammalian		-1.058	0.00248	BCL2,BIRC5,BRAP,CCL5,CDA,COL1A1,DKK2,EGFR,GAS7,IGFBP3,LY75,ME1,PDGFRA,PDGFRB,PPARG,PTH1R,PTHLH,PTPRB,SPP1,SULF2	723 (25)
RAC1	-0.523	enzyme		-0.489	0.00252	ABCB1,ACTA2,BID,Ccl2,COL1A2,DPYSL2,DYRK1B,FN1,FOSL1,IL33,IL6,ITGA6,MMP2,MYC,PLAUR,PTGS2,RAC3,SOX5,VEGFA	633 (18)
okadaic acid		chemical toxicant	Activated	2.131	0.00252	ACE,ALDH3A1,ANXA1,CDK1,CYP1B1,ELN,IL6,IRS1,MAP3K8,MYC,NR2F2,PIM1,PTGS2,RARB,SPP1,THRSP,TK1	732 (24)
GLI3	-0.537	transcription regulator		-0.619	0.00257	BCL2,DUSP2,DUSP5,EBF1,FOXC2,HMGB2,JAG2,KLF2,MAPKAPK2,PAX9,PTCH1,PTHLH,SFRP1,STMN1
SASH1	0.37	other	Activated	2.673	0.00257	ACPP,ARID5A,FGL2,HDC,IL6,INHBA,PLAT,PTGS2,RSAD2,SAP30,SLFN12L,TCF4,TSC22D1,USP12	274 (7)
sulindac sulfide		chemical drug	Activated	2.113	0.00257	CDKN1A,CYP1A1,CYP1B1,DYNLL1,GADD45A,GADD45G,INSIG1,NQO1,PGR,PRSS23,PTGS2,RANBP1,STC1,STC2	604 (16)
JAK2	-0.512	kinase	Activated	2.433	0.00268	ACE,ACTN1,Ccl2,CCL5,CD36,CDC42BPB,CDKN1A,ENPP2,EPOR,GCNT2,Ifitm1,IGF1R,IL6,LCN2,LYN,MYC,POP4,PTGS2,RIPPLY3,SEMA6B,THBS1	706 (22)
napabucasin		chemical drug		0.262	0.00275	ALCAM,ALDH1A1,AXL,BIRC5,DACH1,DDR1,ERBB2,FGFR2,ITGA2,ITGA6,MYC,PLAUR,SMO
Sn50 peptide		chemical toxicant		-1.179	0.00275	BCL2,BIRC5,Ccl2,GJA1,IL6,KCNC4,MIF,MMP2,MYC,PPARG,PTGS2,SNAI1,STC1	720 (20)
asoprisnil		chemical drug		1	0.00279	APOD,BCL2,EGFR,G0S2,IGF1R,PCNA,PGR,RARRES1,XDH
CRNDE		other		-1.723	0.00279	CDKN1A,DUSP5,DUSP8,EGFR,FGFR3,MAP3K8,PDGFRB,PGF,VEGFA	250 (7)
semaxinib		chemical drug		-1.912	0.00279	FHL1,IL6,KDR,LCN2,NR4A2,PCNA,PTGIS,PTGS2,THBS1	642 (19)
KMT2A		transcription regulator		-1.596	0.00279	ABTB2,BCL2,CDKN1A,EPHB3,ETS1,EYA1,FOXC1,FOXC2,HOXA10,HOXB6,Meis1,MYC,PGR,RGS4,SMAD1,TRIB1	691 (20)
nocodazole		chemical reagent		0.452	0.00279	AURKA,CCNB1,CDK1,CDKN1A,CDKN3,CSK,FLNA,GSK3A,LATS2,MAP3K8,NEK2,PIM1,PLK1,PRKCZ,PTGS2,SCD	720 (22)
ciprofloxacin		chemical drug		0.943	0.0028	ACTN1,CD68,CPD,CSF2RB,EMILIN2,IGF1R,ITGA9,LGMN,MAN2B2,MMP2,NRCAM,NRP1,RPL12,SGIP1,SLC2A6,SPP1,TMPO,TTYH3,UBTD1
12(S)-hydroxyeicosatetraenoic acid		chemical - endogenous non-mammalian		-0.205	0.00287	FN1,IL6,PPARG,PTGS2	455 (17)
rhodamine 6G		chemical toxicant		-1	0.00287	BCL2,CCNB2,PCNA,PRC1
MEDAG		other		1	0.00287	CD36,FASN,LPL,PPARG
cyanidin 3-O-glucoside		chemical - endogenous non-mammalian		-1.154	0.00287	CCL5,IL6,NR1H3,PTGS2	613 (20)
miR-140-5p (and other miRNAs w/seed AGUGGUU)		mature microRNA		0.218	0.00287	ADAMTS5,IGFBP5,SMAD3,VEGFA
GSC		transcription regulator		-1.964	0.00287	CLCA2,FOXC2,TWIST1,ZEB2	407 (7)
DES	-1.309	other			0.00287	ACE,HOXA10,KRT18,SPP1
HEYL	-1.416	transcription regulator		1	0.00287	GATA4,KLK3,MMP2,MYH11
FBLN5	-0.719	other		-0.686	0.00287	CEP55,MMP2,SERPINA1,TWIST1	291 (7)
PDZK1	-0.565	transporter		0	0.00287	AQP1,RAPSN,SLC26A6,SLC7A2
DIABLO	0.112	other		-1.974	0.00287	BIRC5,CDKN1A,MKI67,PDCD1	273 (7)
proteasome inhibitor		chemical drug		1.067	0.00287	AQP1,MYC,NTRK2,PPARG	409 (11)
NCOR2	-0.906	transcription regulator	Inhibited	-2.196	0.00289	BCL2,CDKN1A,HBEGF,IL6,KLF2,LPL,MMP2,MYC,PGR,PTGS2,RARB,TSLP	747 (25)
SERPINF1	-0.389	other		-1.69	0.00289	ACTA2,BCL2,BID,CDH5,CSPG4,G0S2,LOXL1,MYC,NGF,PDGFRA,PPARG,THBS1	620 (18)
cadmium chloride		chemical toxicant		-0.056	0.00289	CCL5,GADD45A,Gsta4,IGFBP6,KLK3,LPAR1,Mt1,Mt2,MYC,NKX3-1,PCNA,SNAI1	833 (23)
nicotine		chemical drug		-0.98	0.00294	ATP6V0D2,BCL2,BIRC5,BMP2,CACNA2D1,Ccl2,CDKN1A,CHRM3,CXCL3,DBI,DHFR,FN1,GJA1,IL6,KCNB1,KDR,LGALS3,MMP2,PCNA,PLAT,PLAUR,POSTN,PTGS2,PTH1R,PTHLH,SPP1,TFPI2,TRPC1	520 (20)
SRSF2	-0.144	transcription regulator		-1.067	0.00295	ABCC9,AURKA,AURKB,COL1A1,HSD3B7,MST1R,PLK1,PYGM,RRM2,Tmsb4x (includes others)	527 (12)
retinoid		chemical drug		1.4	0.00295	CDKN1A,GJA1,HBEGF,IGFBP3,ITGA6,MYC,PTGS2,RARB,TGFBI,VEGFA	657 (25)
beta-carotene		chemical - endogenous mammalian		-1.943	0.00295	DBI,ELOVL6,FABP4,IL6,LPL,ME1,PPARG,PTGS2,SLC16A12,SLC2A4	698 (17)
baicalein		chemical drug		-0.751	0.00295	ABCB1,BCL2,BIRC5,CCNB1,CYP1A1,IGF1R,IL6,KDR,MMP2,PTGS2	630 (19)
FGF7		growth factor		0.06	0.00295	APRT,CDKN1A,EGFR,FABP5,FASN,FGFR1,FGFR2,HAS3,IL7,LPCAT1,MMP2,S100A10,SCD,VEGFA	667 (24)
GnRH-A		chemical reagent		1.183	0.00295	ACE,CD68,CDKN1A,FOSL1,FST,FXYD5,GCNT2,PER1,PRSS23,RASD1,RGS2,SKIL,SLC6A4,UHMK1	426 (12)
nitroprusside		chemical drug		-0.196	0.00296	ACTN1,ADM,BCL2,BIRC5,CXCL3,FLT1,LAMB1,MYC,PTGS2,SLC1A4,VEGFA	604 (21)
Ctbp		group		0.13	0.003	ADRB2,GADD45A,HEY1,PERP,PLAUR,STAP2
Pdgf Ab		complex		0.842	0.003	BIRC5,EREG,HBEGF,IL6,SCD,VEGFC	621 (18)
HCAR2		G-protein coupled receptor		-0.816	0.003	AVEN,IL6,IQGAP3,PLK1,PTGS2,SLC37A2	755 (20)
AGPAT2	0.261	enzyme		0.896	0.003	ELOVL6,FABP4,FASN,PPARG,SCD,SLC2A4
PLA2G4A	0.393	enzyme		0.688	0.003	Ccl2,IL6,KRT18,MYC,PLA2G5,PTGS2	550 (18)
ITGB4	-0.533	transmembrane receptor		-0.117	0.003	BIRC5,CCL5,ENPP2,EREG,IL6,VEGFA	651 (19)
ITGA6	2.39	transmembrane receptor		0.869	0.003	BCL2,BIRC5,ENPP2,ITGA2,ITGA7,VEGFA	743 (23)
BARX2		transcription regulator		-1.4	0.003	ACTA2,DYNLL1,FLNA,NCAM1,SOX5,TIMP1
CXCL3	1.109	cytokine		1.766	0.003	Ccl2,CCL5,CXCL3,IL6,ITGA6,POSTN	652 (22)
thiazolidinedione		chemical drug		-0.447	0.003	IRS1,IRS2,NR4A2,SOST,SPHK1,UCP2	778 (21)
magnolol		chemical - endogenous non-mammalian		-0.152	0.003	BCL2,CDKN1A,CLEC11A,IL6,MMP2,PTGS2	696 (25)
LPIN1	-0.314	phosphatase		-1.381	0.00307	CDKN1A,DLK1,FABP4,FASN,IL6,PPARG,PTGS2,SCD	591 (22)
indican		chemical - endogenous mammalian		-1.294	0.00307	ANGPT2,CA9,CDKN1A,EGLN3,NOX4,PTGS2,SMAD3,THBS1	636 (20)
tosedostat		chemical drug		0.788	0.00307	ASNS,ASS1,CBS/CBSL,CDKN1A,GADD45A,PSAT1,STC2,VEGFA
Focal adhesion kinase		group		-0.992	0.00307	BCL2,DSP,EFNB2,FZD4,IL6,KLK3,KRT18,MMP2	719 (21)
TAB1	-0.131	enzyme	Inhibited	-2.157	0.00307	CCL5,CDKN1A,CFB,CH25H,IL6,PTGS2,RGS2,XAF1	681 (19)
NCOA4	-0.474	transcription regulator		0	0.00307	FABP5,FGFR2,FGFR3,GATA4,KLK3,MME,NKX3-1,ST3GAL6	735 (11)
bardoxolone methyl		chemical drug		-1.977	0.00307	BCL2,BIRC5,Ccl2,IL6,MYC,PTGS2,THRSP,TRAF1	654 (19)
NFATC1	0.328	transcription regulator		1.232	0.00316	BCL2,COL1A1,CYP1A1,CYP1B1,GPC6,IL33,IL6,ITGB3,MYC,MYH11,NKX2-3,NOX4,NQO1,PDCD1,PPARG,PTGS2,RCAN1,SPP1	672 (22)
caffeic acid phenethyl ester		chemical drug		-1.31	0.00316	ABCB1,ABL1,BCL2,BIRC5,CDKN1A,EGFR,IGFBP6,IL6,MKI67,MMP2,NQO1,OLR1,PCNA,PLD1,PTGS2,RARB,RHOB,S100A6	624 (15)
vitamin E		chemical drug	Inhibited	-2.059	0.00317	ACTA2,ALOX12,BCL2,CD36,CDKN1A,LPL,MMP2,NFIL3,PCNA,PLAT,SPP1,UCP2,VEGFA	558 (25)
BCL2L1	0.09	other		-0.927	0.00317	ATP8A2,BCL2,Ccl2,COL6A2,CXCL3,CYCS,DHFR,FN1,Ly6a (includes others),NQO1,SPN,THBS1,TIMP1	724 (24)
ETV1	-1.463	transcription regulator		-0.478	0.0032	ADRB2,BRCA1,ERBB2,HPSE,ITGB3,PLAUR,TWIST1
NTRK1		kinase		1.091	0.0032	BCL2,CDKN1A,GADD45A,IGF2,RET,SCRIB,TSC22D1	793 (25)
TRPV4	-0.423	ion channel		1.937	0.0032	Ccl2,CCL5,Ccl7,CXCL6,IL6,THBS1,TIMP1	602 (14)
trypsin		group		0.555	0.00333	CDKN1A,ELN,MIF,PCNA,PTGS2	656 (22)
FH	0.045	enzyme			0.00333	APOD,BLVRB,CDKN1A,LTBP2,NQO1
XRCC5	-0.329	enzyme			0.00333	FASN,KLK3,Mt1,SEMA3A,XDH
VEGFD		growth factor		-0.152	0.00333	ADAM33,BCL2,IL6,PTGS2,VEGFC	557 (17)
PTGER1	-0.786	G-protein coupled receptor		0.317	0.00333	ANGPTL4,FN1,IL6,PTGS2,VEGFC	789 (22)
vatalanib		chemical drug		1.253	0.00333	ACTA2,BCL2,CDKN1A,COL1A1,TIMP1	655 (22)
gamma-linolenic acid		chemical - endogenous mammalian		-0.447	0.00333	FASN,PCNA,PLIN4,PTGS2,THRSP	379 (11)
gambogic acid		chemical - endogenous non-mammalian		-1.342	0.00333	BCL2,MYC,PTGS2,TRAF1,TYMS	631 (18)
PRKCA	0.424	kinase		0.344	0.00335	CDKN1A,COL1A1,CXCL3,CYCS,DTX1,ERBB2,ETS1,FN1,HEY1,IGFBP3,INSIG1,LPL,MYC,NOTCH4,NQO1,PLD1,PTGS2,RSAD2,TRPC1,VEGFA	742 (22)
trichloroethylene		chemical toxicant		1.155	0.00336	ARHGAP18,COL1A1,COL3A1,ECE1,GSTO1,IGFBP3,IL13RA1,MAPKAPK2,PLD1,PTH1R,RHOB,SLC16A1
SCD	-0.852	enzyme		-1.869	0.00336	ANGPTL4,BCL2,Ccl2,CD36,CXCL3,DIO2,FASN,GADD45A,GPAM,IL6,LPL,UCP2	695 (22)
benzene		chemical toxicant		1.249	0.00336	ARHGAP18,CDKN1A,COL1A1,COL3A1,ECE1,IGFBP3,IL13RA1,MAPKAPK2,PLD1,PTH1R,RHOB,SLC16A1
SOX1		transcription regulator		1.069	0.00336	AXIN1,BMPR1A,DSP,DUSP5,EFEMP1,FRZB,INHBA,IRS1,NRP1,PDGFRA,PEG3,SMAD1,USP18,VEGFA
PAX7		transcription regulator		0.277	0.00336	ASS1,ATP11A,FAM107B,IL13RA1,Marcks,MEST,MYO1D,NPNT,NQO1,PDLIM4,PEG3,PPARG,PRSS23,SLC44A1
POR	-0.6	enzyme		-0.115	0.00338	ALDH1A1,ASNS,CD36,CD74,Ces2c,CYP1A1,CYP7B1,ELOVL6,ENTPD5,EREG,FADS2,FOXC1,Ifitm1,INSIG1,JDP2,KDR,LPL,Mt1,PFKFB3,PLA2G7,POR,PPARG,RPS6KA2,SCD,SERPINA3,SQLE,VEGFA	617 (16)
XDH	1.422	enzyme		-0.978	0.00341	ACTA2,Ccl2,CXCL3,INSR,MMP2,PLAUR,PPARG,SPP1,TIMP2	448 (16)
PGF	1.592	growth factor		0.2	0.00341	ANGPTL4,BCL2,BIRC5,CDK1,EREG,FLT1,FST,IL6,NRP2	679 (21)
CTF1	-0.289	cytokine		0.391	0.00341	ENPP2,FASN,GATA4,IRS1,LBP,MYH11,PPARG,SERPINA3,TIMP1	755 (24)
PRKCD	0.028	kinase		0.462	0.00343	BCL2,BIRC5,Ccl2,CCL5,CD68,CDKN1A,COL1A1,COL1A2,EPOR,FOSL1,FZD1,IL2RG,IL6,KIF2C,MMP2,MYC,NAV2,PPP1R3D,PTCH1,PTGS2,RCAN1,SMAD6,SPHK1,SPRY1,TRAF1,TRPC1,TTC9,VEGFA	508 (21)
AICAR		chemical - endogenous mammalian		1.349	0.00348	ACTA2,BCL2,CCNB1,CDKN1A,CYCS,EGFR,FASN,FN1,HSD11B1,HYOU1,IGF1R,IL6,MKI67,PPARG,SCD	526 (20)
DGCR8	-0.241	enzyme		0.135	0.00349	ACTA2,CNN1,ERBB2,GJA1,MYC,NCAM1,NRCAM,SMO,SMOC1,TCF7L2,TNC	421 (7)
AURK		group		-1.554	0.00349	AEN,ANK1,CDKN1A,CMBL,CYFIP2,CYP26B1,EDA2R,HSPA4L,PDE2A,SCRIB,SULF2
EPHB4	0.26	kinase		-0.061	0.00349	BMP2,FGFR2,Hbb-b1,IGF2,KDR,MYC,NCAM1,NCAM2,PAX9,SMAD6,TEK
H2AFB3 (includes others)		other		0.905	0.00349	BIK,CDKN1A,DCLK1,EFNA1,GAS1,GMFG,HIP1R,LMO1,LYPD1,NKX3-1,PCDH9
ANLN	0.195	other		-1.508	0.00349	AEN,ANK1,CDKN1A,CMBL,CYFIP2,CYP26B1,EDA2R,HSPA4L,PDE2A,SCRIB,SULF2
UCP1		transporter	Activated	2.055	0.00351	ACOT2,ASB2,ASNS,CCDC136,CD68,DKK3,EIF4EBP1,FASN,GADD45A,GREM2,GSTO1,IL6,KCNAB1,MYC,NT5C,PHYHD1,PSAT1,SHMT1,SLC6A9,SMOX,Snhg12,STAP2,STBD1,SYNM,UCP2	548 (12)
MAX	-0.376	transcription regulator			0.00354	ACTC1,BCR,Ccl6,CCNB1,CDKN1A,CYCS,DHFR,DUSP2,EBF1,FADS2,GADD45A,HMGA1,MYC,PDGFRB,RARB,UBE2C	375 (5)
mir-8		microRNA		-1.052	0.00357	ADAM12,BMP2,BST1,CDKN1A,DUSP26,ETS1,FOXF2,GRB7,IL6,KDR,LEPR,MYH10,PERP,PGR,PKD1,PTHLH,RHPN2,SNAI1,SULF2,TIMP2,ZEB2	579 (19)
alitretinoin		chemical drug		-0.546	0.0037	ADAMTS4,APOD,BCL2,Ccl6,CD36,CDKN1A,CYCS,FABP4,FASN,FN1,IL6,MKI67,PELP1,PGLYRP1,PPARG,PTGIS,RARB,RARG,SCD,SMAD3,SNAI1,SPP1,TK1,WNT5B	730 (22)
Rb		group		-1.608	0.00383	AURKB,BIRC5,CDK1,CDKN1A,CYP1A1,DHFR,ECT2,FGFR2,MYC,NEO1,PCNA,PLK1,TOP2A,TYMS	547 (16)
HISTONE		group			0.00383	ABL1,BCL2,DKK3,HPGD,IL6,NFATC2,NOD2,PTGIS	534 (18)
PTH1R	1.167	G-protein coupled receptor		0.209	0.00383	CDK1,COL1A1,NR4A2,PTHLH,SOST,SPP1,TNFRSF11A,ZNF521	374 (12)
DIO3		enzyme		0.788	0.00383	ALDH1A1,COL6A1,FXYD6,HR,ITGA7,ITIH3,Nrgn,SYCE2	223 (7)
everolimus		chemical drug		-0.906	0.00383	CCNB2,CDK1,CDKN1A,EGFR,FSCN1,KDR,MMP2,MYC	708 (23)
betulinic acid		chemical drug		-0.475	0.00383	BCL2,BIRC5,IL6,MMP2,NOX4,PTGS2,TIMP1,TIMP2	635 (21)
KLF5		transcription regulator		-0.34	0.00389	ACTA2,BIRC5,CCNB1,CCNB2,CDK1,CDKN1A,EPAS1,MYC,PCNA,PPARG,SORCS2,UCP2	739 (24)
TRAF2	0.13	enzyme		0.947	0.00393	ADM,AURKA,AURKB,CCL5,CCNB1,CDK1,CXCL3,EFNA1,EGFR,IL6,KLF2,PLK1,Serpina3g (includes others),ST8SIA6,TK1	670 (18)
cobalt chloride		chemical reagent		0.381	0.00393	ACTA2,ADM,BCL2,CA9,CDKN1A,CYP1A1,CYP1B1,EPAS1,FLT1,PLAUR,PTGS2,RGS5,SORL1,SPHK1,VEGFA	739 (22)
STAT5a/b		group		1.991	0.00395	BCL2,BMP6,CD36,CDKN1A,DUSP2,EBF1,LEPR,LRMP,MAF,MYC,PIM1,PROX1,PTGS2,RAD51,RARB,RFTN1,TSLP	626 (21)
CEBPD	0.43	transcription regulator		0.838	0.00395	ASNS,BIRC5,BRCA1,Ccl2,CCNB1,CCNB2,CXCL3,CYP1A1,FABP4,IGFBP5,IL6,MYC,NGF,PDGFRA,PPARG,PTGS2,VEGFC	673 (20)
ADAM10	-0.23	peptidase			0.00397	ABAT,ATP2A2,BID,CACNA2D1,CD74,CDH5,DCLK1,DLGAP1,DTNA,EGFR,GADD45G,GNAQ,HIP1,INHBA,LCK,RGS4
lenalidomide		chemical drug		-0.394	0.00398	BID,CEP72,DTNA,EPOR,FLNA,FZD2,FZD4,FZD7,GPR68,HIST1H2BG,HS3ST3B1,KCNMA1,LPL,LRP1,LRP5,PGM2,PLOD2,RAD18,RASGRP3,RGS16,ROR1,RTP4,SLC7A2,SNHG3,SUMF1,TCF4,TCF7L2,WDR72
HOXA13		transcription regulator			0.00406	ALDH1A1,BMP2,EMP2,HOXB6,NOG,SHROOM3
ATXN1	0.043	transcription regulator		1.387	0.00406	ATP2A2,HMGB2,ICMT,INPP5A,TRPC3,VEGFA
WWOX	0.755	enzyme		1.633	0.00406	BCL2,COL1A1,IL6,TIMP2,TK1,VEGFA	666 (19)
TBXT		transcription regulator		-1.342	0.00406	ALCAM,COL1A1,FMOD,HAPLN1,KDR,SOX5
ACTB	-0.093	other	Activated	2.449	0.00406	AURKA,AURKB,CCNB2,CIT,RACGAP1,STMN1
RARRES2	-0.428	transmembrane receptor		-1.109	0.00406	Ccl2,CCL5,CCNB2,FASN,IL6,SLC2A4	870 (19)
MUC4		other		-0.928	0.00406	CDKN1A,EGFR,ERBB2,KRT18,SNAI1,TWIST1	724 (20)
CLDN7	-0.324	other		1.867	0.00407	ABLIM1,ALDH3A1,CD68,CKAP4,CLIP4,DENND5A,FOSL1,FOXQ1,FZD2,GRINA,IGFBP7,LGALS3,MMP2,MRPL40,NNMT,PRKCZ,PRSS23,SERPINB1,TIMP2,TSPAN12
inosine		chemical - endogenous mammalian	Activated	2.724	0.00409	ALCAM,ANXA1,CD68,CFB,EIF4EBP1,GAP43,IFITM3,LCP1,Mt1,SERPINB1,TIMP1
GPER1		G-protein coupled receptor		0.613	0.00409	CDKN1A,DUSP5,FASN,ITPRIP,MYC,NR4A2,PTGER4,RASD1,RGS16,SFRP2,TUFT1	866 (26)
2,3,4,7,8-pentachlorodibenzofuran		chemical toxicant		1.211	0.00409	ACOT2,CAP2,COL1A1,CYCS,CYP1A1,CYP1B1,GADD45A,ITGA7,MYH11,NQO1,PRKAR2B	105 (3)
E2F5	0.283	transcription regulator			0.00412	AURKB,CDK1,CDKN1A,DHFR,MYC,PCNA,RANBP1
BCL2L11	-0.197	other		-0.713	0.00412	ADRB2,BCL2,Ccl2,CCL5,CD36,HDAC9,IL6	694 (14)
PCYT1A	-0.353	enzyme		0.478	0.00412	AXL,Ccl2,FGFR1,FST,MAPKAPK2,SCD,STX3	450 (13)
tosylphenylalanyl chloromethyl ketone		chemical - protease inhibitor		-0.6	0.00412	BCL2,EPHX2,IL6,MMP2,MYC,PTGS2,SMAD7	590 (18)
LRP6	-0.555	transmembrane receptor		-0.728	0.00413	ACTA2,CD68,IL6,KRT18,LEPR,MMP2,MYC,PNPLA3,TTYH1	742 (24)
SPRY2	-0.681	other		0.056	0.00413	CDKN1A,EGFR,EPAS1,ETS1,ETV1,FGFR3,MEST,PCNA,PFKFB3	709 (24)
NR2F2	3.183	ligand-dependent nuclear receptor		0.647	0.00413	EFNB2,GATA6,KDR,LPL,NR2F2,NRP1,PROX1,RARB,VEGFA	440 (13)
mevalonic acid		chemical - endogenous mammalian		0.299	0.00413	FASN,GNAI1,KLF2,LPL,MYOCD,PLAT,PTGS2,SMAD3,VEGFA	743 (25)
levothyroxine		chemical - endogenous mammalian		0.582	0.00417	ABCB1,ATP2A2,CAMK4,CDKN1A,DIO2,IGFBP3,IGFBP6,ITGB3,Nrgn,PCSK6,SEMA3C,SFRP2,THRA	694 (21)
NOS3	-0.575	enzyme		-0.8	0.00419	BMP2,Ccl2,CXCL3,IL6,MMP2,NPR1,PDE5A,PTGS2,SNAI1,SOD3	614 (23)
HR	-1.888	transcription regulator		-1	0.00419	ANO1,BOC,COL6A1,DOK2,FGF13,GJA1,KLK3,NACC2,PREX2,PVT1
SNCA		enzyme		1.503	0.00428	ALDH1A1,BAIAP2,BRCA1,Ccl2,CD68,CD74,CDH6,CTHRC1,DLK1,EGFR,EPS8,FAM107A,FGF13,IL13RA1,IL6,MAPK8IP1,NCF2,NECAB1,NPTX1,NPTXR,NR4A2,Nrgn,PDE2A,PDZRN3,PLAC8,PLXNC1,RET,RSAD2,SERPINB1,SLC18A2,TMEM117,WIPF3	681 (19)
FOSL1	0.938	transcription regulator		-0.274	0.00434	ADM,AXL,Ccl2,Ccl6,Ccl7,CXCL6,ELN,FOSL1,HPGD,IL6,MMP2,NTS,PLAUR,SNAI1	565 (19)
cadmium		chemical toxicant		1.24	0.00434	ATP1A1,BID,CDKN1A,CYP1A1,CYP26B1,GNS,LGALS3,LOX,Mt1,Mt2,MYC,PGR,PTGS2,TIMP1	852 (23)
GMNN	0.496	transcription regulator		1.069	0.00443	AXIN1,BMPR1A,CDKN1A,DSP,DUSP5,EFEMP1,FRZB,INHBA,IRS1,NRP1,PDGFRA,PEG3,SMAD1,USP18,VEGFA	468 (7)
metformin		chemical drug		-0.654	0.00446	ABCB1,ACTA2,BCL2,BMP2,CDKN1A,EGFR,EIF2AK3,ERBB2,FASN,FN1,GRB14,HBA1/HBA2,IGF1R,IL6,INSIG1,INSR,IRS1,ITGA6,MYC,PGR,PTGS2,SLC2A4,SLIT2,SORT1,UCP2	744 (23)
E2f		group	Activated	2.452	0.00447	BRCA1,CCNB1,CDK1,DBF4,DHFR,DUOX2,EPAS1,EXOSC8,GINS2,ITGA6,MYC,NUSAP1,PCNA,POLA2,RAD51,RRM2,TPX2,TTK,TYMS,UBE2C	586 (17)
thyroid hormone		chemical - endogenous mammalian		0.1	0.00458	ACE,AK4,ATP2A2,CAMK4,CDKN1A,Cyb5r3,DAG1,DBI,DIO2,FASN,HR,IGFBP3,LPL,ME1,MYC,NTRK2,PER1,PLA2G5,RELN,S100A10,SEMA5B,SEMA6B,SLC6A4,THRB,THRSP,Tmsb4x (includes others),UCP2	465 (20)
PARP1	-0.229	enzyme		1.936	0.00463	BCL2,Ccl2,CCL5,CDKN1A,CXCL3,DNAAF4,ECE1,ERBB2,FASN,IL6,KLK3,MYC,PFDN1,PTGS2,RAPGEF4,SNAI1,TGFA,TIMP2,VEGFC	486 (18)
RARB	0.7	ligand-dependent nuclear receptor		1.181	0.00469	CDH5,CDKN1A,CYP26B1,EGFR,ETS1,GADD45A,GAP43,GATA4,HOXA10,IGFBP3,IGFBP6,IL6,KLK3,Meis1,PTGS2,RARB,RET,SPP1,USP18,VEGFA,VEGFC	808 (24)
PRKG1	0.067	kinase		1.709	0.00473	ACTA2,BCL2,CDKN1A,COL1A1,COL3A1,FN1,PPARG,THBS1	612 (22)
GJA1	1.165	transporter		0.18	0.00473	BMP2,CDKN1A,FGFR3,GJA1,GJC2,SPP1,THBS1,VEGFA	631 (20)
PRKCZ	0.816	kinase		-1.035	0.00473	BCL2,CD1D,COL1A2,ETS1,MMP2,MYC,PSAT1,VEGFA	514 (18)
NRXN1		transporter			0.00473	COL4A6,FBLN5,FLRT2,ITGA7,MMRN1,PCDH19,THBS1,TNC
hymecromone		chemical drug		0	0.00473	ACTA2,ADAMTS4,BCL2,EGFR,ERBB2,HAS3,HMMR,MMP2	590 (15)
vitamin A		chemical - endogenous mammalian		0.353	0.00473	AQP1,BMP2,CDKN1A,CYP1A1,CYP26B1,GPRC5B,RARB,RARG	275 (9)
parthenolide		chemical drug		-0.861	0.00473	ADAMTS5,BCL2,Ccl2,CCL5,CLDN5,IL6,LTC4S,PTGS2	645 (19)
Bay 11-7082		chemical - kinase inhibitor	Inhibited	-2.366	0.00476	ADORA2A,BMP2,Ccl2,CCL5,CXCL3,FLT1,GJA1,IL6,MMP2,PIM1,PTGS2,S100A4,SAMSN1	496 (21)
PTPN1	0.315	phosphatase		-0.475	0.00477	ARID5A,Ccl7,CXCL3,DUSP2,FASN,INSR,IRS1,IRS2,NOX4,PGR,SMAD7	730 (23)
carboplatin		chemical drug		1.897	0.00477	ABCB1,ASNS,FXYD5,LAMC2,LCN2,LGALS3,MRC1,MYC,SPP1,TIMP1,UPP1	506 (13)
glucosamine		chemical - endogenous mammalian		-1.278	0.00477	ASS1,ATP2A2,BCL2,CXCL3,FASN,IGF1R,IL6,INSR,LEPR,PTGS2,TGFA	698 (23)
8,9-epoxyeicosatrienoic acid		chemical - endogenous mammalian		0.152	0.00481	EGFR,FABP4,NME1,PLAT	542 (13)
1L-6-hydroxymethyl-chiro-inositol 2-(R)-2-O-methyl-3-O-octadecylcarbonate		chemical - kinase inhibitor		-0.152	0.00481	IL6,MMP2,PPARG,PTGS2	713 (22)
nilotinib		chemical drug		0.908	0.00481	COL1A1,COL1A2,FN1,MYC	677 (23)
Mir218		microRNA		1.004	0.00481	DKK2,SFRP2,SOST,SPP1
4-nonylphenol		chemical toxicant			0.00481	FABP4,LPL,MYC,SKIL	489 (15)
TET3	-0.424	enzyme		-1	0.00481	EPAS1,POR,SLC12A5,SLC43A2
AFF4	-0.248	transcription regulator			0.00481	ANKRD37,MYC,STC2,Tmsb4x (includes others)
salmonella typhimurium lipopolysaccharide		chemical - endogenous non-mammalian	Activated	2	0.00481	Ccl2,CCL5,IL6,PTGS2
MKX		transcription regulator			0.00481	COL1A1,COL1A2,COL3A1,SOX5
VWF	-0.668	other		0.422	0.00481	ANGPT2,F8,LGALS3,MYH11
cercosporin		chemical - endogenous non-mammalian		-0.283	0.00481	ACTA2,BIRC5,FN1,MYC
DCLK1	2.192	kinase		0.152	0.00481	MYC,SNAI1,TWIST1,ZEB2
miR-126a-3p (and other miRNAs w/seed CGUACCG)		mature microRNA		1.188	0.00481	IRS1,PIK3R2,SLC45A3,VEGFA
HAS2		enzyme		-0.283	0.00481	ACTA2,Ccl2,IL6,TIMP1	567 (16)
ING4	0.107	transcription regulator		-0.9	0.00481	Ccl2,CDKN1A,IL6,MYC	588 (15)
Mup1 (includes others)		other		1	0.00481	CYCS,FASN,PPARG,SCD
CDKN3	0.975	phosphatase			0.00481	CDK1,DLK1,MEST,PEG3
racemic flurbiprofen		chemical drug		1.033	0.00481	CCNB1,HPGD,PTGS2,THRSP	234 (7)
7,8-dihydro-7,8-dihydroxybenzo(a)pyrene 9,10-oxide		chemical toxicant		-0.95	0.00481	EGFR,PTGS2,RARB,VEGFA	735 (22)
ginsenoside Rb1		chemical - endogenous non-mammalian		0.651	0.00482	FASN,HBEGF,NGF,PGR,SCD	660 (13)
estrone		chemical - endogenous mammalian		1.421	0.00482	ABCG2,IL6,IRS1,IRS2,PGR	805 (23)
Rac		group			0.00482	BMP2,CD9,IL6,PTGS2,THBS2	620 (22)
NDUFA13	0.502	enzyme		-1.536	0.00482	BCL2,CCNB1,CDK1,DHFR,TK1	611 (17)
TNFRSF11B	-0.13	transmembrane receptor		-0.577	0.00482	Ccl2,IGF1R,IL6,SPP1,TNFRSF11A	517 (21)
RMRP		other		-0.277	0.00482	ALPL,CCNB2,FMNL2,PTHLH,RSAD2
LPAR1	-1.321	G-protein coupled receptor		0.391	0.00482	CACNA2D1,IL6,PTGS2,S1PR3,SPHK1	460 (17)
GTF2I	-0.319	transcription regulator			0.00482	CDKN1A,DNAAF4,KDR,MYC,THBS1	480 (7)
RALA	0.186	enzyme		0	0.00482	CDKN1A,MMP2,PLAUR,SNAI1,VEGFC	685 (18)
TFAP2B		transcription regulator		-0.447	0.00482	EPAS1,ERBB2,IGF2,MMP2,SLC19A1	541 (13)
FOXF2	1.242	transcription regulator	Activated	2.236	0.00482	ACTA2,ACTG2,MYH11,MYOCD,PDGFRA	440 (7)
SP7		transcription regulator			0.00482	ALPL,COL1A1,IL6,SOST,SPP1
ACE2		peptidase		-0.651	0.00482	ACTA2,Ccl2,CXCL3,FN1,IL6	392 (12)
asiatic acid		chemical reagent		-0.469	0.00482	BCL2,CCNB1,CDK1,CDKN1A,SMAD7	396 (7)
prostaglandin		chemical drug		-0.849	0.00482	HAPLN1,HSD11B1,LPL,PTGS2,VEGFA	742 (20)
onapristone		chemical drug		-1	0.00482	HBEGF,NPY1R,PGR,SPHK1,VEGFA	478 (19)
2-amino-5-phosphonovaleric acid		chemical - other		-0.17	0.00487	ADAMTS2,ANKRD37,ARID5A,ASB2,BID,DKK2,FURIN,GADD45A,GADD45G,HDAC9,KDR,LHFPL2,NPY1R,NR4A2,NRN1,NUDT4,PLEKHO1,PTGS2,RALGPS2,RGS2,SPATA13,WWOX	371 (12)
CYP1A1	4.098	enzyme	Activated	2.274	0.00489	ACOT11,CACHD1,CYP1A1,DAG1,HOXB9,Ifi27l2a/Ifi27l2b,LMNA,Mt1,Mt2,NQO1,PFDN1,RACGAP1,RGS16,SIDT2,TACC3,TMPO,TSC22D1	532 (10)
LTA		cytokine		1.667	0.00495	Ccl2,CCL21,EGFR,ERBB2,HDC,IL6,ITGB3,LYVE1,PDPN,PTGS2	480 (16)
JAG2	1.895	growth factor		-1.706	0.00497	BMP2,CCL5,CXCL3,CXCL6,IL10RA,IL13RA1,IL6,MIF,SPP1
CARM1	-0.281	transcription regulator	Activated	2.407	0.00497	Ccl2,CCNB1,CDKN1A,CXCL3,DHFR,EPHX2,GADD45A,MYC,STC2	741 (21)
paricalcitol		chemical drug		0.128	0.00497	BCL2,BMP2,Ccl2,COL3A1,FN1,PCNA,PTGER4,PTGS2,TIMP1	503 (16)
isobutylmethylxanthine		chemical toxicant		-0.401	0.00501	ACE,ANGPTL4,Ccl2,CD36,CDKN1A,DHFR,FABP4,IGF1R,IL2RG,INSR,LPL,MMP2,Mt1,Mt2,MYC,NR1H3,PDE3B,PGR,PLAT,PPARG,SCD,TIMP1,TIMP2	762 (23)
PTGER4	-0.799	G-protein coupled receptor	Inhibited	-2.347	0.00501	ADAMTS4,BRCA1,Ccl2,Ccl7,CH25H,Ctla2a/Ctla2b,DYRK1B,IFI16,IGF2BP2,IL6,LHFPL2,MMP2,NCF2,OLR1,PGR,PTGS2,RSAD2,RTP4,SAP30,SLAMF8,SPP1,USP18,XAF1	482 (18)
MAP3K8	0.812	kinase		1.033	0.00501	ACPP,ADCY7,ARHGAP22,BMP1,Ccl2,CXCL3,DNAJC2,DOK2,FAM107B,FSCN1,GPR160,HIP1,HTRA4,IGF1R,IL6,INHBA,KDM4A,NGF,PGR,PLAT,PTGER4,PTGS2,SLFN12L	656 (22)
hydroxyurea		chemical drug		1.434	0.00517	ABCB1,CCNB1,CDKN1A,GADD45A,GINS2,KRT18,MCAM,MYC,POLA2,RAD51,RRM2,TK1	672 (21)
PHF1	-0.25	transcription regulator			0.00522	CDKN1A,HOXA10,HOXB6,HOXB9,HOXD10,HOXD8,HOXD9	381 (14)
MST1		growth factor	Inhibited	-2.556	0.00522	BIRC5,IL6,IRF8,MST1R,PTGS2,SOX4,SPP1	722 (22)
NPR1	-0.647	enzyme		1.118	0.00522	ACE,COL1A1,COL3A1,FN1,MMP2,RCAN1,RGS4	297 (10)
arotinoid acid		chemical toxicant		-0.404	0.00522	CDKN1A,PTHLH,RARB,RARG,RARRES1,SCD,TK1	662 (20)
SPARC	-0.605	other		-1.826	0.00527	ACOT2,APH1B,BRCA1,COL1A1,COL1A2,CTSF,CYP1A1,FN1,FOXQ1,IL6,LOXL4,LYVE1,MMP2,MPZL1,SNAI1,SYDE2,WNK4,ZHX2	699 (24)
PSEN1	-0.181	peptidase		-1.326	0.00536	ABCG2,AMY2A,ATP1A2,ATP2A2,AXL,C1R,CCL5,CD74,CD9,Cox6c,CUEDC1,CYCS,CYFIP2,DBI,DPYSL2,EGFR,ENPP2,FZD4,GJA1,GNG2,GPM6B,HBA1/HBA2,Hbb-b1,Hbb-b2,HIST1H2BD,IL6,INSR,IRF5,LRP1,Meg3,MME,MYC,NCAM1,NDUFA8,NME1,Pcp4l1,PDGFRA,PDGFRB,PLVAP,PPARG,PRC1,PSEN2,PTGS2,RELN,RHOQ,S100B,STIM2,STMN1,TUBB6	655 (19)
Sb202190		chemical - kinase inhibitor		-1.147	0.00536	ABCB1,ANGPTL4,BCL2,BIRC5,Ccl2,CDKN1A,COL1A1,CYP1A1,FGFR2,FN1,HAPLN1,IL6,MMP2,PGR,PTGS2,PTHLH,RHOB,TIMP2,VEGFA,XDH	579 (17)
11,12-epoxyeicosatrienoic acid		chemical - endogenous mammalian		0.342	0.00539	EGFR,EPHX2,FABP4,NME1,PLAT,PPARG	563 (15)
CYB5R4	0.04	enzyme		-0.875	0.00539	CD36,FASN,LPL,Mt1,Mt2,SCD	347 (13)
ADRB1		G-protein coupled receptor			0.00539	ACTC1,COL3A1,Marcks,NGF,SMC4,THBS1	237 (7)
chitin		chemical - endogenous non-mammalian		1.725	0.00539	Ccl2,CCL5,IL33,IL6,Retnla,TSLP
finasteride		chemical drug		0	0.00539	BCL2,FLT1,IL6,KDR,TGFA,VEGFA	290 (7)
SOX9		transcription regulator		-0.161	0.00541	CDKN1A,COL1A1,COMP,CYP26B1,GAS7,HAPLN1,KLK3,LBP,PPARG,SMPD3,SOX5,TCF7L2,VEGFA	722 (24)
MKNK1	0.124	kinase		-0.093	0.00542	ACOT7,ARIH1,DPYSL3,ETS1,FLNA,GAP43,GNAI1,GNAQ,GPC4,HSPA4L,LAMB2,LCN2,MYC,PRKAR1B,SFRP1,THRA,TMBIM6
Hbb-b1	-3.292	transporter	Activated	2.324	0.00552	Ccl2,Ccl7,CD74,CMTM3,Cox6c,EGLN3,FN1,HFE,IL10RA,IL2RG,Mt1,NCF2,NDUFS8,RET,UCP2,VEGFC	502 (7)
NKX3-1	-1.247	transcription regulator		0.763	0.00553	ETS1,IGFBP3,KLK3,MMP23B,MYC,PIM1,SMAD1,SOX4,TWIST1,VAV3,VIL1	647 (24)
sodium arsenite		chemical drug		-0.969	0.00553	BCL2,BIRC5,CBS/CBSL,CDKN1A,FABP4,GADD45A,OLR1,PGR,PPARG,SLC18A2,VEGFA	516 (18)
(+)-fluprostenol		chemical drug			0.00555	FABP4,NR4A2,PPARG
L-aspartic acid		chemical - endogenous mammalian			0.00555	CDKN1A,PCNA,PRKAA2
Cpla2		group			0.00555	MYC,PTGS2,VEGFA	611 (18)
MCOLN2		ion channel			0.00555	Ccl2,CCL5,CXCL3
SULT2B1		enzyme			0.00555	BCL2,CCNB1,MYC	313 (7)
betulin		chemical - endogenous non-mammalian			0.00555	PTGS2,TIMP1,TIMP2	234 (7)
GLS	-0.37	enzyme			0.00555	ACTA2,COL1A1,FN1	482 (7)
TYMS	0.868	enzyme			0.00555	CDKN1A,MYC,TYMS
NACA	0.477	transcription regulator			0.00555	COL1A1,PDPN,SOST
WSB1	0.108	other			0.00555	CA9,SAP30,VEGFA	448 (7)
CITED1		transcription regulator			0.00555	ERBB2,IGF2,TGFA	586 (7)
CTSK	-0.169	peptidase			0.00555	Ccl2,IL6,PTGS2	281 (8)
beta-elemene		chemical - endogenous non-mammalian			0.00555	SNAI1,TWIST1,ZEB2
SRSF6	-0.079	other			0.00555	LMNA,TNC,VEGFA
CDC27	-0.021	other			0.00555	CCNB1,PLK1,UBE2C
Wfdc17		other			0.00555	Ccl2,IL6,MRC1
ELF2	-0.131	transcription regulator			0.00555	KLK3,LYN,TEK
JV-1-65 hGHRH(1-29)NH2		chemical reagent			0.00555	EGFR,IGF1R,IGF2	484 (7)
pyridoxal phosphate-6-azophenyl-2',4'-disulfonic acid		chemical reagent			0.00555	Ccl2,PTGS2,THBS1	517 (17)
AD-5057		chemical drug			0.00555	FABP4,HSD11B1,UCP2	655 (18)
retinaldehyde		chemical - endogenous mammalian			0.00555	BMP2,EGFR,IL6
floxuridine		chemical drug			0.00555	CCNB1,GADD45A,TYMS
Cdk		group	Activated	2.64	0.00578	CCL5,GADD45A,GADD45G,IL6,MYC,PLEKHF1,RGS2,UCP2	484 (7)
EZR	-0.457	other		-0.088	0.00578	BCL2,BIRC5,EIF4EBP1,IL6,MMP2,MYC,PTGS2,SMOC2	648 (21)
SAA1		transporter		-0.647	0.00578	BCL2,BGN,Ccl2,CCL5,MMP2,MRC1,PPARG,Retnla	653 (18)
CYBB		enzyme	Activated	2.137	0.00578	Ccl2,CCL5,COL3A1,CXCL3,DUOX2,IL6,PPARG,TNFRSF11A	599 (19)
NOX4	-1.272	enzyme	Inhibited	-2.043	0.00578	Ccl2,CDKN1A,EPAS1,FN1,MMP2,NOX4,TGFA,VEGFA	649 (22)
berberine		chemical drug		-0.536	0.00581	BCL2,BIRC5,CDKN1A,CLDN5,CYP1A1,ERBB2,FN1,IL6,INSR,MMP2,PCNA,PPARG,PTGS2,SPHK1,TIMP1,TSLP,UCP2,VEGFA	729 (21)
MTA1	-0.124	transcription regulator		-1.45	0.00581	ACTC1,ADRB2,BRCA1,Hbb-b1,MMP2,MYC,PGR,SERPINB1,SNAI1,TWIST1	685 (22)
KAT2B	-0.138	transcription regulator		1.176	0.00581	ABCB1,CDKN1A,COL1A2,FASN,KLF2,NR1H3,PTCH1,PTGS2,RARB,THRSP	729 (25)
OLR1	3.809	transmembrane receptor		1.129	0.00581	ACE,CD68,FN1,HAS3,IL6,NCF2,NOX4,OLR1,RARG,SPP1	592 (21)
cytokine		group	Activated	3.095	0.0059	ADAM12,ADAMTS4,ADORA2A,BCL2,BIRC5,CCL5,CXCL3,EFNA1,IL6,ITGA6,Ly6a (includes others),MMP2,MYC,NGF,PCNA,PLAT,PLAUR,PTGS2,PTHLH,S100A4,TEK,TIMP1,UPP1	474 (17)
EIF3E	0.181	other		0.396	0.00593	CD36,CDCA8,COL5A1,EPAS1,SMC2,SNAI1,THBS1,TNC,ZEB2
EED	0.124	transcription regulator		1.387	0.00593	EGFR,GATA4,GATA6,MMP2,MYC,PTGS2,TBX3,THY1,WIF1	648 (25)
FGFR3	-0.794	kinase		-0.555	0.00593	BMP2,CDKN1A,COL1A1,COL3A1,MAF,NOG,PROX1,SNAI1,SPP1	600 (20)
ABL1	-0.697	kinase		0.883	0.00593	ABL1,BMP2,CDKN1A,DHFR,GADD45A,MYC,NME1,TEK,VEGFA	694 (21)
eflornithine		chemical drug		-0.638	0.00593	CDK1,CDKN1A,DHFR,FN1,ITGB3,LGALS3,PCNA,PLK1,TYMS	818 (21)
miR-146a-5p (and other miRNAs w/seed GAGAACU)		mature microRNA		-1.765	0.00614	BRCA1,CD1D,CDKN3,COL13A1,CXCL3,EGFR,HEY1,IL6,IRF5,KIF22,LBP,METTL7A,MMP16,PBLD,PDGFRA,PGLYRP1	706 (18)
bromobenzene		chemical toxicant		1.246	0.00614	CDKN1A,FMO1,FMO3,GADD45A,Gsta4,Mt1,Mt2,MYC,NQO1,OXCT1,POR,TIMP1,TSC22D1
2-deoxyglucose		chemical drug		-0.1	0.00614	ABCB1,ABCG2,BCL2,BID,Ccl2,CCL5,CDKN1A,IL6,INSR,IRF8,MYC,PTGS2,SPP1	643 (21)
IL10		cytokine		0.772	0.00619	ABLIM3,ACTA2,ADM,BCL2,BMP2,BMP6,BMPR1A,Ccl2,CCL5,Ccl6,Ccl7,CD68,CDH13,CDKN1A,CLCA1,COL1A1,CSF2RB,CXCL3,CXCL6,FLRT2,GPRC5B,HDAC9,HPGD,IL10RA,IL17RA,IL33,IL6,IL7,LY75,MAF,MAP3K8,MMP2,MRC1,NOD2,PAM,PDCD1,PTGS2,RARRES1,RGS16,S100B,SLC6A4,TIMP1,TNFRSF11A,TWIST1,VCAN,VEGFA	702 (20)
TAC1		other		1.031	0.00622	Ccl2,CLEC11A,CXCL3,EGFR,HDC,IL6,LDB2,MME,NGF,NKX6-2,PLAT,PRKACA,PTCH1,PTGS2,SOX13	668 (17)
MAFB	0.297	transcription regulator		1.343	0.00622	ACTN1,ADA,ALCAM,CACNA2D3,CMKLR1,F2RL3,FBLN5,GATM,HS3ST1,HTR2B,LGMN,MTSS1,OLFML2B,OLFML3,RAB3IL1
LYN	1.994	kinase		-0.684	0.00622	ATP2A2,BCL2,BIK,BIRC5,Ccl2,CCL5,Ccl7,CDKN1A,CYCS,ETS1,IL6,MYC,SPHK1,TRAF1,TRAF5	676 (19)
flutamide		chemical drug		0.172	0.00622	BCL2,Ccl2,COL3A1,CYP1A1,CYP1B1,CYP4B1,FOXQ1,IL6,KDR,ME1,MKI67,NQO1,PTCH1,PTHLH,WIF1	855 (20)
CDX2		transcription regulator		1.317	0.00625	ABCB1,ALDH3A1,BCL2,BIRC5,CD9,CDKN1A,ETS1,FOXQ1,HEPH,HOXB9,HOXD8,LAMC2,MYC,NR2F2,NTS,PARD3,SNAI1,SOX5,STK11,SYNPO,TCF7L2,USP12	552 (13)
TGM2	-0.131	enzyme		0.787	0.00638	ALPL,ATP1B3,CD36,CD74,CDCA7,DAPK2,FN1,GIMAP6,GJA1,HIP1,IGF1R,IL10RA,IL6,ITGA6,ITGB3,KIAA0513,MMP2,MORC2,MYC,NCF2,PDGFRB,PIM1,POR,SEMA6B,SIRPA,SLC16A1,SLC27A2,SLC7A2,SPP1,THBS1,XAF1	634 (21)
NCOA2	-0.311	transcription regulator		0.985	0.00639	BMP2,Ccl2,CCL5,CDKN1A,CYP1A1,ELOVL6,FABP4,FASN,FRZB,FST,IL6,KLK3,LPL,PGR,PPARG,PPP1R3C,PTGS2,RET	837 (23)
TRIM28	-0.329	transcription regulator		-1.091	0.00639	COL4A6,EFEMP1,EPAS1,ETS1,Hbb-b1,IL6,KLF2,MMP2,NRXN2,RCAN1,S100A4
3-methylcholanthrene		chemical toxicant	Activated	2.049	0.00639	ABCB1,ADM,CD36,CYP1A1,CYP1B1,ME1,Mt1,Mt2,NQO1,POR,PTGS2	737 (17)
MAC		complex		0.342	0.00654	BCL2,FN1,ITPRIP,PTGS2,RGS16,SPP1,THBS1	672 (22)
LTF	-0.214	peptidase		1.408	0.00654	Ccl2,CCL5,CDKN1A,CXCL3,IL6,PGR,TK1	616 (19)
ECSIT	0.24	transcription regulator		1.937	0.00654	IL6,NFKBIE,NR4A2,PIM1,PLAUR,PTGS2,TRAF1	557 (16)
CCR1		G-protein coupled receptor		1.294	0.00654	ATP6V0D2,Ccl2,CCL5,ITGB3,MMP2,SPP1,TNFRSF11A	564 (21)
WR 1065		chemical drug		1.04	0.00654	CDKN1A,GADD45A,KDR,MYC,NME1,S100A4,VEGFA	738 (21)
lactacystin		chemical - protease inhibitor		-0.55	0.00655	ADRB2,ASNS,ATP1A1,ATP6V0A1,BIK,BRCA1,Ccl2,CD9,CDKN1A,CYP1A1,ERBB2,FOSL1,GJA1,GNAI1,GP1BA,HMGB2,IGFBP5,IL6,IRS1,IRS2,MMP2,NR1H3,PTGS2,RAD51,RANBP1,STMN1,THRB,VAV3	740 (20)
arsenic trioxide		chemical drug		0.445	0.00665	ATP1A2,ATP1B2,ATP1B3,ATP2B1,AURKA,BCL2,BLVRB,CDK1,CDKN1A,DBF4,ECT2,EIF2AK3,EPAS1,FADS1,FAIM,FASN,FN1,HBA1/HBA2,HYOU1,IP6K2,MAF,ME1,mir-24,MKNK2,MYC,NDUFA8,NDUFC2,NFE2L1,NQO1,NR2F2,PCNA,PIK3R2,PIM1,PPARG,PTGS2,RARB,SCD,SHMT1,SKIL,SQLE,TYMS,VEGFA	654 (24)
KDM3A	-0.258	transcription regulator		0.514	0.00672	ACTA2,ADM,MYC,MYH11,PCNA	290 (7)
48s		complex		-1.109	0.00672	BCL2,IGF1R,MYC,NKX6-2,VEGFA
PURA	-0.444	transcription regulator			0.00672	ACTA2,CDKN1A,DHFR,MYC,SPN	508 (12)
ZBTB33	0.227	transcription regulator		-0.152	0.00672	BID,CDKN1A,MYC,RAPSN,S100A4
TIMP2	-0.984	other		-0.348	0.00672	CDKN1A,MMP2,RECK,TIMP2,VEGFA	521 (21)
SPTLC2	0.098	enzyme		1.342	0.00672	COL1A1,EIF2AK3,MMP2,THBS1,TIMP1	584 (10)
MIR101		group		-0.314	0.00672	BCL2,CDH5,CLDN5,PTGS2,STMN1	275 (7)
miR-223-3p (miRNAs w/seed GUCAGUU)		mature microRNA		0.555	0.00672	IRS1,RHOB,SCN3A,SLC2A4,STMN1
miR-19b-3p (and other miRNAs w/seed GUGCAAA)		mature microRNA		1.109	0.00672	BIRC5,HIPK3,NR4A2,THBS1,VEGFA	419 (7)
TBX3	1.626	transcription regulator		-1.452	0.00672	GATA6,GJA1,GJA5,JDP2,SCN5A
INSIG2	-0.026	other		1.528	0.00672	ELOVL6,FASN,GPAM,INSIG1,SCD	485 (9)
HOXB4	-0.09	transcription regulator		1.342	0.00672	FOSL1,ITGB3,MYC,PGR,RARB	344 (6)
NRP1	-0.719	transmembrane receptor		0.152	0.00672	ACTA2,BCL2,IL6,RCAN1,SLC27A3	619 (19)
GNA13	-0.224	enzyme		-1.091	0.00672	ACTA2,CNN1,MYH11,PTGS2,VEGFA	703 (25)
CNOT3	-0.131	other		-1.387	0.00672	EBF1,LEPR,MYC,TNFRSF11A,UCP2
RND3	-0.507	enzyme		0.083	0.00672	BCL2,CDKN1A,HEY2,MMP2,PTGS2	617 (18)
TOPBP1	-0.119	other		-0.937	0.00672	ABL1,CDKN1A,GADD45A,IGFBP3,MYC	588 (16)
BTC	0.738	growth factor		-0.447	0.00672	EREG,FASN,IL6,IRS2,PTGS2	732 (23)
perindopril		chemical drug		-1.067	0.00672	ACE,ACTA2,IL6,NGF,VEGFA	428 (12)
N-ethyl-N-nitrosourea		chemical toxicant			0.00672	CDKN1A,Mt1,Mt2,SERPINA1,SPP1
Fcer1		complex	Activated	2.453	0.00675	ATP2A2,Ccl2,CCL5,Ccl7,CXCL3,IL33,IL6,INHBA,MRC1,NFATC2,S1PR2,SPHK1	484 (21)
ciprofibrate		chemical drug		1.396	0.00678	ABCB1,ACOT2,AIG1,CD36,CSTB,CYP7B1,DBI,EGFR,FABP4,FAH,HSD11B1,LCN2,LPL,NR1H3,PPARG,RPL12,SCD,SELENBP1,SERPINA1,SLC16A1,SLC4A4,SLCO2B1	433 (18)
IDH1	0.177	enzyme		0.816	0.00679	CREB3L1,EPAS1,FABP4,FASN,FN1,LPL,PPARG,PTCH1,SLC2A4,ZEB2	392 (13)
KLF15	-0.936	transcription regulator		-0.716	0.00679	CD36,CMKLR1,FABP5,FASN,GPAM,GPR1,PPARG,SCD,SLC2A4,SYNPO	634 (19)
RHOA	-0.145	enzyme		0.549	0.00694	ACTA2,BCL2,CCNB1,CDKN1A,COL1A1,COL3A1,DYRK1B,ECT2,ERBB2,FN1,IL6,ITGB5,ITGBL1,RHOB,SDC2	667 (20)
IL1RN		cytokine		-1.053	0.00698	ACTA2,CXCL3,EIF2AK3,H6PD,HDAC9,HSD11B1,IGFBP5,IL6,NGF,PTGS2,RARRES1,RSAD2,RTP4,SLC6A4,SPP1,TCF7L2,TIMP1,USP18,VEGFA,VEGFC	546 (17)
budesonide		chemical drug		0.151	0.00699	Ccl2,CCL5,CDKN1A,ECT2,GNA14,GNAI1,GNAQ,IL6,LDB2,MAF,PCNA,PRKACA,PRKCQ,RGS5	685 (18)
ELF4	-0.329	transcription regulator	Activated	2.828	0.007	ABCB1,CDKN1A,DUSP5,HDC,KLF2,NDUFS8,RCAN1,SPP1	369 (7)
PAK1	-0.095	kinase		0.05	0.007	BCL2,CCNB1,CDKN1A,FN1,FOSL1,MYC,PGR,VEGFA	646 (21)
green tea polyphenol		chemical drug		1.069	0.007	ANXA1,CDKN1A,IGFBP3,IL6,MMP2,PPARG,PTGS2,VEGFA	748 (24)
daunorubicin		chemical drug		0.748	0.007	ABCA2,ABCB1,ABCC9,CDKN1A,EPS8,GATA4,IL6,MYC	725 (24)
salinosporamide A		chemical drug		-1.72	0.007	BCL2,BIRC5,MYC,PTGS2,SNAI1,TRAF1	528 (10)
FUT8	-0.289	enzyme		1	0.007	CYP1B1,ELN,GAS1,MGAT3,SMAD7,SQLE	109 (7)
ITGA9	-1.23	other		0.734	0.007	ACTA2,Ccl2,CXCL6,IL6,SNAI1,TNC	583 (19)
CDK8	-0.553	kinase			0.007	ANKRD37,MYC,PCNA,RARB,STC2,UHMK1	376 (7)
SMARCC1	-0.069	transcription regulator		0.08	0.007	CDKN1A,EBF1,KDR,KLK3,NCOA1,VPREB1	639 (13)
RNASEH2A	0.394	enzyme			0.00703	CTSF,IFI16,Ifi27l2a/Ifi27l2b,IFITM3,IL6,IRF5,PTGS2,RSAD2,USP18
IRS2	-1.605	enzyme		1.41	0.00703	FABP4,FASN,GSK3A,IRS1,LPL,MYC,PPARG,THRSP,VEGFA	656 (23)
laminaran		chemical drug		1.066	0.00703	EREG,G0S2,INHBA,OLR1,PTGS2,RSAD2,SGPP2,TNC,TRAF1
TLR9		transmembrane receptor	Activated	3.539	0.00713	ADAMTS4,ARRDC4,BCL2,Ccl2,CCL5,Ccl7,CCNB1,CD5,CERK,CXCL3,CXCL6,FURIN,IFI16,IL10RA,IL33,IL6,KDELR3,LCN2,Marcks,MYC,NTS,PFKFB3,PTGS2,RSAD2,SPHK1,SPRY1,ST3GAL5,TIMP1,TNC,TSLP,USP18,VAV2	647 (17)
glutamine		chemical - endogenous mammalian		-1.089	0.00729	ACTA2,ACTC1,ADA,ASNS,ASS1,COL1A1,FABP5,FN1,GADD45A,IGF2,IL6,MYC,PCNA,PTGS2,SLC16A1,THBS2,VEGFA	723 (23)
THPO	-0.118	cytokine		-0.346	0.00735	AURKA,AURKB,BIRC5,CCNB1,GP1BA,Hbb-b1,ITGB3,KDR,MYC,PIM1,VEGFA	688 (21)
CYP1B1	-1.499	enzyme		0.905	0.00735	ACOT11,CACHD1,CYP1B1,Ifi27l2a/Ifi27l2b,MCAM,Mt1,Mt2,NQO1,RAD51,RGS16,SIDT2	596 (14)
glucagon		biologic drug		-0.458	0.00735	ANK3,CARD14,KIF26A,LMNA,MME,NR4A2,PALM,SLC2A4,SLC43A2,SORT1,TNS1	196 (7)
5,6-epoxyeicosatrienoic acid		chemical - endogenous mammalian			0.00738	FABP4,PLAT
PD158780		chemical - kinase inhibitor			0.00738	HBEGF,TWIST1	338 (7)
arbutin		chemical drug			0.00738	CDKN1A,PTGS2
monooleylphosphatidic acid		chemical - endogenous mammalian			0.00738	ENPP2,EREG
MICU1		other			0.00738	BCL2,CYCS
15-LOX		group			0.00738	CD36,PPARG	230 (7)
Rab5		group			0.00738	ADRB2,IL6	297 (8)
DF 203		chemical drug			0.00738	CYP1A1,CYP1B1
SOCS7	-0.266	other			0.00738	IRS1,PPARG
FBXO44	-0.032	enzyme			0.00738	ADRB2,BRCA1
RBM17	0.25	other			0.00738	ERBB2,FN1
RETSAT	0.166	enzyme			0.00738	FABP4,PPARG
RNF126	-0.18	enzyme			0.00738	BRCA1,CDKN1A	553 (16)
soy isoflavones		chemical drug			0.00738	MKI67,PTGS2
afatinib		chemical drug			0.00738	ABCG2,TYMS
CTS-1027		chemical drug			0.00738	ACTA2,COL1A1
NOSIP	0.249	other			0.00738	BCL2,MYC
dibromoacetic acid		chemical toxicant			0.00738	IGF2,MYC
AR-12		chemical - kinase inhibitor			0.00738	EGFR,LCN2	532 (11)
IBSP		other			0.00738	MMP2,THBS1	100 (3)
PRKCSH	-0.453	enzyme			0.00738	PKD1,PKD2
AMD1	0.23	enzyme			0.00738	MYC,Tmsb4x (includes others)	520 (7)
miR-185-3p (and other miRNAs w/seed GGGGCUG)		mature microRNA			0.00738	MYC,NTRK2
mir-331		microRNA			0.00738	MYC,PLAUR
mir-383		microRNA			0.00738	MYC,RBMS1
TPPP3	1.588	other			0.00738	ADRB2,TPPP3
EIF4E2	-0.043	translation regulator			0.00738	EGFR,PDGFRA
DHFR	0.727	enzyme			0.00738	DHFR,mir-24
HOXD4	0.664	transcription regulator			0.00738	HOXD10,RARB
SEC63	-0.198	transporter			0.00738	PKD1,PKD2
poly-L-glutamic acid-peptoid 1 conjugate QM56		chemical reagent			0.00738	Ccl2,CCL5	355 (11)
LAMC2	1.421	other			0.00738	LAMC2,MMP2
WASHC1		other			0.00738	EGFR,MYC	338 (7)
ATP9A	0.772	transporter			0.00738	VEGFA,VEGFC
ADAMTS13		peptidase			0.00738	ANGPT2,LGALS3
NPAS3		transcription regulator			0.00738	FGFR1,RELN
GPBP1	0.04	transcription regulator			0.00738	ADA,TOP2A
ADAMTS5	1.613	peptidase			0.00738	BGN,VCAN
PLCD4		enzyme			0.00738	EGFR,ERBB2
CDK11B		kinase			0.00738	KLK3,VEGFA	441 (7)
EXOC7	0.117	transporter			0.00738	SNAI1,ZEB2
RPS19	0.42	other			0.00738	CD74,MIF
1,1-bis(3'-indolyl)-1-(4-hydroxyphenyl)methane		chemical reagent			0.00738	BCL2,BIRC5
4-[(4'-chloro-2'-fluoro)phenylamino]-6,7-dimethoxyquinazoline		chemical - kinase inhibitor			0.00738	ANGPT2,KDR	134 (4)
alpha-endosulfan		chemical toxicant			0.00738	CYP1A1,PGR
sepiapterin		chemical - endogenous mammalian			0.00738	KDR,LCN2	497 (7)
incyclinide		chemical drug			0.00738	PTGS2,TYMS
dibenzo(a,l)pyrene		chemical toxicant			0.00738	CYP1A1,CYP1B1
tyrphostin AG 1295		chemical - kinase inhibitor			0.00738	ACTA2,MYH11	327 (9)
oleylamide		chemical - endogenous mammalian			0.00738	LPL,PPARG
5-oxo-6-8-11-14-(e,z,z,z)-eicosatetraenoic acid		chemical - endogenous mammalian			0.00738	ENPP3,MYC
S-adenosylhomocysteine		chemical - endogenous mammalian			0.00738	COL1A1,COL1A2
KB-R7785		chemical - protease inhibitor			0.00738	EGFR,HBEGF
LINC01139		other		1	0.00748	ANGPTL4,ANKRD37,IGFBP3,SLC16A3	480 (7)
FFAR1		G-protein coupled receptor		0.762	0.00748	CD36,CYP1A1,FABP4,IRS2	699 (25)
ANG	-0.138	enzyme			0.00748	BCL2,CCL5,CDKN1A,IL6	648 (23)
LGALS8	0.086	other		1.934	0.00748	CCL5,CDKN1A,CXCL3,IL6	744 (22)
LINC00963		other		0.119	0.00748	BCL2,EGFR,FN1,IL6	417 (7)
RLIM	-0.194	enzyme		-0.577	0.00748	CDKN1A,FN1,SKIL,SMAD7	220 (9)
AMBP		transporter		-1.091	0.00748	ACTA2,Ccl2,CXCL3,ITIH5	541 (20)
RAMP1	-0.623	transporter		0	0.00748	FLT4,IL6,VEGFA,VEGFC	712 (21)
FRMD6	-0.538	other		1.067	0.00748	BMP2,CDKN1A,IGFBP3,RASSF8
PRKRA	0.427	other		0	0.00748	MAF,NKX3-1,RET,THBS1
GPC1	-0.432	transmembrane receptor		1	0.00748	EFNA1,ITGB3,PTGS2,VEGFA	478 (15)
alpha-santalol		chemical reagent		-0.132	0.00748	BRCA1,CCNB1,CDK1,CDKN1A
PPP5C	0.172	phosphatase		-0.152	0.00748	CD36,CDKN1A,FABP4,MYC	710 (24)
premarin		chemical drug		0	0.00748	BCL2,BIRC5,MYC,PGR	590 (12)
(5-(4-N-methyl-N(2-pyridyl)amino)ethoxy)benzyl thiazolidine-2,4-dione		chemical reagent		0	0.00748	COL1A1,FABP4,PC,SCD	313 (7)
tiron		chemical reagent		0	0.00748	CDKN1A,IL6,PLAUR,TNC	627 (19)
SU1498		chemical - kinase inhibitor		-1	0.00748	ANGPT2,ETS1,FABP4,VEGFA	532 (22)
TAPI-1		chemical - protease inhibitor		-1.067	0.00748	Ccl2,LEPR,MMP2,OLR1	503 (12)
sphingomyelin		chemical - endogenous mammalian		0	0.00748	ELOVL6,FASN,NR1H3,SCD
S-equol		chemical drug			0.00748	IL6,MMP2,PGR,PLAT	593 (16)
acetaminophen		chemical drug		1.989	0.00756	ABCB1,ABCG2,AK4,BCL2,Ccl2,CDKN1A,CXCL3,FLT1,FLT4,GADD45A,HMGCS2,IGF1R,IGFBP3,IL6,IRS1,KDR,ME1,Mt1,MYC,NQO1,PCNA,PLAUR,PTGS2,Retnla,SLC27A2,VEGFA	642 (19)
25-hydroxycholesterol		chemical reagent		1.745	0.00768	APOD,ASNS,EIF2AK3,FASN,FOSL1,IL6,INSIG1,NR4A2,PTCH1,PTGS2,SCD,SV2A	363 (17)
RARG	-0.691	ligand-dependent nuclear receptor		0.108	0.00771	BMP2,CHST10,COL4A1,CYP26B1,FOXC1,GAP43,GATA4,HOXA10,IGFBP6,IL6,KLK3,LAMB1,Meis1,MYC,RARB	754 (20)
BSG	-0.066	transporter		0.503	0.00788	ABCG2,CXCL3,CXCL6,EIF2AK3,EPAS1,KDR,MMP2,PLAUR,PLK1,VEGFA	671 (21)
FOSL2	0.092	transcription regulator		1.117	0.00788	BRCA1,COL1A2,DIO2,FOSL1,HPGD,MMP2,S100a7a,SOX4,TIMP1,TK1	660 (14)
TNFSF12	-0.115	cytokine	Activated	2.729	0.00802	ADAM12,BST1,Ccl2,CCL5,Ccl7,CD68,CXCL3,CXCL6,CYCS,HEY1,HEYL,IL6,JAG2,KLF15,SLC2A4,TIMP1,TSLP	474 (18)
ELOVL5	-0.052	enzyme		1.858	0.00808	ELOVL6,FADS1,FADS2,FASN,GPAM,HMGCS2,SCD	595 (20)
PRKAR2B	0.83	kinase	Activated	2.621	0.00808	CDK1,NR4A2,NTS,PCNA,PPARG,PRKAR2B,TOP2A	504 (15)
phorbol 12,13-didecanoate		chemical toxicant		-0.52	0.00808	ABCB1,CDK1,CDKN1A,CYCS,MYC,PTH1R,SMAD1	668 (20)
CLOCK	0.378	transcription regulator		-0.821	0.00819	AK4,ANGPTL4,ARHGEF10,CPD,DTX4,DUSP8,EGFR,ELOVL6,FAM107A,FASN,GADD45A,GJA1,GNPTAB,HIPK3,HMGCS2,IGFBP5,LYPD6,MBTPS1,MEST,MKNK2,NFIL3,PDGFRB,PER1,POR,POU6F1,RGS5,SCD,ST3GAL5,THBS1,Tnfsf9,TRIL,UHMK1,WNK4,ZDBF2	375 (9)
ATF1	-0.131	transcription regulator			0.00828	ATP1A1,BCL2,FOSL1,INHBA,NTS,PCNA,PDE3B,PTGS2,THBS1	338 (11)
fasudil		chemical drug		0.517	0.00828	ACTA2,BCL2,BMP2,Ccl2,IL6,MIF,MMP2,MRC1,MYH11	542 (19)
SAHM1		chemical reagent		-0.426	0.00828	ABLIM1,ANKRD37,DTX1,FLNA,MYC,PFKFB3,PPARG,RHOBTB1,SUSD4
S-nitrosoglutathione		chemical toxicant		1.269	0.00828	CCL5,CDKN1A,GJA1,IRS1,IRS2,NQO1,PPARG,PTGS2,S100A10	814 (26)
TFDP1	0.061	transcription regulator		1.98	0.00841	CDK1,CDKN1A,DHFR,FGFR1,FGFR2,MYC,RANBP1,STMN1	434 (12)
diclofenac		chemical drug		-0.063	0.00841	CDKN1A,HPGD,IL6,MYC,PTGS2,TMEM100,VEGFA,VEGFC	642 (18)
SN-38		chemical drug		-0.682	0.00841	BMP6,CCNB1,CDKN1A,EGFR,ERBB2,GNG11,MYC,TTK	735 (19)
MAPKAPK2	-0.791	kinase		0.531	0.00842	Ccl2,Ccl7,CXCL3,HDC,IL6,MMP2,MRC1,PLAT,Retnla,TOP2A,TSC22D1	639 (17)
EFNA2		kinase		-1.265	0.00842	DCBLD2,FABP5,FOSL1,FOXQ1,KLK3,KRT18,NFIL3,NKX3-1,PLAT,PTHLH,UBE2C
luteolin		chemical drug		-0.98	0.00842	BCL2,BIRC5,CYP1A1,IGF1R,IL6,IRS1,MMP2,MYC,NR2F2,PTGS2,VEGFA	706 (22)
DUSP1	-0.189	phosphatase		-1.012	0.00842	BCL2,BMP2,Ccl2,CFB,COL3A1,CXCL3,EGFR,FOSL1,IL6,MRC1,NRP1,OLR1,PAQR7,PLAT,PLAUR,PTGS2,SYNPO,VEGFC	596 (19)
entinostat		chemical drug		1.633	0.0087	ADAMTS5,BCL2,BIK,BIRC5,CDKN1A,EGFR,ERBB2,IGFBP3,LYVE1,MMP2,PCNA,THBS2	743 (21)
IFN alpha/beta		group	Activated	2.723	0.00872	ARHGEF10,AXL,BID,CCL5,FGL2,GAS7,IFI16,Ifi27l2a/Ifi27l2b,IL6,IL7,IRF8,Ly6a (includes others),MRC1,RSAD2	669 (17)
IRF5	1.165	transcription regulator	Activated	2.872	0.00872	BID,CCL21,CCL5,CDKN1A,COL1A1,COL3A1,COL4A1,DAPK2,IFITM3,IL6,IRF5,RSAD2,TMPO,VEGFA	674 (14)
Calcineurin protein(s)		complex		0.876	0.00878	ATP2A2,BCL2,CCL5,CXCL3,mir-24,NFATC2,NFATC4,NFIL3,NR4A2,PTGS2,RCAN1,RGS2,SPP1	598 (19)
ELAVL1	-0.371	other	Activated	2.542	0.00881	CDKN1A,CENPA,CENPE,FLNA,IL6,KHSRP,KIF18A,MYC,NCAPG,NEK2,PBK,PCOLCE,PRC1,PTGS2,PTHLH,TOP2A,VEGFA	698 (23)
miR-7a-5p (and other miRNAs w/seed GGAAGAC)		mature microRNA		1.756	0.00894	EGFR,IGF1R,IRS1,IRS2,MKNK2,SYNE1
miR-204-5p (and other miRNAs w/seed UCCCUUU)		mature microRNA		-0.64	0.00894	ATP2B1,AURKB,BMP1,PPARG,SOX4,TRPS1
TRPC1	-1.116	ion channel		-0.199	0.00894	CDH5,CDKN1A,KDR,S1PR3,SPHK1,TRPC1	273 (7)
GADD45A	0.773	other		0.059	0.00894	BCL2,CDKN1A,CXCL3,IL6,NEK2,PCNA	667 (22)
FSHB		other		1.325	0.00894	EGFR,FABP5,INHBA,ITGB3,ITGB5,PLAT	319 (7)
beta-glycerophosphoric acid		chemical - endogenous mammalian		1.195	0.00894	ALPL,BMP2,CCNB2,CDKN1A,PTGS2,SPP1	209 (7)
agmatine		chemical - endogenous mammalian		1.793	0.00894	BMP2,KDR,PCNA,PPARG,SLC22A4,UCP2	635 (16)
selenomethylselenocysteine		chemical - endogenous mammalian		0	0.00894	ATP1A1,ATP1B3,CXCL3,FABP4,PLAUR,TIMP2
14,15-epoxyeicosatrienoic acid		chemical - endogenous mammalian		-0.277	0.0091	EGFR,FABP4,NME1,PLAT,TNFRSF11A	734 (20)
epothilone B		chemical drug		-1.432	0.0091	CDK1,CDKN1A,MKI67,THBS1,TOP2A	468 (7)
Diphtheria Toxin		chemical reagent		-0.555	0.0091	Ccl2,COL1A2,COL3A1,EGFR,HBEGF	371 (9)
Ren2		peptidase			0.0091	COL3A1,CYCS,SPP1,TIMP1,VEGFA	436 (13)
Stat5 dimer		complex		1.109	0.0091	BCL2,EBF1,IGF2,IGFBP3,MYC
HOXA11	-0.219	transcription regulator		-0.537	0.0091	ANXA1,EGFR,ITGA8,KLF2,NRCAM
miR-100-5p (and other miRNAs w/seed ACCCGUA)		mature microRNA		0.77	0.0091	FGFR3,IGF1R,IGF2,PLK1,RPTOR
mir-218		microRNA		1.505	0.0091	FZD4,LOXL4,PDGFRA,VAV3,ZEB2
STK3	-0.058	kinase		-1.109	0.0091	BIRC5,IL6,PDPN,SOX4,SPP1	586 (12)
SMURF2	-0.665	enzyme		0.152	0.0091	AXIN1,FN1,SKIL,SMAD1,SMAD7	526 (14)
TARBP2	0.339	other		-0.447	0.0091	MAF,MYC,NKX3-1,RET,THBS1
GFAP		other		-1	0.0091	CREB3L1,ITGA2,ITGA6,ITGA7,KCNJ2
NDN	-0.261	transcription regulator		-1.109	0.0091	CDK1,CDKN1A,DLK1,MYC,PPARG	483 (14)
101.10 peptide		chemical reagent	Inhibited	-2.232	0.0091	Ccl2,GJA1,IL6,OXTR,PTGS2	682 (19)
cyclopiazonic acid		chemical - endogenous non-mammalian		0.468	0.0091	BCL2,Ccl2,IL6,S100B,TRPC3	557 (18)
2-acetylaminofluorene		chemical toxicant		0.588	0.0091	ABCB1,BCL2,CDKN1A,CYP1A1,DLK1	670 (20)
Hedgehog		group		-0.647	0.00911	FOXC2,GAS1,GATA4,GATA6,IGF2,KLK3,MYC,PTCH1,SPP1,VIL1	201 (6)
EGR2	0.479	transcription regulator		-0.626	0.00934	ASS1,BCL2,CAMK4,CDH6,CDKN1A,DIO2,ERBB2,IGF2,KDR,LAMA2,MAPK8IP1,MME,MYC,PLCL1,PTHLH,ROBO1,SCD,SLC12A2,SLC16A1,SMAD1,SQLE,VEGFA,ZEB2	776 (20)
SIRT6	-0.211	enzyme		0.054	0.0096	BIRC5,Ccl2,ELOVL6,FASN,IGF1R,IL6,IRS2,NAPEPLD,NPNT,PTGS2,SCD	719 (23)
miR-145-5p (and other miRNAs w/seed UCCAGUU)		mature microRNA		1.166	0.0096	ACTA2,ACTG2,DDR1,FSCN1,IGF1R,IRS1,MYC,MYH11,MYOCD,ROBO4,VASN	592 (7)
thioctic acid		chemical drug		-1.3	0.0096	ANGPT2,BCL2,Ccl2,FABP4,IL6,LPL,MMP2,MYC,NQO1,TIMP2,UCP2	741 (20)
PIK3CG		kinase		-0.64	0.00969	ABCB1,ATP6V0D2,BCL2,CD74,IL17RA,IL6,ITGB3,PGR,TK1	709 (20)
GABPA	-0.104	transcription regulator		0.97	0.00969	AURKA,BRCA1,CYP7B1,NQO1,OXTR,PPARG,ROBO4,SOD3,TNC
ARHGAP21	-0.449	other	Activated	3	0.00969	ARID5A,BATF,FGL2,HDC,PLAT,PTGS2,SLFN12L,TCF4,TSC22D1
FFAR3		G-protein coupled receptor		1.648	0.00971	CBS/CBSL,CCL21,ENPP2,EYA1,FADS2,Foxp2,KLF15,PITPNM2,PITPNM3,RCN1,RELN,SGIP1,SMOC1,Zfp872
infliximab		biologic drug	Inhibited	-2.173	0.00982	BATF,BMP2,Ccl2,G0S2,INHBA,MYO1B,PTGS2,SLC27A2,SPHK1,TRAF1,TTK,VEGFA	751 (21)
NOD2	-0.704	other	Activated	2.527	0.00984	ARL5C,BMP2,CCL5,CXCL3,IL6,KLF2,MAP3K8,MARCKSL1,NR1H3,RASGRP3,SLC2A6,TRAF1,TWIST1	394 (13)
cyclophosphamide		chemical drug		1.394	0.00984	BCL2,GAP43,IL6,LAMC2,LGALS3,Ly6a (includes others),MYC,NGF,SPP1,THBS1,TIMP1,TSPAN8,UPP1	652 (21)
L-arginine		chemical - endogenous mammalian		-1.069	0.00988	ASS1,BCL2,BGN,DAG1,FN1,IL6,PCNA	754 (22)
MEF2		group		-1.41	0.00988	KLF2,MEOX2,MYH11,MYOCD,PDE3A,PTGS2,SLC2A4	175 (6)
MYBL1		transcription regulator			0.00988	BCL2,CKLF,MYC,NEK2,RALGPS2,TBL2,UBE2T
miR-26a-5p (and other miRNAs w/seed UCAAGUA)		mature microRNA		-1.824	0.00988	CDKN1A,CXCL3,HPGD,MYC,PGR,PTGS2,SMAD1	245 (7)
chrysotile asbestos		chemical toxicant		1.915	0.00988	Ccl6,CCNB2,CDC20,CKS2,CLCA1,IL6,TIMP1	681 (19)
dichlorovinylcysteine		chemical toxicant		-0.993	0.00988	EGFR,HBEGF,IGF1R,IL6,SLC27A2,SORD,TGFA
nitroarginine		chemical reagent	Activated	2	0.00988	ALOX12,HTR2B,NCAM1,NFIL3,PLAT,SLC2A4,SPP1	288 (7)
Pka		complex	Activated	2.157	0.0099	ANTXR1,BIRC5,CAMK4,CCNB1,CDKN1A,GJA1,IGF1R,IL6,KCNB1,MEST,NGF,NR4A2,NTS,OXTR,PLD1,PRKCZ,PTGS2,PTHLH,RGS2,TSLP,XAF1	821 (22)
8-bromoguanosine 3',5'-cyclic monophosphate		chemical - kinase inhibitor		0.397	0.01	BMP2,CDKN1A,PLAUR,S100A10,SLC12A5,SNAI1,SOD3,VEGFA
SERPINE1	-0.219	other		-0.022	0.01	ACTA2,DLK1,FLT1,FN1,GAP43,IL6,ITGB3,PLAUR
miR-182-5p (and other miRNAs w/seed UUGGCAA)		mature microRNA		0.863	0.01	CLDN15,COL4A4,GADD45G,IGF1R,MTSS1,NCAM1,PGF,RARG
IGFBP3	1.319	other		-0.483	0.01	BCL2,CCL5,CDK1,CDKN1A,LYVE1,SDC2,THBS2,TNC
MMP2	-0.928	peptidase		0.928	0.01	BMP2,CDKN1A,CLDN5,CSF2RB,EGFR,FN1,IL2RG,MYC
TNFRSF1A	-0.055	transmembrane receptor	Activated	2.056	0.01	ANGPT2,Ccl2,CCL5,CD36,CD68,CDKN1A,CXCL3,DIO2,EFNA1,FLT1,IL6,ITGB5,KDR,LATS2,LBP,LCN2,MMP2,NQO1,PIM1,RGS7,TGFA,TRAF1,VEGFA
CDKN1B	0.286	kinase		-1.801	0.01	BCL2,CDKN1A,CSDC2,FHL1,GAB2,GAP43,LGALS3,MMP16,MRRF,MYC,NFATC2,PCNA,PDCD1,SHMT1,SMAD7,TCF4,TK1,TWIST1
SOD2	0.118	enzyme		-0.418	0.0101	ACPP,ASB4,ATP1A1,BCL2,CCNB1,CDKN1A,IL6,IL7,JDP2,MLXIP,MMP2,MYC,PTGS2,SORT1,SPEG,UCP2
alpha-estradiol		chemical - endogenous mammalian			0.0104	KLK3,PGR,VEGFA
Rp-8-pCPT-cGMPS-triethylamine		chemical reagent			0.0104	CDKN1A,S100A10,SOD3
exisulind		chemical drug			0.0104	CDKN1A,PCNA,PGR
teichoic acid		chemical - endogenous non-mammalian			0.0104	IL6,MMP2,PTGS2
P110		group			0.0104	BCL2,COL4A1,IL6
PADI4		enzyme			0.0104	CDKN1A,GADD45A,OSGIN1
CPXM1	-1.163	peptidase			0.0104	COL16A1,COL5A1,COL6A1
WDFY2	-0.249	other			0.0104	CYCS,FASN,SLC2A4
AQP11	0.636	transporter			0.0104	EGFR,MYC,TIMP1
ZMYND10		other			0.0104	MMP2,THBS1,VEGFA
RO4929097		chemical drug			0.0104	HEY1,HEYL,KDR
GSK690693		chemical drug			0.0104	ERBB2,IGF1R,INSR
Ampa Receptor		complex			0.0104	EGFR,ERBB2,NGF
OPRK1		G-protein coupled receptor			0.0104	KDR,NRP1,SLC6A4
DLX4		transcription regulator			0.0104	BRCA1,TOP2A,VEGFA
THBS2	-1.18	other			0.0104	Ccl2,HEY1,MMP2
erismodegib		chemical drug			0.0104	MMP2,SNAI1,TWIST1
EFEMP1	0.981	enzyme			0.0104	FBLN5,SMAD7,VEGFA
ELP1		other			0.0104	FLT1,TEK,VEGFA
TADA3	0.061	transcription regulator			0.0104	CDKN1A,PGR,RARB
LRIG1	-0.613	other			0.0104	BCL2,EGFR,ERBB2
HTRA1	-0.886	peptidase			0.0104	EGFR,GDF6,HTRA1
EFNB1	0.167	other			0.0104	BCL2,EPHB3,TEK
CASP2	-0.282	peptidase			0.0104	BID,BIRC5,NCAM1
glaucocalyxin A		chemical - endogenous non-mammalian			0.0104	IL6,LCN2,PTGS2
Fructus xanthii aqueous extract		chemical - endogenous non-mammalian			0.0104	CD36,FASN,SCD
carboxymethylflavin		chemical - endogenous mammalian			0.0104	MMP2,PTCH1,TIMP1
formylmethylflavin		chemical - endogenous non-mammalian			0.0104	MMP2,PTCH1,TIMP1
BARD1		transcription regulator			0.0104	AURKB,BRCA1,CYP1A1
OBP2B		transporter			0.0104	FASN,PPARG,SCD
CIMO		chemical reagent			0.0104	BCL2,BID,BIRC5
acetazolamide		chemical drug			0.0104	AQP1,EIF2AK3,SLC26A4
emricasan		chemical drug			0.0104	ACTA2,COL1A1,CXCL3
10-(6'-ubiquinonyl)decyltriphenylphosphonium		chemical drug			0.0104	EGFR,IL6,KDR
eprosartan		chemical drug			0.0104	COL1A1,COL3A1,FN1
benz[a]anthracene		chemical toxicant			0.0104	ALDH3A1,CYP1A1,CYP1B1
Ki16425		chemical reagent			0.0104	PTGS2,S1PR3,SPHK1
aurintricarboxylic acid		chemical drug			0.0104	IGF1R,PIM1,PTN
MIR17-92		group			0.0104	FZD4,PKD1,PKD2
Z-IETD-FMK		chemical - protease inhibitor			0.0104	EGFR,PLD1,SPHK1
lumichrome		chemical - endogenous non-mammalian			0.0104	MMP2,PTCH1,TIMP1
zofenopril		chemical drug			0.0104	Ccl2,IL6,TIMP1
TIMP3	-0.304	other		0.508	0.0105	IL6,LAMC2,LTBP1,MMP2,SKIL,SMAD1,SMAD6,SMAD7,THBS1,ZEB2
ADRB2	2.634	G-protein coupled receptor		0.563	0.0105	ANGPT2,ATP1A1,COL1A1,CYP1B1,FASN,IL6,MME,NRP1,PLXNA1,SPP1
TFRC	0.494	transporter		-0.426	0.0108	CCNB1,CDC20,CDK1,CDKN1A,GADD45A,GAS7,LY75,ME1,PFKFB3,PPARG,PTN,SRXN1,STC2,SULF2
POLR2A	-0.342	enzyme			0.0109	ANKRD37,ANO1,CDKN1A,GATA4,Hbb-b1,KLK3,MYC,STC2,Tmsb4x (includes others),UHMK1,VEGFA
DDIT3	0.355	transcription regulator		1.724	0.011	ASNS,BCL2,DCTPP1,FN1,GPC6,H6PD,IL6,ITGA2,LCN2,LOX,LTBP3,PCNA,PDPN,PER1,PLAT,PPARG,RGS4,THBS2
sorbitol		chemical - endogenous mammalian			0.011	AQP1,GJA1,RGS7,SORD
coal tar		chemical drug		1	0.011	CYP1A1,CYP1B1,NQO1,PTGS2
Traj18		other		-1.091	0.011	Ccl2,CCL5,CXCL3,IL6
HSP90AA1	0.038	enzyme			0.011	BIRC5,CYP1B1,FN1,GJA1
CIC	-0.172	transcription regulator			0.011	ETV1,FOSL1,ITGA2,SPRED2
SFRP4	-1.162	transmembrane receptor			0.011	BIRC5,FN1,MYC,TWIST1
TBX1	0.705	transcription regulator			0.011	CDKN1A,FLT4,GBX2,PAX9
MAS1		G-protein coupled receptor		-1.154	0.011	Ccl2,IL6,MRC1,Retnla
PNPT1	0.093	enzyme			0.011	CCL5,CDKN1A,IL6,MYC
MYZAP		other		0.762	0.011	ATP2A2,DES,DSP,GJA1
meloxicam		chemical drug		0.278	0.011	ABCB1,CDKN1A,HPGD,PTGS2
manumycin A		chemical reagent		-0.218	0.011	FN1,PLD1,PTGS2,VEGFA
rosmarinic acid		chemical - endogenous non-mammalian			0.011	ACTA2,IL6,MMP2,PTGS2
phospholipid		chemical - endogenous mammalian		1.997	0.011	Ccl2,CCL5,CXCL3,PTGS2
theophylline		chemical drug		0.686	0.011	HS3ST1,IL6,LRP1,THBS1
PTPN11	0.163	phosphatase		-1.239	0.011	ATP2A2,CD68,CDKN1A,FASN,GP1BA,IL6,KDR,NCF2,PDGFRB,PERP,PIM1,PLAUR,TP53I11
bortezomib		chemical drug		1.562	0.011	ALPL,ASF1B,BCL2,BIK,BIRC5,BRCA1,Ccl2,CCL5,CCNB1,CDKN1A,CSF2RB,EIF2AK3,ERBB2,GADD45A,IGF1R,IGFBP3,IL33,IL6,IRS1,MYC,MYOCD,NOX4,PCNA,PGR,PTCH1,PTGS2,RAD51,RSAD2,SERPINA3,SRXN1,VEGFA
GHRL		growth factor		-0.774	0.0111	BCL2,FASN,GPAM,IL6,LPL,NGF,PPARG,PRKAA2,PTGS2,SCD,SPP1,UCP2
pregna-4,17-diene-3,16-dione		chemical - endogenous non-mammalian		-0.73	0.0112	BCL2,BIRC5,MYC,PPARG,PTGS2,VEGFA
CTR9	-0.095	other		-0.447	0.0112	CLCA2,CYP1A1,EPAS1,Meis1,MYC,PGR
HSPA9	-0.148	other		0.555	0.0112	CDKN1A,HOXD10,MYC,NAV2,RARB,RET
CYP7A1		enzyme	Inhibited	-2.425	0.0112	Ccl2,CYP7B1,FASN,IL6,PTGS2,TIMP1
dipyridamole		chemical drug		0.128	0.0112	IL6,MMP2,PTGS2,SPP1,TIMP1,TIMP2
APLN		other		-1.18	0.0113	BCL2,HBA1/HBA2,IRS1,KDR,LYL1,MYC,NOSTRIN,SPN,TEK
ZNF106	-0.774	other	Inhibited	-2.478	0.0113	ACTC1,ALDH3A1,HBA1/HBA2,Hbb-b1,Ifi27l2a/Ifi27l2b,IFITM3,LGALS3,SERPINA3,SSPN
gentamicin		chemical drug		0.983	0.0114	ABAT,ALCAM,ALDH1A1,ALPL,AQP1,CBS/CBSL,Ccl2,CD9,CYP1A1,ENPP2,EPHX2,FMO1,GADD45A,GATM,GNL3,HYOU1,IGFBP3,LCN2,MAF,MGMT,MPST,MYC,NEURL3,NME1,PC,PSAT1,PTH1R,PTN,SPP1,THY1,TIMP1,TSC22D1
SLC13A1		transporter		0.775	0.0115	ALDH1A1,ELOVL6,G0S2,GPAM,GPC6,HNMT,INSIG1,ITIH3,KHDRBS3,Mt1,NRN1,SCD,SLC16A1,SLC38A4,SPP1
xanthohumol		chemical drug		0.378	0.0118	ANXA1,BIRC5,FASN,GAB2,LY96,MYC,NQO1,SCD
PIAS1	-0.011	transcription regulator		-0.053	0.0118	ACTA2,CDK1,CDKN1A,FASN,GADD45A,KLF2,MYH11,SCD
F7		peptidase		1.8	0.0118	FOSL1,GADD45A,HBEGF,IL6,MYC,PLAUR,PTGS2,VEGFA
pentoxifylline		chemical drug		-1.607	0.0118	Ccl2,CCL5,COL1A1,CXCL3,IL6,POSTN,TIMP1,VEGFA
S-nitroso-N-acetyl-DL-penicillamine		chemical reagent		0.342	0.0119	BCL2,BIRC5,CCNB1,MYC,NPR2,SPP1,TIMP1
anakinra		biologic drug			0.0119	ASB4,ATP6V0A1,GRINA,HBA1/HBA2,IL6,PIM1,PTGS2
SIAH2	-0.291	transcription regulator			0.0119	ACPP,DBI,EGLN3,KLK3,MME,NKX3-1,PDE9A
urethane		chemical toxicant		0.309	0.0119	CDKN1A,CYP1A1,KDR,MYC,PCNA,PTGS2,SFRP1
3-deoxy-2-octulosonic acid(2)-lipid A		chemical - endogenous non-mammalian		1.342	0.012	Ccl2,CH25H,IL6,PTGS2,SQLE
ZC3H14	-0.237	other		1.342	0.012	BATF,FGL2,PLAT,TSC22D1,USP12
FZD9	-0.605	G-protein coupled receptor	Activated	2.216	0.012	Ccl2,CCL5,CXCL6,IFI16,Ifi27l2a/Ifi27l2b
miR-199a-3p (and other miRNAs w/seed CAGUAGU)		mature microRNA		-1.457	0.012	FN1,ITGA6,PTGS2,SMAD1,VCAN
ITGB6		other		-0.903	0.012	COL1A1,COL1A2,COL3A1,MMP2,PTHLH
NBEAL2	-0.344	other	Inhibited	-2.236	0.012	Ccl7,CKLF,CXCL3,IRF8,THBS1
TOR1A	0.292	enzyme			0.012	MPST,Nrgn,PDE10A,SNCG,STON2
SDCBP	0.421	enzyme		0.08	0.012	EGFR,MMP2,SNAI1,SOX4,TCF4
GRN	-0.305	growth factor		-0.865	0.012	BCL2,Ccl2,FZD2,IL6,VEGFA
nimesulide		chemical drug		0.105	0.012	BIRC5,CYP1A1,EREG,PCNA,PTGS2
decursin		chemical - endogenous non-mammalian		-1	0.012	ANGPT2,CDKN1A,FASN,KDR,MYC
pirfenidone		chemical drug		1.973	0.012	COL3A1,FN1,POSTN,SMAD3,SNAI1
isoliquiritigenin		chemical - endogenous non-mammalian			0.012	BCL2,CDKN1A,IL6,MMP2,PTGS2
SP110	0.047	transcription regulator		-1.606	0.0122	CD74,ETS1,IFITM3,LMNA,LY96,MTHFR,MYC,NFATC2,NFIL3,PANX1,PDGFC,PERP,PLK1,PPARG,SERPINA1,SOX4,STIM1,TIMP1,WWOX
reactive oxygen species		chemical toxicant		1.079	0.0122	ACTA2,BCL2,CCL5,CDKN1A,DUSP2,EGFR,EIF4EBP1,ERBB2,ETS1,GADD45A,HBEGF,HPSE,IL6,ITGB3,MYC,PTGS2,RARB,UCP2,VEGFA
GPS2	0.301	transcription regulator		0.606	0.0123	Ccl2,CDKN1A,FZD1,IL6,MYC,PGR,PID1,RAB20,RHOB,SLC44A1,TRERF1
CHD4	-0.151	enzyme		0.333	0.0123	AS3MT,CASQ1,CDA,CDKN1A,DUOX2,Hbb-b1,SFRP4,SMOC1,SPRY1,SQLE,TIMP2
CUX1		transcription regulator		-0.911	0.0123	CCL5,CDKN1A,ECT2,ERBB2,FLNA,MMP2,MYC,NCAM1,RACGAP1,SNAI1,THBS1
ursolic acid		chemical drug		-0.801	0.0123	BCL2,CDKN1A,EIF4EBP1,FASN,MKI67,MMP2,MYC,OLR1,PPARG,PTGS2,SLC6A9
estradiol benzoate		chemical drug		0.921	0.0124	Ccl2,GJA1,NPY1R,NQO1,OXTR,PAQR8,PGR,PLAT,PTGER4,PTGS2,RARB,SLC2A4
Igm		complex			0.0124	BCL2,BIK,BIRC5,CD5,CDKN1A,CYCS,DUSP2,MYC,PIM1,SAMSN1,TRAF1,TRAF5
ATP		chemical - endogenous mammalian		1.918	0.0126	ADAMTS9,BIRC5,Ccl2,CXCL3,FLNA,FZD8,HBEGF,IL33,IL6,LCN2,MYC,NRP1,PTGS2,SPHK1,THBS1,TRPC3,TSLP
CALCA		other		0.547	0.0127	ANK3,CARD14,COL3A1,FLT1,IL6,KDR,KIF26A,LMNA,MKI67,MME,PALM,SLC2A4,SLC43A2,SORT1,TNS1
5-O-mycolyl-beta-araf-(1->2)-5-O-mycolyl-alpha-araf-(1->1')-glycerol		chemical - endogenous non-mammalian		1.604	0.0132	ADAMTS5,ADORA2A,CD1D,CMKLR1,CXCL3,FABP4,HBEGF,NLRC3,PLA2G7,PTGS2,RCAN1,RGS16,SPHK1,TRAF1
tunicamycin		chemical - endogenous non-mammalian	Activated	2.517	0.0135	ABCB1,ABCG2,ASNS,ATP2A2,AXL,Ccl2,CD36,CDKN1A,CLDN5,CXCL3,EIF4EBP1,ETS1,HAPLN1,HCN2,HSD11B1,IL6,MTHFR,MYC,NR1H3,PCNA,PPARG,PTGS2,S100A4,SCD,TBCB,TGFA,VEGFA
CYP19A1		enzyme		0.295	0.0136	BCL2,EGFR,FASN,IL6,IRS1,LPL,PCNA,PGR,PPARG,SLC27A2,SLC2A4,TGFA,VEGFA
CCL5	2.71	cytokine		1.416	0.0136	ALCAM,Ccl2,CCL5,CXCL3,CYP1B1,HDC,HMGA1,IL6,NCOR2,OLR1,PLAUR,SQLE,THBS1
FANCC	0.392	other		-1.89	0.0139	ANKRD6,CDK1,CYP7B1,FGFR1,FZD2,FZD4,IGFBP3,MAPK8IP1,MTUS2,PTGS2,SFRP1,TAX1BP3
KDM2B	-0.055	enzyme		0	0.0139	Ccl2,CCL5,Ccl7,CDKN1A,GATA6,PDGFRA,RIPK3,SFRP2
CIDEC		other		-1.42	0.0139	Ccl2,CYCS,DIO2,FASN,FOXC2,IL6,PPARG,SCD
steroid		chemical - endogenous mammalian		0.557	0.0139	ANXA1,CCL5,GAP43,MYC,PLAT,SPP1,TIMP1,TNC
dexamethasone phosphate		chemical drug		0.816	0.0139	GADD45G,IL6,LYVE1,Mt1,PLEKHF1,THBS1
zerumbone		chemical - endogenous non-mammalian		-1.664	0.0139	BCL2,BIRC5,IL6,MYC,PTGS2,TRAF1
Ikb		group		1.387	0.0139	BCL2,CCNB1,CFB,CXCL3,IL6,PTGS2
TRPS1	-0.794	transcription regulator		0.128	0.0139	ALPL,DPEP2,GABRA3,KCNMA1,Ptprd,SMPD3
mir-221		microRNA		-0.23	0.0139	KDR,KLK3,MEOX2,MGMT,MMP2,ZEB2
PSMD10	0.741	transcription regulator		0.447	0.0139	CDKN1A,EIF4EBP1,FNBP1,IL6,MRAS,PCNA
MECOM	-0.335	transcription regulator		1.982	0.0139	CDKN1A,GADD45G,ITGA6,ITGB3,Ly6a (includes others),SKIL
chelerythrine		chemical drug		0	0.0139	Ccl2,CXCL3,IGF1R,IL6,PIM1,VEGFA
SB 290157		chemical reagent		0.816	0.0139	BMP1,CXCL3,IL6,PTGS2,SPP1,THBS1
HDAC5	-0.4	transcription regulator		0.059	0.0139	ACTA2,CDKN1A,HMGCS2,KLF2,LPL,MYC,PPARG,PYGM,SCD,SLC2A4,TWIST1
HIC1	1.186	transcription regulator		0.506	0.0139	ACTA2,ADRB2,AMIGO2,CDKN1A,CYP7B1,FADS1,FST,INHBA,LCN2,MCAM,SPP1
carbon monoxide		chemical - endogenous mammalian		-0.105	0.0139	ADORA2A,BCL2,CDKN1A,FN1,IL6,IRF8,NCF2,NQO1,PLAUR,PTGS2,VEGFA
uric acid		chemical - endogenous mammalian		0.867	0.014	ACE,ANXA1,BCL2,BRCA1,Ccl2,CCL5,CDCA8,CXCL3,IL6,ITGB3,NFKBIE,PTGS2,RAD51,TTK,TYMS
Ifnar		group	Activated	2.881	0.014	AXL,Ccl2,CCL5,Ccl7,CD74,IFI16,IFITM3,IL6,IRF8,RSAD2,SPP1,UNC93B1,USP18,XAF1,ZBP1
mir-210		microRNA		0.612	0.014	ABCB9,ABL1,DHFR,EFNA3,ELK3,EPHA3,FGFRL1,KDR,LHFPL6,MIB1,NCAM1,NPTX1,PDXK,TCF7L2,TP53I11
trinitrobenzenesulfonic acid		chemical reagent	Activated	2.003	0.014	ADAM12,BST1,Ccl2,CCL5,Ccl7,CD68,COL1A1,COL1A2,COL3A1,CXCL3,CXCL6,IL6,LCN2,PTGS2,TIMP1
NANOG		transcription regulator		1.649	0.0142	ABCB1,BIRC5,CCDC85A,COL3A1,GATA4,GATA6,GBX2,GMFG,HOPX,IER5L,IGF1R,KDR,LYN,NKX2-3,NPTX1,NRIP1,RIPPLY3,S100A6,TBX3
MEF2A	0.068	transcription regulator		-1.809	0.0143	ACTC1,ATP2A2,KLF2,MEOX2,MYOCD,SLC2A4,SOST
IDR-1002		chemical reagent		-0.728	0.0143	Ccl2,CCL5,Ccl6,Ccl7,CXCL3,CXCL6,IL6
PBX1	0.627	transcription regulator			0.0143	ANGPT2,CDKN1A,COL1A1,ETV1,Meis1,NCF2,TCF7L2
IL7	2.191	cytokine		0.328	0.0144	BCL2,Ccl2,CDKN1A,COL1A1,CXCL3,DUSP5,EBF1,FN1,IL6,IL7,KLF2,Ly6a (includes others),LYN,MAF,MYC,PDCD1,PIM1,RGS16,SMAD7,SMURF2,UPP1
maslinic acid		chemical - endogenous non-mammalian		0.816	0.0146	ACTN1,AMY2A,BCL2,BID,ETS1,FZD7,IL2RG,NFKBIE,PLAUR,PRKACA,PRKAR2B,PTGS2,RPS6KA2,THBS1
cocaine		chemical drug		-0.683	0.0146	ADORA2A,BCL2,CACNA2D1,Ccl2,CLSTN1,DUSP5,DYNLL1,EFNB2,FOSL1,GADD45A,IL6,INHBA,IRS2,LAMC2,MEST,MKNK2,MNS1,NACC1,NTS,PDXK,PER1,PRKACA,Sik1,THBS1,UBASH3B,VEGFA
PROC		peptidase		-0.234	0.015	ACE,ANGPT2,Ccl2,CXCL3,IL6,MMP2,PCNA,TEK,THBS1
Hbb-b2	-3.292	other	Activated	2.121	0.015	Ccl2,Ccl7,CD74,CMTM3,FN1,HFE,IL10RA,IL2RG,NCF2
TFE3		transcription regulator		0.174	0.015	CYCS,FASN,INSIG1,IRS2,KLF2,POLA2,SCD,SMAD7,THRSP
SB 216763		chemical toxicant		0.174	0.015	FASN,FSCN1,IL6,MYC,MYH11,NR4A2,PTGS2,RGS2,SCD
corticosterone		chemical - endogenous mammalian		-0.741	0.0152	ANXA1,ATP1A1,ATP2B1,BCL2,Ccl2,CDKN1A,CLDN5,DIO2,FASN,GPAM,HSD11B1,IL6,MYC,NOX4,PTGS2,RELN,SFRP1,UCP2
embelin		chemical - endogenous non-mammalian		-0.132	0.0153	BCL2,BIRC5,MYC,PPARG
SULF2	-1.102	enzyme		-0.849	0.0153	ADAMTS5,BCL2,NOG,SMAD1
LAMTOR1		other		-1	0.0153	FASN,NRP1,SCD,SQLE
STAR	-0.42	transporter	Inhibited	-2	0.0153	CCL5,CD36,NR1H3,SPP1
JUP	-0.254	other		1.067	0.0153	BCL2,MYC,NME1,NRCAM
FOXF1		transcription regulator		-0.887	0.0153	ACTG2,ITGB3,MYH11,PDGFRA
DBI	0.707	other		0.577	0.0153	ELOVL6,FASN,PPARG,SQLE
ITGA3	-0.411	other			0.0153	FN1,ITGA2,MMP2,PTGS2
TGFBR3	-0.064	kinase		-1	0.0153	BCL2,COL4A6,SNAI1,TWIST1
ELN	-1.708	other			0.0153	ELN,FN1,IL6,MMP2
8-hydroxyeicosapentaenoic acid		chemical - endogenous mammalian		1	0.0153	ANGPTL4,FABP4,IL6,PPARG
GREM1		other			0.0153	CDKN1A,COL1A1,ELN,RET
edaravone		chemical drug		-1.982	0.0153	Ccl2,CXCL3,IL6,PTGS2
D-sphingosine		chemical - endogenous mammalian	Activated	2	0.0153	BCL2,Ccl2,IL6,PTGS2
15(S)-HETE		chemical - endogenous mammalian		-0.87	0.0154	FABP4,FOSL1,MMP2,PPARG,PTGS2
8-(4-chlorophenylthio)-guanosine-3', 5'-cyclic monophosphate		chemical reagent		-0.2	0.0154	Ccl2,Ccl7,CDKN1A,IL6,PPARG
Fgfr		group		0.277	0.0154	BIRC5,FGFR1,HEY1,HEY2,SPP1
hemoglobin		complex		0.447	0.0154	ADM,CDKN1A,IL6,ME1,NQO1
ALDH1A1	-1.799	enzyme		-0.314	0.0154	BMP2,FABP4,FASN,PPARG,ZNF423
LYL1	-0.639	transcription regulator		0.106	0.0154	ANGPT2,BRCA1,CDH5,ITGA2,RAPGEF2
ADRB3		G-protein coupled receptor		1.965	0.0154	ADRB2,Ccl2,IL6,PTGS2,UCP2
CREB3L1	-0.912	transcription regulator		0.277	0.0154	AGR2,COL1A1,COL1A2,SLC1A4,SPP1
superoxide		chemical - endogenous mammalian		-0.555	0.0154	FN1,IL6,MARCKSL1,PTGS2,TIMP1
ellagic acid		chemical - endogenous non-mammalian		-0.447	0.0154	BCL2,CDKN1A,NQO1,PTGS2,RECK
arecoline		chemical drug		0.277	0.0154	ERBB2,IL6,PGF,S100A4,SLC2A4
vanadate		chemical - other		-1.498	0.0154	INSR,LCK,PGR,SLC2A4,VEGFA
SHC1	-0.167	other		0.537	0.0155	BCL2,CDKN1A,FST,HMGB2,HS3ST1,KLF2,NQO1,PCNA,S1PR2,TEK
mir-27		microRNA	Activated	2.243	0.0155	ABCB1,BIRC5,BMP2,BMPR1A,CDH5,EGFR,FLT1,IL6,PPARG,PTGS2
DETA-NONOate		chemical reagent		0.769	0.0155	BGN,CA9,CDKN1A,CXCL3,IL6,MYC,PDE3B,PTGS2,SOD3,TIMP1
miR-21-5p (and other miRNAs w/seed AGCUUAU)		mature microRNA		1.499	0.0157	ACTA2,CDH5,CDKN1A,HIPK3,KDR,MMP2,RECK,SMAD7,SOD3,SOX5,SPRY1
Hif1		complex		0.049	0.0157	ADM,BCL2,BIRC5,CA9,EPOR,FN1,KCNB1,SLC16A1,SLC16A3,TWIST1,VEGFA
DICER1	-0.229	enzyme		0.03	0.0157	ANGPT2,ANGPTL4,APOD,CDKN1A,EPHA3,ERBB2,EYA1,GNG2,IGF2,IGF2BP2,IRF8,ITGA2,ITGA6,KDR,LCP1,LHFPL6,LPAR3,LRP5,MAF,MCAM,MYC,PRKCQ,RBM38,RET,RFTN1,RGS5,SBDS,SEMA3C,SERPINA1,SERTAD4,SFRP4,SLC4A4,SPN,SYNPO,TEK,THBS1,TRPC3
IL7R		transmembrane receptor		-0.659	0.016	BAIAP2,BCL2,C1orf116,CD5,EBF1,ETNK2,IL6,IL7,LHX6,PCSK6,PIM1,REEP1,SPON1,UST
PNPLA2	-0.35	enzyme		0.647	0.0162	ACOT2,CD36,FASN,INSR,IRS1,PPARG,UCP2,ULK1
GNB1	-0.324	enzyme			0.0162	CDKN1A,CXCL3,JAG2,MBTPS1,MYH11,NR4A2,PLK2,PTGER4
CGS 21680		chemical reagent		-0.463	0.0162	ADORA2A,Ccl2,CCL5,COL3A1,PTGS2,RGS2,RGS4,VEGFA
cyclopamine		chemical reagent		0.861	0.0162	BCL2,CDKN1A,MKI67,PTCH1,PTGS2,SMO,SMPD3,SPP1
RAS		group		0.541	0.0166	AURKA,B4GALT1,BCL2,CDKN1A,FN1,FOSL1,HMGA1,MMP2,MYC,MYH11,PAK4,PLAUR,PLD1,PSMD10,PTGS2,SNAI1,TFPI2,UPP1,VEGFA
CBFB	0.092	transcription regulator		-1.035	0.0167	FABP4,HEY1,HTRA1,KCNK5,KLK3,LGMN,NRP1,PDE3B,PPARG,PTGER4,SMURF2,SPP1,TBL2
KEAP1	-0.062	transcription regulator		-0.294	0.017	ATP6V0D2,BCL2,IL6,MST1R,NQO1,PPARG,TOP2A
PPP3R1	-0.554	phosphatase		-0.378	0.017	ADRB2,AQP1,ATP2A2,CACNB2,DLK1,SCD,SLC12A5
BMP		group	Activated	2.219	0.017	DPYSL2,GATA4,IL6,KDR,SMAD1,SPP1
calpain		complex		0.652	0.017	CAMK4,CCL5,CUL9,GJA1,IL6,NTRK2
TEAD1	0.152	transcription regulator		-0.555	0.017	ACTA2,DES,GSK3A,LATS2,PTGS2,TGFA
HSD17B4	0.075	enzyme		-0.128	0.017	ACOT2,BMP2,CD36,FASN,PTCH1,PTGS2
BTG2	-0.109	transcription regulator			0.017	BRCA1,CXCL3,NCAM1,NOX4,NQO1,RARB
BAG1	0.132	other		1.057	0.017	BCL2,CDKN1A,EGFR,GADD45A,KLK3,PTGS2
UCN-01		chemical drug		0.496	0.017	BCL2,CDKN1A,PLK1,PRKCQ,RHOB,RRM2
GABA		chemical - endogenous mammalian		-0.816	0.017	FN1,MMP2,NTRK2,PTGS2,VEGFA,VEGFC
pasireotide		biologic drug			0.017	BMPR1A,SMAD6,SMAD7
sesamol		chemical - endogenous mammalian			0.017	CD68,IL6,PGR
Sphk		group			0.017	IL33,IL6,MBTPS1
Smad1/5/8-Smad4		complex			0.017	PTGS2,SMAD6,SMAD7
DGAT2	0.465	enzyme			0.017	GPAM,SCD,UCP2
SNED1	-1.011	other			0.017	AMY2A,IGFBP3,SLC2A4
QRFP		other			0.017	CD36,LPL,PPARG
ZNF521	1.022	transcription regulator			0.017	PPARG,TNFRSF11A,ZNF423
APC (complex)		complex			0.017	CCNB1,PLK1,UBE2C
iguratimod		chemical drug			0.017	Ccl2,CXCL3,IL6
PCM1	-0.037	other			0.017	CDKN1A,MKI67,PCNA
Collagen type III		complex			0.017	GP1BA,ITGA2,ITGB3
SERPINC1		enzyme			0.017	HSPG2,IL6,MIF
WNT2	4.108	cytokine			0.017	BIRC5,NOX4,TK1
CCL18		cytokine			0.017	MMP2,S100A4,SNAI1
GNE	-0.214	kinase			0.017	ASNS,JDP2,ST3GAL5
CCNA2	0.662	other			0.017	CDKN1A,DHFR,PCNA
PTN	4.534	growth factor			0.017	DLK1,ITGB3,PTPRZ1
KCNMA1	-1.736	ion channel			0.017	KCNMA1,KCNMB1,MMP2
TMPO	-0.619	other			0.017	COL1A1,COL3A1,TIMP2
PROK1		growth factor			0.017	PTGS2,RCAN1,SPHK1
LPAR2		G-protein coupled receptor			0.017	FN1,IL6,PTGS2
MIB1	-0.82	enzyme			0.017	HEY1,HEY2,HEYL
ITGB1BP1	0.095	transporter			0.017	CDKN1A,HEY1,HEY2
TRPA1		transporter			0.017	CXCL3,IL6,NGF
Ptgs2os2		other			0.017	Ccl2,CCL5,TRAF1
glyceraldehyde-BSA		chemical reagent			0.017	CDKN1A,FASN,PPARG
methylglyoxal-BSA		chemical reagent			0.017	CDKN1A,FASN,PPARG
MFAP2	0.886	other			0.017	ITGB3,PTCH1,VCAN
N-methyl mesoporphyrin IX		chemical reagent			0.017	CCNB1,HMGA1,MYC
dacarbazine		chemical drug			0.017	CCL5,CDKN1A,VEGFA
diquat		chemical toxicant			0.017	Mt1,Mt2,NQO1
phytoestrogen		chemical drug			0.017	BMP2,PGR,SFRP2
7SK		other			0.017	GPM6B,PLK2,THBS1
2-(tridec-12-yn-1-ylthio)acetic acid		chemical reagent			0.017	CYCS,LPL,UCP2
BMP type I receptor kinase inhibitor compound A		chemical - kinase inhibitor			0.017	BMP2,FRZB,VEGFA
leucovorin		chemical - endogenous mammalian			0.017	CDK1,CDKN1A,TYMS
rutin		chemical toxicant			0.017	BCL2,PTGS2,SLCO2B1
atropine		chemical drug			0.017	CHRM3,PTGS2,VEGFA
tyrphostin AG825		chemical - kinase inhibitor			0.017	CDKN1A,ERBB2,SNAI1
phosphatidic acid		chemical - endogenous mammalian			0.017	IGF2,MYC,PTGS2
S-allyl-L-cysteine		chemical - endogenous non-mammalian			0.017	ACTA2,FASN,PTGS2
mercury		chemical toxicant			0.017	Mt1,PGR,PLAT
ADRA1B		G-protein coupled receptor			0.0172	CDKN1A,COL3A1,FABP5,FN1,IL6,LOX,NR4A2,TMPO,VEGFA
cytochalasin D		chemical toxicant		0.38	0.0172	ACTA2,HOXB6,IL6,INSR,MMP16,MMP2,PTGS2,SOX5,TIMP2
JAK1/2		group	Activated	2.309	0.0172	BAIAP2,Ccl2,CD74,FAM107A,IL6,NPTX1,NPTXR,Nrgn,PDE2A,PLAC8,RSAD2,WIPF3
miR-141-3p (and other miRNAs w/seed AACACUG)		mature microRNA		-0.598	0.0172	BST1,COL1A2,CYP1B1,DACH1,FOXF2,GADD45A,GRB7,LHX6,PERP,RHPN2,SNAI1,ZEB2
HSF1	0.224	transcription regulator		-1.368	0.0175	ABCB1,Abi3bp,BCL2,CDK1,CELSR1,CKS2,COL6A2,DPT,EFEMP1,FASN,FBLN1,FMOD,HSPA4L,IL6,ITGB5,LAMA4,LSM2,NCOR2,NFATC2,POLA2,POSTN,SEMA3A,SEMA3C,SLIT3,VCAN,XAF1
F2RL1	-0.002	G-protein coupled receptor		1.216	0.0175	ACTA2,HBEGF,IL6,IRF8,PTGS2,RARG,TGFA,TSLP,VEGFA,VEGFC,WWOX
PLAG1		transcription regulator		0.668	0.0176	AQP1,BCL2,CNKSR1,CREB3L1,IGF2,MAPK11,MLXIP,NPTXR,TRAF1,VEGFA
FGF10		growth factor		0	0.0176	ANXA1,BMPR1A,CYP1B1,FGFR2,PERP,PTGS2,S100A6,SCD,SNAI1,TSPAN8
mir-24	0.919	microRNA		1.019	0.0176	CDKN1A,FN1,FURIN,IL6,JPH2,KDR,MAF,MYC,NDST1,PAK4
4-phenylbutyric acid		chemical - endogenous mammalian		-1.267	0.0176	BCL2,Ccl2,CCL5,CDKN1A,EIF2AK3,FABP4,GJA1,IL6,MMP2,OLR1,PSMD10,PTGS2,SERPINA1,TIMP2
DMRT1		transcription regulator			0.0183	ALDH1A1,BMPR1A,CADM1,COL4A3,FGFR2,Gsta4,IGF1R,IGFBP3,IGFBP6,Meis1,MMP16,NR1H3,PRG2,PRKAR2A,RET
fingolimod		chemical drug		-0.429	0.0184	AXL,BCL2,Ccl2,CCL5,Ccl7,CD36,CDKN1A,COL3A1,FN1,FOSL1,IL6,S1PR3,SPHK1
EIF2AK3	-0.781	kinase		0.761	0.0187	AMY2B,ASNS,CA9,Ccl2,EIF2AK3,EIF4EBP1,FOSL1,GADD45A,IL6,MTHFR,MYC,NFIL3,RPS6KA2,SCN5A,SLC1A4,VEGFA
carbamylcholine		chemical drug		0.6	0.0188	CDKN1A,CHRM3,ECE1,NPR1,PTHLH,RGS2,TGFA,VEGFA
pimagedine		chemical drug		0.718	0.0188	ACTA2,BCL2,CNN1,COL4A1,HBEGF,IL6,LAMB1,VEGFA
calcimycin		chemical reagent		1.068	0.019	ACE,ATP2A2,CYCS,FN1,FOSL1,IL6,INHBA,LCN2,MAP3K8,MTHFR,MYC,NGF,PPARG,PTGS2,RCAN1,THRSP,VEGFA
mir-10		microRNA		0.762	0.0193	ERBB2,FGFR3,GAB2,GJA1,HDC,HOXD10,IGF1R,IGF2,IL6,MAF,MKNK2,PTPN18,SMO,VEGFA
KLF3	-0.284	transcription regulator		0.949	0.0194	ACOT11,ANK1,APRT,ARID5A,BCAP29,BCL2,BOLA1,CAPG,CD1D,CENPT,Cux1,Cyb5r3,DOK3,E430018J23Rik,EMID1,GIMAP8,GNGT2,GRB7,HDAC11,HS3ST1,IL17RA,LY96,MIF,NEURL3,PRKACA,RAP1GAP2,RELN,RPP21,SIDT2,SMAD3,SV2A,TEK,TES,THYN1,TMC7,TMEM108,TMPO,TRIM36,TSPAN17,ZEB2
trastuzumab		biologic drug		-0.221	0.0195	ANGPT2,ERBB2,IL6,MYC,TOP2A
cyclooxygenase		group		1.387	0.0195	IL6,MRC1,PTGS2,Retnla,RGS2
RHOJ	0.47	enzyme			0.0195	AKAP12,ANXA1,ATP2A2,PLAT,PTN
CHEK1	0.842	kinase		0.651	0.0195	BUB1,CDKN1A,MYC,PCNA,RRM2
mir-143		microRNA		0.555	0.0195	BCL2,COL3A1,MMP2,PDGFRA,PTGS2
BRD7	0.055	transcription regulator		1.044	0.0195	CDKN1A,CYP1A1,FASN,RAD51,VCAN
GSK3A	-0.599	kinase		0.391	0.0195	GATA4,GSK3A,IRS1,KDR,PDCD1
isoprenaline		chemical drug		0	0.0195	EPHX2,NGF,NR4A2,PER1,SLC2A4
CEP-1347		chemical drug		-1.133	0.0195	Ccl2,CCL5,IL6,MAPK8IP1,PTGS2
riboflavin		chemical - endogenous mammalian		0.447	0.0195	FZD1,MMP2,PTCH1,SFRP1,TIMP1
AVP		other		0.522	0.0196	ACTA2,ADM,ATP1A1,COL3A1,EDNRB,IL6,NGF,RRM2,S100A6
Ifn gamma		complex	Activated	2.667	0.0199	Ccl2,CCL5,CDKN1A,COL1A1,FLT1,FN1,IGFBP5,IL17RA,IL33,IRF8,Ly6a (includes others),LY96,MYC,PPARG,XAF1
BMS-690514		chemical drug	Inhibited	-2.646	0.02	BRCA1,CCNB1,CDK1,CTSF,CYCS,PCNA,PPARG
HLX	-0.479	transcription regulator		-1.091	0.02	BMP2,CCNB1,CYP1B1,MYC,PLXNA1,THY1,UNC5B
SLC16A2	-0.235	transporter		-0.6	0.02	Cbr2,HAPLN1,HR,MARCKSL1,Nrgn,SCUBE1,THRSP
PF4		cytokine		1.97	0.02	ACTA2,CDKN1A,CNN1,CXCL3,IL6,LY75,SPHK1
taurine		chemical - endogenous mammalian		-1.342	0.02	AXL,Ccl2,FN1,IL6,MMP2,PTGS2,SLC6A6
USF1	-0.016	transcription regulator		-0.537	0.0202	AKAP12,CBS/CBSL,Ces2c,FASN,GPAM,IGFBP3,Mt1,PTGS2,SLC19A1,SPEG,SPP1,SYNPO,UCP2
BMPR2	-0.158	kinase			0.0205	EFNB2,FN1,JAG2,SEMA3C,SNAI1,SPP1
LHX2		transcription regulator		0.557	0.0205	COL1A1,DIO2,NCAM2,NQO1,ROBO1,ROBO2
MTA2	-0.131	transcription regulator			0.0205	ACTC1,CDKN1A,Hbb-b1,LYL1,MYC,SQLE
SPRY1	1.979	other		0	0.0205	ETV1,FGFR3,LOX,MEST,MMP2,MYOCD
BMPR1B	-1.86	kinase			0.0205	CDKN1A,HAPLN1,POSTN,PPARG,PTGS2,SOX5
TAF4B	-0.213	transcription regulator		1.964	0.0205	FN1,FST,INHBA,ITGA6,RET,SPP1
IRAK3	0.584	kinase		-1.016	0.0205	ACTA2,Ccl2,COL1A1,CXCL3,IL6,IRF5
arsenic		chemical toxicant		0.314	0.0205	EGFR,EPHX2,Mt1,NQO1,TGFA,TRAF1
linolenic acid		chemical - endogenous mammalian		0.765	0.0205	CD36,FASN,LEPR,NR1H3,THRSP,UCP2
estriol		chemical - endogenous mammalian		1	0.0207	HOXA10,IRS1,IRS2,SDC3
SYK/ZAP		group		1.96	0.0207	IL6,PTGS2,TIMP1,VEGFC
PLA2G2D		enzyme		-1	0.0207	Ccl2,CD68,IL6,MRC1
Ppp2c		group		0.152	0.0207	BCL2,CDKN1A,EIF4EBP1,PIM1
PTBP1	-0.31	enzyme			0.0207	CD5,FGFR1,MYC,SERPINA3
miR-210-3p (miRNAs w/seed UGUGCGU)		mature microRNA		-1.253	0.0207	EFNA3,FGFRL1,NPTX1,TP53I11
FRS2	-0.591	other			0.0207	ACTA2,ERBB2,ITGA6,Ly6a (includes others)
BMX	-0.652	kinase		0	0.0207	COL3A1,IL6,MMP2,TIMP1
RBP1	-0.073	transporter		-1.154	0.0207	ALDH1A1,POLR2B,PPARG,RBP7
ID4	-0.556	transcription regulator		0.422	0.0207	BRCA1,CDKN1A,MMP2,PPARG
HULC		other		0.152	0.0207	BCL2,CDH5,KDR,SNAI1
bisphenol A diglycidyl ether		chemical reagent	Inhibited	-2	0.0207	ACTA2,EGLN3,PTGS2,RARB
1,2-dimethylhydrazine		chemical toxicant		1	0.0207	BIRC5,GJA1,MYC,PTGS2
1-chloro-2-(2,2,2-trichloro-1-(4-chlorophenyl)ethyl)benzene		chemical toxicant		0.739	0.0207	CDKN1A,CYP7B1,GADD45A,PGR
N,N-dimethylsphingosine		chemical reagent		1.106	0.0207	FN1,IL6,PTGS2,SPHK1
[D-Ala2,N-Me-Phe4,Gly5-ol]-Enkephalin		chemical reagent		1.195	0.0207	CCL5,EGFR,RGS4,THBS2
maxacalcitol		chemical drug		-0.849	0.0207	ALPL,EGFR,NGF,PTHLH
trapidil		chemical drug			0.0209	PDGFRB,PIM1
glycodeoxycholic acid		chemical - endogenous mammalian			0.0209	HPGD,IL6
chloride		chemical - endogenous mammalian			0.0209	PTGS2,SLC26A4
1-palmitoyl-2-arachidonoyl-phosphatidylcholine		chemical - endogenous mammalian			0.0209	CCNB1,IL6
Abl1/2		group			0.0209	NME1,TEK
1,2,5,6-dibenzanthracene		chemical toxicant			0.0209	CYP1A1,CYP1B1
sethoxydim		chemical toxicant			0.0209	BCL2,MYC
gliquidone		chemical drug			0.0209	FABP4,SLC2A4
propentofylline		chemical drug			0.0209	GAP43,NGF
prochloraz		chemical reagent			0.0209	CYP1A1,CYP1B1
imperatorin		chemical - endogenous non-mammalian			0.0209	IL6,PTGS2
APBB2	-0.242	other			0.0209	LRP1,TYMS
PRAG1		kinase			0.0209	HEY1,HEY2
EBF3	2.414	transcription regulator			0.0209	ADCY3,SLC2A4
ELOVL2		enzyme			0.0209	FASN,SCD
THAP11	0.281	transcription regulator			0.0209	GATA4,GATA6
ZNF300		transcription regulator			0.0209	IL6,MYC
2-(3-chlorophenylamino)phenylacetic acid		chemical drug			0.0209	COL4A1,FN1
CTBP1-DT		other			0.0209	CDKN1A,SMAD3
FERMT3	-0.343	enzyme			0.0209	TWIST1,VEGFA
SUCO		other			0.0209	COL1A1,COL1A2
SCARB2	-0.52	transmembrane receptor			0.0209	Ccl2,IL6
corticotropin		biologic drug			0.0209	FURIN,PCSK6
ATP1A2	-1.145	transporter			0.0209	ATP1A1,ATP1A2
AZD7762		chemical drug			0.0209	CCNB1,RAD51
TSIX	1.096	other			0.0209	COL1A1,COL1A2
LPXN		transcription regulator			0.0209	ACTA2,MYH11
NDST1	-1.073	enzyme			0.0209	KDR,Retnla
ELL	0.211	transcription regulator			0.0209	CDKN1A,MYC
TPSG1		peptidase			0.0209	CXCL3,IL6
PLEC	0.472	other			0.0209	IL6,KRT18
PMEPA1	-0.282	other			0.0209	CDKN1A,KLK3
RPP38	0.927	enzyme			0.0209	POP4,RPP21
recombinant interferon gamma		biologic drug			0.0209	FGFR2,PRKACA
17alpha-hydroxyprogesterone caproate		chemical drug			0.0209	PTGS2,VEGFA
GSTA4		enzyme			0.0209	CCNB1,CDK1
CLIP1	-0.462	other			0.0209	IL6,PCNA
riociguat		chemical drug			0.0209	SPP1,TIMP1
miR-136-5p (miRNAs w/seed CUCCAUU)		mature microRNA			0.0209	BCL2,WNT2
miR-2682-5p (and other miRNAs w/seed AGGCAGU)		mature microRNA			0.0209	MYC,VEGFA
miR-376a-5p (miRNAs w/seed UAGAUUC)		mature microRNA			0.0209	SLC16A1,TTK
mir-431		microRNA			0.0209	FN1,VCAN
miR-184 (and other miRNAs w/seed GGACGGA)		mature microRNA			0.0209	NFATC2,SFRP4
PROS1	0.36	other			0.0209	IL6,TWIST1
ASS1	-1.084	enzyme			0.0209	AXL,MYC
CCL20		cytokine			0.0209	Ccl2,POSTN
KLF16		transcription regulator			0.0209	CDKN1A,CYP1A1
REG3G		other			0.0209	IL33,TSLP
SERPINB3		other			0.0209	IL6,LRP1
DOK2	-1.267	other			0.0209	DOK2,MYC
NRP2	3.547	kinase			0.0209	BCL2,S100A4
STK16	0.063	kinase			0.0209	NPPC,VEGFA
PIK3C3	-0.192	kinase			0.0209	IGF2,VPS36
BMP1	-0.799	peptidase			0.0209	IGFBP3,OGN
ZHX2	-0.904	transcription regulator			0.0209	HDC,MYH11
SOD3	-0.616	enzyme			0.0209	CA9,HPSE
CHST15	-0.21	enzyme			0.0209	CCL5,IL6
RGS3	-0.341	other			0.0209	MYC,SNAI1
Yap1		transcription regulator			0.0209	MYH11,MYOCD
IGF2BP3	-0.232	translation regulator			0.0209	ABCG2,IGF2
MAP2		other			0.0209	PRKAR2A,PRKAR2B
TOP2B	-0.449	enzyme			0.0209	FASN,RELN
SPAG9	-0.177	other			0.0209	CDKN1A,FOXK1
ALPL	4.764	phosphatase			0.0209	ALPL,SPP1
AP2A2	-0.371	transporter			0.0209	BCL2,CDKN1A
CDC20	1.047	other			0.0209	CCNB1,UBE2C
ITGB8		other			0.0209	CDKN1A,SMAD3
EPZ004777		chemical reagent			0.0209	HOXA10,Meis1
URMC-099		chemical reagent			0.0209	Ccl2,IL6
EEF1A1	0.035	translation regulator			0.0209	MYC,S100A4
ANP32A		other			0.0209	PTGS2,TK1
TOP2A	0.952	enzyme			0.0209	MYC,TOP2A
Rbpjl2		other			0.0209	HEY1,HEY2
SCT		other			0.0209	AQP1,CD36
BCKDHA	0.188	enzyme			0.0209	MYC,RARB
glycine ethyl ester		chemical reagent			0.0209	EGFR,TGFA
KPNA2	0.872	transporter			0.0209	SNAI1,STK35
WTAP	0.221	other			0.0209	BCL2,BIRC5
temocapril		chemical reagent			0.0209	ACE,PTGS2
AA-861		chemical reagent			0.0209	IGF1R,PTGS2
BB-2116		chemical - protease inhibitor			0.0209	EGFR,HBEGF
gabexate		chemical drug			0.0209	CXCL3,IL6
saccharin		chemical reagent			0.0209	FABP4,PPARG
oxonic acid		chemical drug			0.0209	Ccl2,POR
triphenyltin		chemical toxicant			0.0209	FABP4,IL6
3-nitrobenzanthrone		chemical toxicant			0.0209	CYP1A1,NQO1
etodolac		chemical drug			0.0209	CD36,THBS1
10-decarbamoylmitomycin C		chemical toxicant			0.0209	CDKN1A,GADD45A
potassium cyanide		chemical reagent			0.0209	TIMP1,TIMP2
calcium carbonate		chemical drug			0.0209	PCNA,TGFA
L-JNK inhibitor I		chemical reagent			0.0209	BMP6,SPHK1
phosphoramidon		chemical - endogenous non-mammalian			0.0209	ECE1,EDNRB
atosiban		biologic drug			0.0209	CDKN1A,GJA1
Z-LEHD-FMK		chemical reagent			0.0209	EGFR,SPHK1
tenidap		chemical drug			0.0209	IL6,PTGS2
18-alpha-glycyrrhetinic acid		chemical - endogenous non-mammalian			0.0209	LPL,PPARG
lisofylline		chemical drug			0.0209	COL4A1,LAMB1
alpha-ergocryptine		chemical toxicant			0.0209	PAQR7,PAQR8
noladin ether		chemical - endogenous mammalian			0.0209	Ccl2,IL6
AVI-4126		biologic drug			0.0209	MYC,PCNA
titanium		chemical reagent			0.0209	IL6,VEGFA
epiallopregnanolone		chemical - endogenous mammalian			0.0209	LGALS3,PTGS2
ZFHX3	0.016	transcription regulator			0.0211	CREB3L1,EBF1,IFITM3,LHX6,LRRC17,MIF,NPR1,PLA2G7,PYGM,RASL11B,RGS16,RGS2,SERPINA1,VIPR2
AGER	0.601	transmembrane receptor		0.655	0.0211	BCL2,Ccl2,CDKN1A,COL4A1,CXCL3,FLT1,IL6,LPL,MMP2,PTGS2,TNC,VEGFA
Interferon alpha		group	Activated	3.154	0.0212	A4GALT,AXL,BCL2,BCR,CCL5,CD1D,CDKN1A,CELSR1,CH25H,CSF2RB,CXCL3,DAG1,DYNLT1,EGFR,EMID1,ENPP2,FASN,GNA15,IFI16,IFITM3,IL10RA,IL17RA,IL6,IL7,INSR,IRF5,IRF8,LCK,MMP28,MORC2,MYC,NFIL3,NPM3,PIM1,PLAT,PRKACA,PTGS2,PTHLH,RSAD2,RTP4,SERPINB1,SLC6A4,SLFN12L,Slfn2,SPRY1,TRIL,TTC28,TYMS,UNC93B1,USP18,ZBP1
ANXA1	0.823	enzyme		-0.258	0.0216	ANGPT2,ANXA1,IL6,MMP2,PTGS2,SPHK1,TIFA,TIMP2
NRG2		growth factor			0.0218	BCL2,CXCL6,DAG1,EGFR,ERBB2,IGF2,ITGB5,PRKACA,SGSH,TOB2,VEGFA
BCL2	-0.77	transporter		-1.232	0.022	ATP2A2,BCL2,CD5,CDK1,CDKN1A,GADD45A,GAP43,IGFBP6,IL6,MCAM,MMP2,PLAUR,SPHK1,TIMP1,TIMP2,VEGFA
MAP2K7	-0.317	kinase			0.0222	ANGPT2,CCL5,CDKN1A,EFNB2,ENPP2,FN1,GJA1,MYC,RHOB,TFPI2
C/EBP		group		-0.728	0.0222	ALDH3A1,CYP1A1,DIO2,F8,HSD11B1,IL6,LCN2,PTGS2,Retnla
baicalin		chemical - endogenous non-mammalian		-0.963	0.0222	ACE,BCL2,BIRC5,COL1A1,IGFBP5,IL6,KCNJ13,MIF,VIPR2
POU2F2		transcription regulator		-0.137	0.023	ADA,DACT3,DIXDC1,EBF1,FJX1,GATM,LCK,MYC,PFKFB3,SCD,SPP1,SYDE2,TGFA,TIMP2
methamphetamine		chemical drug		1.176	0.0233	BCL2,BID,Ccl2,IGF1R,IL6,MMP2,MYC,NAT8L,NTRK2,NTS,SLC18A2,TIMP2
SOX17	0.074	transcription regulator		-1	0.0234	CDC42BPB,COL4A1,GATA4,GATA6,KDR,LAMB1,SLC38A4
ZBED6	-0.038	transcription regulator		-0.061	0.0234	COL13A1,CRIM1,DLGAP5,IGF2,PRPF19,TTK,UPP1
mir-126		microRNA		0.705	0.0234	DLK1,IRS1,MYOCD,PIK3R2,PLK2,TWIST1,VEGFA
DNASE2	-0.123	enzyme			0.0234	CH25H,Ly6a (includes others),RSAD2,RTP4,SLAMF8,USP18,ZBP1
ABCG1	-0.582	transporter	Inhibited	-2.557	0.0234	Ccl2,CH25H,CXCL3,CYP7B1,IL10RA,IL13RA1,IL6
histone deacetylase inhibitor		chemical drug		1.706	0.0234	ABL1,BCL2,CDKN1A,ERBB2,IGFBP3,MYC,RECK
honokiol		chemical - endogenous non-mammalian	Inhibited	-2.2	0.0234	CDKN1A,FLT1,KDR,MAP3K8,PPARG,PTGS2,SNAI1
TNFSF10	-0.235	cytokine		1.262	0.0235	ANGPT2,BCL2,BID,BIRC5,EGFR,IFI16,IGF1R,IL6,MMP2,PCNA,PTGS2,RCAN1,TIMP1,TRAF1,VEGFA
MBD2	1.241	transcription regulator		1.937	0.0242	AMY2A,ASS1,BRCA1,CDKN1A,CKS2,DLK1,EFNA5,MGMT,MMP2,NEIL3,PLK1
SGK1	-0.118	kinase		-1.187	0.0242	CDKN1A,FABP4,HBEGF,HOXA10,IL6,KCNQ4,PPARG,SCN5A,SLC2A4,SMO,STIM1
CYP2E1		enzyme		1.387	0.0242	Ccl2,COL1A2,IL6,NCF2,PTGS2
SP100		transcription regulator			0.0242	AXIN1,BRCA1,CDKN1A,SNAI1,THY1
SMARCD3	-0.604	transcription regulator		-1.342	0.0242	ALCAM,COL1A1,FMOD,HAPLN1,SOX5
RACK1		enzyme		0	0.0242	CCL5,CDKN1A,COL1A2,MYC,PTCH1
GABPB1	0.041	transcription regulator		1.131	0.0242	AURKA,BRCA1,OXTR,ROBO4,TNC
NONO	-0.034	transcription regulator		-0.447	0.0242	FASN,PDE10A,PDE2A,PDE3A,PDE3B
HRG		other		1.387	0.0242	Ccl6,CD74,SNAI1,SPP1,TIMP1
fumonisin B1		chemical toxicant		-0.747	0.0242	ABCB1,CD1D,CYP1A1,MBD2,PTGS2
[truncated: 633 more rows]

## Sheet: S1pr1-ECKO.IPA
Results from IPA analysis of genes up- and down-regulated from bulk RNAseq performed on FACS sorted S1pr1-ECKO and WT control MAECs . Data presented in Figure 1D.
Upstream Regulator	Expr Log Ratio	Molecule Type	Predicted Activation State	Activation z-score	Flags	p-value of overlap	Target molecules in dataset	Mechanistic Network
lipopolysaccharide		chemical drug	Activated	6.077		3.49e-23	ACTC1,ADORA2A,AK4,APLNR,Apol11b (includes others),ATP1A2,BCL3,C3,Ccl2,CCL21,CCL5,Ccl7,CD274,CD74,CFB,CH25H,CSPG4,CX3CL1,CXCL10,Cxcl15,CXCL3,Cxcl9,CYP1A1,EGR4,ENPP2,FSCN1,FST,GBP5,GBP6,GMFG,HDC,HK2,HLA-A,HLA-DMA,HLA-DQA1,HLA-DQB1,HLA-DRB5,HMGA1,Ifi202b,IFI44,IGFBP5,IL2RG,IL33,IL4I1,IL7,IRF5,IRF8,IRGM,ISG15,ITIH4,KCNK5,KDR,KIT,LBP,MARCKSL1,Mx2,NFIX,NFKBIA,NFKBID,NFKBIE,NID2,NLRC5,NOD2,NOS2,NPPC,NPT…	138 (14)
IFNG		cytokine	Activated	6.161		2.06e-21	ADORA2A,B2M,BCAN,BCL3,BST1,C3,C4A/C4B,Ccl2,CCL5,Ccl7,CD2,CD274,CD74,CFB,CH25H,CX3CL1,CXCL10,CXCL3,Cxcl9,DUOXA2,EDNRB,EGLN3,EMID1,FHL2,FLRT2,GBP5,GBP6,GLDN,GNG2,GNG7,GRIA1,HK2,HLA-A,HLA-DMA,HLA-DQA1,HLA-DQB1,HLA-DRB5,HMGA1,Ifi202b,IFI44,IL18BP,IL4I1,IL7,IRF5,IRF8,IRGM,ISG15,ITGA6,KDR,MARCKSL1,Ms4a4b (includes others),Mx2,NEURL3,NFKBIA,NLRC5,NOD2,NOS2,PPP1R1B,PRKCQ,PTGS2,PTN,PTX3,RSAD2,SELE,Serpina…	114 (15)
TNF		cytokine	Activated	5.139		3.73e-21	Acp5,ADAMTS4,ADORA2A,ANK3,B2M,BCL3,C3,Ccl2,CCL5,Ccl7,CD274,CDH3,CFB,CH25H,CX3CL1,CXCL10,Cxcl15,CXCL3,Cxcl9,CYP1A1,DUSP14,EDNRB,EGLN3,ENPP2,ESR1,F2RL3,FSCN1,FST,GBP6,GRIA1,GSTM2,HAPLN1,HDC,HK2,HLA-A,IGFBP5,IGFBP6,IL18BP,IL33,IL4I1,IL7,IRF5,IRF8,ISG15,ITGA6,KDR,KIT,KLK3,LBP,LDLR,LTBP2,LYVE1,MARCKSL1,MEOX1,NFKBIA,NFKBIE,NOD2,NOS2,NR4A1,NUAK2,PCSK6,PDE7B,PDPN,PLA2G4C,PTGS2,PTX3,RASD1,RGS16,RGS2,RGS7,…	139 (13)
STAT3	0.193	transcription regulator		0.729		1.29e-19	BCL3,Ccl2,CCL5,CD274,CD74,CFB,CX3CL1,CXCL10,CXCL3,Cxcl9,ENPP2,ESR1,FLRT3,FSCN1,FST,GBP5,GBP6,H2-Q8,HK2,HLA-A,HLA-DMA,HLA-DQA1,HLA-DRB5,Ifi202b,IFI44,IGFBP5,IL7,IRF5,ISG15,KDR,KLK3,LBP,Mx2,NEURL3,NOS2,NRP2,PTGS2,PTN,RSAD2,S1PR1,Serpina3g (includes others),TAP1,TFPI2,UBD	124 (17)
poly rI:rC-RNA		biologic drug	Activated	5.488	bias	1.6e-18	Apol11b (includes others),B2M,C3,Ccl2,CCL5,CD274,CD74,CFB,CX3CL1,CXCL10,Cxcl15,CXCL3,Cxcl9,GBP6,HLA-A,IFI44,IGFBP6,IL2RG,IL33,IL4I1,IRF5,ISG15,Mx2,NFKBIA,NLRC5,NOS2,NR4A1,PLA2G4C,PRKCQ,PTGS2,RGS2,RSAD2,SELE,SERPING1,STON2,TAP1,TFPI2,TNFAIP3,VCAM1,ZBP1	117 (19)
TMEM173	0.309	other	Activated	3.843	bias	2.63e-18	CCL5,CXCL10,Cxcl9,GAS7,GBP5,HDC,Ifi27l2a/Ifi27l2b,IFI44,IL33,ISG15,NOS2,PLEKHA4,RGS16,RSAD2,Serpina3g (includes others),UPP1	105 (18)
STAT1	0.654	transcription regulator	Activated	4.668	bias	2.63e-18	B2M,C3,C4A/C4B,Ccl2,CCL5,CD274,CFB,CH25H,CX3CL1,CXCL10,CXCL3,Cxcl9,EGLN3,GBP5,GBP6,HLA-DQA1,HLA-DRB5,IFI44,IL18BP,IRF5,IRF8,ISG15,Mx2,NEURL3,NLRC5,NOS2,PTGS2,PTN,RSAD2,Serpina3g (includes others),SERPING1,TAP1,UBD,ZBP1	126 (16)
Ifnar		group	Activated	3.997	bias	2.94e-18	B2M,C3,Ccl2,CCL5,Ccl7,CD274,CD74,CXCL10,Cxcl9,H2-Q8,HLA-A,IRF8,ISG15,Mx2,NLRC5,RSAD2,SPP1,TAP1,VCAM1,ZBP1	123 (16)
IL1B		cytokine	Activated	4.509		3.05e-17	ADAMTS4,B2M,BCL3,C3,Ccl2,CCL5,Ccl7,CD274,CD74,Cdkn1c,CFB,CX3CL1,CXCL10,CXCL3,Cxcl9,CYP1A1,EGLN3,ENPP2,ESR1,F13A1,FST,GBP6,GRIA1,HK2,HLA-A,HMGA1,IGFBP5,IGFBP6,IL33,IL4I1,IL7,ISG15,KDR,LBP,LDLR,MARCKSL1,NFKBIA,NOS2,NR4A1,PCSK6,PLB1,PTGS2,PTX3,RGS16,RSAD2,SELE,SEMA3A,SPP1,TFPI2,TNFAIP3,UBD,VCAM1	141 (14)
dexamethasone		chemical drug	Inhibited	-3.372		3.02e-16	Acp5,ACTC1,ACTG2,B2M,BCL3,C3,Ccl2,CCL21,CCL5,Ccl7,CD274,CD74,Cdkn1c,CFB,CX3CL1,CXCL10,CXCL3,Cxcl9,CYP1A1,DACH1,EDNRB,EGLN3,EPHB1,FLRT2,FOXQ1,FST,GBP5,HAPLN1,HHIP,HLA-A,HLA-DMA,HLA-DQB1,HLA-DRB5,HMGA1,Ifi202b,Ifi27l2a/Ifi27l2b,IFI44,IGFBP5,IGFBP6,IL33,IL7,IRF5,IRF8,ISG15,KDR,KIT,LBP,LDLR,LTBP2,LYVE1,NFKBIA,NFKBIE,NOS2,NPPC,NR4A1,NTS,PCSK6,PLB1,PRKCQ,PTGS2,PTN,PTX3,RASD1,RGS2,RSAD2,S1PR1,SELE,SERPI…	150 (16)
TGFB1	0.263	growth factor		0.851		1.53e-15	Acp5,ACTC1,ACTG2,ADAM19,ADAMTS4,ANXA8/ANXA8L1,APLNR,B2M,BCL3,C3,Ccl2,CCL5,Ccl7,Cdkn1c,Ces2c,CFB,CSPG4,CX3CL1,CXCL10,CXCL3,DACH1,DSP,EDNRB,F13A1,FAP,FSCN1,GAS7,GLDN,GNG2,GNG7,GRIA1,HK2,HLA-DMA,HLA-DQA1,HLA-DQB1,HLA-DRB5,HMGA1,HTR2B,IGFBP5,IGFBP6,IL33,ITGA6,ITGA7,ITIH5,KDR,KIT,KLK3,LDLR,LTBP2,LYVE1,NCAPG,NFKBIA,NOS2,NR4A1,PDPN,PLXNC1,PPP1R1B,PTGS2,PTX3,RASGRP3,RSAD2,S1PR1,SELE,SEMA3A,SLC16A9,SOX4,S…	148 (15)
MYD88	0.077	other	Activated	4.495	bias	1.68e-15	BCL3,C3,Ccl2,CCL5,CD274,CH25H,CXCL10,Cxcl15,CXCL3,Cxcl9,EDNRB,HDC,HLA-A,IGFBP5,IL7,IRF8,ISG15,Ms4a4b (includes others),NFKBIA,NOD2,NOS2,PTGS2,RSAD2,SELE,SPP1,TNFAIP3,VCAM1	132 (15)
NFKBIA	0.675	transcription regulator	Activated	2.739		6.38e-15	BCL3,BOK,C3,Ccl2,CCL5,Ccl7,CDH3,Cdkn1c,CH25H,CX3CL1,CXCL10,CXCL3,ENPP2,FHL2,FSCN1,HK2,HLA-A,HMGA1,IGFBP6,IL33,ISG15,NDRG2,NFKBIA,NFKBIE,NOD2,NOS2,NR4A1,PTGS2,PTX3,RGS16,SELE,TNFAIP3,VCAM1	106 (14)
IRF3	-0.109	transcription regulator	Activated	4.129	bias	1.32e-14	B2M,Ccl2,CCL5,CD274,CX3CL1,CXCL10,Cxcl9,FST,GBP5,Ifi27l2a/Ifi27l2b,IFI44,IRF5,IRGM,ISG15,Ms4a4b (includes others),Mx2,NLRC5,NOS2,PLAC8,RSAD2,TAP1,TNFAIP3,ZBP1	93 (14)
IFNB1		cytokine	Activated	2.078		1.4e-14	Acp5,Apol11b (includes others),Ccl2,CCL5,CD274,CH25H,CX3CL1,CXCL10,CXCL3,CYP1A1,GBP5,GBP6,HLA-A,Ifi27l2a/Ifi27l2b,IRGM,ISG15,NFIX,NFKBIE,NID2,NOD2,NOS2,NPTX1,PTGS2,RNASEL,RSAD2,SPP1,ZBP1	99 (17)
TICAM1	-0.132	other	Activated	4.377	bias	1.75e-14	Apol11b (includes others),BCL3,Ccl2,CCL5,CFB,CH25H,CXCL10,CXCL3,EDNRB,IL18BP,IRGM,ISG15,Ms4a4b (includes others),Mx2,NFKBIA,PTGS2,RSAD2,SELE,TNFAIP3,VCAM1	91 (12)
TLR4	-0.056	transmembrane receptor	Activated	4.283	bias	3.06e-14	C3,Ccl2,CCL5,Ccl7,CD274,CFB,CXCL10,Cxcl15,CXCL3,Cxcl9,HDC,HLA-DQA1,IL18BP,IRF8,IRGM,ISG15,Mx2,NFKBIA,NFKBID,NOD2,NOS2,NR4A1,PTGS2,PTX3,RGS16,RSAD2,SELE,SPP1,TNFAIP3,VCAM1	133 (12)
CHUK	0.228	kinase	Activated	3.745	bias	4.21e-14	Acp5,C3,Ccl2,CCL21,CCL5,CH25H,CX3CL1,CXCL10,CXCL3,ENAH,ENPP2,HK2,HLA-A,IGFBP6,ISG15,NFKBIA,PTGS2,PTX3,RGS16,SELE,SPP1,TNFAIP3,VCAM1	122 (14)
APP	0.107	other	Activated	3.866		6.49e-14	ADAMTS4,ATP1A2,C3,C4A/C4B,Ccl2,CCL5,Ccl7,CD74,CDH3,CH25H,CXCL10,Cxcl15,CXCL3,Cxcl9,CYFIP2,EFHC2,ENPP2,ESR1,F2RL3,FAP,GBP6,GLIS3,GNG2,GRIA1,HMGA1,IGFBP5,IL4I1,IL7,IRF5,IRGM,ITGA6,KLK3,LBP,LDLR,MASTL,Mx2,NOS2,NPTX1,NRP2,PTGS2,RELN,RNASEL,RSAD2,S1PR1,TUBB3,VCAM1	128 (19)
IL10RA		transmembrane receptor	Inhibited	-4.795		6.5e-14	C3,CBS/CBSL,CCL5,CFB,Cxcl9,CYFIP2,EDNRB,F13A1,GBP5,GBP6,GSTM2,H2-Q8,HLA-A,IL18BP,IL2RG,IRGM,KLK3,NDRG2,NLRC5,NOS2,RSAD2,S1PR1,Serpina3g (includes others),SLC2A6,TAP1,UPP1,ZBP1	83 (10)
salmonella minnesota R595 lipopolysaccharides		chemical - endogenous non-mammalian	Activated	4.169	bias	1.08e-13	BCL3,Ccl2,CCL5,Ccl7,CH25H,CXCL10,CXCL3,EDNRB,HLA-DMA,HLA-DQA1,IRF8,ISG15,Ms4a4b (includes others),NFKBIA,PTGS2,RSAD2,TNFAIP3,VCAM1	113 (17)
RELA	0.104	transcription regulator	Activated	3.514	bias	1.36e-13	B2M,BCL3,C3,CBS/CBSL,Ccl2,CCL5,CD274,CFB,CX3CL1,CXCL10,CXCL3,CYP1A1,FSCN1,ISG15,KIT,NFKBIA,NFKBID,NFKBIE,NOD2,NOS2,NR4A1,PTGS2,PTX3,SELE,Serpina3g (includes others),TAP1,TFPI2,TNFAIP3,TUBB3,UBD,VCAM1	141 (13)
NFkB (complex)		complex	Activated	5.325	bias	3.37e-13	BCL3,C3,Ccl2,CCL5,Ccl7,CD274,CD74,CFB,CX3CL1,CXCL10,CXCL3,Cxcl9,EDNRB,FST,HLA-A,ISG15,KDR,KIT,MEOX1,NFKBIA,NFKBID,NFKBIE,NOS2,NUAK2,PTGS2,PTX3,RGS16,RSAD2,SELE,SFRP2,SLC2A6,SPP1,TAP1,TFPI2,TNFAIP3,UBD,VCAM1	118 (13)
IL1A		cytokine	Activated	3.519	bias	3.48e-13	Acp5,ADAMTS4,ADORA2A,BCL3,Ccl2,CCL5,CD274,CXCL10,CXCL3,CYP1A1,F2RL3,HDC,IGFBP5,KIT,NFKBIA,NOS2,NR2F2,PTGS2,PTX3,SELE,SPP1,TNFAIP3,VCAM1	120 (17)
CG		complex	Activated	3.508	bias	3.56e-13	APLNR,B2M,Ccl2,Ccl7,CXCL10,CXCL3,ENPP2,EPHA7,FST,GBP6,GDF10,HAPLN1,HK2,HLA-A,HLA-DQA1,HMGA1,IL33,LDLR,NOS2,NR4A1,PARD6G,PTGS2,PTX3,RGS2,SPP1,STC1,TFPI2,UPP1	142 (23)
TLR3	0.273	transmembrane receptor	Activated	4.586	bias	3.83e-13	ADAMTS4,Apol11b (includes others),ARRDC4,C3,Ccl2,CCL5,Ccl7,CD274,CFB,CX3CL1,CXCL10,CXCL3,Cxcl9,Ifi202b,IFI44,IL33,ISG15,NOS2,NR4A1,NTS,PTGS2,PTX3,RSAD2,SELE	116 (16)
beta-estradiol		chemical - endogenous mammalian		0.712		6.31e-13	ACTC1,ADAMTS4,ADORA2A,ANK1,C3,C4A/C4B,Ccl2,CCL21,CCL5,CD274,CD74,CDCA7,CFB,CXCL10,CXCL3,CYP1A1,DSP,ENPP2,ESR1,FAM84A,FHL2,FMOD,FST,GRIA1,HLA-A,HLA-DQA1,HLA-DRB5,Ifi202b,IGFBP5,IGFBP6,IL7,ISG15,ITIH4,KDR,KIT,KLK3,LDLR,MMRN1,Mx2,MYO1B,NDRG2,NFKBIA,NOS2,NPTX1,NR4A1,NRP2,NTS,PLEKHA4,PPP1R1B,PSD,PTGS2,PTX3,RASD1,RGS16,RGS2,RGS7,S1PR1,SELE,SEMA3A,SFRP2,SOX4,SPN,STC1,TCF15,TFPI2,TNFAIP3,TP53I11,VAV3,VCA…	137 (18)
Ige		complex	Activated	3.953	bias	1.81e-12	BCL3,C3,Ccl2,CCL5,Ccl7,CD74,CX3CL1,CXCL3,FHL2,H2-Q8,HDC,HLA-DMA,IL33,LRMP,MARCKSL1,NFKBIA,NFKBID,NFKBIE,PTGS2,PTX3,RGS16,RSAD2,SLC6A19,SPP1,SRGAP3,VCAM1	135 (17)
E. coli serotype 0127B8 lipopolysaccharide		chemical - endogenous non-mammalian	Activated	3.494		2.37e-12	BCAN,Ccl2,CCL5,Ccl7,CXCL10,Cxcl9,EDNRB,GLDN,GNG2,GNG7,IL7,IRF5,NFKBIA,NOS2,PPP1R1B,PTGS2,PTX3,RSAD2,SLC16A9,UBD	110 (13)
tetradecanoylphorbol acetate		chemical drug	Activated	3.654		3.02e-12	ADAMTS4,ADORA2A,BCL3,C3,CBS/CBSL,Ccl2,CCL5,Ccl7,CH25H,CXCL10,CXCL3,CYP1A1,EGR4,ESR1,FST,HAPLN1,HDC,HMGA1,IGFBP5,IGFBP6,IL2RG,IL4I1,IRF8,ISG15,KIT,KLK3,LDLR,LYVE1,MYOZ2,NFKBIA,NFKBIE,NOS2,NR4A1,NTS,PDPN,Pln,PODXL2,PRKCQ,PTGS2,RGS16,RGS2,S1PR1,SELE,SFRP2,SPN,SPP1,STC1,TFPI2,TNFAIP3,VCAM1	155 (17)
SB203580		chemical - kinase inhibitor	Inhibited	-3.195	bias	3.75e-12	Acp5,ADAMTS4,C3,C4A/C4B,Ccl2,CCL5,Ccl7,CD274,COBL,CX3CL1,CXCL10,CXCL3,CYP1A1,EDNRB,F2RL3,FOXQ1,HAPLN1,ISG15,KDR,NOS2,NR4A1,PLB1,PTGS2,RGS7,SELE,SERPING1,SPP1,UBD,UCP2,VCAM1	121 (14)
IFNAR1	0.3	transmembrane receptor	Activated	3.223	bias	4.17e-12	Apol11b (includes others),B2M,CCL5,CD274,CH25H,CXCL10,CXCL3,Cxcl9,HLA-A,IFI44,ISG15,Ms4a4b (includes others),NOS2,PTGS2,RSAD2,TNFAIP3,UBD,VCAM1	104 (18)
PTGER4	0.004	G-protein coupled receptor	Inhibited	-2.488		5.25e-12	ADAMTS4,Ccl2,Ccl7,CH25H,CXCL10,Cxcl9,GBP6,GLIS3,IL4I1,IRGM,MASTL,Mx2,NOS2,PTGS2,RNASEL,RSAD2,S1PR1,SPP1	125 (18)
Map3k7	0.207	kinase	Activated	3.456	bias	9.08e-12	Ccl2,CCL5,Ccl7,CXCL10,CXCL3,Cxcl9,ISG15,Mx2,NFKBIA,NOD2,PTGS2,RSAD2,VCAM1	116 (12)
Ifn		group	Activated	3.796	bias	1.65e-11	B2M,CH25H,CXCL10,HLA-A,Ifi202b,IL33,IL7,IRF8,ISG15,Mx2,NOS2,RNASEL,RSAD2,SPP1,TAP1,ZBP1	91 (16)
E. coli B4 lipopolysaccharide		chemical toxicant	Activated	3.073	bias	1.8e-11	Ccl2,CCL5,CD274,CXCL10,CXCL3,ESR1,F13A1,FIBIN,HK2,HLA-A,IL33,Klrb1f,NFKBIA,NOS2,PPP1R1B,PTGS2,RSAD2,SELE,SLAMF9,TAP1,TNFAIP3,VCAM1,ZBP1	118 (20)
JAK1/2		group	Activated	3.051	bias	1.98e-11	Ccl2,CD74,FAM81A,GBP5,HLA-DQA1,HLA-DRB5,ISG15,Mx2,NOS2,NPTX1,PLAC8,PSD,RSAD2	80 (10)
IKBKB	0.084	kinase	Activated	3.727	bias	2.08e-11	Acp5,C3,Ccl2,CCL5,CH25H,CX3CL1,CXCL10,CXCL3,Cxcl9,ENPP2,FSCN1,HK2,HLA-A,IGFBP6,ISG15,NFKBIA,NOS2,PTGS2,PTX3,RGS16,SELE,TNFAIP3,VCAM1	130 (15)
IL27		cytokine	Activated	3.364		3.77e-11	B2M,CCL5,CD274,CD74,CX3CL1,CXCL10,Cxcl9,HLA-A,HLA-DMA,HLA-DQA1,HLA-DQB1,IL18BP,NOS2,PTGS2,TAP1,UBD,VCAM1	116 (17)
IL4		cytokine		-0.059		3.78e-11	Acp5,ADAM19,APOLD1,BCL3,C3,Ccl2,CCL5,Ccl7,CD2,CD274,CD74,CX3CL1,CXCL10,CXCL3,Cxcl9,F13A1,FLRT2,FSCN1,GBP5,GBP6,HK2,HLA-DMA,IFI44,IL33,IL4I1,IRF5,IRF8,ISG15,KIT,KLK3,Ms4a4b (includes others),NFKBIA,NOS2,PLA2G4C,PTGS2,RASGRP3,SELE,Serpina3g (includes others),SPP1,TP53I11,TRPV2,VCAM1,ZBP1	120 (15)
STAT6	0.151	transcription regulator		-1.35		5.67e-11	Acp5,ADAM19,APOLD1,BCL3,Ccl2,CCL5,CD2,CXCL10,CXCL3,FLRT2,FSCN1,GBP5,GBP6,HLA-DMA,IFI44,IL33,IL4I1,ISG15,Ms4a4b (includes others),NFKBIA,PTGS2,RASGRP3,SELE,TRPV2,VCAM1,ZBP1	123 (17)
NFKB1	0.131	transcription regulator	Activated	2.691	bias	6.83e-11	B2M,BCL3,Ccl2,CCL5,CFB,CX3CL1,CXCL10,CXCL3,Cxcl9,DTX1,ENPP2,FSCN1,ISG15,NFKBIA,NOD2,NOS2,NR4A1,PTGS2,PTX3,SELE,TNFAIP3,VCAM1	136 (12)
hyaluronic acid		chemical - endogenous mammalian	Activated	2.418		7.7e-11	BCL3,Ccl2,CCL5,CXCL10,CXCL3,Cxcl9,FST,IRF5,NFKBIA,NOS2,NR4A1,PTGS2,SPP1,TNFAIP3,VCAM1	105 (16)
TP53	0.091	transcription regulator		1.474		9.81e-11	AK4,ANK1,ANXA8/ANXA8L1,BCL3,BOK,Ccl2,CCL5,CDH3,CX3CL1,CXCL10,CXCL3,CYFIP2,CYP1A1,DTX1,EDA2R,ENPP2,ESR1,FHL2,FLRT2,GPR160,HDC,HIC1,HK2,HLA-DQA1,HMGA1,IGFBP5,IL4I1,IL7,IRF5,IRF8,ISG15,KDR,KIT,KLK3,LDLR,LRRC17,NCAPG,NDRG2,NFKBIA,NID2,NOS2,NPTX1,PARD6G,PFKFB4,Pln,PTGS2,PTN,RGS16,SELE,Serpina3g (includes others),SERPING1,SFRP2,SLC2A6,SPN,SPP1,SRGAP3,TAP1,TFPI2,TP53I11,TUBB3,UBD,UPP1,WNT2	126 (20)
BSCL2	0.006	other				1.07e-10	Ccl2,Ccl7,CD74,CYFIP2,GRIA1,HMGA1,IGFBP5,IL33,MARK1,NOS2,PTGS2,RSAD2
IFN alpha/beta		group	Activated	2.422	bias	1.12e-10	CCL5,CX3CL1,CXCL10,Cxcl9,GAS7,H2-Q8,HLA-A,Ifi27l2a/Ifi27l2b,IL7,IRF8,Mx2,NOS2,RSAD2	108 (15)
IKBKG	0.125	kinase	Activated	3.002	bias	1.24e-10	C3,Ccl2,CCL5,CH25H,CX3CL1,CXCL10,CXCL3,ENPP2,HK2,HLA-A,IGFBP6,ISG15,NFKBIA,PTX3,RGS16,TNFAIP3	129 (14)
IL6	-0.289	cytokine	Activated	3.101		1.3e-10	Acp5,ADAMTS4,BCL3,C3,Ccl2,CCL5,CD274,CD74,CXCL10,CXCL3,Cxcl9,CYP1A1,EGLN3,ENPP2,FSCN1,H2-Q8,HLA-A,HLA-DMA,HLA-DQA1,HLA-DRB5,Ifi202b,IGFBP5,IGFBP6,IL7,KDR,KIT,KLK3,LBP,LDLR,MRVI1,NFKBIA,NOS2,PGF,PTGS2,SPP1,TAP1,VCAM1	145 (15)
E. coli B5 lipopolysaccharide		chemical - endogenous non-mammalian	Activated	3.768		1.68e-10	B2M,BCL3,Ccl2,CCL5,Ccl7,CD274,CIDEA,CX3CL1,CXCL10,Cxcl15,CXCL3,HLA-A,IL7,LDLR,NFKBIA,NOD2,NOS2,PTGS2,SELE,SPP1,TNFAIP3	119 (12)
RPSA	-0.149	translation regulator	Inhibited	-2.345	bias	2.23e-10	CCL5,Ccl7,CXCL3,Ifi202b,ISG15,ITGA6,NOS2,PTGS2,TAP1	120 (20)
RIPK2	0.202	kinase	Activated	2.945	bias	2.66e-10	Ccl2,CCL5,CXCL10,CXCL3,IL33,LDLR,MARCKSL1,NOS2,RASGRP3,SELE,SLC2A6,VCAM1	114 (22)
F2		peptidase	Activated	4.332	bias	2.75e-10	BCL3,Ccl2,CX3CL1,CXCL10,CXCL3,EDNRB,F2RL3,HMGA1,IGFBP5,KDR,MEOX1,NFKBIA,NOS2,NUAK2,PTGS2,SELE,SLC2A6,TFPI2,TNFAIP3,TUBB3,VCAM1	96 (15)
IRF7	0.651	transcription regulator	Activated	4.02	bias	3.74e-10	Ccl2,CCL5,CXCL10,GBP5,IFI44,IL33,IL4I1,IRF5,IRF8,IRGM,ISG15,Ms4a4b (includes others),Mx2,PLAC8,RSAD2,TAP1,ZBP1	104 (19)
lactosylceramide		chemical - endogenous mammalian	Activated	2.2	bias	3.96e-10	Ccl2,CCL5,Ccl7,CXCL10,Cxcl9,HLA-DQA1,NOS2,VCAM1	121 (17)
TRAF3IP2	0.003	other	Activated	2.899	bias	4.43e-10	Ccl2,CCL21,CCL5,Ccl7,CDH3,CX3CL1,CXCL10,CXCL3,IL33,ISG15,NOS2,VCAM1	124 (16)
IRF1	0.546	transcription regulator	Activated	3.203	bias	4.49e-10	B2M,CCL5,CD274,CFB,CXCL10,CXCL3,Cxcl9,IL18BP,IL7,IRF5,ISG15,NOS2,PTGS2,RSAD2,TAP1,UBD,VCAM1	113 (14)
SIRT1	0.123	transcription regulator	Inhibited	-3.446		7.22e-10	Ccl2,CCL5,CD74,CYP1A1,ESR1,GBP6,H2-Q8,HLA-A,HLA-DQA1,HLA-DQB1,HLA-DRB5,IFI44,IL2RG,IRGM,LDLR,LTBP2,NFKBIE,NLRC5,PTN,RGS16,RSAD2,SFRP2,TAP1,UCP2	140 (17)
cycloheximide		chemical reagent		0.112		9.44e-10	ACTC1,B2M,CXCL10,CXCL3,Cxcl9,CYP1A1,ESR1,FST,GAS7,IGFBP5,IGFBP6,KLK3,NFKBIA,NFKBIE,NOS2,NR4A1,PTGS2,PTX3,RGS2,RSAD2,SELE,SPP1,TNFAIP3,VCAM1	144 (19)
SOCS1	0.501	other	Inhibited	-3.098	bias	9.66e-10	Ccl2,CXCL10,Cxcl9,GBP5,GBP6,Ifi202b,IFI44,IRGM,ISG15,Mx2,NOS2,PTGS2,RSAD2,SELE,VCAM1	110 (15)
PRKD1	0.152	kinase	Activated	3.103	bias	1.13e-09	Ccl2,CCL5,CD2,CXCL10,CXCL3,Cxcl9,NR4A1,PTGS2,TNFAIP3,VCAM1	122 (18)
Interferon alpha		group	Activated	4.468	bias	1.22e-09	ADAM19,B2M,BCL3,C3,CCL5,CH25H,CXCL10,CXCL3,Cxcl9,EMID1,ENPP2,GBP6,HLA-A,IFI44,IL7,IRF5,IRF8,ISG15,NFKBIA,NOS2,PTGS2,RNASEL,RSAD2,TAP1,VCAM1,ZBP1	111 (15)
mifepristone		chemical drug		-1.961		1.31e-09	C3,Ccl2,CD74,Cdkn1c,EDNRB,FST,HDC,HLA-DQB1,KIT,KLK3,LDLR,NFKBIA,NR4A1,PTGS2,PTN,PTX3,RELN,RGS2,SERPING1,SFRP2,SPP1	169 (25)
Immunoglobulin		complex		1.392		1.5e-09	ADAM19,BCL3,CBS/CBSL,Ccl2,CCL5,CD274,CD74,CXCL10,CXCL3,Cxcl9,DSP,FAP,GAS7,HK2,HLA-DQB1,IL33,IRF5,KDR,NFKBIA,NOS2,NR4A1,PTGS2,RGS16,RGS2,RSAD2,SPP1,UBD,VCAM1	122 (17)
FZD9	-0.034	G-protein coupled receptor	Activated	2.619	bias	1.83e-09	Ccl2,CCL5,CXCL10,Ifi202b,Ifi27l2a/Ifi27l2b,IFI44,ISG15
CTNNB1	0.087	transcription regulator		1.448	bias	3.01e-09	ACTC1,Ccl7,Cdkn1c,Cxcl15,Cxcl9,CYFIP2,CYP1A1,DTX1,ENPP2,F13A1,FOXQ1,FST,HAPLN1,HHIP,IGFBP5,IL7,IRF8,ITGA6,KDR,KIT,KLK3,MEOX1,NDRG2,NOS2,NPTX1,NR4A1,NRP2,PCSK6,PTGS2,SCN5A,SOX4,SPP1,VCAM1,WIF1,WNT2	165 (21)
CCN1		other		1.92	bias	3.13e-09	BOK,C3,Ccl2,Ccl7,CXCL10,CXCL3,ESR1,KDR,NOS2,NR4A1,PTGS2,WIF1	131 (21)
Tnf (family)		group	Activated	2.906		3.46e-09	Ccl2,CCL5,CXCL10,CXCL3,CYP1A1,ENPP2,FST,IL33,KDR,NFKBIA,NOS2,PTGS2,SELE,TNFAIP3,VCAM1	110 (14)
IgG		complex		-0.368		3.6e-09	B2M,C3,Ccl2,CCL5,CXCL10,DSP,DUSP14,EGLN3,FST,HTR2B,ISG15,LDLR,PDPN,PTGS2,S1PR1,TNFAIP3,VCAM1	134 (17)
TREM1		transmembrane receptor		1.457		3.6e-09	ARRDC4,Ccl2,CCL5,CD274,CFB,CXCL10,CXCL3,DUSP14,HECW2,ISG15,NFKBIA,NOD2,PLAC8,PTGS2,RGS16,SPP1,TFPI2	133 (18)
cardiotoxin		chemical - other	Activated	3.464	bias	4.17e-09	B2M,Ccl2,CCL5,Ccl7,Cdkn1c,Cxcl9,EDNRB,IL2RG,ITGA6,MEST,NOS2,PTN,SFRP2,SPP1,UCP2
NFATC2	0.259	transcription regulator	Activated	2.171		4.2e-09	Ccl2,CCL5,CD274,CX3CL1,CXCL10,CXCL3,Cxcl9,ENPP2,IRGM,ISG15,Mx2,NFKBIA,NR4A1,PTGS2,RGS2,RSAD2,SELE	116 (13)
IL21		cytokine	Activated	3.345	bias	4.99e-09	CCL5,CD2,CXCL10,Cxcl9,GBP5,GBP6,HLA-DRB5,IL4I1,IRF5,ISG15,Mx2,NEURL3,NOS2,RSAD2,Serpina3g (includes others),TAP1	112 (17)
S100A8		other		0.65		5.41e-09	ADAMTS4,BCL3,Ccl2,Ccl7,CD274,CDH3,Cdkn1c,CXCL10,CXCL3,Cxcl9,ENPP2,IL33,ISG15,NFKBIA,NOS2,VCAM1	148 (16)
epigallocatechin-gallate		chemical drug	Inhibited	-2.012		5.43e-09	ADORA2A,CCL5,Ccl7,CXCL10,CXCL3,ESR1,Ifi202b,ISG15,KDR,KLK3,LDLR,NFKBIA,NOS2,PRG2,PTGS2,PTN,TAP1,VCAM1	141 (21)
KLF2	0.444	transcription regulator		-1.731		7.46e-09	APLNR,BCL3,Ccl2,CCL5,Ccl7,Cxcl15,IL2RG,KDR,LBP,NFKBIA,PDPN,PGF,PTGS2,S1PR1,TFPI2,VCAM1	109 (17)
MAPK1	0.079	kinase		0.376		7.87e-09	ATP1A2,CCL5,CFB,EGLN3,EGR4,ESR1,FHL2,GBP5,GNG2,HDC,HLA-DMA,IFI44,ISG15,NOS2,NR4A1,PTGS2,RGS16,RGS2,Serpina3g (includes others),SFRP2,SPP1,TAP1	123 (18)
CEBPB	0.258	transcription regulator	Activated	2.785	bias	7.95e-09	APLNR,C3,Ccl2,CCL5,CDH3,CXCL3,CYP1A1,EPHA7,FHL2,HDC,HIST1H4A,HLA-A,HMGA1,IL18BP,IL7,LBP,LDLR,NFKBID,NOS2,PRG2,PTGS2,SPP1,TUBB3,UPP1	125 (16)
AGT		growth factor	Activated	2.657		8.09e-09	ANK3,BOK,Ccl2,CCL5,CXCL10,Cxcl15,CXCL3,EDNRB,IGFBP5,ITGA7,LDLR,NOS2,NR4A1,PGF,PTGS2,RGS2,SELE,SOX4,SPP1,SRGAP3,STC1,TBX2,TUBB3,UCP2,VCAM1	116 (21)
APOE	-0.11	transporter		-1.367		8.35e-09	ANK3,Ccl2,CCL5,CXCL3,ESR1,GAS7,GRIA1,IGFBP6,LDLR,LTBP2,MYO1B,NOS2,PRKCQ,PTGS2,PTX3,RELN,SELE,SPP1,UCP2,VCAM1,WNT2	116 (19)
VCAN	-0.52	other		-1.74		8.47e-09	ANXA8/ANXA8L1,C3,C4A/C4B,Ccl2,CIDEA,ENPP2,FST,GLIS3,IFI44,IRF8,LBP,NFKBIA,RGS2,SERPING1,VCAM1	73 (7)
forskolin		chemical toxicant	Activated	2.132		9.54e-09	ACTG2,ADORA2A,BCL3,CCL5,CXCL3,CYFIP2,DUSP14,EGLN3,ESR1,FST,GRIA1,HAPLN1,HHIP,HK2,HLA-DQA1,HLA-DQB1,Ifi202b,IGFBP5,IGFBP6,KLK3,NFKBIA,NOS2,NR4A1,PTGS2,RGS2,SPP1,STC1,TFPI2,TNFAIP3,TP53I11,UCP2,UPP1	131 (19)
IL17A		cytokine	Activated	4.003	bias	9.92e-09	C3,Ccl2,CCL5,Ccl7,CD274,CX3CL1,CXCL10,CXCL3,Cxcl9,IL33,ISG15,NOS2,PGF,PTGS2,RGS16,SELE,TNFAIP3,VCAM1	125 (15)
PARP1	0.038	enzyme	Activated	3.406		1.06e-08	Ccl2,CCL5,CD274,CXCL10,CXCL3,Cxcl9,GBP6,IL18BP,IRGM,KLK3,NOS2,PTGS2,VCAM1	137 (18)
AHR	0.514	ligand-dependent nuclear receptor		0.886		1.07e-08	ADAM19,CCL21,CCL5,Ces2c,CXCL10,CYP1A1,EGLN3,ENPEP,ESR1,HK2,ITGA6,ITGA7,KIT,LBP,LTBP2,NID2,NOS2,NPTX1,PTGS2,SEMA3A,SPP1,TNFAIP8L1	130 (19)
PTH		other	Activated	2.138	bias	1.09e-08	Acp5,ANK3,Ccl2,IGFBP5,IL33,NDRG2,NR4A1,PPP1R1B,PTGS2,RGS2,SFRP2,SPP1,STC1,TFPI2,WIF1	107 (20)
CREBBP	-0.057	transcription regulator	Activated	2.771	bias	1.1e-08	ADORA2A,B2M,CCL5,CXCL10,Cxcl9,DTX1,GNG2,ISG15,ITGA6,KLK3,LDLR,NFKBIA,NOS2,NR4A1,PTGS2,RGS2,RNASEL,RSAD2,SELE,SH3GL3,SLC6A19,TNFAIP3,VCAM1	131 (20)
IL1R1	0.277	transmembrane receptor		1.026	bias	1.12e-08	Ccl2,CCL5,Ccl7,CXCL10,CXCL3,Cxcl9,LBP,NOS2,PTGS2,SELE	110 (19)
Tlr		group	Activated	3.286	bias	1.18e-08	Ccl2,CCL5,CXCL10,CXCL3,HLA-A,Ifi202b,IL33,NFKBIA,NOS2,PTGS2,RGS16,SEMA3A,TNFAIP3	121 (17)
TBK1	0.138	kinase		1.418		1.43e-08	CCL5,CXCL10,CXCL3,Cxcl9,HDC,Ifi202b,IFI44,ISG15,Mx2,PTGS2,RSAD2,SELE	110 (16)
TLR7		transmembrane receptor	Activated	3.786	bias	1.43e-08	ACTC1,Ccl2,CCL5,Ccl7,CD274,CXCL10,CXCL3,GNG2,IFI44,IL4I1,ISG15,NFKBIA,PTCHD1,PTX3,RSAD2,SELE,TNFAIP3	99 (12)
MAP3K7		kinase		1.376		1.47e-08	Ccl2,CCL5,Ccl7,CFB,CH25H,CXCL10,IFI44,PTGS2,RGS2,RNASEL,SELE	114 (18)
tretinoin		chemical - endogenous mammalian	Activated	2.68		1.52e-08	Acp5,ANXA8/ANXA8L1,APBA2,APLNR,BCL3,C3,CBS/CBSL,Ccl2,CD274,CD74,CDCA7,CIDEA,CXCL10,CYP1A1,DSP,ENPP2,FST,GAS7,GRIA1,HLA-A,HMGA1,IFI44,IGFBP5,IGFBP6,IL4I1,ISG15,ITGA6,KDR,KIT,KLK3,LBP,MARCKSL1,MEOX1,NID2,NOS2,NR2F2,PAPPA2,PPP1R1B,PRG2,PTGS2,PTX3,SERPING1,SOX4,SPP1,STC1,TAP1,TBX2,TNFAIP3,TUBB3,UCP2,VCAM1,XK	138 (18)
Alpha catenin		group	Inhibited	-3.44	bias	1.6e-08	ADAMTS4,BCL3,C1QTNF3,CXCL10,IGFBP6,IL2RG,KLK3,NFKBIA,PTGS2,PTX3,SELE,TNFAIP3,VCAM1	84 (8)
fingolimod		chemical drug		-1.962	bias	1.68e-08	Ccl2,CCL5,Ccl7,CD274,Cdkn1c,CXCL10,Cxcl9,HLA-DQA1,HLA-DQB1,NOS2,S1PR1	127 (20)
Vegf		group	Activated	4.338	bias	1.73e-08	ADORA2A,APLNR,Ccl2,CXCL10,ENPP2,FST,HDC,HK2,ITGA6,KDR,LDLR,LYVE1,NID2,NR2F2,NR4A1,PDE7B,PGF,PPP1R1B,PTGS2,RGS2,SELE,SH3TC2,STC1,STIL,VAV3,VCAM1	136 (22)
S100A9		other	Activated	2.045		1.94e-08	ADAMTS4,BCL3,C3,Ccl2,Ccl7,CD274,CDH3,Cdkn1c,CXCL10,CXCL3,ENPP2,IL33,ISG15,NOS2,VCAM1	109 (17)
lysophosphatidylinositol		chemical - endogenous mammalian	Activated	3	bias	2.09e-08	C3,CD274,CD74,CFB,CX3CL1,CXCL3,IL33,SELE,STC1
NfkB-RelA		complex	Activated	2.615	bias	2.14e-08	CCL5,CXCL3,NFKBIA,NOS2,PTGS2,SELE,VCAM1
IKBKE	0.127	kinase		1.292	bias	2.15e-08	Ccl2,CCL5,CXCL10,Cxcl9,HLA-A,IL7,NFKBIA,NOS2,PTGS2,RSAD2	98 (14)
filgrastim		biologic drug	Inhibited	-3.379		2.22e-08	B2M,CCL5,CD74,CXCL10,DACH1,EPHB1,GBP5,HHIP,HLA-DQB1,HLA-DRB5,HMGA1,IFI44,ISG15,KIT,LDLR,NFKBIE,NR4A1,PLB1,PTGS2,RSAD2,S1PR1,SERPING1,SLC45A3,SPP1
OSM		cytokine	Activated	3.201		2.36e-08	ADAMTS4,B2M,BCL3,BST1,Ccl2,CCL5,CDH3,CH25H,CXCL10,CXCL3,GAS7,HK2,HLA-A,IGFBP6,IL33,IL7,ITGA6,ITGA7,LBP,LDLR,NOS2,PDPN,PGF,SELE,SERPING1,SPP1,TAP1,VCAM1	134 (19)
F2R	0.02	G-protein coupled receptor	Activated	2.735	bias	2.53e-08	Ccl2,CXCL3,DSP,ESR1,ITGA6,KDR,NR4A1,PTGS2,SELE,TFPI2,TNFAIP3,VCAM1	135 (25)
fluticasone propionate		chemical drug	Inhibited	-2.42		2.66e-08	C3,CCL5,CD74,CFB,CXCL10,FSCN1,GBP5,GLDN,HLA-DMA,HLA-DQA1,IL18BP,IRF8,PLAC8,SPP1,TAP1	90 (7)
U0126		chemical - kinase inhibitor	Inhibited	-2.966	bias	2.78e-08	ADAMTS4,APLNR,C3,Ccl2,CCL5,CD274,CXCL10,CXCL3,CYP1A1,EDNRB,ENPP2,ESR1,GRIA1,HAPLN1,HLA-DQA1,ITGA6,KDR,KLK3,LDLR,NOS2,NR4A1,PTGS2,SPP1,STC1,TFPI2,VCAM1	144 (17)
tosyllysine chloromethyl ketone		chemical - protease inhibitor		-0.739		2.97e-08	CYP1A1,NFKBIA,NOS2,PTGS2,SPN	70 (8)
LY294002		chemical - kinase inhibitor	Inhibited	-3.962	bias	3.64e-08	Ccl2,CCL5,CD274,CD74,CXCL10,CXCL3,Cxcl9,ESR1,FLRT2,HAPLN1,IGFBP5,NFKBIA,NOS2,NPTX1,NR4A1,NTS,PTGS2,PTN,RGS2,S1PR1,SPN,SPP1,TCF15,TFPI2,TNFAIP3,VCAM1	138 (21)
SP600125		chemical - kinase inhibitor	Inhibited	-3.164		4.32e-08	ADAMTS4,Ccl2,CCL5,CSPG4,CXCL10,CXCL3,CYP1A1,FLRT3,FOXQ1,ISG15,ITGA6,LDLR,NOS2,NR4A1,PTGS2,PTX3,SELE,SPP1,VCAM1	110 (20)
pyrrolidine dithiocarbamate		chemical reagent	Inhibited	-2.344	bias	4.33e-08	Ccl2,CCL5,CX3CL1,CXCL10,CXCL3,Cxcl9,NFKBIA,NOS2,NR4A1,PTGS2,SELE,VCAM1	97 (18)
PI3K (complex)		complex	Activated	2.121	bias	4.56e-08	Ccl2,CD2,CD274,CXCL10,HK2,IL33,ITGA6,KDR,LTBP2,NFKBIA,NOS2,PLB1,PPP1R1B,PTGS2,RGS2,SPP1,TNFAIP3,TUBB3,VCAM1	111 (19)
DCN	0.589	other		1.744		5.2e-08	CXCL10,FST,HLA-DQA1,HLA-DQB1,KIT,NOS2,S1PR1,SEMA3A,VCAM1	122 (14)
TLR9		transmembrane receptor	Activated	3.973	bias	5.25e-08	ADAMTS4,ARRDC4,Ccl2,CCL5,Ccl7,CD274,CXCL10,CXCL3,Ifi202b,IL33,IL4I1,ISG15,NOS2,NR4A1,NTS,PTGS2,RSAD2	107 (17)
rosiglitazone		chemical drug		-0.981		5.78e-08	ABCC9,C3,C4A/C4B,Ccl2,CCL5,Ccl7,Cdkn1c,CIDEA,CXCL10,Cxcl9,CYP1A1,EGLN3,GRIA1,HTR2B,IGFBP5,IGFBP6,KLK3,NOS2,PTGS2,RGS2,Serpina3g (includes others),SPN,UCP2	117 (19)
lysophosphatidylcholine		chemical - other	Activated	2.759	bias	6e-08	Ccl2,CCL5,CD274,CD74,HLA-DMA,LDLR,NOD2,NOS2,RGS2,SELE	119 (22)
ESR2		ligand-dependent nuclear receptor		-0.534		6.03e-08	ACTC1,ANK1,ARRDC4,C3,CBS/CBSL,ENPP2,ESR1,FAM84A,FOXQ1,KDR,KLK3,NDRG2,NID2,NOS2,PTGS2,PTX3,RELN,SELE,SOX4,SPP1,ST8SIA6,TP53I11,VAV3	161 (23)
pristane		chemical toxicant	Activated	2.63	bias	6.17e-08	Ccl2,CCL21,CCL5,CXCL10,IRF5,IRF8,ISG15,PTGS2	104 (14)
sphingosine-1-phosphate		chemical - endogenous mammalian		0.224		6.61e-08	Ccl2,CCL5,CXCL10,ENPP2,KDR,NOS2,NRP2,PTGS2,S1PR1,SELE,VCAM1	94 (17)
CD40LG		cytokine	Activated	2.173	bias	6.67e-08	B2M,CCL5,CXCL10,EGR4,FSCN1,HK2,HLA-DQA1,HLA-DQB1,IFI44,ISG15,MARCKSL1,NFKBIA,NFKBIE,NOS2,PLA2G4C,PTGS2,RGS2,SELE,TAP1,TNFAIP3,UBD,VCAM1	111 (13)
IL10		cytokine		-0.444		7.16e-08	BCL3,Ccl2,CCL5,Ccl7,CD2,CD274,CXCL10,CXCL3,Cxcl9,FLRT2,IL33,IL7,NFKBID,NOD2,NOS2,PTGS2,PTX3,RGS16,SELE,TAP1,VCAM1	123 (14)
progesterone		chemical - endogenous mammalian	Activated	2.036		7.44e-08	ATP1A2,C3,Cdkn1c,CFB,CXCL10,CYP1A1,ENPEP,ENPP2,ESR1,FST,GRIA1,HDC,HLA-DQB1,IGFBP5,KDR,KLK3,NDRG2,NFKBIA,NOS2,NR4A1,PDPN,PPP1R1B,PTGS2,PTX3,RELN,SPP1,TBX2,URB2	146 (20)
ERK1/2		group		1.252	bias	9.02e-08	B2M,C3,Ccl2,CCL5,CXCL10,Cxcl15,CXCL3,ESR1,HK2,HLA-A,HMGA1,LDLR,NOS2,PFKFB4,PTGS2,PTN,SPP1,TAP1,VCAM1	128 (19)
RNASEH2A	0.033	enzyme				9.36e-08	CXCL10,Ifi27l2a/Ifi27l2b,IFI44,IRF5,ISG15,NFKBIA,PTGS2,RSAD2
TRADD	0.092	other	Activated	2.646	bias	9.74e-08	CX3CL1,CXCL3,KLK3,NFKBIA,TNFAIP3,UBD,VCAM1	105 (15)
CD14	-0.116	transmembrane receptor	Activated	2.764	bias	1.17e-07	Ccl2,CCL5,CXCL10,Cxcl15,NOS2,PTGS2,SELE,TNFAIP3,VCAM1	113 (18)
IL1		group	Activated	3.904	bias	1.2e-07	ADAMTS4,C3,Ccl2,CCL5,CFB,CXCL10,CXCL3,CYP1A1,F2RL3,FST,IL33,IL7,KIT,LDLR,NOS2,NRP2,PTGS2,SELE,TNFAIP3,VCAM1	108 (15)
TREM2		transmembrane receptor		-1.664		1.23e-07	Ccl2,IRF8,NFKBIA,NOS2,PTGS2,TNFAIP3	126 (16)
prostaglandin E2		chemical - endogenous mammalian		1.82		1.28e-07	Ccl2,CCL5,CD274,CXCL10,CXCL3,FMOD,FST,HDC,IGFBP5,IL2RG,IL4I1,NFKBIA,NOS2,NR4A1,PGF,PTGS2,RGS2,SPP1,UCP2	105 (17)
TAB1	-0.295	enzyme		-1.912		1.64e-07	CCL5,CFB,CH25H,CXCL10,PTGS2,RGS2,SELE	85 (15)
IFNLR1		transmembrane receptor				1.67e-07	CCL5,CXCL10,CXCL3,IFI44,ISG15,PTGS2,RSAD2,TNFAIP3	81 (11)
DYSF	0.646	other				1.69e-07	B2M,Ccl7,CD74,CXCL10,H2-Q8,HLA-A,HLA-DQA1,HLA-DQB1,HLA-DRB5,Ifi202b
TRIM24	-0.044	transcription regulator	Inhibited	-3	bias	1.77e-07	CXCL10,FLRT3,Ifi27l2a/Ifi27l2b,IFI44,IRGM,ISG15,Ms4a4b (includes others),PLAC8,PRKCQ,SPP1,TAP1
cuprizone		chemical toxicant		0.963		1.78e-07	Ccl2,CCL5,Ccl7,CSPG4,CXCL10,S1PR1
SNCA		enzyme		1.923		1.87e-07	Ccl2,CD74,FAM81A,GBP5,HLA-DQA1,HLA-DRB5,ISG15,MARK1,Mx2,NOS2,NPTX1,PLAC8,PLXNC1,PSD,RSAD2,TUBB3	118 (14)
PRDM1		transcription regulator		-1.515		1.98e-07	2210407C18Rik,Ccl2,CD74,CXCL3,ESR1,FAM167A,HLA-DQA1,Ifi202b,IRF8,KHDRBS3,NOS2,PCSK6,PLAC8,PROX1,RELN,RSAD2	134 (22)
PPP2CA	-0.026	phosphatase	Activated	2.449		2.01e-07	Ccl2,CFB,CXCL10,CXCL3,Cxcl9,NOS2,PTGS2,UPP1	93 (17)
Irgm1	0.499	other	Inhibited	-2.752	bias	2.01e-07	Ccl2,CCL5,CXCL10,Cxcl9,Ifi27l2a/Ifi27l2b,NCAPG,RSAD2,STIL	101 (13)
USF1	0.096	transcription regulator		1.912	bias	2.15e-07	B2M,CBS/CBSL,CD2,Ces2c,LDLR,PTGS2,SPP1,TBX2,TNFAIP3,UCP2
phospholipid		chemical - endogenous mammalian	Activated	2.233		2.37e-07	Ccl2,CCL5,CXCL10,CXCL3,PTGS2	100 (21)
TNFSF11		cytokine	Activated	2.427	bias	2.48e-07	Acp5,BST1,Ccl2,CCL5,Ccl7,CXCL3,CYP1A1,ESR1,FHL2,IRF8,MARCKSL1,NFKBIA,NOS2,PTGS2,RGS16,SPP1,VCAM1	136 (20)
HMOX1	0.514	enzyme		-1.945		2.63e-07	ADORA2A,Ccl2,CD274,CXCL10,CXCL3,CYP1A1,KDR,NOS2,PTGS2,RELN,SELE,VCAM1	113 (18)
IRF2	0.201	transcription regulator		-0.028		2.63e-07	B2M,CFB,CXCL10,HK2,IL7,IRF8,ISG15,LBP,NOS2,PTGS2,TAP1,VCAM1	103 (18)
TP73		transcription regulator		0.538		2.77e-07	ADAM19,B2M,C3,Ccl2,Cdkn1c,CX3CL1,CXCL10,CXCL3,FST,HIC1,IGFBP5,IL7,IRF5,KIT,MYOZ2,PDPN,RELN,SERPING1,SPP1,TAP1,TP53I11	128 (18)
Go 6976		chemical - kinase inhibitor	Inhibited	-2.958	bias	2.82e-07	Ccl2,CCL5,CXCL10,CXCL3,NFKBIA,NOS2,PTGS2,STC1,VCAM1	94 (17)
LTBR	0.124	transmembrane receptor	Activated	2	bias	2.86e-07	BST1,Ccl2,CCL21,ENPP2,NFKBIA,NOS2,PDPN,VCAM1	103 (12)
IL12 (complex)		complex		1.902	bias	3.02e-07	BCL3,Ccl2,CCL5,CXCL10,Cxcl9,Ifi202b,IL18BP,IRF8,ISG15,ITGA6,KIT,Ms4a4b (includes others),NOS2,PLAC8,PTGS2	123 (17)
IL1RN		cytokine	Inhibited	-2.328	bias	3.12e-07	CXCL3,GRIA1,HLA-DQB1,IFI44,IGFBP5,IL18BP,NOS2,PTGS2,RSAD2,SELE,SPP1,UBD	130 (19)
genistein		chemical drug		-1		3.14e-07	BCL3,C3,Ccl2,CCL5,CD74,CX3CL1,CXCL10,CXCL3,CYP1A1,ESR1,HLA-A,HLA-DQA1,KLK3,LBP,LDLR,MMRN1,NOS2,PFKFB4,PTGS2,SPP1,VCAM1	130 (21)
IL33	1.011	cytokine	Activated	3.437	bias	3.15e-07	BCL3,Ccl2,CCL5,Ccl7,CX3CL1,CXCL10,CXCL3,HDC,IL2RG,IRF5,NFKBIA,NFKBID,NFKBIE,NOS2,PRG2,TNFAIP3	114 (14)
HTT	0.043	transcription regulator		1.055		3.56e-07	ADAMTS4,ADORA2A,B2M,BCL3,C1QTNF3,CCL5,CD74,CX3CL1,CYFIP2,EDNRB,ENPP2,GAS7,GNG7,GRIA1,HMGA1,IGFBP5,LDLR,LTBP2,NGEF,NOS2,NPTX1,NR4A1,NTS,PPP1R1B,RGS16,Serpina3g (includes others),SERPING1,SPP1,VCAM1	145 (21)
Pam3-Cys-Ser-Lys4		chemical reagent		1.53	bias	3.62e-07	Ccl2,CCL5,CD274,CX3CL1,CXCL10,CXCL3,Cxcl9,HLA-A,HLA-DRB5,NFKBIA,NOS2,PTGS2,RGS2	97 (15)
IL2		cytokine	Activated	3.173	bias	3.62e-07	ADAM19,C3,Ccl2,CCL5,CD2,CD274,CD74,CXCL10,CXCL3,Cxcl9,CYP1A1,ENPP2,HK2,IL18BP,IL2RG,ITGA6,KIT,LDLR,LRMP,NOS2,PLAC8,PTGS2,RGS16,RGS2,Serpina3g (includes others),SPP1,UPP1	120 (19)
15-deoxy-delta-12,14 -PGJ 2		chemical - endogenous mammalian	Inhibited	-2.753		3.67e-07	ADAMTS4,Ccl2,CCL5,CXCL10,Cxcl15,ESR1,KDR,KLK3,NFKBIA,NOS2,PTGS2,SELE,SPP1,VCAM1	124 (20)
Hsp70		group		0.26		4e-07	Ccl2,CXCL3,KLK3,NFKBIA,NOD2,NOS2,SELE,VCAM1	125 (20)
SCARB1	0.024	transporter		-1.394		4e-07	CCL5,CX3CL1,LDLR,NOS2,PTGS2,SELE,SPP1,VCAM1	106 (14)
methotrexate		chemical drug		-0.163		4.41e-07	ADORA2A,AK4,C3,CCL21,CCL5,CFB,CXCL10,DUSP14,IGFBP5,ITIH4,LBP,NOS2,PTGS2,SERPING1,SPP1,VCAM1	133 (19)
FAS	-0.19	transmembrane receptor		0.659		4.53e-07	Ccl2,CCL5,CXCL10,CXCL3,Cxcl9,FSCN1,GNG7,HLA-DQB1,ITGA7,LDLR,NFKBIA,NFKBIE,NOS2,NR4A1,NUAK2,PTX3,RSAD2,SPP1,TNFAIP3,VCAM1	114 (12)
MAP3K14	0.441	kinase	Activated	2.912	bias	4.8e-07	BST1,Ccl2,CCL5,NFKBIA,NFKBIE,NOS2,PTGS2,TNFAIP3,VCAM1	121 (13)
diethylstilbestrol		chemical drug		0.973		4.83e-07	C3,CCL21,CFB,ESR1,FMOD,GDF10,HDC,HIC1,HLA-A,IGFBP6,ITIH4,KDR,KLK3,LTBP2,Ms4a4b (includes others),NDRG2,PARD6G,SH3GL3	90 (7)
troglitazone		chemical drug		-0.687		5.14e-07	C3,Ccl2,CCL5,CXCL10,CXCL3,CYP1A1,EGLN3,ITGA6,KLK3,NFKBIA,NOS2,NR2F2,NR4A1,PTGS2,RASD1,SELE,SPP1,STIL,UCP2,VCAM1	94 (18)
NCOA2	-0.05	transcription regulator	Activated	2.159		5.14e-07	Ccl2,CCL5,CXCL10,Cxcl9,CYP1A1,FST,ISG15,KLK3,LDLR,NFKBIA,PTGS2	152 (19)
ADORA2A	1.328	G-protein coupled receptor		-1.854		5.53e-07	ATP1A2,Ccl2,CXCL10,GNG7,HHIP,NFKBIA,NOS2,NR4A1,PPP1R1B,PTGS2,SELE,TUBB3	134 (20)
SRF	0.058	transcription regulator		-1.044		5.94e-07	ACTC1,ACTG2,APOLD1,ASB5,CCL5,EGR4,FHL2,FOXQ1,FST,ITGA6,KDR,LDLR,LMOD1,MYO1B,MYOM1,NR4A1,PRG2,PTGS2,SEMA3A	56 (6)
HRAS		enzyme		0.447		6.27e-07	ANXA8/ANXA8L1,B2M,BOK,Ccl2,CCL5,CDH3,CFB,CXCL10,CYP1A1,FAM167A,FLRT2,GDF10,HDC,Ifi202b,IGFBP5,ITGA6,LRMP,LRRC17,NFKBIA,NID2,NOS2,PGF,PTGS2,Serpina3g (includes others),SOX4,SPP1,TAP1	125 (17)
carrageenan		chemical drug		1.978	bias	6.44e-07	Ccl2,CCL5,CXCL3,ESR1,KIT,NFKBIA,NOS2,PTGS2	99 (18)
TIFA	0.283	other		1.274	bias	6.44e-07	CCL5,CXCL10,CXCL3,NFKBIA,TNFAIP3	117 (15)
camptothecin		chemical drug	Activated	2.714		6.47e-07	AK4,CIDEA,CXCL3,FSCN1,GNG7,HLA-A,HLA-DQA1,HLA-DQB1,ITGA7,LDLR,MARCKSL1,NFKBIA,NFKBIE,NOS2,NR4A1,PLAC8,PTGS2,PTX3,RSAD2,SELE,SPP1,TAP1,TNFAIP3,TP53I11,VAV3,VCAM1	121 (16)
GDF2		growth factor		1.206	bias	6.51e-07	Cdkn1c,ENPP2,FMOD,LYVE1,NFKBIA,PROX1,SELE,SPP1,TUBB3,VCAM1	51 (5)
DDX58	0.283	enzyme	Activated	2.739	bias	6.99e-07	Ccl2,CCL5,CXCL10,IFI44,IRF8,ISG15,PTGS2,RSAD2,SPP1	91 (17)
NRAS	0.062	enzyme	Inhibited	-2.201		7e-07	ANXA8/ANXA8L1,B2M,CCL5,CX3CL1,ENPEP,HLA-A,Ifi202b,ISG15,KDR,LBP,MEST,PTGS2,PTX3,TAP1	126 (20)
Akt		group		1.523		7.63e-07	Ccl2,CD274,CIDEA,CXCL10,ESR1,HK2,NFKBIA,NOS2,NRP2,PPP1R1B,PTGS2,PTN,PTX3,RASD1,SOX4,SPP1,VCAM1	133 (19)
STAT4	0.419	transcription regulator	Activated	3.111	bias	8.23e-07	BCL3,C3,CXCL10,CXCL3,Cxcl9,FSCN1,HLA-DQB1,Ifi202b,ISG15,ITGA7,ITIH5,Ms4a4b (includes others),PLAC8,RGS16,SELE	116 (13)
chelerythrine		chemical drug		-1.633	bias	8.31e-07	Ccl2,CXCL3,NFKBIA,NOS2,SELE,VCAM1	105 (18)
poly dA-dT		chemical reagent	Activated	2.4	bias	8.31e-07	CCL5,CXCL10,ISG15,NFKBIA,RSAD2,ZBP1	109 (18)
ESR1	1.01	ligand-dependent nuclear receptor		-0.436		8.53e-07	ACTC1,ANK3,C3,COBL,CXCL3,CYFIP2,CYP1A1,DCDC2,DTNA,ENAH,ENPP2,ESR1,FAM102A,FST,GAS7,Ifi202b,IFI44,IGFBP5,IRF5,ITGA6,KLK3,LBP,LDLR,MARK1,NCAPG,NFKBIA,NFKBIE,NOS2,PLA2G4C,PTGS2,PTX3,RGS16,RSAD2,SELE,SLC39A4,SOX4,SPP1,TNFAIP3,TNFAIP8L1,TP53I11,VAV3,XK	145 (20)
oleic acid		chemical - endogenous mammalian		0.073		8.74e-07	Ccl2,CX3CL1,HK2,LDLR,NFKBIA,NOS2,NR4A1,PTGS2,SELE,UCP2,VCAM1	97 (20)
IFN Beta		group	Activated	2.394	bias	8.8e-07	CCL5,CD274,CD74,CXCL10,ENPEP,HLA-A,IFI44,ISG15,Mx2,NOS2,RSAD2,ZBP1	82 (14)
NR1H2	-0.055	ligand-dependent nuclear receptor		-1.394		8.82e-07	C3,Ccl2,CCL5,Ccl7,CIDEA,CXCL10,LDLR,NFKBIA,NOS2,PTGS2	123 (21)
trinitrobenzenesulfonic acid		chemical reagent	Activated	3.091	bias	8.82e-07	BST1,Ccl2,CCL5,Ccl7,CXCL10,CXCL3,Cxcl9,NOS2,PTGS2,PTX3	132 (13)
SERPINE2	-0.74	other	Inhibited	-2.621	bias	9.2e-07	Ccl2,CCL21,CCL5,CXCL10,CXCL3,Cxcl9,SELE	116 (16)
dextran sulfate		chemical drug		1.556		9.27e-07	C3,C4A/C4B,Ccl2,CCL5,CD74,CXCL10,CXCL3,Cxcl9,ISG15,NOS2,PGF,PTGS2,PTN,S1PR1,UBD,VCAM1	93 (15)
ZBTB16	-0.33	transcription regulator		-0.541		9.49e-07	Ccl2,Ccl7,CD2,CD274,CD74,CXCL10,DTX1,F13A1,KIT,PTGS2,SPP1,TNFAIP8L1	100 (8)
PPIF	0.063	enzyme		1.265		9.73e-07	Ccl2,CCL5,Ccl7,CX3CL1,CXCL10,CXCL3,Cxcl9,Ifi202b,IRF5,PTN	76 (7)
LCN2	0.755	transporter	Activated	2.888		1e-06	Ccl2,CCL5,Ccl7,CXCL10,CXCL3,Cxcl9,ESR1,LDLR,NOS2	135 (21)
NOD2	0.598	other	Activated	2.785	bias	1e-06	CCL5,CXCL10,CXCL3,MARCKSL1,NFKBIA,NOS2,RASGRP3,SLC2A6,TNFAIP3	85 (13)
MOG		other		1.814	bias	1e-06	Ccl2,CCL5,Ccl7,CD274,CXCL10,Cxcl9,NOS2,VCAM1	106 (16)
H89		chemical - kinase inhibitor		-1.223	bias	1.1e-06	ADORA2A,Ccl2,CCL5,HAPLN1,IGFBP5,NFKBIA,NOS2,NR4A1,NTS,PTGS2,UCP2,VCAM1	94 (20)
IL13		cytokine		1.835		1.1e-06	Acp5,ADORA2A,BCL3,C3,Ccl2,CCL5,Ccl7,CIDEA,CX3CL1,CXCL10,CXCL3,ENPP2,F13A1,GAS7,HDC,NOS2,PLXNC1,PTGS2,SPP1,VCAM1	133 (18)
IRAK4	0.196	kinase				1.12e-06	Ccl2,CXCL10,CXCL3,IRF5,NFKBIA,NOS2,NR4A1,RGS16,TNFAIP3	128 (14)
wortmannin		chemical - kinase inhibitor		0.082		1.21e-06	Ccl2,CCL5,CIDEA,CX3CL1,CXCL10,ESR1,HAPLN1,IRF8,NFKBIA,NOS2,NR4A1,PTGS2,SELE,VCAM1	106 (19)
IFI16	0.889	transcription regulator		1.601	bias	1.26e-06	CCL5,CXCL10,CYP1A1,ESR1,ISG15,LDLR,NFKBIA,SELE,VCAM1	119 (17)
MAP2K6	0.331	kinase		1.141	bias	1.26e-06	Ccl2,CXCL10,ESR1,ISG15,LDLR,NOS2,Pln,PTGS2,RGS7	134 (22)
TLR2	0.486	transmembrane receptor		1.528	bias	1.26e-06	Ccl2,CCL5,CXCL10,Cxcl15,CXCL3,Cxcl9,HLA-DQA1,HLA-DRB5,IL33,NOS2,PTGS2,PTX3,SELE	102 (18)
Ifn gamma		complex		1.754		1.3e-06	Ccl2,CCL5,CXCL10,Cxcl9,ESR1,IGFBP5,IL18BP,IL33,IRF8,NOS2	140 (21)
CIITA	0.985	transcription regulator	Activated	2.632		1.33e-06	B2M,CD74,HLA-A,HLA-DMA,HLA-DQA1,HLA-DQB1,HLA-DRB5
MAPKAPK2	0.156	kinase	Activated	2.209		1.33e-06	Ccl2,Ccl7,CXCL10,CXCL3,HDC,NFKBIA,NOS2,VCAM1	ERBB2
NfkB1-RelA		complex	Activated	2.38	bias	1.39e-06	ADAMTS4,CCL5,NOS2,PTGS2,SELE,VCAM1
IRAK3	-0.015	kinase		1.501		1.39e-06	Ccl2,CXCL3,IRF5,NFKBIA,NOS2,TNFAIP3	113 (16)
GNAQ	0.107	enzyme				1.44e-06	AK4,Ccl2,CSPG4,CX3CL1,CXCL3,FST,HK2,NDRG2,NR4A1,PTGS2,RELN	87 (18)
IGF1	0.308	growth factor		1.699		1.53e-06	C4A/C4B,Ccl2,CCL5,Ccl7,CYFIP2,ESR1,HAPLN1,HDC,HMGA1,IGFBP5,IGFBP6,NFKBIA,NOS2,NR4A1,PPP1R1B,PTGS2,SELE,SPP1,TAP1,TBX2,TUBB3,VCAM1	111 (20)
kainic acid		chemical toxicant	Activated	2.642	bias	1.58e-06	APOLD1,Ccl2,CCL5,GRIA1,HDC,KDR,NFKBID,NR4A1,PTGS2,RELN,SLC39A4,SPP1	101 (20)
PPARG	0.699	ligand-dependent nuclear receptor		-1.313		1.64e-06	C3,Ccl2,CCL5,CD274,Cdkn1c,CIDEA,CXCL3,EGLN3,FST,HK2,IGFBP5,IGFBP6,IL33,LDLR,NOS2,NR2F2,NR4A1,PTGS2,SELE,SPP1,UCP2,VCAM1	102 (16)
NR3C1	0.069	ligand-dependent nuclear receptor		-1.578		1.66e-06	B2M,BOK,C4A/C4B,Ccl2,CCL5,CIDEA,CXCL10,CXCL3,Cxcl9,GRIA1,IL33,IRF8,ISG15,KLK3,MEST,NFKBIA,NOD2,NOS2,PDPN,PTGS2,RASD1,RGS2,SELE,SOX4,SPP1,TNFAIP3,VCAM1	125 (21)
REL	0.535	transcription regulator	Activated	2.449	bias	1.66e-06	B2M,BCL3,CXCL10,Cxcl9,ESR1,HLA-A,IRF5,IRF8,KDR,NFKBIA,NFKBID,NOS2,NR4A1,RSAD2,TNFAIP3	83 (8)
resiquimod		chemical drug	Activated	2.613	bias	1.73e-06	Ccl2,CCL5,Ccl7,CXCL10,CXCL3,Cxcl9,GNG2,IL33,NFKBIA,NOS2,PTGS2,PTX3,SPP1	97 (16)
emodin		chemical drug		-1.248	bias	1.74e-06	Ccl2,CXCL10,CXCL3,CYP1A1,IRF5,NOS2,SELE,VCAM1	108 (20)
dihydrotestosterone		chemical - endogenous mammalian		0.357		1.76e-06	Acp5,B2M,C4A/C4B,CD74,CDCA7,CX3CL1,ESR1,FOXQ1,FST,HK2,HLA-A,Ifi202b,IGFBP5,KLK3,LDLR,MARK1,NFKBIA,NID2,NOS2,NR4A1,PTGS2,SPP1,VCAM1,WIF1	140 (19)
SLC9A3		ion channel				1.76e-06	B2M,CCL5,CD74,IRF8,NOS2,UPP1	96 (7)
HDAC4	0.281	transcription regulator		-0.479		1.83e-06	CYFIP2,DGKB,FST,MYBPC2,NOS2,NR4A1,Pln,PTGS2,RGS2,RGS7,VCAM1	94 (9)
cytokine		group	Activated	2.726	bias	1.94e-06	ADAMTS4,ADORA2A,BCL3,CCL5,CX3CL1,CXCL3,ITGA6,NOS2,PTGS2,SELE,UPP1,VCAM1	90 (16)
Gsk3		group	Activated	2.178		1.95e-06	ESR1,FSCN1,KDR,LDLR,NOS2,NR4A1,PTGS2,SPP1,TNFAIP3	125 (19)
ciglitazone		chemical drug		-1.2		1.95e-06	Ccl2,CCL5,ESR1,KLK3,NFKBIA,NOS2,PTGS2,SELE,VCAM1	113 (20)
dehydroisoandrosterone		chemical - endogenous mammalian		-1.969		1.95e-06	B2M,Ccl2,CYP1A1,ESR1,KLK3,NFKBIA,NOS2,SELE,VCAM1	144 (20)
STAT2	0.333	transcription regulator	Activated	2.197	bias	1.98e-06	Ccl2,CCL5,CXCL10,GBP6,IRF5,ISG15,RSAD2,ZBP1	93 (15)
CGAS		enzyme	Activated	2.195	bias	2.11e-06	CCL5,CXCL10,IFI44,ISG15,RSAD2	72 (8)
10-nitrooleate		chemical - endogenous mammalian	Inhibited	-2.236	bias	2.11e-06	Ccl2,NOS2,PTGS2,SELE,VCAM1
VIPR1	-0.053	G-protein coupled receptor	Activated	2.216	bias	2.11e-06	Ccl2,CCL5,CXCL10,CXCL3,NOS2	89 (14)
carbon tetrachloride		chemical toxicant	Activated	3.079	bias	2.14e-06	AK4,Ccl2,CCL5,CXCL10,Cxcl15,IGFBP5,IGFBP6,KDR,NDRG2,NOS2,NR4A1,PTGS2,SPP1,VCAM1	98 (20)
CREB1	0.42	transcription regulator		1.64		2.18e-06	ADORA2A,AK4,APOLD1,CH25H,CYFIP2,DUSP14,EGR4,GRIA1,HLA-A,HLA-DQB1,Ifi202b,LDLR,MARCKSL1,MEST,MYO1B,NFKBID,NOS2,NR4A1,NRP2,PLXNC1,PTGS2,RGS2,STC1,UPP1	143 (17)
ACKR2		G-protein coupled receptor	Inhibited	-2.646	bias	2.21e-06	CCL5,CXCL10,Cxcl9,Ifi27l2a/Ifi27l2b,IFI44,ISG15,RSAD2	66 (7)
HBB		transporter	Inhibited	-2.433	bias	2.21e-06	Ccl2,CCL5,CXCL10,CXCL3,Cxcl9,IL7,VCAM1	91 (12)
TNFSF12	0.023	cytokine	Activated	3.073		2.45e-06	BST1,Ccl2,CCL5,Ccl7,CXCL10,CXCL3,NFKBIA,PTX3,SELE,VCAM1	116 (15)
DEPTOR	-0.537	other	Inhibited	-2	bias	2.63e-06	CCL5,CX3CL1,CXCL10,VCAM1	98 (13)
NR1H3	0.015	ligand-dependent nuclear receptor		-1.715		2.67e-06	Ccl2,CCL5,Ccl7,CD274,CFB,CIDEA,CX3CL1,CXCL10,LDLR,NFKBIA,NOS2,PTGS2,TAP1,ZBP1	117 (21)
L-triiodothyronine		chemical - endogenous mammalian		1.152		2.67e-06	ACTC1,ACTG2,BCL3,C4A/C4B,ENPP2,ESR1,HLF,IGFBP6,ITGA7,LDLR,NOS2,NR4A1,Pln,PRKCQ,PTGS2,RELN,RGS2,SFRP2,UCP2	134 (18)
OSMR	0.238	transmembrane receptor				2.9e-06	BCL3,Ccl2,CXCL10,Cxcl9,GBP5,LBP,Mx2,Serpina3g (includes others)	97 (13)
5-N-ethylcarboxamido adenosine		chemical reagent		-0.319		2.91e-06	ADORA2A,BCL3,Ccl2,HK2,HLA-DQA1,HLA-DQB1,NOS2,NR4A1,PDE5A,RGS2	131 (16)
3-deoxy-2-octulosonic acid(2)-lipid A		chemical - endogenous non-mammalian	Activated	2.236		2.96e-06	Ccl2,CH25H,CXCL10,NOS2,PTGS2	120 (21)
S1PR2	0.008	G-protein coupled receptor		1.516	bias	2.96e-06	Ccl2,CCL5,PTGS2,SELE,VCAM1	106 (19)
HGF		growth factor		1.463	bias	2.98e-06	ADORA2A,ANK3,Ccl2,CCL5,HK2,IRF8,ISG15,ITGA6,LDLR,LYVE1,NID2,NOS2,NR4A1,PGF,PTGS2,RGS2,SEMA3A,SPP1,STC1,STIL,TNFAIP3,VCAM1	123 (19)
5-O-mycolyl-beta-araf-(1->2)-5-O-mycolyl-alpha-araf-(1->1')-glycerol		chemical - endogenous non-mammalian	Activated	2.333	bias	3.25e-06	ADORA2A,BCL3,CXCL10,CXCL3,NLRC3,PTGS2,RGS16,TNFAIP3,VCAM1	120 (12)
histamine		chemical - endogenous mammalian		0.224		3.25e-06	Ccl2,CCL5,CXCL10,LDLR,NOS2,NR4A1,PTGS2,SELE,SEMA3A	105 (15)
UPF2	0.013	other		0.808		3.41e-06	CACNB2,CYFIP2,DSP,KHDRBS3,PTGS2,TNFAIP3
SMARCA4	0.099	transcription regulator	Activated	2.394	bias	3.51e-06	ARRDC4,CD74,CYP1A1,EGR4,FAM167A,FHL2,GMFG,HHIP,IGFBP5,ITGA7,KDR,KHDRBS3,KIT,KLK3,LRMP,NR2F2,NRP2,PTX3,RGS2,SLAMF9,SPP1,TAP1,TBX2,TEC,UBD	104 (7)
TNFAIP3	0.916	enzyme		-1.794	bias	3.54e-06	Ccl2,CXCL10,NFKBIA,NOS2,SELE,TNFAIP3,VCAM1	124 (15)
PROC		peptidase		-0.245		3.54e-06	Ccl2,CXCL3,NOS2,NR4A1,SELE,TNFAIP3,VCAM1	112 (17)
IFNA4		cytokine	Activated	2.552	bias	3.54e-06	CD274,CXCL10,GBP5,ISG15,Mx2,RSAD2,ZBP1	81 (14)
flutamide		chemical drug		0.735		3.59e-06	Ccl2,CYP1A1,ESR1,FOXQ1,KDR,NOS2,NR4A1,TUBB3,WIF1	112 (7)
CD40	0.167	transmembrane receptor		1.991	bias	3.68e-06	Ccl2,CCL5,CX3CL1,CXCL10,Cxcl9,HLA-DQB1,IL4I1,NFKBIA,NOS2,PTGS2,SELE,TAP1,TNFAIP3,VCAM1	102 (13)
palmitic acid		chemical - endogenous mammalian	Activated	2.144		3.87e-06	Ccl2,CCL5,CIDEA,CXCL10,CXCL3,EGLN3,HK2,HTR2B,NFKBIA,NOS2,NR4A1,PTGS2,UCP2,VCAM1	88 (17)
CCL2		cytokine	Activated	2.353		3.95e-06	Ccl2,CCL5,CXCL10,CXCL3,EGLN3,HDC,HTR2B,PTGS2,VCAM1	101 (19)
hydrogen peroxide		chemical - endogenous mammalian	Activated	4.02		3.97e-06	Ccl2,CXCL3,CYP1A1,ENPP2,HDC,ITGA6,KDR,KIT,LDLR,NOS2,NR4A1,PGF,PTGS2,PTN,PTX3,SFRP2,SPP1,STC1,TAP1,TNFAIP3,UCP2,VCAM1	131 (22)
trichostatin A		chemical drug		0.396		3.98e-06	B2M,Ccl2,CDCA7,CXCL10,CXCL3,CYP1A1,ENPP2,ESR1,FLRT3,FST,HLA-DQB1,IRF8,KDR,KIT,KLK3,LDLR,MYO1B,NDRG2,NFKBIA,NOS2,PRG2,PTGS2,RELN,SELE,SEMA3A,Serpina3g (includes others),SPN,SPP1,TFPI2,TUBB3,VCAM1	138 (22)
CXCL3	1.052	cytokine	Activated	2.211	bias	4.05e-06	Ccl2,CCL5,CXCL10,CXCL3,ITGA6	121 (19)
PARP9	0.187	enzyme	Activated	2.236	bias	4.05e-06	CD74,HLA-DQA1,HLA-DQB1,IFI44,ISG15
CARD9		other		0.816	bias	4.18e-06	C3,Ccl2,CCL5,CXCL10,Cxcl9,NPTX1	122 (20)
TIRAP	-0.144	other		1.498		4.18e-06	CCL5,CXCL10,CXCL3,PTGS2,SELE,VCAM1	89 (19)
TNFSF14		cytokine				4.18e-06	Ccl2,CCL5,CXCL10,CXCL3,Cxcl9,VCAM1	100 (18)
PI3K (family)		group	Activated	2.547		4.41e-06	CD274,Cdkn1c,CXCL10,EGLN3,ESR1,ISG15,ITGA6,NOS2,PTGS2,SOX4	138 (22)
C8		complex		0		4.69e-06	Ccl2,CXCL3,SELE,VCAM1	87 (9)
salmonella typhimurium lipopolysaccharide		chemical - endogenous non-mammalian	Activated	2	bias	4.69e-06	Ccl2,CCL5,NOS2,PTGS2
PSMB9	0.53	peptidase		1.98		4.69e-06	HLA-A,NFKBIA,TAP1,TNFAIP3	96 (10)
ING4	-0.037	transcription regulator		0		4.69e-06	Ccl2,CXCL10,NFKBIA,NFKBID	99 (15)
C9		other		0		4.69e-06	Ccl2,CXCL3,SELE,VCAM1	87 (9)
C7		other		0		4.69e-06	Ccl2,CXCL3,SELE,VCAM1	87 (9)
HDL		complex		-1.743		4.76e-06	Ccl2,CCL5,CX3CL1,EGLN3,LDLR,PTGS2,VCAM1	103 (15)
EP300	-0.228	transcription regulator	Activated	2.177	bias	4.89e-06	ADORA2A,B2M,CXCL3,CYP1A1,DTX1,GNG2,IGFBP6,ITGA6,KDR,KLK3,NFKBIA,NOS2,NR4A1,PTGS2,RNASEL,RSAD2,SELE,SH3GL3,SLC6A19,TNFAIP3	107 (16)
NOSTRIN	-0.057	transcription regulator	Inhibited	-2.423	bias	5.09e-06	Ccl2,CCL5,KDR,KIT,PGF,SELE	69 (7)
DUSP1	0.359	phosphatase		-1.474		5.17e-06	Ccl2,CFB,CIDEA,CXCL10,CXCL3,NOS2,PTGS2,SELE,UBD,VCAM1	101 (20)
JUND	-0.054	transcription regulator				5.2e-06	BCL3,CCL5,Ifi202b,NOS2,NR4A1,NTS,SOX4,SPP1	72 (7)
deferoxamine		chemical drug		0.78		5.28e-06	EGLN3,F13A1,GAS7,HK2,HTR2B,IGFBP5,KIT,NOS2,RSAD2,SELE,SPP1,TEC,VCAM1	136 (20)
Salmonella enterica serotype abortus equi lipopolysaccharide		chemical toxicant	Activated	3.43	bias	5.47e-06	ARRDC4,Ccl2,CCL5,CD274,CFB,CXCL3,HECW2,ISG15,PLAC8,PTGS2,PTX3,TFPI2	134 (18)
ADIPOQ		other		-0.401		5.47e-06	BCL3,Ccl2,CCL5,CXCL10,CXCL3,LDLR,NFKBIA,NOS2,PTGS2,TNFAIP3,UCP2,VCAM1	97 (17)
RETN		other		1.253		5.48e-06	CX3CL1,CXCL3,LDLR,PTGS2,SELE,SPP1,VCAM1	98 (19)
IRF9	0.395	transcription regulator		0.254		5.48e-06	CXCL10,Cxcl9,GBP6,IRF5,IRF8,ISG15,ZBP1	88 (13)
quercetin		chemical drug		-1.975		5.49e-06	ARRDC4,Ccl2,CXCL10,CYP1A1,ESR1,KLK3,LDLR,NOS2,PTGS2,SELE,VCAM1	119 (22)
FSH		complex		1.824		5.56e-06	ACTG2,CH25H,CX3CL1,CYFIP2,DUSP14,ESR1,FST,HK2,LDLR,NPPC,NR4A1,PCSK6,PTGS2,RGS16,RGS7,TFPI2,TNFAIP3,TP53I11,UPP1	147 (22)
SAMSN1		other	Activated	3	bias	5.75e-06	Ccl7,CXCL10,Cxcl9,HDC,IRGM,ISG15,Mx2,PTGS2,RSAD2	90 (7)
DOCK8	0.078	other	Activated	2.828	bias	5.81e-06	CXCL10,Cxcl9,HDC,IRGM,ISG15,Mx2,PTGS2,RSAD2
CDKN2A		transcription regulator		1.364		5.98e-06	C3,Ccl2,CCL5,Ccl7,CX3CL1,CXCL10,Cxcl15,Cxcl9,FHL2,FST,GAS7,IGFBP5,IL2RG,KLK3,PTGS2,PTX3	145 (19)
Hbb-b1	-1.853	transporter	Activated	2.03	bias	6.88e-06	Ccl2,Ccl7,CD74,CXCL10,Cxcl9,EGLN3,IL2RG,UCP2,VCAM1	82 (7)
NR3C2	0.164	ligand-dependent nuclear receptor		1.534		7.05e-06	ABCC9,Ccl2,CYFIP2,HLA-DQB1,KDR,NDRG2,PGF,PTGS2,RGS2,TUBB3	34 (3)
MSR1		transmembrane receptor				7.16e-06	CCL5,CXCL10,CXCL3,ISG15,NOS2	121 (17)
linoleic acid		chemical - endogenous mammalian		-1.132		7.21e-06	Ccl2,KDR,LDLR,NFKBIA,NOS2,PTGS2,UCP2,VCAM1	101 (18)
D-glucose		chemical - endogenous mammalian		0.855		7.31e-06	ACTG2,BVES,C3,Ccl2,CX3CL1,DTNA,FST,HAPLN1,HK2,Ifi27l2a/Ifi27l2b,KDR,LDLR,LMOD1,MRVI1,NOS2,NR4A1,NTS,PTGS2,RGS2,SELE,SPP1,TUBB3,UCP2,VCAM1,XK	113 (19)
DNASE2	-0.036	enzyme		-1.951	bias	7.37e-06	CH25H,CXCL10,ISG15,Ms4a4b (includes others),RSAD2,ZBP1
DNMT3B	0.227	enzyme		0		7.38e-06	ACTC1,CCL5,ESR1,HLA-DQB1,IRF5,KDR,KIT,NOS2,PTN,RGS16,S1PR1,SFRP2
ADCYAP1		other		-1.525		7.44e-06	Ccl2,CCL5,Cdkn1c,CXCL10,CXCL3,DCDC2,ENPP2,FST,HAPLN1,MEST,NFKBIA,NOS2,TTYH1,UCP2	126 (19)
RNASEH2B	-0.143	enzyme				7.72e-06	CCL5,CXCL10,IFI44,ISG15
PARP14	0.177	enzyme		1.98		7.72e-06	CCL5,CXCL10,ISG15,Mx2	80 (5)
KLF6	-0.082	transcription regulator		-0.083		8.01e-06	Ccl2,CYP1A1,NFKBIA,NOS2,NR4A1,PTGS2,TFPI2,VAV3	110 (17)
ATF3	0.505	transcription regulator		-1.354		8.2e-06	CCL5,CX3CL1,GBP6,KLK3,LDLR,NOS2,Pln,RSAD2,SELE	132 (20)
IFNA2		cytokine	Activated	3.665	bias	8.59e-06	B2M,CCL5,CXCL10,EGLN3,HLA-A,IFI44,IRF5,ISG15,Mx2,RSAD2,TAP1,UBD,VCAM1,ZBP1	90 (15)
naringenin		chemical - endogenous non-mammalian		-1.091		8.79e-06	CCL5,CXCL10,CYP1A1,LDLR,NOS2,PTGS2	127 (21)
POU2F1	-0.002	transcription regulator		-0.435		8.82e-06	CYP1A1,ESR1,Ifi202b,KLK3,NOS2,SELE,SERPING1,SPP1,TNFAIP3,VCAM1	115 (10)
LGALS3	-0.4	other	Activated	2.415		9.73e-06	Ccl2,CXCL3,ENPP2,FSCN1,IGFBP5,ITGA6,NOS2,SELE,VCAM1	122 (17)
IL22		cytokine		0.075		1.02e-05	C3,CCL5,CD274,CXCL10,CXCL3,Cxcl9,IL33,LBP,NOS2,PTGS2	103 (18)
JUN	0.193	transcription regulator	Activated	2.999		1.04e-05	BCL3,Ccl2,CD274,CX3CL1,CXCL10,Cxcl15,CXCL3,HMGA1,IGFBP6,KDR,LBP,NFKBIA,NOS2,NR4A1,NTS,PTGS2,PTX3,SPP1,VAV3,VCAM1	124 (15)
lipoxin A4		chemical - endogenous mammalian		-1.382		1.04e-05	Ccl2,CYP1A1,ESR1,NOS2,PTGS2,SELE	117 (27)
bee venom		chemical - endogenous non-mammalian		1.536		1.06e-05	Ccl2,CCL5,Ccl7,IL4I1,NFKBIA,NOS2,PTGS2,RGS2,TNFAIP3	132 (14)
SAFB	0.123	other	Inhibited	-2.449	bias	1.06e-05	B2M,CCL5,CD74,CX3CL1,CXCL10,TBX2,UBD
HIF1A	0.292	transcription regulator	Activated	2.973	bias	1.07e-05	Ccl2,CCL5,CD274,Cdkn1c,CXCL3,DTX1,EDNRB,EGLN3,FHL2,FSCN1,HK2,IGFBP5,NOS2,NR4A1,PFKFB4,PGF,PLAC8,PTGS2,VCAM1	113 (19)
POR	-0.244	enzyme	Inhibited	-2.538		1.1e-05	CD74,Ces2c,CYP1A1,HLA-A,HLA-DMA,HLA-DQA1,HLA-DQB1,HLA-DRB5,HLF,KDR,LDLR,UBD
IL18	-0.038	cytokine	Activated	3.201	bias	1.1e-05	ADAM19,Ccl2,CCL5,CXCL10,CXCL3,ENPP2,IL18BP,KIT,NOS2,PTGS2,SPP1,VCAM1	120 (19)
MYBPC3		other				1.11e-05	Ccl2,CXCL10,MYBPC2
EGFL7	0.052	other				1.11e-05	NFKBIA,SELE,VCAM1
Nr1h		group	Inhibited	-2.763		1.2e-05	BCL3,C3,Ccl2,CCL5,CXCL10,MARCKSL1,Mx2,NOS2,PRKCQ,PTGS2,TAP1	132 (20)
J11-Cl		chemical reagent		-0.762		1.2e-05	CX3CL1,Cxcl15,CXCL3,PTGS2	94 (16)
captopril		chemical drug		-0.368		1.2e-05	C4A/C4B,IGFBP6,LTBP2,NOS2,PTGS2,SERPING1,SPP1,UPP1	93 (11)
Ccl2	2.904	cytokine	Activated	2.384		1.2e-05	Ccl2,CCL5,Ccl7,CXCL10,CXCL3,KDR,VCAM1	89 (14)
pentoxifylline		chemical drug		-1.741	bias	1.23e-05	Ccl2,CCL5,CXCL3,NFKBIA,NOS2,VCAM1	117 (15)
TAZ	-0.049	enzyme		-1.982		1.25e-05	ENPP2,KIT,LDLR,NOS2,PTGS2,PTX3,S1PR1,TFPI2,UPP1	80 (7)
CREM	0.021	transcription regulator		1.026		1.27e-05	ACTC1,APOLD1,CH25H,DUSP14,EGR4,LDLR,MEST,NFKBID,NOS2,NR4A1,Pln	67 (6)
tacrolimus		chemical drug		-1.543		1.3e-05	ADAM19,Ccl2,CCL5,CD74,CXCL10,DACH1,IL33,MARCKSL1,NFKBIA,NOS2,NPTX1,NR4A1,PTGS2,SPP1	115 (20)
heme		chemical - endogenous mammalian		-1.912		1.36e-05	Ccl2,CCL5,CXCL10,CXCL3,Cxcl9,IL7,NOS2	120 (18)
PRL		cytokine		0.684	bias	1.36e-05	B2M,BOK,CXCL10,ESR1,IFI44,IGFBP5,ISG15,LYVE1,NOS2,PDPN,PROX1,RASD1,RSAD2,SFRP2,SPP1	156 (24)
KDM2B	0.021	enzyme	Inhibited	-2.449		1.44e-05	Ccl2,CCL5,Ccl7,CX3CL1,CXCL10,SFRP2	84 (11)
NKX2-3	-0.103	transcription regulator		-0.764		1.49e-05	CBS/CBSL,CX3CL1,F2RL3,FLRT2,IL18BP,MMRN1,PLEKHA4,PTGS2,SEMA3A,TAP1,TFPI2,TNFAIP8L1,VCAM1
EGR1	0.555	transcription regulator		1.543	bias	1.53e-05	Ccl2,Ccl7,Cdkn1c,Cxcl15,CXCL3,ENPEP,GRIA1,LDLR,NR4A1,PTGS2,SPP1,VCAM1	145 (19)
luteolin		chemical drug	Inhibited	-2.606	bias	1.53e-05	CXCL10,Cxcl9,CYP1A1,NOS2,NR2F2,PTGS2,SELE	127 (21)
FGFR2	-0.099	kinase		-1.691		1.55e-05	EFHC2,ENPEP,FLRT3,FOXQ1,FST,HHIP,KBTBD11,MEST,SPP1,VCAM1
curcumin		chemical drug	Inhibited	-2.085		1.59e-05	ADAMTS4,ATP1B2,Ccl2,CCL5,CXCL3,CYP1A1,IGFBP5,ITGA6,MARCKSL1,NFKBIA,NOS2,PGF,PTGS2,PTN,SELE,UCP2,VCAM1	94 (18)
enterotoxin B		biologic drug	Activated	2.804	bias	1.6e-05	Ccl2,CCL5,Ccl7,CXCL10,CXCL3,Cxcl9,IL33,RSAD2	135 (15)
mitoxantrone		chemical drug				1.68e-05	CXCL10,Cxcl9,KLK3,Mx2,RSAD2,SFRP2	83 (9)
CGS 21680		chemical reagent		-1.166		1.68e-05	ADORA2A,Ccl2,CCL5,NOS2,PTGS2,RGS2	131 (21)
apigenin		chemical - endogenous non-mammalian		-1.906	bias	1.76e-05	Ccl2,CXCL3,CYP1A1,KLK3,NOS2,PTGS2,SELE,VCAM1	134 (24)
LECT2		other		0.339		1.78e-05	C3,Ccl2,CXCL10,CXCL3	123 (14)
IL15	-0.057	cytokine		1.529	bias	1.79e-05	ACTG2,Ccl2,CCL5,CD2,CD274,CD74,CXCL10,DUSP14,EPHB1,HK2,IL2RG,KIT,NFKBIA,NOS2,RGS16,S1PR1,SPN,UPP1,VCAM1	121 (18)
Ikb		group		0.317	bias	1.87e-05	CFB,CXCL3,NR4A1,PTGS2,TNFAIP3	85 (9)
TRPV4	0.069	ion channel	Activated	2.236	bias	1.87e-05	Ccl2,CCL5,Ccl7,CXCL10,VCAM1	110 (19)
HEY1	-0.024	transcription regulator		-0.67	bias	1.87e-05	Cdkn1c,KDR,NR2F2,PROX1,TBX2	32 (4)
MEF2C	-0.15	transcription regulator		-0.928	bias	1.9e-05	ACTC1,Ccl2,FAP,MYOM1,MYOZ2,NR4A1,Pln,PTGS2,SCN5A,SFRP2	16 (2)
CpG ODN 1826		chemical reagent	Activated	2.267		1.93e-05	Apol11b (includes others),CCL5,CD274,CXCL10,CXCL3,HLA-DQB1,NOS2,RGS2	117 (19)
propranolol		chemical drug		0.277		1.96e-05	CYP1A1,HK2,NFKBIA,NOS2,Pln,PTGS2	127 (26)
PTEN	-0.03	phosphatase		-0.697		2.02e-05	BCL3,C3,Ccl2,CCL5,CD274,CXCL10,DTX1,ESR1,GNG2,GPR160,HLA-DMA,IGFBP5,IGFBP6,ISG15,KDR,NOS2,NR2F2,NTS,PTGS2,PTN,SOX4,SPP1,VAV3,VCAM1	133 (21)
FFAR3		G-protein coupled receptor		1.463		2.11e-05	CBS/CBSL,CCL21,CXCL10,Cxcl9,DUSP14,ENPP2,GBP6,RELN
TRAF2	-0.002	enzyme		1.134		2.11e-05	CCL5,CXCL10,CXCL3,NOS2,SELE,Serpina3g (includes others),ST8SIA6,TNFAIP3	93 (14)
LDL		complex	Activated	2.292		2.12e-05	C3,CBS/CBSL,Ccl2,CCL5,CXCL10,CXCL3,EDNRB,LDLR,NOS2,NR4A1,PTGS2,SELE,TNFAIP3,VCAM1	100 (19)
resveratrol		chemical drug	Inhibited	-2.397		2.13e-05	Ccl2,CCL5,CX3CL1,CXCL10,CYP1A1,ESR1,ISG15,KDR,KLK3,LDLR,NFKBIA,NOS2,PTGS2,SPP1,VCAM1	137 (22)
cisplatin		chemical drug	Activated	2.297		2.14e-05	ANK1,C4A/C4B,Ccl2,CCL5,CXCL10,CXCL3,EPS8L2,ESR1,GRIA1,HIC1,HK2,ITGA7,KCNK5,KLK3,LBP,LRMP,NOS2,PARD6G,PRG2,PTGS2,Serpina3g (includes others),SLC15A2,SPP1,TAP1,UCP2,UPP1,VCAM1	118 (24)
CSF2		cytokine	Activated	3.241	bias	2.16e-05	BCL3,C3,C4A/C4B,Ccl2,CD74,CXCL10,Cxcl9,HDC,HK2,HLA-DQB1,IRF5,NFKBIA,NOS2,NR4A1,NUAK2,PTGS2,SPP1,TNFAIP3,UBD,UPP1	139 (14)
SP1	0.045	transcription regulator		1.889	bias	2.19e-05	ANK1,CBS/CBSL,Ccl2,CCL5,Ces2c,CXCL10,CXCL3,ESR1,GRIA1,HDC,HK2,HMGA1,KDR,KIT,LDLR,NFKBIA,PTGS2,PTN,SPN,SPP1,TFPI2,TNFAIP3	125 (18)
WNT3A		cytokine		0.575		2.21e-05	ADAMTS4,ARRDC4,FHL2,FMOD,IGFBP5,KDR,KIT,LRRC17,NOS2,PTGS2,SFRP2,TUBB3,VCAM1,WIF1	130 (20)
glucocorticoid		chemical drug	Inhibited	-2.092		2.3e-05	BCL3,CCL5,CD2,CD74,IRF8,KLK3,NFKBIA,NOD2,NOS2,PTGS2,RASD1,SELE,SPP1,STC1,VCAM1	114 (17)
fatty acid		chemical - endogenous mammalian		1.64	bias	2.33e-05	Ccl2,CIDEA,LDLR,NFKBIA,NOS2,NR4A1,PTGS2,UCP2,VCAM1	90 (18)
VEGFA	0.385	growth factor	Activated	2.321	bias	2.49e-05	AK4,Ccl2,CXCL10,HLA-DQB1,IGFBP5,KDR,NOS2,NR2F2,NR4A1,PTGS2,RASGRP3,SELE,STC1,TFPI2,VCAM1	110 (20)
EOMES		transcription regulator		-1.667		2.5e-05	ACTC1,APLNR,DUSP14,KDR,MEOX1,NRP2,PDPN,RGS2,TFPI2
CCL3L3		cytokine				2.54e-05	Ccl2,CCL5,CXCL10,Cxcl9	101 (11)
S-nitrosoglutathione		chemical toxicant		-0.573		2.61e-05	CCL5,CXCL10,NFKBIA,PTGS2,SELE,VCAM1	112 (16)
ATP		chemical - endogenous mammalian		1.782		2.69e-05	Ccl2,CXCL10,CXCL3,IL33,NOS2,NR4A1,PTGS2,TUBB3,VCAM1	111 (21)
CCR2		G-protein coupled receptor		1.772	bias	2.69e-05	Ccl2,CCL5,Ccl7,CX3CL1,CXCL10,CXCL3,Cxcl9,F13A1,HTR2B	135 (17)
SPI1		transcription regulator	Activated	2.464		2.73e-05	Acp5,Cdkn1c,CXCL10,Cxcl9,HIC1,IFI44,ISG15,KIT,KLK3,NOS2,PRG2,PTGS2,RSAD2,SPP1	146 (22)
beta-sitosterol		chemical reagent				2.75e-05	PTGS2,SELE,VCAM1
MCOLN2		ion channel				2.75e-05	Ccl2,CCL5,CXCL3
2-cyclohexen-1-one		chemical - endogenous non-mammalian				2.75e-05	NOS2,PTGS2,VCAM1
pyridoxal phosphate-6-azophenyl-2',4'-disulfonic acid		chemical reagent				2.75e-05	Ccl2,NOS2,PTGS2	130 (21)
MAPK3	-0.028	kinase		1.569	bias	2.75e-05	EGR4,ESR1,HDC,HLA-DQB1,NR4A1,PTGS2,RGS2,SPP1	146 (20)
TAF4B	0.294	transcription regulator				2.83e-05	FST,ITGA6,NFKBIA,SPP1,TNFAIP3
dicarbethoxydihydrocollidine		chemical toxicant	Activated	2.224	bias	2.83e-05	Ccl2,NOS2,SPP1,UBD,VCAM1
lactacystin		chemical - protease inhibitor		-0.262		2.84e-05	Ccl2,Cdkn1c,CYP1A1,ESR1,HLA-A,IGFBP5,LDLR,NFKBIA,NOS2,NR4A1,PTGS2,VAV3	143 (20)
KITLG	0.142	growth factor		0.99	bias	2.87e-05	B2M,Ccl2,CX3CL1,CXCL3,EDNRB,Ifi27l2a/Ifi27l2b,KDR,KIT,LDLR,NFKBIA,PRKCQ,PTGS2,UCP2	106 (17)
losartan potassium		chemical drug		-1.291	bias	2.89e-05	Ccl2,CXCL10,CXCL3,NOS2,PTGS2,SPP1,TUBB3,UCP2,VCAM1	133 (22)
TAC1		other	Activated	2.051	bias	2.99e-05	Ccl2,CXCL10,Cxcl15,CXCL3,HDC,NOS2,PTGS2,SELE	96 (18)
IFIH1	0.056	enzyme		1.165	bias	3e-05	CCL5,CXCL10,Cxcl15,ISG15,NFKBIA,RSAD2	105 (20)
ARHGAP21	0.414	other	Activated	2.449	bias	3e-05	CXCL10,Cxcl9,HDC,IRGM,Mx2,PTGS2
PPARGC1A	-0.504	transcription regulator		-1.559		3.16e-05	C3,Ccl7,CIDEA,CXCL10,CYP1A1,FIBIN,HAPLN1,HK2,IGFBP5,IGFBP6,LDLR,PTGS2,PTN,SEMA3A,STC1,UCP2	102 (21)
IGF2	-0.764	growth factor	Activated	2.243		3.21e-05	Ccl2,Cdkn1c,Ifi202b,IGFBP5,IGFBP6,NFKBIA,NOS2,PRKCQ,PTGS2,RGS16,SPP1	121 (18)
Histone h3		group				3.29e-05	ANK1,B2M,Ccl2,CCL5,CSPG4,CXCL10,ESR1,Ifi27l2a/Ifi27l2b,KDR,KLK3,NFKBIA,NOS2,PTGS2,RELN,RSAD2,SPP1,TBX2,TNFAIP3,UPP1	148 (22)
Sn50 peptide		chemical toxicant		-1.118	bias	3.31e-05	Ccl2,CXCL10,Cxcl15,NOS2,PTGS2,STC1,VCAM1	128 (17)
fulvestrant		chemical drug		1.786		3.35e-05	C3,Ccl2,CCL5,CD74,CXCL10,ESR1,IGFBP5,KLK3,LDLR,MYO1B,NOS2,PTGS2,STC1,VCAM1	114 (21)
ALB		transporter	Activated	2.191		3.43e-05	Ccl2,CCL5,CX3CL1,EDNRB,NOS2,PTGS2	115 (15)
ECSIT	0.023	transcription regulator	Activated	2.213	bias	3.44e-05	BCL3,NFKBIA,NFKBIE,PTGS2,TNFAIP3	85 (9)
ozone		chemical toxicant	Activated	2.199	bias	3.44e-05	Ccl2,Ccl7,CXCL10,CXCL3,SPP1	86 (12)
VCP	0.032	enzyme	Activated	2		3.52e-05	Ccl2,CCL5,NOS2,VCAM1	115 (21)
picryl chloride		chemical toxicant		1.961	bias	3.52e-05	CXCL10,CXCL3,HLA-DQA1,SPP1
cerulenin		chemical drug		-1.982		3.52e-05	Ccl2,CCL5,ESR1,UCP2	63 (7)
MYOC		other				3.54e-05	ENPEP,FSCN1,HHIP,IGFBP5,PLXNC1,SPP1,STC1,UPP1
ERBB2	0.101	kinase		1.84		3.65e-05	ADAM19,BCL3,CCL5,Ccl7,CDCA7,CDH3,CXCL10,CXCL3,Cxcl9,DTX1,ESR1,FSCN1,GBP6,IGFBP5,IGFBP6,ITGA6,KDR,KIT,KLK3,LTBP2,NCAPG,NOS2,PLAC8,PTGS2,SOX4,TAP1	132 (18)
FOXL2		transcription regulator	Activated	2.619		3.66e-05	CH25H,CXCL3,FST,PTGS2,RGS2,SOX4,TNFAIP3	100 (9)
GLI1		transcription regulator		1.394	bias	3.8e-05	Ccl2,Cxcl15,GMFG,HHIP,IGFBP6,KLK3,MEST,NDRG2,NR2F2,RNASEL,SPP1,WIF1	102 (7)
TRAF3	0.074	enzyme		-0.82		3.84e-05	CCL5,CXCL10,ISG15,NFKBIA,NFKBIE,Serpina3g (includes others),ST8SIA6,TNFAIP3	99 (14)
NOS3	0.196	enzyme		-1.196		3.92e-05	Ccl2,CXCL3,NOS2,PDE5A,PTGS2,VCAM1	111 (22)
HNRNPK	0.026	transcription regulator		1.026		3.92e-05	IL2RG,ITGA6,LDLR,PTGS2,SPN,UCP2
USP18	0.655	peptidase	Inhibited	-2.2	bias	4.13e-05	Acp5,Ccl2,CCL5,CXCL10,ISG15	117 (16)
JAK inhibitor I		chemical - kinase inhibitor	Inhibited	-2.236	bias	4.13e-05	C3,CXCL10,CXCL3,NOS2,PTGS2	108 (15)
Tgf beta		group		-0.346		4.26e-05	Acp5,Ccl2,CCL5,CXCL10,CXCL3,FSCN1,FST,IGFBP5,NOS2,PFKFB4,PTGS2,SELE,SPP1,VCAM1	109 (21)
CD44	0.529	other	Activated	2.138	bias	4.38e-05	Ccl2,CCL5,Ccl7,CIDEA,CX3CL1,Cxcl9,LTBP2,MYO1B,SFRP2,SPP1,VCAM1,WNT2	106 (18)
CSF3	1.217	cytokine		-0.106		4.41e-05	Ccl2,CCL5,CXCL3,ENPP2,HDC,HLA-DQA1,IL7,KIT,LBP,TNFAIP3,VCAM1	118 (15)
STK40	0.187	kinase				4.45e-05	Ccl2,HLA-DQA1,PDPN,PTGS2,ST8SIA6,WNT2
LTA		cytokine		1.633	bias	4.45e-05	Ccl2,CCL21,HDC,LYVE1,PDPN,PTGS2	103 (15)
Hbb-b2	-1.853	other	Activated	2.449	bias	4.45e-05	Ccl2,Ccl7,CD74,CXCL10,Cxcl9,IL2RG	79 (7)
FOS	0.185	transcription regulator		1.757		4.49e-05	Acp5,ANK3,CCL5,ENAH,FLRT2,IGFBP5,IGFBP6,ITGA6,LTBP2,MMRN1,NPTX1,NR4A1,NTS,PDPN,PTCHD1,PTGS2,SEMA3A,SFRP2,SPP1,VAV3,VCAM1	112 (12)
staurosporine		chemical - kinase inhibitor		-1.12		4.7e-05	CYP1A1,HDC,IGFBP5,ISG15,NOS2,NR4A1,PTGS2,S1PR1,SELE	129 (20)
TREX1	0.32	enzyme		-1.958	bias	4.75e-05	CXCL10,Ifi27l2a/Ifi27l2b,IFI44,ISG15
NFAT5	-0.238	transcription regulator	Activated	2.77	bias	4.88e-05	Ccl2,CXCL10,CXCL3,HECW2,NFKBIA,NOS2,SPP1,TNFAIP3	113 (12)
AG490		chemical - kinase inhibitor	Inhibited	-2.634	bias	4.88e-05	Ccl2,CCL5,ENPP2,ESR1,IL7,NOS2,PTGS2,SPP1	135 (21)
SHH		peptidase	Activated	2.412	bias	4.89e-05	DTX1,HHIP,HK2,HMGA1,IGFBP5,NR2F2,NR4A1,PGF,SFRP2,SPP1,TUBB3	105 (7)
C3	1.158	peptidase	Activated	2.048		4.92e-05	C3,Ccl2,CCL5,CXCL10,CXCL3,NOS2,UCP2	101 (19)
Bay 11-7082		chemical - kinase inhibitor	Inhibited	-2.58	bias	4.92e-05	ADORA2A,Ccl2,CCL5,CXCL3,NOS2,PTGS2,VCAM1	121 (20)
trovafloxacin		chemical drug		1.912		4.92e-05	B2M,CXCL3,HLA-A,LDLR,NFKBIA,SELE,TNFAIP3	115 (9)
bucladesine		chemical toxicant	Activated	2.537		4.94e-05	CXCL10,CXCL3,EGLN3,FST,HHIP,IGFBP5,IGFBP6,KIT,LDLR,NOS2,NR4A1,PDE5A,PTGS2,RGS16,RGS2,STC1	139 (23)
ARRB1	-0.112	other		-0.728		4.94e-05	Ccl2,ENAH,NOS2,PTGS2,SPP1	117 (21)
GW3965		chemical reagent	Inhibited	-2.961		5.02e-05	Ccl2,CCL5,Ccl7,CXCL10,GNG2,LDLR,NFKBIA,NOS2,PTGS2	109 (19)
gentamicin		chemical drug	Activated	2.066		5.04e-05	C4A/C4B,CBS/CBSL,Ccl2,CXCL10,CYP1A1,ENPP2,NEURL3,NOS2,PTN,SLC6A19,SPP1,TAP1,VCAM1	128 (19)
CD28		transmembrane receptor		1.909	bias	5.28e-05	CD274,CH25H,DUSP14,HK2,HLA-DQB1,IGFBP5,IGFBP6,IL4I1,IL7,IRF8,MMRN1,NFKBIA,NR4A1,PTGS2,TFPI2,TNFAIP3	116 (15)
TRAF6	0.059	enzyme	Activated	2.621	bias	5.41e-05	Ccl2,CD274,IRF5,NOS2,SELE,TNFAIP3,UBD	130 (17)
BRCA1		transcription regulator		0.21		5.41e-05	ANXA8/ANXA8L1,CCL5,CDH3,CYP1A1,ENPP2,ESR1,FHL2,KIT,KLK3,STC1,TAP1	119 (13)
HOXA10	-0.173	transcription regulator		-0.302		5.69e-05	ATP1A2,Cdkn1c,ENPP2,FST,HLA-DQA1,HLA-DQB1,HLF,IGFBP5,NDRG2,NR4A1,PDPN
SMAD7	0.113	transcription regulator		-1.225		5.69e-05	Ccl2,CCL5,CXCL10,FST,ITGA6,ITGA7,LTBP2,NFKBIA,NID2,NOS2	100 (18)
omeprazole		chemical drug				5.69e-05	ADORA2A,CYP1A1,FST,HDC,ITGA6,NOS2	106 (6)
PDLIM2	-0.056	other		-0.707		5.7e-05	BST1,ENPP2,GNG2,GSTM2,IFI44,IL7,KIT,NUDT11
E. coli lipopolysaccharide		chemical - endogenous non-mammalian	Activated	2.598	bias	5.94e-05	Ccl2,CCL5,CXCL10,CXCL3,NOS2,SELE,VCAM1	107 (22)
PD98059		chemical - kinase inhibitor	Inhibited	-3.433	bias	5.95e-05	C3,Ccl2,CCL5,CD74,CDH3,CXCL10,Cxcl15,CXCL3,CYP1A1,EDNRB,GAS7,GRIA1,LDLR,NOS2,NR4A1,PCSK6,PTGS2,SELE,SPP1,STC1,VCAM1	100 (18)
BMP10		growth factor		1.924	bias	6.26e-05	Cdkn1c,NFKBIA,SELE,VCAM1
TNFRSF12A	-0.23	transmembrane receptor				6.26e-05	Ccl2,CCL5,CXCL10,MYBPC2	80 (9)
CXCL2	0.425	cytokine		1.998	bias	6.26e-05	Ccl2,CCL5,CXCL10,CXCL3	97 (16)
Cux1	-0.055	transcription regulator	Inhibited	-2	bias	6.26e-05	CCL5,Ccl7,CXCL10,Cxcl9
concanamycin A		chemical drug		1.204	bias	6.26e-05	NFKBIA,NOS2,SELE,VCAM1	116 (19)
AIP	-0.127	transcription regulator		-0.447		6.41e-05	CYP1A1,PDE7B,RGS16,RGS2,RGS7,S1PR1
BAPTA-AM		chemical reagent	Inhibited	-2.395	bias	6.41e-05	CXCL10,CYP1A1,NR4A1,PTGS2,SELE,VCAM1	123 (22)
Lh		complex	Activated	2.172		6.45e-05	ACTG2,CYFIP2,DUSP14,FST,HK2,PTGS2,PTX3,RGS16,RGS7,TFPI2,TNFAIP3,TP53I11,UPP1	137 (15)
SASH1	-0.445	other	Activated	2.646	bias	6.51e-05	CXCL10,HDC,IRGM,ISG15,Mx2,PTGS2,RSAD2	80 (7)
calcitriol		chemical drug		1.463		6.57e-05	Acp5,ADAM19,BCL3,C3,CXCL10,CXCL3,CYP1A1,ENPEP,ESR1,HK2,IGFBP5,ISG15,LRRC17,NFKBIA,NOD2,PTGS2,RSAD2,SPP1,TAP1,TNFAIP3,UCP2	128 (17)
LDLR	0.61	transporter				6.59e-05	Ccl2,CCL5,Ccl7,CD274,CFB,CX3CL1,LDLR,SELE,SPP1,TAP1,VCAM1,ZBP1	119 (17)
N-nitro-L-arginine methyl ester		chemical drug		1.341		6.62e-05	Ccl2,CXCL3,LDLR,NFKBIA,NOS2,PTGS2,SELE,VCAM1	102 (17)
CSF1	0.383	cytokine	Activated	2.372	bias	6.89e-05	Acp5,Ccl2,CCL5,Ccl7,CXCL3,FHL2,HK2,IL18BP,IRF5,IRF8,TNFAIP3,VCAM1	137 (16)
C5		cytokine	Activated	2.342		6.93e-05	Ccl2,CCL5,CXCL10,CXCL3,NFIX,NFKBIA,SELE,TNFAIP3,VCAM1	105 (16)
GNA14	0.17	enzyme				7.12e-05	CSPG4,CX3CL1,CXCL3,FST,HK2,NR4A1,PTGS2	101 (13)
WNT5A		cytokine	Inhibited	-2.121		7.37e-05	ENPP2,ESR1,IRF8,KIT,NOS2,PGF,PTGS2,SPP1,STC1	157 (24)
decitabine		chemical drug		1.865		7.64e-05	B2M,Ccl2,CCL5,CDCA7,CDH3,CXCL10,CXCL3,CYP1A1,EDA2R,EGR4,ESR1,FLRT3,HIC1,HK2,ISG15,LDLR,MYO1B,NFKBIA,NOS2,NPTX1,PTGS2,RELN,SPP1,TFPI2,TUBB3,WIF1	141 (22)
Calcineurin protein(s)		complex		0.289		7.78e-05	CCL5,CXCL3,DUSP14,NR4A1,PTGS2,RGS2,SPP1	115 (18)
MAPK14	0.088	kinase		1.034		8.01e-05	Ccl2,CCL5,Ccl7,CXCL10,Cxcl9,KDR,LDLR,NOS2,PTGS2,VCAM1,WIF1	107 (18)
IFN type 1		group	Activated	2.395	bias	8.07e-05	Ccl2,CCL5,CX3CL1,CXCL10,Cxcl9,ISG15	82 (13)
FHL2	-0.817	transcription regulator		-0.842		8.07e-05	Ccl2,CXCL10,FHL2,NOS2,S1PR1,SPP1	141 (20)
HOXC8		transcription regulator		-0.555		8.09e-05	ADAM19,Ccl2,Ccl7,CXCL10,SPP1
CORT		other	Inhibited	-2.213	bias	8.09e-05	Ccl2,CCL5,Ccl7,CXCL10,CXCL3
PLC		group		0.152		8.09e-05	CXCL10,NOS2,NR4A1,PTGS2	116 (19)
GIP		other		1.98	bias	8.09e-05	Ccl2,Ccl7,RGS2,SPP1	124 (19)
LAMA5	-0.015	other	Activated	2	bias	8.09e-05	Ccl2,Ccl7,CXCL10,CXCL3
NBEAL2	0.027	other	Inhibited	-2		8.09e-05	Ccl7,CXCL10,CXCL3,IRF8	112 (9)
JAK2	0.105	kinase	Activated	2.734	bias	8.34e-05	Ccl2,CCL5,CXCL10,ENPP2,ESR1,NOS2,PTGS2,SLAMF9,TAP1	115 (20)
NOS2	3.196	enzyme		1.253		8.4e-05	ACTC1,Ccl2,Ccl7,CXCL3,Cxcl9,ISG15,ITIH4,KDR,NFKBIA,NOS2,PTGS2	114 (16)
NOTCH1	0.062	transcription regulator		0.623		8.53e-05	ADAM19,CDCA7,Cdkn1c,DTX1,IRF8,ITGA6,LYVE1,NOS2,NR2F2,PROX1,PTGS2,SELE,SPP1	142 (20)
IRF4		transcription regulator	Inhibited	-2.077		8.8e-05	Acp5,B2M,Ccl2,CXCL10,CXCL3,IL33,IRF5,ISG15,PRKCQ,SPP1	138 (19)
PRKCD	-0.002	kinase	Activated	2.229		8.8e-05	Ccl2,CCL5,CX3CL1,CXCL10,IL2RG,LDLR,NFKBIA,NOS2,NR4A1,PTGS2,VCAM1	94 (17)
arachidonic acid		chemical - endogenous mammalian		1.448		8.85e-05	EPHB1,KDR,LDLR,NFKBIA,PTGS2,RGS2,UCP2,VCAM1	132 (19)
GPER1		G-protein coupled receptor	Activated	2.383	bias	9.01e-05	ESR1,NFKBIA,RASD1,RGS16,SFRP2,TNFAIP3	174 (23)
Sphk		group				9.42e-05	IL33,SELE,VCAM1	93 (17)
coconut oil		chemical drug				9.42e-05	CXCL3,NOS2,PTGS2	66 (7)
poly(dG-dC)		chemical reagent				9.42e-05	CXCL10,ISG15,RSAD2	89 (11)
RBCK1	0.064	transcription regulator				9.42e-05	ESR1,TNFAIP3,VCAM1
Ptgs2os2		other				9.42e-05	Ccl2,CCL5,CXCL10
MRC1		transmembrane receptor				9.42e-05	CCL5,CXCL10,NOS2	87 (9)
polyphosphate		chemical - endogenous mammalian				9.42e-05	SELE,SPP1,VCAM1	96 (14)
vinpocetine		chemical drug				9.42e-05	Ccl2,CXCL3,VCAM1	88 (9)
CYBB		enzyme		1.342	bias	9.42e-05	Ccl2,CCL5,CXCL10,CXCL3,KIT	107 (19)
CAMP		other		1.4		9.5e-05	Ccl2,CCL5,Ccl7,CXCL10,CXCL3,NOS2,PTGS2,TNFAIP3	110 (15)
TNFRSF1A	0.055	transmembrane receptor		1.737		9.77e-05	Ccl2,CCL5,CXCL10,CXCL3,KDR,LBP,NOS2,RGS7,SELE,VCAM1	109 (23)
cocaine		chemical drug		0.732	bias	0.000101	ADORA2A,Ccl2,DUSP14,EGR4,FHL2,GRIA1,MEST,NOS2,NR4A1,NTS,PPP1R1B	145 (19)
L-dopa		chemical - endogenous mammalian		-0.684		0.000102	ADORA2A,APBA2,C4A/C4B,CACNB2,Cdkn1c,DGKB,EDNRB,EGR4,FAM81A,GAS7,GDF10,GNG7,HLA-A,IGFBP5,IL18BP,IL4I1,MYO1B,NGEF,PPP1R1B,RELN,SLAMF9,SLC2A6,TTYH1
GLIS2	0.033	transcription regulator	Inhibited	-2	bias	0.000103	C3,Ccl2,CXCL10,LTBP2
SMURF1	0.177	enzyme		-1	bias	0.000103	CXCL10,Cxcl9,NOS2,NR4A1	106 (21)
PLA2G4A	0.025	enzyme		1.934	bias	0.000103	Ccl2,CX3CL1,NOS2,PTGS2	107 (16)
diethylmaleate		chemical toxicant		-1.982		0.000103	NFKBIA,NOS2,SELE,TNFAIP3	121 (15)
lisinopril		biologic drug		-0.762	bias	0.000103	Ccl2,KDR,LDLR,NOS2	85 (11)
peroxynitrite		chemical toxicant	Activated	2		0.000103	MARCKSL1,NOS2,PTGS2,RGS2	139 (20)
MARK2	0.15	kinase	Activated	2.236	bias	0.000109	Ccl7,CXCL3,HDC,PTGS2,RSAD2
PRKCE	-0.021	kinase	Activated	2.574	bias	0.000109	Cxcl9,IL2RG,LDLR,NOS2,PTGS2,RGS2,VCAM1	110 (20)
MAPK9	0.067	kinase	Activated	2.351		0.00012	Ccl2,CCL5,Ccl7,CYP1A1,HDC,HMGA1,MARCKSL1,NOS2,PTX3,TNFAIP3	132 (15)
CD3		complex	Activated	2.844	bias	0.000121	ACTG2,CCL5,CD2,CD274,CD74,CH25H,CXCL10,DUSP14,EPHB1,HLA-DQB1,IGFBP5,IGFBP6,IL2RG,IL4I1,IRF8,MMRN1,NFKBIA,NOS2,NR4A1,PTGS2,TFPI2,TNFAIP3	121 (19)
andrographolide		chemical drug		-1.109		0.000126	CYP1A1,NOS2,PTGS2,SELE,VCAM1	100 (20)
ATN1	-0.134	transcription regulator				0.000126	ATP1B2,GAS7,IGFBP5,LTBP2,MARCKSL1,NPTX1,RGS16,SOX4,SPP1
CEP-1347		chemical drug		-1.982		0.000129	Ccl2,CCL5,NOS2,PTGS2	129 (24)
PS-1145		chemical - kinase inhibitor	Inhibited	-2		0.000129	CCL5,NFKBIA,PTGS2,TNFAIP3	112 (14)
PTGS2	0.811	enzyme	Activated	2.863		0.000132	Ccl2,CCL5,CXCL10,CXCL3,GRIA1,ITGA6,KDR,NOS2,PTGS2,STC1	129 (18)
ID3	0.015	transcription regulator	Activated	2.138		0.000133	BCL3,CCL5,Cdkn1c,DTX1,EGR4,IRF5,IRF8,NR4A1,SELE,SOX4,VCAM1	96 (10)
KRAS	0.144	enzyme		0.095		0.000135	ANXA8/ANXA8L1,B2M,Ccl2,CD274,CD74,CDH3,CX3CL1,CXCL10,HMGA1,IL33,ISG15,NFKBIA,NGEF,NOS2,NR4A1,PDPN,PTGS2,SPP1,TAP1,UPP1	128 (15)
IFNA1/IFNA13		cytokine		1.103	bias	0.000137	CXCL10,CYP1A1,ISG15,PTGS2,RSAD2,ZBP1	94 (16)
EBI3		cytokine	Activated	2.449		0.000137	B2M,CD274,HLA-A,HLA-DMA,HLA-DQA1,TAP1	125 (19)
GATA4	-0.288	transcription regulator		0.2		0.000145	ACTC1,ACTG2,EPHB1,FAP,IRF8,LTBP2,Pln,PTGS2,SCN5A,SPP1,VCAM1
Cyp4a14		enzyme				0.000149	Ccl2,CXCL10,CXCL3
PPT1	-0.073	enzyme				0.000149	Ccl2,CXCL10,CXCL3
STC1	1.47	kinase				0.000149	CXCL3,STC1,UCP2
CD5L		transmembrane receptor				0.000149	Ccl2,CCL5,Ccl7	67 (6)
CLTC	0.224	other				0.000149	CD74,HLA-A,KDR	78 (7)
NCX-4040		chemical drug				0.000149	CYP1A1,NOS2,PTGS2	155 (20)
IRF5	1.366	transcription regulator	Activated	2.579	bias	0.000151	CCL21,CCL5,CXCL10,IFI44,IRF5,ISG15,RSAD2	91 (18)
PTK2	0.293	kinase		0		0.000151	Ccl2,CSPG4,DSP,LDLR,SPP1,VCAM1	132 (22)
VIP		other		-1.384		0.000152	Ccl2,CCL5,CD274,CXCL10,CXCL3,NFKBIA,NOS2,PTGS2	112 (16)
GLI2	0.26	transcription regulator		0		0.000152	CCL5,CXCL10,CXCL3,HHIP,HK2,KLK3,MEOX1,SPP1	122 (12)
androgen		chemical drug		-0.557		0.000153	C4A/C4B,IGFBP5,KLK3,NFKBIA,NR4A1,PTGS2,SFRP2,SOX4,VAV3,WIF1	134 (19)
RNA polymerase II		complex				0.000155	Acp5,ACTC1,B2M,CCL5,CYP1A1,ESR1,HLA-DQA1,LDLR,NFKBIA,NOS2,PTGS2,SPP1,TAP1	133 (13)
2,4-dinitrofluorobenzene		chemical toxicant				0.000159	Ccl2,CXCL10,Cxcl9,NOS2	139 (14)
S-(2,3-bispalmitoyloxypropyl)-cysteine-GDPKHPKSF		chemical reagent		1.982	bias	0.000159	Apol11b (includes others),CCL5,CXCL10,PTGS2	100 (16)
chitin		chemical - endogenous non-mammalian		1.951	bias	0.000159	Ccl2,CCL5,CD274,IL33
SAA		group		1.963	bias	0.000165	Ccl2,IL33,NOS2,PTGS2,VCAM1	111 (19)
TANK	0.181	other		0		0.000165	Ccl7,CXCL3,Cxcl9,NOS2,PTGS2	98 (14)
ADORA2B		G-protein coupled receptor		0		0.000165	Ccl2,CXCL3,NOS2,PDE5A,SPP1	108 (17)
IRF8	1.393	transcription regulator		1.18		0.000176	B2M,CCL5,CD74,CFB,Cxcl9,IRF5,IRF8,ISG15,NOS2	107 (13)
aldosterone		chemical - endogenous mammalian	Activated	2.044	bias	0.000176	Ccl2,KDR,NDRG2,NFKBIA,PGF,PTGS2,RGS2,SPP1,VCAM1	127 (20)
hydrocortisone		chemical - endogenous mammalian		0.547		0.000185	IGFBP5,IGFBP6,KLK3,NFKBIA,PROX1,PTGS2,SELE,TNFAIP3,TP53I11	139 (18)
VDR	0.024	transcription regulator		-1.01		0.000185	Ccl2,CXCL10,HK2,LDLR,NOD2,PTGS2,SELE,SPP1,UCP2	137 (24)
gefitinib		chemical drug		-0.124		0.000186	C3,Ccl2,CD274,FSCN1,IGFBP5,IL7,KIT,NRP2,PCDH12,PTGS2	147 (24)
DLL4	0.287	other		-0.44		0.000188	DTX1,KDR,LYVE1,NOS2,NR2F2	44 (6)
NQO1	0.154	enzyme		0.447		0.000188	CCL5,KIT,NOS2,PTGS2,VCAM1	103 (20)
DACH1	0.768	transcription regulator	Inhibited	-2		0.000188	CXCL3,KLK3,PTGS2,RELN,TNFAIP3
tempol		chemical drug	Inhibited	-2.213		0.000188	NOS2,PTGS2,SPP1,UCP2,VCAM1	114 (22)
WDR5	0.122	transcription regulator				0.000195	ESR1,KLK3,SFRP2,SPP1	66 (7)
ACKR1		G-protein coupled receptor				0.000195	SELE,TNFAIP3,UBD,VCAM1
CXCR2		G-protein coupled receptor		-0.218		0.000195	Ccl2,CXCL10,CXCL3,NOS2	112 (21)
CYP2J2	0.121	enzyme		-1.322		0.000195	Ccl2,NFKBIA,SELE,VCAM1	96 (13)
ADORA3		G-protein coupled receptor		1	bias	0.000195	CCL5,CXCL3,NOS2,SPP1	126 (21)
Pka		complex	Activated	2.357		0.000195	CXCL10,LDLR,MEST,NOS2,NR4A1,NTS,PPP1R1B,PTGS2,RGS2	107 (17)
ADRB		group		0.686		0.000195	ADAMTS4,BOK,Ccl2,CXCL10,NFKBIA,NOS2,NR4A1,PTGS2,RSAD2	93 (18)
2-amino-5-phosphonovaleric acid		chemical - other		-0.469		0.000195	ADAM19,BVES,KDR,NR4A1,PTGS2,RALGPS2,RGS2,TNFAIP3,TSPAN18	38 (4)
ADRM1	-0.005	other				0.0002	NFKBIA,NOS2	91 (7)
neuropeptide Y		biologic drug				0.0002	NOS2,UCP2
DCTN4	-0.135	other				0.0002	CCL5,CXCL10
poly-L-glutamic acid-peptoid 1 conjugate QM56		chemical reagent				0.0002	Ccl2,CCL5	110 (11)
14,15-epoxyeicosa-5(Z)-enoic acid		chemical reagent				0.0002	Ccl2,SELE
Sf1	0.036	other				0.0002	Ccl2,VCAM1
SC68376		chemical - kinase inhibitor				0.0002	NOS2,PTGS2	81 (12)
benzylamine		chemical - endogenous mammalian				0.0002	NOS2,PTGS2	79 (7)
poly(ADP-ribose)		chemical - endogenous mammalian				0.0002	NOS2,PTGS2	105 (12)
lipooligosaccharide		chemical toxicant				0.0002	NOS2,PTGS2	111 (17)
testosterone		chemical - endogenous mammalian		0.339		0.0002	ABCC9,BCL3,ESR1,FST,GRIA1,HDC,IGFBP5,KLK3,Mx2,NFKBIA,NOS2,PDE5A,PTGS2,TUBB3,VCAM1	153 (24)
diphenyleneiodonium		chemical reagent		-1.709	bias	0.000202	Ccl2,CXCL3,PDE5A,PTGS2,SELE,UCP2	127 (20)
Z-LLL-CHO		chemical - protease inhibitor		-1.315		0.00021	Ccl2,CCL5,Cdkn1c,CFB,CXCL10,Cxcl9,CYP1A1,ESR1,KLK3,NFKBIA,NOS2,PTGS2,RGS7,VCAM1	109 (20)
MEOX2	1.048	transcription regulator	Inhibited	-2.191	bias	0.000213	CXCL3,PTX3,SELE,TNFAIP3,VCAM1	78 (7)
FEV		transcription regulator		0.378	bias	0.000219	EPHA7,NFIX,NR2F2,NTS,PROX1,TRPV2,VCAM1
homocysteine		chemical - endogenous mammalian		1.969		0.000219	Ccl2,CCL5,CXCL10,Cxcl15,PGF,PTGS2,VCAM1	108 (21)
SRC	0.079	kinase		0.889		0.000221	CXCL10,CYP1A1,KLK3,LDLR,PTGS2,SPP1,TFPI2,VCAM1	121 (17)
ganglioside		chemical - endogenous mammalian				0.000221	Ccl2,NOS2,PTGS2	146 (22)
2',3'-dialdehyde ATP		chemical reagent				0.000221	CXCL10,NOS2,PTGS2	126 (21)
triciribine		chemical drug				0.000221	Ccl2,CIDEA,CXCL3
tannic acid		chemical toxicant				0.000221	CFB,NOS2,PTGS2	115 (13)
Agtr1b		G-protein coupled receptor				0.000221	NOS2,PTGS2,VCAM1	150 (23)
NEK7	0.164	kinase				0.000221	CXCL10,ISG15,PTGS2	87 (7)
Ferritin		complex				0.000221	CCL5,NFKBIA,NOS2	78 (7)
AZD8055		chemical drug				0.000221	CCL5,CXCL10,Cxcl9
PTGDR		G-protein coupled receptor				0.000221	Ccl2,NOS2,PTGS2	108 (13)
HA900		chemical reagent				0.000221	CCL5,CXCL3,PTN
flufenamic acid		chemical drug				0.000221	KLK3,PTGS2,VCAM1	76 (10)
PD 168393		chemical - kinase inhibitor				0.000221	CCL5,CXCL10,RGS16	80 (7)
ketorolac		chemical drug				0.000221	Ccl2,NFKBIA,PTGS2	107 (14)
hexamethoxyflavone		chemical toxicant				0.000221	NOS2,PTGS2,VCAM1	96 (13)
arachidonyltrifluoromethane		chemical reagent				0.000221	CXCL3,NOS2,PTGS2	117 (20)
BCL6	-0.467	transcription regulator		-1.755		0.00023	BCL3,Ccl2,Ccl7,CD2,CXCL10,CXCL3,FMOD,HAPLN1,IRF8,LDLR,NOS2	119 (20)
Tnf receptor		group		1.067		0.000235	C3,NOS2,SELE,UBD	115 (18)
IKK (complex)		complex		1.177		0.000235	CCL5,CXCL10,PTGS2,VCAM1	120 (13)
OXT		other				0.000235	ACTC1,ESR1,PTGS2,RGS2	148 (21)
PLA2G6	-0.061	enzyme		1.109		0.000235	Ccl2,NOS2,PTGS2,RGS2	103 (22)
PLAUR	0.174	transmembrane receptor		1.941		0.000241	Ccl2,CCL5,CXCL3,ITGA6,KDR	102 (16)
RHO		G-protein coupled receptor		-1.633		0.000242	B2M,CACNB2,CD74,HK2,SERPING1,TNFAIP3
methylprednisolone		chemical drug		-0.961		0.000243	ABCC9,AK4,B2M,Ccl2,CD74,CDH3,CIDEA,CXCL3,EDNRB,ENPP2,IRGM,ITGA7,LDLR,LYVE1,Mx2,MYO1B,NGEF,RGS2,VCAM1	121 (16)
BTK		kinase		-0.378		0.000249	CD2,CD274,CXCL10,CXCL3,ENPEP,IL4I1,ISG15,SPN	118 (16)
simvastatin		chemical drug		-0.013		0.00025	CXCL3,ESR1,KIT,LDLR,NFIX,NFKBIA,NOS2,PTGS2,SELE,SPP1,VCAM1	120 (19)
FGF2		growth factor		1.437		0.000253	Ccl2,EDNRB,EGLN3,ENPP2,GRIA1,IGFBP5,KDR,LYVE1,NOS2,NR4A1,PGF,PTGS2,SELE,SPP1,TUBB3,VCAM1	141 (23)
AR		ligand-dependent nuclear receptor		-0.1	bias	0.00026	C3,C4A/C4B,Cdkn1c,EDNRB,FAM84A,IGFBP5,ITGA6,KLK3,LMOD1,MYO1B,MYOM1,MYOZ2,Pln,SCN5A,SLC45A3,SPP1,TUBB3,ZBP1
estrogen		chemical drug	Activated	2.768	bias	0.000261	BCL3,ESR1,GRIA1,IGFBP5,IGFBP6,KDR,LDLR,NR4A1,NTS,PTGS2,PTX3,S1PR1,SPP1	143 (16)
maneb		chemical toxicant		0.896		0.000264	CCL21,CYP1A1,EGR4,NOS2,NR4A1,STON2
Histone h4		group				0.000266	CCL5,CXCL10,CXCL3,ESR1,PTGS2,SELE,SPP1,TBX2,VCAM1	123 (14)
GSK2816126		chemical drug		-1.486	bias	0.000271	Ccl2,CXCL10,NOS2,SPP1,WIF1	62 (5)
nonylphenol		chemical toxicant		1.342	bias	0.000271	CXCL10,ESR1,LBP,PFKFB4,PTGS2	87 (12)
potassium chloride		chemical drug				0.000271	Ccl2,CIDEA,IGFBP5,NPTX1,NR4A1,PTGS2,SPP1	130 (20)
LEP		growth factor		1.505		0.000273	BOK,Ccl2,CCL5,CIDEA,CXCL10,ESR1,GRIA1,LDLR,NOS2,NPPC,NTS,Pln,PTGS2,SELE,SPP1,UCP2,VCAM1	97 (19)
PDGF BB		complex	Activated	3.658	bias	0.000279	BCL3,C3,Ccl2,Ccl7,EDNRB,FHL2,LBP,LDLR,NOS2,NR4A1,PTGS2,RGS2,TNFAIP3,VCAM1	106 (18)
mir-155		microRNA		-1.582		0.00028	CCL5,CXCL10,HK2,IL7,IRF8,NOS2,PTGS2,S1PR1	123 (22)
2-aminopurine		chemical reagent		-1.948	bias	0.000282	CXCL10,ISG15,NOS2,PTGS2	130 (20)
PDGF-DD		complex	Activated	2		0.000282	Ccl2,Ccl7,KDR,PGF	72 (7)
CYP7A1		enzyme		-1.192		0.000282	Ccl2,LDLR,NOS2,PTGS2	127 (19)
epicatechin gallate		chemical drug				0.000282	NOS2,PTGS2,TP53I11,VCAM1	96 (21)
ilomastat		chemical drug		-0.083		0.000282	Ccl2,CCL5,CXCL10,CXCL3	100 (20)
acetaminophen		chemical drug	Activated	2.389		0.000292	AK4,Ccl2,CXCL10,CXCL3,Cxcl9,KDR,NDRG2,NOS2,PTGS2,VCAM1	127 (20)
BCL3	0.671	transcription regulator	Inhibited	-2.224		0.000304	CCL5,CXCL10,CXCL3,Cxcl9,HLA-DQB1	107 (10)
CCR5		G-protein coupled receptor		1.571		0.000304	Ccl2,CCL5,CXCL10,CXCL3,NOS2	100 (18)
B4GALT6	-0.124	enzyme				0.000313	CCL5,NOS2,PTGS2	62 (7)
KCNN4	0.108	ion channel				0.000313	Acp5,CCL5,CX3CL1
AMBP		transporter				0.000313	Ccl2,CXCL3,ITIH5	124 (19)
NFKBIE	0.824	transcription regulator				0.000313	CXCL3,SELE,VCAM1	85 (9)
zileuton		chemical drug				0.000313	Ccl2,CCL5,PTGS2	97 (11)
mastoparan		chemical toxicant				0.000313	CXCL10,NOS2,SELE	119 (20)
MECP2	-0.141	transcription regulator		-1.067		0.000313	ESR1,GRIA1,NR4A1,PTGS2,RELN,SCN3A,SPN,TFPI2	91 (9)
ursodeoxycholic acid		chemical - endogenous mammalian		-0.186		0.000313	Ccl2,CXCL10,CYP1A1,NOS2,PTGS2,SPP1	134 (20)
PRKCA	-0.062	kinase	Activated	2.178		0.000331	CXCL10,CXCL3,DTX1,NFKBIA,NOS2,PTGS2,RSAD2,VCAM1	109 (17)
deoxycorticosterone acetate		chemical drug		1.036		0.000334	PTGS2,SELE,SPP1,VCAM1	107 (8)
mir-221		microRNA		0.082		0.000334	Cdkn1c,KDR,KIT,KLK3
JAK		group	Activated	2	bias	0.00034	CXCL10,IL33,ISG15,PTGS2,RSAD2	94 (13)
ACVR1	0.162	kinase				0.00034	HHIP,Ifi27l2a/Ifi27l2b,IL33,SELE,VCAM1	16 (4)
baicalein		chemical drug		-1.206	bias	0.00034	CYP1A1,KDR,NOS2,PTGS2,VCAM1	151 (25)
isoproterenol		chemical drug		1.4	bias	0.000341	APLNR,BVES,CYP1A1,NOS2,NR4A1,Pln,PTGS2,TUBB3,UCP2	88 (18)
daidzein		chemical drug		0.174		0.000356	CYP1A1,ESR1,HLA-A,HLA-DQA1,LDLR,MMRN1,PTGS2	152 (23)
nicotine		chemical drug		-0.797		0.000362	Ccl2,CXCL3,GRIA1,KDR,LDLR,NOS2,PTGS2,SELE,SPP1,TFPI2	119 (19)
sodium chloride		chemical - endogenous mammalian		1.413	bias	0.00037	APLNR,Ccl2,CCL5,NOS2,PTGS2,SPP1	123 (21)
17-alpha-ethinylestradiol		chemical drug		-1.299		0.000375	BCL3,C3,Ccl2,CCL5,CD74,CXCL10,CXCL3,LDLR,VCAM1	145 (19)
ZNF106	0.005	other	Inhibited	-2.236		0.00038	ACTC1,C3,C4A/C4B,CXCL10,Ifi27l2a/Ifi27l2b
U73122		chemical reagent	Inhibited	-2.2	bias	0.00038	NOS2,NR4A1,PTGS2,SELE,VCAM1	135 (19)
miR-146a-5p (and other miRNAs w/seed GAGAACU)		mature microRNA		-1.967	bias	0.00038	CXCL3,IRF5,LBP,NFIX,NFKBIA,NOS2,PLEKHA4	111 (18)
HDAC3	-0.076	transcription regulator		-0.762		0.00038	CXCL10,ENPP2,KLK3,NFKBIA,PTGS2,SPP1,TBX2	125 (19)
2-(4-acetoxyphenyl)-2-chloro-N-methylethylamine		chemical reagent		-1.982	bias	0.000393	CCL5,CXCL10,NOS2,SELE	132 (15)
CXCL10	1.798	cytokine				0.000393	Ccl2,CCL5,CXCL10,Cxcl9	147 (22)
HSPD1	-0.082	enzyme		1.98	bias	0.000393	Ccl2,CXCL3,SELE,VCAM1	100 (19)
PCYT1A	-0.001	enzyme		1	bias	0.000393	Ccl2,EPHA7,FST,TUBB3	54 (7)
kaempferol		chemical toxicant		-1.387	bias	0.000393	CYP1A1,NOS2,PTGS2,SELE	142 (21)
N-acetyl-L-cysteine		chemical drug	Inhibited	-3.086		0.000398	C3,Ccl2,CCL5,CXCL10,CXCL3,HDC,NOS2,PTGS2,SELE,SPP1,VCAM1	111 (20)
PLAU		peptidase		1.446		0.000401	Ccl2,CCL5,CXCL3,HLA-DMA,KDR,PTN	128 (19)
TAF4		transcription regulator				0.000405	CDH3,FMOD,ITGA6,PTN,SFRP2,SPP1,VAV3
5-azacytidine		chemical drug	Activated	2.241	bias	0.000412	ESR1,HK2,IRF8,KDR,MYO1B,NOS2,PTGS2,TFPI2,UPP1	131 (20)
lipid A		chemical toxicant	Activated	2.219	bias	0.000422	C3,Ccl2,CCL5,CXCL10,CXCL3	100 (17)
IFNGR1	0.008	transmembrane receptor		1.4	bias	0.000422	Ccl2,CCL5,CXCL10,CXCL3,Cxcl9	106 (20)
KDR	0.823	kinase		1.387	bias	0.000422	Ccl2,KDR,NR4A1,PTGS2,SELE	152 (21)
Ro31-8220		chemical - kinase inhibitor		-1.412	bias	0.000422	KLK3,NOS2,PRKCQ,PTGS2,VCAM1	133 (17)
VSIR		other				0.000426	Ccl2,CXCL10,Cxcl9	74 (7)
ABCA4		transporter				0.000426	C3,CFB,CXCL10
Traj18		other				0.000426	Ccl2,CCL5,CXCL3	92 (13)
VEGFC	0.024	growth factor				0.000426	KDR,PROX1,PTGS2	81 (7)
TNNI3		transporter				0.000426	Ccl2,CCL5,CXCL3
enterolactone		chemical - endogenous mammalian				0.000426	ESR1,KDR,SPP1	87 (7)
INHBA	0.629	growth factor		1.372		0.000428	DACH1,DTNA,EGLN3,ESR1,F13A1,FST,PCSK6,RGS16,SOX4,VAV3	108 (9)
ID2	-0.368	transcription regulator		1.89		0.000428	BCL3,CCL5,Cdkn1c,DTX1,EGR4,IRF5,IRF8,NR4A1,SOX4,VCAM1
SOX9		transcription regulator		0.896		0.000434	GAS7,GDF10,HAPLN1,KIT,KLK3,LBP
lipoteichoic acid		chemical - endogenous non-mammalian	Activated	2.382	bias	0.000434	Ccl2,CXCL10,NOD2,NOS2,NR4A1,PTGS2	92 (16)
Sb202190		chemical - kinase inhibitor		-1.402	bias	0.000435	Ccl2,CXCL10,CYP1A1,HAPLN1,LDLR,NOS2,PTGS2,VCAM1	112 (22)
GATA2	0.036	transcription regulator		0.847		0.000444	CCL21,CCL5,CXCL10,F13A1,HDC,KDR,KHDRBS3,KIT,KLK3,MMRN1,PLB1,PRG2,SAMD5,SPN,VCAM1
bleomycin		chemical drug	Activated	2.466	bias	0.000445	C3,Ccl2,CCL5,CXCL10,FAP,LTBP2,NOS2,NR4A1,SFRP2,SPP1	128 (17)
MST1		growth factor		-1.934		0.00046	IRF8,PTGS2,SOX4,SPP1	124 (23)
PLK2	0.482	kinase		1	bias	0.00046	Ccl7,CXCL10,Cxcl9,Mx2
RORA	-0.197	ligand-dependent nuclear receptor		0.751		0.000464	Ccl2,CCL5,CH25H,CXCL10,Cxcl9,GSTM2,KCNK5,NFKBIA,PTGS2,UCP2	110 (15)
Hsp27		group		1.091		0.000468	CD274,KLK3,NOS2,PPP1R1B,PTGS2	127 (19)
VitaminD3-VDR-RXR		complex		0.555	bias	0.000468	CCL5,CXCL10,IGFBP5,IGFBP6,SPP1
SQSTM1	0.063	transcription regulator		1.153		0.000468	Ccl7,EGLN3,NFKBIA,NOS2,RSAD2	88 (8)
ITGB2		transmembrane receptor		-0.762		0.000468	Ccl2,CXCL10,CXCL3,PTGS2,VCAM1	131 (22)
ABCA1	0.176	transporter		-1.81		0.000468	Ccl2,CXCL3,LDLR,NOS2,PTGS2	110 (20)
Foxp1	-0.088	transcription regulator				0.000468	Cdkn1c,NGEF,PDPN,RASD1,SOX4
Pam3-Cys		chemical toxicant	Activated	2.195	bias	0.000468	CCL5,CXCL10,CXCL3,NOS2,SELE	95 (18)
SB 216763		chemical toxicant		1.446	bias	0.000468	FSCN1,NOS2,NR4A1,PTGS2,RGS2	99 (15)
stallimycin		biologic drug		1	bias	0.000468	CXCL10,IFI44,IL7,ISG15,NOS2	110 (14)
10E,12Z-octadecadienoic acid		chemical - endogenous mammalian	Activated	2.051		0.000469	BOK,Ccl2,LDLR,NR4A1,PTGS2,UCP2	84 (17)
medroxyprogesterone acetate		chemical drug		-0.707		0.000484	Ccl2,CCL5,CXCL10,CYP1A1,ESR1,FMOD,NCAPG,TFPI2	157 (22)
CEBPD	0.277	transcription regulator	Activated	2.396		0.000489	C3,Ccl2,CXCL3,CYP1A1,IGFBP5,NOS2,PTGS2	121 (16)
bisphenol A		chemical - endogenous mammalian	Activated	2.372		0.000494	C3,CXCL10,ESR1,KDR,KIT,LBP,NR4A1,PFKFB4,PTGS2	155 (20)
MAP2K3	0.037	kinase		1.179	bias	0.000506	CXCL10,ISG15,NOS2,Pln,PTGS2,RGS7	118 (20)
EGLN		group	Inhibited	-2.343	bias	0.000517	AK4,Apol11b (includes others),Ccl2,EGLN3,HK2,HLA-DQB1,NTS,Serpina3g (includes others),STC1
C3AR1		G-protein coupled receptor		-0.728		0.000518	C3,Ccl2,CCL5,CXCL10,LTBP2	130 (17)
lysophosphatidic acid		chemical - other	Activated	2.58	bias	0.00052	Ccl2,CCL5,CXCL10,CXCL3,KDR,PTGS2,VCAM1	133 (19)
TGFBR2	0.414	kinase		1.414		0.000523	ATP1A2,Ccl2,Ccl7,FMOD,FST,KDR,NOS2,PDPN,PTGS2,SPP1	105 (17)
UTP		chemical - endogenous mammalian		1.954		0.000534	Ccl2,NOS2,SPP1,VCAM1	111 (21)
CCR1		G-protein coupled receptor		1.109		0.000534	Acp5,Ccl2,CCL5,SPP1	130 (20)
PLK4	-0.014	kinase		1	bias	0.000534	Ccl7,CXCL10,Cxcl9,Mx2
PTHLH	0.643	other				0.000546	Ccl2,Cdkn1c,HAPLN1,ITGA6,PTGS2,RGS2	78 (12)
bortezomib		chemical drug		-1.503		0.000552	Ccl2,CCL5,CXCL10,Cxcl9,ESR1,IL33,KIT,NOS2,PTGS2,RSAD2,VCAM1	107 (20)
SLC7A2	0.135	transporter				0.000562	CXCL10,CXCL3,Cxcl9
CST3	-0.124	other				0.000562	Acp5,IRF8,NFKBIA
PSMB8	0.498	peptidase				0.000562	NFKBIA,NOS2,TNFAIP3	96 (9)
edaravone		chemical drug				0.000562	Ccl2,CXCL3,PTGS2	116 (19)
KT5720		chemical - kinase inhibitor				0.000562	ADORA2A,NFKBIA,NOS2
RAS		group	Activated	2.172	bias	0.000564	CD274,CXCL10,HMGA1,LDLR,NOS2,PTGS2,TFPI2,UPP1	121 (19)
valsartan		chemical drug		-1.458	bias	0.000572	Ccl2,KIT,NOS2,PTGS2,SPP1	122 (21)
AGER	0.318	transmembrane receptor		1.889		0.000588	Ccl2,CXCL3,PTGS2,SELE,TUBB3,VCAM1	82 (17)
TO-901317		chemical reagent		-0.015		0.000592	Acp5,C3,Ccl2,CIDEA,HK2,ITGA6,ITIH4,LDLR,NFKBIA,NOS2,PTGS2	86 (14)
cardamomin		chemical - endogenous non-mammalian				0.000593	NOS2,PTGS2	80 (13)
imperatorin		chemical - endogenous non-mammalian				0.000593	NOS2,PTGS2	117 (12)
NCF2	0.611	enzyme				0.000593	SELE,VCAM1
pinoresinol		chemical - endogenous non-mammalian				0.000593	NOS2,PTGS2	64 (7)
MPO		enzyme				0.000593	EDNRB,NOS2	66 (7)
ERC1	-0.125	other				0.000593	NFKBIA,PTGS2	68 (7)
TIGAR		enzyme				0.000593	Ccl2,TNFAIP3	72 (9)
C20-D3-vitamin A		chemical drug				0.000593	C3,CFB
maraviroc		chemical drug				0.000593	Ccl2,CXCL10	37 (3)
ethyl gallate		chemical - endogenous non-mammalian				0.000593	SELE,VCAM1
pirinixic acid		chemical toxicant		-0.793	bias	0.000607	C3,Ccl2,CCL5,CIDEA,CXCL3,CYP1A1,HLA-DQA1,IRF8,KDR,LDLR,MEST,NFKBIA,NOS2,PTGS2,UCP2,VCAM1	104 (18)
ADA	-0.29	enzyme				0.000616	Ccl2,CXCL3,PDE5A,SPP1
CD47	0.028	transmembrane receptor		0.749		0.000616	Acp5,IL7,KDR,NOS2	113 (11)
THBS4		other	Activated	2		0.000616	Ccl2,CXCL10,SELE,VCAM1
nitrofurantoin		chemical drug		0.426		0.000617	C3,C4A/C4B,CXCL10,CXCL3,ITIH4,LBP,NFKBIA,SPP1,VCAM1
INSIG1	0.142	other	Inhibited	-2.414	bias	0.000623	CCL5,CXCL10,CXCL3,HLA-DQA1,IRF8,LDLR,UCP2	86 (12)
LRP1	-0.176	transmembrane receptor		-1.279		0.000629	Ccl2,GRIA1,NOS2,PTGS2,SERPING1	107 (16)
Hdac		group		0.644		0.000644	CX3CL1,EDNRB,MEOX1,NR4A1,PGF,SFRP2,SPP1,WIF1,WNT9B
tamoxifen		chemical drug		0.66		0.000645	C3,ESR1,F13A1,FHL2,KLK3,LDLR,LTBP2,NOS2,PTGS2,SELE,SPP1,UCP2	133 (18)
Creb		group	Activated	2.888		0.000646	ANK3,APBA2,CXCL10,EGR4,FSCN1,LDLR,NR4A1,NTS,PFKFB4,PTGS2,RGS2,SOX4,ZBP1	75 (7)
SMAD4	0.214	transcription regulator		1.252		0.000657	Ccl2,CDH3,FAP,FSCN1,FST,ITGA6,NFKBIA,NPPC,PTGS2,PTX3,SELE	139 (14)
RELB	0.438	transcription regulator				0.000679	B2M,ESR1,MARCKSL1,NFKBIA,NOS2,PTGS2	105 (14)
nifedipine		chemical drug		-1.432		0.000679	IGFBP5,LDLR,NOS2,NR4A1,PTGS2,VCAM1	118 (21)
caffeic acid phenethyl ester		chemical drug	Inhibited	-2.6	bias	0.000699	CXCL10,ESR1,IGFBP6,NFKBIA,NOS2,PTGS2,VCAM1	141 (21)
taurocholic acid		chemical - endogenous mammalian		1.154		0.000707	Ccl2,KDR,NOS2,PTGS2	124 (22)
miR-221-3p (and other miRNAs w/seed GCUACAU)		mature microRNA		0.042	bias	0.000707	Cdkn1c,ESR1,KIT,KLK3
CHADL	-0.083	other	Inhibited	-2		0.000707	Ccl2,CSPG4,PTX3,VCAM1
HOXB13		transcription regulator		0		0.000707	EPHA7,KLK3,NFKBIA,SEMA3A
B2M	0.676	transmembrane receptor	Activated	2		0.000707	HLA-A,HLA-DQA1,HLA-DQB1,HLA-DRB5
FCGR2A		transmembrane receptor		1.972	bias	0.000707	Ccl2,CCL5,CXCL3,PTGS2	117 (20)
LTB4R		G-protein coupled receptor	Activated	2	bias	0.000707	Ccl2,CXCL3,LDLR,PTGS2	119 (24)
PD 123319		chemical drug		-0.293		0.000707	Ccl2,KDR,PTGS2,SPP1	114 (21)
2'3'-cyclic guanosine monophosphate-adenosine monophosphate		chemical - endogenous mammalian				0.000723	CXCL10,ISG15,RSAD2	102 (16)
1,2-dimethylhydrazine		chemical toxicant				0.000723	NOS2,NR4A1,PTGS2	85 (13)
N,N-dimethylsphingosine		chemical reagent				0.000723	PTGS2,SELE,VCAM1	103 (20)
auranofin		chemical drug				0.000723	C3,NOS2,PTGS2	131 (18)
IL6R	0.109	transmembrane receptor		1.132	bias	0.000729	CCL5,CXCL10,CXCL3,IGFBP5,PTGS2,VCAM1	100 (17)
EZH2	0.238	transcription regulator		1.723		0.000736	C3,Ccl2,CCL5,CX3CL1,CXCL10,Ifi27l2a/Ifi27l2b,KLK3,NFKBIA,PRG2,PTGS2,PTN,SFRP2,UBD,WIF1	126 (20)
PTGER2		G-protein coupled receptor	Activated	2.646	bias	0.00074	HDC,MASTL,NFKBID,NOS2,PTGS2,SPP1,STIL	119 (20)
cyclosporin A		biologic drug		-0.457		0.000753	ADORA2A,C4A/C4B,CCL5,EDNRB,FST,KDR,LDLR,LYVE1,NFKBIA,NOS2,NR4A1,PTGS2,SELE,SPP1,UPP1,VCAM1	117 (19)
NOG	-0.453	growth factor		-1		0.000758	CD2,FST,KDR,PTGS2,SPP1	79 (7)
ITGB1	0.06	transmembrane receptor		0.522		0.000758	ADAM19,ADAMTSL1,BCAN,ITGA7,NOS2,PTGS2,RELN,TNFAIP3	131 (13)
raloxifene		chemical drug		1.134		0.000763	BCL3,CCL5,ENPP2,ESR1,LDLR,MYO1B,PTGS2,SPP1,STC1	139 (21)
docosahexaenoic acid		chemical drug		-0.91		0.000763	Ccl2,GDF10,LDLR,NOS2,PDE5A,PTGS2,SELE,UCP2,VCAM1	110 (18)
CCL5	2.839	cytokine	Activated	2.386	bias	0.000781	Ccl2,CCL5,CXCL3,HDC,HMGA1,NOS2	121 (19)
anakinra		biologic drug	Inhibited	-2		0.000806	NOS2,PTGS2,SELE,VCAM1	111 (16)
urethane		chemical toxicant				0.000806	Cdkn1c,CYP1A1,KDR,PTGS2	93 (7)
eplerenone		chemical drug		-1.95	bias	0.000806	Ccl2,PTGS2,SPP1,VCAM1	123 (15)
enalapril		biologic drug		-0.447		0.000829	C4A/C4B,KDR,SPP1,UCP2,VCAM1
SMAD3	-0.024	transcription regulator		0.691		0.000833	C3,Ccl2,CXCL10,CXCL3,ESR1,FST,KLK3,NOS2,PTGS2,S1PR1,SPP1	124 (19)
rottlerin		chemical toxicant	Inhibited	-2.34	bias	0.000836	Ccl2,CXCL3,NOS2,PTGS2,RGS2,VCAM1	102 (20)
triamcinolone acetonide		chemical drug		0		0.000857	DNA2,LDLR,NFKBIA,NOS2,PLXNC1,RGS16,RGS2,SFRP2,SOX4,SPP1	84 (9)
SFTPA1		transporter		-1.154		0.000894	Ccl2,CXCL10,CXCL3,NOS2,RASD1,SFRP2	92 (17)
NFKB2	0.496	transcription regulator		-0.372	bias	0.000894	CCL5,HLA-DQA1,KLK3,MARCKSL1,PTGS2,VCAM1	115 (20)
CDK9	-0.028	kinase				0.000904	CCL5,HLA-DQA1,NFKBIA,SELE,TNFAIP3	134 (16)
PTPRJ	-0.172	phosphatase	Activated	2.236	bias	0.000904	Ccl7,CXCL3,HDC,Mx2,PTGS2	119 (9)
PTPN1	0.13	phosphatase		0.152		0.000904	Ccl7,CIDEA,CXCL3,NFKBIA,NOS2	109 (17)
azoxymethane		chemical toxicant		1.93	bias	0.000904	CXCL10,CXCL3,Cxcl9,NOS2,PTGS2	128 (21)
IFNA10		cytokine				0.00091	CXCL10,ISG15,ZBP1	75 (8)
IFNA21		cytokine				0.00091	CXCL10,ISG15,ZBP1	75 (8)
IFNA5		cytokine				0.00091	CXCL10,ISG15,ZBP1	75 (8)
PSMB10	0.221	peptidase				0.00091	NFKBIA,NOS2,TNFAIP3	65 (7)
IFNA7		cytokine				0.00091	CXCL10,ISG15,ZBP1	75 (8)
ZBP1	1.897	other				0.00091	CXCL10,ISG15,NFKBIA	89 (12)
TNFRSF11B	-0.157	transmembrane receptor				0.00091	Ccl2,NOS2,SPP1	108 (20)
PLCE1	-0.136	enzyme				0.00091	Ccl2,CXCL3,PTGS2	118 (19)
PTPRE	0.45	phosphatase				0.00091	Ccl7,CXCL3,Cxcl9
IFNA14		cytokine				0.00091	CXCL10,ISG15,ZBP1	75 (8)
IFNA6		cytokine				0.00091	CXCL10,ISG15,ZBP1	75 (8)
DMH1		chemical reagent				0.00091	CCL5,NOS2,PTGS2
dimethyl fumarate		chemical drug				0.00091	KDR,PTGS2,SELE	88 (12)
prostaglandin		chemical drug				0.00091	HAPLN1,NOS2,PTGS2	80 (7)
E64d		chemical - protease inhibitor				0.00091	C3,CD74,HLA-DMA
SOX10		transcription regulator				0.000916	EDNRB,GAS7,ITGA6,PTN
IDR-1002		chemical reagent		-0.447		0.000916	Ccl2,CCL5,Ccl7,CXCL3
KRT17		other	Activated	2		0.000916	CCL5,CXCL10,CXCL3,SPP1
4-(2-aminoethyl)benzenesulfonylfluoride		chemical - protease inhibitor		0.218	bias	0.000916	ADAMTSL1,ATP1A2,ENPP2,SPN
clodronic acid		chemical drug		1.067		0.000916	Ccl2,CXCL10,SELE,VCAM1	150 (16)
AKT1	0.214	kinase		1.74		0.000931	ACTC1,CCL5,CD74,CIDEA,CXCL10,ESR1,IGFBP5,KDR,NOS2,PPP1R1B,PTGS2,SPP1	126 (23)
EPO		cytokine		0.128		0.000931	ANK1,B2M,BCL3,Ifi27l2a/Ifi27l2b,KIT,LDLR,NFKBIA,PRKCQ,PTGS2,SELE,SPP1,UCP2	125 (17)
P38 MAPK		group	Activated	2.501	bias	0.000932	ANK1,Ccl2,CCL5,CXCL10,CXCL3,CYP1A1,EDNRB,FST,IGFBP5,NOS2,NR4A1,PTGS2,SELE,VCAM1	91 (20)
TCR		complex		1.948	bias	0.000956	ADORA2A,BCL3,CCL5,CXCL10,IFI44,IL7,ISG15,KCNK5,NFKBIA,NR4A1,RSAD2,SEMA3A,SPP1,TNFAIP3	106 (14)
SREBF1	0.105	transcription regulator		1.841	bias	0.00098	AK4,CIDEA,CXCL10,H2-Q8,HK2,KLK3,LDLR,NOS2,PLEKHA4,PTGS2,UCP2	92 (17)
IL25		cytokine	Activated	2.216		0.000985	Ccl2,CCL5,CIDEA,IL33,KDR	111 (16)
NFKBIB	0.321	transcription regulator		-1.128		0.000985	CCL5,NFKBIA,NOS2,SELE,VCAM1	92 (14)
CXCL8		cytokine	Activated	2.375		0.00102	CD74,CXCL3,KLK3,NFKBIA,PTGS2,VCAM1	115 (18)
Jnk		group		1.9	bias	0.00102	Ccl2,CCL5,Cxcl15,CXCL3,GRIA1,NOS2,NR4A1,PTGS2,SELE,VCAM1	94 (19)
peptidoglycan		chemical - endogenous non-mammalian	Activated	2.307	bias	0.00103	Ccl2,CCL5,CD274,CXCL10,CXCL3,NOS2,PTGS2	89 (16)
POSTN	-0.429	other		-0.152		0.00103	ADAMTS4,Ccl2,PTN,SPP1	51 (7)
NRXN1		transporter				0.00103	EPHA7,FLRT2,ITGA7,MMRN1
parthenolide		chemical drug		-1.982		0.00103	Ccl2,CCL5,PTGS2,VCAM1	126 (15)
cigarette smoke		chemical toxicant	Activated	2.254	bias	0.00104	C3,Ccl2,CXCL10,Cxcl15,CXCL3,CYP1A1,KDR,NFKBIA,NOS2,PGF,PTGS2	126 (19)
leukotriene D4		chemical - endogenous mammalian	Activated	2.2	bias	0.00107	APOLD1,NR4A1,PTGS2,RGS2,SELE	114 (9)
PTGES		enzyme				0.00107	Ccl2,CXCL3,ITGA6,NOS2,PTGS2	102 (15)
anisomycin		chemical - endogenous non-mammalian		0.739		0.00107	CYP1A1,LDLR,NR4A1,RGS7,SPP1	119 (17)
THRB	-0.255	ligand-dependent nuclear receptor	Inhibited	-2.646		0.0011	Ccl2,CXCL10,CXCL3,IL7,LDLR,NR4A1,PTGS2,SFRP2,WIF1,WNT2	109 (21)
LIF	0.816	cytokine	Activated	2.592		0.0011	Ccl2,CXCL10,ENPP2,HK2,IL7,KDR,LBP,PAPPA2,PTGS2,SPP1	143 (22)
PADI2		enzyme				0.00113	CXCL3,PTGS2,RAB6B
SHARPIN	-0.178	other				0.00113	CXCL10,ISG15,TNFAIP3	111 (12)
SMC3	-0.037	other				0.00113	HLA-DQA1,HLA-DQB1,SOX4
CRKL	0.27	kinase				0.00113	CXCL10,Cxcl9,HDC	59 (7)
IFNA8		cytokine				0.00113	CXCL10,ISG15,ZBP1	75 (8)
IFNA16		cytokine				0.00113	CXCL10,ISG15,ZBP1	75 (8)
hydroxyflutamide		chemical drug				0.00113	KLK3,VCAM1,WIF1
amlodipine		chemical drug				0.00113	IGFBP5,LDLR,PTGS2	78 (11)
4-hydroxytamoxifen		chemical drug	Activated	2.081		0.00114	ACTC1,C3,CDCA7,CYP1A1,ESR1,NFKBIA,RASD1,RGS16,TNFAIP3	118 (12)
GNA15	0.286	enzyme				0.00114	C3,Ccl2,CXCL3,FHL2,LBP,PTGS2,RGS2	97 (20)
DNMT1	0.165	enzyme				0.00116	Cdkn1c,ESR1,PTGS2,PTN,RELN,SFRP2	86 (13)
CFTR		ion channel		0.651		0.00116	CCL5,CXCL3,NFKBIA,NOS2,PTGS2,TNFAIP3	132 (17)
NOTCH3	-0.61	transcription regulator		1.4	bias	0.00116	Cdkn1c,DTX1,NOS2,PRKCQ,PTX3	66 (7)
BIRC5	0.461	other				0.00116	CD74,FMOD,HLA-DQA1,HLA-DQB1,IL2RG
MAPK7	0.171	kinase	Activated	2.236		0.00116	Ccl2,CXCL3,NOS2,NR4A1,PTGS2	89 (15)
CpG ODN 1668		chemical reagent	Activated	2.2	bias	0.00116	Ccl2,CXCL10,CXCL3,ISG15,PTGS2	94 (16)
HEY2	-0.03	transcription regulator		0.083	bias	0.00116	NR2F2,PROX1,SCN5A,TBX2
Cdk		group				0.00116	CCL5,CXCL10,RGS2,UCP2
ALOX15		enzyme		1.718		0.00116	Ccl2,NOS2,RGS2,VCAM1	103 (20)
UBE2I	-0.056	enzyme		-1		0.00116	CIDEA,CXCL10,NOS2,TAP1	118 (22)
bafilomycin A1		chemical drug		-0.849		0.00116	CXCL10,NFKBIA,NOS2,PTGS2	122 (19)
trans-cinnamaldehyde		chemical drug				0.00118	NOS2,PTGS2	69 (7)
SEW 2871		chemical reagent				0.00118	CXCL10,S1PR1
tylophorine		chemical drug				0.00118	NOS2,PTGS2	89 (11)
CYP2C8		enzyme				0.00118	Ccl2,SELE
P2RY6	0.343	G-protein coupled receptor				0.00118	Ccl2,VCAM1	87 (12)
Serine Protease		group				0.00118	Ccl2,NOS2	55 (5)
anatabine		chemical - endogenous non-mammalian				0.00118	NOS2,PTGS2
MOGAT1		enzyme				0.00118	Ccl2,CXCL10
SKLB023		chemical reagent				0.00118	NOS2,PTGS2	75 (12)
Hyaluronidase		biologic drug				0.00118	ADAMTS4,ITIH5
APOC3		transporter				0.00118	NOS2,VCAM1	50 (7)
(+)-epicatechin		chemical drug				0.00118	NOS2,PTGS2
apicularen A		chemical reagent				0.00118	NFKBIA,NOS2
clomiphene		chemical drug				0.00118	ESR1,LDLR
ethyl linoleate		chemical - endogenous mammalian				0.00118	NOS2,PTGS2
vanadium pentoxide		chemical toxicant				0.00118	CXCL10,PTGS2	63 (7)
galangin		chemical - endogenous non-mammalian				0.00118	NOS2,SELE	111 (11)
flavone		chemical - endogenous non-mammalian				0.00118	NOS2,PTGS2	123 (11)
SPP1	1.89	cytokine		1.814	bias	0.00118	Acp5,Ccl2,CCL5,CXCL3,DSP,NDRG2,NOS2,PTGS2,SPP1	121 (22)
PRKAA1	0.049	kinase		-0.707		0.0012	CDH3,EGLN3,ITIH5,NDRG2,NFKBIA,RGS2,TTYH1,VCAM1	104 (10)
IL7	0.789	cytokine		1.463	bias	0.0012	Ccl2,CD2,CD274,CXCL3,IL7,RGS16,S1PR1,UPP1	135 (20)
lithium chloride		chemical drug		0.61		0.0012	BCL3,FSCN1,HAPLN1,KLK3,NOS2,PTGS2,PTX3	133 (18)
IL3		cytokine		1	bias	0.00125	APBA2,HK2,HLA-A,IL33,PAPPA2,PDPN,PRG2,PROX1,SELE,Serpina3g (includes others),SOX4,UCP2,VCAM1	96 (7)
S-nitroso-N-acetylpenicillamine		chemical reagent		0.068		0.00131	LDLR,MARCKSL1,NOS2,PTGS2	143 (20)
mycophenolic acid		chemical drug		0.816	bias	0.00131	CD274,CXCL3,DUSP14,LDLR,PTGS2,TNFAIP3	80 (11)
paclitaxel		chemical drug		0.917		0.00132	APLNR,CD274,CXCL10,CYP1A1,ENPP2,HLA-A,ITGA6,KLK3,NFKBIA,PTGS2,STC1,TFPI2	163 (24)
ethanol		chemical - endogenous mammalian		0.39		0.00135	Ccl2,CCL5,Ccl7,CXCL3,Cxcl9,EDNRB,ESR1,HLA-A,NOS2,PPP1R1B,PTGS2,SELE,TFPI2,VCAM1	124 (20)
SCD	-0.074	enzyme	Inhibited	-2.2		0.00136	Ccl2,CXCL10,CXCL3,NOS2,UCP2	105 (19)
rotenone		chemical toxicant		-0.13		0.00136	KDR,NOS2,PTGS2,UCP2,VCAM1	101 (21)
thioctic acid		chemical drug		-1.446		0.00136	Ccl2,NOS2,SELE,UCP2,VCAM1	116 (20)
LY96	-0.028	transmembrane receptor				0.00137	CCL5,CXCL3,SELE	106 (20)
STK3	-0.106	kinase				0.00137	PDPN,SOX4,SPP1
EPHX2	-0.013	enzyme				0.00137	Ccl2,SELE,VCAM1	97 (18)
DIRAS3		enzyme				0.00137	HLA-DQA1,HMGA1,TFPI2
S1PR3	-1.151	G-protein coupled receptor				0.00137	Ccl2,PTGS2,VCAM1	112 (22)
101.10 peptide		chemical reagent				0.00137	Ccl2,Cxcl15,PTGS2	82 (15)
farnesyl pyrophosphate		chemical - endogenous mammalian				0.00137	NOS2,PTGS2,VCAM1	121 (19)
MAP2K1	-0.139	kinase	Activated	2.213	bias	0.00138	CCL5,CD274,CXCL3,HDC,LDLR,NFKBIA,NOS2,PTGS2,TFPI2	125 (19)
phytohemagglutinin		chemical drug		1.927	bias	0.00139	BCL3,CACNB2,CCL5,CXCL10,ENPEP,IL2RG,ITIH4,KIT,LBP,PGF,SOX4,SPP1	118 (15)
MIF	0.006	cytokine	Activated	2.404	bias	0.0014	Ccl2,CXCL3,IL7,ITIH5,NOS2,PTGS2,VCAM1	92 (20)
RARRES3		enzyme		1.949	bias	0.00146	CCL5,CXCL10,ISG15,UBD	106 (18)
[truncated: 1,386 more rows]
