# Supplementary material for: Sphingosine 1-phosphate-regulated transcriptomes in heterogenous arterial and lymphatic endothelium of the aorta
Source: eLife. 2020 Feb 24;9:e52690. doi: 10.7554/eLife.52690 (PMC7054001; doi:10.7554/eLife.52690)
Supplement: Supplementary file 3. — edgeR results from differential accessibility analysis are included, as well as the genomics coordinates of differentially accessible peaks and the motif analyses (HOMER) results shown in Figure 2C–F. [file elife-52690-supp3.xlsx]

## Sheet: GFP.edgeR.all.peaks
List of peaks from GFPlow vs GFPhigh FACS sorted MAECs. EdgeR cutoff of CPM>1 in at least 2 out of 3 replicates and statistics regarding differential accessibility (Figure 2B) are shown.
Row.names	GFPneg.249	GFPneg.664	GFPneg.972	GFPpos.248	GFPpos.665	GFPpos.973	logFC	logCPM	LR	PValue	FDR
chr9:115589617:115590392	29	9	20	189	111	218	-3.28421	3.86042	68.5579	1.23209e-16	6.65179e-12
chr15:93338575:93339258	21	8	6	160	66	198	-3.66055	3.48452	65.627	5.44883e-16	1.47086e-11
chr1:192023817:192024517	24	14	9	159	111	181	-3.38166	3.6897	62.7639	2.33037e-15	3.1453e-11
chr5:147847421:147848148	16	8	4	113	61	154	-3.61137	3.15357	63.3118	1.76444e-15	3.1453e-11
chr5:30896100:30896762	7	2	4	110	36	82	-4.18805	2.62014	62.1631	3.1616e-15	3.41377e-11
chr3:31151202:31152021	41	11	22	192	128	245	-3.09388	4.00838	61.5429	4.33192e-15	3.89786e-11
chr13:107550175:107551589	78	31	39	308	176	477	-2.77978	4.74634	59.111	1.49021e-14	1.13193e-10
chr6:92824683:92825294	28	9	16	136	85	180	-3.03759	3.51211	58.8783	1.67731e-14	1.13193e-10
chr5:76475388:76476230	56	16	14	266	159	333	-3.31973	4.38951	58.2444	2.31495e-14	1.2498e-10
chr6:119619793:119620129	2	0	1	33	25	42	-5.02904	1.51439	58.3519	2.19184e-14	1.2498e-10
chr15:7157981:7158669	33	16	12	161	99	197	-3.01389	3.71066	55.6548	8.63827e-14	4.23966e-10
chr8:125055236:125055740	14	2	7	79	42	128	-3.51187	2.74713	55.0121	1.19792e-13	5.38943e-10
chr8:112581827:112582359	9	6	5	93	48	77	-3.52935	2.64952	54.737	1.37785e-13	5.72213e-10
chr9:13714334:13715132	23	6	18	112	85	261	-3.34258	3.61293	54.3559	1.67271e-13	6.45046e-10
chr6:120975086:120975708	36	10	11	220	86	190	-3.26859	3.77604	53.3483	2.79356e-13	1.00546e-09
chr10:84128392:84128841	12	4	2	72	61	79	-3.75014	2.63171	53.0738	3.2125e-13	1.08398e-09
chr10:85286425:85286842	5	1	6	46	38	71	-3.76864	2.14899	52.4328	4.45217e-13	1.4139e-09
chr9:79874247:79874905	22	16	9	116	99	180	-3.15137	3.51311	51.8831	5.89041e-13	1.76673e-09
chr13:115524905:115525671	34	14	13	217	121	151	-3.19231	3.84735	51.2215	8.25107e-13	2.22729e-09
chr19:47506730:47507296	48	24	19	203	112	274	-2.76732	4.06736	51.2263	8.23091e-13	2.22729e-09
chr4:45487614:45488228	30	14	23	134	95	169	-2.68299	3.5747	49.0488	2.49674e-12	6.41875e-09
chr13:29269446:29270312	56	13	18	202	126	243	-2.91848	4.03943	48.0675	4.11806e-12	9.66634e-09
chr18:35841176:35841665	10	5	1	60	34	78	-3.49344	2.28192	48.1389	3.97066e-12	9.66634e-09
chr6:55228438:55229075	22	6	7	86	56	117	-3.02825	2.89995	47.6366	5.13018e-12	1.15403e-08
chr14:69313824:69314473	55	14	16	288	137	210	-3.12823	4.192	46.9951	7.1164e-12	1.5368e-08
chr6:115959265:115959880	34	8	11	121	99	152	-3.03927	3.45883	46.8878	7.51685e-12	1.56085e-08
chr11:120142509:120143115	11	5	3	80	49	59	-3.46733	2.48382	46.3013	1.01396e-11	2.02746e-08
chr19:40373596:40374072	15	2	2	77	37	80	-3.51135	2.44418	46.0428	1.15698e-11	2.19341e-08
chr2:127139559:127140853	78	15	23	281	142	464	-3.08789	4.56513	46.0072	1.1782e-11	2.19341e-08
chr12:40646964:40647536	59	14	15	219	109	300	-2.99156	4.11037	45.5349	1.49945e-11	2.69492e-08
chr4:11622890:11623312	8	10	5	84	35	112	-3.26585	2.67129	45.4732	1.54743e-11	2.69492e-08
chr12:104565207:104565994	34	6	6	159	103	142	-3.41849	3.54611	45.2835	1.70476e-11	2.78899e-08
chr2:59676855:59677490	18	13	16	114	65	121	-2.73249	3.16111	45.2886	1.70033e-11	2.78899e-08
chr8:14994385:14994915	35	10	7	123	82	187	-3.07343	3.46513	45.1914	1.78684e-11	2.8373e-08
chr2:174427804:174428064	5	1	0	32	19	43	-4.00663	1.43801	44.9672	2.00363e-11	3.09062e-08
chr11:68066999:68067492	19	7	5	88	40	114	-3.03771	2.76294	44.7266	2.26555e-11	3.35678e-08
chr7:4080277:4080974	41	10	11	114	112	275	-3.18096	3.7926	44.6966	2.30053e-11	3.35678e-08
chr9:60364840:60365235	7	4	1	45	22	93	-3.69611	2.09751	44.4966	2.54797e-11	3.62e-08
chr1:93771743:93772292	9	6	8	74	44	65	-3.08428	2.4608	43.8143	3.6105e-11	4.99804e-08
chr8:125872005:125872436	5	1	2	59	23	34	-3.94953	1.75539	43.7524	3.72666e-11	5.02987e-08
chr4:132539687:132540358	23	3	4	88	48	129	-3.30703	2.86567	43.4939	4.25279e-11	5.46665e-08
chrX:18038310:18038797	31	7	19	119	72	143	-2.70129	3.30148	43.534	4.16658e-11	5.46665e-08
chr1:61430300:61431503	105	38	45	332	199	348	-2.39656	4.74204	42.7076	6.35648e-11	7.98078e-08
chr6:134931145:134932629	195	56	107	567	305	783	-2.3401	5.59601	42.6031	6.70529e-11	8.22739e-08
chr11:89663200:89663745	12	4	1	82	56	52	-3.72079	2.51043	42.2109	8.19422e-11	9.83087e-08
chr9:115595737:115596008	5	2	1	33	18	48	-3.64476	1.51468	42.0749	8.78415e-11	1.03095e-07
chr10:95327033:95327966	36	6	9	144	58	245	-3.23863	3.54413	42.0121	9.07109e-11	1.04198e-07
chr6:107798477:107798791	12	0	0	62	40	55	-3.97855	2.17748	41.3221	1.29099e-10	1.45204e-07
chr1:36628353:36628842	25	10	10	92	69	104	-2.72379	3.01945	41.1436	1.41445e-10	1.55843e-07
chr14:104196053:104196551	8	5	1	43	24	94	-3.49187	2.12829	40.9315	1.57661e-10	1.67184e-07
chr2:52953917:52954516	33	14	15	101	68	172	-2.54014	3.32124	40.9281	1.57931e-10	1.67184e-07
chr11:97384808:97386060	76	36	36	240	154	274	-2.30438	4.36519	40.8135	1.67469e-10	1.73872e-07
chr3:101969339:101969856	22	9	8	77	45	164	-2.90016	2.97539	40.6158	1.85307e-10	1.85265e-07
chr8:23803447:23804039	14	7	3	48	49	112	-3.2048	2.57904	40.6172	1.85167e-10	1.85265e-07
chr18:5371978:5372306	6	6	6	92	25	67	-3.32834	2.37349	40.3989	2.07056e-10	2.03246e-07
chr8:3311255:3311958	22	6	10	166	99	71	-3.42522	3.35398	40.2204	2.26861e-10	2.1871e-07
chr8:23802690:23803436	30	16	9	103	71	245	-2.9406	3.51211	40.1722	2.32533e-10	2.20246e-07
chr4:147891379:147891604	4	0	0	27	19	25	-4.22319	1.11516	40.0173	2.51721e-10	2.34309e-07
chr6:53470105:53470410	6	2	1	26	22	60	-3.61477	1.62541	39.9531	2.60136e-10	2.38038e-07
chr3:52161520:52162139	22	8	17	91	48	126	-2.55903	2.95929	39.853	2.73809e-10	2.46374e-07
chr4:3587093:3587480	27	7	6	90	60	108	-2.87784	2.9323	39.6381	3.05659e-10	2.70523e-07
chr9:14946794:14947431	17	8	10	116	31	118	-2.9239	2.87311	39.5901	3.13263e-10	2.72782e-07
chr6:72021326:72021774	8	6	0	45	26	88	-3.4831	2.13097	39.5091	3.26539e-10	2.79829e-07
chr2:127161485:127162404	66	29	51	236	117	290	-2.20547	4.2731	39.4746	3.32359e-10	2.80366e-07
chr7:108613696:108614361	26	10	9	166	59	99	-2.98674	3.23473	39.4218	3.41467e-10	2.83617e-07
chr7:77514276:77514779	9	2	3	112	15	81	-3.90429	2.43906	39.0563	4.11749e-10	3.36811e-07
chr2:158878936:158879932	76	50	25	349	202	358	-2.67426	4.74848	38.975	4.29268e-10	3.459e-07
chr14:98904614:98905008	6	0	3	49	22	32	-3.6429	1.61768	38.8438	4.59117e-10	3.54558e-07
chr6:17981144:17982208	100	33	38	237	203	367	-2.43152	4.61887	38.8863	4.4923e-10	3.54558e-07
chr8:14995978:14996454	20	3	8	78	33	110	-2.92763	2.62667	38.8412	4.59714e-10	3.54558e-07
chr19:40371715:40372475	34	11	16	120	56	141	-2.47944	3.22465	38.7937	4.71045e-10	3.5818e-07
chr19:47528705:47529957	78	20	34	295	170	223	-2.62824	4.39488	38.7557	4.80301e-10	3.60146e-07
chr1:174589715:174590126	10	3	7	88	50	43	-3.37904	2.46695	38.6752	5.00518e-10	3.65162e-07
chr19:42093496:42094067	11	4	10	69	33	67	-2.83603	2.33426	38.6987	4.9453e-10	3.65162e-07
chr10:92837527:92838420	62	19	24	178	91	253	-2.42642	3.92181	38.5271	5.4e-10	3.83599e-07
chr5:116331997:116332469	15	1	3	82	41	53	-3.45916	2.37081	38.5413	5.3607e-10	3.83599e-07
chr2:168458824:168459213	7	3	2	70	19	44	-3.51927	1.92745	38.462	5.58303e-10	3.9145e-07
chr4:118067067:118067679	48	11	6	163	103	232	-3.15051	3.797	38.4246	5.69107e-10	3.93909e-07
chr6:93154816:93155190	6	0	0	30	18	32	-3.83668	1.25704	38.332	5.9677e-10	4.07828e-07
chr1:19840059:19840425	9	7	0	60	50	57	-3.52731	2.33702	38.2955	6.08032e-10	4.10331e-07
chr10:120943609:120944036	12	3	8	56	34	62	-2.84288	2.20163	38.1343	6.60406e-10	4.40173e-07
chr7:103569391:103570155	38	23	24	167	92	152	-2.37012	3.67096	38.0811	6.7863e-10	4.46803e-07
chr1:193380859:193381362	39	8	7	140	101	132	-3.08035	3.47698	37.9966	7.08687e-10	4.55483e-07
chr3:81989482:81989915	8	5	8	57	23	87	-2.95921	2.23632	37.9995	7.07641e-10	4.55483e-07
chr10:56405644:56406216	34	12	8	111	62	145	-2.68494	3.21201	37.9003	7.44526e-10	4.67389e-07
chr10:6238211:6239092	70	26	21	241	107	271	-2.51853	4.16345	37.9079	7.41638e-10	4.67389e-07
chr9:75775344:75775676	2	0	3	40	23	20	-4.14825	1.35549	37.8125	7.788e-10	4.83285e-07
chr3:10208184:10208898	48	8	21	183	82	172	-2.6963	3.66807	37.7896	7.87994e-10	4.83434e-07
chr1:133375346:133375706	13	9	3	76	47	65	-3.02721	2.513	37.7354	8.1022e-10	4.91485e-07
chr2:65027337:65027855	24	15	26	113	62	188	-2.47315	3.39412	37.6616	8.41437e-10	4.99204e-07
chr3:31056476:31057186	36	14	8	109	74	164	-2.71156	3.34183	37.6762	8.35162e-10	4.99204e-07
chr3:136102829:136103365	14	2	4	99	35	51	-3.39936	2.42402	37.6288	8.55737e-10	5.02169e-07
chr11:120221330:120221723	11	3	4	35	31	80	-3.09856	2.07681	37.5927	8.71681e-10	5.06025e-07
chr4:138837572:138838255	24	9	6	200	74	78	-3.37348	3.35863	37.1896	1.07182e-09	6.15591e-07
chr14:48606204:48606909	38	15	13	136	71	132	-2.50114	3.35863	37.0765	1.13582e-09	6.38757e-07
chr18:69773319:69773903	34	12	19	93	64	179	-2.44537	3.2982	37.0944	1.12546e-09	6.38757e-07
chr10:104262846:104263235	15	2	5	70	24	76	-3.04598	2.26328	37.0469	1.15319e-09	6.41842e-07
chr13:32260850:32261406	26	6	7	103	43	99	-2.79925	2.8304	37.0231	1.16737e-09	6.43102e-07
chr16:96012250:96012605	10	0	5	33	37	61	-3.31175	1.96959	36.959	1.20638e-09	6.5788e-07
chr4:105338767:105339186	19	2	7	56	55	81	-3.01859	2.53918	36.9044	1.24069e-09	6.69822e-07
chr6:93117160:93117553	6	2	1	19	29	68	-3.74891	1.73072	36.8467	1.27793e-09	6.76727e-07
chr8:127095436:127096079	46	8	8	117	109	214	-3.08621	3.65542	36.8457	1.27855e-09	6.76727e-07
chr8:3313822:3314132	5	1	2	45	30	23	-3.80136	1.61027	36.7395	1.35013e-09	7.07676e-07
chr17:74299367:74299963	37	17	16	164	60	150	-2.49049	3.45663	36.7004	1.37751e-09	7.15088e-07
chr8:114253553:114254266	16	7	10	81	28	105	-2.70508	2.60336	36.4757	1.5458e-09	7.94808e-07
chr1:90521689:90522175	23	2	2	70	48	139	-3.44806	2.80024	36.4547	1.56252e-09	7.95825e-07
chr12:37834685:37835966	54	17	41	184	110	200	-2.28662	3.93154	36.4037	1.60394e-09	8.04414e-07
chr6:147721766:147722154	7	3	3	35	31	41	-3.17464	1.73854	36.3974	1.60919e-09	8.04414e-07
chr4:85699652:85699999	14	8	9	55	35	133	-2.82155	2.63732	36.3678	1.63376e-09	8.09208e-07
chr11:72298770:72299100	2	0	4	33	27	23	-3.91732	1.38469	36.2933	1.69749e-09	8.11474e-07
chr19:40489533:40489913	4	2	4	47	11	59	-3.47707	1.69264	36.2922	1.69846e-09	8.11474e-07
chr8:66641520:66641933	22	5	10	86	41	83	-2.64664	2.65324	36.2926	1.69804e-09	8.11474e-07
chr9:115546275:115546640	15	6	1	49	40	88	-3.12366	2.36014	36.335	1.6615e-09	8.11474e-07
chr1:192030808:192031342	13	7	2	39	50	113	-3.28035	2.52857	36.2646	1.72265e-09	8.15809e-07
chr2:33035352:33035807	25	3	8	97	39	102	-2.88312	2.76287	36.2121	1.76966e-09	8.30788e-07
chr11:89915633:89916412	40	13	10	142	55	201	-2.73361	3.45916	36.1801	1.79894e-09	8.37252e-07
chr5:58329712:58330055	7	1	6	48	20	47	-3.10374	1.76687	36.1376	1.83863e-09	8.4841e-07
chr10:79270618:79270984	6	2	8	50	39	42	-3.18576	2.03247	36.1077	1.86707e-09	8.54231e-07
chr2:166946536:166947090	17	5	2	96	61	54	-3.40668	2.68178	36.0742	1.89943e-09	8.61733e-07
chr16:31058686:31059329	30	4	9	112	78	90	-3.00459	3.09216	36.0303	1.94276e-09	8.74048e-07
chr5:74143336:74144121	54	25	28	158	82	241	-2.21677	3.83463	36.0101	1.96299e-09	8.75849e-07
chr8:28073553:28074224	32	23	14	128	70	168	-2.43504	3.44637	35.8363	2.14608e-09	9.49694e-07
chr11:103611840:103612397	11	7	0	88	70	52	-3.76969	2.6836	35.7199	2.2783e-09	1e-06
chr14:32213985:32214539	10	6	3	64	38	44	-3.08173	2.17474	35.619	2.39937e-09	1.04465e-06
chr10:21414943:21415469	14	5	8	50	30	88	-2.68617	2.29949	35.5151	2.53085e-09	1.07587e-06
chr5:76463053:76463590	12	2	2	72	30	41	-3.35103	2.08551	35.5388	2.50019e-09	1.07587e-06
chr6:31171436:31171964	28	15	26	121	65	135	-2.28411	3.30429	35.5163	2.52931e-09	1.07587e-06
chr1:61123393:61123721	6	2	0	35	41	27	-3.94813	1.71219	35.4571	2.60724e-09	1.09148e-06
chr4:86042572:86043159	42	10	11	134	60	160	-2.63821	3.34747	35.4566	2.60801e-09	1.09148e-06
chr17:3435034:3435508	18	6	11	77	29	111	-2.656	2.62336	35.4035	2.6801e-09	1.11303e-06
chr6:48398465:48398938	36	13	8	115	58	156	-2.63557	3.24636	35.3791	2.71389e-09	1.11845e-06
chr2:83859822:83860524	31	10	12	113	79	92	-2.64976	3.1575	35.3269	2.78749e-09	1.13151e-06
chr4:54917956:54918713	18	7	7	79	58	61	-2.83953	2.64123	35.3401	2.76869e-09	1.13151e-06
chr12:76388917:76389225	10	2	2	39	23	47	-3.07682	1.71149	35.306	2.81758e-09	1.13519e-06
chr6:17428891:17429510	16	3	9	44	50	88	-2.87122	2.46012	35.257	2.88945e-09	1.15552e-06
chrX:39412443:39412839	6	8	7	58	27	68	-2.83834	2.18292	35.1867	2.99556e-09	1.18915e-06
chr6:94115977:94116475	27	7	10	80	66	90	-2.64603	2.88143	35.1562	3.04291e-09	1.19913e-06
chr16:96157045:96157446	4	9	5	81	90	51	-3.766	2.8194	35.1412	3.06649e-09	1.19967e-06
chr16:85546602:85547488	64	24	56	223	139	243	-2.20486	4.24204	35.1059	3.12254e-09	1.2128e-06
chr1:132899732:132900343	34	17	12	97	66	158	-2.42836	3.26258	35.0697	3.18109e-09	1.22672e-06
chr1:157737118:157737429	9	0	2	31	19	51	-3.29853	1.55667	35.0039	3.29053e-09	1.25992e-06
chr12:46029408:46030019	24	4	6	54	52	140	-3.00867	2.79332	34.9844	3.32361e-09	1.26363e-06
chr4:152397775:152398194	19	3	5	71	25	128	-3.10518	2.57796	34.9041	3.46346e-09	1.30759e-06
chr11:70119586:70119939	13	0	4	60	39	43	-3.3327	2.11099	34.8861	3.49569e-09	1.31059e-06
chr12:76389404:76389648	4	3	4	40	16	42	-3.1533	1.54893	34.8134	3.6287e-09	1.35108e-06
chr10:56604734:56605268	24	2	13	83	53	94	-2.76483	2.78456	34.7786	3.69407e-09	1.3567e-06
chr8:129269829:129270412	38	8	14	107	83	117	-2.60236	3.25096	34.7914	3.66987e-09	1.3567e-06
chr11:72288446:72289225	31	3	14	82	59	187	-2.91275	3.1796	34.7366	3.77472e-09	1.37696e-06
chr19:47532288:47533706	120	69	116	382	242	579	-2.01686	5.21194	34.5952	4.05908e-09	1.47075e-06
chr6:93124594:93125408	58	14	19	156	127	167	-2.579	3.81064	34.5386	4.17872e-09	1.49405e-06
chr8:113968068:113968468	16	7	4	45	45	86	-2.82905	2.40794	34.5493	4.15587e-09	1.49405e-06
chr15:43510381:43510840	34	13	11	109	49	145	-2.4617	3.14348	34.3483	4.60808e-09	1.61546e-06
chr16:5912061:5912369	10	0	2	28	23	60	-3.33189	1.68071	34.3529	4.59715e-09	1.61546e-06
chr19:38640596:38641318	36	12	9	90	66	281	-2.97753	3.53116	34.367	4.5639e-09	1.61546e-06
chr15:81853001:81853262	4	1	1	42	17	20	-3.80777	1.27601	34.1635	5.06711e-09	1.75703e-06
chr16:38368387:38368717	11	1	2	32	27	52	-3.14521	1.73624	34.1597	5.07699e-09	1.75703e-06
chr7:118870431:118870865	18	2	5	57	27	91	-2.916	2.3053	34.1118	5.2034e-09	1.78931e-06
chr1:19847002:19847281	8	0	0	32	20	32	-3.55503	1.34774	34.0823	5.283e-09	1.78967e-06
chr2:71510855:71512105	200	80	68	508	292	642	-2.18531	5.45131	34.0746	5.30391e-09	1.78967e-06
chr4:152591511:152592119	26	24	8	218	120	125	-3.09615	3.80276	34.0825	5.28245e-09	1.78967e-06
chr7:30038752:30039201	23	8	7	123	43	77	-2.81682	2.8444	34.0118	5.47776e-09	1.83685e-06
chr4:128933657:128934189	29	8	10	78	43	171	-2.69066	3.0159	33.8922	5.82531e-09	1.94134e-06
chr18:47741034:47741479	22	0	6	65	42	119	-3.21103	2.64518	33.8752	5.87624e-09	1.9463e-06
chr3:114838254:114838677	6	3	4	37	16	51	-3.00205	1.61905	33.8421	5.97726e-09	1.96768e-06
chr3:157839897:157840234	9	0	0	57	19	33	-3.77816	1.66014	33.8132	6.06652e-09	1.98497e-06
chr11:31738369:31738925	15	13	7	75	35	107	-2.60951	2.66212	33.7198	6.36507e-09	2.07011e-06
chr18:62305707:62306436	40	12	15	102	57	169	-2.38907	3.26325	33.6262	6.67857e-09	2.15906e-06
chr12:80939149:80939840	39	15	20	98	64	227	-2.42907	3.47008	33.5774	6.84838e-09	2.18775e-06
chr15:60993041:60993303	4	2	0	25	19	25	-3.60272	1.12331	33.5882	6.81034e-09	2.18775e-06
chr7:131062827:131063455	33	10	13	132	53	103	-2.50934	3.11592	33.5029	7.11588e-09	2.25983e-06
chr1:64354620:64355389	27	14	8	80	51	139	-2.51745	2.98801	33.4621	7.26645e-09	2.29416e-06
chr1:192005301:192006112	74	23	13	196	148	284	-2.72368	4.20579	33.4477	7.32049e-09	2.29778e-06
chr2:102099264:102099801	30	16	11	124	60	106	-2.45501	3.1528	33.4169	7.4376e-09	2.32105e-06
chr16:91413372:91413784	13	2	1	45	34	45	-3.18305	1.92602	33.314	7.84161e-09	2.42715e-06
chr3:126680290:126680602	6	5	7	34	25	86	-2.96275	2.05231	33.3076	7.86752e-09	2.42715e-06
chr13:95097944:95098384	36	11	6	110	69	123	-2.70723	3.17586	33.2251	8.20852e-09	2.50374e-06
chr2:125300457:125300857	18	6	0	58	42	106	-3.22965	2.53766	33.2324	8.17765e-09	2.50374e-06
chr13:8643113:8643640	26	2	8	96	54	78	-2.93263	2.77409	33.1492	8.53499e-09	2.58869e-06
chr17:47609342:47609805	6	1	4	32	37	30	-3.39975	1.67468	33.0639	8.91808e-09	2.68977e-06
chr4:117511071:117511345	0	2	2	12	16	75	-4.43914	1.46262	33.0291	9.07917e-09	2.72315e-06
chr11:114728140:114729055	73	26	30	163	112	240	-2.13812	3.99481	32.9541	9.43588e-09	2.79903e-06
chr8:27884053:27884300	2	4	2	19	23	47	-3.45596	1.4312	32.9617	9.39925e-09	2.79903e-06
chr6:29195764:29196069	5	4	2	28	22	40	-3.08327	1.48422	32.9297	9.5552e-09	2.81894e-06
chr14:69758987:69759431	15	6	4	51	29	68	-2.65406	2.15936	32.9	9.70235e-09	2.83221e-06
chr15:78260259:78261119	56	17	18	115	94	248	-2.45996	3.73851	32.8994	9.7051e-09	2.83221e-06
chr6:73063395:73064372	60	14	39	187	83	263	-2.33138	3.94719	32.8512	9.94873e-09	2.8877e-06
chr3:20886101:20886456	4	2	5	41	12	49	-3.17238	1.55992	32.8358	1.00279e-08	2.89512e-06
chr8:113493958:113494457	20	12	12	56	60	124	-2.52269	2.87041	32.8152	1.01351e-08	2.91049e-06
chr1:167548077:167548804	40	22	38	149	74	217	-2.14923	3.72235	32.8024	1.0202e-08	2.9142e-06
chr15:74580782:74581087	7	3	2	34	23	35	-3.04609	1.52821	32.7624	1.04138e-08	2.95906e-06
chr5:99765463:99765797	10	3	0	47	44	34	-3.5459	1.97704	32.6326	1.11329e-08	3.14683e-06
chr8:48473430:48473989	21	6	18	86	75	80	-2.64279	2.94918	32.5141	1.18333e-08	3.32738e-06
chr5:123530063:123530373	10	2	0	38	19	44	-3.18593	1.58555	32.4881	1.19927e-08	3.35473e-06
chr9:114816551:114816898	12	0	5	54	31	40	-3.10063	1.93836	32.4266	1.23781e-08	3.44468e-06
chr13:51831533:51831941	13	0	6	46	22	68	-2.94658	1.97114	32.4027	1.2531e-08	3.46935e-06
chr4:138125655:138126478	38	11	8	147	80	101	-2.76869	3.32375	32.3863	1.26374e-08	3.48095e-06
chr18:69687440:69688233	52	15	22	130	72	171	-2.20291	3.50679	32.3355	1.29725e-08	3.55499e-06
chr5:12401272:12401657	11	3	4	36	26	52	-2.77462	1.81077	32.3159	1.31037e-08	3.55499e-06
chr6:147681101:147681680	41	7	8	104	61	164	-2.74163	3.22975	32.3169	1.30966e-08	3.55499e-06
chr1:88039033:88041092	213	96	126	578	300	580	-1.8601	5.54886	32.2916	1.32687e-08	3.58175e-06
chr13:44515043:44515541	28	18	32	168	87	126	-2.37861	3.5769	32.2602	1.34849e-08	3.59154e-06
chr18:65149078:65149440	14	4	4	59	24	55	-2.7542	2.05081	32.2649	1.34522e-08	3.59154e-06
chr6:108394329:108395411	30	6	15	114	41	112	-2.50754	2.96809	32.2573	1.35045e-08	3.59154e-06
chr9:121978496:121979003	23	5	7	92	52	61	-2.79102	2.66827	32.227	1.37168e-08	3.63012e-06
chr1:62228262:62228567	12	1	0	67	29	36	-3.59501	1.96485	32.0171	1.52825e-08	4.02474e-06
chr12:81968008:81968465	25	4	5	83	58	68	-2.90962	2.68936	32.0072	1.53599e-08	4.02548e-06
chr10:37167136:37168039	53	13	23	117	75	259	-2.43448	3.67958	31.9938	1.54666e-08	4.03387e-06
chr2:5046497:5046938	24	2	7	81	45	72	-2.83017	2.57654	31.9639	1.57061e-08	4.07663e-06
chr6:92894272:92895099	47	9	22	158	106	120	-2.58079	3.5954	31.926	1.60157e-08	4.13712e-06
chr5:58173223:58173510	9	0	1	33	16	39	-3.25576	1.39012	31.9075	1.6169e-08	4.15682e-06
chr15:58884532:58884782	7	0	0	19	16	44	-3.57454	1.21396	31.8837	1.63688e-08	4.18824e-06
chr13:98223050:98223258	7	1	0	22	15	44	-3.3932	1.25682	31.7976	1.71104e-08	4.35734e-06
chr7:100943695:100943979	6	1	2	40	19	24	-3.33536	1.37131	31.7868	1.72061e-08	4.36114e-06
chr11:103163862:103164298	11	2	3	28	23	77	-3.06091	1.86822	31.7425	1.76029e-08	4.4256e-06
chr9:57165336:57165738	13	0	4	35	26	61	-3.00037	1.85049	31.7401	1.76244e-08	4.4256e-06
chr14:28594437:28594935	35	13	15	80	58	153	-2.29792	3.12938	31.706	1.79366e-08	4.43839e-06
chr15:75423150:75423857	72	20	22	174	107	208	-2.29519	3.90561	31.7253	1.77598e-08	4.43839e-06
chr4:3679262:3679849	40	18	16	121	78	120	-2.26378	3.34267	31.7038	1.79572e-08	4.43839e-06
chr8:3299284:3299845	22	8	3	103	56	64	-2.97706	2.76788	31.6987	1.80041e-08	4.43839e-06
chr11:77960075:77960769	42	7	12	191	89	98	-2.93006	3.51093	31.6463	1.84965e-08	4.53904e-06
chr1:107683158:107683867	36	6	9	121	43	136	-2.70641	3.0843	31.6204	1.87449e-08	4.57918e-06
chr2:72904331:72904859	30	8	6	69	54	118	-2.6223	2.84422	31.5736	1.92027e-08	4.6699e-06
chr15:35991106:35991457	24	9	3	77	52	85	-2.75092	2.70237	31.5258	1.96804e-08	4.74334e-06
chr4:90902135:90902367	6	2	4	44	21	29	-3.07598	1.5553	31.5284	1.96548e-08	4.74334e-06
chr12:70852784:70853407	43	11	7	114	62	183	-2.70172	3.34524	31.5011	1.99329e-08	4.78284e-06
chr3:52532722:52533166	14	4	8	39	29	101	-2.7345	2.2762	31.4774	2.0177e-08	4.81999e-06
chr19:34821189:34821924	28	7	17	68	57	117	-2.36185	2.89913	31.4658	2.02989e-08	4.82774e-06
chr6:93182349:93183294	89	19	49	229	126	292	-2.2093	4.2901	31.4198	2.07855e-08	4.9218e-06
chr5:73246830:73247432	64	32	21	173	157	209	-2.39456	4.10191	31.3207	2.18731e-08	5.1567e-06
chr11:72266432:72267234	31	4	5	92	71	88	-2.97623	2.93632	31.2935	2.2182e-08	5.16189e-06
chr2:114637820:114638795	42	5	18	126	57	161	-2.56929	3.30785	31.3094	2.20017e-08	5.16189e-06
chr9:32756618:32757029	6	4	5	82	24	32	-3.26668	2.04396	31.2996	2.2112e-08	5.16189e-06
chr10:84109714:84110278	17	2	3	38	31	134	-3.29016	2.43236	31.2706	2.24456e-08	5.20084e-06
chr10:92574018:92574411	10	3	4	59	22	38	-2.92086	1.85953	31.245	2.27437e-08	5.24738e-06
chr3:51453259:51453664	20	2	0	84	52	67	-3.53611	2.57249	31.08	2.47611e-08	5.68851e-06
chr10:127186122:127186758	57	15	15	127	105	169	-2.44425	3.63632	30.9238	2.68356e-08	6.0874e-06
chr12:37745650:37746190	25	9	14	165	90	60	-2.96828	3.30719	30.9296	2.67555e-08	6.0874e-06
chr13:24467218:24468018	58	26	32	192	91	167	-2.07313	3.83132	30.9309	2.67385e-08	6.0874e-06
chr11:89662491:89662930	20	1	3	87	59	50	-3.40883	2.58276	30.9077	2.7059e-08	6.10986e-06
chr7:77514888:77515234	8	1	5	36	15	51	-2.90348	1.59152	30.9004	2.7161e-08	6.10986e-06
chr16:23660403:23660812	8	2	4	59	16	37	-3.07278	1.73568	30.8876	2.73415e-08	6.12495e-06
chr4:33369279:33369753	20	1	4	73	28	72	-2.97967	2.31374	30.8608	2.77215e-08	6.18442e-06
chr9:121973842:121974766	132	72	90	381	231	384	-1.87113	5.0278	30.8391	2.80339e-08	6.22837e-06
chr12:55593820:55594526	29	8	18	81	42	153	-2.37551	2.99638	30.7848	2.88283e-08	6.37129e-06
chr19:34495666:34495926	3	0	6	26	15	41	-3.19337	1.30459	30.7791	2.89132e-08	6.37129e-06
chr2:71639712:71640141	23	11	4	93	63	72	-2.78462	2.83373	30.723	2.97618e-08	6.53163e-06
chr7:142013517:142014210	37	10	5	105	55	145	-2.70686	3.13241	30.7133	2.99103e-08	6.53764e-06
chr2:167600391:167601129	35	19	9	95	64	189	-2.50532	3.33245	30.6866	3.03256e-08	6.60169e-06
chr2:8337605:8337966	11	3	3	62	12	73	-3.11042	2.0126	30.6213	3.13625e-08	6.79999e-06
chr14:104231709:104232119	14	5	8	40	28	95	-2.62152	2.24699	30.6115	3.15213e-08	6.80709e-06
chr4:104896402:104896971	18	7	15	73	42	72	-2.33894	2.56527	30.5711	3.21845e-08	6.92262e-06
chr4:128731756:128732660	112	52	29	271	250	399	-2.43513	4.83116	30.3784	3.5547e-08	7.58542e-06
chr8:125222933:125223431	16	12	13	54	44	154	-2.57453	2.84829	30.385	3.54263e-08	7.58542e-06
chr13:49068653:49068950	12	1	0	26	32	60	-3.40045	1.80298	30.3564	3.59525e-08	7.64175e-06
chr2:24358537:24358896	10	5	4	33	22	69	-2.72547	1.87936	30.3436	3.61905e-08	7.66217e-06
chr12:104566572:104567355	36	17	17	114	57	116	-2.13498	3.17348	30.1568	3.98482e-08	8.37092e-06
chr16:23654762:23655008	3	0	2	33	17	14	-3.79165	1.03501	30.1617	3.97473e-08	8.37092e-06
chr14:31736527:31736904	10	4	1	43	34	33	-3.08171	1.81382	30.0882	4.12827e-08	8.5722e-06
chr8:123239108:123239466	9	7	1	41	56	46	-3.28647	2.20438	30.1002	4.10279e-08	8.5722e-06
chrX:96514638:96514903	5	4	1	43	22	24	-3.25034	1.49247	30.0901	4.12436e-08	8.5722e-06
chr2:75149035:75149646	31	6	15	64	57	133	-2.44172	2.93394	30.0639	4.18032e-08	8.61401e-06
chr5:139863702:139864749	70	26	34	194	116	174	-2.07692	3.96751	30.0683	4.17088e-08	8.61401e-06
chr2:153258142:153258792	39	11	13	99	88	103	-2.46754	3.22339	30.0414	4.22917e-08	8.68155e-06
chr11:12758347:12758834	21	2	4	72	24	91	-2.92296	2.38499	30.0262	4.26255e-08	8.71692e-06
chr1:156911032:156911863	72	27	22	202	95	213	-2.20789	3.95624	29.9858	4.35227e-08	8.86681e-06
chr4:3429530:3430043	29	18	13	123	65	94	-2.34731	3.15831	29.9762	4.37383e-08	8.87722e-06
chr16:17807331:17807889	21	10	5	85	34	78	-2.53817	2.5681	29.9336	4.47101e-08	9.00675e-06
chr6:125484892:125485310	11	4	4	56	28	36	-2.8093	1.91779	29.9402	4.45583e-08	9.00675e-06
chr5:12384998:12385588	26	4	4	60	38	181	-3.12996	2.87394	29.9232	4.49508e-08	9.02157e-06
chr10:95170607:95171042	16	1	6	87	34	43	-3.06927	2.30341	29.9156	4.51256e-08	9.02312e-06
chr6:94671342:94671679	18	0	5	77	29	58	-3.05559	2.25913	29.9027	4.54276e-08	9.04998e-06
chr17:31085323:31085705	10	8	2	33	30	101	-3.00189	2.21401	29.8889	4.57533e-08	9.08136e-06
chr10:56218939:56219387	14	9	3	44	38	71	-2.64733	2.24306	29.8648	4.6325e-08	9.14271e-06
chr13:118198786:118199043	4	3	4	27	13	52	-3.01053	1.43851	29.8616	4.64011e-08	9.14271e-06
chr12:96976051:96976385	6	1	6	33	20	36	-2.86398	1.48387	29.8106	4.76381e-08	9.35231e-06
chr13:111328075:111328934	134	44	43	282	163	452	-2.14607	4.74089	29.7927	4.80793e-08	9.40473e-06
chr12:56571500:56571759	4	0	4	29	9	40	-3.26034	1.19643	29.751	4.91247e-08	9.42986e-06
chr19:27231813:27232358	24	12	5	69	73	88	-2.69502	2.86989	29.756	4.89988e-08	9.42986e-06
chr3:122072886:122073415	19	2	14	59	36	91	-2.52863	2.47534	29.7515	4.91136e-08	9.42986e-06
chr4:132538650:132539457	44	7	23	133	55	169	-2.39896	3.37483	29.7769	4.84741e-08	9.42986e-06
chr5:145619443:145619719	8	2	1	29	14	43	-3.0158	1.36748	29.761	4.88724e-08	9.42986e-06
chr7:105603096:105603574	26	6	3	67	45	90	-2.72647	2.59512	29.7459	4.92558e-08	9.42986e-06
chr17:14050985:14052135	66	14	35	210	94	181	-2.26251	3.89316	29.7191	4.99405e-08	9.52716e-06
chr16:23506226:23506521	9	1	0	40	22	26	-3.34409	1.45281	29.685	5.08256e-08	9.62798e-06
chrX:34511209:34511550	5	4	5	31	21	41	-2.77166	1.55273	29.6856	5.08103e-08	9.62798e-06
chr16:91427681:91428058	11	2	0	26	21	72	-3.27499	1.74784	29.6103	5.28222e-08	9.97121e-06
chr10:52820536:52821732	56	24	48	138	112	238	-2.02636	3.94469	29.5939	5.32717e-08	1.0021e-05
chr1:184501354:184501628	8	1	2	22	17	48	-3.05186	1.38252	29.547	5.45757e-08	1.01601e-05
chr5:12936978:12937713	57	7	15	121	87	211	-2.64245	3.60036	29.5534	5.43975e-08	1.01601e-05
chr5:147641029:147641432	16	7	8	43	30	114	-2.59551	2.42269	29.5532	5.44016e-08	1.01601e-05
chr16:11046529:11046901	12	7	10	51	27	70	-2.38211	2.19028	29.5379	5.48353e-08	1.01734e-05
chr17:56260939:56261635	33	13	6	143	65	91	-2.711	3.18274	29.5089	5.56597e-08	1.02909e-05
chr1:156875897:156876162	10	0	5	29	20	55	-2.89191	1.63325	29.4819	5.64423e-08	1.03647e-05
chr7:108602130:108602643	16	12	3	87	40	68	-2.72609	2.56774	29.4866	5.63049e-08	1.03647e-05
chr5:31770045:31770873	116	33	29	256	171	330	-2.30276	4.53102	29.4257	5.81022e-08	1.06333e-05
chr9:117282304:117282865	27	3	23	98	67	108	-2.56528	3.06851	29.416	5.83921e-08	1.06502e-05
chr19:34799164:34799516	6	6	5	48	22	40	-2.72729	1.78517	29.4041	5.87537e-08	1.0668e-05
chr8:131118621:131119037	16	2	4	78	25	47	-2.94751	2.15502	29.3998	5.88845e-08	1.0668e-05
chr13:55632298:55632475	1	0	1	35	16	6	-4.82669	0.872206	29.3623	6.00341e-08	1.07597e-05
chr3:84264656:84265400	52	8	19	172	65	151	-2.49244	3.5132	29.3611	6.0073e-08	1.07597e-05
chr6:145084254:145084699	18	1	10	51	49	64	-2.7552	2.36728	29.3573	6.0188e-08	1.07597e-05
chr8:81849259:81849812	34	7	9	94	36	175	-2.68101	3.05589	29.3601	6.01023e-08	1.07597e-05
chr4:65064296:65064557	4	4	0	34	16	25	-3.26635	1.2397	29.3403	6.072e-08	1.0819e-05
chr13:76547864:76548494	41	13	17	93	52	191	-2.30083	3.28046	29.3253	6.11922e-08	1.08673e-05
chr11:5746524:5747227	51	17	16	130	64	160	-2.19961	3.42634	29.3063	6.17929e-08	1.09315e-05
chr14:104233860:104234287	14	4	1	44	19	78	-2.94052	1.9939	29.3012	6.19587e-08	1.09315e-05
chr13:112874444:112875362	53	27	30	160	65	251	-2.10857	3.80203	29.279	6.26727e-08	1.10214e-05
chr12:16128533:16128849	10	2	3	49	10	75	-3.13986	1.86614	29.187	6.5718e-08	1.1509e-05
chr8:116542240:116542748	13	8	5	87	24	57	-2.73211	2.32053	29.1825	6.58718e-08	1.1509e-05
chr3:144062406:144063815	161	67	64	342	191	585	-2.00496	5.06704	29.1738	6.61674e-08	1.15234e-05
chr9:32327016:32327672	37	15	17	132	49	117	-2.2019	3.18955	29.0833	6.93327e-08	1.20358e-05
chr12:56572308:56572596	6	2	3	35	14	32	-2.93286	1.33057	29.0363	7.1035e-08	1.22525e-05
chr17:56258918:56260258	70	17	26	158	78	246	-2.21563	3.82434	29.0384	7.09595e-08	1.22525e-05
chr6:126946241:126946677	15	0	8	53	24	63	-2.74285	2.05253	29.0219	7.1563e-08	1.23043e-05
chrX:12921785:12922344	10	4	12	47	29	61	-2.46391	2.09712	28.9531	7.41531e-08	1.27091e-05
chr18:38914053:38914706	30	6	15	64	47	199	-2.65779	3.08997	28.9106	7.57957e-08	1.29414e-05
chr4:55830969:55831325	9	4	4	33	40	37	-2.90607	1.85707	28.9057	7.59879e-08	1.29414e-05
chr18:68988621:68989317	33	13	17	110	51	97	-2.15449	3.02664	28.8731	7.728e-08	1.31201e-05
chr10:79543173:79543541	10	0	6	33	23	44	-2.78539	1.63548	28.8213	7.93744e-08	1.34334e-05
chr10:75137833:75138402	19	3	12	58	44	63	-2.4782	2.39561	28.8054	8.00287e-08	1.34954e-05
chr5:20551314:20551535	5	2	4	38	23	23	-3.06664	1.44259	28.8003	8.02407e-08	1.34954e-05
chr7:77693888:77694192	6	1	2	43	15	22	-3.26241	1.31243	28.785	8.08735e-08	1.35596e-05
chr18:64778256:64779181	37	19	32	123	67	140	-1.97922	3.39796	28.7114	8.40085e-08	1.40416e-05
chr18:69844300:69844675	17	6	6	46	25	89	-2.50428	2.23343	28.6837	8.52176e-08	1.41998e-05
chr1:154133932:154134179	5	1	1	14	18	35	-3.33355	1.06776	28.6525	8.66011e-08	1.43418e-05
chr9:114714016:114714798	70	30	26	162	88	245	-2.05176	3.91305	28.6554	8.64745e-08	1.43418e-05
chr7:73058117:73058694	11	10	5	45	26	88	-2.57266	2.22916	28.587	8.95818e-08	1.479e-05
chr10:98872189:98872804	52	18	22	156	64	146	-2.11375	3.4995	28.561	9.07945e-08	1.4854e-05
chr11:89244949:89245614	21	8	4	90	74	50	-3.00052	2.7873	28.571	9.03245e-08	1.4854e-05
chr5:119505400:119505817	6	2	2	22	21	31	-3.00159	1.25522	28.5655	9.05831e-08	1.4854e-05
chr4:131474420:131475048	39	7	7	106	61	104	-2.60697	3.0389	28.4988	9.3755e-08	1.5292e-05
chr2:93107739:93108667	103	19	47	248	146	273	-2.20976	4.36694	28.4881	9.42766e-08	1.53307e-05
chr17:36155989:36156279	12	7	0	60	36	44	-3.03525	2.11668	28.4792	9.471e-08	1.5355e-05
chr2:52777050:52777522	35	15	12	77	59	128	-2.20455	3.04021	28.4453	9.63822e-08	1.55793e-05
chr9:60079893:60080402	19	4	3	70	56	43	-3.03053	2.43409	28.4273	9.72839e-08	1.56781e-05
chr12:31937101:31937421	8	4	4	30	17	56	-2.69437	1.63473	28.3871	9.93249e-08	1.59594e-05
chr10:85595243:85595704	14	0	5	44	33	41	-2.89272	1.89387	28.3696	1.00229e-07	1.60569e-05
chr16:80587517:80587830	19	4	4	70	31	51	-2.6815	2.22445	28.3452	1.015e-07	1.62123e-05
chr2:158131565:158132685	131	69	48	346	169	486	-2.05566	4.90973	28.3038	1.0369e-07	1.65133e-05
chr1:154419967:154420394	21	12	6	96	34	79	-2.48331	2.65663	28.2838	1.04771e-07	1.66364e-05
chr5:148457718:148458288	20	6	11	51	48	69	-2.36547	2.44551	28.2551	1.06336e-07	1.68354e-05
chr2:116561460:116561967	42	6	9	92	64	128	-2.56387	3.09194	28.238	1.07279e-07	1.6935e-05
chr9:103591908:103592568	25	12	2	158	66	77	-3.13076	3.15945	28.2054	1.09102e-07	1.71726e-05
chr10:79268035:79268880	52	24	19	131	64	273	-2.30072	3.72671	28.1315	1.13346e-07	1.77679e-05
chr3:41068564:41068996	15	8	7	59	24	68	-2.36874	2.20832	28.1281	1.13542e-07	1.77679e-05
chr1:138022796:138023155	14	4	9	56	35	45	-2.50062	2.1352	28.1225	1.13877e-07	1.77688e-05
chr2:166943388:166944128	51	21	26	246	130	107	-2.53371	3.95129	28.0691	1.17059e-07	1.82126e-05
chr13:52916797:52917411	41	14	26	97	56	170	-2.06025	3.29622	27.9821	1.22443e-07	1.89412e-05
chr2:33031995:33032377	12	3	4	60	32	30	-2.89841	1.95803	27.9858	1.22206e-07	1.89412e-05
chr9:106304993:106305329	5	0	4	22	16	31	-3.01802	1.1301	27.9567	1.24064e-07	1.9137e-05
chr4:117465900:117466160	4	0	2	9	19	46	-3.66775	1.14396	27.9378	1.25277e-07	1.92691e-05
chr15:39852069:39852506	16	2	6	82	15	79	-2.93701	2.28339	27.8949	1.28087e-07	1.96454e-05
chr8:11394764:11395121	8	5	0	37	15	45	-2.91684	1.54386	27.8704	1.2972e-07	1.98324e-05
chr9:65389309:65390377	51	13	21	130	73	125	-2.14447	3.38124	27.8656	1.30041e-07	1.98324e-05
chr15:94412419:94412800	8	2	3	18	21	64	-3.02851	1.59698	27.8422	1.31625e-07	2.00174e-05
chr2:93801661:93802428	56	24	16	157	71	182	-2.18891	3.63266	27.8289	1.32533e-07	2.00988e-05
chr14:48603136:48603319	7	0	0	28	17	20	-3.39755	1.05542	27.7273	1.39679e-07	2.09551e-05
chr3:98310065:98310760	27	3	5	127	110	48	-3.5096	3.18769	27.7265	1.39732e-07	2.09551e-05
chr4:55762720:55763397	66	25	21	144	79	250	-2.15617	3.80921	27.7293	1.39533e-07	2.09551e-05
chr8:8307489:8307992	22	3	11	56	29	156	-2.77494	2.70019	27.7412	1.38681e-07	2.09551e-05
chr6:143567144:143567412	7	3	1	20	16	52	-3.01297	1.39144	27.6997	1.41686e-07	2.11893e-05
chr6:136875530:136875989	25	7	5	43	58	110	-2.70805	2.67748	27.6207	1.47593e-07	2.20117e-05
chr18:69941600:69942350	37	10	15	92	41	137	-2.2093	3.00559	27.6008	1.4912e-07	2.21782e-05
chr8:37748081:37748362	4	1	4	38	17	20	-3.15885	1.2629	27.5798	1.50748e-07	2.23588e-05
chr13:94384422:94385029	33	18	10	94	49	132	-2.22475	3.06168	27.5463	1.53375e-07	2.2624e-05
chr8:37222136:37222551	9	2	6	40	30	31	-2.75969	1.72441	27.5502	1.53067e-07	2.2624e-05
chr15:66918756:66920116	126	53	80	299	163	334	-1.73193	4.7027	27.5393	1.53939e-07	2.26453e-05
chr1:156649338:156650113	35	8	15	60	64	147	-2.38406	3.0382	27.5166	1.55754e-07	2.27266e-05
chr13:83721819:83722031	11	1	2	28	17	49	-2.84962	1.5004	27.5206	1.55427e-07	2.27266e-05
chr8:74036992:74037234	8	4	2	43	24	27	-2.8877	1.5983	27.5266	1.54947e-07	2.27266e-05
chr11:72300517:72301023	22	12	11	82	32	88	-2.20626	2.63533	27.4918	1.57763e-07	2.28614e-05
chr12:112624532:112625593	127	30	75	269	215	346	-2.06807	4.7393	27.4853	1.58292e-07	2.28614e-05
chr17:31582173:31582664	18	0	6	84	30	50	-3.0131	2.28112	27.496	1.57423e-07	2.28614e-05
chr4:133822157:133822407	5	0	2	30	15	18	-3.29692	1.02239	27.4843	1.58372e-07	2.28614e-05
chr8:12887816:12888113	9	1	7	34	16	57	-2.69055	1.67272	27.4684	1.59678e-07	2.29886e-05
chr3:116094267:116094641	6	1	0	26	6	55	-3.56859	1.25778	27.4499	1.61217e-07	2.31483e-05
chr2:75060939:75061344	21	9	4	46	53	83	-2.59857	2.51686	27.4295	1.6293e-07	2.33323e-05
chr2:30460324:30460821	6	3	8	62	10	75	-3.01694	2.01373	27.4022	1.65239e-07	2.36004e-05
chr7:130511273:130511663	16	8	7	42	28	96	-2.434	2.29916	27.3817	1.67006e-07	2.37897e-05
chr9:118541899:118542273	14	4	5	34	33	52	-2.53586	1.93374	27.3746	1.67622e-07	2.38146e-05
chr11:106921021:106921251	32	31	17	1	0	7	3.35657	1.29093	27.364	1.68538e-07	2.38819e-05
chr11:36177952:36178360	17	3	5	69	40	37	-2.81216	2.21843	27.2567	1.78154e-07	2.51444e-05
chr12:21574271:21574834	22	7	2	61	28	118	-2.79628	2.52485	27.2492	1.78845e-07	2.51444e-05
chr5:122963962:122964470	25	4	12	54	46	84	-2.35625	2.53409	27.2536	1.7844e-07	2.51444e-05
chr9:67108585:67109197	29	11	14	137	62	66	-2.48884	3.07131	27.2218	1.81402e-07	2.54378e-05
chr1:121116398:121116797	16	3	4	48	39	40	-2.72738	2.04186	27.2048	1.83007e-07	2.55302e-05
chr16:30735308:30735719	14	4	6	32	27	69	-2.50279	1.97215	27.2061	1.82885e-07	2.55302e-05
chr19:55319099:55319749	49	14	42	140	83	173	-2.04061	3.64219	27.1794	1.85422e-07	2.55372e-05
chr2:35891004:35891535	20	6	4	108	39	46	-2.89078	2.55403	27.1803	1.85334e-07	2.55372e-05
chr3:52546458:52547038	20	5	3	68	20	92	-2.74818	2.33811	27.1977	1.83677e-07	2.55372e-05
chr7:144411498:144411659	2	0	1	5	18	32	-4.19438	0.783832	27.1796	1.854e-07	2.55372e-05
chr9:83450021:83450908	46	35	34	252	124	143	-2.27503	4.05748	27.1927	1.84148e-07	2.55372e-05
chr2:131890126:131890466	7	2	2	32	25	22	-3.03811	1.38114	27.1728	1.86058e-07	2.55596e-05
chr7:105651394:105651887	20	2	12	51	58	67	-2.65005	2.50374	27.1433	1.8892e-07	2.58868e-05
chr4:55155125:55155689	21	2	2	125	18	108	-3.46193	2.71096	27.1332	1.89909e-07	2.59565e-05
chr1:155071416:155071956	34	4	9	92	38	111	-2.53398	2.81173	27.119	1.9131e-07	2.60819e-05
chr18:39195918:39196431	18	5	5	75	32	45	-2.62177	2.24849	27.1034	1.92857e-07	2.62266e-05
chr11:85769471:85769769	13	4	2	36	17	75	-2.77713	1.87544	27.0792	1.95287e-07	2.64222e-05
chr12:55287982:55289406	95	52	53	277	131	267	-1.83374	4.44343	27.0805	1.95152e-07	2.64222e-05
chr7:80815599:80815836	2	2	4	25	11	31	-3.0349	1.06988	27.0745	1.95763e-07	2.64222e-05
chr2:127154159:127154503	9	2	0	27	13	45	-3.00457	1.34057	27.0638	1.96849e-07	2.65025e-05
chr13:107536761:107537096	5	5	0	45	32	20	-3.43565	1.65002	27.0455	1.98725e-07	2.66222e-05
chr13:13472911:13473332	10	2	8	59	39	29	-2.90197	2.04466	27.0471	1.98557e-07	2.66222e-05
chr17:46023079:46023799	49	37	21	159	117	177	-2.1749	3.86546	26.9587	2.07854e-07	2.77763e-05
chr9:50534235:50534596	4	0	13	55	44	44	-3.23535	2.15783	26.9303	2.10926e-07	2.81173e-05
chr4:63523166:63523476	18	3	6	69	28	47	-2.59554	2.15782	26.9211	2.1193e-07	2.81815e-05
chr14:32250129:32250377	5	0	0	23	15	15	-3.54993	0.802311	26.905	2.13702e-07	2.82087e-05
chr7:80801697:80802831	85	47	33	368	129	238	-2.24438	4.48964	26.9083	2.13337e-07	2.82087e-05
chr9:46004824:46005354	25	4	17	85	45	75	-2.33484	2.69094	26.9063	2.13557e-07	2.82087e-05
chr7:106250267:106250580	10	4	3	55	26	28	-2.84201	1.79801	26.8815	2.16316e-07	2.8484e-05
chr7:71502362:71502764	11	2	13	65	33	46	-2.61256	2.18351	26.8636	2.1833e-07	2.86793e-05
chr14:104212485:104212778	13	4	3	41	24	42	-2.55668	1.76671	26.8533	2.19495e-07	2.87624e-05
chr10:87487619:87487825	2	2	0	24	22	10	-3.93967	0.923398	26.8414	2.20857e-07	2.88707e-05
chr12:76551028:76551505	28	9	11	78	39	80	-2.16981	2.63897	26.8027	2.25324e-07	2.93127e-05
chr8:81825408:81825819	19	8	7	78	23	74	-2.41209	2.38759	26.8056	2.24987e-07	2.93127e-05
chr8:95283786:95284033	9	0	2	44	20	22	-3.1844	1.43556	26.7725	2.28868e-07	2.97022e-05
chr3:155794564:155795025	30	7	19	115	64	72	-2.39018	3.01367	26.7626	2.30052e-07	2.97843e-05
chr10:84109376:84109669	10	4	2	27	19	53	-2.68372	1.59841	26.755	2.30949e-07	2.98289e-05
chr1:154346824:154347205	11	1	2	47	26	25	-3.05611	1.64041	26.7424	2.3246e-07	2.99227e-05
chr8:113195856:113196379	26	11	12	71	46	77	-2.12199	2.6587	26.7397	2.32784e-07	2.99227e-05
chr1:170173917:170174398	22	7	3	94	45	51	-2.79812	2.5596	26.7127	2.36064e-07	3.02723e-05
chr18:14069981:14070379	16	4	6	48	20	65	-2.42654	2.00742	26.6376	2.45422e-07	3.13977e-05
chr1:133274518:133275514	42	38	18	230	133	148	-2.47444	4.01741	26.5682	2.544e-07	3.24694e-05
chr11:81858994:81859319	12	5	3	35	23	48	-2.50171	1.74629	26.5109	2.62061e-07	3.33683e-05
chr10:37002749:37003132	11	6	4	34	18	116	-2.90859	2.18079	26.4744	2.67059e-07	3.38912e-05
chr17:28166192:28166849	48	10	21	97	86	125	-2.21315	3.31724	26.4686	2.67855e-07	3.38912e-05
chr4:116127740:116128323	56	25	20	133	103	144	-2.09802	3.6405	26.4672	2.68051e-07	3.38912e-05
chr5:31772035:31772973	70	18	15	157	95	183	-2.29741	3.7402	26.4555	2.69675e-07	3.40169e-05
chr5:12944506:12944885	20	3	8	41	28	111	-2.61047	2.35808	26.4355	2.72481e-07	3.42907e-05
chr10:68716876:68717603	62	30	36	164	117	156	-1.93807	3.87452	26.3898	2.79017e-07	3.50316e-05
chr9:32713668:32714420	53	11	15	139	84	112	-2.35875	3.40937	26.3741	2.81288e-07	3.52347e-05
chr11:68054958:68055372	14	8	6	41	25	74	-2.34734	2.10323	26.3504	2.84755e-07	3.54224e-05
chr2:167640542:167641108	22	3	6	56	22	122	-2.74924	2.451	26.3575	2.83715e-07	3.54224e-05
chr6:126931449:126932199	46	8	6	74	86	235	-2.93601	3.46388	26.3535	2.84307e-07	3.54224e-05
chr4:118791930:118792188	6	3	3	14	22	69	-3.12236	1.61193	26.3137	2.90219e-07	3.60191e-05
chr15:63849994:63850367	16	0	6	56	26	45	-2.74287	1.96471	26.3006	2.92205e-07	3.61825e-05
chr19:37581037:37581444	9	6	7	44	42	36	-2.65123	2.03229	26.2913	2.93614e-07	3.62738e-05
chr4:149249353:149249880	24	16	6	93	43	90	-2.35779	2.80003	26.2803	2.95286e-07	3.6397e-05
chr8:122409429:122409845	29	8	12	64	35	118	-2.22263	2.69838	26.2593	2.98517e-07	3.67114e-05
chr1:62770892:62771721	34	26	6	230	116	115	-2.93389	3.81306	26.2534	2.99432e-07	3.67402e-05
chr1:137022926:137023357	15	4	6	43	17	105	-2.70492	2.18852	26.2425	3.01125e-07	3.68642e-05
chr11:107196202:107197348	108	47	65	233	153	275	-1.72084	4.46436	26.2238	3.04053e-07	3.71385e-05
chr5:149976499:149976781	4	6	1	31	13	40	-2.87985	1.36816	26.2072	3.06674e-07	3.73741e-05
chr8:81905643:81906150	24	9	3	60	32	121	-2.61821	2.59933	26.2026	3.07416e-07	3.73801e-05
chr6:86520545:86521235	46	13	8	120	53	149	-2.40704	3.24221	26.1923	3.09045e-07	3.74938e-05
chr3:52751981:52752414	13	0	4	61	21	34	-2.97873	1.81691	26.1615	3.1402e-07	3.80119e-05
chr6:115163160:115163531	10	5	10	48	17	77	-2.46974	2.06119	26.1094	3.22608e-07	3.89641e-05
chr10:124598126:124598476	14	3	7	33	21	99	-2.68307	2.11084	26.0987	3.24398e-07	3.90928e-05
chr17:31521690:31522566	90	37	43	253	119	206	-1.90937	4.2267	26.057	3.31482e-07	3.9769e-05
chr2:169029576:169030014	23	3	8	39	42	95	-2.55406	2.41344	26.0602	3.3093e-07	3.9769e-05
chr12:45960390:45960939	39	10	9	65	63	144	-2.40727	3.04001	26.0069	3.40193e-07	4.06335e-05
chr9:67114725:67114957	9	1	1	25	21	28	-2.93782	1.26328	26.01	3.39658e-07	4.06335e-05
chr12:103770429:103771350	55	14	26	114	78	141	-1.99841	3.42775	25.9795	3.45067e-07	4.10343e-05
chr17:84630771:84631078	4	4	3	41	20	21	-2.97777	1.41433	25.9795	3.45069e-07	4.10343e-05
chr7:81669096:81669910	55	21	9	122	83	212	-2.42153	3.62056	25.9701	3.4675e-07	4.11436e-05
chr11:107176865:107177194	13	0	0	31	17	83	-3.4543	1.82063	25.9602	3.48529e-07	4.1264e-05
chr6:32402972:32403529	10	3	8	40	14	131	-3.02888	2.26665	25.9446	3.51358e-07	4.1508e-05
chr1:155577478:155578362	134	43	45	247	169	339	-1.94778	4.58765	25.9158	3.56641e-07	4.15936e-05
chr11:62743190:62743665	23	4	9	67	27	72	-2.33372	2.34128	25.9154	3.56706e-07	4.15936e-05
chr12:3906578:3906912	6	6	2	69	19	28	-3.08051	1.82232	25.9236	3.55194e-07	4.15936e-05
chr15:77738212:77738789	23	3	3	56	29	73	-2.63133	2.23596	25.9206	3.5576e-07	4.15936e-05
chr16:5953258:5953656	18	4	4	58	50	38	-2.8069	2.26141	25.9213	3.55628e-07	4.15936e-05
chr9:118625131:118625631	16	6	7	36	29	74	-2.33852	2.10982	25.9168	3.56456e-07	4.15936e-05
chr13:63024572:63024997	16	2	4	52	25	41	-2.6175	1.88905	25.9025	3.59096e-07	4.16922e-05
chr5:30374454:30375026	24	5	11	46	35	162	-2.63804	2.74305	25.9053	3.58575e-07	4.16922e-05
chr18:80813863:80814785	116	41	32	241	138	335	-2.05794	4.4532	25.8848	3.62418e-07	4.18771e-05
chr2:5056406:5056680	11	2	2	38	23	29	-2.7778	1.53844	25.8816	3.63016e-07	4.18771e-05
chr5:20794433:20795127	35	15	5	85	58	131	-2.44143	3.04649	25.8896	3.61516e-07	4.18771e-05
chr6:71685108:71685500	11	5	0	29	19	78	-2.98059	1.83763	25.8543	3.68176e-07	4.23818e-05
chr8:66684104:66684745	35	11	13	83	44	100	-2.07327	2.84056	25.8501	3.6899e-07	4.23851e-05
chr2:33353784:33354178	8	8	16	74	44	55	-2.50584	2.47497	25.8451	3.69946e-07	4.24048e-05
chr2:32369861:32370215	20	3	0	38	41	121	-3.31001	2.46422	25.8144	3.75874e-07	4.2993e-05
chr1:158916432:158916659	9	1	2	30	13	35	-2.78921	1.27633	25.7762	3.83379e-07	4.37587e-05
chr3:129352877:129353410	18	9	10	48	34	73	-2.14662	2.31522	25.7708	3.84464e-07	4.37899e-05
chr15:43446433:43446922	16	8	6	39	29	76	-2.31938	2.15939	25.7602	3.86576e-07	4.39378e-05
chr11:117124347:117125062	53	16	25	131	66	131	-1.95551	3.39606	25.6995	3.98926e-07	4.51306e-05
chr12:119425020:119425307	11	3	4	27	29	41	-2.60119	1.66482	25.6964	3.99578e-07	4.51306e-05
chr9:32313633:32314430	88	20	47	234	110	211	-2.02834	4.12956	25.7005	3.98715e-07	4.51306e-05
chr2:32583895:32584493	35	10	22	93	44	115	-2.00893	2.97937	25.6674	4.05614e-07	4.57167e-05
chr4:97340432:97340977	23	10	18	78	29	145	-2.27056	2.8545	25.6632	4.06502e-07	4.57213e-05
chr6:52036220:52036686	14	9	11	103	43	43	-2.59787	2.58692	25.6249	4.14653e-07	4.65412e-05
chr2:34838347:34838774	16	2	6	59	21	47	-2.54812	1.96441	25.6175	4.16249e-07	4.66233e-05
chr9:67690663:67690951	6	1	0	41	21	12	-3.63167	1.2511	25.5738	4.25773e-07	4.75914e-05
chr10:79570207:79570867	60	18	18	145	63	167	-2.09833	3.51669	25.5551	4.29929e-07	4.78823e-05
chr8:122425941:122426299	13	0	5	38	24	38	-2.67696	1.66608	25.5541	4.30149e-07	4.78823e-05
chr13:108361645:108361912	10	0	1	21	16	43	-2.99122	1.28104	25.5185	4.38151e-07	4.85727e-05
chr3:52187140:52187776	106	30	36	340	146	204	-2.23614	4.4387	25.5205	4.37711e-07	4.85727e-05
chr15:97276586:97277189	32	7	3	120	75	65	-2.9769	3.01904	25.4702	4.4928e-07	4.97043e-05
chr7:105723322:105723636	11	2	4	42	20	32	-2.61524	1.59021	25.4054	4.64626e-07	5.1297e-05
chr3:144423552:144424110	46	23	18	129	73	119	-2.01658	3.38553	25.3996	4.66022e-07	5.13461e-05
chr7:89347849:89348315	19	5	14	40	39	104	-2.35058	2.47571	25.3813	4.70451e-07	5.17285e-05
chr5:137569463:137569966	6	8	7	46	16	71	-2.56148	1.97033	25.3734	4.72387e-07	5.18358e-05
chr9:53910780:53911052	10	0	1	31	10	45	-3.04477	1.3287	25.3455	4.79266e-07	5.24841e-05
chr16:18713085:18713463	11	2	3	26	14	90	-3.00467	1.82673	25.3281	4.83619e-07	5.28535e-05
chr5:136435801:136436112	9	2	2	31	24	25	-2.82099	1.40394	25.3199	4.85672e-07	5.29706e-05
chr16:4367663:4368199	11	5	9	29	26	87	-2.50802	2.07859	25.2914	4.92902e-07	5.34669e-05
chr8:123263253:123264082	48	18	22	123	67	115	-1.9459	3.31766	25.2979	4.91253e-07	5.34669e-05
chr9:50535194:50535665	12	6	10	59	21	55	-2.30709	2.07565	25.2903	4.93194e-07	5.34669e-05
chr5:76275865:76276457	25	8	12	49	43	91	-2.15152	2.54296	25.283	4.95043e-07	5.35599e-05
chr8:129331096:129331776	43	8	12	108	45	119	-2.27998	3.03283	25.2704	4.98285e-07	5.38028e-05
chr10:10021437:10021800	10	2	4	34	22	31	-2.60008	1.50833	25.2656	4.9955e-07	5.38317e-05
chr12:105499328:105499608	4	2	5	28	11	36	-2.7575	1.2254	25.2468	5.04421e-07	5.40331e-05
chr13:8201892:8202190	12	2	2	53	38	22	-3.14706	1.88046	25.252	5.03068e-07	5.40331e-05
chr9:14412822:14413387	97	25	54	240	122	226	-1.92266	4.24009	25.25	5.03604e-07	5.40331e-05
chr18:7640214:7640716	40	15	17	92	58	104	-1.96741	3.0537	25.2326	5.0815e-07	5.43248e-05
chr13:114640928:114641463	20	11	14	70	37	70	-2.0578	2.52706	25.207	5.14947e-07	5.49426e-05
chr14:62918862:62919102	8	0	2	24	15	28	-2.87587	1.10425	25.164	5.2657e-07	5.60719e-05
chr1:128340468:128341008	26	13	12	74	50	73	-2.09212	2.70571	25.1486	5.30778e-07	5.64088e-05
chr3:19566620:19567132	27	66	36	2	5	6	3.37376	2.04977	25.1209	5.38473e-07	5.71141e-05
chr18:56917936:56918726	46	11	11	98	50	141	-2.23579	3.11752	25.0807	5.49793e-07	5.82004e-05
chr7:78748047:78748632	27	7	3	76	49	64	-2.60835	2.57311	25.0671	5.53694e-07	5.84987e-05
chr6:60894017:60894446	22	9	3	38	46	149	-2.83843	2.7117	25.0445	5.60216e-07	5.90721e-05
chr19:28759022:28759365	14	2	0	25	24	80	-3.13923	1.86892	25.016	5.68571e-07	5.97198e-05
chr4:133812396:133812857	12	3	9	36	20	65	-2.3764	1.88829	25.0197	5.67484e-07	5.97198e-05
chr12:92906851:92907345	28	3	22	74	44	196	-2.61815	3.10875	25.0021	5.7268e-07	5.99183e-05
chr8:109726344:109726876	34	2	11	69	44	137	-2.59858	2.84327	25.0025	5.72552e-07	5.99183e-05
chr11:36794735:36795020	11	2	0	51	12	38	-3.06404	1.57269	24.8977	6.04548e-07	6.31302e-05
chr11:115803379:115803799	15	2	3	26	22	94	-2.89877	1.99128	24.8868	6.07987e-07	6.32447e-05
chr2:91867935:91868291	14	10	9	58	32	54	-2.20068	2.23453	24.8904	6.06824e-07	6.32447e-05
chr2:148457247:148457889	37	5	7	66	51	121	-2.50385	2.82916	24.8173	6.30287e-07	6.54383e-05
chr4:138945523:138945931	8	8	3	47	40	31	-2.79072	1.97584	24.8028	6.35056e-07	6.58069e-05
chr1:62749359:62750582	80	60	72	251	141	307	-1.74027	4.50912	24.7942	6.37884e-07	6.58868e-05
chr5:139860387:139860939	26	21	18	110	53	96	-2.03995	3.06541	24.7931	6.38267e-07	6.58868e-05
chr3:79903614:79903967	4	8	2	36	28	32	-2.82385	1.65472	24.7471	6.53661e-07	6.7347e-05
chr11:117180985:117181707	18	2	13	66	37	51	-2.42235	2.30428	24.7422	6.55318e-07	6.73891e-05
chr12:106764788:106765481	57	22	19	105	73	186	-2.00098	3.5028	24.7129	6.65384e-07	6.82942e-05
chr1:184157741:184158095	15	2	2	60	25	32	-2.85637	1.86765	24.6736	6.79091e-07	6.95688e-05
chr7:73941582:73942116	15	4	5	52	24	40	-2.42226	1.8949	24.6385	6.91552e-07	7.07112e-05
chr19:6571729:6572220	13	4	4	26	21	80	-2.62674	1.89408	24.6323	6.9379e-07	7.07941e-05
chr6:18367576:18368517	32	13	20	116	53	80	-2.07783	3.01789	24.629	6.94985e-07	7.07941e-05
chr1:155587253:155587588	24	5	6	57	26	79	-2.32945	2.29341	24.6192	6.98523e-07	7.08914e-05
chr7:126065932:126066364	14	10	6	46	22	93	-2.37833	2.24695	24.6191	6.98567e-07	7.08914e-05
chr5:99809282:99809531	7	5	3	22	25	40	-2.62507	1.5104	24.6022	7.0471e-07	7.13807e-05
chr2:169602719:169603211	29	5	8	77	27	97	-2.37748	2.56246	24.5879	7.09979e-07	7.17797e-05
chr12:90057124:90057981	39	14	5	80	68	135	-2.46508	3.10991	24.574	7.15109e-07	7.18944e-05
chr1:61094958:61095410	24	12	4	52	48	95	-2.4071	2.60232	24.5769	7.14018e-07	7.18944e-05
chr5:72657668:72658040	17	4	2	51	19	56	-2.56721	1.92523	24.5745	7.14927e-07	7.18944e-05
chr4:129255624:129256157	25	5	15	101	32	72	-2.31879	2.65248	24.5472	7.2511e-07	7.27644e-05
chr6:84979524:84980099	33	9	7	97	43	77	-2.33616	2.75825	24.5255	7.3331e-07	7.34507e-05
chr11:44343947:44344202	7	5	3	21	23	44	-2.6149	1.50433	24.4859	7.48575e-07	7.48408e-05
chr12:40679446:40679717	15	2	6	39	21	50	-2.38461	1.79065	24.4719	7.54015e-07	7.51066e-05
chr8:71077236:71077546	16	8	1	49	44	49	-2.71373	2.19844	24.4721	7.53945e-07	7.51066e-05
chr16:34937627:34938266	32	15	29	98	52	117	-1.8804	3.11	24.4638	7.57193e-07	7.52842e-05
chr5:97340504:97341179	49	11	23	140	61	111	-2.09693	3.30521	24.4594	7.58919e-07	7.53171e-05
chr1:158536110:158536432	9	4	5	23	29	44	-2.54502	1.65661	24.4495	7.62829e-07	7.54278e-05
chr16:38304836:38305327	22	4	6	53	39	51	-2.40255	2.21867	24.45	7.62621e-07	7.54278e-05
chr6:31519902:31520248	14	4	0	45	24	39	-2.76373	1.75809	24.4249	7.72633e-07	7.61983e-05
chrX:34514751:34515145	8	9	4	36	30	45	-2.46382	1.8655	24.4229	7.73444e-07	7.61983e-05
chr14:32217041:32217549	28	7	8	95	45	56	-2.41715	2.6446	24.4099	7.78693e-07	7.62307e-05
chr17:30632169:30632481	9	1	0	14	20	49	-3.18564	1.32352	24.4148	7.76686e-07	7.62307e-05
chr4:106360951:106361718	44	3	9	107	43	241	-2.95326	3.34774	24.4081	7.7942e-07	7.62307e-05
chr5:50426032:50426900	266	133	160	58	32	76	1.67617	4.12429	24.4138	7.77109e-07	7.62307e-05
chr13:100052864:100053413	22	12	11	55	31	132	-2.24921	2.67314	24.3982	7.83424e-07	7.64838e-05
chr9:22836415:22837150	35	14	20	80	48	109	-1.87662	2.94278	24.3821	7.90007e-07	7.69872e-05
chr14:49041578:49042053	27	4	11	96	61	49	-2.61506	2.74343	24.3468	8.04606e-07	7.82686e-05
chr15:10077788:10078047	6	1	0	57	17	11	-3.79517	1.38887	24.339	8.07866e-07	7.84444e-05
chr1:167631059:167631724	20	14	9	85	33	72	-2.18642	2.58258	24.335	8.0953e-07	7.84649e-05
chr1:135814088:135814922	60	16	27	123	58	229	-2.06288	3.59234	24.3308	8.11325e-07	7.84979e-05
chr7:77490843:77491498	76	17	35	131	94	221	-1.97122	3.8069	24.3204	8.15692e-07	7.87792e-05
chr1:34345837:34346124	6	2	5	37	12	31	-2.66025	1.33712	24.2972	8.25576e-07	7.95914e-05
chr16:77346239:77346720	22	12	8	63	26	129	-2.3376	2.64472	24.2824	8.31949e-07	8.00628e-05
chr7:28080969:28081303	16	5	2	48	28	41	-2.52882	1.90964	24.2608	8.4133e-07	8.08216e-05
chr10:3200236:3200885	43	10	21	93	75	99	-2.09391	3.14783	24.2482	8.46871e-07	8.12093e-05
chr1:182293926:182294599	81	46	26	221	130	225	-2.02647	4.20663	24.2186	8.59999e-07	8.21315e-05
chr18:13829892:13830440	26	12	8	56	36	108	-2.17415	2.61296	24.2162	8.61051e-07	8.21315e-05
chr8:119851282:119851749	18	8	2	37	30	131	-2.82242	2.4502	24.2214	8.58716e-07	8.21315e-05
chr8:66876728:66877361	19	18	15	58	47	147	-2.2236	2.92126	24.2002	8.68228e-07	8.267e-05
chr16:31472245:31472542	12	0	2	28	15	44	-2.76908	1.40545	24.1216	9.04402e-07	8.59628e-05
chr13:13452201:13452797	21	10	9	126	60	40	-2.71462	2.85881	24.1052	9.1212e-07	8.6544e-05
chr15:59511402:59512787	193	96	114	419	199	634	-1.65881	5.29905	24.0759	9.26108e-07	8.74103e-05
chr1:92336418:92337458	48	6	11	93	51	171	-2.45754	3.17624	24.0796	9.24347e-07	8.74103e-05
chr8:125665795:125666408	26	7	13	64	31	84	-2.05881	2.49195	24.0782	9.25028e-07	8.74103e-05
chr6:93264239:93265044	21	15	13	104	46	64	-2.21582	2.79264	24.0681	9.29863e-07	8.76116e-05
chr17:9060645:9060943	8	1	2	28	16	24	-2.7706	1.15649	24.0622	9.32735e-07	8.7729e-05
chr12:97372373:97372810	14	7	6	30	32	66	-2.33559	2.03166	24.0534	9.36983e-07	8.79754e-05
chr2:30491777:30492178	18	1	2	70	22	44	-2.92738	2.01741	24.046	9.40591e-07	8.81608e-05
chr11:115604648:115605002	15	3	5	63	20	39	-2.55078	1.92351	24.0362	9.45411e-07	8.84587e-05
chr7:100099166:100099724	48	22	28	136	98	108	-2.00078	3.53912	24.0329	9.47047e-07	8.84587e-05
chr10:95347852:95349421	114	64	36	245	203	360	-2.03974	4.69345	24.0247	9.51059e-07	8.86801e-05
chr2:157954321:157954742	17	4	9	46	18	104	-2.48077	2.2499	24.0206	9.53084e-07	8.87157e-05
chr17:6953396:6953906	21	6	4	44	42	56	-2.42476	2.21359	23.9896	9.68565e-07	8.99171e-05
chr6:146881499:146882149	80	32	21	204	102	194	-2.06508	3.9786	23.9881	9.69322e-07	8.99171e-05
chr17:84384600:84385148	33	6	12	115	51	63	-2.41695	2.85912	23.978	9.74414e-07	9.00799e-05
chr7:139914583:139914968	15	6	12	47	26	64	-2.11665	2.133	23.9787	9.74066e-07	9.00799e-05
chr6:145069098:145069849	86	23	56	252	135	184	-2.00522	4.22464	23.9668	9.80115e-07	9.0452e-05
chr1:121130753:121131423	23	2	4	111	48	37	-3.11298	2.59104	23.9222	1.00308e-06	9.22562e-05
chr13:94317557:94318052	30	9	11	63	31	153	-2.32591	2.81084	23.9254	1.00141e-06	9.22562e-05
chr16:32127063:32127527	27	8	17	70	33	95	-2.00641	2.63396	23.9142	1.00725e-06	9.2482e-05
chr9:45175894:45177054	161	60	58	278	169	534	-1.89685	4.89674	23.8845	1.02293e-06	9.37621e-05
chr17:29705517:29705886	13	0	2	28	14	69	-2.97759	1.64715	23.8797	1.0255e-06	9.38381e-05
chr4:41580134:41580401	11	1	2	25	20	34	-2.66983	1.35269	23.8693	1.03103e-06	9.41851e-05
chr8:66682992:66683387	25	17	7	99	33	108	-2.28837	2.84014	23.8477	1.04266e-06	9.50861e-05
chr10:82631132:82631605	18	2	2	33	22	85	-2.78995	1.99883	23.8428	1.04533e-06	9.51687e-05
chr9:14400929:14401232	7	3	2	27	20	24	-2.70137	1.25215	23.8295	1.05254e-06	9.56644e-05
chr10:6292488:6292717	8	2	0	28	8	41	-2.95563	1.19617	23.8162	1.05989e-06	9.61673e-05
chr9:89588496:89588823	15	3	1	63	30	29	-2.94769	1.94356	23.813	1.06164e-06	9.61673e-05
chr9:119472676:119473093	11	4	3	39	10	74	-2.72904	1.7941	23.7753	1.08263e-06	9.79044e-05
chr3:53025258:53025967	78	44	57	20	4	15	2.15665	2.45406	23.7232	1.11233e-06	0.000100423
chr9:116020603:116021061	18	10	8	61	26	64	-2.12292	2.26514	23.6926	1.13015e-06	0.000101861
chr6:120040834:120041343	48	16	16	104	45	184	-2.10951	3.28962	23.6796	1.1378e-06	0.000102379
chr9:115715144:115715393	5	0	4	12	16	42	-3.00863	1.1184	23.6551	1.15241e-06	0.000103521
chr15:54667183:54668000	72	21	24	139	86	166	-1.92691	3.65817	23.6461	1.1578e-06	0.000103832
chr18:66922783:66923381	33	6	1	86	42	143	-2.94084	2.90427	23.6306	1.16716e-06	0.000104498
chr4:105617573:105617885	6	0	5	25	17	25	-2.73399	1.14827	23.627	1.16936e-06	0.000104522
chr1:164318703:164319222	29	7	13	66	52	67	-2.14504	2.62493	23.5762	1.2006e-06	0.000107049
chr16:72804550:72804708	8	1	0	51	47	10	-4.03535	1.82764	23.5747	1.20159e-06	0.000107049
chr8:125026933:125027316	12	1	10	52	20	44	-2.44762	1.86157	23.5684	1.20552e-06	0.000107221
chr3:95097377:95097963	42	7	12	96	43	110	-2.20988	2.92573	23.5595	1.21109e-06	0.00010754
chr5:125195414:125195818	32	8	16	100	31	99	-2.12944	2.80622	23.517	1.23817e-06	0.000109584
chr7:20319496:20319897	18	0	3	28	29	93	-3.02858	2.0848	23.5193	1.23664e-06	0.000109584
chr5:70043984:70044288	3	8	1	27	30	34	-2.95758	1.58076	23.502	1.24787e-06	0.000110262
chr11:100588502:100589005	16	12	4	84	64	41	-2.77207	2.64234	23.4871	1.25752e-06	0.000110933
chr16:42746090:42746713	23	10	2	54	38	84	-2.45195	2.43409	23.4633	1.27316e-06	0.00011213
chr15:61271866:61272252	14	6	3	72	26	33	-2.65959	2.04698	23.4571	1.27729e-06	0.00011231
chr19:42082699:42083194	22	13	10	71	38	66	-2.05482	2.52268	23.4398	1.28883e-06	0.00011314
chr12:3870842:3871420	18	6	13	54	28	63	-2.06035	2.22893	23.3769	1.33168e-06	0.000116712
chr18:8650839:8651147	7	4	0	26	11	37	-2.75774	1.20318	23.3529	1.34843e-06	0.000117989
chr1:59954759:59955015	14	46	27	3	3	0	3.83392	1.50491	23.3234	1.36927e-06	0.000119618
chr1:36327369:36327864	19	7	4	70	21	58	-2.40028	2.18531	23.3131	1.37658e-06	0.000120063
chr13:45539992:45540327	11	1	0	20	18	42	-2.89279	1.30858	23.2801	1.4004e-06	0.000121943
chr10:117376189:117376568	13	3	2	28	30	36	-2.61459	1.63929	23.2659	1.41079e-06	0.00012265
chr14:87555494:87555827	18	2	6	34	28	57	-2.37212	1.91803	23.2581	1.41654e-06	0.000122952
chr17:91723600:91724106	24	5	7	86	33	49	-2.42826	2.40434	23.2292	1.43796e-06	0.000124611
chr10:110497686:110497989	10	4	4	32	21	34	-2.38932	1.52863	23.2217	1.44359e-06	0.000124869
chr10:21409454:21410211	53	21	42	149	87	135	-1.82268	3.63668	23.2078	1.45408e-06	0.000124869
chr10:42654491:42654891	8	6	7	40	20	40	-2.29576	1.70901	23.2068	1.45482e-06	0.000124869
chr16:62922073:62922361	10	4	3	29	29	30	-2.56582	1.57628	23.2149	1.44872e-06	0.000124869
chr4:107110696:107111311	34	2	7	51	73	114	-2.8257	2.86351	23.2177	1.44659e-06	0.000124869
chr9:63458676:63459128	8	2	5	30	16	32	-2.46725	1.35016	23.2074	1.45436e-06	0.000124869
chr6:21805892:21806191	11	2	1	37	15	30	-2.68936	1.37925	23.1857	1.4709e-06	0.000126049
chr1:189477381:189477577	7	0	1	28	15	16	-3.06987	0.966321	23.1565	1.49338e-06	0.000127773
chr9:14178819:14179166	14	2	5	21	23	129	-3.05129	2.20335	23.1499	1.49851e-06	0.000128009
chr14:34500283:34501322	185	115	116	409	267	516	-1.59071	5.32926	23.1402	1.50612e-06	0.000128456
chr13:35008524:35009020	16	3	13	59	26	53	-2.22687	2.13993	23.1026	1.53583e-06	0.000130577
chr17:73144748:73145043	8	2	0	14	15	50	-3.02813	1.24328	23.1034	1.53522e-06	0.000130577
chr9:65039515:65040287	30	12	6	71	43	82	-2.17592	2.64466	23.0975	1.53994e-06	0.00013072
chr8:14996619:14997068	19	5	7	87	28	41	-2.50125	2.28942	23.0799	1.55406e-06	0.000131712
chr15:79643999:79644481	24	17	3	70	57	103	-2.47419	2.83587	23.0532	1.57576e-06	0.000133133
chr2:122111501:122112335	61	24	20	108	70	220	-1.99506	3.59685	23.0559	1.57359e-06	0.000133133
chr11:20857948:20858646	47	14	25	110	67	104	-1.89344	3.2283	23.0474	1.5806e-06	0.000133333
chr16:57338700:57339573	47	13	15	68	78	144	-2.15804	3.21061	23.0408	1.58602e-06	0.000133582
chr19:11886526:11886711	12	2	0	31	22	30	-2.78617	1.42584	23.0335	1.592e-06	0.000133877
chr16:92423189:92424211	120	30	51	223	128	271	-1.81592	4.32617	23.0235	1.60037e-06	0.000134371
chr12:86434813:86435367	42	20	19	80	74	122	-1.91544	3.20451	23.0183	1.60463e-06	0.00013452
chr1:14001593:14001945	15	1	2	25	20	67	-2.77087	1.71964	23.0147	1.60771e-06	0.000134569
chr8:72898087:72898877	28	19	24	95	42	123	-1.87058	3.04193	23.0104	1.61128e-06	0.000134659
chr11:45923512:45924059	35	1	6	68	70	100	-2.89559	2.86098	22.9969	1.6226e-06	0.000135396
chr8:109295776:109296415	62	17	29	170	84	119	-2.00073	3.61087	22.9531	1.66004e-06	0.000138306
chr13:104283773:104284304	16	4	1	46	22	42	-2.55565	1.79069	22.9303	1.67985e-06	0.000139013
chr2:75405202:75405545	10	5	4	24	16	91	-2.71543	1.88286	22.9285	1.6814e-06	0.000139013
chr4:101390485:101390715	5	3	5	28	17	27	-2.54008	1.26602	22.9322	1.67819e-06	0.000139013
chr4:45448837:45449117	9	5	4	24	19	50	-2.40552	1.56446	22.9334	1.67713e-06	0.000139013
chr7:96936208:96936656	18	9	2	48	33	57	-2.38294	2.14432	22.9347	1.67603e-06	0.000139013
chr11:32304657:32305214	41	11	10	83	41	127	-2.13721	2.92629	22.9111	1.69672e-06	0.000139951
chr9:96724488:96724716	10	2	1	25	18	30	-2.6409	1.25727	22.9097	1.69793e-06	0.000139951
chr13:16926981:16927363	12	3	2	92	37	16	-3.37985	2.17646	22.8993	1.70718e-06	0.000140499
chr12:72964699:72965421	62	28	36	170	86	140	-1.78519	3.72675	22.8842	1.72064e-06	0.000141391
chr17:15205902:15206514	22	8	4	52	38	56	-2.28981	2.25451	22.8795	1.72484e-06	0.000141521
chr16:18712756:18713037	16	1	5	23	28	78	-2.70393	1.93957	22.8631	1.7396e-06	0.000142515
chr12:30053062:30053639	30	11	14	120	25	113	-2.25633	2.91293	22.8504	1.75113e-06	0.000143242
chr17:35889163:35889740	25	8	12	54	32	81	-1.98923	2.4199	22.8349	1.76532e-06	0.000143972
chr3:136985278:136985691	24	6	23	97	40	78	-2.13813	2.76966	22.8348	1.76538e-06	0.000143972
chr10:82159206:82159595	17	6	3	54	27	41	-2.39414	1.9797	22.8182	1.78074e-06	0.000144874
chr13:113176786:113177332	18	4	6	53	17	62	-2.31431	2.00462	22.817	1.7818e-06	0.000144874
chr11:107200567:107200977	24	4	3	39	48	68	-2.61593	2.30385	22.8013	1.79647e-06	0.000145585
chr4:44096657:44097150	51	9	19	96	62	123	-2.04336	3.16385	22.8046	1.79337e-06	0.000145585
chr6:84075021:84075390	10	8	4	41	29	36	-2.37931	1.82977	22.7989	1.79865e-06	0.000145585
chr1:71586817:71587071	38	22	18	4	0	8	2.65918	1.26542	22.7745	1.82171e-06	0.000147231
chr15:102007025:102007339	10	2	2	45	11	31	-2.72624	1.42587	22.7633	1.83234e-06	0.000147869
chr5:76409864:76410316	30	1	4	71	48	73	-2.80762	2.54898	22.7587	1.83667e-06	0.000147997
chr5:99816235:99816815	25	4	0	50	38	151	-3.20118	2.67784	22.6983	1.89538e-06	0.000152501
chr1:159310860:159311144	3	2	1	26	15	11	-3.22087	0.832073	22.6789	1.9146e-06	0.000153589
chr6:17980199:17980650	17	5	4	49	32	37	-2.39614	1.9685	22.6791	1.91442e-06	0.000153589
chr11:117169060:117169763	31	16	21	108	43	91	-1.90315	2.97265	22.6631	1.93039e-06	0.000153941
chr19:32372659:32373105	16	3	15	78	47	40	-2.5143	2.44049	22.6635	1.93e-06	0.000153941
chr6:38015738:38015985	2	0	8	16	20	42	-2.99088	1.29069	22.6652	1.92829e-06	0.000153941
chr7:96985983:96986865	113	32	52	190	110	368	-1.85713	4.34752	22.6634	1.93006e-06	0.000153941
chr11:89839419:89840212	62	22	29	111	72	168	-1.75492	3.51586	22.6523	1.94129e-06	0.000154581
chr4:81167332:81167723	13	0	6	23	20	94	-2.91149	1.92986	22.6308	1.96315e-06	0.000156092
chr3:31048542:31048969	31	17	23	73	51	114	-1.80883	2.9695	22.6182	1.976e-06	0.000156882
chr2:28020741:28021250	17	3	4	45	14	73	-2.51314	1.93832	22.6069	1.98767e-06	0.000157577
chr13:12708727:12709027	13	2	3	65	24	23	-2.87219	1.82522	22.6027	1.99205e-06	0.000157629
chr18:33703995:33704444	20	2	10	28	55	87	-2.6678	2.41744	22.5894	2.00584e-06	0.000157629
chr18:57189154:57189566	8	5	4	26	17	43	-2.37168	1.47368	22.6006	1.99424e-06	0.000157629
chr4:57852058:57852640	12	6	7	65	28	31	-2.44782	2.02076	22.5904	2.00485e-06	0.000157629
chr6:112636434:112637031	38	4	10	137	33	102	-2.57993	2.97019	22.5884	2.0069e-06	0.000157629
chr7:78645286:78645648	6	4	6	31	23	28	-2.46503	1.47592	22.5889	2.00641e-06	0.000157629
chr9:102603549:102603753	10	2	0	20	20	33	-2.77622	1.24581	22.5866	2.00876e-06	0.000157629
chr2:26436101:26436712	61	15	18	111	59	180	-2.03145	3.41193	22.5781	2.01774e-06	0.000158104
chr9:34768029:34768657	27	10	11	95	56	50	-2.29959	2.74479	22.5235	2.07585e-06	0.000162421
chr13:90884594:90885212	30	14	14	122	43	71	-2.14105	2.91477	22.5071	2.09373e-06	0.000163584
chr17:31216362:31216789	19	4	3	64	17	57	-2.52218	2.0433	22.5018	2.09949e-06	0.000163796
chr6:54006438:54007071	32	5	16	98	41	72	-2.18863	2.74366	22.4587	2.14706e-06	0.000167266
chr15:43456660:43456894	4	4	2	12	25	35	-2.93421	1.25225	22.4454	2.16206e-06	0.000167997
chr16:37754288:37755063	61	17	44	144	74	173	-1.80068	3.6548	22.4436	2.16406e-06	0.000167997
chr2:25552620:25552976	12	1	1	33	21	26	-2.75172	1.38621	22.4421	2.16578e-06	0.000167997
chr14:70915200:70915838	41	12	22	87	40	164	-1.99939	3.12117	22.4377	2.17076e-06	0.000168142
chr4:11788406:11788885	28	5	9	80	27	72	-2.23902	2.46005	22.4311	2.1782e-06	0.000168315
chr4:56064891:56065242	8	6	4	51	16	32	-2.49858	1.66042	22.4302	2.17922e-06	0.000168315
chr5:143759849:143760239	36	4	8	89	35	93	-2.38234	2.701	22.4159	2.19548e-06	0.000169328
chr1:164869110:164869393	12	3	4	24	29	39	-2.46912	1.62058	22.4094	2.20298e-06	0.000169664
chr18:61965572:61966139	28	2	3	52	30	145	-2.93767	2.60961	22.3844	2.23184e-06	0.000171642
chr14:122361399:122361625	5	3	1	23	18	18	-2.83965	1.01754	22.372	2.24626e-06	0.000172505
chr12:93014885:93015145	10	2	5	23	23	37	-2.43448	1.46321	22.3678	2.25118e-06	0.000172637
chr11:68077684:68078423	76	14	20	106	94	255	-2.24708	3.76143	22.3461	2.27672e-06	0.000174348
chr7:82517774:82518171	15	8	12	56	32	49	-2.07454	2.19796	22.3343	2.29078e-06	0.000175014
chrX:96094259:96094410	2	2	0	40	16	5	-4.00806	0.993067	22.3334	2.29189e-06	0.000175014
chr13:12729754:12730079	15	2	8	50	38	31	-2.52953	2.00052	22.3296	2.2964e-06	0.00017511
chr6:146890227:146890771	28	7	7	50	29	124	-2.33879	2.55488	22.3132	2.31614e-06	0.000176367
chr14:27991270:27992050	85	25	18	195	104	180	-2.12479	3.92002	22.3104	2.31946e-06	0.00017637
chr14:122385118:122385605	34	4	8	68	30	137	-2.47646	2.72834	22.307	2.32357e-06	0.000176435
chr18:62114274:62114801	15	3	6	25	21	104	-2.65894	2.07683	22.2759	2.36146e-06	0.00017906
chr8:11304038:11304559	23	4	6	49	32	54	-2.23973	2.13174	22.2513	2.39193e-06	0.000181116
chr13:46910231:46910544	13	4	2	36	19	37	-2.40393	1.57567	22.2464	2.39805e-06	0.000181325
chr1:171610379:171610895	17	6	3	72	36	31	-2.65198	2.17265	22.2388	2.40757e-06	0.00018179
chr11:19864862:19865227	15	10	3	43	30	54	-2.27055	2.04735	22.2219	2.42887e-06	0.000182887
chr14:27994514:27996024	91	43	77	288	153	216	-1.7772	4.46984	22.2231	2.42733e-06	0.000182887
chr10:95726152:95726372	6	2	3	27	8	34	-2.64645	1.11254	22.2096	2.44442e-06	0.000183802
chr12:109493810:109494061	12	0	3	31	14	37	-2.58976	1.36276	22.2009	2.45561e-06	0.000184382
chr19:34494837:34495353	34	4	12	72	32	111	-2.24406	2.67732	22.1983	2.45898e-06	0.000184382
chr19:46802326:46803094	34	12	13	53	45	170	-2.22473	2.97087	22.1847	2.47638e-06	0.000185173
chr2:163365265:163365666	14	2	5	20	22	117	-2.938	2.10882	22.1863	2.47438e-06	0.000185173
chr4:133844332:133844937	31	8	10	117	28	80	-2.32021	2.75649	22.1803	2.48213e-06	0.000185346
chr14:104215929:104216517	34	19	17	106	39	110	-1.89968	3.01219	22.1457	2.52716e-06	0.000188448
chr19:28820004:28820280	9	4	1	18	18	48	-2.64001	1.39507	22.1377	2.53772e-06	0.000188974
chr13:103667179:103667591	18	11	0	75	30	79	-2.7132	2.43673	22.1243	2.55552e-06	0.000189799
chr6:94121255:94121630	20	2	4	52	21	51	-2.43227	1.93949	22.1241	2.55583e-06	0.000189799
chr5:76544437:76545360	105	34	39	245	135	189	-1.8974	4.23976	22.1192	2.56234e-06	0.000190022
chr12:87429102:87429332	8	4	2	25	14	36	-2.4677	1.2794	22.1118	2.57218e-06	0.000190228
chr7:25373431:25373744	10	5	7	24	19	86	-2.50502	1.91416	22.114	2.56933e-06	0.000190228
chr17:86938922:86939707	61	8	10	94	90	177	-2.49549	3.44969	22.1065	2.57933e-06	0.000190496
chr1:62776008:62776560	22	15	5	158	45	57	-2.71965	2.9778	22.0409	2.66898e-06	0.000196688
chr8:109789784:109790262	21	0	8	37	30	89	-2.6049	2.20037	22.0399	2.67046e-06	0.000196688
chr14:27998396:27999659	67	47	25	308	161	151	-2.30388	4.33194	22.0338	2.67889e-06	0.000197041
chr2:138041369:138041669	18	3	5	32	23	64	-2.31818	1.88766	22.0266	2.68899e-06	0.000197515
chr6:142486890:142487378	12	2	12	37	19	72	-2.32536	1.9535	22.0141	2.70648e-06	0.00019826
chr9:32568171:32568703	20	10	3	34	37	132	-2.6383	2.53404	22.0153	2.70485e-06	0.00019826
chr16:76339429:76340092	42	15	13	88	47	108	-1.92241	2.96442	21.9869	2.74519e-06	0.000200823
chr12:40678439:40678951	31	15	21	73	39	124	-1.84182	2.89928	21.9835	2.75001e-06	0.000200903
chr7:130481862:130482454	24	4	12	70	36	52	-2.18794	2.36975	21.9638	2.77847e-06	0.000202708
chr3:7709015:7709386	18	0	2	25	29	93	-3.0889	2.05133	21.9276	2.83133e-06	0.000206286
chr11:53158790:53159215	15	6	5	47	22	42	-2.2047	1.86004	21.9235	2.83745e-06	0.000206453
chr1:175048785:175049545	47	25	18	184	101	88	-2.25299	3.6261	21.9107	2.85634e-06	0.000207397
chr9:37321154:37321494	23	2	4	57	22	63	-2.47308	2.09847	21.9095	2.85811e-06	0.000207397
chr9:83441568:83442314	56	36	41	138	97	166	-1.67946	3.77397	21.9052	2.86454e-06	0.000207585
chr2:36054036:36054455	16	10	10	59	34	48	-2.07892	2.24682	21.898	2.87537e-06	0.000208091
chr3:102934077:102934728	43	30	21	91	71	193	-1.92628	3.47625	21.885	2.89492e-06	0.000209225
chr1:17479297:17479901	18	18	4	71	43	84	-2.32492	2.63742	21.8638	2.92708e-06	0.000211266
chr10:98793279:98793489	11	1	0	24	18	29	-2.7649	1.20687	21.855	2.94051e-06	0.000211953
chr19:60149164:60149602	14	0	11	36	21	77	-2.49894	1.9877	21.8451	2.9557e-06	0.000212763
chr11:35120365:35120696	13	2	2	34	13	43	-2.50193	1.47836	21.8215	2.99235e-06	0.000215115
chr2:103183853:103184082	10	4	3	30	18	33	-2.35557	1.42611	21.8111	3.00862e-06	0.000215996
chr15:53441152:53441542	15	6	8	30	22	107	-2.42514	2.19438	21.804	3.01976e-06	0.000216508
chr17:4861038:4861244	4	6	2	16	21	41	-2.70437	1.34008	21.7936	3.03611e-06	0.000217104
chr19:48000131:48000647	39	4	9	66	41	135	-2.40222	2.8194	21.7954	3.03324e-06	0.000217104
chr17:32080409:32081324	34	7	18	106	26	137	-2.2358	2.95093	21.7826	3.05355e-06	0.000217487
chr19:27221747:27222249	33	14	21	127	36	98	-1.99973	3.02651	21.7873	3.04617e-06	0.000217487
chr5:116315758:116316689	46	20	13	107	46	149	-1.99331	3.2085	21.7836	3.05201e-06	0.000217487
chr17:43503376:43503800	21	12	6	60	34	61	-2.093	2.34545	21.7639	3.08345e-06	0.000219327
chr1:154070709:154071239	17	3	10	55	15	77	-2.3238	2.11573	21.7559	3.09635e-06	0.000219787
chr2:36066251:36066603	18	3	7	44	17	67	-2.2666	1.95926	21.7533	3.10059e-06	0.000219787
chr7:54053998:54054155	2	0	1	46	16	2	-4.53595	1.02916	21.7523	3.10213e-06	0.000219787
chr2:169556064:169556594	43	23	17	104	59	113	-1.83501	3.18935	21.7378	3.12564e-06	0.000221163
chr10:80790631:80791123	19	11	13	44	31	104	-2.05441	2.4689	21.7274	3.14277e-06	0.000222083
chr10:6234139:6235539	116	48	77	218	152	278	-1.56228	4.47296	21.7166	3.16042e-06	0.000222457
chr11:120144879:120145278	19	3	6	34	34	50	-2.30171	1.96442	21.718	3.15815e-06	0.000222457
chr5:13468909:13469197	8	4	3	29	13	35	-2.39982	1.31962	21.7215	3.15235e-06	0.000222457
chr10:9248985:9249792	53	24	32	190	91	104	-1.99254	3.68221	21.7105	3.17045e-06	0.000222583
chr2:92975401:92975821	21	2	10	66	41	40	-2.44014	2.27666	21.7109	3.16983e-06	0.000222583
chr11:103825298:103825705	9	4	2	72	40	12	-3.32373	2.01116	21.6656	3.24557e-06	0.000227561
chr3:121174510:121175049	29	12	13	76	27	110	-2.00101	2.6972	21.6621	3.25151e-06	0.000227681
chr13:110069448:110069796	11	6	3	54	22	28	-2.50135	1.76308	21.6471	3.27699e-06	0.000229169
chr11:89231712:89232187	24	10	0	117	55	63	-3.01067	2.83187	21.6305	3.3056e-06	0.000229387
chr13:113543544:113544137	21	5	8	39	32	60	-2.10816	2.10581	21.6383	3.29207e-06	0.000229387
chr14:25932787:25933160	13	4	6	26	36	42	-2.39051	1.82182	21.6358	3.2964e-06	0.000229387
chr16:20413949:20414432	18	22	13	145	64	66	-2.41841	3.14084	21.6349	3.29789e-06	0.000229387
chr1:92156622:92156969	8	5	6	25	15	63	-2.39697	1.64943	21.6308	3.30499e-06	0.000229387
chr19:40480083:40480950	37	12	30	129	58	91	-1.96181	3.18943	21.6362	3.29577e-06	0.000229387
chr7:19334879:19335665	58	21	42	99	82	250	-1.88993	3.73482	21.6266	3.31218e-06	0.000229548
chr2:119834459:119834714	10	2	2	17	20	40	-2.59346	1.31772	21.6236	3.31752e-06	0.000229624
chr1:135849747:135850212	25	3	0	52	50	74	-3.00074	2.42121	21.6132	3.33556e-06	0.000230577
chr1:55272298:55272607	20	2	6	33	28	63	-2.32747	1.96755	21.6069	3.34652e-06	0.000231038
chr8:113890684:113891106	23	3	7	44	23	80	-2.27277	2.15236	21.5598	3.4296e-06	0.000236471
chr6:84588144:84588531	23	3	3	53	25	57	-2.41907	2.06387	21.5547	3.43875e-06	0.000236785
chr9:123384699:123384989	8	4	3	33	29	20	-2.66602	1.50401	21.5524	3.44291e-06	0.000236785
chr1:170093590:170094214	32	9	10	63	33	93	-2.00276	2.57186	21.5489	3.44924e-06	0.000236918
chr9:32708739:32709470	39	17	35	88	66	135	-1.76129	3.26447	21.536	3.47251e-06	0.000238214
chr15:36848998:36849412	20	2	9	45	36	46	-2.28333	2.0794	21.4983	3.54144e-06	0.000242634
chr2:167745478:167745907	9	0	8	36	16	34	-2.45007	1.46947	21.4648	3.60385e-06	0.000246597
chr5:77795277:77795636	8	4	5	19	18	54	-2.43563	1.51498	21.4551	3.62204e-06	0.000247528
chr2:35940470:35940674	2	0	4	27	18	9	-3.32912	0.894103	21.4475	3.6365e-06	0.000248201
chr11:40085988:40086338	11	0	4	38	24	21	-2.74018	1.46667	21.4304	3.66916e-06	0.000250114
chr18:47179208:47180192	46	2	16	140	45	143	-2.57428	3.22701	21.4038	3.72025e-06	0.000253277
chr12:31986915:31987361	25	3	4	34	33	107	-2.60815	2.33642	21.3934	3.74065e-06	0.000254345
chr17:49344529:49344846	11	1	3	36	23	21	-2.66407	1.42529	21.379	3.76873e-06	0.000255932
chr4:138838887:138839556	38	6	10	108	47	68	-2.30771	2.82224	21.3677	3.791e-06	0.000256943
chr4:95397193:95398220	44	18	17	89	54	109	-1.80036	3.0612	21.3666	3.79313e-06	0.000256943
chr3:98256634:98257109	22	3	3	97	90	23	-3.43218	2.8021	21.3588	3.80875e-06	0.000257677
chr9:55329960:55330237	13	4	6	29	28	40	-2.24055	1.71603	21.3116	3.9036e-06	0.000263764
chr8:89411749:89412323	60	24	15	142	78	130	-1.9952	3.50694	21.3003	3.92674e-06	0.000264996
chr11:86654059:86654304	5	9	5	44	18	40	-2.3874	1.7158	21.2961	3.93527e-06	0.00026524
chr13:100965889:100966128	10	0	6	32	27	24	-2.63453	1.49232	21.2936	3.94038e-06	0.000265253
chr4:144529722:144530266	28	12	6	64	27	140	-2.32122	2.71847	21.2853	3.95749e-06	0.000266074
chr1:39291576:39292390	61	29	51	146	118	158	-1.74304	3.8718	21.2701	3.98907e-06	0.000267863
chr13:113146064:113146567	37	20	7	131	63	88	-2.28712	3.16763	21.2565	4.01747e-06	0.000269435
chr5:64344799:64345320	28	8	10	77	38	56	-2.083	2.49615	21.2303	4.07265e-06	0.000272459
chrX:104541598:104541749	4	0	1	30	29	4	-4.0245	1.11348	21.2321	4.06891e-06	0.000272459
chr9:115452644:115453259	47	7	8	65	56	192	-2.51523	3.15343	21.2262	4.08139e-06	0.000272706
chr7:77713931:77714280	10	1	4	32	19	24	-2.50536	1.33239	21.22	4.0948e-06	0.000273263
chr6:143255867:143256152	13	1	4	29	14	47	-2.41909	1.485	21.2123	4.11118e-06	0.000274018
chr17:68462272:68462553	12	5	3	35	13	51	-2.33089	1.61794	21.2072	4.12216e-06	0.000274411
chr3:115352571:115352970	17	2	2	44	16	47	-2.49877	1.71542	21.1986	4.14069e-06	0.000275305
chr4:152732197:152732512	14	3	1	48	26	25	-2.71577	1.69459	21.1903	4.15871e-06	0.000276163
chr1:194300523:194301122	5	2	4	29	18	17	-2.67651	1.13687	21.1879	4.16385e-06	0.000276165
chr5:36145916:36146876	73	21	10	121	82	435	-2.67307	4.06793	21.1846	4.17113e-06	0.000276308
chr2:169038817:169039197	28	12	15	51	39	110	-1.92141	2.66871	21.1816	4.17752e-06	0.000276392
chr3:101304198:101304662	27	10	13	59	32	81	-1.87102	2.4849	21.1793	4.18264e-06	0.000276392
chr10:95701428:95701896	24	6	6	46	25	77	-2.14553	2.19992	21.1742	4.19372e-06	0.000276786
chr16:86970812:86971225	14	7	5	48	25	37	-2.20483	1.87715	21.1709	4.20095e-06	0.000276924
chr15:97510532:97511167	17	25	3	121	50	152	-2.70797	3.2004	21.1662	4.21136e-06	0.000277272
chr16:32853411:32853936	39	4	9	89	39	91	-2.3062	2.74197	21.1549	4.23609e-06	0.000278561
chr2:157956027:157956714	37	23	16	138	57	91	-2.00521	3.21916	21.1461	4.25572e-06	0.000279171
chr9:64394287:64394739	18	14	10	50	32	80	-1.96579	2.39285	21.1475	4.25264e-06	0.000279171
chr15:99998072:99999147	132	65	72	22	16	37	1.75401	3.07351	21.127	4.29836e-06	0.000281626
chr7:118049603:118049881	11	0	4	23	13	47	-2.55479	1.35228	21.1217	4.31011e-06	0.000282053
chr19:41105380:41105906	16	8	20	88	66	45	-2.39289	2.76013	21.114	4.32756e-06	0.000282853
chr18:65158799:65159482	153	46	79	284	151	329	-1.61144	4.66195	21.0879	4.38687e-06	0.000286037
chr7:20412166:20412545	12	2	8	59	19	31	-2.44761	1.80341	21.0898	4.38263e-06	0.000286037
chr12:36421029:36421486	30	5	16	92	42	61	-2.14714	2.66458	21.0642	4.44144e-06	0.000289246
chr8:15036433:15036855	16	6	6	35	17	92	-2.34303	2.06889	21.0591	4.45337e-06	0.000289673
chr8:119864701:119865053	16	13	0	62	48	69	-2.72816	2.48313	21.0369	4.50523e-06	0.000292694
chr17:66714300:66714611	10	0	7	25	23	34	-2.45194	1.45071	21.0304	4.52052e-06	0.000293334
chr17:5794283:5794725	18	5	6	58	16	56	-2.23759	2.00411	21.0235	4.53693e-06	0.000294045
chr6:72478292:72478735	21	10	7	63	32	51	-2.07165	2.27673	20.9883	4.62104e-06	0.000299137
chr10:74569654:74570171	22	2	17	86	38	55	-2.32994	2.51454	20.982	4.63617e-06	0.000299399
chr16:31415920:31416617	45	12	19	61	69	139	-2.00429	3.11837	20.9835	4.63264e-06	0.000299399
chr16:31276159:31277490	174	72	109	338	188	386	-1.47752	4.95999	20.9749	4.65329e-06	0.000300146
chr1:188171460:188171918	23	8	8	67	22	67	-2.07716	2.29073	20.9579	4.69499e-06	0.000302474
chr10:107871017:107871444	23	4	3	65	21	58	-2.42608	2.13087	20.9243	4.77798e-06	0.000306723
chr18:47744622:47745905	216	109	103	383	278	501	-1.56665	5.31243	20.9254	4.77523e-06	0.000306723
chr9:56352799:56353169	19	3	9	56	28	41	-2.20571	2.04336	20.9267	4.77207e-06	0.000306723
chr12:56551109:56551879	59	36	32	124	92	166	-1.68215	3.69758	20.9194	4.79031e-06	0.000307149
chr11:17365609:17365855	7	22	45	4	0	2	3.68911	1.24523	20.8979	4.8442e-06	0.000309956
chr12:15745827:15746043	4	0	6	25	15	20	-2.69117	1.02307	20.8974	4.84558e-06	0.000309956
chr17:47843147:47843812	31	8	1	69	34	193	-2.95207	2.95771	20.8915	4.86034e-06	0.000310533
chr13:115675401:115675763	8	0	7	46	21	20	-2.73438	1.5141	20.8865	4.87314e-06	0.000310982
chr5:112727357:112728057	54	36	40	163	79	156	-1.66669	3.73712	20.8831	4.88187e-06	0.000311171
chr2:124677685:124678069	24	3	6	53	41	44	-2.37053	2.19927	20.8691	4.91769e-06	0.000312348
chr4:59574292:59574586	15	0	0	44	21	32	-2.99351	1.58762	20.8721	4.90999e-06	0.000312348
chr5:104187451:104187878	9	10	8	55	33	36	-2.28263	2.06756	20.8712	4.91224e-06	0.000312348
chr10:21024770:21025197	11	8	7	37	35	38	-2.22445	1.92874	20.8631	4.93311e-06	0.000312592
chr9:60352137:60353189	66	12	28	111	61	235	-2.05234	3.58486	20.8636	4.93186e-06	0.000312592
chr19:34799809:34800281	38	7	8	57	47	105	-2.18838	2.7094	20.8599	4.94131e-06	0.000312721
chr2:60900082:60900527	23	0	7	33	34	173	-3.12959	2.65078	20.8578	4.94673e-06	0.000312721
chr2:59811387:59811659	13	5	2	46	30	25	-2.56578	1.76524	20.8553	4.95314e-06	0.00031276
chr14:34504918:34505224	16	6	7	54	16	55	-2.15409	1.96924	20.8509	4.96451e-06	0.000313112
chr1:155390126:155390483	16	6	7	35	20	66	-2.10548	1.93181	20.8235	5.03613e-06	0.000316889
chr6:120140598:120141228	32	13	11	54	55	88	-1.98814	2.72236	20.8243	5.03405e-06	0.000316889
chr17:81904511:81904824	9	1	1	28	6	43	-2.82314	1.18889	20.814	5.06115e-06	0.000318092
chr1:67514142:67514314	3	0	0	24	30	2	-4.60083	0.966256	20.8025	5.09161e-06	0.000319635
chr7:96825829:96826298	18	8	7	67	26	43	-2.16214	2.15341	20.744	5.24965e-06	0.000329173
chr18:39210451:39211275	63	25	11	150	82	151	-2.12194	3.59678	20.7318	5.28317e-06	0.000330891
chr13:83704891:83705785	43	21	35	104	87	113	-1.78041	3.40328	20.7179	5.32166e-06	0.00033253
chr16:91362849:91364128	83	36	46	215	83	195	-1.6661	4.01126	20.7198	5.31643e-06	0.00033253
chr10:59391884:59392258	16	2	1	68	33	22	-3.04141	1.97173	20.683	5.41964e-06	0.000338261
chr3:38835366:38836584	82	29	43	188	106	153	-1.72533	3.93077	20.6785	5.43238e-06	0.000338664
chr3:84197738:84198195	13	3	1	27	12	67	-2.66553	1.6174	20.6745	5.44363e-06	0.000338974
chr1:192896899:192897313	14	4	5	29	26	40	-2.20944	1.6819	20.6476	5.52075e-06	0.000343381
chr10:53180969:53181497	45	7	14	68	47	142	-2.12452	2.96219	20.6361	5.55383e-06	0.000345041
chr3:135749259:135750954	147	69	97	297	170	336	-1.4633	4.78853	20.6116	5.62542e-06	0.000349087
chr19:23462667:23463399	53	7	17	108	74	97	-2.16971	3.18985	20.5854	5.70295e-06	0.000353491
chr11:75744399:75745228	64	33	17	167	78	166	-1.94698	3.70868	20.5804	5.71797e-06	0.000354016
chr6:134926154:134927306	104	12	48	194	102	445	-2.30725	4.36822	20.5756	5.73226e-06	0.000354494
chr7:72943746:72944069	14	5	2	34	16	48	-2.29564	1.63235	20.556	5.79123e-06	0.000357731
chr16:4894177:4894785	37	13	22	85	74	77	-1.94843	3.03989	20.5506	5.80748e-06	0.000358325
chr8:71791417:71791721	35	39	30	8	5	7	2.35764	1.77931	20.5328	5.86194e-06	0.000361272
chr14:122222277:122222728	23	3	8	81	28	43	-2.3783	2.26791	20.5272	5.87893e-06	0.000361906
chr11:67391497:67392234	36	10	7	53	42	133	-2.22187	2.77347	20.4947	5.97981e-06	0.000367697
chr1:153931845:153932509	37	4	11	54	43	119	-2.24737	2.71181	20.4685	6.06211e-06	0.000371147
chr12:25769224:25769549	18	1	3	43	23	37	-2.47275	1.72895	20.4681	6.06342e-06	0.000371147
chr13:56667636:56667995	12	3	2	31	12	42	-2.38954	1.41801	20.4721	6.05073e-06	0.000371147
chr15:58808856:58809104	4	2	5	23	9	32	-2.52383	1.04907	20.4733	6.04683e-06	0.000371147
chr17:56350417:56350873	30	6	1	58	35	120	-2.68792	2.59981	20.4439	6.1406e-06	0.000375446
chr11:102307137:102307637	15	4	7	60	20	35	-2.27885	1.89659	20.4337	6.17335e-06	0.000377021
chr10:42019864:42020368	18	14	15	61	28	88	-1.89406	2.49944	20.4239	6.20496e-06	0.000378524
chr14:121501690:121502304	67	10	21	114	62	183	-2.05837	3.44632	20.415	6.2338e-06	0.000379425
chr3:37833782:37834524	28	16	6	61	34	194	-2.45943	2.98738	20.416	6.23077e-06	0.000379425
chr7:96825353:96825741	15	0	2	65	15	32	-2.95162	1.7476	20.4105	6.24874e-06	0.000379906
chr8:109793546:109793782	8	0	2	24	7	32	-2.70572	0.978483	20.4075	6.25845e-06	0.000380069
chr8:131012276:131012744	22	6	4	95	34	35	-2.59185	2.37677	20.4035	6.27158e-06	0.000380438
chr4:152598530:152599330	72	5	27	212	96	147	-2.44938	3.80123	20.3961	6.29566e-06	0.000381085
chr5:141607680:141608121	12	0	14	52	23	50	-2.38537	1.97385	20.3959	6.29636e-06	0.000381085
chr15:72729560:72729939	22	1	13	55	24	78	-2.24932	2.25545	20.3856	6.33046e-06	0.00038272
chr12:4430792:4431203	19	25	62	3	6	2	3.12133	1.72917	20.3768	6.3597e-06	0.000384058
chr9:32908767:32909294	22	8	16	112	49	41	-2.33394	2.73347	20.3708	6.37957e-06	0.000384827
chr12:40457541:40458006	26	7	8	39	32	94	-2.1145	2.35849	20.3617	6.41002e-06	0.000386233
chr10:8806754:8807256	26	8	3	63	49	50	-2.41113	2.42555	20.3592	6.41843e-06	0.000386308
chr19:25451528:25452029	19	6	9	69	29	39	-2.1761	2.17983	20.3544	6.43438e-06	0.000386837
chr3:104890298:104890732	37	12	9	63	42	104	-1.98163	2.7337	20.3097	6.58648e-06	0.00039554
chr9:50044184:50044698	20	7	7	30	29	92	-2.21318	2.21118	20.3074	6.59448e-06	0.000395581
chr8:129349819:129351183	132	57	94	250	137	395	-1.51831	4.67681	20.305	6.6028e-06	0.00039564
chr10:56471894:56472287	16	3	6	28	16	114	-2.64141	2.11346	20.2902	6.65411e-06	0.000398273
chr11:51752194:51752515	2	7	1	24	22	23	-2.81166	1.2366	20.2851	6.67193e-06	0.000398897
chr14:75904162:75904441	12	1	0	32	24	21	-2.88061	1.35806	20.2769	6.7004e-06	0.000400156
chr13:112792713:112793902	104	13	52	217	104	312	-2.08391	4.2422	20.2669	6.73569e-06	0.000401819
chr7:77509657:77510095	12	6	3	37	13	50	-2.26625	1.64553	20.2637	6.74693e-06	0.000402045
chr8:97229597:97230277	45	15	16	105	60	83	-1.91004	3.06203	20.2538	6.78177e-06	0.000403676
chr3:59770424:59770901	83	33	34	8	8	17	2.04296	2.18044	20.249	6.79907e-06	0.00040426
chr12:40682931:40683367	21	10	13	48	36	64	-1.86046	2.33212	20.2089	6.94305e-06	0.000412366
chr17:28600582:28601452	73	30	34	161	80	152	-1.65188	3.72544	20.1654	7.10244e-06	0.00042137
chr10:82223857:82224352	26	7	6	41	37	70	-2.1064	2.27386	20.1591	7.12589e-06	0.000422297
chr11:46122421:46122609	5	0	0	4	17	33	-3.56401	0.782167	20.134	7.22e-06	0.000426682
chr2:159179977:159180306	23	5	6	35	39	59	-2.19775	2.14559	20.1324	7.22624e-06	0.000426682
chr3:81995634:81996298	24	14	18	51	43	97	-1.82719	2.66068	20.131	7.23149e-06	0.000426682
chr5:93058781:93059157	11	0	8	55	80	17	-3.52414	2.39363	20.1343	7.21915e-06	0.000426682
chr5:151905803:151906135	12	4	2	56	18	24	-2.6008	1.65655	20.1263	7.24918e-06	0.000427258
chr1:88157108:88157430	16	2	3	27	15	76	-2.5544	1.77482	20.1181	7.28038e-06	0.00042863
chr9:115617463:115618030	37	15	27	87	38	153	-1.82152	3.09934	20.1072	7.32192e-06	0.000430605
chr17:35939875:35940485	18	13	18	89	35	62	-1.97463	2.61474	20.1012	7.34509e-06	0.000431498
chr14:101289000:101289375	17	5	6	39	21	48	-2.05906	1.82837	20.0959	7.36552e-06	0.000432228
chr6:93786518:93786812	13	0	3	32	13	36	-2.4876	1.35675	20.0768	7.43945e-06	0.000436092
chr19:8646319:8646648	25	3	1	48	29	72	-2.59185	2.16482	20.0739	7.45081e-06	0.000436284
chr7:123344285:123344665	16	3	5	58	19	33	-2.36228	1.82215	20.0614	7.49956e-06	0.000438664
chr10:92839646:92839989	12	4	4	21	18	58	-2.32636	1.60245	20.0541	7.52816e-06	0.000439859
chr12:10196108:10196552	25	8	14	44	29	130	-2.11974	2.58556	20.0332	7.61074e-06	0.000444204
chr18:67556071:67556496	15	2	4	41	13	44	-2.32682	1.61456	20.0243	7.6464e-06	0.000445803
chr11:49449141:49449730	20	0	11	48	20	133	-2.74915	2.43583	20.0087	7.70892e-06	0.00044848
chr19:53273278:53273974	38	20	18	69	47	157	-1.86009	3.08893	20.0089	7.70817e-06	0.00044848
chr2:138091067:138091768	34	14	31	66	63	133	-1.82555	3.11071	20.0053	7.72287e-06	0.000448808
chr1:79753635:79754320	31	22	13	67	60	106	-1.9047	2.96031	19.9856	7.80279e-06	0.000451993
chr5:121071463:121071862	22	3	5	35	25	66	-2.23099	1.98409	19.9869	7.79752e-06	0.000451993
chr9:37614337:37614723	9	2	5	94	15	18	-3.11731	1.92938	19.9869	7.79751e-06	0.000451993
chr7:142105769:142106088	18	2	2	38	18	47	-2.39744	1.69004	19.98	7.82569e-06	0.000452833
chr8:72800382:72800691	14	5	3	27	19	51	-2.22247	1.64117	19.9516	7.94256e-06	0.000459104
chr8:35006548:35007049	22	4	2	39	28	56	-2.34384	1.96965	19.9487	7.95495e-06	0.000459328
chr12:119090227:119090741	24	4	6	63	24	51	-2.20107	2.13572	19.9417	7.98407e-06	0.000460517
chr10:98903641:98903982	16	3	10	41	16	68	-2.14866	1.9411	19.935	8.01212e-06	0.000461642
chr5:34302002:34302381	12	7	4	37	19	40	-2.1312	1.67431	19.9328	8.02119e-06	0.000461671
chr15:44548655:44549315	23	18	34	111	56	102	-1.87843	3.15008	19.928	8.04156e-06	0.000462351
chr5:122136598:122136818	8	2	2	13	17	37	-2.57902	1.13354	19.924	8.05832e-06	0.000462822
chr1:88007207:88007459	5	4	2	35	15	16	-2.67284	1.16105	19.9182	8.08265e-06	0.000463726
chr4:88686285:88686542	3	0	4	36	33	5	-3.72907	1.34328	19.9067	8.13137e-06	0.000466026
chr14:33667327:33667484	7	4	1	64	38	8	-3.46601	1.85334	19.9028	8.14804e-06	0.000466486
chr5:120606557:120606927	22	3	4	46	21	56	-2.24909	1.94788	19.8982	8.16774e-06	0.000467118
chr7:80811691:80812726	84	44	65	201	91	256	-1.53497	4.17101	19.8825	8.23501e-06	0.000470467
chr11:46104568:46104833	6	4	4	17	20	33	-2.40179	1.25363	19.8743	8.27064e-06	0.000472004
chr11:5040580:5041621	72	23	16	99	78	370	-2.34493	3.91409	19.8675	8.30008e-06	0.000473183
chr15:26938857:26939225	15	4	0	19	35	64	-2.85056	1.87036	19.8636	8.31694e-06	0.000473644
chr12:106272627:106272849	9	2	5	27	16	29	-2.28106	1.28323	19.8475	8.38729e-06	0.000477148
chr17:33925612:33926119	35	5	9	104	56	49	-2.4323	2.77197	19.8451	8.3977e-06	0.000477237
chr14:119136156:119136953	75	28	21	189	115	123	-2.03286	3.84232	19.8358	8.43868e-06	0.000479061
chr15:27751515:27751967	13	6	6	46	29	29	-2.23164	1.83992	19.8225	8.49749e-06	0.000481893
chr5:91308668:91308908	7	1	8	20	20	37	-2.36905	1.36113	19.8166	8.52374e-06	0.000482875
chr11:89989041:89989362	13	2	2	32	9	57	-2.56318	1.52741	19.7934	8.62783e-06	0.000488259
chr1:84848139:84848499	10	4	3	15	17	78	-2.66823	1.67552	19.7901	8.64284e-06	0.000488597
chr4:48767437:48767959	14	4	12	26	34	65	-2.18229	2.03537	19.7858	8.66224e-06	0.000489181
chr5:32526984:32527298	11	0	4	12	21	74	-2.93946	1.63188	19.7828	8.67591e-06	0.000489441
chr5:111485734:111486469	37	14	9	106	43	75	-2.05798	2.85405	19.7773	8.70096e-06	0.000490342
chr4:149260703:149261500	46	13	35	101	58	125	-1.72028	3.2354	19.757	8.79368e-06	0.00049505
chr9:40916370:40916863	24	19	4	79	35	117	-2.2655	2.78655	19.7503	8.82457e-06	0.000496272
chr6:72341113:72341577	18	9	16	86	41	43	-2.12963	2.51601	19.7482	8.8343e-06	0.000496302
chr11:103232388:103232960	41	18	7	70	56	144	-2.13465	3.05851	19.7459	8.84503e-06	0.000496389
chr12:16872623:16873925	76	26	37	139	82	159	-1.60248	3.68964	19.7174	8.97816e-06	0.000503337
chr11:73139981:73140364	14	3	5	38	16	38	-2.17682	1.58967	19.7076	9.02438e-06	0.000505402
chr18:13882268:13882641	10	7	6	40	29	29	-2.2336	1.76859	19.6916	9.09989e-06	0.000508577
chr9:72551629:72551870	4	0	5	34	4	31	-2.89441	1.06435	19.6927	9.09466e-06	0.000508577
chr14:20735151:20735622	20	2	9	66	25	40	-2.2823	2.07878	19.6851	9.13092e-06	0.000509783
chr17:31998858:31999455	54	12	34	102	54	181	-1.84305	3.38383	19.6826	9.1429e-06	0.000509924
chr8:125801271:125801644	7	0	6	25	61	16	-3.47816	1.86174	19.6714	9.19653e-06	0.000512386
chr2:52846873:52847302	15	7	7	39	29	40	-2.04045	1.89729	19.6585	9.25896e-06	0.000515333
chr5:24575388:24576267	106	33	42	133	128	304	-1.79513	4.18276	19.6563	9.2695e-06	0.000515388
chr6:143100719:143101244	23	8	16	64	43	52	-1.94023	2.45753	19.6516	9.29256e-06	0.000516139
chr7:122411446:122411747	8	5	12	34	30	40	-2.16339	1.83614	19.6383	9.35753e-06	0.000519213
chr12:30637898:30638303	8	6	8	40	16	39	-2.12991	1.64872	19.6289	9.4036e-06	0.000521234
chr7:133926212:133926547	43	27	18	5	3	9	2.30312	1.48437	19.6161	9.46659e-06	0.000524187
chr15:91025823:91026017	8	2	0	26	6	34	-2.73524	1.02614	19.614	9.47723e-06	0.000524239
chr19:55306570:55307001	17	10	8	37	25	74	-1.98208	2.12734	19.5879	9.60745e-06	0.000530898
chr15:78350683:78351134	47	8	6	91	60	94	-2.30636	2.95899	19.576	9.66766e-06	0.000533127
chr3:31152721:31153182	17	4	7	34	21	52	-2.0437	1.80886	19.576	9.66779e-06	0.000533127
chr5:112077820:112078479	74	14	46	142	82	197	-1.81221	3.75325	19.5741	9.67741e-06	0.000533127
chr3:138440287:138441001	47	13	24	151	59	82	-1.99297	3.25935	19.565	9.72328e-06	0.000535107
chr14:20984548:20985032	21	2	11	30	28	132	-2.54054	2.41451	19.5572	9.76341e-06	0.000536223
chrX:69339681:69340430	20	3	9	42	27	48	-2.04823	1.96482	19.5585	9.75647e-06	0.000536223
chr12:76497944:76498371	25	9	8	61	21	82	-2.01321	2.3429	19.5513	9.79328e-06	0.000537317
chr16:23214382:23214765	17	9	3	46	42	38	-2.34206	2.11261	19.542	9.84104e-06	0.000539389
chr5:113721882:113722241	21	9	4	47	20	85	-2.18256	2.19779	19.5199	9.95553e-06	0.000545111
chr14:66166623:66166979	9	2	7	27	14	39	-2.20977	1.38991	19.5164	9.97416e-06	0.000545577
chr3:141364481:141364784	9	2	8	38	28	22	-2.42773	1.60967	19.503	1.00444e-05	0.000548863
chr19:42833094:42833461	22	4	7	39	20	81	-2.16479	2.08836	19.5009	1.0055e-05	0.000548886
chr19:10020294:10020844	26	7	6	42	34	67	-2.0476	2.23045	19.4844	1.01424e-05	0.000552653
chr2:91811716:91812673	51	15	27	112	66	97	-1.75954	3.23297	19.484	1.01445e-05	0.000552653
chr1:36617629:36618152	26	11	15	50	30	113	-1.90711	2.58359	19.4732	1.02022e-05	0.000555239
chr12:40487556:40488073	30	12	19	87	32	82	-1.79368	2.71413	19.437	1.03976e-05	0.000565302
chr10:93569791:93570256	36	8	8	62	35	92	-2.02084	2.57635	19.4312	1.04289e-05	0.000565867
chr9:99320748:99321013	10	5	0	34	13	32	-2.46453	1.35029	19.4314	1.04277e-05	0.000565867
chr1:80049217:80049643	14	5	9	27	20	80	-2.18575	1.95645	19.4136	1.05252e-05	0.000569946
chr7:20402409:20403350	68	34	38	176	84	143	-1.64021	3.77813	19.4144	1.05209e-05	0.000569946
chr5:147588493:147589032	14	6	4	30	30	37	-2.19571	1.74452	19.4116	1.05365e-05	0.000569985
chr2:106387283:106387601	9	8	8	39	16	52	-2.07376	1.78793	19.4091	1.05501e-05	0.00057015
chr10:14155965:14156276	11	2	2	48	19	17	-2.71035	1.46844	19.4064	1.05654e-05	0.000570407
chr1:187248731:187249140	8	3	2	28	18	19	-2.48174	1.17269	19.3916	1.06475e-05	0.000574262
chr9:107597642:107598769	61	47	20	193	92	199	-1.94171	3.94089	19.3885	1.06649e-05	0.000574625
chr16:31526741:31527076	14	0	2	18	20	51	-2.66971	1.46193	19.3791	1.07174e-05	0.000576304
chr19:4196136:4196810	15	15	9	67	58	44	-2.27122	2.55324	19.3791	1.07172e-05	0.000576304
chr17:81232992:81233422	8	4	5	28	22	25	-2.28105	1.39159	19.3708	1.0764e-05	0.000578237
chr2:52327095:52328153	46	29	31	120	54	148	-1.62044	3.40479	19.3582	1.08351e-05	0.000581479
chr19:47523012:47523330	13	2	2	35	16	28	-2.38696	1.38354	19.3493	1.0886e-05	0.000583366
chr8:81846615:81847396	55	14	14	96	51	130	-1.90028	3.13602	19.3482	1.08919e-05	0.000583366
chr1:154308957:154309227	10	7	2	27	22	36	-2.25412	1.5265	19.3458	1.09057e-05	0.000583524
chr5:36138068:36138709	40	16	18	72	38	162	-1.89118	3.04316	19.3439	1.09169e-05	0.000583548
chr2:32362307:32362815	19	8	4	29	28	81	-2.22397	2.10178	19.3372	1.0955e-05	0.000585001
chr19:9140467:9141011	14	3	10	29	22	56	-2.07476	1.8015	19.3244	1.10289e-05	0.000588369
chr4:140871529:140872358	54	18	27	99	71	110	-1.68556	3.27512	19.3142	1.10879e-05	0.00059093
chr8:90439643:90439916	4	5	10	27	31	35	-2.38616	1.67967	19.3007	1.11664e-05	0.00059453
chr2:140494077:140494288	14	4	8	26	32	44	-2.15422	1.80896	19.2937	1.12074e-05	0.000596123
chr18:69758031:69758307	12	2	8	28	22	38	-2.14117	1.57533	19.2812	1.12814e-05	0.000599467
chr19:40564133:40564426	3	10	4	71	20	31	-2.75297	1.92732	19.263	1.13895e-05	0.000604618
chr4:94764945:94765209	11	1	1	24	11	33	-2.49895	1.1264	19.2542	1.14418e-05	0.000606799
chr1:158917743:158918107	24	7	1	64	27	60	-2.40688	2.22431	19.2332	1.15686e-05	0.000612399
chr8:74879459:74880040	24	16	10	88	24	93	-2.01388	2.65554	19.2329	1.15701e-05	0.000612399
chr1:171298862:171299251	12	12	4	62	63	30	-2.69073	2.42454	19.2187	1.16567e-05	0.000616378
chr7:78849592:78850915	165	71	35	408	200	357	-1.99428	4.93918	19.2127	1.16931e-05	0.000617697
chr4:8833858:8834463	35	6	2	93	53	63	-2.62031	2.71788	19.2056	1.17371e-05	0.000619414
chr19:44328409:44328646	8	1	2	13	15	32	-2.55995	0.995704	19.1849	1.18649e-05	0.000625547
chr3:145266609:145266871	7	3	2	26	7	34	-2.47194	1.09059	19.1746	1.19292e-05	0.000628324
chr14:12964645:12965054	11	1	4	30	34	18	-2.71858	1.528	19.1719	1.19457e-05	0.000628583
chr17:47830553:47830979	18	19	11	54	38	96	-1.9445	2.60165	19.1567	1.20416e-05	0.000633008
chr8:108322973:108323620	44	21	15	78	66	108	-1.80802	3.09823	19.1481	1.20957e-05	0.000635234
chr3:154354959:154356007	174	57	86	299	179	325	-1.51767	4.78718	19.1438	1.21231e-05	0.000636058
chr6:8044317:8044805	8	8	5	47	44	21	-2.62332	1.97341	19.1328	1.21932e-05	0.000639114
chr10:95720307:95721039	67	28	17	174	70	143	-1.92169	3.63033	19.1165	1.22978e-05	0.000642105
chr14:32802159:32802551	12	7	0	40	17	39	-2.40573	1.62007	19.1193	1.22799e-05	0.000642105
chr17:46563300:46563781	80	103	65	14	10	36	2.17688	3.02472	19.1216	1.22648e-05	0.000642105
chr8:129312571:129312971	24	0	11	48	41	59	-2.37671	2.26256	19.1168	1.22958e-05	0.000642105
chr1:158928079:158928315	3	6	6	34	12	34	-2.35846	1.38184	19.1103	1.23376e-05	0.00064216
chr13:32920787:32921146	16	2	2	18	32	52	-2.61166	1.71797	19.1112	1.23316e-05	0.00064216
chr1:53987987:53988742	38	9	30	103	57	87	-1.86177	3.05294	19.1071	1.23584e-05	0.00064216
chr4:86005443:86005770	11	5	2	24	14	48	-2.286	1.45101	19.1088	1.23475e-05	0.00064216
chr7:132709937:132710373	22	8	10	61	22	60	-1.91724	2.2153	19.1099	1.23401e-05	0.00064216
chr11:4089695:4089937	23	20	29	0	6	4	2.70531	1.23587	19.1019	1.23921e-05	0.00064329
chr4:148948675:148948968	14	2	1	25	15	43	-2.41878	1.39521	19.0886	1.24788e-05	0.000647171
chr7:96957669:96958454	102	52	32	240	151	202	-1.84545	4.32379	19.0847	1.25041e-05	0.000647862
chr13:40954772:40955651	60	37	38	199	85	136	-1.72499	3.82163	19.0416	1.27899e-05	0.000662035
chr14:122101752:122102113	25	7	9	42	24	97	-2.04385	2.31559	19.0128	1.29841e-05	0.000670914
chr8:127845649:127846146	12	5	9	30	16	67	-2.11026	1.81577	19.0107	1.29987e-05	0.000670914
chr9:14646827:14647250	17	7	5	29	20	87	-2.23342	2.03005	19.012	1.29897e-05	0.000670914
chr14:120754052:120755261	110	38	60	196	106	236	-1.49914	4.18761	18.9934	1.31174e-05	0.00067639
chr10:56101474:56101933	19	4	14	37	27	73	-1.97877	2.14312	18.9852	1.31733e-05	0.000678155
chr12:117507695:117508343	90	39	40	181	161	159	-1.81791	4.14923	18.9835	1.31854e-05	0.000678155
chr18:84879054:84879655	30	13	13	41	42	168	-2.16719	2.88067	18.9829	1.31893e-05	0.000678155
chr9:115574716:115575088	15	1	3	15	26	67	-2.69031	1.71563	18.969	1.32856e-05	0.00068246
chr7:78556221:78556783	13	5	10	62	14	47	-2.16657	1.95202	18.966	1.3307e-05	0.000682905
chr1:179566995:179567768	40	20	20	105	78	75	-1.89808	3.17948	18.9545	1.33876e-05	0.000684441
chr13:13474086:13474592	35	8	6	70	74	55	-2.40978	2.76905	18.9575	1.3366e-05	0.000684441
chr8:48465022:48466010	96	33	52	133	116	252	-1.60858	4.06987	18.9549	1.33844e-05	0.000684441
chr9:71395282:71396088	107	40	20	262	122	221	-2.03975	4.25937	18.9587	1.33582e-05	0.000684441
chr18:80472438:80472904	26	5	10	42	28	77	-1.97014	2.23588	18.9405	1.3486e-05	0.00068882
chr11:117109874:117110646	105	59	53	193	114	308	-1.54074	4.34064	18.9363	1.35158e-05	0.000689689
chr18:78518840:78519712	41	9	11	119	47	64	-2.1579	2.89496	18.9157	1.36623e-05	0.000696505
chr18:75604092:75604473	22	0	4	42	20	68	-2.52082	1.95192	18.9122	1.36871e-05	0.000697112
chr13:52825439:52825667	12	1	0	23	9	59	-2.86492	1.3839	18.8872	1.38679e-05	0.000705655
chr5:139594116:139594863	41	1	9	71	38	237	-2.91937	3.1611	18.8798	1.39216e-05	0.00070772
chr10:26519207:26519885	73	20	32	143	69	144	-1.67482	3.56514	18.8579	1.40827e-05	0.000714564
chr19:42142896:42143916	90	30	19	142	147	184	-2.05069	3.99037	18.8583	1.40797e-05	0.000714564
chr1:196721336:196721895	44	7	25	72	55	121	-1.8854	3.00804	18.855	1.41044e-05	0.000714996
chr16:43396968:43397308	14	12	6	45	20	68	-2.0261	2.07881	18.8388	1.42241e-05	0.000720384
chr6:17873336:17873675	17	5	4	34	24	41	-2.08931	1.74142	18.8357	1.42474e-05	0.000720889
chr2:118332880:118333172	12	2	4	27	12	42	-2.24124	1.37585	18.8313	1.42801e-05	0.000721865
chr11:49440140:49440570	15	6	0	24	22	91	-2.73244	1.97075	18.8248	1.43295e-05	0.000723275
chr8:94512872:94513552	37	27	24	143	72	86	-1.88054	3.35692	18.8241	1.43347e-05	0.000723275
chr8:74655104:74655552	35	7	16	58	32	123	-1.9604	2.70213	18.8113	1.44309e-05	0.000727449
chr16:55730817:55731597	78	37	42	159	103	157	-1.56476	3.87657	18.801	1.45089e-05	0.000730699
chr14:33808048:33808824	36	4	17	60	44	92	-1.9876	2.66533	18.7961	1.45467e-05	0.00073145
chr14:69311359:69311908	68	8	27	173	97	105	-2.20279	3.61779	18.7955	1.4551e-05	0.00073145
chr9:96872180:96872983	92	32	52	134	98	266	-1.59655	4.02497	18.7772	1.4691e-05	0.000737802
chr10:6514013:6514815	42	42	20	127	85	172	-1.88172	3.64286	18.7718	1.47328e-05	0.000739213
chr10:99210464:99211131	34	14	22	98	57	66	-1.83908	2.938	18.7629	1.48016e-05	0.000741978
chr15:78617572:78618140	21	15	6	56	26	90	-2.01863	2.42215	18.7566	1.48511e-05	0.000743078
chr4:71629690:71630100	22	9	5	36	31	69	-2.03269	2.15201	18.7577	1.48426e-05	0.000743078
chr13:26449465:26449699	5	1	4	9	15	38	-2.67516	1.00921	18.7483	1.49153e-05	0.000745598
chr11:58983170:58983752	28	11	0	84	33	128	-2.72016	2.77974	18.7316	1.50468e-05	0.000751476
chr11:74648117:74648631	24	10	9	48	38	56	-1.88699	2.29372	18.7296	1.50627e-05	0.000751574
chr6:84580315:84580639	18	4	9	41	21	49	-1.95643	1.88066	18.7277	1.50778e-05	0.000751635
chr11:76068845:76069672	64	27	30	106	80	144	-1.59181	3.51038	18.7126	1.51975e-05	0.000756204
chr13:55625582:55626362	30	8	22	94	34	75	-1.87333	2.72556	18.713	1.51944e-05	0.000756204
chr13:94681035:94681335	7	4	2	23	7	46	-2.48433	1.22056	18.7059	1.52508e-05	0.000757492
chr9:9779475:9779973	12	9	4	32	33	38	-2.18553	1.84223	18.7058	1.52514e-05	0.000757492
chr15:84457002:84457360	12	7	4	34	14	51	-2.11187	1.66299	18.7029	1.52753e-05	0.000757982
chr13:100623063:100623538	21	0	0	31	32	139	-3.50891	2.40479	18.6951	1.53379e-05	0.000760388
chr8:95422113:95422336	9	3	4	30	10	34	-2.24821	1.2709	18.6901	1.53776e-05	0.000761657
chr15:79884408:79884742	16	4	2	37	15	44	-2.23379	1.61567	18.6811	1.54509e-05	0.000763761
chr17:56278875:56279106	8	6	0	40	22	19	-2.67706	1.44965	18.6808	1.54534e-05	0.000763761
chr6:15677918:15678601	73	33	36	116	107	168	-1.62594	3.77024	18.6796	1.54625e-05	0.000763761
chr12:106792246:106792969	25	9	4	72	41	42	-2.26591	2.37291	18.6728	1.55184e-05	0.00076582
chr1:92154758:92155620	50	22	14	74	58	193	-1.96844	3.30835	18.6523	1.56861e-05	0.000773391
chr10:59842967:59843384	14	9	0	42	27	43	-2.39817	1.86962	18.6112	1.60276e-05	0.000789505
chr17:47465856:47466232	17	3	6	62	20	31	-2.30157	1.87665	18.5998	1.61242e-05	0.000793538
chr15:83307256:83307767	28	5	17	40	35	161	-2.27738	2.75558	18.5944	1.61697e-05	0.000795056
chr1:87878373:87878825	27	4	12	43	35	69	-1.96157	2.28279	18.5829	1.62675e-05	0.000799136
chr7:83738419:83738712	13	0	3	16	17	57	-2.62601	1.45	18.5797	1.62943e-05	0.000799723
chr14:47686475:47686846	16	7	6	26	20	101	-2.30869	2.10203	18.5743	1.63412e-05	0.000801299
chr14:41264145:41264459	15	2	4	21	32	38	-2.39076	1.63737	18.5647	1.64237e-05	0.000804612
chr1:92495794:92496173	20	2	4	27	24	61	-2.28683	1.82175	18.5517	1.65359e-05	0.000809376
chr5:151888929:151889970	93	22	44	170	74	232	-1.70349	3.91179	18.5448	1.65961e-05	0.000811586
chr17:28179198:28179795	36	13	6	108	39	72	-2.15583	2.796	18.5344	1.66866e-05	0.000815272
chr11:51907929:51908461	52	8	17	74	48	155	-2.00491	3.07965	18.5273	1.67487e-05	0.000816826
chr11:68546748:68547352	153	83	127	49	23	38	1.62719	3.54842	18.5284	1.67395e-05	0.000816826
chr13:93066616:93067400	99	38	58	19	11	25	1.7047	2.61154	18.5236	1.67816e-05	0.000817696
chr1:191999154:191999435	10	4	2	26	11	38	-2.26638	1.28098	18.514	1.68658e-05	0.000819704
chr4:151064482:151064977	21	10	11	64	43	41	-2.01106	2.37191	18.5167	1.68425e-05	0.000819704
chr4:65081708:65082037	16	1	2	28	14	51	-2.42546	1.51655	18.5137	1.68684e-05	0.000819704
chr10:101952815:101953297	27	11	4	49	45	65	-2.12112	2.41182	18.491	1.70711e-05	0.00082881
chr9:115242091:115242531	19	7	8	56	15	65	-2.02811	2.08276	18.4761	1.7205e-05	0.000834556
chr3:52306187:52306482	9	2	5	15	17	45	-2.33765	1.32288	18.4504	1.74388e-05	0.000845142
chr8:15018068:15018908	52	24	26	70	76	189	-1.79688	3.43603	18.4321	1.76066e-05	0.000852505
chr1:175263663:175264002	10	1	2	66	18	11	-3.12562	1.58582	18.4194	1.77244e-05	0.000857443
chr14:118861058:118861751	20	6	5	31	19	105	-2.32696	2.16058	18.4122	1.77917e-05	0.000859927
chr10:122288874:122289230	11	9	4	22	26	62	-2.21959	1.83094	18.394	1.79624e-05	0.0008674
chr14:69338738:69339823	38	15	23	86	43	90	-1.63327	2.89575	18.3922	1.79795e-05	0.000867453
chr2:31024319:31025104	161	51	61	270	146	305	-1.56996	4.59631	18.3819	1.80767e-05	0.00087136
chr4:54957805:54958304	4	4	13	38	16	50	-2.25975	1.72104	18.3552	1.83314e-05	0.00088285
chr10:92881206:92882158	184	62	78	257	186	385	-1.51802	4.8148	18.3511	1.83718e-05	0.000883219
chr1:73221707:73222068	12	6	2	26	47	28	-2.66089	1.84235	18.3521	1.83619e-05	0.000883219
chr11:70002565:70003306	69	23	37	105	112	146	-1.72657	3.67505	18.3337	1.85402e-05	0.00088983
chr2:27543544:27543838	19	7	4	31	26	58	-2.0581	1.91917	18.3318	1.85587e-05	0.00088983
chr6:115294158:115294520	23	6	9	28	32	97	-2.14063	2.28116	18.3334	1.85428e-05	0.00088983
chr7:71384541:71385232	40	15	22	71	49	98	-1.62701	2.901	18.3272	1.86028e-05	0.00089115
chr10:89286714:89288256	144	224	155	53	23	66	2.02438	4.13916	18.3246	1.86291e-05	0.000891619
chr14:104202971:104203751	41	7	25	96	47	89	-1.85113	2.93623	18.3094	1.8778e-05	0.000897951
chr5:44211440:44211655	12	4	3	28	34	23	-2.45338	1.598	18.3038	1.88333e-05	0.000899799
chr10:118248009:118248661	27	0	13	55	29	102	-2.3806	2.45374	18.2876	1.89939e-05	0.000905069
chr15:84102816:84103558	21	7	10	53	13	190	-2.63207	2.71808	18.2886	1.89836e-05	0.000905069
chr5:97451128:97452112	52	12	52	225	81	128	-2.06333	3.78991	18.2897	1.89727e-05	0.000905069
chr19:32130155:32130679	19	9	21	114	34	53	-2.12155	2.69623	18.2843	1.90271e-05	0.000905851
chr5:3502578:3503302	28	6	8	46	29	69	-1.9328	2.23386	18.2762	1.91077e-05	0.000908888
chr1:64347806:64348874	47	20	51	214	78	119	-1.91119	3.74825	18.2721	1.91492e-05	0.000910058
chr14:21322216:21322477	11	9	3	28	31	39	-2.21554	1.76172	18.2624	1.92466e-05	0.000913885
chr17:47853305:47853778	14	6	10	20	29	97	-2.29308	2.14471	18.2562	1.93094e-05	0.000915645
chr1:94111673:94112312	43	16	17	92	66	74	-1.83631	3.02014	18.2554	1.93176e-05	0.000915645
chr6:122775168:122775644	25	10	18	54	30	85	-1.72818	2.47834	18.2458	1.94151e-05	0.000918822
chr8:111604958:111605460	22	6	8	36	19	123	-2.29191	2.336	18.2455	1.94187e-05	0.000918822
chr1:39728270:39728661	22	3	2	21	29	147	-2.96756	2.39706	18.2264	1.96142e-05	0.00092726
chr7:142015612:142016063	15	14	4	57	31	49	-2.11073	2.1911	18.2138	1.97447e-05	0.000932611
chr3:102057249:102057755	18	6	11	31	36	55	-1.96591	2.07261	18.2117	1.97662e-05	0.000932811
chr13:111481101:111481576	10	2	5	23	11	44	-2.23201	1.31796	18.2082	1.98025e-05	0.000933712
chr11:72271376:72272101	71	4	14	148	74	162	-2.43552	3.51945	18.1928	1.99636e-05	0.000940483
chr15:61230378:61230852	20	2	0	45	40	34	-2.85131	1.96294	18.1794	2.01037e-05	0.000946259
chr10:39170814:39171386	60	28	25	113	68	133	-1.59206	3.42378	18.1723	2.01798e-05	0.000948185
chr14:71023173:71024776	152	53	59	221	138	349	-1.54967	4.54794	18.1737	2.01646e-05	0.000948185
chr1:107763220:107763892	86	43	49	207	105	168	-1.55647	4.05688	18.167	2.02357e-05	0.000949404
chr7:143531645:143531946	14	0	0	38	16	26	-2.7912	1.34947	18.1665	2.02409e-05	0.000949404
chr12:40566560:40567027	30	11	5	46	32	118	-2.15306	2.55781	18.1512	2.04042e-05	0.000955584
chr8:129438508:129439188	35	12	16	64	28	181	-2.08524	2.95872	18.1508	2.0408e-05	0.000955584
chr8:111215183:111215705	34	6	21	70	51	71	-1.88126	2.71536	18.1453	2.04674e-05	0.000957534
chr9:102933817:102935064	67	29	42	118	64	291	-1.75971	3.83499	18.1325	2.06059e-05	0.00096318
chr18:65121995:65122564	24	10	8	56	23	67	-1.86676	2.24676	18.127	2.06649e-05	0.000965101
chr5:32630303:32630974	71	19	24	152	76	114	-1.81107	3.52106	18.1144	2.08018e-05	0.000970656
chr10:99211268:99211772	12	5	7	42	15	37	-2.03421	1.6451	18.0891	2.10801e-05	0.000982793
chr12:74755932:74756392	20	6	5	46	36	34	-2.15977	2.01328	18.0858	2.11173e-05	0.000983678
chr8:94513760:94514720	75	47	49	138	97	243	-1.51411	4.00345	18.0824	2.11553e-05	0.000984596
chr1:34388340:34389081	114	53	51	18	12	32	1.72562	2.77343	18.075	2.12371e-05	0.000987552
chr19:30016906:30017194	17	0	5	69	31	21	-2.82043	1.96789	18.0683	2.13116e-05	0.000990163
chr19:40381526:40382698	231	115	121	408	272	457	-1.41755	5.32874	18.0662	2.1336e-05	0.000990445
chr11:103610911:103611481	22	13	12	50	54	55	-1.94916	2.50076	18.06	2.14048e-05	0.000992785
chr6:13063525:13064245	18	15	24	71	42	77	-1.77534	2.69118	18.0581	2.1426e-05	0.000992914
chr9:107627751:107628489	32	7	14	52	26	156	-2.15872	2.73862	18.0489	2.15298e-05	0.000996869
chr14:106772050:106772899	119	55	58	28	10	30	1.69275	2.86681	18.0398	2.1634e-05	0.00100084
chr1:17023994:17024228	14	0	0	28	11	46	-2.76241	1.34661	18.0281	2.17664e-05	0.00100524
chr9:65387441:65387911	17	9	15	47	31	55	-1.7877	2.20074	18.0286	2.17615e-05	0.00100524
chr1:75584124:75585170	127	58	80	25	22	29	1.63967	3.07811	18.0236	2.18187e-05	0.00100679
chr11:86583391:86583700	5	4	3	25	16	18	-2.39393	1.06315	18.0099	2.19758e-05	0.00101231
chr6:93144770:93145180	20	3	0	61	33	31	-2.78757	2.0045	18.0103	2.19711e-05	0.00101231
chr13:9180303:9180652	11	6	9	34	17	47	-1.94431	1.70771	17.9951	2.21473e-05	0.00101934
chr8:13562060:13562514	20	12	17	59	45	54	-1.82831	2.48175	17.9804	2.23191e-05	0.00102638
chr8:55478853:55479518	26	6	23	110	89	40	-2.46553	3.04952	17.9783	2.23433e-05	0.00102661
chr4:142868268:142868710	30	13	8	37	45	131	-2.1333	2.70952	17.9758	2.23737e-05	0.00102713
chr3:145488028:145488552	32	9	3	77	40	60	-2.24237	2.51621	17.9596	2.25638e-05	0.00103367
chr7:132709118:132709748	41	11	24	108	44	82	-1.7759	2.96391	17.9597	2.25628e-05	0.00103367
chr8:25530818:25531213	26	4	17	58	55	51	-2.09916	2.51575	17.9588	2.25734e-05	0.00103367
chr6:117391338:117391914	15	2	7	32	28	31	-2.16076	1.66727	17.9542	2.26285e-05	0.00103531
chr2:30553359:30553771	14	0	7	40	26	25	-2.39395	1.63158	17.9505	2.26724e-05	0.00103556
chr6:145577300:145577631	14	5	9	25	22	62	-2.01679	1.8263	17.9512	2.26643e-05	0.00103556
chr4:102464493:102465403	90	29	28	147	92	173	-1.67328	3.79314	17.9486	2.26949e-05	0.00103572
chr9:56113664:56114866	143	45	75	249	120	308	-1.48474	4.49598	17.9453	2.27345e-05	0.00103665
chr2:167678761:167679366	30	10	15	58	29	86	-1.73056	2.50236	17.9413	2.2782e-05	0.00103794
chr10:60390769:60391875	75	28	14	84	102	410	-2.39932	4.05004	17.9366	2.28386e-05	0.00103876
chr4:45741758:45742657	46	18	6	140	40	125	-2.21829	3.18724	17.9376	2.2827e-05	0.00103876
chr2:102059791:102060450	40	8	12	107	30	83	-2.03183	2.77801	17.9241	2.29893e-05	0.00104473
chr17:91789429:91789925	15	8	17	96	32	40	-2.16842	2.46244	17.9156	2.30925e-05	0.00104813
chr5:24480840:24481112	8	3	5	44	17	17	-2.42668	1.40635	17.9147	2.31028e-05	0.00104813
chr8:55864729:55865189	25	18	12	55	37	92	-1.76882	2.60828	17.9072	2.31942e-05	0.00105139
chr14:120417528:120417993	21	6	13	34	25	102	-2.0332	2.2974	17.8949	2.33448e-05	0.00105733
chr14:48438238:48438895	36	20	19	71	41	117	-1.64445	2.91733	17.8921	2.33785e-05	0.00105783
chr9:64354411:64355134	48	7	16	101	53	79	-1.98283	2.94545	17.8908	2.3395e-05	0.00105783
chr9:43078863:43079250	10	4	5	33	20	24	-2.16499	1.43093	17.8833	2.34867e-05	0.00106109
chr15:53449532:53450015	28	9	10	34	35	124	-2.09792	2.54865	17.877	2.35646e-05	0.00106317
chr3:27875882:27876282	22	8	13	62	29	49	-1.83248	2.25683	17.8764	2.35721e-05	0.00106317
chr14:50213270:50213634	56	21	26	6	2	15	2.09017	1.66243	17.8514	2.38848e-05	0.00107637
chr16:11044761:11045067	13	2	2	30	18	25	-2.30398	1.31809	17.8325	2.41223e-05	0.00108617
chr2:132546493:132547365	46	6	32	179	64	87	-2.20521	3.39047	17.824	2.42306e-05	0.00108946
chr8:3215292:3216050	117	52	44	244	114	232	-1.59024	4.3072	17.8236	2.42357e-05	0.00108946
chr1:192262357:192263188	31	6	14	82	30	61	-1.92939	2.50027	17.8134	2.43656e-05	0.00109406
chr15:34897097:34897464	23	4	0	41	22	96	-2.69125	2.17214	17.8124	2.43787e-05	0.00109406
chr5:139577780:139577971	6	0	1	4	15	42	-3.21619	0.916405	17.8067	2.44522e-05	0.00109645
chr3:97445797:97446551	180	93	109	44	20	66	1.52296	3.62591	17.7893	2.46765e-05	0.00110559
chr1:191679010:191679433	35	3	5	83	48	51	-2.45866	2.55925	17.7872	2.4704e-05	0.0011059
chr10:21356471:21357081	42	6	12	49	43	153	-2.17771	2.86085	17.7822	2.47692e-05	0.0011079
chr5:67148157:67148743	50	19	18	69	50	204	-1.92208	3.27723	17.7766	2.48424e-05	0.00111026
chr1:60955499:60955985	25	7	5	33	44	61	-2.14741	2.22435	17.7649	2.4995e-05	0.00111615
chr5:45683453:45684028	127	47	36	227	116	268	-1.68101	4.31802	17.7631	2.50184e-05	0.00111627
chr1:195915935:195916593	46	18	16	91	63	83	-1.76842	3.04324	17.7591	2.50719e-05	0.00111677
chr15:39863536:39864197	88	60	39	202	105	255	-1.61248	4.21087	17.7578	2.50882e-05	0.00111677
chr8:75545850:75546380	64	25	38	11	6	16	1.83435	2.00574	17.7576	2.50914e-05	0.00111677
chr2:167685753:167686676	61	46	55	132	97	260	-1.58225	4.00817	17.7539	2.51396e-05	0.00111799
chr15:85765986:85766411	18	21	4	64	36	117	-2.24213	2.70796	17.7419	2.52993e-05	0.00112416
chr12:8942107:8942449	17	4	3	25	23	47	-2.14564	1.65685	17.7307	2.54482e-05	0.00112985
chr5:125064654:125065079	29	6	8	53	27	65	-1.91153	2.24512	17.7284	2.5479e-05	0.00113029
chr16:69796539:69796947	31	9	8	62	22	100	-1.99652	2.48264	17.7233	2.55485e-05	0.00113244
chr3:82112580:82112985	26	0	2	48	40	56	-2.77036	2.17326	17.7212	2.55754e-05	0.0011327
chr5:58159762:58160209	23	8	8	59	29	44	-1.92158	2.16963	17.6763	2.61864e-05	0.00115798
chr6:97297034:97297283	10	4	6	24	14	44	-2.06883	1.43524	17.6762	2.6189e-05	0.00115798
chr7:83576922:83577239	19	0	9	27	23	103	-2.5531	2.12765	17.6716	2.62512e-05	0.00115978
chr16:57446318:57447373	61	23	28	106	110	109	-1.80554	3.54149	17.6647	2.63471e-05	0.00116264
chr16:95624988:95625401	26	6	6	38	24	86	-2.05978	2.19497	17.6638	2.63591e-05	0.00116264
chr9:122016789:122017453	42	23	24	83	73	97	-1.66362	3.16963	17.6514	2.65324e-05	0.00116933
chr2:32589959:32590887	85	49	53	165	117	196	-1.46228	4.08054	17.6451	2.66193e-05	0.00117187
chr5:123940018:123940240	12	2	0	25	11	34	-2.43558	1.17111	17.6441	2.66335e-05	0.00117187
chr3:122883657:122884407	89	58	68	26	13	28	1.63335	2.83538	17.6359	2.6749e-05	0.00117579
chr6:72483593:72483866	14	6	3	42	21	29	-2.14851	1.65161	17.6347	2.6766e-05	0.00117579
chr4:131278090:131278427	14	3	9	35	24	34	-2.00426	1.69356	17.6258	2.68919e-05	0.00118036
chr5:30893606:30894057	18	4	3	39	27	31	-2.20023	1.73593	17.6187	2.6992e-05	0.00118379
chr7:116744182:116744593	26	24	23	8	1	6	2.27935	1.29437	17.615	2.70448e-05	0.00118418
chr9:32333252:32333920	46	13	37	140	36	179	-1.90064	3.4053	17.6152	2.70419e-05	0.00118418
chr18:36047073:36048350	82	45	82	181	106	300	-1.50461	4.27603	17.6083	2.71402e-05	0.00118643
chr5:145079158:145079606	33	4	8	75	49	45	-2.26124	2.50875	17.6096	2.71215e-05	0.00118643
chr16:31326297:31327111	36	12	5	70	47	72	-2.05058	2.64728	17.6045	2.71942e-05	0.00118783
chr4:56049094:56049467	14	3	5	54	35	16	-2.5778	1.85777	17.5987	2.72778e-05	0.00119052
chr14:102728819:102728983	7	4	2	70	52	4	-3.60797	2.07716	17.5954	2.73243e-05	0.00119158
chr14:68163960:68164198	14	0	4	42	15	26	-2.41644	1.43965	17.5822	2.75145e-05	0.00119891
chrX:68984375:68984590	11	1	1	26	17	19	-2.48859	1.09931	17.5753	2.76154e-05	0.00120234
chr5:97351049:97351278	9	8	4	24	17	50	-2.10471	1.57652	17.5695	2.77001e-05	0.00120506
chr13:56672798:56673699	38	9	23	61	42	112	-1.73335	2.8137	17.5619	2.78104e-05	0.0012082
chr3:150986701:150987260	64	38	30	171	104	121	-1.73995	3.78853	17.5614	2.78172e-05	0.0012082
chr10:85869445:85870243	98	25	49	169	79	229	-1.59495	3.95198	17.5197	2.84339e-05	0.0012322
chr15:93458443:93459225	52	15	28	84	87	101	-1.77653	3.26986	17.5195	2.84381e-05	0.0012322
chr8:84551276:84551553	13	8	4	41	20	35	-2.02893	1.71089	17.5199	2.8432e-05	0.0012322
chr13:11575397:11575814	25	8	3	37	52	56	-2.30836	2.30613	17.5128	2.85373e-05	0.0012355
chr14:32235997:32236887	85	43	50	135	124	203	-1.51487	4.02903	17.5081	2.86085e-05	0.00123759
chr5:20772105:20772590	11	8	16	46	42	42	-2.03607	2.2003	17.5014	2.87101e-05	0.00124
chr6:21975663:21976095	6	3	14	37	19	43	-2.13124	1.70818	17.502	2.87e-05	0.00124
chr17:73417618:73418239	18	8	5	40	37	36	-2.08726	1.99739	17.4967	2.87809e-05	0.00124207
chr1:137560493:137560925	13	6	4	37	12	46	-2.07026	1.6127	17.485	2.89583e-05	0.00124872
chr6:136841252:136841699	25	3	11	60	24	53	-1.98399	2.1615	17.4729	2.91431e-05	0.00125569
chr7:20329992:20330669	47	19	5	68	68	185	-2.29271	3.26451	17.4663	2.92452e-05	0.00125908
chr18:65144737:65145229	25	0	8	47	33	52	-2.299	2.10073	17.4634	2.92897e-05	0.00125999
chr11:78873217:78873843	23	21	14	69	63	68	-1.90891	2.81824	17.4577	2.9377e-05	0.00126051
chr2:115846675:115847127	26	8	4	33	30	103	-2.21616	2.32734	17.4565	2.93951e-05	0.00126051
chr2:147730642:147731411	231	124	106	44	30	75	1.5641	3.88211	17.4611	2.93251e-05	0.00126051
chr4:100067763:100068550	175	63	116	39	22	53	1.52026	3.4787	17.4584	2.93671e-05	0.00126051
chr2:132107780:132108233	22	6	10	52	40	37	-2.0154	2.18741	17.4541	2.94332e-05	0.00126114
chr6:17503334:17503578	7	0	4	7	17	49	-2.81315	1.1791	17.4405	2.96442e-05	0.00126918
chr12:78157741:78158127	32	21	19	0	4	9	2.39301	1.22703	17.4178	3.00008e-05	0.00128343
chr13:94832597:94833454	68	16	26	138	42	205	-1.87991	3.51988	17.4115	3.00992e-05	0.00128662
chr7:120614076:120614519	20	8	10	65	27	40	-1.93407	2.16658	17.3997	3.02869e-05	0.00129259
chr8:116259255:116259894	55	8	18	113	67	82	-2.00326	3.13519	17.3998	3.02865e-05	0.00129259
chr2:114927228:114927560	12	5	0	36	32	20	-2.6623	1.60803	17.3776	3.06413e-05	0.00130668
chr5:15140959:15141276	30	7	9	55	34	57	-1.86571	2.31041	17.3669	3.08142e-05	0.00131302
chr17:43474631:43474863	13	3	2	38	16	24	-2.28847	1.39603	17.365	3.08456e-05	0.00131332
chr2:158868610:158868925	18	6	1	44	33	31	-2.37782	1.87945	17.3492	3.11022e-05	0.0013232
chr5:124690915:124691868	88	40	39	258	90	160	-1.72545	4.07137	17.3438	3.11911e-05	0.00132594
chr11:49000461:49001039	24	2	5	46	13	129	-2.64867	2.32861	17.3422	3.12176e-05	0.00132602
chr13:113249921:113250331	22	3	6	62	29	31	-2.24837	2.02996	17.3331	3.13669e-05	0.00132923
chr6:126328592:126329037	30	10	14	86	29	62	-1.83229	2.54816	17.3334	3.13634e-05	0.00132923
chr6:94606084:94606432	19	0	0	55	18	44	-2.91701	1.80027	17.3339	3.13547e-05	0.00132923
chr15:76520669:76521131	27	9	4	102	31	44	-2.33564	2.49018	17.331	3.14028e-05	0.00132971
chr5:111938044:111939311	88	7	22	243	114	121	-2.43038	3.91726	17.3218	3.15545e-05	0.00133508
chr4:8446332:8446482	5	2	0	33	15	6	-3.14317	0.897577	17.32	3.1584e-05	0.00133528
chr3:107680588:107681157	35	7	11	76	48	51	-2.00839	2.58679	17.3172	3.16303e-05	0.00133619
chr14:12969067:12969322	12	1	1	29	18	19	-2.4949	1.18231	17.2937	3.20255e-05	0.00135183
chr14:31985585:31986660	156	81	112	293	150	452	-1.37971	4.89987	17.2917	3.20588e-05	0.00135218
chr2:27994069:27994709	24	16	7	66	75	48	-2.26798	2.74641	17.2705	3.24183e-05	0.00136627
chr5:36072469:36072847	16	10	19	74	20	78	-1.9016	2.43776	17.2682	3.24569e-05	0.00136683
chr12:31955886:31956880	114	44	73	174	121	273	-1.40861	4.29098	17.2425	3.28988e-05	0.00138437
chr1:133839154:133839709	17	6	12	27	21	153	-2.4304	2.45794	17.2403	3.29371e-05	0.0013849
chr10:98920588:98920944	20	6	5	33	17	81	-2.11051	1.99288	17.2386	3.29668e-05	0.00138507
chr19:34427374:34428443	60	18	15	188	56	96	-2.06101	3.43089	17.2136	3.34039e-05	0.00140234
chr5:124660738:124661037	14	0	12	51	20	38	-2.22766	1.82629	17.21	3.34668e-05	0.00140389
chr1:9795469:9796134	37	18	21	72	61	81	-1.6593	2.93265	17.2084	3.34947e-05	0.00140397
chr10:95340374:95341473	180	81	123	338	183	376	-1.32569	4.97734	17.1955	3.37242e-05	0.00141031
chr9:110895666:110896284	48	13	25	117	80	69	-1.91327	3.22449	17.1975	3.36873e-05	0.00141031
chr9:66374064:66374913	88	36	83	12	10	34	1.83977	2.68884	17.1969	3.36982e-05	0.00141031
chr15:54652189:54652847	31	22	22	55	69	118	-1.77921	3.05197	17.1854	3.3903e-05	0.00141668
chr4:145749233:145749459	10	2	2	15	17	31	-2.31446	1.10951	17.1612	3.43384e-05	0.00143266
chr7:78515689:78515948	8	2	8	33	17	24	-2.16049	1.3614	17.1626	3.43121e-05	0.00143266
chr1:164565140:164566517	438	512	731	156	105	264	1.75534	5.81682	17.1569	3.44155e-05	0.00143477
chr9:48593037:48593437	22	9	6	44	20	70	-1.90623	2.10111	17.1523	3.44999e-05	0.00143718
chr3:29438081:29438442	21	2	6	35	28	41	-2.09196	1.82338	17.1485	3.45683e-05	0.00143892
chr2:84969476:84970200	38	29	11	109	73	96	-1.9437	3.23381	17.1435	3.46593e-05	0.00144159
chr17:12808976:12809357	9	0	7	20	17	31	-2.22633	1.21814	17.1232	3.50311e-05	0.00145593
chr3:51105514:51105931	24	9	11	40	28	73	-1.76454	2.2329	17.1183	3.51222e-05	0.0014586
chr11:120491200:120492678	80	45	37	193	93	164	-1.57335	3.9473	17.116	3.51656e-05	0.00145928
chr17:28552041:28552673	53	22	31	131	86	87	-1.73484	3.43347	17.1057	3.53564e-05	0.0014632
chr18:39065831:39066363	36	5	14	80	58	50	-2.11402	2.69735	17.1069	3.53343e-05	0.0014632
chr1:95898493:95898852	27	0	3	54	22	84	-2.65414	2.20308	17.1091	3.52929e-05	0.0014632
chr6:72469838:72470459	38	9	20	86	39	74	-1.73472	2.74673	17.105	3.53685e-05	0.0014632
chr8:109362805:109363531	58	25	28	82	66	166	-1.5874	3.38961	17.0922	3.56073e-05	0.00147195
chr17:75274949:75275330	8	4	5	42	17	18	-2.30355	1.40774	17.0902	3.56454e-05	0.0014724
chr6:55244421:55245213	106	48	51	251	108	192	-1.55211	4.23499	17.0885	3.56776e-05	0.0014726
chr9:48134417:48134736	11	3	4	24	12	38	-2.10046	1.29494	17.0531	3.63499e-05	0.00149921
chr3:36653303:36653722	9	4	6	25	13	38	-2.03493	1.353	17.0474	3.64578e-05	0.00150251
chr11:105959356:105960066	37	10	29	66	73	90	-1.82293	3.00998	17.0372	3.66546e-05	0.00150946
chr5:54361193:54361911	65	39	45	142	111	143	-1.5536	3.83201	17.0305	3.67837e-05	0.00151363
chr8:25537958:25538482	36	13	9	90	72	48	-2.17421	2.8787	17.0185	3.70168e-05	0.00152206
chr13:81271998:81272943	314	114	210	75	42	105	1.41641	4.33757	17.017	3.70474e-05	0.00152216
chr8:123211733:123211993	14	2	2	11	23	74	-2.71233	1.68316	17.0153	3.70793e-05	0.00152231
chr4:148050221:148051068	54	17	31	98	46	145	-1.57948	3.23969	17.0086	3.72113e-05	0.00152657
chr19:40476622:40477384	45	18	26	100	42	106	-1.56153	3.06135	17.0066	3.72493e-05	0.00152697
chr9:30263867:30264281	17	2	11	104	30	23	-2.62712	2.31831	17.0031	3.73197e-05	0.00152869
chr4:11933293:11933730	13	4	4	46	16	25	-2.19186	1.55051	16.997	3.74391e-05	0.00152915
chr4:56853093:56853896	48	3	18	70	53	131	-2.12005	2.97754	16.9967	3.74442e-05	0.00152915
chr4:63577392:63577648	9	4	3	35	21	16	-2.36046	1.34724	17.0001	3.73771e-05	0.00152915
chr7:86456406:86456694	8	1	6	24	10	32	-2.18969	1.13606	16.9986	3.74071e-05	0.00152915
chr6:54008757:54009426	27	26	26	141	46	95	-1.82434	3.20487	16.9897	3.75831e-05	0.0015325
chr7:79310516:79311605	140	68	69	243	143	288	-1.38927	4.55622	16.9898	3.75819e-05	0.0015325
chr1:74766472:74766625	4	4	0	54	21	5	-3.45151	1.38614	16.9841	3.76932e-05	0.00153583
chr1:133844626:133845147	49	4	6	69	40	201	-2.57728	3.07943	16.9747	3.7882e-05	0.00154236
chr4:138798332:138799002	31	9	12	51	27	91	-1.78042	2.44164	16.9478	3.84228e-05	0.0015632
chr14:119232296:119232843	23	4	16	37	33	74	-1.88145	2.25564	16.9278	3.88291e-05	0.00157617
chr14:22810427:22810920	22	6	6	70	23	37	-2.1085	2.09738	16.9283	3.88184e-05	0.00157617
chr3:10211345:10212086	50	19	33	154	56	96	-1.71406	3.36186	16.9297	3.87901e-05	0.00157617
chr7:132635990:132636449	30	6	12	99	32	46	-2.09131	2.53123	16.9179	3.90316e-05	0.0015832
chr7:141865476:141866106	37	10	14	59	47	71	-1.74777	2.62284	16.9013	3.93747e-05	0.00159592
chr1:193383642:193383987	22	2	5	57	14	53	-2.24353	1.93061	16.8915	3.95789e-05	0.00160193
chr2:61133263:61134003	42	20	16	76	51	94	-1.62738	2.93286	16.8913	3.95824e-05	0.00160193
chr12:55610786:55611301	67	27	22	106	93	127	-1.70345	3.51352	16.8872	3.96691e-05	0.00160424
chr7:123346762:123347783	78	38	30	240	89	134	-1.7997	3.94335	16.8548	4.03509e-05	0.00162943
chr9:88171861:88172233	15	6	11	23	51	51	-2.214	2.14332	16.8547	4.03525e-05	0.00162943
chr5:31867279:31867847	18	20	14	57	49	72	-1.82722	2.6299	16.8497	4.04601e-05	0.00163256
chr16:58377218:58378388	62	47	46	124	102	208	-1.52431	3.90058	16.848	4.04968e-05	0.00163282
chr2:68738808:68739418	32	25	12	92	57	81	-1.82904	2.97881	16.8434	4.05944e-05	0.00163553
chr5:108766143:108766933	284	84	170	57	29	86	1.53047	4.03588	16.8393	4.06811e-05	0.0016378
chr4:142661631:142661793	3	1	5	23	3	35	-2.6488	0.916636	16.8346	4.07823e-05	0.00164065
chr5:76540211:76540484	11	1	2	23	18	20	-2.35342	1.10323	16.8332	4.08139e-05	0.0016407
chr18:47194903:47195360	11	3	7	32	19	27	-2.0346	1.45293	16.8305	4.0872e-05	0.0016415
chr9:14363938:14364159	10	2	2	14	17	32	-2.31229	1.10695	16.8294	4.08946e-05	0.0016415
chr3:57965725:57966819	188	86	131	331	185	421	-1.29399	5.03385	16.8186	4.11274e-05	0.00164962
chr9:66124497:66125322	82	37	51	265	106	136	-1.72847	4.10835	16.807	4.13805e-05	0.00165854
chr7:87888727:87889433	46	11	13	80	54	75	-1.82933	2.84316	16.8029	4.14709e-05	0.00166093
chr1:62454098:62454557	20	0	4	29	16	87	-2.58958	1.90887	16.7998	4.15374e-05	0.0016612
chr2:19611754:19612109	10	6	10	22	19	73	-2.09421	1.83612	16.7969	4.16008e-05	0.0016612
chr5:122968307:122968821	23	4	16	52	31	53	-1.82953	2.21824	16.7997	4.15403e-05	0.0016612
chr7:50965213:50966651	641	265	290	133	72	217	1.42768	5.23115	16.798	4.15765e-05	0.0016612
chr6:125304300:125305659	127	59	80	277	135	241	-1.41271	4.51686	16.7952	4.16384e-05	0.00166147
chr15:58818079:58818364	12	2	7	29	12	42	-2.04396	1.4428	16.7926	4.16953e-05	0.00166251
chr18:7686688:7686981	9	7	1	35	29	19	-2.48371	1.55032	16.7901	4.17515e-05	0.00166353
chr1:193262352:193263075	34	13	2	92	46	71	-2.29367	2.736	16.7801	4.19719e-05	0.00166974
chr14:19510696:19511325	59	20	33	106	58	125	-1.49403	3.31441	16.7796	4.19818e-05	0.00166974
chr3:98363513:98364024	29	3	5	121	86	18	-3.13728	2.90574	16.7788	4.20002e-05	0.00166974
chr2:20089149:20089533	13	0	2	23	11	36	-2.36249	1.17174	16.7651	4.23052e-05	0.00168063
chr10:43958340:43958688	22	4	10	35	34	48	-1.92125	2.02745	16.7583	4.24561e-05	0.00168495
chr2:131041538:131042032	38	5	14	63	32	91	-1.8716	2.57263	16.7574	4.24763e-05	0.00168495
chr7:79307188:79307446	12	0	3	24	15	25	-2.29005	1.13131	16.7417	4.28288e-05	0.00169768
chr4:106728573:106728931	18	1	2	25	19	46	-2.30692	1.53386	16.7226	4.32634e-05	0.00171365
chr18:62307672:62308055	12	11	2	32	39	39	-2.29053	1.93911	16.714	4.34585e-05	0.00172011
chr8:86860146:86860740	40	5	9	74	36	73	-2.00437	2.56577	16.7094	4.35641e-05	0.00172303
chr3:86597537:86598157	29	11	25	46	56	102	-1.78222	2.79738	16.7019	4.37383e-05	0.00172865
chr8:11396008:11396417	24	2	0	47	19	90	-2.76835	2.13174	16.6963	4.38665e-05	0.00173245
chr18:38963885:38964412	26	6	7	60	17	68	-1.98599	2.17995	16.6935	4.39321e-05	0.00173256
chr19:5848843:5849382	34	17	21	62	37	118	-1.61652	2.83293	16.6934	4.39335e-05	0.00173256
chr8:73098646:73099149	29	12	11	112	24	64	-2.02164	2.65568	16.6918	4.39701e-05	0.00173274
chr10:56474407:56474918	26	2	7	48	14	139	-2.56595	2.42815	16.6892	4.40309e-05	0.00173387
chr8:90420261:90420827	37	24	20	100	31	172	-1.82475	3.1859	16.6867	4.40884e-05	0.00173487
chr15:79266832:79267347	22	7	13	53	25	52	-1.74337	2.15195	16.6843	4.4144e-05	0.0017358
chr2:168483957:168484500	38	12	8	49	55	87	-1.94515	2.69092	16.6624	4.46579e-05	0.00175472
chr14:22091662:22092111	13	0	7	37	16	28	-2.1969	1.44484	16.6458	4.50489e-05	0.00176778
chr14:59588117:59588424	13	3	0	29	24	21	-2.49473	1.36243	16.6456	4.50557e-05	0.00176778
chr10:92760482:92761441	102	63	69	163	165	292	-1.50339	4.44167	16.6423	4.51323e-05	0.00176822
chr7:144492897:144493369	27	15	11	78	38	54	-1.80784	2.55155	16.6434	4.51063e-05	0.00176822
chr18:57711964:57712479	16	1	2	36	27	21	-2.50037	1.53332	16.6404	4.51784e-05	0.00176874
chr11:120917520:120917862	14	2	11	18	31	66	-2.2321	1.89843	16.6298	4.54326e-05	0.0017774
chr16:25052880:25053280	19	8	7	31	36	47	-1.9323	2.00963	16.6202	4.56614e-05	0.00178506
chr16:18727889:18728336	33	3	2	56	34	75	-2.40836	2.34649	16.6173	4.57308e-05	0.00178648
chr17:46022437:46022956	26	15	20	64	40	70	-1.60245	2.61361	16.6039	4.6056e-05	0.00179788
chr5:97350100:97350338	15	6	1	29	19	40	-2.12048	1.55856	16.5742	4.67834e-05	0.00182496
chr11:32288113:32288455	18	3	6	30	12	93	-2.3226	1.95014	16.567	4.6961e-05	0.00183056
chr5:143723299:143724030	30	9	11	41	31	92	-1.80918	2.40963	16.5641	4.70325e-05	0.00183203
chr11:117820904:117821550	33	3	14	82	25	75	-2.03035	2.50756	16.552	4.7333e-05	0.0018414
chr14:54852521:54853848	150	58	90	248	121	398	-1.41638	4.65521	16.5517	4.73414e-05	0.0018414
chr8:107432833:107433798	103	200	255	49	17	78	2.16805	4.21124	16.5423	4.7577e-05	0.00184924
chr12:103002999:103003511	48	15	32	65	56	195	-1.78474	3.29857	16.5347	4.7768e-05	0.00185417
chr18:35258242:35258601	28	4	8	32	35	74	-2.02819	2.20635	16.5345	4.77728e-05	0.00185417
chr5:104540987:104541581	33	16	25	75	41	87	-1.5355	2.81536	16.5271	4.79587e-05	0.00186005
chr6:120976156:120976736	52	5	11	87	35	154	-2.19525	3.00224	16.5189	4.8168e-05	0.00186683
chr6:28269081:28270131	59	36	26	188	130	91	-1.97848	3.84925	16.5166	4.82256e-05	0.00186772
chr1:191948894:191949232	19	8	0	38	21	71	-2.33411	1.98684	16.5017	4.86057e-05	0.00188109
chr9:60358569:60359133	28	19	14	49	40	117	-1.76062	2.74118	16.4893	4.89257e-05	0.00189212
chr7:89319502:89319834	16	12	4	46	16	77	-2.06028	2.09423	16.4823	4.91051e-05	0.0018977
chr6:53420413:53420893	27	7	12	39	35	66	-1.77038	2.26509	16.4607	4.96681e-05	0.00191808
chr3:144063863:144064553	21	23	9	96	35	79	-1.95547	2.76092	16.4568	4.97719e-05	0.00192072
chr11:98307488:98307837	22	4	5	40	28	38	-2.01266	1.87097	16.4455	5.00684e-05	0.00192665
chr14:20967080:20967311	13	2	2	26	8	49	-2.32955	1.34898	16.4469	5.00329e-05	0.00192665
chr5:30327254:30327912	40	2	20	109	32	110	-2.18833	2.90759	16.4464	5.00445e-05	0.00192665
chr8:97054473:97055008	31	4	16	51	28	94	-1.8791	2.45066	16.448	5.00017e-05	0.00192665
chr12:74778876:74779381	27	9	10	44	37	57	-1.76554	2.27413	16.4323	5.04187e-05	0.00193875
chr11:82379426:82379942	14	6	8	49	25	27	-2.01064	1.82428	16.4291	5.05032e-05	0.00194062
chr19:35998658:35999249	44	1	8	48	57	179	-2.70406	3.00541	16.4055	5.11378e-05	0.00196361
chr10:76985995:76986494	24	12	22	43	42	99	-1.72423	2.62474	16.3984	5.13291e-05	0.00196955
chr19:5921732:5922473	41	8	11	63	30	111	-1.88785	2.66374	16.395	5.1422e-05	0.00197171
chr3:102186734:102188069	131	21	49	181	117	282	-1.75096	4.22246	16.3844	5.17082e-05	0.00198128
chr7:77967174:77967724	22	14	20	60	28	87	-1.64313	2.53831	16.3643	5.22599e-05	0.002001
chr15:93732021:93732780	28	24	14	72	58	80	-1.76129	2.88008	16.3556	5.25009e-05	0.0020088
chr9:121162919:121163526	37	9	14	63	32	82	-1.6969	2.55732	16.3498	5.26614e-05	0.00201352
chr1:153404041:153404384	19	0	2	50	23	27	-2.59857	1.69873	16.3319	5.31622e-05	0.00203122
chr8:11279141:11279861	90	22	56	132	95	218	-1.5592	3.90119	16.3242	5.33783e-05	0.00203804
chr2:93108858:93109331	28	9	10	40	36	67	-1.76509	2.29841	16.3179	5.35556e-05	0.00204192
chr5:20835424:20836369	36	6	23	40	52	175	-2.13802	2.99554	16.3185	5.35389e-05	0.00204192
chr1:40228468:40229162	42	20	20	84	58	81	-1.60274	2.98971	16.3151	5.36355e-05	0.00204352
chr17:48624215:48624583	38	17	27	8	0	11	2.07573	1.39713	16.3133	5.36865e-05	0.00204402
chr5:74152980:74153223	10	5	6	21	16	44	-1.98519	1.44899	16.302	5.40078e-05	0.00205481
chr7:148157036:148158125	104	53	79	302	110	225	-1.50539	4.43209	16.2911	5.43181e-05	0.00206516
chr6:53553764:53554582	25	8	32	72	54	79	-1.80573	2.82123	16.2778	5.47016e-05	0.00207812
chr6:72104015:72104319	22	10	4	34	30	64	-1.94574	2.09345	16.2766	5.4736e-05	0.00207812
chr3:21894456:21895326	104	54	44	239	117	189	-1.55791	4.23498	16.274	5.48108e-05	0.0020795
chr13:81473090:81473755	32	6	14	56	49	53	-1.8856	2.48177	16.2669	5.5017e-05	0.00208468
chr2:158608563:158609026	32	6	4	39	33	90	-2.13348	2.33964	16.2666	5.50247e-05	0.00208468
chr2:152153732:152154051	9	9	1	18	20	68	-2.417	1.70382	16.2525	5.54367e-05	0.00209824
chr5:116353694:116354012	9	1	4	28	20	14	-2.39656	1.15474	16.2517	5.54604e-05	0.00209824
chr2:59807187:59807450	8	6	6	43	19	21	-2.15114	1.53445	16.2476	5.55791e-05	0.00210126
chr4:57770863:57771230	32	7	6	61	41	48	-2.01859	2.36284	16.2462	5.5621e-05	0.00210137
chr10:98790137:98790524	29	8	5	43	35	61	-1.93093	2.23156	16.2373	5.58834e-05	0.00210981
chr1:173113675:173114158	12	6	4	41	15	29	-2.03671	1.53478	16.2355	5.59349e-05	0.00211028
chr6:91980583:91981301	63	20	34	137	95	92	-1.72876	3.53303	16.2258	5.62228e-05	0.00211966
chr9:123337955:123338498	29	13	4	72	30	66	-1.98317	2.44682	16.2237	5.62845e-05	0.00212051
chr4:155154910:155155476	38	10	6	107	50	48	-2.21366	2.76596	16.1992	5.70182e-05	0.00214665
chr7:117421158:117421765	29	17	7	91	48	52	-2.01305	2.70281	16.1968	5.70919e-05	0.00214793
chr13:111335535:111336084	63	11	22	97	56	121	-1.72454	3.18181	16.1898	5.73012e-05	0.00215388
chr1:99783875:99784415	22	10	23	62	25	96	-1.72714	2.55294	16.1889	5.73299e-05	0.00215388
chr7:30239804:30240098	7	3	5	23	18	20	-2.16212	1.14325	16.1874	5.73752e-05	0.00215408
chr7:72948272:72948631	18	2	12	33	17	80	-2.06561	1.99045	16.1844	5.74662e-05	0.002156
chr5:113787894:113788201	25	6	2	49	39	39	-2.25636	2.11618	16.1806	5.75807e-05	0.0021588
chr17:50364180:50364485	18	3	4	25	30	36	-2.13368	1.67239	16.1753	5.77406e-05	0.00216329
chr14:28602288:28602695	19	1	5	17	26	76	-2.43142	1.86254	16.1575	5.82882e-05	0.00218229
chr11:53619135:53619951	279	121	157	68	36	101	1.36726	4.1737	16.1533	5.84171e-05	0.0021856
chr10:39105699:39106377	68	30	34	102	81	148	-1.46268	3.54663	16.1487	5.85597e-05	0.00218942
chr14:104242395:104243666	48	32	19	111	47	164	-1.68272	3.357	16.1429	5.87384e-05	0.00219458
chr2:144102620:144103018	13	10	4	42	17	43	-1.9419	1.77279	16.1351	5.89803e-05	0.00220209
chr15:79830996:79831533	25	13	9	29	36	157	-2.206	2.69056	16.1277	5.92111e-05	0.00220918
chr12:92913246:92913670	33	5	9	40	26	137	-2.19012	2.54931	16.1212	5.9414e-05	0.00221522
chr11:117843770:117844092	16	7	0	33	16	59	-2.27797	1.74183	16.1189	5.94872e-05	0.00221642
chr12:16007987:16008318	20	2	2	45	34	24	-2.49391	1.82074	16.1159	5.95805e-05	0.00221837
chr3:144267203:144267593	6	7	6	29	24	24	-2.11983	1.47459	16.1085	5.98142e-05	0.00222553
chrX:5835558:5835997	25	6	16	52	25	66	-1.70616	2.26108	16.1018	6.00271e-05	0.00223192
chr14:27984477:27984958	29	9	12	51	24	82	-1.72171	2.3543	16.1003	6.00736e-05	0.00223211
chr5:17341657:17341952	17	0	4	36	19	29	-2.25846	1.49584	16.098	6.01476e-05	0.00223332
chr19:25456310:25456955	20	9	12	69	32	36	-1.89728	2.25454	16.0517	6.1636e-05	0.00228701
chr2:125310642:125310959	20	3	9	31	34	41	-1.98257	1.90439	16.0482	6.17519e-05	0.00228974
chr10:85677032:85677455	13	2	1	17	19	32	-2.28991	1.2184	16.0417	6.19611e-05	0.00229592
chr8:118548785:118549053	12	5	3	24	10	57	-2.16452	1.49724	16.0317	6.22897e-05	0.00230651
chr15:12509031:12509286	18	4	0	48	13	46	-2.4131	1.71707	16.0289	6.23836e-05	0.00230841
chr5:20789214:20789912	29	6	13	56	18	110	-1.96707	2.45625	16.0201	6.26729e-05	0.00231753
chr13:38062837:38063159	20	5	3	46	23	33	-2.07335	1.79546	16.0187	6.27199e-05	0.00231767
chr15:78830713:78831283	30	22	6	54	42	202	-2.26677	3.07813	16.0148	6.28493e-05	0.00232087
chr1:173178541:173179347	33	22	41	86	70	119	-1.59426	3.26594	16.0005	6.33268e-05	0.0023369
chr10:104562768:104563191	31	13	7	80	51	45	-2.03204	2.61384	15.9928	6.35854e-05	0.00234263
chr2:151784942:151785334	25	7	10	48	25	54	-1.72957	2.11826	15.992	6.36123e-05	0.00234263
chr3:66002072:66002606	31	5	15	38	28	178	-2.27387	2.7607	15.9923	6.3601e-05	0.00234263
chr1:36917285:36917718	24	16	7	41	46	74	-1.89282	2.46624	15.9878	6.37511e-05	0.00234455
chr3:126318086:126318601	19	3	9	42	21	39	-1.88134	1.80502	15.9887	6.37227e-05	0.00234455
chr5:104084292:104084861	28	8	23	54	51	67	-1.7409	2.61093	15.9854	6.38344e-05	0.00234601
chr5:76296427:76296847	28	5	6	39	25	70	-1.9371	2.11422	15.984	6.38793e-05	0.00234607
chr11:114729527:114729874	11	11	1	51	18	39	-2.2348	1.8112	15.9723	6.42756e-05	0.00235639
chr13:112160119:112160494	26	2	6	33	30	58	-2.0822	1.9975	15.9718	6.42914e-05	0.00235639
chr7:111687374:111687615	12	3	3	28	81	10	-3.34011	2.15445	15.973	6.42509e-05	0.00235639
chr17:35232995:35233350	19	5	10	48	20	42	-1.81565	1.90806	15.9698	6.43618e-05	0.00235737
chr8:25531504:25532034	12	0	3	37	18	15	-2.51251	1.2653	15.9677	6.44339e-05	0.00235841
chr13:24484904:24485340	16	4	1	42	18	27	-2.24818	1.5467	15.966	6.4491e-05	0.0023589
chr13:12730821:12731327	36	8	6	64	80	45	-2.36747	2.74778	15.962	6.46281e-05	0.00236232
chr18:39279194:39280322	118	55	50	236	100	243	-1.46014	4.28795	15.9479	6.51098e-05	0.00237831
chr4:82264766:82265276	26	8	10	34	32	73	-1.78837	2.22605	15.9451	6.5206e-05	0.00238022
chr2:131034154:131034445	12	4	5	28	11	42	-1.98405	1.4179	15.9429	6.52836e-05	0.00238144
chr7:118557221:118557698	32	6	12	70	28	58	-1.81828	2.3799	15.9319	6.56629e-05	0.00239366
chr7:77672793:77673254	54	12	37	111	60	110	-1.62227	3.26382	15.9273	6.58237e-05	0.0023979
chr18:60772052:60772341	20	38	40	8	3	11	2.27043	1.75899	15.9255	6.58842e-05	0.00239849
chr18:65160053:65161360	124	42	80	221	144	218	-1.43216	4.38187	15.9233	6.59614e-05	0.00239968
chr17:79007883:79008157	14	1	5	29	9	49	-2.18199	1.44084	15.9013	6.67315e-05	0.00242606
chr10:83320589:83321829	96	21	51	169	115	154	-1.64127	3.93906	15.8961	6.69171e-05	0.0024279
chr2:118577924:118578788	18	11	16	38	31	72	-1.69212	2.26977	15.8984	6.68343e-05	0.0024279
chr3:57320066:57320389	6	2	13	28	27	31	-2.17391	1.59703	15.8965	6.69025e-05	0.0024279
chr7:139998690:139999436	38	12	13	62	47	68	-1.6972	2.63969	15.8945	6.69736e-05	0.00242832
chr2:167118800:167119177	15	4	12	40	16	50	-1.83042	1.81709	15.8747	6.76761e-05	0.00245215
chr3:115363964:115364541	61	25	23	103	62	119	-1.52096	3.30187	15.8675	6.79369e-05	0.00245829
chr7:26495005:26496088	65	20	36	168	60	113	-1.64445	3.51904	15.8679	6.79226e-05	0.00245829
chr11:49912989:49913680	35	25	22	82	54	91	-1.54685	3.00525	15.8657	6.80012e-05	0.00245897
chr2:73333880:73334284	11	6	6	37	14	33	-1.92329	1.52528	15.861	6.81683e-05	0.00246337
chr17:25216233:25216623	39	7	10	78	30	72	-1.87182	2.54851	15.8564	6.83346e-05	0.00246772
chr19:44339764:44340136	20	8	6	42	31	37	-1.88575	1.96702	15.85	6.85667e-05	0.00247445
chr12:106231000:106231341	11	3	1	13	15	43	-2.33111	1.20999	15.8468	6.86831e-05	0.002477
chr2:135599056:135599836	49	20	8	84	72	96	-1.93797	3.10137	15.8362	6.907e-05	0.00248929
chr6:125374206:125374480	13	9	7	26	26	48	-1.86207	1.80225	15.819	6.96985e-05	0.00251026
chr1:90422693:90423022	12	3	7	28	13	39	-1.92833	1.43212	15.7937	7.06383e-05	0.00254241
chr8:47984296:47984785	43	4	13	51	38	140	-2.09919	2.77741	15.789	7.08126e-05	0.00254699
chr15:83123511:83123903	23	3	5	48	18	45	-2.01642	1.85887	15.7767	7.12734e-05	0.00256186
chr12:81424479:81425288	106	24	39	188	114	148	-1.69093	3.96469	15.7671	7.16386e-05	0.00257327
chr13:59649080:59649332	18	1	3	31	14	43	-2.16452	1.50365	15.7644	7.17411e-05	0.00257524
chr17:84443628:84444348	53	33	28	90	72	144	-1.5004	3.41425	15.7605	7.18892e-05	0.00257884
chr18:7608593:7609991	347	2170	2059	282	120	461	2.72053	7.25157	15.7559	7.20622e-05	0.00258333
chr11:101912874:101913722	54	28	24	72	73	160	-1.6167	3.36749	15.7461	7.24353e-05	0.00258983
chr15:64209083:64209437	12	0	14	22	30	64	-2.30156	1.8975	15.7489	7.23284e-05	0.00258983
chr15:73420596:73421281	73	16	11	93	63	204	-2.02011	3.44451	15.7475	7.23826e-05	0.00258983
chr17:43571224:43571911	55	16	25	131	69	75	-1.75985	3.26387	15.7471	7.23973e-05	0.00258983
chr1:62711595:62711888	15	5	4	32	20	31	-1.94397	1.54387	15.7446	7.24936e-05	0.0025902
chr8:71426636:71427191	30	14	8	36	34	178	-2.21372	2.81732	15.7432	7.25486e-05	0.00259045
chr18:61773424:61774635	122	46	76	194	113	258	-1.32189	4.30304	15.736	7.28248e-05	0.00259859
chr15:27752254:27752547	16	6	4	40	21	30	-1.96535	1.66735	15.7321	7.29747e-05	0.00260222
chr6:134097996:134098428	6	2	13	34	11	53	-2.17072	1.61497	15.7256	7.32277e-05	0.00260952
chr13:103455656:103456103	16	2	2	37	23	21	-2.31512	1.49157	15.714	7.36755e-05	0.00262374
chr7:4105569:4106049	27	13	5	64	25	68	-1.87668	2.35209	15.7127	7.37281e-05	0.00262388
chr11:82762570:82763049	20	5	13	56	27	38	-1.83951	2.07408	15.7054	7.40142e-05	0.00263233
chr3:89295340:89295844	32	11	11	56	20	158	-2.07423	2.73179	15.6985	7.42842e-05	0.0026402
chr11:16491351:16491935	62	33	63	148	74	196	-1.43218	3.82349	15.6737	7.52644e-05	0.00267327
chr2:179995796:179996118	11	10	8	29	26	45	-1.84332	1.81581	15.6715	7.53511e-05	0.00267459
chr13:45550511:45550901	18	15	4	62	26	53	-1.96395	2.22471	15.6668	7.55397e-05	0.00267811
chr6:136355060:136355249	22	25	48	4	6	10	2.23268	1.6784	15.6665	7.55493e-05	0.00267811
chr8:93856857:93857200	16	9	4	43	14	53	-1.93579	1.83194	15.6582	7.58843e-05	0.00268822
chr1:45757715:45758558	103	44	78	34	10	23	1.65259	2.84085	15.6527	7.61021e-05	0.00269416
chr11:51459904:51461207	134	75	51	230	128	372	-1.52037	4.57771	15.6501	7.62104e-05	0.00269623
chr19:6476989:6477269	16	3	2	26	29	26	-2.2579	1.52748	15.6486	7.62698e-05	0.00269656
chr3:53197753:53198181	13	3	3	49	19	16	-2.37192	1.51923	15.6428	7.6505e-05	0.00270246
chr4:102257985:102258424	14	2	16	41	28	41	-1.94202	1.92971	15.642	7.65365e-05	0.00270246
chr5:141050919:141051789	132	80	73	249	132	328	-1.35097	4.60623	15.6369	7.67412e-05	0.00270791
chr10:69371190:69371680	30	15	19	58	39	76	-1.53008	2.60921	15.6243	7.72568e-05	0.00272422
chr2:92971991:92972797	75	14	29	110	66	143	-1.6411	3.41562	15.6231	7.73042e-05	0.00272422
chr19:45865139:45865342	9	4	1	24	16	19	-2.22591	1.0792	15.6191	7.74666e-05	0.00272816
chr2:129407487:129408644	193	79	74	386	144	381	-1.49071	4.91256	15.6172	7.75473e-05	0.00272922
chrX:163542079:163542544	27	8	13	57	19	81	-1.75492	2.32638	15.6063	7.79932e-05	0.00274312
chr4:138361083:138361688	115	60	77	27	16	45	1.46709	3.06232	15.5968	7.83865e-05	0.00275516
chr11:106449861:106450408	19	2	8	28	22	48	-1.92244	1.72801	15.5933	7.85308e-05	0.00275844
chr13:67030776:67031755	139	53	78	28	6	47	1.72807	3.04593	15.5908	7.86355e-05	0.00276032
chr11:22619449:22619975	48	4	17	63	49	114	-1.95223	2.856	15.5847	7.88918e-05	0.00276704
chr7:112926265:112926612	13	9	7	29	23	45	-1.80783	1.76341	15.5838	7.89294e-05	0.00276704
chr5:112712533:112712875	20	3	5	38	17	42	-1.94745	1.69427	15.5818	7.9012e-05	0.00276814
chr10:59436694:59437808	215	90	101	368	178	399	-1.32967	5.03546	15.5764	7.92388e-05	0.00277428
chr2:26399750:26400510	48	14	24	91	52	82	-1.57302	2.9847	15.5611	7.98824e-05	0.002795
chr9:65999803:66000237	25	4	6	26	34	63	-2.04405	2.03915	15.5524	8.02511e-05	0.00280609
chr3:157803391:157804137	26	14	16	69	50	48	-1.76174	2.59617	15.5488	8.04012e-05	0.00280951
chr6:90653738:90654070	8	11	5	21	22	68	-2.12982	1.82612	15.5387	8.08346e-05	0.00281919
chr7:4118292:4119165	197	124	117	56	24	80	1.45643	3.86621	15.5393	8.08061e-05	0.00281919
chr9:70686355:70687131	53	9	14	80	40	113	-1.79818	2.90132	15.5389	8.08258e-05	0.00281919
chr14:121499005:121499390	19	0	4	30	12	76	-2.47028	1.76916	15.534	8.10356e-05	0.00282174
chr18:7644609:7645223	50	15	11	72	47	107	-1.73814	2.90536	15.5326	8.10932e-05	0.00282174
chr4:123310583:123311093	54	10	16	69	44	133	-1.78106	2.97088	15.5321	8.1117e-05	0.00282174
chr4:43599232:43599799	44	24	18	102	45	96	-1.57813	3.0522	15.5356	8.09655e-05	0.00282174
chr17:84445172:84445586	34	11	4	50	34	91	-1.97359	2.48022	15.5252	8.14126e-05	0.0028302
chr11:17368424:17369272	52	16	27	84	83	87	-1.68653	3.20644	15.5155	8.18318e-05	0.00284294
chr4:96692265:96692661	29	3	4	79	26	41	-2.30345	2.22176	15.5105	8.2048e-05	0.00284862
chr5:97346603:97346980	18	6	4	53	12	45	-2.04277	1.81392	15.5052	8.22774e-05	0.00285475
chr11:95702538:95704594	257	128	175	407	258	567	-1.21862	5.45605	15.4984	8.25732e-05	0.00286171
chr16:76225303:76225698	11	11	0	64	21	35	-2.46735	1.93618	15.4982	8.25839e-05	0.00286171
chr3:10241484:10241840	16	3	0	48	20	22	-2.51375	1.57484	15.4864	8.31012e-05	0.00287779
chr11:4151331:4151678	14	14	3	49	36	39	-2.10423	2.10684	15.4833	8.32391e-05	0.00287901
chr15:73679898:73680538	32	0	17	44	41	242	-2.83297	3.09092	15.482	8.32966e-05	0.00287901
chr18:20801406:20801659	20	0	10	40	31	37	-2.14252	1.89008	15.4822	8.32872e-05	0.00287901
chr5:104053678:104054192	29	14	5	89	39	48	-2.0462	2.56075	15.4634	8.4119e-05	0.00290558
chr1:117408291:117408869	26	10	15	108	40	36	-2.0391	2.63995	15.4612	8.42151e-05	0.00290606
chr4:31848819:31849059	11	0	1	34	18	11	-2.7355	1.12176	15.4607	8.42407e-05	0.00290606
chr6:92937414:92938819	79	37	24	162	112	125	-1.72596	3.81394	15.4492	8.47508e-05	0.00292179
chr7:88223643:88223914	10	0	8	30	27	18	-2.35622	1.42829	15.4441	8.49818e-05	0.00292789
chr17:33949342:33950335	121	58	55	239	103	245	-1.40763	4.32478	15.4341	8.54344e-05	0.0029416
chr7:120603564:120604983	161	73	89	323	137	309	-1.34151	4.73472	15.4301	8.56137e-05	0.0029459
chr3:19878365:19878789	27	1	4	76	16	58	-2.45274	2.15988	15.427	8.5756e-05	0.00294891
chr4:53240588:53241127	52	11	21	123	59	68	-1.83725	3.10059	15.4239	8.58958e-05	0.00295184
chr2:59238829:59240604	194	78	68	280	192	357	-1.44945	4.85155	15.4195	8.60965e-05	0.00295686
chr11:77032557:77032959	12	6	5	33	20	27	-1.92801	1.51533	15.4177	8.61786e-05	0.00295779
chr14:121574532:121574949	46	21	26	86	52	96	-1.44812	3.05506	15.4021	8.68925e-05	0.0029804
chr11:43376413:43376874	9	11	13	32	41	48	-1.96686	2.11025	15.3998	8.69962e-05	0.00298206
chr15:28035626:28036170	21	11	14	38	33	64	-1.64439	2.24518	15.3941	8.72606e-05	0.00298923
chr5:104257815:104258832	65	46	36	156	68	186	-1.48041	3.77988	15.391	8.74036e-05	0.00299223
chr9:51833324:51833822	71	28	30	15	7	12	1.76838	2.03225	15.3844	8.77072e-05	0.00300072
chr13:52155535:52155983	19	3	5	37	20	34	-1.94669	1.64917	15.3785	8.79832e-05	0.00300763
chr16:49800332:49800640	12	0	1	28	6	34	-2.49626	1.08785	15.3777	8.80206e-05	0.00300763
chr19:21764984:21765340	16	3	7	17	19	80	-2.20297	1.81966	15.3718	8.82986e-05	0.00301522
chr2:58595731:58596353	44	11	14	77	40	76	-1.67204	2.72062	15.3675	8.84979e-05	0.00302012
chr6:34680974:34681840	26	21	15	88	40	65	-1.69579	2.7387	15.3519	8.92329e-05	0.00304327
chr16:30795388:30796312	128	72	95	263	162	260	-1.32474	4.63308	15.3478	8.94234e-05	0.00304785
chr4:147092515:147092801	15	4	1	26	31	24	-2.33953	1.53517	15.3187	9.08125e-05	0.00309324
chr12:86688992:86689913	107	32	66	207	97	196	-1.43598	4.11101	15.3111	9.11772e-05	0.00310175
chr3:97850124:97850701	28	4	15	45	37	57	-1.78593	2.27651	15.3116	9.11571e-05	0.00310175
chr2:166224413:166225280	51	21	12	46	74	234	-2.14754	3.40013	15.3087	9.12956e-05	0.00310382
chr11:110742345:110743079	25	12	17	50	26	85	-1.60072	2.42498	15.3074	9.13593e-05	0.00310403
chr3:115349734:115350697	115	51	77	206	112	235	-1.28625	4.29496	15.2902	9.21935e-05	0.0031304
chr15:27738346:27739301	46	21	13	88	71	76	-1.78121	3.06378	15.2847	9.24625e-05	0.0031365
chr9:60870058:60870467	30	16	5	44	34	143	-2.10327	2.71321	15.2842	9.24891e-05	0.0031365
chr9:57566119:57566787	114	44	82	17	14	44	1.60759	2.92658	15.2799	9.26965e-05	0.00314156
chr12:37777246:37777511	17	1	7	27	13	62	-2.10591	1.66201	15.2773	9.28241e-05	0.00314391
chr4:55684935:55685694	46	17	16	89	38	93	-1.59006	2.89081	15.2729	9.30442e-05	0.00314741
chr5:113579969:113580935	73	28	45	160	65	143	-1.43991	3.66288	15.2737	9.30025e-05	0.00314741
chr2:75402880:75403277	18	6	3	28	13	85	-2.21006	1.89297	15.2701	9.31801e-05	0.00315004
chr2:169123423:169123680	5	4	2	5	21	42	-2.67242	1.16224	15.2638	9.34915e-05	0.00315858
chr1:173124488:173124816	20	2	6	27	16	66	-2.06308	1.76861	15.2595	9.37023e-05	0.00316373
chr5:125554855:125555624	46	32	13	75	61	215	-1.91323	3.41946	15.2552	9.39158e-05	0.00316895
chr12:118642749:118643166	27	4	7	47	31	42	-1.91962	2.05614	15.2533	9.40122e-05	0.00317022
chr17:7899913:7900439	28	2	13	39	24	106	-2.07788	2.34348	15.2498	9.41875e-05	0.00317415
chr19:6191970:6192266	14	2	7	24	15	43	-1.93113	1.46295	15.2448	9.44373e-05	0.00317974
chr8:28071682:28072468	24	15	11	77	35	47	-1.78239	2.46888	15.2441	9.44711e-05	0.00317974
chr5:45675908:45676308	16	8	8	46	14	50	-1.80392	1.86479	15.2386	9.47494e-05	0.00318712
chr15:39955940:39956341	19	8	2	34	16	70	-2.07416	1.8964	15.2288	9.52409e-05	0.00320166
chr15:58807085:58807512	41	5	9	50	35	102	-1.9652	2.55756	15.2258	9.53914e-05	0.00320472
chr13:5768527:5769393	75	47	31	170	121	138	-1.64809	3.93539	15.2218	9.5593e-05	0.00320793
chr13:96031272:96031740	30	2	0	48	29	107	-2.77895	2.37848	15.2216	9.56058e-05	0.00320793
chr2:152005747:152006648	96	62	39	180	131	220	-1.52996	4.21368	15.2183	9.57697e-05	0.00321144
chr16:45922626:45923134	36	9	9	41	39	89	-1.81975	2.48635	15.2058	9.64047e-05	0.00322872
chr6:32400130:32400540	20	9	4	32	18	82	-2.00311	2.0287	15.2062	9.63868e-05	0.00322872
chr9:79873865:79874129	12	2	7	19	16	43	-1.98287	1.39604	15.202	9.66018e-05	0.00323332
chr7:144906011:144906263	8	0	6	23	7	33	-2.2045	1.04688	15.1936	9.70332e-05	0.00324574
chr12:16157934:16158483	18	5	13	35	23	52	-1.7126	1.9259	15.1918	9.71256e-05	0.00324682
chr3:95804976:95805738	20	7	8	59	24	33	-1.88966	2.00511	15.1899	9.72214e-05	0.00324801
chr14:103432287:103432886	27	16	10	51	28	89	-1.68265	2.4682	15.1835	9.75535e-05	0.00325508
chr1:91627143:91627735	47	19	20	65	54	107	-1.52859	2.98028	15.1841	9.75216e-05	0.00325508
chr10:21656224:21656540	19	2	4	28	20	39	-2.00175	1.56651	15.1779	9.78403e-05	0.00326062
chr18:13823737:13824024	14	0	3	41	7	35	-2.4186	1.36508	15.1787	9.77989e-05	0.00326062
chr18:11987024:11987329	20	1	1	34	26	31	-2.4019	1.61594	15.1737	9.80618e-05	0.00326397
chr3:121072318:121072950	73	27	44	134	73	136	-1.39034	3.60388	15.1747	9.80098e-05	0.00326397
chr14:26220967:26221879	82	24	39	155	75	132	-1.50039	3.6546	15.1704	9.82338e-05	0.00326768
chr10:5445792:5446173	20	5	6	37	35	30	-2.00416	1.88437	15.1661	9.84526e-05	0.00327093
chr9:114106633:114106967	11	6	4	41	42	13	-2.51586	1.80928	15.1671	9.84033e-05	0.00327093
chr1:135977477:135978004	30	9	12	56	32	55	-1.65263	2.32575	15.1535	9.91165e-05	0.00329096
chr3:102190883:102191128	9	4	4	25	8	37	-2.04084	1.21242	15.1418	9.97282e-05	0.00330923
chr4:148324739:148325471	31	17	16	55	32	102	-1.58281	2.65166	15.1377	9.99478e-05	0.00331449
chr11:59958999:59959347	12	10	2	23	29	44	-2.09902	1.73279	15.128	0.000100464	0.00332679
chr1:191993815:191995061	142	81	88	275	140	310	-1.28075	4.67458	15.1272	0.000100504	0.00332679
chr2:152002877:152003380	52	37	45	156	68	136	-1.46231	3.64249	15.1294	0.000100385	0.00332679
chr6:101315210:101315507	6	0	6	50	36	4	-3.28967	1.62701	15.1216	0.000100802	0.00333461
chr16:80512949:80513367	29	11	7	84	42	37	-2.03183	2.49207	15.1125	0.000101292	0.00334672
chr7:78728518:78728809	8	4	4	24	20	18	-2.12215	1.19189	15.1134	0.000101244	0.00334672
chr10:69388036:69388299	8	3	11	17	18	60	-2.10552	1.60894	15.1108	0.00010138	0.00334758
chr12:37740716:37741538	165	69	66	247	140	330	-1.36745	4.62506	15.1053	0.000101677	0.00335534
chr10:17513539:17514163	54	22	11	86	57	117	-1.72737	3.12079	15.0992	0.000102009	0.00336424
chr15:97329605:97330076	17	8	12	35	35	42	-1.76458	2.02842	15.0886	0.00010258	0.003381
chr13:41572015:41572470	14	2	1	31	18	20	-2.27532	1.26834	15.0833	0.000102867	0.0033884
chr16:84625800:84626265	19	7	15	50	38	37	-1.80983	2.18212	15.0792	0.000103094	0.0033938
chr9:5928258:5928842	38	34	31	14	1	12	1.98343	1.79178	15.0762	0.000103254	0.00339701
chr5:151026090:151026439	13	2	9	21	17	50	-1.95358	1.54812	15.0719	0.00010349	0.0034027
chr14:75302802:75303400	19	29	13	98	57	77	-1.92065	2.97774	15.0691	0.000103645	0.00340571
chr15:63025429:63026094	28	17	6	98	35	55	-1.98346	2.63529	15.0619	0.000104043	0.00341565
chr2:137119992:137120556	35	6	19	54	36	80	-1.66582	2.5285	15.0613	0.000104074	0.00341565
chr1:24118529:24119089	22	10	8	50	30	41	-1.75238	2.10504	15.059	0.000104202	0.00341777
chr11:68010567:68011233	49	10	24	83	56	81	-1.64103	2.95215	15.0572	0.0001043	0.00341891
chr1:128340030:128340297	14	5	4	46	23	19	-2.14868	1.63255	15.0375	0.000105398	0.0034528
chr8:121237031:121237399	13	10	7	60	12	48	-1.96782	1.94591	15.0335	0.000105618	0.00345792
chr12:76550693:76551022	21	10	14	44	22	70	-1.62578	2.19425	15.0251	0.000106092	0.00347133
chr10:68258218:68258560	12	4	14	43	21	36	-1.83708	1.80183	15.0198	0.000106388	0.00347892
chr19:53511628:53512253	30	5	0	37	34	132	-2.71435	2.5102	15.0158	0.000106612	0.00348412
chr4:32334419:32334922	46	19	16	97	50	76	-1.62606	2.96283	15.0147	0.000106679	0.0034842
chr18:55625717:55626196	25	16	11	48	42	62	-1.66952	2.44179	15.0027	0.000107358	0.00350425
chr12:46438387:46438537	6	0	2	26	21	4	-3.04423	0.891559	14.9837	0.000108443	0.00353754
chr11:72248283:72248656	16	12	3	50	23	41	-1.94682	1.95509	14.9791	0.000108707	0.003544
chrX:73370848:73371800	158	39	53	18	18	26	1.74493	2.87109	14.9776	0.000108793	0.00354466
chr19:46687575:46688096	47	21	20	95	38	108	-1.51954	3.0177	14.9715	0.000109145	0.00355398
chr17:12803993:12804336	18	7	1	25	22	57	-2.10743	1.75769	14.9668	0.000109421	0.00356084
chr5:36113789:36114206	19	2	11	26	20	74	-1.99022	1.92072	14.9579	0.000109938	0.00357334
chr6:37685523:37686415	65	29	51	111	99	143	-1.4451	3.68311	14.9583	0.000109912	0.00357334
chr7:26171105:26171782	90	33	44	196	84	142	-1.49495	3.87574	14.9565	0.000110017	0.00357377
chr10:85570021:85570621	36	14	24	72	51	69	-1.5464	2.79755	14.9494	0.000110435	0.00358519
chr7:105563965:105564556	29	20	6	82	56	57	-1.98912	2.75747	14.9476	0.000110539	0.0035864
chr19:20467670:20468656	139	51	85	194	148	274	-1.31806	4.46593	14.9396	0.000111007	0.00359941
chr9:102819976:102820417	27	6	5	40	20	72	-1.9081	2.07187	14.926	0.000111814	0.00362341
chr9:94517809:94518214	21	9	7	32	27	55	-1.73826	1.98506	14.9137	0.000112544	0.0036449
chr8:66797554:66798224	30	6	7	61	22	56	-1.85607	2.19258	14.9002	0.000113351	0.00366883
chr7:91504567:91504944	16	3	12	35	26	36	-1.82405	1.79041	14.8884	0.000114063	0.00368966
chr9:116247234:116247741	24	0	4	41	13	107	-2.65056	2.13589	14.8856	0.000114229	0.00369282
chr12:56422475:56423539	73	16	43	122	63	157	-1.51916	3.52282	14.8804	0.000114547	0.00370087
chr4:101348191:101348884	43	12	28	102	68	63	-1.74535	3.06434	14.8784	0.00011467	0.00370264
chr15:101980808:101981562	46	17	19	131	45	70	-1.74263	3.05709	14.866	0.000115425	0.00372478
chr17:34998957:34999896	50	31	9	127	77	106	-1.92273	3.38075	14.8638	0.000115557	0.00372682
chr2:117374070:117374351	15	2	4	36	11	32	-2.03702	1.39713	14.8616	0.000115695	0.00372903
chr13:61037698:61038517	134	62	57	261	159	205	-1.48919	4.48679	14.8579	0.000115919	0.00373402
chr13:24005650:24006163	14	16	7	73	26	44	-1.95434	2.26281	14.8471	0.00011659	0.00375117
chr16:42784757:42785221	16	7	15	34	25	57	-1.67755	2.00826	14.848	0.000116534	0.00375117
chr8:12905569:12906092	15	3	5	19	26	35	-2.01876	1.51008	14.8449	0.000116723	0.00375322
chr5:139903998:139904324	16	0	7	14	27	64	-2.39634	1.73252	14.8433	0.000116823	0.00375418
chr8:81854841:81855427	25	14	15	54	35	59	-1.55812	2.40601	14.8372	0.000117202	0.00376413
chr10:21255162:21256073	73	36	43	113	81	165	-1.33889	3.67679	14.8353	0.000117317	0.00376467
chr3:89676151:89676541	10	8	12	58	21	31	-1.92934	1.92276	14.8347	0.000117358	0.00376467
chr14:75247341:75247650	15	1	3	28	16	26	-2.09429	1.2811	14.8291	0.000117704	0.00377353
chr4:91042987:91043462	62	34	45	137	71	134	-1.36291	3.60682	14.8269	0.000117844	0.00377353
chr5:110901070:110901373	18	0	1	38	10	49	-2.53604	1.53974	14.8279	0.000117777	0.00377353
chr10:53746402:53746906	31	11	22	74	32	69	-1.55313	2.59883	14.8257	0.000117917	0.00377361
chr2:32520492:32521307	98	32	45	172	83	164	-1.41621	3.86906	14.823	0.000118084	0.00377672
chr12:109688014:109688693	33	30	20	116	41	107	-1.64283	3.12874	14.8199	0.000118284	0.00378088
chr14:41728068:41728414	21	3	0	64	21	31	-2.55703	1.87899	14.8161	0.000118518	0.00378611
chr1:170095186:170095675	19	10	7	78	24	32	-2.01496	2.17285	14.8095	0.000118932	0.00379487
chr19:10088224:10088764	45	25	8	87	61	105	-1.8276	3.08867	14.8104	0.000118878	0.00379487
chr12:96727616:96727887	14	0	3	24	9	41	-2.23469	1.23615	14.8081	0.000119023	0.00379553
chr6:136907352:136908046	114	71	61	24	18	41	1.51269	3.03926	14.8061	0.000119147	0.00379723
chr5:32184643:32185093	7	7	7	46	8	39	-2.07528	1.58172	14.7848	0.000120505	0.00383597
chr8:97548315:97548715	27	9	12	55	16	102	-1.84067	2.39872	14.7855	0.000120458	0.00383597
chr19:40711370:40712387	88	36	34	156	82	151	-1.44588	3.76843	14.7806	0.000120769	0.00384213
chr5:143642680:143643256	47	4	6	50	41	156	-2.3337	2.83686	14.7717	0.000121341	0.00385803
chr18:45215626:45215794	7	5	0	86	60	2	-3.93604	2.28044	14.7609	0.000122037	0.00387688
chr4:95450857:95451415	24	8	1	49	25	50	-2.08095	2.026	14.7603	0.000122077	0.00387688
chr19:42702494:42703023	104	37	66	17	15	33	1.54145	2.72727	14.7561	0.00012235	0.00388327
chr8:97539810:97540153	14	8	8	38	13	53	-1.787	1.78123	14.7517	0.000122636	0.00389005
chr1:131784448:131784702	8	8	7	43	11	37	-1.94929	1.60076	14.7494	0.000122788	0.00389259
chrX:10079769:10080072	14	3	4	30	13	31	-1.9362	1.34904	14.7417	0.000123286	0.00390608
chr13:81471105:81471359	9	3	0	26	16	13	-2.41062	0.985653	14.7378	0.000123541	0.0039117
chr15:13854520:13854857	15	2	4	27	43	17	-2.51699	1.68624	14.7368	0.000123608	0.0039117
chr19:24827401:24828786	135	70	74	282	142	236	-1.3593	4.55788	14.714	0.000125116	0.00395709
chr6:115471816:115472204	21	8	2	36	30	41	-1.99319	1.89669	14.7039	0.000125783	0.00397585
chr14:69337532:69338231	38	13	4	77	69	53	-2.1949	2.79276	14.7002	0.000126035	0.00397915
chr18:54773274:54773690	4	4	10	26	16	29	-2.00822	1.32332	14.7008	0.000125994	0.00397915
chr6:94698293:94698814	18	5	12	46	20	41	-1.72548	1.89403	14.6944	0.000126424	0.00398913
chr11:70579362:70579986	69	14	33	106	64	124	-1.54313	3.34098	14.6768	0.00012761	0.00402417
chr3:21742062:21742397	6	1	0	36	0	35	-3.28444	1.02504	14.6714	0.000127976	0.00403103
chr9:77277421:77277819	46	10	8	107	34	74	-1.9546	2.78756	14.6721	0.000127929	0.00403103
chr3:57305499:57306056	33	5	23	67	46	62	-1.75158	2.61678	14.6661	0.000128331	0.00403899
chr9:106374210:106374477	6	1	9	26	15	22	-2.08496	1.16645	14.6654	0.000128379	0.00403899
chr9:70825022:70825664	78	28	21	105	73	164	-1.57882	3.52789	14.6637	0.000128497	0.00404035
chr9:45802245:45802543	10	6	5	39	19	20	-2.02267	1.48041	14.661	0.000128683	0.00404384
chr4:57854777:57856262	84	27	45	165	72	144	-1.43433	3.72589	14.6555	0.000129056	0.00405322
chr9:118571648:118572041	8	8	0	28	25	21	-2.35376	1.40144	14.6504	0.000129407	0.00406187
chr10:120319244:120320162	93	40	69	172	85	218	-1.30193	4.04386	14.645	0.00012978	0.00407122
chr12:101767321:101767869	32	16	19	68	40	67	-1.50046	2.64942	14.6385	0.00013023	0.00408295
chr6:92854043:92854385	12	6	0	27	22	24	-2.20895	1.37281	14.6372	0.000130319	0.00408337
chr4:45178373:45178615	18	2	3	76	20	17	-2.58621	1.86547	14.6334	0.000130576	0.00408907
chr12:37742150:37742755	39	18	26	104	61	63	-1.64239	3.04012	14.6323	0.000130654	0.00408913
chr14:124439737:124440550	196	235	311	81	34	137	1.70532	4.65877	14.6262	0.000131082	0.00410016
chr11:88048278:88049853	550	690	892	252	140	355	1.6045	6.20515	14.6227	0.000131321	0.00410288
chr9:13231284:13231768	15	2	9	27	20	37	-1.84421	1.55994	14.6233	0.00013128	0.00410288
chr10:110515999:110516486	31	6	9	67	45	35	-2.00566	2.38005	14.6141	0.000131923	0.00411065
chr1:121341883:121342397	38	9	10	81	49	45	-1.91824	2.61899	14.6162	0.000131775	0.00411065
chr12:76421325:76421981	20	5	12	52	22	39	-1.75266	1.97454	14.6126	0.000132032	0.00411065
chr14:118597657:118598450	31	4	0	55	131	39	-3.39165	2.99026	14.6127	0.000132025	0.00411065
chr19:40565240:40565728	23	2	9	53	24	35	-1.95712	1.93719	14.6123	0.000132048	0.00411065
chr5:135500458:135500706	14	5	0	27	24	25	-2.23971	1.42575	14.6115	0.000132103	0.00411065
chr6:39489480:39490141	49	15	30	70	52	116	-1.46825	3.04724	14.6156	0.000131817	0.00411065
chr13:54344358:54344725	19	10	8	28	20	99	-1.94587	2.1703	14.5956	0.000133226	0.00414319
chr5:124150644:124151020	10	3	8	24	23	25	-1.95426	1.4024	14.5937	0.000133362	0.00414504
chr1:186115037:186115375	18	9	5	19	34	68	-2.03523	2.0159	14.5918	0.000133493	0.00414674
chr5:59321033:59321226	5	2	0	24	24	3	-3.21895	0.906087	14.5906	0.000133578	0.00414699
chr9:57894775:57895124	13	3	6	31	16	27	-1.89026	1.39143	14.5886	0.00013372	0.00414901
chr14:8665816:8666270	17	2	4	21	16	48	-2.0186	1.48522	14.5844	0.000134017	0.00415584
chr12:85667987:85668479	25	10	3	56	18	68	-1.96283	2.16338	14.5796	0.000134364	0.00416421
chr6:134918420:134918878	22	6	7	39	13	80	-1.93084	2.01808	14.5707	0.000134994	0.00418133
chr12:114152769:114153068	4	6	6	16	15	37	-2.06081	1.23123	14.5649	0.000135411	0.00419183
chr12:15977011:15977438	21	5	7	27	25	51	-1.79917	1.8317	14.5582	0.000135893	0.00420434
chr10:84506717:84507804	60	17	23	72	60	126	-1.53916	3.15238	14.5543	0.000136179	0.00420858
chr2:115762338:115762901	37	2	1	65	26	141	-2.75992	2.65538	14.5542	0.000136185	0.00420858
chr1:38414851:38415930	95	61	75	32	13	38	1.45969	2.9738	14.5515	0.000136381	0.00420979
chr16:58453902:58454284	16	10	8	42	21	42	-1.69599	1.88551	14.5517	0.000136362	0.00420979
chr5:67334756:67335137	17	9	8	34	22	47	-1.67772	1.85683	14.5491	0.000136554	0.00421272
chr2:158128594:158128900	17	8	0	38	18	46	-2.11891	1.7335	14.5422	0.000137055	0.00422034
chr4:60283747:60283914	4	3	2	26	15	7	-2.56943	0.824903	14.5414	0.000137113	0.00422034
chr5:95760213:95760423	9	4	1	41	30	7	-2.80165	1.46896	14.5432	0.000136979	0.00422034
chr9:96406328:96407110	120	74	98	34	16	58	1.44495	3.29986	14.5431	0.000136986	0.00422034
chr5:121156347:121156916	37	9	5	36	35	146	-2.18886	2.6686	14.5403	0.000137192	0.00422034
chr10:66090568:66091116	20	2	13	43	20	48	-1.80322	1.90707	14.5382	0.00013735	0.00422118
chr12:102110626:102111003	18	12	4	67	46	25	-2.25053	2.28438	14.5367	0.000137453	0.00422118
chr7:134394650:134394899	10	2	2	28	17	13	-2.28722	1.07281	14.5377	0.000137386	0.00422118
chr4:120647553:120647784	12	4	5	24	22	25	-1.94095	1.37956	14.5305	0.000137911	0.00423281
chr11:109276622:109276935	19	2	3	20	19	54	-2.12256	1.58974	14.5221	0.000138526	0.00424643
chr11:86815544:86816238	55	13	23	84	40	122	-1.557	3.02353	14.5212	0.00013859	0.00424643
chr8:113197118:113197389	10	4	1	26	6	37	-2.19801	1.15045	14.5217	0.000138556	0.00424643
chr10:92707186:92707595	13	2	8	29	20	27	-1.90234	1.44929	14.5144	0.00013909	0.00425336
chr10:99250329:99250651	15	5	0	52	25	18	-2.51748	1.68467	14.5139	0.000139131	0.00425336
chr11:69927785:69928486	83	28	19	161	144	96	-1.98767	3.8452	14.5145	0.000139085	0.00425336
chr17:73602600:73603306	40	9	12	67	48	56	-1.76248	2.60125	14.5145	0.000139086	0.00425336
chr1:182332483:182333113	67	27	35	105	52	182	-1.43621	3.48568	14.5106	0.00013937	0.00425824
chr6:126084077:126084393	18	5	0	43	23	28	-2.27568	1.6705	14.4981	0.000140297	0.00428415
chr3:84652590:84653094	39	13	13	59	45	69	-1.60697	2.62186	14.493	0.000140679	0.00429338
chr4:138532034:138532314	13	6	6	36	8	57	-1.97234	1.66278	14.49	0.000140904	0.0042978
chr4:124808602:124809219	59	15	20	134	45	91	-1.7026	3.16764	14.4804	0.000141626	0.00431739
chr5:100997146:100997449	16	3	1	62	26	13	-2.67364	1.75511	14.4741	0.000142103	0.0043295
chr15:38835740:38836317	45	22	14	100	42	89	-1.61162	2.97269	14.4693	0.00014246	0.00433791
chr1:34130671:34131022	19	5	8	23	34	45	-1.89573	1.86685	14.4602	0.000143152	0.00435653
chrX:163368784:163369562	81	24	34	105	77	151	-1.43826	3.54691	14.4539	0.000143635	0.00436876
chr9:83467233:83467549	14	13	0	42	34	47	-2.27413	2.04053	14.4521	0.000143771	0.00437043
chr19:53574700:53575531	137	49	57	215	117	226	-1.35842	4.29853	14.4378	0.000144864	0.00440119
chr5:15010758:15011059	22	4	3	27	29	42	-2.0181	1.76749	14.4363	0.00014498	0.00440224
chr9:102661820:102662364	48	25	27	112	49	96	-1.45053	3.17273	14.433	0.000145237	0.00440755
chr10:12542714:12543550	31	10	15	38	41	78	-1.64155	2.45498	14.4293	0.000145523	0.00441129
chr12:36706117:36706604	28	12	8	62	27	54	-1.69405	2.29779	14.4299	0.000145474	0.00441129
chr2:92966601:92967177	64	39	14	141	79	149	-1.74946	3.61954	14.428	0.000145618	0.00441168
chr12:80354216:80354614	21	11	0	33	35	81	-2.32122	2.22403	14.4235	0.000145969	0.00441983
chr1:159373533:159373925	11	3	10	33	16	31	-1.8345	1.49411	14.4172	0.000146459	0.00443219
chr10:23884170:23884846	70	15	32	126	59	115	-1.553	3.36133	14.4096	0.00014705	0.00444758
chr4:129172296:129174498	170	72	113	285	145	352	-1.22363	4.78451	14.4017	0.000147668	0.00446379
chr1:132980295:132981460	53	36	35	132	63	123	-1.41215	3.4859	14.3951	0.000148191	0.00447706
chr8:111378964:111379492	44	10	25	80	49	75	-1.57237	2.85294	14.388	0.000148749	0.00449142
chr15:93344362:93344656	15	4	0	32	10	41	-2.2124	1.40375	14.385	0.000148987	0.00449383
chr7:105682944:105683407	31	3	3	90	34	33	-2.45176	2.34312	14.3849	0.000148995	0.00449383
chr19:10097502:10098049	37	8	11	57	33	66	-1.66821	2.42184	14.3831	0.000149138	0.00449562
chr11:109454657:109455345	49	29	35	105	60	111	-1.36939	3.30838	14.3814	0.000149272	0.00449562
chr19:47961079:47961624	59	18	23	92	39	151	-1.56602	3.18154	14.381	0.000149304	0.00449562
chr9:102814875:102815398	26	5	6	52	31	34	-1.93398	2.03893	14.3797	0.000149401	0.00449603
chr17:64965614:64965885	8	7	5	26	12	36	-1.88278	1.35189	14.3768	0.000149633	0.00450048
chr3:18687537:18687924	19	11	4	50	15	60	-1.88252	2.00719	14.3753	0.000149751	0.00450154
chr16:30873567:30873863	12	4	4	23	19	26	-1.92459	1.30433	14.3699	0.000150185	0.00451206
chr1:121113941:121114254	10	7	4	23	30	24	-2.07494	1.5186	14.3593	0.000151032	0.00453358
chr6:140484012:140484544	18	10	8	47	16	53	-1.71183	1.96179	14.3588	0.000151069	0.00453358
chr4:91038570:91038875	12	4	2	31	28	14	-2.33099	1.42118	14.3572	0.000151204	0.00453512
chr13:94840763:94841299	29	18	6	79	33	65	-1.81829	2.56678	14.3546	0.00015141	0.00453626
chr16:78619581:78619915	15	2	5	32	33	17	-2.27152	1.59132	14.3553	0.00015135	0.00453626
chr10:74859656:74860103	41	25	14	65	51	116	-1.60101	2.98038	14.35	0.000151778	0.00454224
chr17:74135896:74136453	28	4	14	54	53	37	-2.0075	2.38648	14.3503	0.000151757	0.00454224
chr6:36854837:36855454	40	15	20	46	49	117	-1.60737	2.84453	14.3413	0.00015248	0.00456071
chr13:83712533:83712837	19	6	9	38	27	35	-1.73733	1.85714	14.3363	0.000152892	0.00456798
chr6:114815923:114817066	84	33	35	118	79	162	-1.37702	3.66264	14.3366	0.000152862	0.00456798
chr17:44398544:44399092	60	73	67	18	10	36	1.75156	2.79429	14.3243	0.000153863	0.00459444
chr10:69719587:69720193	31	15	20	60	45	65	-1.50717	2.63246	14.314	0.00015471	0.00461688
chr12:81954635:81955089	28	9	3	86	19	56	-2.13278	2.32886	14.3124	0.000154842	0.00461688
chrX:163491223:163491375	6	1	2	35	20	3	-3.00358	1.04136	14.312	0.000154871	0.00461688
chr1:128580255:128581079	30	21	14	45	48	107	-1.66903	2.76425	14.3107	0.000154985	0.00461774
chr10:5446618:5447099	28	9	9	73	18	60	-1.80096	2.29411	14.3058	0.000155384	0.00462707
chr8:125048451:125048750	17	5	8	45	19	31	-1.80648	1.73883	14.2879	0.000156868	0.00466867
chr8:3756136:3756429	8	5	4	28	33	12	-2.39154	1.45544	14.2647	0.000158819	0.00472415
chr12:54869291:54869922	56	2	18	106	51	110	-2.10953	3.06545	14.2551	0.000159631	0.00474232
chr3:10205649:10206198	28	2	11	53	30	44	-1.89385	2.12576	14.255	0.00015964	0.00474232
chr7:30987821:30989403	218	88	185	44	39	88	1.4213	3.99027	14.2543	0.000159694	0.00474232
chr11:100224520:100224813	40	31	21	8	5	12	1.842	1.65303	14.2529	0.000159816	0.00474334
chr12:109916606:109917153	26	3	19	92	30	45	-1.99604	2.46636	14.2511	0.00015997	0.0047453
chr13:33031054:33031438	52	27	25	10	8	10	1.75007	1.78981	14.2471	0.000160304	0.00475261
chr15:97417783:97417943	0	4	2	54	38	1	-4.00512	1.63545	14.2438	0.000160586	0.00475836
chr7:108143895:108144410	12	10	10	40	17	47	-1.70096	1.84068	14.2427	0.000160681	0.00475855
chr17:64966149:64966357	9	3	2	28	18	12	-2.27373	1.08911	14.2363	0.000161234	0.00477232
chr12:8449830:8450605	77	23	54	131	62	208	-1.44761	3.72405	14.2238	0.000162306	0.00480066
chr18:62271828:62272174	13	2	7	30	17	26	-1.89247	1.38234	14.223	0.000162369	0.00480066
chr8:72887950:72888324	27	6	8	44	21	58	-1.71625	2.04829	14.2209	0.000162553	0.00480346
chr8:23370389:23371238	112	61	51	205	94	262	-1.36373	4.25103	14.2144	0.000163117	0.00481749
chr13:37638461:37638956	24	7	12	32	40	52	-1.74618	2.16494	14.2077	0.000163696	0.00483193
chr3:120318521:120318814	18	3	3	38	23	23	-2.08118	1.57168	14.1937	0.000164921	0.00486545
chr7:139424548:139424889	14	6	3	27	22	28	-1.91289	1.47901	14.1914	0.000165127	0.00486885
chr15:73682483:73682799	9	7	10	22	30	37	-1.89641	1.698	14.1893	0.000165311	0.00487161
chr6:137463436:137463628	5	6	3	28	32	10	-2.5548	1.38481	14.1848	0.000165701	0.00488044
chr2:52338996:52339323	15	2	0	25	13	31	-2.20169	1.21045	14.1829	0.000165871	0.0048828
chr2:156082729:156083264	27	9	13	67	26	48	-1.65941	2.29153	14.1769	0.0001664	0.00489569
chr6:140096177:140096503	15	8	2	48	23	24	-2.09248	1.72878	14.1756	0.00016652	0.00489655
chr11:113191168:113191877	33	10	8	70	49	39	-1.93082	2.49766	14.172	0.000166832	0.00490306
chr13:28516456:28516809	18	3	7	25	12	82	-2.09643	1.83014	14.1703	0.000166989	0.00490501
chr18:80829976:80830822	174	87	144	319	165	437	-1.22698	5.00462	14.1636	0.000167583	0.00491856
chr6:115719863:115720223	14	5	6	30	18	31	-1.7849	1.50074	14.163	0.000167633	0.00491856
chr10:117493772:117494246	24	6	5	31	25	53	-1.80575	1.90044	14.1584	0.000168041	0.00492786
chr1:82968626:82969037	25	16	24	54	37	87	-1.48902	2.63573	14.1547	0.000168374	0.00493494
chr10:20191889:20192209	18	6	2	29	14	55	-1.9758	1.65812	14.1476	0.000169013	0.00494864
chr18:69102085:69102402	14	4	7	46	6	55	-2.0786	1.71323	14.1475	0.000169024	0.00494864
chr2:132549642:132549900	7	3	4	39	17	9	-2.39872	1.21196	14.1437	0.000169368	0.00495331
chr7:127043148:127043618	30	19	11	68	60	53	-1.79512	2.72346	14.1442	0.000169315	0.00495331
chr10:92545927:92546356	29	8	6	49	38	42	-1.85033	2.20168	14.1421	0.000169507	0.00495472
chr2:170034498:170035314	166	48	55	216	110	397	-1.52849	4.52615	14.1288	0.00017071	0.00498717
chr9:103466141:103466516	23	6	11	32	18	95	-1.8704	2.15985	14.1276	0.000170815	0.00498753
chr11:81220695:81221080	7	7	4	34	28	14	-2.26127	1.48733	14.1239	0.000171156	0.00498847
chr14:106792520:106793718	180	98	132	62	26	73	1.31235	3.79535	14.1232	0.000171217	0.00498847
chr15:77749821:77750416	32	14	12	99	29	55	-1.76966	2.61864	14.1251	0.000171048	0.00498847
chr16:83079803:83079997	7	5	0	23	33	10	-2.78534	1.29133	14.1235	0.000171189	0.00498847
chr12:56486858:56487339	12	10	9	69	22	27	-1.9934	2.01453	14.1218	0.00017135	0.00498966
chr15:44579649:44580368	56	22	19	114	55	87	-1.56813	3.1634	14.1203	0.000171486	0.00499093
chr11:53817705:53818085	30	10	5	40	28	77	-1.80693	2.25366	14.1168	0.000171802	0.00499475
chr7:151603298:151604061	64	36	25	122	75	123	-1.4762	3.50624	14.1178	0.000171713	0.00499475
chr8:125521904:125522243	8	6	7	32	11	33	-1.85885	1.3914	14.1141	0.000172054	0.00499938
chr4:82077657:82078206	32	13	20	61	32	75	-1.4572	2.5591	14.1114	0.000172296	0.00500371
chr5:36128478:36128890	32	2	15	44	28	94	-1.91288	2.38614	14.1065	0.000172743	0.00501401
chr9:42269685:42270100	16	10	2	47	22	33	-1.97697	1.81515	14.1027	0.000173097	0.00502158
chr2:28380607:28382279	152	76	70	203	145	373	-1.34158	4.62891	14.1003	0.000173317	0.00502526
chr6:31595185:31595775	32	8	7	45	32	59	-1.73119	2.23351	14.0982	0.000173507	0.00502808
chr16:38174520:38175143	96	27	50	9	4	33	1.87108	2.36943	14.0965	0.000173669	0.00503007
chr6:17941602:17941912	21	4	0	24	26	55	-2.30287	1.76248	14.0953	0.00017378	0.00503057
chr8:74805474:74805865	15	6	5	22	18	47	-1.81936	1.57696	14.0932	0.000173968	0.00503334
chr3:121800859:121801225	19	6	5	39	15	43	-1.78796	1.71645	14.0883	0.00017443	0.00504399
chr4:133171349:133171793	32	12	5	59	23	84	-1.83201	2.40128	14.0822	0.000174988	0.00505741
chr10:95330144:95330571	30	11	11	48	37	55	-1.60745	2.33346	14.0784	0.000175349	0.00506514
chr15:44506179:44506666	24	6	4	50	34	29	-2.03164	2.00425	14.0729	0.000175859	0.00507715
chr10:87527603:87527875	16	4	6	50	22	20	-2.04416	1.69669	14.0698	0.000176151	0.00508287
chr8:28216788:28218078	106	96	120	328	166	355	-1.38541	4.87631	14.0684	0.00017628	0.00508388
chr15:60941026:60941347	12	7	5	11	32	60	-2.20613	1.78251	14.0646	0.000176637	0.00509143
chr16:18717815:18718703	60	30	29	78	76	147	-1.45498	3.41009	14.0611	0.000176962	0.00509809
chr16:44973461:44973611	4	0	2	35	16	1	-3.40027	0.855826	14.0584	0.000177223	0.00510289
chr1:60835245:60835799	16	2	11	24	41	34	-2.09683	1.85722	14.0567	0.00017738	0.00510468
chr1:182995394:182996148	171	66	82	46	13	49	1.48841	3.33268	14.0546	0.000177582	0.00510779
chr19:47586254:47587153	58	19	24	139	36	118	-1.624	3.24732	14.0501	0.000178002	0.00511713
chr10:12501018:12501930	84	20	37	117	68	157	-1.4478	3.55325	14.049	0.000178104	0.00511735
chr18:69327794:69328205	14	5	4	26	17	32	-1.82789	1.41549	14.0449	0.000178496	0.00512315
chr6:16420121:16420565	36	2	22	66	45	75	-1.8848	2.64535	14.045	0.000178484	0.00512315
chr16:30944926:30945373	28	6	8	56	18	58	-1.77427	2.11663	14.0379	0.000179166	0.0051369
chr18:4796665:4797043	17	3	0	27	32	24	-2.44359	1.55533	14.038	0.000179155	0.0051369
chr13:16937189:16937640	16	9	3	58	25	24	-2.09617	1.89033	14.0308	0.000179843	0.00515085
chr8:90904463:90904707	8	5	2	29	4	42	-2.23713	1.22895	14.0311	0.000179814	0.00515085
chr5:147848188:147848689	16	4	3	32	17	28	-1.91415	1.44052	14.0267	0.000180238	0.00515943
chr17:43596918:43597246	9	5	7	24	19	27	-1.84452	1.35896	14.0248	0.000180418	0.00516185
chr1:64331299:64331670	31	7	2	52	29	58	-2.02049	2.19152	14.0137	0.000181479	0.00518947
chr14:28049160:28049500	26	3	4	46	23	40	-1.9757	1.88155	14.0049	0.000182334	0.0052085
chr5:139480622:139481132	18	6	7	19	18	100	-2.12044	2.02351	14.0049	0.000182338	0.0052085
chr2:104421320:104422042	158	80	94	46	23	58	1.31849	3.48076	14.0034	0.000182485	0.00520994
chr12:17513727:17514527	40	2	27	115	42	86	-2.0315	2.95141	14.001	0.000182709	0.00521359
chr1:155406862:155407200	12	8	1	27	23	28	-2.03721	1.48313	13.9985	0.000182961	0.00521801
chr2:52797347:52797672	13	5	2	29	12	31	-1.93466	1.31126	13.9969	0.000183114	0.00521961
chr14:79557332:79557846	12	2	8	27	13	34	-1.84011	1.36042	13.9938	0.000183411	0.00522533
chr13:111352724:111353517	86	61	44	200	132	167	-1.50406	4.16938	13.9858	0.000184194	0.00524485
chr19:6297396:6298045	73	23	20	88	83	130	-1.60791	3.40333	13.9779	0.000184968	0.00526414
chr3:101208554:101208877	39	20	15	5	4	9	1.92749	1.30136	13.9742	0.000185332	0.0052717
chr18:76514372:76514706	11	6	5	20	15	42	-1.84416	1.40922	13.9693	0.000185817	0.00528271
chr2:77014284:77014855	44	28	14	71	54	128	-1.60868	3.09305	13.963	0.000186441	0.00529766
chr10:95161822:95162406	22	18	8	98	34	44	-1.94329	2.5696	13.9562	0.000187124	0.00531428
chr3:10213709:10214097	20	12	11	47	42	38	-1.75283	2.23547	13.9501	0.000187728	0.00532863
chr4:128936359:128936710	17	5	7	29	24	34	-1.76028	1.65822	13.9487	0.000187872	0.00532991
chr2:168563472:168563706	10	0	4	10	16	33	-2.24048	1.02393	13.9428	0.000188462	0.00534106
chr3:37565685:37566054	19	10	7	28	17	110	-2.02594	2.19659	13.9431	0.000188425	0.00534106
chr12:108883417:108884254	108	36	69	177	115	183	-1.3369	4.10817	13.933	0.000189439	0.0053659
chr12:8266240:8266832	85	42	43	16	8	32	1.5638	2.47712	13.9289	0.000189853	0.00537481
chr15:64116597:64117159	74	24	19	103	62	143	-1.55402	3.38041	13.9257	0.000190182	0.00537794
chr5:129766514:129766997	22	8	3	48	21	40	-1.87212	1.89602	13.9249	0.000190262	0.00537794
chr9:13978509:13978804	10	6	5	16	16	47	-1.92925	1.41957	13.9266	0.000190086	0.00537794
chr12:109541987:109542431	13	4	7	38	9	39	-1.87528	1.51292	13.9227	0.000190482	0.00537878
chrX:165491948:165492531	33	6	10	64	32	46	-1.77461	2.30371	13.9226	0.000190491	0.00537878
chr4:132001946:132002338	20	10	4	49	23	38	-1.81987	1.93691	13.919	0.000190862	0.00538643
chr15:61439808:61440304	48	20	12	84	47	88	-1.60083	2.92012	13.9168	0.000191086	0.00538995
chr18:76615162:76615381	15	5	1	21	15	44	-2.02251	1.41396	13.9142	0.000191345	0.00539443
chr3:64121008:64121194	10	2	1	27	23	9	-2.53227	1.11865	13.9016	0.000192631	0.00542784
chr8:109323904:109324078	10	0	3	25	15	13	-2.28191	0.946385	13.8996	0.000192837	0.00543082
chr1:129629327:129629772	36	17	20	8	2	9	1.85828	1.29131	13.8983	0.000192977	0.00543192
chr3:153352758:153353340	63	31	34	94	85	125	-1.40674	3.47938	13.8929	0.00019353	0.00544467
chr9:20598203:20599431	365	221	263	116	68	174	1.21846	4.87432	13.891	0.000193728	0.0054474
chr15:62279783:62279970	20	53	47	5	10	8	2.37606	2.05882	13.8824	0.000194617	0.00546384
chr17:67372292:67372899	26	0	14	44	23	86	-2.08272	2.23164	13.8834	0.000194508	0.00546384
chr3:138385121:138385649	36	14	8	48	27	144	-1.91691	2.70769	13.8833	0.000194516	0.00546384
chr1:182331298:182331608	14	5	5	30	25	23	-1.91686	1.52752	13.8787	0.000194999	0.00546986
chr3:55204868:55205319	20	5	3	61	14	33	-2.09888	1.81587	13.8774	0.000195135	0.00546986
chr7:80862596:80863843	291	90	174	444	217	584	-1.27894	5.41676	13.8782	0.000195047	0.00546986
chrX:165544147:165544575	12	4	11	36	16	34	-1.75359	1.59737	13.8687	0.000196038	0.00549232
chr10:70724496:70724755	9	3	1	23	17	13	-2.24608	0.974306	13.8534	0.000197634	0.00553417
chr14:73289442:73289839	14	2	4	42	18	16	-2.17302	1.41865	13.8494	0.000198062	0.00554061
chr7:22983017:22983264	6	5	5	23	25	15	-2.16843	1.25464	13.8493	0.00019807	0.00554061
chr11:116384632:116385874	302	74	159	403	246	568	-1.36041	5.38756	13.8357	0.000199505	0.00557458
chr17:35161956:35162332	18	5	14	64	20	36	-1.81728	2.03716	13.8341	0.000199683	0.00557458
chr5:65875187:65875609	59	10	27	93	52	102	-1.57339	3.08521	13.8339	0.000199697	0.00557458
chr7:123384828:123385582	64	17	48	136	80	108	-1.53468	3.53007	13.8355	0.000199532	0.00557458
chr2:32880498:32880991	35	21	25	78	40	87	-1.39651	2.86273	13.8015	0.000203178	0.00566881
chr10:58067212:58068181	452	167	240	94	61	174	1.28991	4.78675	13.7961	0.000203757	0.00568203
chr7:78432380:78432686	18	6	6	46	12	43	-1.81661	1.74763	13.7873	0.000204716	0.00570584
chr1:135963532:135964159	34	24	13	77	48	75	-1.58819	2.82632	13.7697	0.000206646	0.00574777
chr12:53594052:53594796	149	66	94	33	28	50	1.34577	3.36016	13.7718	0.000206414	0.00574777
chr2:137243377:137243780	18	4	12	61	12	47	-1.88119	1.95796	13.7713	0.000206466	0.00574777
chr6:39214564:39215191	47	26	36	81	68	113	-1.37675	3.25714	13.7703	0.000206574	0.00574777
chr3:88325535:88326359	108	44	71	169	98	222	-1.23272	4.12486	13.7668	0.000206957	0.00575344
chr14:23834135:23834392	19	1	3	22	15	52	-2.11328	1.51172	13.7573	0.000208006	0.00577965
chrX:45357904:45358347	12	10	5	44	25	25	-1.91816	1.76167	13.7513	0.000208679	0.00579535
chr1:69153454:69153946	43	22	33	8	8	12	1.68972	1.73405	13.7466	0.000209195	0.0058067
chr1:72924472:72924681	8	6	5	18	17	32	-1.87814	1.27079	13.7429	0.000209615	0.00581402
chr4:140563898:140564413	32	32	22	83	80	90	-1.65914	3.20197	13.7414	0.000209782	0.00581402
chr4:58630034:58630534	105	42	43	22	12	27	1.50902	2.61314	13.7418	0.000209736	0.00581402
chr10:77260541:77260873	6	7	5	12	16	56	-2.1427	1.44119	13.7402	0.000209912	0.00581463
chr4:6368967:6369392	24	3	8	25	25	64	-1.87248	1.92118	13.7386	0.000210089	0.00581655
chr11:31724449:31725044	19	12	16	33	25	108	-1.76237	2.38949	13.7307	0.000210976	0.00583812
chr1:30832861:30833602	107	39	63	14	17	34	1.54023	2.74112	13.7225	0.000211898	0.00586064
chr10:38699286:38699852	21	4	5	50	38	19	-2.20959	1.94814	13.719	0.000212297	0.00586708
chr12:103480120:103480897	122	52	95	186	154	255	-1.29256	4.44501	13.7185	0.000212348	0.00586708
chr18:55549173:55549780	20	26	9	64	47	81	-1.7966	2.71561	13.7122	0.000213066	0.00588389
chr6:77990506:77990746	5	5	2	27	29	7	-2.65044	1.23747	13.7022	0.000214205	0.00591232
chr13:49271014:49271504	35	8	30	5	0	11	2.12798	1.20669	13.7007	0.000214373	0.00591394
chr3:132531812:132532243	24	18	11	62	38	53	-1.62798	2.45869	13.6945	0.000215086	0.00593056
chr10:20626714:20627187	45	20	20	65	47	99	-1.42244	2.90151	13.6925	0.000215314	0.00593384
chr8:80587392:80587724	34	19	11	4	4	6	2.05662	1.10561	13.6904	0.000215552	0.00593736
chr6:82016356:82017404	175	79	93	233	160	360	-1.21785	4.74848	13.6819	0.000216531	0.00596129
chr10:13096458:13097027	31	22	13	76	45	65	-1.59556	2.73154	13.6691	0.000218013	0.00599902
chr15:27861645:27861993	21	3	6	38	18	37	-1.81115	1.6846	13.6651	0.000218483	0.00600889
chr13:37568051:37568797	58	26	46	137	46	160	-1.41856	3.51201	13.6612	0.000218928	0.00601808
chr8:45432502:45433630	271	91	251	53	45	106	1.47749	4.27407	13.6544	0.000219722	0.00603683
chr10:89221172:89222015	354	169	229	101	29	151	1.44458	4.59721	13.6527	0.000219924	0.0060393
chr2:168833821:168834480	61	16	24	79	47	132	-1.48292	3.12007	13.6501	0.000220235	0.00604477
chr13:81453701:81454399	39	26	38	104	47	115	-1.38804	3.21191	13.6422	0.000221157	0.00606507
chr2:81803873:81804033	4	6	2	50	32	4	-3.01229	1.58318	13.6418	0.0002212	0.00606507
chr17:78843993:78844617	48	24	21	98	52	84	-1.46033	3.06658	13.6277	0.000222875	0.00610172
chr7:105713065:105713730	65	21	28	188	31	163	-1.78606	3.5379	13.6282	0.000222809	0.00610172
chr8:35251706:35252334	43	5	5	94	43	50	-2.17913	2.62442	13.6279	0.000222854	0.00610172
chr8:111332616:111332978	19	3	9	33	13	58	-1.81003	1.75593	13.6256	0.000223122	0.00610537
chr3:126317804:126318064	7	5	6	28	16	20	-1.92439	1.23422	13.6181	0.000224014	0.00612668
chr2:148447945:148448562	56	17	7	87	56	101	-1.83011	3.02614	13.6138	0.000224533	0.00613467
chr7:82730991:82731404	12	6	10	33	14	42	-1.6972	1.62399	13.6147	0.000224425	0.00613467
chr3:157103956:157105533	78	383	178	25	42	52	2.55189	4.47774	13.6101	0.000224971	0.00614352
chr6:39236048:39236362	6	4	12	28	18	31	-1.86253	1.45956	13.6032	0.000225803	0.00616312
chr13:51812236:51812883	34	26	61	119	68	178	-1.57193	3.5993	13.5957	0.000226704	0.00618458
chr8:26414969:26415602	36	21	36	90	35	147	-1.50563	3.14091	13.5918	0.000227173	0.00619426
chr11:86771602:86772010	35	10	9	62	44	46	-1.76149	2.45097	13.5889	0.00022753	0.00619992
chr7:120202437:120204015	253	109	163	454	238	418	-1.2131	5.3375	13.5879	0.000227644	0.00619992
chr7:59152909:59153171	5	0	2	31	46	0	-4.03579	1.46114	13.5873	0.000227726	0.00619992
chr12:74891300:74892297	98	50	101	316	130	202	-1.47953	4.49985	13.585	0.000227998	0.00620422
chr18:80819722:80820325	55	12	24	107	46	83	-1.57252	3.02735	13.571	0.000229706	0.00624754
chr18:24259862:24260794	184	74	106	232	156	445	-1.26719	4.83773	13.5654	0.000230399	0.0062605
chr9:34943112:34943601	20	4	1	39	17	34	-2.04794	1.59959	13.5652	0.000230414	0.0062605
chr13:33086874:33088018	90	61	24	235	110	194	-1.69593	4.17357	13.5641	0.000230556	0.0062612
chr4:105768734:105769031	15	6	3	65	17	19	-2.2324	1.75759	13.5598	0.000231082	0.00627231
chr2:169754297:169754628	16	6	4	58	10	34	-2.03995	1.72779	13.5544	0.000231746	0.0062872
chr8:126128512:126130011	165	412	429	107	55	132	1.9409	5.13313	13.5494	0.000232367	0.00630087
chr13:19714450:19715382	189	90	111	51	28	75	1.2726	3.71105	13.5416	0.000233339	0.00632405
chr2:151359391:151359780	22	17	10	71	39	42	-1.75215	2.44412	13.5346	0.000234201	0.00634423
chr18:47385551:47386317	49	5	16	87	21	186	-2.14214	3.0309	13.5289	0.000234922	0.00636057
chr8:109653094:109653584	13	9	4	32	20	32	-1.78406	1.59641	13.5216	0.000235839	0.00638219
chr10:59836277:59837430	152	119	90	366	180	368	-1.35887	4.9949	13.5168	0.000236436	0.00639514
chr10:25239859:25240647	53	28	38	124	85	88	-1.49918	3.45871	13.5031	0.000238169	0.00643705
chr13:3725564:3725988	23	11	4	58	31	35	-1.89134	2.12524	13.5024	0.000238262	0.00643705
[truncated: 51,990 more rows]

## Sheet: ECKO.WT.edgeR.all.peaks
List of peaks from WT vs S1pr1-ECKO FACS sorted MAECs. EdgeR cutoff of CPM>1 in at least 2 out of 3 replicates and statistics regarding differential accessibility (Figure 2B) are shown.
Row.names	CreNeg.026	CreNeg.041	CreNeg.307	CrePos.027	CrePos.040	CrePos.308	logFC	logCPM	LR	PValue	FDR
chr12:114662448:114663644	67	39	84	186	116	169	-2.00232	2.10615	85.1036	2.83134e-20	1.16691e-15
chr3:115415127:115416830	471	360	487	88	46	126	1.69534	3.05078	73.7978	8.65435e-18	1.7834e-13
chr8:106618626:106620863	749	794	1008	1450	839	1592	-1.26179	5.34195	62.1509	3.18122e-15	4.37036e-11
chrX:166581085:166595447	333	351	609	931	529	1107	-1.64943	4.62902	60.28	8.22783e-15	8.47755e-11
chr7:48427809:48429213	16	29	40	64	64	156	-2.38928	1.26739	54.9731	1.22189e-13	1.00718e-09
chr16:93992533:93993692	59	36	78	120	67	159	-1.65764	1.71121	51.3483	7.73492e-13	3.53865e-09
chr8:106600486:106601289	160	123	122	259	147	239	-1.33535	2.73148	51.2933	7.95479e-13	3.53865e-09
chr8:106574664:106575191	65	43	34	100	65	148	-1.7829	1.54007	51.1772	8.43935e-13	3.53865e-09
chrX:166622483:166627405	124	131	202	316	168	517	-1.75232	3.2068	51.1476	8.56751e-13	3.53865e-09
chrX:166616657:166619300	51	54	112	161	100	249	-1.88655	2.21505	51.1434	8.58603e-13	3.53865e-09
chrX:166596440:166599601	73	75	110	227	83	203	-1.62064	2.27796	50.8337	1.00532e-12	3.76668e-09
chr7:104944204:104945611	47	30	38	109	40	92	-1.70556	1.17101	48.816	2.8113e-12	9.65541e-09
chr4:145712029:145714273	32	52	60	135	52	189	-1.9781	1.72154	48.6136	3.11693e-12	9.88163e-09
chrX:166614481:166616548	49	52	77	131	63	218	-1.82378	1.89588	48.2078	3.83368e-12	1.12858e-08
chr11:101601163:101601990	28	40	60	96	58	99	-1.65087	1.28111	47.8298	4.64868e-12	1.27727e-08
chrX:166497111:166498943	27	44	50	109	64	78	-1.72997	1.26315	46.9831	7.16006e-12	1.84434e-08
chr12:56494038:56494588	86	92	113	174	98	173	-1.27454	2.20716	45.8144	1.30003e-11	3.15172e-08
chrX:166619414:166622401	68	55	134	192	107	321	-1.91205	2.47729	45.2047	1.77477e-11	4.06362e-08
chr8:19708676:19710175	40	71	77	129	80	229	-1.83719	1.997	44.4056	2.66922e-11	5.78996e-08
chr6:108638195:108638751	80	76	91	128	81	178	-1.29993	1.98757	42.3253	7.72848e-11	1.59261e-07
chr12:56580529:56582283	137	122	168	220	126	305	-1.25286	2.74384	42.0136	9.0641e-11	1.77889e-07
chrX:166599643:166607574	165	173	342	409	274	535	-1.51934	3.5946	41.4205	1.22762e-10	2.20169e-07
chr8:106624782:106628376	1217	1218	1112	1904	983	1951	-1.08254	5.70694	41.3577	1.26771e-10	2.20169e-07
chrX:166578236:166579489	34	55	69	104	59	138	-1.57088	1.53651	41.3356	1.2821e-10	2.20169e-07
chr12:82068575:82069537	63	71	70	124	75	117	-1.29677	1.71461	40.7642	1.7175e-10	2.8314e-07
chr7:71637577:71640443	29	26	105	176	96	317	-2.52716	2.27543	40.2071	2.28419e-10	3.6208e-07
chrX:166609700:166611888	54	85	118	176	92	217	-1.55421	2.22709	40.0381	2.49056e-10	3.8017e-07
chr1:33624271:33627213	34	41	76	80	69	131	-1.5716	1.45368	35.7922	2.1952e-09	3.23117e-06
chr7:51994012:51994599	72	26	28	96	55	125	-1.77988	1.35543	35.6478	2.36412e-09	3.35982e-06
chr8:106630730:106631412	65	43	49	98	53	93	-1.29861	1.33157	35.1571	3.04147e-09	4.17838e-06
chr1:78570226:78571257	30	60	126	154	138	359	-2.25065	2.49825	34.1849	5.01166e-09	6.66292e-06
chr1:16061559:16064839	52	70	79	111	80	314	-1.92125	2.16284	34.0276	5.43347e-09	6.99797e-06
chr2:146352233:146352892	152	130	169	225	118	231	-1.0043	2.65732	33.3911	7.53693e-09	9.41294e-06
chr13:108629379:108630259	27	45	18	51	56	100	-1.85019	0.95068	32.9585	9.41463e-09	1.14122e-05
chr10:77591176:77591789	110	124	135	194	96	222	-1.10828	2.44439	32.5458	1.16419e-08	1.28463e-05
chr4:61346449:61348698	37	51	58	70	63	197	-1.79689	1.59687	32.5352	1.17051e-08	1.28463e-05
chr9:40630782:40632348	93	170	121	255	136	262	-1.39051	2.71884	32.5247	1.17689e-08	1.28463e-05
chr2:79387480:79387861	61	61	58	102	49	125	-1.2495	1.50444	32.5122	1.18445e-08	1.28463e-05
chrX:63747162:63748795	31	51	60	66	67	147	-1.63675	1.42927	32.2288	1.37045e-08	1.44825e-05
chr8:14306663:14307403	64	118	182	235	148	438	-1.79772	2.91502	32.0898	1.47209e-08	1.51677e-05
chr4:81892019:81892898	459	308	581	142	80	162	1.13753	3.21253	31.8809	1.63925e-08	1.6478e-05
chr2:21923907:21927034	78	75	96	100	117	330	-1.77676	2.34636	31.3293	2.17772e-08	2.09774e-05
chr8:106699627:106700418	607	627	694	890	470	899	-0.875645	4.68239	31.2944	2.21718e-08	2.09774e-05
chr7:146419558:146420080	641	508	676	249	112	236	0.963002	3.70892	31.2749	2.23955e-08	2.09774e-05
chr8:106694118:106695286	378	337	355	456	307	466	-0.877049	3.83226	31.1664	2.36827e-08	2.12507e-05
chr9:40621146:40626459	498	595	612	880	451	816	-0.977234	4.57581	31.1635	2.37184e-08	2.12507e-05
chr15:38389118:38389753	20	33	35	86	20	94	-1.76252	0.857822	31.0428	2.52406e-08	2.21334e-05
chr4:71785654:71786440	288	175	245	87	42	64	1.19866	2.29847	30.8376	2.80552e-08	2.40889e-05
chr17:45694121:45695498	170	173	223	235	176	284	-0.97774	2.97042	30.7729	2.90067e-08	2.43976e-05
chr6:114290971:114291943	53	48	97	94	75	200	-1.55357	1.83321	30.6934	3.02191e-08	2.4909e-05
chr10:21414943:21415469	50	53	73	105	53	96	-1.18958	1.42231	30.3411	3.62375e-08	2.92841e-05
chr8:106622606:106623922	466	443	440	574	408	581	-0.895237	4.18178	30.2435	3.81059e-08	3.02018e-05
chr11:54774852:54775774	183	193	228	256	163	359	-1.01331	3.09132	30.0229	4.26985e-08	3.32033e-05
chr17:43544226:43544973	190	156	181	261	124	282	-0.979244	2.86976	29.4083	5.8627e-08	4.47454e-05
chr3:6300447:6302963	48	75	71	98	71	256	-1.72511	1.96741	29.2784	6.26914e-08	4.69775e-05
chr17:35099831:35100975	96	90	112	135	82	163	-1.00996	2.06505	28.9404	7.46413e-08	5.49333e-05
chr1:192956676:192957208	167	140	108	212	120	249	-1.12425	2.63193	28.6764	8.55387e-08	6.1849e-05
chr17:27963945:27964290	42	56	53	98	70	67	-1.33464	1.30454	28.5881	8.9533e-08	6.36209e-05
chr6:66956571:66958851	53	56	31	63	73	220	-1.95367	1.67349	28.3023	1.03772e-07	7.23592e-05
chr10:5744346:5745243	24	54	32	128	28	146	-1.98644	1.3812	28.2732	1.05342e-07	7.23592e-05
chr1:192123917:192127647	74	121	159	163	146	254	-1.34992	2.54263	28.0027	1.21148e-07	8.18522e-05
chrX:114201817:114203298	34	41	51	45	70	152	-1.75523	1.33628	27.9257	1.26067e-07	8.38019e-05
chr8:53390808:53393483	33	43	73	76	62	273	-2.06153	1.82686	27.8287	1.32544e-07	8.67093e-05
chr6:67007003:67007583	158	136	170	59	31	47	1.08705	1.74654	27.7508	1.37992e-07	8.88623e-05
chr1:123099315:123101305	35	50	45	51	70	218	-1.99853	1.59157	27.7206	1.4016e-07	8.88702e-05
chr17:31965027:31965513	88	89	88	134	68	146	-1.03648	1.92015	27.5432	1.53621e-07	9.59292e-05
chrX:73399390:73399808	32	46	45	48	58	147	-1.68208	1.26254	27.4257	1.6325e-07	0.000100421
chr4:146795474:146796799	28	58	51	82	52	84	-1.3266	1.1698	27.3468	1.70044e-07	0.000102264
chr12:38742274:38742894	185	135	186	71	24	46	1.18548	1.83473	27.3336	1.71208e-07	0.000102264
chr1:186085001:186085414	69	34	49	75	58	88	-1.22756	1.22999	27.2399	1.79714e-07	0.00010581
chr1:75457120:75459304	110	91	129	128	100	223	-1.11227	2.27441	27.1745	1.85893e-07	0.000106012
chr4:154217964:154219128	87	70	115	107	130	154	-1.26122	2.08172	27.1391	1.8933e-07	0.000106012
chr3:90899535:90901808	26	55	75	86	70	285	-2.09163	1.92726	27.1371	1.89524e-07	0.000106012
chr12:113512745:113513491	191	220	280	355	166	375	-1.01065	3.28317	27.1288	1.90345e-07	0.000106012
chr11:54776202:54776823	83	98	103	180	63	184	-1.1967	2.13097	27.0799	1.95215e-07	0.000107275
chr4:151559237:151560442	454	374	477	488	352	566	-0.790967	4.0574	27.0314	2.00174e-07	0.000108552
chr8:57987515:57989532	33	70	64	95	58	214	-1.7209	1.75309	26.9565	2.08092e-07	0.00011138
chr6:51068837:51069249	76	72	70	100	75	108	-1.05462	1.64977	26.7658	2.29671e-07	0.000121355
chr1:43834387:43835817	38	66	92	102	66	183	-1.47178	1.77805	26.3628	2.82931e-07	0.000147604
chr16:33786834:33787777	49	113	78	166	79	183	-1.43848	2.07737	26.0331	3.35615e-07	0.000172901
chr18:75569416:75570678	224	320	301	411	234	442	-1.00517	3.58455	25.9565	3.49205e-07	0.000177681
chr11:48868066:48868681	91	74	105	118	75	142	-0.978852	1.89886	25.9139	3.56985e-07	0.000179424
chr13:59819778:59821043	246	212	335	298	231	482	-1.02132	3.47778	25.7366	3.91342e-07	0.000194322
chr2:57074161:57075243	106	78	76	111	139	136	-1.31474	2.06294	25.6913	4.00635e-07	0.000196569
chr7:105692989:105693705	194	215	198	304	153	283	-0.928841	3.05294	25.6413	4.11138e-07	0.000199348
chr3:90901828:90903141	17	48	38	48	52	126	-1.76297	1.07915	24.8076	6.33484e-07	0.000301011
chr10:84876572:84881871	66	100	227	239	168	315	-1.56607	2.82729	24.8017	6.35415e-07	0.000301011
chr1:74481816:74482558	144	149	166	181	129	222	-0.882495	2.61213	24.779	6.4295e-07	0.00030112
chr17:28548338:28549022	155	96	166	52	25	41	1.14092	1.57261	24.5338	7.30189e-07	0.000338135
chr3:21598346:21598809	82	97	80	122	88	122	-1.03215	1.89016	24.4788	7.51308e-07	0.000344049
chr6:121600382:121603970	30	30	87	72	72	325	-2.29102	1.9713	24.3189	8.16321e-07	0.000365188
chr10:27538433:27544714	107	177	236	222	216	725	-1.77564	3.42258	24.3075	8.21167e-07	0.000365188
chr4:138019680:138020171	94	98	90	138	70	149	-0.981229	1.97725	24.3008	8.24053e-07	0.000365188
chr5:139954966:139955462	60	72	60	91	62	99	-1.05583	1.47416	24.1126	9.0862e-07	0.000398382
chr2:152552416:152553094	97	103	114	120	90	221	-1.09985	2.20535	24.0429	9.42132e-07	0.000408727
chrX:166506825:166509677	38	93	121	186	80	213	-1.54049	2.19926	23.9458	9.90857e-07	0.000425387
chr15:31298774:31299311	64	60	58	85	47	111	-1.05994	1.39517	23.7689	1.08622e-06	0.000461521
chr3:88098893:88099435	150	120	134	134	150	332	-1.27366	2.68219	23.6671	1.14523e-06	0.000481628
chr8:86137405:86138705	123	119	125	192	87	168	-0.929715	2.32025	23.5669	1.20647e-06	0.000502256
chr17:31918026:31918752	143	101	99	162	92	171	-0.966094	2.24387	23.4405	1.28834e-06	0.000528571
chr15:39005264:39006264	125	127	129	129	153	227	-1.11881	2.49458	23.412	1.30763e-06	0.000528571
chr5:15163940:15166361	29	53	78	104	42	141	-1.45237	1.47597	23.4112	1.30815e-06	0.000528571
chr2:130931074:130931701	136	99	145	155	93	225	-0.966653	2.38211	23.3531	1.34823e-06	0.000539474
chr9:20829869:20832244	82	218	149	330	151	363	-1.49998	3.03759	23.3094	1.37922e-06	0.000546568
chr5:92692826:92693365	147	80	136	46	20	33	1.19579	1.36696	23.2875	1.39504e-06	0.000547573
chr7:119642709:119644022	540	537	591	653	391	692	-0.717484	4.37353	23.2218	1.44354e-06	0.000561264
chr15:54640725:54641372	135	142	165	180	127	194	-0.858983	2.54195	23.1997	1.46016e-06	0.000562423
chr5:115102714:115105437	1795	1900	1992	2118	1336	2603	-0.741197	6.16209	22.8742	1.7296e-06	0.000660036
chr4:154220351:154221443	72	55	89	83	93	108	-1.12184	1.65963	22.8354	1.76487e-06	0.000667315
chr18:76216403:76217376	268	260	339	309	237	412	-0.822414	3.48709	22.7695	1.82641e-06	0.000684308
chr2:80652740:80657389	95	133	127	146	122	509	-1.70792	2.83358	22.7017	1.89205e-06	0.000696649
chr10:77597214:77598399	347	446	502	507	352	851	-1.03646	4.21522	22.7005	1.89316e-06	0.000696649
chrX:32105041:32107565	21	49	85	126	46	322	-2.22161	2.02785	22.6806	1.91285e-06	0.000697664
chr10:77598662:77599038	45	58	99	118	51	132	-1.21322	1.635	22.5987	1.99618e-06	0.00072167
chr4:132730145:132730725	187	97	228	50	19	64	1.29189	1.80822	22.5099	2.09059e-06	0.00074923
chr6:147499013:147503356	58	84	86	65	155	300	-1.87945	2.29691	22.4461	2.16123e-06	0.000767869
chr6:91168244:91169168	395	299	383	543	277	400	-0.854119	3.81837	22.3184	2.30988e-06	0.000813669
chr18:61665708:61666495	170	119	160	46	38	56	0.992956	1.72533	22.2741	2.36379e-06	0.000825603
chr9:20822723:20823733	57	107	92	124	85	149	-1.13563	1.94609	22.2496	2.39405e-06	0.000829145
chr9:61186888:61187392	55	84	94	139	65	112	-1.0894	1.77025	22.0903	2.60121e-06	0.000887656
chr3:115811780:115812720	69	68	57	88	48	133	-1.09701	1.51729	22.0867	2.60606e-06	0.000887656
chr7:52710055:52712028	257	245	256	348	175	316	-0.797011	3.28459	22.02	2.69819e-06	0.000911503
chr5:103128594:103131494	41	73	84	81	76	294	-1.78156	2.03594	21.9171	2.8469e-06	0.000946401
chr17:34244097:34244843	56	75	67	105	54	98	-1.02451	1.49897	21.9167	2.84743e-06	0.000946401
chr5:114009324:114009838	150	86	134	42	20	47	1.0971	1.42052	21.8472	2.9525e-06	0.000965375
chr3:35048146:35049165	326	225	479	98	66	141	1.0754	2.84712	21.8453	2.95547e-06	0.000965375
chr11:96261973:96262439	71	86	88	133	67	107	-0.982875	1.77411	21.8328	2.97478e-06	0.000965375
chr12:74310057:74310573	187	72	199	50	14	41	1.46606	1.60989	21.8024	3.02214e-06	0.000973082
chr12:87953195:87953991	123	138	175	181	107	229	-0.89702	2.54389	21.7709	3.07219e-06	0.000981528
chr18:70126518:70127788	728	468	827	249	146	297	0.876251	3.87335	21.7484	3.10847e-06	0.000985479
chr2:33789368:33790008	42	45	63	49	60	132	-1.35419	1.30075	21.6886	3.2069e-06	0.00100892
chr7:146833860:146834378	165	138	164	65	35	52	0.94665	1.79709	21.655	3.26363e-06	0.001019
chr11:53885889:53886683	128	128	130	175	88	187	-0.863886	2.35301	21.4939	3.54962e-06	0.00109482
chr4:137034075:137034566	66	82	76	102	53	155	-1.08695	1.7189	21.4799	3.57562e-06	0.00109482
chr7:17438411:17439389	256	209	243	273	161	385	-0.851413	3.21513	21.4742	3.58617e-06	0.00109482
chr18:63132372:63132708	142	91	144	46	12	51	1.15231	1.43092	21.435	3.66038e-06	0.00110926
chr3:6303020:6306239	40	93	78	106	74	377	-1.94572	2.27918	21.2647	4.00028e-06	0.00120341
chr8:3311255:3311958	192	68	222	43	22	45	1.43821	1.68199	21.2242	4.08584e-06	0.00122024
chr1:74853119:74853523	74	74	56	86	56	136	-1.0806	1.58069	21.1751	4.19184e-06	0.00124289
chrX:92159056:92161872	49	38	94	61	87	355	-2.10131	2.12059	21.0947	4.37145e-06	0.00128689
chr2:22854132:22854898	64	71	41	117	47	95	-1.17867	1.44191	20.9135	4.80487e-06	0.00140445
chr8:37226682:37227616	365	329	360	438	237	424	-0.716431	3.70882	20.8226	5.03845e-06	0.00146167
chr8:127626120:127626585	73	68	86	107	56	108	-0.913873	1.61345	20.8101	5.07156e-06	0.00146167
chr12:40922908:40923730	55	69	50	85	53	88	-1.03215	1.32226	20.7428	5.2529e-06	0.00149893
chr6:115938996:115939806	156	206	234	255	150	297	-0.885726	2.99394	20.7353	5.27358e-06	0.00149893
chr2:34809334:34810443	382	318	427	428	245	573	-0.7901	3.84322	20.6669	5.46535e-06	0.0015428
chr1:91034567:91035566	535	296	613	173	103	183	0.965058	3.35874	20.608	5.6361e-06	0.00157816
chr5:143020954:143021640	149	68	159	234	97	186	-1.126	2.45546	20.5899	5.68946e-06	0.00157816
chr4:116803087:116803834	46	51	83	92	58	81	-1.04508	1.35615	20.5845	5.70548e-06	0.00157816
chr16:33743337:33744148	61	67	69	74	59	116	-0.999112	1.46981	20.556	5.79119e-06	0.00158769
chr17:81174380:81175097	294	113	314	75	41	67	1.27651	2.28241	20.5359	5.85243e-06	0.00158769
chr1:123379975:123381669	37	26	57	38	56	103	-1.42002	1.00659	20.5349	5.85552e-06	0.00158769
chr3:128639568:128639772	54	58	60	55	68	118	-1.16915	1.38007	20.4766	6.03656e-06	0.00162608
chr7:79795984:79798792	62	78	94	81	82	294	-1.57455	2.11634	20.3675	6.39072e-06	0.00171031
chr4:154216390:154217797	120	106	144	125	127	181	-0.932122	2.32287	20.2454	6.81183e-06	0.00181124
chr9:20826109:20827245	61	126	70	150	76	197	-1.30923	2.0943	20.1752	7.06644e-06	0.0018669
chr10:53888911:53889536	157	120	153	58	30	55	0.920689	1.68626	20.1437	7.18353e-06	0.00188575
chr8:19718870:19720712	42	77	51	81	49	182	-1.45254	1.59392	20.0486	7.54981e-06	0.00196935
chr9:106152413:106152944	69	93	91	98	75	141	-0.970921	1.81512	19.9619	7.89999e-06	0.00204774
chr18:76212521:76213351	168	226	190	286	132	322	-0.954332	3.02181	19.8744	8.26997e-06	0.00213024
chr14:78882535:78882992	187	109	144	41	36	57	1.02573	1.68596	19.7817	8.68085e-06	0.00222219
chr9:48413014:48413796	276	218	276	115	56	108	0.804488	2.53923	19.7338	8.90132e-06	0.00226456
chr5:108431619:108432439	250	368	313	413	232	522	-0.947932	3.693	19.7202	8.96496e-06	0.00226676
chr2:56961700:56963191	154	183	166	180	158	246	-0.893382	2.75909	19.7	9.06012e-06	0.00227685
chr11:68520012:68520702	207	137	230	77	43	70	0.912753	2.08339	19.6661	9.22227e-06	0.00230356
chr13:114275751:114276132	86	70	58	107	51	114	-0.983629	1.58263	19.6111	9.49171e-06	0.00235658
chr10:95897647:95898255	125	116	131	162	84	168	-0.806073	2.2601	19.5988	9.55292e-06	0.00235757
chr7:29153021:29154180	116	57	110	132	96	118	-1.00305	1.96758	19.5778	9.65873e-06	0.00236949
chr2:56960403:56961665	87	105	126	119	91	165	-0.906848	2.09691	19.5519	9.79044e-06	0.00238759
chr8:93601334:93601664	72	113	123	24	22	39	1.18778	1.16304	19.5328	9.88881e-06	0.0023974
chrX:166629310:166631817	36	89	111	162	64	186	-1.40795	2.01345	19.4747	1.01943e-05	0.00245699
chr1:161982837:161983403	110	126	93	157	74	209	-1.02575	2.24088	19.4354	1.04058e-05	0.0024934
chr9:48890996:48891693	285	114	274	80	32	70	1.21629	2.20633	19.4141	1.05227e-05	0.00250683
chr11:6575375:6575885	51	58	115	97	70	137	-1.11842	1.71048	19.3678	1.07811e-05	0.00255363
chr17:29241111:29242475	81	83	135	100	102	191	-1.08237	2.10678	19.2894	1.12327e-05	0.00264539
chr5:117754792:117755298	284	230	283	111	73	107	0.772587	2.60191	19.2653	1.13754e-05	0.00266216
chr4:116800500:116802059	135	144	147	191	113	166	-0.811095	2.46342	19.2485	1.14762e-05	0.00266216
chr11:53594313:53596436	199	296	208	344	187	363	-0.972496	3.30936	19.2449	1.14977e-05	0.00266216
chr7:105721616:105722355	234	209	262	267	152	358	-0.783743	3.16515	19.2217	1.16385e-05	0.00267971
chr8:56197595:56199756	106	276	207	375	165	544	-1.44608	3.3914	19.1124	1.23244e-05	0.00282189
chr6:108274033:108275029	468	583	497	602	382	810	-0.846301	4.35985	19.073	1.25809e-05	0.00285622
chr10:85490865:85491562	274	196	394	114	21	89	1.34017	2.53159	19.0682	1.2613e-05	0.00285622
chr14:26434056:26434603	134	99	123	147	77	188	-0.854341	2.22243	18.9267	1.35839e-05	0.00304823
chr8:74796266:74796937	214	165	181	77	42	77	0.851682	2.08062	18.9198	1.36327e-05	0.00304823
chr11:120117888:120118787	542	445	500	537	324	691	-0.710102	4.19995	18.9092	1.37091e-05	0.00304823
chr4:154214997:154215725	67	27	51	53	54	98	-1.19269	1.13184	18.9026	1.37568e-05	0.00304823
chr1:135961210:135962416	544	482	534	570	333	693	-0.680675	4.25257	18.8386	1.42256e-05	0.00313526
chr1:145574866:145575547	243	191	109	51	29	67	1.25506	1.93924	18.7746	1.47115e-05	0.00322511
chr13:15390168:15390638	233	173	199	95	44	59	0.939618	2.16052	18.7455	1.49379e-05	0.00325742
chr11:103147164:103147681	152	173	173	73	32	64	0.911808	1.90406	18.702	1.52822e-05	0.00331495
chr4:146793702:146795422	28	74	76	140	40	164	-1.51571	1.69988	18.6582	1.5637e-05	0.00337416
chr17:88969332:88970087	134	158	278	77	34	42	1.21191	1.98955	18.6425	1.57669e-05	0.00338431
chr5:64751158:64752163	266	172	287	257	191	338	-0.803528	3.20519	18.6327	1.58483e-05	0.00338431
chr7:35839773:35840304	121	98	111	149	69	160	-0.837198	2.1059	18.4859	1.71168e-05	0.00363634
chr11:53589046:53589778	65	83	43	83	64	121	-1.13012	1.52917	18.4694	1.72652e-05	0.00364907
chr17:29242517:29246069	220	301	416	294	389	676	-1.23913	3.87291	18.3793	1.81017e-05	0.00380634
chr3:27222417:27222933	69	87	99	106	58	168	-1.00527	1.84711	18.3498	1.83843e-05	0.00384614
chr14:46623570:46624308	189	111	196	64	25	70	0.98769	1.85372	18.3028	1.88435e-05	0.00391981
chr17:46210407:46211860	1000	1068	1311	1178	777	1533	-0.703571	5.38096	18.2937	1.89329e-05	0.00391981
chr15:79854453:79855067	139	105	130	171	78	172	-0.816459	2.27016	18.2848	1.90217e-05	0.00391981
chr12:40305650:40306382	220	155	233	84	40	90	0.846383	2.18689	18.2626	1.92447e-05	0.00394602
chr4:31862970:31865643	43	71	86	77	61	245	-1.53043	1.86308	18.2254	1.96246e-05	0.00400399
chr6:28368217:28368857	257	194	232	86	54	108	0.79762	2.37439	18.2068	1.98172e-05	0.00402338
chr14:66417411:66417911	61	50	89	92	46	107	-0.948417	1.44529	18.1799	2.00991e-05	0.00406061
chr17:88680645:88681331	145	86	206	54	26	47	1.09641	1.64024	18.1354	2.05738e-05	0.00410977
chr4:133844332:133844937	130	84	127	21	25	53	1.10211	1.30964	18.1331	2.05994e-05	0.00410977
chr18:60824792:60825599	128	158	125	180	102	196	-0.858518	2.45147	18.1292	2.06416e-05	0.00410977
chr8:125222933:125223431	71	34	77	87	43	106	-1.03281	1.35691	18.1022	2.09361e-05	0.00414837
chr4:107825765:107826854	88	84	73	104	141	98	-1.26097	1.93812	18.0535	2.14787e-05	0.00423552
chr2:25404911:25405418	129	116	144	163	124	139	-0.836485	2.33946	18.027	2.17791e-05	0.0042743
chr18:82863393:82864572	122	107	89	126	176	137	-1.23676	2.30312	18.006	2.20209e-05	0.00430128
chr6:113473371:113473959	222	217	212	222	167	318	-0.779312	3.05663	17.9852	2.22627e-05	0.00431853
chr15:31209314:31209640	65	38	55	49	62	101	-1.12482	1.21598	17.9804	2.23188e-05	0.00431853
chr1:196384404:196384901	132	80	210	50	21	46	1.17284	1.5692	17.9598	2.25618e-05	0.00434515
chr16:85103293:85103920	306	130	329	96	40	80	1.14799	2.40242	17.9431	2.27613e-05	0.00436318
chr15:10744021:10744853	167	223	267	330	151	293	-0.877791	3.12866	17.8503	2.38981e-05	0.0045599
chr11:101746409:101746986	161	168	219	258	105	297	-0.887508	2.86873	17.7822	2.47686e-05	0.00470422
chr3:102164542:102165163	115	101	136	45	21	52	0.918906	1.40749	17.7206	2.55843e-05	0.00483685
chr12:21341717:21342377	181	157	180	220	106	232	-0.750353	2.70238	17.7076	2.57598e-05	0.00484777
chr11:53590809:53594183	315	466	372	470	328	546	-0.875099	3.95692	17.6967	2.59069e-05	0.0048533
chr10:18783056:18783762	218	164	196	85	42	81	0.813685	2.13406	17.683	2.60947e-05	0.00486637
chr10:69880509:69881346	466	386	408	181	121	123	0.865083	3.22445	17.6546	2.6488e-05	0.00491747
chr17:71364192:71364664	149	81	128	44	22	47	0.993576	1.40337	17.6145	2.70517e-05	0.00499959
chr13:5840410:5841268	398	327	374	170	102	128	0.772817	3.05899	17.601	2.72452e-05	0.00500442
chr9:14938993:14940770	43	53	38	39	60	111	-1.31935	1.1306	17.5946	2.73364e-05	0.00500442
chr2:26410557:26411053	159	119	190	65	16	67	1.03433	1.76375	17.5873	2.74421e-05	0.00500442
chr1:193215145:193215713	281	203	266	111	54	112	0.778716	2.50868	17.5655	2.77579e-05	0.00502128
chr10:44866784:44867464	211	147	215	75	51	76	0.817325	2.11636	17.5641	2.77782e-05	0.00502128
chr15:100911309:100911931	124	72	82	101	82	155	-0.955039	1.92789	17.5517	2.79593e-05	0.00503195
chr19:54808141:54808938	360	211	323	122	68	127	0.82291	2.73614	17.492	2.88524e-05	0.00516219
chr9:13338676:13339393	52	38	64	46	82	89	-1.25342	1.24637	17.4866	2.89335e-05	0.00516219
chr8:19854634:19855572	56	75	42	87	40	154	-1.27332	1.49561	17.4591	2.93558e-05	0.00520196
chr18:4504150:4505164	135	126	156	179	94	170	-0.7472	2.38644	17.4556	2.94099e-05	0.00520196
chr4:28103865:28104255	54	159	113	204	92	299	-1.43536	2.52989	17.4475	2.95351e-05	0.00520196
chr12:101566626:101567419	455	227	527	147	73	160	0.997996	3.09282	17.434	2.97453e-05	0.0052167
chr3:107578440:107579046	126	169	143	186	102	232	-0.875173	2.55394	17.4228	2.99215e-05	0.00522537
chr15:83126474:83126869	70	71	47	87	53	93	-0.960639	1.3889	17.3806	3.05932e-05	0.00532012
chr14:46169925:46170395	116	70	140	42	21	37	1.02203	1.26193	17.3675	3.08044e-05	0.00533433
chr2:181217807:181218888	750	792	819	841	516	1042	-0.669355	4.84917	17.3499	3.10908e-05	0.00536141
chr3:22899895:22900585	220	207	353	114	55	93	0.900175	2.51855	17.3158	3.16547e-05	0.0054359
chr11:48796196:48796779	94	86	95	95	84	127	-0.839023	1.84634	17.2946	3.2009e-05	0.00545052
chr3:115352571:115352970	112	66	105	115	63	159	-0.902269	1.91499	17.2883	3.2115e-05	0.00545052
chr4:154221890:154223281	125	80	135	113	140	157	-1.01867	2.24095	17.2871	3.21366e-05	0.00545052
chr3:137966937:137967800	461	271	458	176	76	165	0.855903	3.12643	17.2233	3.32332e-05	0.00561341
chr4:154219207:154220309	103	66	112	85	119	153	-1.08574	2.00846	17.1958	3.37176e-05	0.005672
chr7:31474375:31475229	84	71	56	77	119	100	-1.25194	1.7168	17.1653	3.42646e-05	0.0057343
chr13:94013020:94013386	133	76	135	45	23	41	0.978472	1.35068	17.1596	3.43663e-05	0.0057343
chr15:11235964:11236508	142	50	158	35	9	40	1.41087	1.2524	17.1373	3.47719e-05	0.00577859
chr11:67905398:67906155	267	249	328	359	184	321	-0.695259	3.36936	17.0763	3.59083e-05	0.00594347
chr1:154568048:154569222	366	424	361	402	292	626	-0.837161	3.92447	17.0587	3.62412e-05	0.00597457
chr11:9564144:9565116	431	481	529	499	331	714	-0.745506	4.1814	17.0466	3.64735e-05	0.00598893
chr1:140738000:140738647	132	92	124	45	26	46	0.899043	1.39773	17.0335	3.67257e-05	0.00600639
chr12:81204280:81205324	89	136	109	151	80	183	-0.93337	2.20311	17.0078	3.72263e-05	0.00606174
chr10:61980291:61980805	73	61	83	81	57	108	-0.850106	1.50809	17.0011	3.73582e-05	0.00606174
chr5:44526134:44527248	103	80	70	103	115	101	-1.07501	1.86758	16.9626	3.81235e-05	0.00614878
chr10:85626680:85627277	101	95	85	118	60	157	-0.881749	1.91147	16.9591	3.8193e-05	0.00614878
chr4:9637896:9638577	191	121	137	66	29	53	0.940195	1.74193	16.9432	3.85157e-05	0.0061766
chr3:115410220:115411328	155	105	145	53	32	54	0.866214	1.61732	16.9224	3.89384e-05	0.00622018
chr18:11492080:11492801	176	238	240	274	144	345	-0.847818	3.1104	16.9071	3.92553e-05	0.0062466
chrX:103381493:103383423	4533	3719	4918	1910	1288	2326	0.58055	6.68487	16.8911	3.9586e-05	0.00627498
chr4:6358659:6359730	18	13	36	13	56	90	-2.00212	0.562776	16.8759	3.99054e-05	0.00630138
chr8:122711981:122712860	183	178	199	228	119	235	-0.705809	2.78984	16.8594	4.02528e-05	0.00633198
chr14:70953373:70954947	575	570	524	611	374	728	-0.684008	4.36065	16.8458	4.05437e-05	0.00633431
chr3:9861164:9861705	140	58	153	35	25	36	1.15873	1.31952	16.8362	4.0749e-05	0.00633431
chr15:79193267:79194085	55	76	55	87	48	95	-0.946348	1.36742	16.8314	4.08521e-05	0.00633431
chr2:162921422:162921895	100	105	140	45	26	44	0.913154	1.38487	16.83	4.08824e-05	0.00633431
chr1:129977012:129978320	782	426	732	293	139	243	0.850432	3.82228	16.8147	4.12135e-05	0.0063617
chr16:93715805:93716590	378	465	480	196	120	168	0.778789	3.32879	16.7886	4.17831e-05	0.00641889
chr4:141627177:141628005	106	120	128	33	15	63	1.05087	1.38728	16.7801	4.1971e-05	0.00641889
chr18:76238669:76239304	234	231	239	298	135	383	-0.826288	3.199	16.7765	4.20512e-05	0.00641889
chr4:11635983:11637307	117	107	141	172	78	150	-0.785326	2.21607	16.6996	4.37891e-05	0.00665423
chr10:26792173:26792756	161	113	153	62	30	57	0.852133	1.69489	16.6942	4.39159e-05	0.00665423
chr2:148690547:148691430	292	201	242	97	71	95	0.79119	2.48062	16.674	4.4386e-05	0.00670083
chr1:164024035:164024682	151	105	139	62	29	25	1.0753	1.52347	16.6363	4.52763e-05	0.00681029
chr8:90863827:90864579	439	260	411	178	69	135	0.882507	3.02143	16.6232	4.55889e-05	0.00682251
chr17:84859876:84863413	99	131	157	106	152	377	-1.36934	2.69059	16.6191	4.56887e-05	0.00682251
chr11:50010204:50011453	134	174	113	170	129	206	-0.920117	2.53096	16.6033	4.60706e-05	0.00685471
chr14:121229562:121230049	187	141	215	184	127	312	-0.851539	2.82327	16.5633	4.70528e-05	0.00697566
chr12:82065682:82066595	62	79	94	89	64	119	-0.875634	1.64393	16.5518	4.73401e-05	0.00699309
chr11:53596537:53597998	80	197	126	233	125	241	-1.18527	2.65703	16.5351	4.77584e-05	0.00702969
chr3:153365130:153365799	315	236	342	142	77	93	0.825951	2.73809	16.5234	4.80529e-05	0.00703932
chr6:89599750:89600878	381	320	409	456	230	419	-0.651085	3.7379	16.519	4.81654e-05	0.00703932
chr14:70492903:70494739	136	185	221	214	134	261	-0.82311	2.81597	16.4646	4.95682e-05	0.00721874
chr11:99874987:99875507	149	123	194	71	29	61	0.871743	1.80694	16.3954	5.14091e-05	0.00746048
chr7:96555115:96556457	425	339	488	199	87	194	0.734535	3.24733	16.3724	5.20387e-05	0.00752534
chr17:56309161:56310357	471	408	471	464	287	572	-0.626534	4.00957	16.3401	5.29313e-05	0.00762766
chr13:43537887:43538332	123	92	134	54	26	35	0.921868	1.39389	16.3209	5.34716e-05	0.00767867
chr8:74349688:74352012	42	108	61	162	49	166	-1.38889	1.87688	16.2717	5.48783e-05	0.00784946
chr7:71000089:71000583	191	145	204	71	43	84	0.777697	2.04637	16.2607	5.51965e-05	0.00784946
chr8:14967579:14968645	860	659	785	365	215	362	0.620991	4.1666	16.2595	5.52323e-05	0.00784946
chr16:90529905:90530238	141	84	123	50	28	32	0.96989	1.37495	16.2198	5.64001e-05	0.00797817
chr4:135733085:135734477	436	499	479	519	356	548	-0.67978	4.11923	16.2157	5.65251e-05	0.00797817
chrX:143877783:143878517	171	79	175	48	32	49	1.01889	1.62516	16.2042	5.68675e-05	0.0079991
chr1:88344086:88345194	292	309	421	523	252	357	-0.818483	3.72138	16.1719	5.78455e-05	0.00810899
chr1:167050444:167050900	124	124	185	59	29	61	0.876024	1.70654	16.1524	5.84431e-05	0.00816499
chrX:89086883:89088738	23	56	63	47	56	217	-1.76498	1.54638	16.1099	5.97701e-05	0.00830839
chr12:83508826:83510005	339	305	357	147	83	168	0.674431	2.95951	16.1061	5.98915e-05	0.00830839
chr18:35867460:35868050	84	84	62	136	54	98	-0.957927	1.67713	16.1003	6.00742e-05	0.00830839
chr3:27365172:27365777	254	183	291	99	60	111	0.755176	2.46974	16.0674	6.11263e-05	0.00842562
chr9:48591175:48591791	166	56	148	46	17	34	1.25199	1.36823	16.0517	6.16365e-05	0.00846763
chr1:11023149:11024163	848	812	843	393	222	422	0.620216	4.29304	16.0331	6.2244e-05	0.00851418
chr2:137434211:137434727	214	129	193	89	32	51	0.974058	1.97141	16.0287	6.23885e-05	0.00851418
chr4:118633504:118634413	808	397	743	262	163	228	0.87139	3.81775	15.9923	6.36022e-05	0.00865116
chr17:29239671:29241071	60	67	152	90	103	299	-1.47803	2.27039	15.9578	6.47712e-05	0.00874935
chr2:32197956:32198871	255	220	217	269	174	257	-0.691427	3.08954	15.9547	6.48753e-05	0.00874935
chr3:58917800:58918435	285	194	270	97	65	118	0.743643	2.51767	15.9522	6.4961e-05	0.00874935
chr19:10859019:10860073	523	469	596	571	316	765	-0.694606	4.28225	15.9168	6.61883e-05	0.00888562
chr11:104467810:104468560	129	110	135	149	82	159	-0.719122	2.2126	15.9079	6.65009e-05	0.0088986
chr10:41157181:41158196	87	59	73	85	142	84	-1.32778	1.79676	15.8422	6.88505e-05	0.00917762
chr11:87926827:87927577	613	250	547	195	82	152	1.04339	3.29771	15.8372	6.90314e-05	0.00917762
chr11:53631801:53633038	471	618	635	610	408	952	-0.825573	4.49589	15.7576	7.19995e-05	0.00954144
chr10:47176027:47176465	103	85	109	91	88	153	-0.844926	1.95492	15.7107	7.38047e-05	0.00974931
chr1:45757715:45758558	231	230	272	108	73	88	0.756993	2.4929	15.6987	7.42748e-05	0.00978007
chrX:32098110:32102535	56	111	204	226	82	597	-1.83581	2.97851	15.686	7.47739e-05	0.00981443
chr15:66970092:66970971	181	292	229	272	184	430	-0.956881	3.29523	15.6749	7.52154e-05	0.00982262
chr9:61184694:61185579	618	708	657	710	437	992	-0.739841	4.64632	15.6725	7.5313e-05	0.00982262
chr3:121067614:121068565	270	235	266	100	69	129	0.705229	2.58047	15.6578	7.58994e-05	0.00986788
chr13:102487398:102488331	1243	1100	1335	589	383	513	0.61803	4.83996	15.6365	7.67577e-05	0.0099328
chr6:93752305:93752804	196	135	161	66	43	67	0.805232	1.91199	15.6335	7.68807e-05	0.0099328
chr2:93298554:93299629	290	416	334	453	263	446	-0.80416	3.76249	15.6108	7.78103e-05	0.0100215
chr15:79183669:79185731	244	270	264	328	167	312	-0.697316	3.26575	15.5936	7.85216e-05	0.0100628
chr11:106553692:106554798	188	148	173	58	43	84	0.791792	1.96506	15.5912	7.86195e-05	0.0100628
chr15:91822403:91824463	47	74	42	50	60	256	-1.72702	1.74158	15.5602	7.99183e-05	0.0101974
chr8:125239578:125240201	196	166	210	244	104	290	-0.781599	2.8628	15.551	8.0308e-05	0.0102155
chr17:63086823:63087041	87	95	90	71	104	213	-1.18332	2.05442	15.5347	8.10027e-05	0.0102721
chr12:40931548:40932622	103	98	83	140	62	123	-0.833238	1.89792	15.5257	8.13917e-05	0.0102898
chr5:20834320:20834770	153	101	149	63	24	52	0.875761	1.60403	15.5013	8.24486e-05	0.0103916
chr3:115504290:115504759	87	80	126	117	60	170	-0.881876	1.95625	15.4805	8.33607e-05	0.0104745
chr3:88397702:88398499	70	111	202	244	87	240	-1.19872	2.54872	15.4087	8.659e-05	0.0108472
chr9:33999426:34000401	233	152	358	90	55	95	0.935469	2.42688	15.3746	8.8165e-05	0.011011
chr10:71756043:71756219	71	72	58	63	62	127	-0.983248	1.49465	15.3567	8.90045e-05	0.0110823
chr15:79867464:79868360	148	120	145	210	88	155	-0.785172	2.39575	15.3179	9.08495e-05	0.0112779
chr2:59262679:59263079	162	122	225	74	43	49	0.913905	1.91352	15.3122	9.11255e-05	0.0112782
chr15:96643885:96644612	114	93	211	174	95	300	-1.08274	2.58483	15.2964	9.18892e-05	0.0113387
chr9:40626520:40627276	53	81	32	97	55	86	-1.15141	1.3515	15.2398	9.46888e-05	0.0116457
chrX:32094972:32098058	27	76	137	177	52	428	-1.99098	2.47634	15.2347	9.49426e-05	0.0116457
chr7:150852394:150853371	199	196	259	239	133	361	-0.796174	3.06492	15.1769	9.78945e-05	0.0119722
chr2:29291284:29291741	86	79	103	109	57	125	-0.771328	1.7646	15.166	9.84629e-05	0.0120061
chr1:35991865:35992511	346	180	285	115	68	94	0.855371	2.58664	15.155	9.90363e-05	0.0120404
chr4:95397193:95398220	232	195	280	111	53	106	0.727648	2.44135	15.109	0.000101481	0.0123013
chr5:64755535:64756258	203	140	228	165	171	319	-0.892327	2.91601	15.0959	0.000102185	0.0123171
chr2:102059791:102060450	116	138	118	29	31	60	0.970287	1.48705	15.0955	0.000102209	0.0123171
chr17:28556631:28557836	686	255	548	215	70	136	1.16482	3.33944	15.0178	0.000106501	0.0127886
chr11:72807821:72808455	158	186	134	191	120	222	-0.800817	2.63647	15.0135	0.000106743	0.0127886
chr11:96587126:96587546	139	119	147	69	25	49	0.847005	1.62647	14.9775	0.0001088	0.0129973
chr7:133819623:133820447	308	136	330	97	39	104	1.03199	2.45361	14.9568	0.000109999	0.0131026
chr9:46037803:46038505	406	291	367	162	98	161	0.662844	3.04657	14.9337	0.000111358	0.0132263
chr17:68567520:68568202	256	153	225	78	55	96	0.786718	2.26611	14.9223	0.00011203	0.0132678
chr5:67923950:67924467	156	86	170	48	28	61	0.912	1.61615	14.9131	0.000112579	0.0132947
chr16:10741210:10741654	286	169	267	71	62	117	0.84336	2.42796	14.9021	0.000113234	0.0133338
chr4:93511027:93511247	84	99	74	70	105	180	-1.14848	1.95439	14.8755	0.000114842	0.0134846
chr9:100945907:100946627	176	244	191	231	149	325	-0.836293	3.01437	14.8614	0.00011571	0.0135479
chr19:32018718:32018985	122	110	117	106	120	158	-0.846851	2.19209	14.8542	0.000116149	0.0135608
chr11:53128119:53128736	506	315	771	213	105	207	0.921975	3.5058	14.8234	0.000118062	0.0137453
chr12:88159953:88160481	100	126	55	141	81	164	-1.07483	2.05966	14.7852	0.000120477	0.0139847
chr16:57927849:57928890	660	315	525	212	124	169	0.870788	3.44934	14.7793	0.000120857	0.0139847
chr10:16758399:16758882	148	76	159	49	31	42	0.948854	1.50349	14.7705	0.000121423	0.0139847
chr13:97450165:97450687	77	75	58	94	60	84	-0.849033	1.47503	14.7696	0.000121476	0.0139847
chr9:102535289:102535671	125	101	152	58	21	54	0.853222	1.52222	14.7541	0.000122478	0.0140608
chr8:13539924:13540506	218	189	177	96	48	57	0.867087	2.14145	14.746	0.000123008	0.0140824
chr17:12209570:12212121	56	66	101	82	51	260	-1.39931	1.92087	14.7112	0.000125303	0.0143053
chr2:103744295:103744853	154	114	127	163	87	161	-0.715703	2.29067	14.7015	0.000125944	0.0143086
chr15:64950410:64951274	88	45	80	64	77	118	-0.996353	1.55541	14.7003	0.000126026	0.0143086
chr7:29702323:29703597	551	426	708	248	136	276	0.686491	3.68278	14.664	0.000128477	0.0145469
chr17:80192976:80193491	106	84	113	132	61	131	-0.748063	1.9248	14.6474	0.000129613	0.0146352
chr4:82579500:82580063	143	109	123	41	37	53	0.831553	1.52879	14.6392	0.000130176	0.0146587
chr12:56561410:56562333	400	369	436	437	232	611	-0.714076	3.89923	14.6128	0.000132013	0.014825
chr7:121723935:121724322	125	84	144	45	27	50	0.853817	1.42473	14.6028	0.00013272	0.014864
chr9:55080754:55081192	179	122	124	33	24	77	1.02881	1.64406	14.5911	0.000133544	0.0149157
chr2:135808618:135809525	264	264	282	125	46	135	0.784292	2.6253	14.5685	0.000135152	0.0150252
chr17:44789824:44790403	78	58	79	94	60	79	-0.801403	1.46521	14.5671	0.000135254	0.0150252
chr1:133650763:133651703	210	165	232	88	57	86	0.71105	2.23453	14.562	0.000135623	0.0150257
chr9:40629488:40630704	93	159	112	242	92	154	-1.04	2.40448	14.5493	0.00013654	0.0150479
chr9:43585586:43586641	848	1022	900	1033	615	1190	-0.674714	5.09164	14.5448	0.000136867	0.0150479
chr5:13547346:13548045	210	136	251	86	43	85	0.80723	2.16814	14.5394	0.000137257	0.0150479
chr1:166154451:166155628	155	115	90	163	183	125	-1.15789	2.42973	14.5391	0.000137283	0.0150479
chr9:27020683:27020906	168	163	176	150	162	230	-0.799374	2.70285	14.4934	0.000140648	0.0153758
chr11:4208124:4209416	434	350	523	530	249	545	-0.665358	3.97643	14.4813	0.000141561	0.0154347
chr16:50030521:50030973	86	36	78	89	61	83	-0.923048	1.41906	14.4755	0.000141995	0.0154411
chr14:32213985:32214539	129	34	134	27	14	31	1.3489	1.03802	14.4614	0.00014306	0.015496
chr2:133417304:133418141	214	179	280	96	49	109	0.74536	2.36308	14.4589	0.000143252	0.015496
chr6:87072008:87072471	88	80	81	133	100	71	-1.01745	1.80767	14.4384	0.00014482	0.0156247
chr8:113962995:113963429	128	81	144	50	22	49	0.876642	1.41561	14.4232	0.000145992	0.0156519
chr4:95409479:95410043	234	87	215	59	29	72	1.07335	1.92817	14.4221	0.000146078	0.0156519
chr17:31918980:31919596	115	79	105	101	74	145	-0.767524	1.91658	14.4204	0.000146212	0.0156519
chr6:117997730:117998310	85	137	60	116	93	203	-1.16207	2.12762	14.3807	0.000149325	0.0159367
chr8:96337079:96337688	388	175	391	122	79	104	0.929716	2.78057	14.371	0.000150097	0.0159367
chr8:122931674:122932441	89	141	151	157	85	221	-0.904031	2.36629	14.361	0.000150899	0.0159367
chr8:15011731:15012608	132	157	257	72	47	57	0.93352	2.01122	14.3601	0.000150967	0.0159367
chr15:53110789:53111476	277	160	175	87	45	80	0.865097	2.19805	14.3578	0.000151152	0.0159367
chr8:90261700:90262301	215	140	170	64	53	69	0.800972	2.00408	14.3573	0.000151193	0.0159367
chr10:91797916:91798245	154	103	89	55	16	37	1.04464	1.35809	14.3378	0.000152769	0.0160618
chr11:18847425:18848032	134	150	143	64	32	60	0.799996	1.72556	14.3306	0.000153354	0.0160823
chr13:99421123:99421693	125	99	115	123	71	171	-0.7521	2.09264	14.3104	0.000155008	0.0162145
chr19:5813472:5814394	99	96	162	115	129	159	-0.906954	2.24511	14.2989	0.000155954	0.0162721
chr10:66373934:66374852	496	525	585	544	340	679	-0.61251	4.25576	14.2905	0.000156655	0.016304
chr4:63231306:63231848	161	117	222	61	30	82	0.873081	1.8988	14.266	0.000158706	0.0164758
chr5:20776431:20776924	135	57	123	49	16	22	1.17355	1.17217	14.2474	0.000160282	0.0165977
chr4:9635676:9636207	251	125	153	66	33	76	0.940655	1.96644	14.2419	0.000160748	0.0166042
chr6:140610489:140611140	179	170	194	90	48	61	0.772236	2.06533	14.199	0.000164462	0.0169453
chr8:29486284:29487024	336	262	387	161	91	125	0.698984	2.92011	14.1854	0.000165652	0.0170254
chr8:10857018:10857593	85	62	67	96	44	100	-0.810717	1.46974	14.1775	0.000166352	0.0170548
chr1:164565140:164566517	702	653	755	625	570	863	-0.661241	4.67594	14.1709	0.000166935	0.0170721
chr2:22865333:22865544	110	59	110	101	69	139	-0.822828	1.84043	14.1537	0.000168469	0.017185
chr11:51631266:51631753	155	121	132	58	33	59	0.777952	1.66196	14.1492	0.000168873	0.017185
chr9:120646970:120647438	123	105	139	58	20	54	0.827104	1.4928	14.1415	0.000169564	0.0172128
chr18:80891545:80892200	134	89	153	164	82	150	-0.743433	2.22375	14.1351	0.00017014	0.0172289
chr1:102635387:102635595	74	69	66	57	72	127	-0.974537	1.53709	14.129	0.00017069	0.0172422
chr6:136917131:136917820	213	104	170	75	28	58	0.935552	1.84558	14.0942	0.000173877	0.0174886
chr18:38286463:38287519	718	704	675	768	423	873	-0.6155	4.64723	14.0904	0.000174226	0.0174886
chr16:26049354:26050235	245	158	324	83	62	108	0.827208	2.43544	14.0886	0.000174402	0.0174886
chr7:19618848:19619101	76	93	85	72	92	142	-0.96016	1.81133	14.0749	0.000175676	0.0175736
chr1:90984589:90985243	105	137	126	130	92	178	-0.77279	2.23532	14.0452	0.000178466	0.0178094
chr4:154223746:154224830	101	70	106	85	118	118	-0.970858	1.91606	14.0216	0.00018072	0.0179762
chr12:38744056:38744699	205	91	167	66	27	57	0.958957	1.76514	14.0186	0.00018101	0.0179762
chr8:23543332:23544049	328	205	349	149	58	110	0.814853	2.71687	14.0053	0.000182293	0.0180602
chr15:26764089:26764547	175	143	167	58	45	79	0.740009	1.91543	13.9526	0.000187483	0.0185252
chr1:184593621:184594165	163	81	159	65	23	38	1.00281	1.55914	13.9485	0.000187886	0.0185252
chr12:101537319:101537997	187	188	239	194	146	289	-0.700432	2.91583	13.9326	0.00018948	0.0186378
chr12:41527923:41528798	541	319	507	204	96	220	0.741152	3.36462	13.9137	0.000191394	0.0187687
chrX:158363861:158364750	132	139	186	68	41	56	0.788765	1.81464	13.9105	0.000191722	0.0187687
chr13:55296995:55298127	71	76	117	143	43	156	-0.979134	1.87509	13.8897	0.000193861	0.0189331
chr15:38405672:38408869	277	598	480	755	311	819	-1.06171	4.32171	13.8834	0.000194507	0.0189513
chr3:148989668:148990110	84	37	106	99	55	123	-0.960333	1.61962	13.8778	0.00019509	0.0189611
chr7:3280576:3281249	68	102	149	114	85	209	-1.00325	2.15961	13.8736	0.000195528	0.0189611
chr4:114360962:114361832	315	219	314	137	62	132	0.70111	2.70571	13.8519	0.000197792	0.0191356
chr7:74833098:74833720	203	152	150	70	44	72	0.77213	1.96468	13.8299	0.000200123	0.0192651
chr11:43198327:43199483	846	688	842	748	502	982	-0.572546	4.79045	13.8263	0.00020051	0.0192651
chr18:78184212:78184759	166	83	166	59	23	56	0.924983	1.62149	13.8223	0.000200937	0.0192651
chr12:25318551:25319549	596	698	612	619	470	884	-0.70377	4.56913	13.8217	0.000201	0.0192651
chr3:149384761:149385175	116	96	123	30	31	55	0.849018	1.3637	13.815	0.00020172	0.0192746
chr18:60820347:60821645	484	645	655	619	426	798	-0.700931	4.46787	13.8121	0.000202034	0.0192746
chr12:82798885:82799520	217	197	154	215	160	223	-0.752955	2.84863	13.7808	0.000205424	0.0195528
chr7:19862637:19863959	91	142	144	215	103	133	-0.919394	2.35923	13.7684	0.000206788	0.0196372
chr10:62523020:62523642	242	204	362	95	46	143	0.868792	2.57624	13.7542	0.000208351	0.0197402
chrX:76186967:76187498	81	40	70	60	67	96	-0.936584	1.36422	13.7309	0.000210959	0.0199414
chr6:88154405:88155831	322	337	359	342	241	385	-0.600849	3.59274	13.7212	0.000212048	0.0199985
chr17:46199996:46201408	706	845	791	844	507	989	-0.64113	4.82632	13.7167	0.000212552	0.0200003
chr11:74866465:74866943	78	68	60	116	41	87	-0.875646	1.46299	13.6836	0.00021634	0.0203103
chr8:23811653:23812277	205	169	217	236	105	294	-0.729426	2.87733	13.6074	0.000225301	0.0211035
chr13:73984770:73985209	225	138	209	83	49	81	0.744772	2.13488	13.5878	0.000227659	0.0212575
chr9:113204701:113205567	259	271	307	332	203	280	-0.640718	3.33156	13.5852	0.000227976	0.0212575
chr9:31073571:31073985	97	118	142	177	63	178	-0.842533	2.22852	13.5741	0.000229323	0.0212829
chr9:65400070:65400858	109	116	133	146	85	133	-0.692395	2.13854	13.5722	0.000229557	0.0212829
chr14:119686093:119686287	190	132	145	132	148	244	-0.862285	2.61814	13.5697	0.000229871	0.0212829
chr7:112877292:112878054	461	228	478	148	100	158	0.820447	3.10349	13.566	0.000230314	0.0212829
chr17:35406483:35407376	77	74	102	116	55	100	-0.759032	1.67406	13.5578	0.000231326	0.0213286
chr8:96710441:96711795	575	468	524	267	150	223	0.619426	3.61926	13.54	0.000233526	0.0214596
chr5:138274674:138275088	120	109	104	47	31	40	0.820908	1.37259	13.5379	0.000233789	0.0214596
chrX:70899524:70899887	156	102	116	40	31	60	0.842082	1.51847	13.5036	0.000238103	0.0218071
chr5:111392261:111394005	38	17	77	31	67	183	-1.78834	1.3888	13.4796	0.000241173	0.0220038
chr6:113611512:113612183	102	65	117	112	66	121	-0.749249	1.82399	13.4785	0.000241319	0.0220038
chr2:18687021:18687869	451	311	405	177	102	195	0.634582	3.18613	13.4486	0.000245187	0.0223013
chr19:24044865:24045339	133	80	136	50	29	42	0.840512	1.4133	13.445	0.000245663	0.0223013
chr15:31735234:31735798	191	148	173	92	29	65	0.820028	1.963	13.4401	0.000246307	0.0223105
chr16:33771550:33772489	74	100	52	112	56	116	-0.948174	1.66072	13.3953	0.000252259	0.0227515
chr13:102056911:102057867	143	105	147	42	34	67	0.790369	1.60639	13.3925	0.00025263	0.0227515
chr1:151680155:151680530	144	90	141	54	31	49	0.802899	1.52645	13.391	0.000252831	0.0227515
chr8:97307728:97308724	160	176	163	184	130	186	-0.678404	2.61533	13.377	0.000254732	0.0228726
chr13:41729821:41730204	156	74	129	48	25	47	0.902927	1.43092	13.3694	0.000255764	0.0229154
chr9:107598973:107599815	226	225	283	233	164	344	-0.67198	3.15653	13.3608	0.000256941	0.0229709
chr6:94611175:94611798	195	165	249	221	123	268	-0.662978	2.87443	13.3552	0.000257706	0.0229893
chr3:78996668:78997386	484	272	480	209	87	140	0.830712	3.18744	13.348	0.000258703	0.0230285
chrX:69994555:69995448	134	105	143	165	84	138	-0.686759	2.22066	13.3382	0.000260048	0.0230983
chr12:56567785:56568277	99	88	115	120	75	111	-0.697263	1.8924	13.3323	0.000260879	0.0231223
chr7:81673981:81674542	73	46	102	103	45	107	-0.863168	1.53021	13.3117	0.000263748	0.0233162
chr11:94948538:94949264	125	113	171	159	102	149	-0.689501	2.3182	13.3086	0.000264198	0.0233162
chr10:109544184:109545039	62	49	100	66	84	98	-0.976163	1.52293	13.3022	0.000265089	0.0233448
chr5:34252020:34252590	62	66	94	59	85	124	-0.987954	1.61741	13.2856	0.000267449	0.0234857
chr16:85298818:85299349	86	61	87	104	46	103	-0.764053	1.56293	13.283	0.000267829	0.0234857
chr2:90867516:90868387	302	160	606	105	65	122	1.16249	2.85353	13.2763	0.000268787	0.0235197
chr8:97519197:97519593	128	86	128	54	12	51	0.916434	1.36447	13.2711	0.000269527	0.0235345
chr15:27738346:27739301	230	83	285	79	17	59	1.30853	2.01188	13.2622	0.000270807	0.0235956
chr6:38110133:38110560	194	124	169	47	47	78	0.810295	1.89208	13.2583	0.000271371	0.0235956
chr15:102995864:102996294	160	124	180	64	44	67	0.722716	1.8531	13.2508	0.000272459	0.0236403
chr14:70489823:70491454	195	259	231	258	180	265	-0.707376	3.09355	13.2221	0.00027667	0.0238004
chr3:115864781:115865574	198	136	285	74	41	101	0.85226	2.20081	13.2218	0.000276717	0.0238004
chr9:50883769:50884287	89	90	93	119	54	117	-0.734843	1.77179	13.21	0.000278465	0.0238004
chr8:128974836:128975516	197	228	315	257	170	337	-0.708494	3.18807	13.205	0.000279201	0.0238004
chr17:22876289:22877186	428	454	494	446	303	562	-0.590767	4.02081	13.2048	0.000279232	0.0238004
chr11:70400396:70401067	182	195	171	202	131	216	-0.663675	2.74307	13.2041	0.000279337	0.0238004
chr14:70488099:70489708	98	131	212	171	103	259	-0.918115	2.56808	13.2033	0.000279459	0.0238004
chr7:29046115:29046518	98	66	122	110	69	120	-0.744573	1.83069	13.2031	0.00027948	0.0238004
chr19:5815889:5816429	62	75	66	104	36	101	-0.862705	1.43916	13.2026	0.000279559	0.0238004
chr12:12407815:12408751	281	228	272	128	65	124	0.641897	2.61776	13.1991	0.000280079	0.0238004
chr18:75947810:75948457	81	69	71	103	36	124	-0.862145	1.55391	13.1904	0.000281384	0.0238621
chr4:31281266:31281494	224	230	188	190	209	306	-0.828839	3.07164	13.1743	0.000283818	0.0240191
chr4:125181260:125181761	173	114	201	142	153	228	-0.818726	2.63956	13.1666	0.000284986	0.0240366
chr6:91687990:91688560	68	77	115	92	55	210	-1.06694	1.91088	13.1652	0.000285192	0.0240366
chr4:120286184:120286767	288	192	301	121	66	118	0.682253	2.59382	13.1559	0.000286613	0.0241071
chr2:22870031:22870665	543	400	544	481	339	546	-0.563267	4.10452	13.1476	0.000287895	0.0241656
chr8:129371774:129372314	91	87	126	139	67	114	-0.738443	1.92328	13.1134	0.000293191	0.0245601
chrX:68340576:68341578	489	340	461	192	134	193	0.621618	3.33367	13.1065	0.000294273	0.0246007
chr7:106814247:106815064	333	376	413	384	229	569	-0.70539	3.79621	13.1006	0.000295207	0.0246288
chr8:87293093:87293607	182	202	232	102	54	78	0.727424	2.25856	13.0926	0.000296466	0.024675
chr10:79898407:79898929	100	88	103	119	59	123	-0.700263	1.84324	13.0895	0.000296957	0.024675
chr4:94823441:94824005	84	86	140	108	68	191	-0.884883	2.03908	13.0838	0.000297863	0.0247005
chr10:77549173:77549746	110	112	100	131	89	114	-0.732254	2.01619	13.0797	0.000298514	0.0247047
chr2:4482214:4482837	171	120	169	65	48	54	0.761373	1.82933	13.074	0.000299421	0.0247301
chr15:76395692:76396661	116	90	77	119	122	93	-0.98708	1.97245	13.0696	0.000300128	0.0247389
chr5:65845834:65846520	304	300	252	333	197	325	-0.654209	3.3814	13.0635	0.000301106	0.02477
chr7:85936338:85936794	155	110	166	68	31	62	0.754873	1.73571	13.0512	0.000303097	0.0248842
chr1:94334198:94335101	248	164	231	99	53	98	0.69351	2.31871	13.0468	0.000303806	0.0248928
chr4:107110696:107111311	81	38	93	89	44	125	-0.934388	1.51273	13.0357	0.000305603	0.0249903
chrX:139134598:139135803	287	173	313	119	51	117	0.770971	2.54321	13.0306	0.000306442	0.0250093
chr1:90458930:90459305	151	158	185	76	40	75	0.710842	1.95183	13.0166	0.000308738	0.0251469
chr12:113577784:113578431	283	272	316	389	155	362	-0.683226	3.41329	13.0054	0.000310597	0.0252484
chr11:96261206:96261611	101	82	67	92	56	139	-0.83415	1.71549	12.9858	0.000313865	0.0254638
chr16:63312340:63312542	72	62	72	54	69	117	-0.911213	1.47147	12.9769	0.000315359	0.0255348
chr8:27990581:27991024	122	87	185	37	37	54	0.909939	1.5545	12.9723	0.000316142	0.025548
chr4:15160912:15161554	208	186	337	102	69	88	0.791633	2.46073	12.9549	0.00031909	0.0257358
chr10:53746402:53746906	154	160	158	168	120	176	-0.651857	2.51702	12.9479	0.000320285	0.0257817
chr7:29378500:29379131	60	70	104	114	38	153	-0.983012	1.70759	12.9372	0.000322109	0.025878
chr13:29790314:29790835	161	100	161	34	50	48	0.930843	1.65044	12.9316	0.000323086	0.025906
chr8:109298068:109299109	432	173	316	133	49	117	0.973045	2.72323	12.9246	0.000324291	0.0259521
chr19:40546209:40546864	245	192	263	99	62	120	0.647919	2.45682	12.911	0.000326664	0.0260298
chr17:86836618:86837203	170	89	156	64	31	48	0.854146	1.6469	12.908	0.000327185	0.0260298
chr11:99876581:99877169	109	125	234	66	25	61	0.969265	1.78097	12.9055	0.000327618	0.0260298
chr17:74291164:74292335	897	583	857	371	218	375	0.600827	4.1856	12.9045	0.000327788	0.0260298
chr2:171754732:171755216	62	57	82	52	77	109	-0.962522	1.45807	12.8949	0.000329479	0.0261137
chr10:98710207:98710880	151	173	148	205	117	167	-0.71389	2.55932	12.8827	0.000331637	0.0262343
chr1:192262357:192263188	184	117	374	74	28	91	1.15383	2.22084	12.8572	0.000336176	0.0265424
chr12:112963684:112964761	287	217	298	252	186	322	-0.603075	3.23795	12.8454	0.000338318	0.0266251
chr5:148422942:148423306	473	395	557	369	432	768	-0.839392	4.20983	12.8429	0.000338758	0.0266251
chr4:105118024:105119153	551	357	588	260	119	190	0.720648	3.50018	12.8407	0.000339161	0.0266251
chr14:67901785:67902310	77	70	69	86	59	82	-0.748348	1.45012	12.8337	0.000340439	0.0266294
chr1:90114608:90119443	68	178	157	211	85	399	-1.33232	2.7584	12.8333	0.000340507	0.0266294
chr7:35414815:35416107	725	753	511	761	486	891	-0.745361	4.66343	12.8292	0.00034125	0.0266369
chrX:68070704:68071361	289	210	288	140	63	100	0.708854	2.6001	12.819	0.000343114	0.0266976
chr1:136667503:136668444	470	411	493	256	110	162	0.718678	3.39367	12.8159	0.000343685	0.0266976
chr4:78158941:78159522	109	88	107	86	84	159	-0.790996	1.95733	12.8144	0.000343971	0.0266976
chr19:47582971:47583817	381	590	376	570	364	604	-0.830814	4.1638	12.803	0.000346055	0.0268088
chr4:134103700:134104657	566	585	637	760	339	675	-0.624221	4.41855	12.7922	0.000348073	0.0269006
chr7:52894016:52894408	125	92	128	53	21	53	0.786306	1.41777	12.7896	0.000348545	0.0269006
chr18:75638101:75639222	730	890	859	892	530	1004	-0.614021	4.89113	12.7851	0.000349396	0.0269075
chr5:106227255:106227780	133	148	129	206	90	149	-0.760825	2.38458	12.7792	0.000350499	0.0269075
chr2:101671752:101673072	1531	806	1486	607	286	540	0.747441	4.8262	12.7781	0.000350693	0.0269075
chr3:126398128:126398950	777	572	775	360	206	332	0.566105	4.06646	12.7746	0.000351359	0.0269075
chr16:33779008:33779895	53	96	61	92	54	111	-0.91841	1.53439	12.7717	0.000351898	0.0269075
chr11:53634806:53635606	403	427	485	486	242	742	-0.768334	4.06321	12.76	0.000354119	0.0269423
chr2:181205685:181206382	292	191	311	239	210	345	-0.700307	3.27348	12.7586	0.000354368	0.0269423
chr5:34030594:34033490	3497	3293	3814	3283	2250	3836	-0.493413	6.90611	12.7578	0.000354534	0.0269423
chr16:33781554:33783295	97	250	114	244	159	269	-1.16105	2.84827	12.7525	0.000355527	0.0269423
chr7:117358268:117359004	233	159	212	94	39	100	0.728268	2.21953	12.752	0.000355622	0.0269423
chr3:97051451:97052230	65	66	56	49	69	110	-0.975755	1.38029	12.7474	0.0003565	0.0269592
chr14:55622625:55623120	227	126	249	77	49	91	0.786464	2.18436	12.7365	0.000358588	0.0270675
chr3:30181279:30182038	165	141	208	67	48	82	0.703343	2.00251	12.7215	0.000361482	0.0271956
chr7:152157214:152157641	69	66	56	91	32	106	-0.871186	1.35685	12.7208	0.000361605	0.0271956
chr4:141515347:141515853	83	74	102	148	56	89	-0.833838	1.75281	12.6991	0.00036583	0.0274633
chr12:112743151:112743601	150	94	170	54	24	70	0.828924	1.65035	12.6898	0.000367651	0.0275498
chr12:22407200:22408035	54	42	54	37	54	93	-0.989238	1.06218	12.6758	0.00037041	0.0276766
chr13:102482795:102483610	299	158	281	100	73	84	0.803826	2.46776	12.6744	0.000370687	0.0276766
chr10:79399046:79400535	1677	1895	2032	1935	1164	2139	-0.555692	6.02811	12.6598	0.000373599	0.0278436
chr12:73562512:73563181	157	85	185	66	28	50	0.888753	1.67025	12.6529	0.000374989	0.0278967
chr10:31311807:31312917	320	202	235	134	44	93	0.84376	2.50352	12.6297	0.000379671	0.0281695
chr4:134849657:134850277	221	315	191	284	189	374	-0.848191	3.28296	12.6279	0.000380022	0.0281695
chr1:173942202:173942557	155	92	143	50	31	61	0.782654	1.58657	12.606	0.000384511	0.0284511
chr10:18728879:18729580	270	288	290	367	145	429	-0.752215	3.42478	12.6004	0.000385656	0.0284846
chr9:87738698:87739148	181	103	169	62	27	75	0.812576	1.78283	12.5949	0.000386803	0.0285182
chr10:129172452:129172648	165	134	126	120	156	196	-0.874056	2.49258	12.5548	0.000395187	0.0290443
chr18:34002226:34002739	144	140	137	67	31	63	0.736148	1.72359	12.5519	0.00039581	0.0290443
chr17:87166076:87166707	157	121	148	79	28	46	0.819372	1.70568	12.5507	0.000396053	0.0290443
chr1:186297172:186298661	56	29	67	37	56	117	-1.16566	1.17504	12.5394	0.000398468	0.0291695
chr2:68274043:68274674	127	139	136	56	36	60	0.738794	1.66101	12.5324	0.000399953	0.0292263
chr12:82791718:82792797	854	849	744	821	539	1012	-0.605333	4.86759	12.5291	0.000400665	0.0292266
chr2:158514753:158515192	99	117	91	142	67	125	-0.759605	1.97111	12.523	0.000401983	0.0292709
chr12:81205840:81206638	51	97	66	104	56	98	-0.905154	1.55106	12.5094	0.00040492	0.0294328
chr4:88775199:88775666	167	107	185	68	40	61	0.75443	1.82072	12.4928	0.000408522	0.0296227
chrX:93612368:93613216	132	123	226	61	46	59	0.828988	1.86205	12.4907	0.000408986	0.0296227
chr7:127104585:127105040	127	85	134	52	28	46	0.778868	1.42244	12.4875	0.000409689	0.0296227
chr1:153557521:153558421	487	324	498	208	100	221	0.65225	3.33689	12.4765	0.000412113	0.0297458
chr6:56183580:56183796	286	246	236	207	254	376	-0.83075	3.32362	12.4409	0.000420029	0.0302641
chr5:39025178:39026434	764	701	751	367	216	387	0.532959	4.15094	12.4326	0.000421909	0.0303465
chr11:20933740:20934429	229	277	327	345	152	405	-0.732678	3.38183	12.424	0.000423843	0.0304305
chr2:150557396:150558352	58	52	83	52	69	101	-0.914808	1.36992	12.4209	0.000424554	0.0304305
chr15:38421570:38422641	120	100	140	137	87	129	-0.653415	2.1163	12.3933	0.000430867	0.0308294
chr7:134878949:134879600	77	73	86	61	89	119	-0.907517	1.6605	12.3702	0.000436246	0.0311602
chr19:4135565:4136243	86	78	82	101	50	106	-0.71183	1.61282	12.3647	0.000437537	0.0311983
chr6:115937139:115937806	138	120	137	172	77	151	-0.666603	2.2629	12.3481	0.000441443	0.0314171
chr3:21468548:21469189	236	129	185	95	38	42	0.969273	2.00931	12.3433	0.000442573	0.0314171
chr16:90743664:90744300	147	80	167	60	24	52	0.864944	1.5669	12.34	0.00044336	0.0314171
chr1:154413719:154414207	115	103	117	154	59	143	-0.719921	2.05915	12.3387	0.000443654	0.0314171
chr9:120307331:120308013	241	77	263	78	33	48	1.16691	2.00603	12.3193	0.00044831	0.0316924
chr2:135809551:135810158	315	213	404	159	71	106	0.790075	2.8003	12.3121	0.000450037	0.03176
chr13:25146947:25147429	163	126	163	53	50	66	0.722874	1.82091	12.3003	0.000452886	0.0319064
chr13:60777885:60778097	143	105	82	96	117	178	-0.941617	2.17397	12.2861	0.000456352	0.0320502
chr15:51626817:51627760	466	388	481	248	108	187	0.642351	3.37831	12.2855	0.000456483	0.0320502
chr19:6018002:6018450	175	132	176	72	35	82	0.697507	1.91713	12.2721	0.000459785	0.0321581
chr19:34352428:34353051	285	182	266	125	47	109	0.735559	2.48692	12.27	0.000460296	0.0321581
chr10:4737188:4738464	162	161	160	176	102	195	-0.622685	2.53195	12.2669	0.000461075	0.0321581
chr7:137492242:137492771	99	64	85	55	106	162	-1.11035	1.84878	12.2666	0.000461141	0.0321581
chr2:121347992:121348640	324	283	308	225	338	484	-0.919582	3.62795	12.263	0.000462024	0.0321653
chr17:37064499:37065003	237	184	183	94	49	94	0.694442	2.24161	12.2539	0.000464278	0.0322223
chr13:96489648:96490181	224	197	243	113	50	106	0.652202	2.38397	12.2534	0.000464406	0.0322223
chr8:73956915:73957125	162	156	148	118	169	250	-0.913932	2.65351	12.2391	0.000467984	0.0324074
chr18:75438066:75439126	348	514	439	556	274	581	-0.73746	4.04375	12.2365	0.000468647	0.0324074
chr11:88369309:88370042	231	122	202	83	36	84	0.792208	2.07266	12.2331	0.000469502	0.0324121
chr13:116532382:116532596	144	111	130	110	126	164	-0.771015	2.28282	12.2167	0.000473641	0.0326393
chr5:106146878:106147859	508	495	656	748	306	628	-0.657331	4.32236	12.2111	0.000475072	0.0326393
chr19:32606659:32607199	133	68	146	55	26	27	0.980098	1.35699	12.2107	0.000475167	0.0326393
chr5:97451128:97452112	436	239	337	168	69	141	0.767585	2.93199	12.1997	0.000477959	0.0327764
chr6:90420920:90421618	156	36	175	34	23	31	1.3231	1.32623	12.1966	0.000478772	0.0327776
chr16:34861896:34862554	299	168	283	128	33	97	0.912208	2.45789	12.1871	0.000481201	0.0328893
chr12:83516589:83517228	281	208	241	128	58	103	0.678536	2.50948	12.1786	0.000483417	0.032986
chr14:70482127:70488070	850	752	1116	849	593	1078	-0.568288	4.97553	12.1741	0.000484571	0.0330101
chr1:136687364:136687935	137	144	131	66	34	56	0.743629	1.69492	12.1547	0.000489638	0.0333002
chr16:5709193:5709391	182	124	150	115	162	244	-0.911061	2.6084	12.1448	0.000492248	0.0333696
chr1:54740449:54741828	1456	1120	1369	645	382	720	0.513606	4.97908	12.1447	0.000492278	0.0333696
chr3:79086881:79087499	191	215	167	82	48	89	0.740689	2.16447	12.1355	0.000494698	0.0334786
chr17:29237377:29239598	200	140	245	177	138	301	-0.746678	2.8604	12.1216	0.000498413	0.0336223
chr10:83798088:83798646	263	195	252	108	63	119	0.624865	2.48628	12.1214	0.000498452	0.0336223
chr13:59568705:59569485	390	183	334	143	61	118	0.827147	2.74871	12.1104	0.000501425	0.0337398
chr1:19166287:19166474	128	106	104	84	126	187	-0.943993	2.20427	12.1075	0.000502192	0.0337398
chr17:15729740:15730211	254	175	285	209	198	302	-0.699314	3.1198	12.1058	0.00050265	0.0337398
chr2:19265759:19266528	214	146	188	82	41	92	0.693199	2.09611	12.0852	0.00050823	0.0340589
chr13:19822608:19823037	127	95	199	37	32	71	0.904799	1.64787	12.0764	0.000510655	0.0341658
chr16:93778417:93778951	169	98	86	124	106	169	-0.861035	2.21736	12.0665	0.00051337	0.0342918
chr11:69217238:69218522	157	166	140	177	90	228	-0.718149	2.53521	12.0412	0.00052038	0.0346574
chr14:42234606:42235749	570	440	635	537	320	747	-0.613061	4.27771	12.0379	0.000521294	0.0346574
chr17:81893506:81894527	571	519	610	593	340	593	-0.506754	4.27182	12.0376	0.000521367	0.0346574
chr11:74656373:74657610	246	365	276	320	221	419	-0.754477	3.50461	12.0321	0.000522928	0.0347052
chr7:124715191:124715732	133	118	180	53	43	65	0.730962	1.74696	12.0114	0.000528758	0.0350113
chr12:103549520:103550100	217	140	355	94	34	106	0.95935	2.35842	12.0083	0.000529639	0.0350113
chr10:80221167:80221942	211	177	175	256	121	194	-0.675519	2.78239	12.0067	0.000530089	0.0350113
chr5:152484536:152484997	85	54	96	61	104	114	-1.01376	1.6975	11.9959	0.000533182	0.0351593
chr11:4199670:4200321	179	159	237	256	116	206	-0.667367	2.79537	11.9876	0.000535548	0.0352589
chr11:30529462:30529886	118	100	130	49	40	30	0.832602	1.42235	11.9621	0.000542942	0.035637
chr16:43489168:43490096	595	437	544	239	144	288	0.571125	3.64031	11.9618	0.000543027	0.035637
chr7:82784299:82784896	139	125	175	64	42	63	0.695885	1.78663	11.9527	0.000545685	0.035637
chr4:140918995:140919425	125	111	143	58	31	57	0.709323	1.57794	11.9515	0.000546031	0.035637
chr5:147478120:147478339	156	146	143	114	144	239	-0.851986	2.54881	11.9462	0.0005476	0.035637
chr9:71931566:71932422	291	240	264	138	75	104	0.652737	2.64309	11.9424	0.000548699	0.035637
chr4:124449215:124450082	631	674	703	341	192	331	0.560049	4.0023	11.942	0.000548813	0.035637
chr1:36090597:36091410	80	45	107	70	72	122	-0.895019	1.60999	11.9387	0.000549784	0.035637
chr7:150293986:150294589	120	126	154	65	30	58	0.727995	1.64939	11.9366	0.000550406	0.035637
chr4:41512854:41513407	85	98	92	132	57	105	-0.739156	1.79501	11.9335	0.000551326	0.035637
chr15:38231442:38232518	940	991	999	1081	609	1013	-0.540486	5.08481	11.9332	0.000551436	0.035637
chr13:13441632:13441969	117	63	134	36	20	51	0.881434	1.24826	11.931	0.000552065	0.035637
chr5:151270859:151271501	519	255	449	174	104	178	0.737057	3.20392	11.9273	0.000553185	0.035637
chr3:87714140:87715200	950	664	864	413	241	409	0.548639	4.29475	11.9265	0.000553396	0.035637
chr13:112916251:112916689	71	98	73	91	54	130	-0.811433	1.66485	11.9153	0.000556744	0.0357967
chr4:137020844:137021849	774	817	918	872	476	1047	-0.570303	4.87428	11.9108	0.00055809	0.0358273
chr8:15018068:15018908	230	122	273	77	54	89	0.805826	2.22683	11.9046	0.000559959	0.0358914
chr4:43444423:43444996	328	233	318	134	83	146	0.601777	2.79521	11.8841	0.000566138	0.0362311
chr1:23274950:23275266	82	45	81	85	47	89	-0.758794	1.38549	11.8667	0.000571481	0.0365163
chr17:46220953:46221596	237	283	347	298	172	530	-0.81968	3.49281	11.8635	0.000572457	0.036519
chr6:115188444:115189280	690	463	706	307	166	305	0.58704	3.86244	11.8567	0.000574558	0.036519
chr7:105690873:105691777	988	1066	1113	1240	604	1180	-0.571107	5.21413	11.8562	0.000574709	0.036519
chr9:61141329:61141969	275	175	247	108	68	95	0.673661	2.44006	11.855	0.000575068	0.036519
chr5:139364713:139366062	226	233	290	213	181	390	-0.726808	3.21957	11.8507	0.000576387	0.0365465
chr4:150272759:150273154	135	90	143	46	30	61	0.751189	1.51612	11.8437	0.000578556	0.0366276
chr11:50026157:50027307	1413	1137	1534	1222	973	1449	-0.535533	5.54647	11.8382	0.00058028	0.0366804
chr13:109257176:109257751	195	120	186	71	53	58	0.751678	1.94759	11.8197	0.000586077	0.0369901
chr16:91056142:91057189	549	438	413	245	123	187	0.674622	3.44314	11.8036	0.000591156	0.0372296
chr2:117868098:117868834	360	232	374	156	68	159	0.682671	2.8926	11.802	0.000591678	0.0372296
chr8:95241219:95241819	123	115	129	141	67	168	-0.670907	2.16135	11.7958	0.000593661	0.037256
chr10:18595628:18596556	664	348	707	271	123	245	0.759821	3.67585	11.7909	0.000595215	0.037256
chr3:103059903:103060576	532	419	460	171	78	282	0.807173	3.40275	11.7906	0.000595307	0.037256
chr11:101947060:101947504	101	81	112	112	60	123	-0.664169	1.83206	11.7884	0.00059602	0.037256
chr10:44823846:44824774	279	197	266	100	60	138	0.658214	2.53442	11.7865	0.000596617	0.037256
chrX:71782354:71782920	68	29	65	42	70	92	-1.08147	1.20241	11.7759	0.000600015	0.0374115
chr5:140733220:140733660	97	108	105	153	57	126	-0.744349	1.96995	11.7572	0.000606093	0.0377334
chr7:29041256:29041626	107	54	116	89	70	149	-0.833241	1.83199	11.7482	0.00060902	0.0378155
chr10:17447407:17448002	137	138	166	65	45	60	0.692948	1.79999	11.7475	0.000609247	0.0378155
chr2:102691834:102692484	187	135	119	67	42	35	0.915424	1.73229	11.7426	0.000610864	0.0378339
chr1:157140589:157140954	135	94	181	55	36	58	0.76995	1.65583	11.741	0.000611379	0.0378339
chr2:152757053:152757920	376	290	427	376	208	457	-0.5833	3.66983	11.6867	0.000629488	0.0388119
chr8:86749542:86750374	57	111	107	125	89	103	-0.891095	1.88671	11.6857	0.000629833	0.0388119
chr3:95488498:95489094	98	114	71	123	63	133	-0.799111	1.88491	11.6852	0.000630008	0.0388119
chr3:119553750:119554148	69	93	75	110	49	102	-0.771348	1.60761	11.6725	0.000634291	0.0390174
chr1:133007363:133007884	110	96	124	106	69	168	-0.705285	2.0246	11.6619	0.00063793	0.0391828
chr9:63553736:63554871	852	760	891	926	455	936	-0.530817	4.84361	11.6411	0.000645118	0.0394346
chr1:52478372:52478909	68	43	129	115	55	117	-0.93126	1.67997	11.6406	0.000645284	0.0394346
chr7:86572534:86573412	186	140	185	72	44	88	0.657879	2.01099	11.6395	0.000645666	0.0394346
chr8:89324862:89325286	129	124	168	75	30	54	0.744532	1.71179	11.637	0.000646531	0.0394346
chr9:85033214:85033941	249	145	276	98	59	95	0.720407	2.35824	11.6362	0.000646814	0.0394346
chr14:12489761:12490291	158	64	207	40	14	68	1.17819	1.58805	11.631	0.000648623	0.0394865
chr6:117986088:117987132	142	211	180	186	124	270	-0.755986	2.76543	11.6275	0.000649848	0.0395027
chr1:16101745:16102311	248	173	231	111	60	85	0.668708	2.34977	11.6126	0.000655065	0.0397612
chr17:79938049:79938569	145	207	171	182	115	298	-0.802634	2.76889	11.6002	0.000659442	0.0399673
chr8:96716447:96717175	396	268	297	168	44	135	0.863558	2.83713	11.5975	0.0006604	0.0399673
chr9:78320670:78322013	144	146	143	151	89	191	-0.6388	2.385	11.5911	0.000662669	0.0400458
chr13:67992755:67993283	107	60	85	87	88	92	-0.813505	1.69028	11.5782	0.000667299	0.0401911
chr4:136853569:136854080	141	107	132	134	92	139	-0.622991	2.1792	11.5765	0.000667889	0.0401911
chr1:92415035:92416351	763	919	815	797	572	1101	-0.633371	4.91648	11.5762	0.000667998	0.0401911
chr18:57805872:57806854	440	451	482	499	267	509	-0.541309	3.98866	11.5718	0.000669596	0.0402285
chr19:21858573:21859173	157	138	178	74	41	74	0.655958	1.90544	11.5648	0.000672112	0.0403208
chr2:90337581:90338400	131	113	120	123	81	153	-0.633697	2.12842	11.5612	0.00067344	0.0403418
chr2:30481393:30481990	306	286	330	381	154	416	-0.661486	3.4827	11.5491	0.000677813	0.0404537
chr10:77592230:77593201	282	333	380	322	213	452	-0.637266	3.58032	11.5471	0.000678537	0.0404537
chr13:43372867:43373213	71	38	58	47	52	91	-0.878024	1.14394	11.5438	0.000679738	0.0404537
chr2:132342031:132342547	150	85	150	41	33	64	0.795428	1.56152	11.5403	0.000681054	0.0404537
chr15:55137840:55138452	207	131	181	90	38	70	0.727234	2.00636	11.5378	0.000681955	0.0404537
chr10:67741321:67742027	147	142	166	76	38	66	0.674983	1.84819	11.5378	0.000681968	0.0404537
chr15:55361712:55362312	303	274	283	136	81	145	0.587705	2.78059	11.5372	0.00068218	0.0404537
chr2:30923628:30924715	664	441	669	297	174	257	0.597179	3.79233	11.5324	0.000683922	0.0404988
chr13:56819954:56820277	46	31	82	40	68	99	-1.12567	1.20052	11.5253	0.000686566	0.040597
chr11:4160135:4161022	478	475	516	454	306	621	-0.564218	4.09878	11.5207	0.000688271	0.0406395
chr3:144277312:144278188	247	149	211	80	68	73	0.740377	2.22243	11.5118	0.000691554	0.0407081
chr19:4293735:4294974	679	680	814	739	406	918	-0.563977	4.65992	11.5116	0.000691619	0.0407081
chr4:71447238:71448090	104	85	118	83	110	133	-0.819056	1.97897	11.507	0.000693334	0.0407081
chr1:24126978:24127438	139	114	112	50	32	57	0.727697	1.52649	11.5069	0.000693382	0.0407081
chr7:35355046:35356582	772	720	689	696	500	800	-0.544914	4.66155	11.4989	0.000696373	0.0408199
chr19:57732091:57733175	260	265	294	330	155	305	-0.591386	3.27144	11.4965	0.000697267	0.0408199
chr9:22266299:22266751	165	132	104	60	39	33	0.908421	1.60614	11.4844	0.000701836	0.041029
chr1:165210360:165211126	191	160	140	73	44	72	0.714456	1.94885	11.4724	0.00070636	0.0411658
chr17:17746480:17747013	273	118	208	82	31	93	0.897833	2.14415	11.4714	0.000706751	0.0411658
chr18:80711663:80712332	51	41	96	49	83	104	-1.08728	1.41637	11.468	0.00070806	0.0411658
chr17:34849857:34850262	206	151	179	75	49	90	0.655254	2.08229	11.4677	0.000708171	0.0411658
chr13:50079775:50080379	83	54	96	63	105	102	-0.989223	1.66833	11.4533	0.000713661	0.0414265
chr8:81108427:81109401	555	451	699	287	169	249	0.586964	3.74059	11.4482	0.000715615	0.0414624
chr11:59731499:59731905	78	58	80	85	37	116	-0.772036	1.45683	11.444	0.000717239	0.0414624
chr11:51459904:51461207	498	447	575	584	258	697	-0.639329	4.1858	11.4439	0.000717297	0.0414624
chr5:93718592:93718795	190	195	184	152	174	275	-0.770643	2.85691	11.4329	0.000721564	0.0416506
chr6:38481171:38481766	143	124	190	70	37	71	0.691229	1.83983	11.4179	0.000727387	0.041928
chr3:115416863:115418775	1850	1781	1854	1730	1180	1920	-0.487984	5.9564	11.3994	0.000734693	0.04229
chr6:67961823:67962038	54	72	43	40	80	114	-1.17189	1.36474	11.3938	0.000736905	0.0423581
chr16:45801540:45802221	259	144	295	94	57	109	0.7412	2.40603	11.3853	0.000740283	0.0424931
chr11:8129280:8130343	803	470	910	365	147	320	0.737904	4.02674	11.3719	0.000745646	0.0427156
chr8:106645166:106646462	2370	2617	2483	2584	1550	2738	-0.531202	6.43306	11.3691	0.000746766	0.0427156
chr12:109477548:109478122	216	143	207	90	55	75	0.674822	2.14639	11.3667	0.000747739	0.0427156
chr7:150655754:150656148	123	100	167	60	31	56	0.733217	1.60223	11.3653	0.000748306	0.0427156
chr4:102937574:102938253	194	179	219	195	144	209	-0.575169	2.79088	11.3623	0.000749491	0.0427241
chr8:87903205:87903718	112	124	130	62	19	57	0.777185	1.51405	11.3508	0.000754171	0.0429315
chr18:34539250:34540051	572	395	528	251	154	181	0.650839	3.53283	11.3434	0.000757158	0.0429918
chr13:104501348:104501994	374	243	361	158	95	143	0.618488	2.93727	11.343	0.000757316	0.0429918
chrX:73254910:73255481	192	119	209	82	25	84	0.809542	1.97549	11.305	0.000772999	0.0438217
chr2:68966844:68967342	162	78	167	48	28	66	0.844706	1.61729	11.3024	0.000774087	0.0438231
chr6:113536479:113537115	283	200	279	295	146	283	-0.58424	3.15182	11.2793	0.000783756	0.0442367
chr3:30828675:30829055	48	78	65	83	61	68	-0.833695	1.33213	11.2758	0.00078525	0.0442367
chr11:97669111:97669744	224	186	238	88	60	118	0.617043	2.36172	11.2738	0.000786098	0.0442367
chr6:55606993:55607472	75	68	79	60	79	99	-0.816308	1.51998	11.2729	0.000786452	0.0442367
chr5:23103997:23104832	366	305	418	196	100	157	0.593617	3.10355	11.2722	0.00078676	0.0442367
chr8:90386853:90387712	275	276	360	309	179	377	-0.57763	3.41083	11.2689	0.000788162	0.0442552
chr11:54787019:54787734	242	258	253	269	143	334	-0.617903	3.17114	11.2553	0.000793972	0.0444646
chr9:107528850:107529634	273	300	358	350	188	341	-0.572857	3.44362	11.2551	0.000794048	0.0444646
chr11:101221851:101222349	171	68	134	60	20	40	0.969911	1.46121	11.2443	0.00079866	0.0446342
chr12:99816042:99816512	105	157	133	168	90	159	-0.721342	2.31176	11.2414	0.000799909	0.0446342
chr3:146929362:146930121	415	277	360	171	85	180	0.616256	3.04479	11.2405	0.000800328	0.0446342
chr3:75334133:75335244	366	281	354	162	90	176	0.564572	2.99607	11.2296	0.000805013	0.044798
chr6:93264239:93265044	132	102	209	65	33	62	0.790481	1.75473	11.2287	0.000805438	0.044798
chr13:74543781:74544325	176	122	189	136	156	201	-0.747631	2.59709	11.2151	0.000811356	0.0450432
chr11:8108991:8109479	215	71	149	70	16	38	1.16449	1.61975	11.2117	0.00081284	0.0450432
chr16:11017804:11018577	175	261	203	279	153	244	-0.726294	3.0122	11.211	0.000813125	0.0450432
chr8:32977170:32977755	246	200	360	118	59	137	0.700461	2.62829	11.1971	0.000819267	0.0452708
chr18:39240929:39241429	116	103	83	133	72	109	-0.715848	1.91592	11.1967	0.000819431	0.0452708
chr19:60967026:60967441	88	94	79	97	55	121	-0.705842	1.70239	11.1805	0.000826614	0.0456065
chr18:5217104:5217692	56	108	80	89	66	132	-0.872839	1.71752	11.1769	0.000828219	0.045634
chr2:129214955:129215461	144	174	184	138	139	254	-0.75522	2.66603	11.1694	0.000831581	0.045758
chr5:91331973:91333182	307	379	369	416	206	423	-0.619493	3.66111	11.1642	0.000833918	0.0458255
chr6:134743951:134744666	288	192	270	86	58	147	0.710957	2.52974	11.1448	0.00084269	0.0462458
chr2:85086673:85087073	152	86	170	43	38	64	0.794024	1.63977	11.1181	0.000854885	0.0468447
chr15:63458386:63458565	70	70	74	51	92	108	-0.968729	1.55532	11.116	0.000855875	0.0468447
chr7:144607717:144608251	141	131	131	139	101	146	-0.616811	2.26784	11.109	0.000859078	0.0469215
chr5:111914966:111915468	224	212	195	98	63	93	0.643416	2.32725	11.1063	0.000860333	0.0469215
chr1:61826341:61826821	157	104	169	70	41	47	0.747402	1.73431	11.1033	0.000861749	0.0469215
chr2:63662416:63662930	163	137	192	82	50	51	0.728473	1.93476	11.1031	0.000861833	0.0469215
chr17:45511063:45511467	146	82	145	55	22	60	0.788131	1.51861	11.0993	0.000863621	0.0469568
chr18:62040059:62042053	846	756	834	829	455	918	-0.500955	4.78933	11.0849	0.000870337	0.0472596
chr2:26464109:26465338	91	131	133	110	102	161	-0.750985	2.1668	11.0768	0.000874145	0.047404
chr7:125618676:125619295	143	155	185	193	94	186	-0.61882	2.52505	11.0726	0.000876121	0.0474487
chr8:111283412:111284073	179	103	153	69	41	48	0.765138	1.74585	11.0693	0.000877701	0.0474719
chr13:3664517:3665081	255	139	236	73	60	102	0.728383	2.27205	11.0612	0.000881536	0.0475584
chr16:76786615:76787020	160	113	161	64	24	79	0.738493	1.75147	11.0602	0.000881992	0.0475584
chr1:169567115:169567493	125	104	134	52	37	51	0.690802	1.52573	11.0571	0.000883473	0.0475584
chr3:152227188:152227956	193	147	209	99	45	72	0.675704	2.10368	11.0562	0.000883917	0.0475584
chr8:127577807:127578791	184	156	177	198	108	181	-0.57767	2.59821	11.0303	0.000896368	0.0481655
chr4:45496568:45497153	175	146	140	74	41	66	0.684723	1.86786	11.0226	0.000900064	0.0483011
chr7:89627802:89628252	186	170	207	226	116	191	-0.584564	2.72336	11.0164	0.000903088	0.0484003
chr16:97732902:97733457	170	112	213	62	49	73	0.726748	1.93299	11.0136	0.00090447	0.0484115
chr11:69842305:69843384	283	270	308	287	196	294	-0.531443	3.30763	11.0024	0.000909946	0.0486414
chr7:119465727:119466256	96	41	72	82	53	90	-0.789508	1.40844	10.9988	0.000911731	0.0486737
chr8:64155972:64156562	117	83	148	40	31	57	0.758004	1.43435	10.9859	0.000918096	0.0489501
chr15:59263236:59266642	30	74	94	60	53	276	-1.53975	1.86449	10.9503	0.000935895	0.0498346
chr12:81986052:81987048	281	196	271	281	133	320	-0.614237	3.14323	10.947	0.000937572	0.0498595
chr1:138023496:138023831	127	58	124	51	13	38	0.946634	1.20754	10.9342	0.000944057	0.0501267
chr14:119117639:119118207	335	209	311	128	80	140	0.618197	2.7462	10.9305	0.000945951	0.0501267
chr17:56260939:56261635	150	76	179	30	39	59	0.935664	1.57995	10.928	0.000947201	0.0501267
chr2:38866755:38867325	190	86	262	81	31	57	0.987188	1.95288	10.9269	0.000947785	0.0501267
chr6:72051232:72051845	86	63	110	86	66	108	-0.693465	1.66129	10.9243	0.000949119	0.0501267
chr19:41524066:41524448	99	61	74	70	68	107	-0.757526	1.55982	10.9214	0.000950615	0.0501267
chr13:51923936:51924554	189	96	254	84	28	67	0.928114	1.97737	10.9204	0.00095111	0.0501267
chr17:56144564:56145700	454	456	529	440	291	656	-0.592465	4.08352	10.9161	0.000953337	0.0501798
chr8:36197883:36198105	168	140	126	103	152	256	-0.932318	2.56251	10.9136	0.000954622	0.0501834
chr8:66744068:66744845	179	99	240	50	39	87	0.870793	1.94141	10.91	0.000956447	0.0502104
chr5:24569867:24570616	256	98	287	79	46	83	0.924998	2.21618	10.9079	0.000957571	0.0502104
chr3:65189489:65190142	397	241	436	164	76	184	0.686535	3.03768	10.9016	0.000960831	0.0503173
chr17:7713951:7714486	199	192	282	253	136	252	-0.593213	2.97926	10.8912	0.000966234	0.050536
chr8:122808859:122809438	254	88	218	72	43	65	0.931758	2.02946	10.883	0.000970521	0.0506135
chr1:192726538:192727128	51	57	86	61	56	89	-0.775104	1.30181	10.882	0.00097102	0.0506135
chr5:44478069:44478720	297	253	367	148	72	164	0.603572	2.85289	10.8799	0.000972157	0.0506135
chr11:54900378:54900814	152	86	128	45	30	61	0.754181	1.50824	10.879	0.000972628	0.0506135
chr1:135075117:135076124	355	358	383	312	250	512	-0.628984	3.71533	10.8738	0.000975351	0.0506912
chr11:29579819:29580300	83	79	81	120	48	88	-0.721058	1.60305	10.8586	0.000983393	0.0508649
chr6:56695885:56696489	76	130	98	184	68	116	-0.895198	2.04979	10.8554	0.000985107	0.0508649
chr1:58818148:58818723	188	139	165	219	101	166	-0.642307	2.56188	10.8535	0.00098609	0.0508649
chr19:34339801:34340724	907	530	790	417	153	263	0.764749	4.05454	10.8508	0.000987511	0.0508649
chr4:116044234:116044643	203	76	191	80	19	37	1.13151	1.73127	10.8501	0.00098789	0.0508649
chr7:105932341:105932858	149	147	181	167	89	216	-0.62575	2.50943	10.8497	0.0009881	0.0508649
chr8:86224135:86225069	433	259	257	419	170	506	-0.813999	3.61847	10.8482	0.000988918	0.0508649
chr10:82453414:82454242	156	120	205	173	93	213	-0.650338	2.52352	10.8471	0.000989491	0.0508649
chr15:38430038:38430768	76	71	65	97	36	98	-0.748708	1.42821	10.8465	0.000989801	0.0508649
chr11:93862582:93863788	86	92	121	73	150	137	-1.05803	2.07952	10.8372	0.000994796	0.051058
chr19:32294887:32295828	187	195	216	107	44	92	0.654666	2.24098	10.834	0.000996546	0.051058
chr11:53906564:53906929	120	92	139	53	31	51	0.700588	1.4696	10.8326	0.000997275	0.051058
chr13:13952801:13953336	566	464	599	384	539	837	-0.832838	4.40115	10.827	0.00100028	0.0510945
chr1:34302893:34303774	116	71	205	55	30	36	0.979742	1.51697	10.8267	0.00100047	0.0510945
chr3:151554602:151555151	305	196	247	129	60	111	0.657428	2.54751	10.822	0.00100301	0.0511607
chr8:91173416:91175539	1298	1278	1347	1367	737	1432	-0.494988	5.47653	10.8139	0.00100743	0.0513229
chr1:184559788:184560094	108	116	100	79	125	169	-0.919437	2.1335	10.8079	0.00101068	0.0513264
chr5:115631361:115632030	107	107	121	142	65	126	-0.640857	2.0132	10.8075	0.00101087	0.0513264
chr8:119725547:119726250	122	62	137	40	17	54	0.873482	1.28004	10.8069	0.00101123	0.0513264
chr15:95573895:95574785	251	145	333	126	34	85	0.928753	2.40407	10.8043	0.00101266	0.0513355
chr6:100659078:100659891	171	164	190	170	112	210	-0.569502	2.61629	10.7981	0.00101606	0.0514446
chr5:143653257:143654319	141	94	151	54	38	55	0.702429	1.59952	10.7935	0.00101859	0.0515093
chr17:44386395:44386969	140	124	172	142	84	221	-0.677796	2.40677	10.7836	0.00102403	0.0517212
chr5:137574757:137575188	101	103	89	128	63	108	-0.679609	1.85154	10.7779	0.00102716	0.0517728
chr4:4635297:4635788	180	74	179	70	25	46	0.943183	1.67046	10.7772	0.00102757	0.0517728
chr15:37362096:37363266	499	362	454	222	132	210	0.545511	3.39219	10.7583	0.00103814	0.0522417
chr8:58814066:58814891	648	269	707	199	66	257	1.01644	3.50253	10.7415	0.00104761	0.052654
chr12:81425657:81426565	124	114	171	118	106	182	-0.677764	2.31092	10.7353	0.00105113	0.0526778
chr11:69477289:69478012	58	77	79	103	39	92	-0.758878	1.44809	10.7352	0.00105115	0.0526778
chr7:93955026:93955211	100	94	70	72	86	138	-0.848275	1.80127	10.7319	0.00105305	0.0526778
chr4:88149378:88150555	757	470	725	274	197	336	0.585967	3.93202	10.7316	0.0010532	0.0526778
chr5:24746311:24746702	70	35	95	61	62	103	-0.88868	1.39064	10.7252	0.00105687	0.0527975
chr1:94301755:94302338	170	133	129	55	36	77	0.706296	1.7681	10.711	0.00106498	0.0531247
chr15:68079919:68080380	143	121	145	146	87	152	-0.5793	2.26103	10.7077	0.00106692	0.0531247
chr11:8821013:8821930	88	84	75	81	144	81	-1.12691	1.84963	10.707	0.00106729	0.0531247
chr2:148053136:148053954	440	258	458	172	84	203	0.677549	3.14575	10.7022	0.00107007	0.0531991
chr1:95142459:95143100	286	139	213	80	59	96	0.748568	2.28464	10.6965	0.00107339	0.0532994
chr18:75624029:75625553	437	545	609	517	330	736	-0.633112	4.25697	10.677	0.00108478	0.0538003
chr14:26420482:26420992	207	142	208	90	52	82	0.634459	2.13737	10.6714	0.00108803	0.0538405
chr13:51730937:51731345	67	40	67	44	54	99	-0.872994	1.1971	10.6711	0.0010882	0.0538405
chr1:194146457:194147067	132	80	154	50	36	47	0.758055	1.50214	10.6667	0.00109083	0.0539058
chr13:42588850:42590226	818	1056	865	429	285	381	0.651343	4.42473	10.6521	0.00109945	0.0542029
chr19:4022524:4023624	272	252	435	276	231	507	-0.752693	3.57837	10.6501	0.00110068	0.0542029
chr13:5825203:5825895	280	165	216	98	60	103	0.664646	2.36916	10.6499	0.00110079	0.0542029
chr11:81846279:81846868	80	46	86	82	36	127	-0.83847	1.46383	10.6443	0.00110409	0.0543006
chr8:32635224:32636017	251	144	296	101	38	116	0.795119	2.37408	10.641	0.0011061	0.0543346
chr10:69890809:69891525	193	95	213	78	37	63	0.807576	1.91677	10.6385	0.0011076	0.0543436
chrX:93340093:93340884	422	412	552	235	127	237	0.549058	3.46588	10.6359	0.00110915	0.0543549
chr14:105796701:105797069	169	99	148	54	40	64	0.709321	1.70197	10.6293	0.0011131	0.054418
chr11:78558886:78559371	226	153	186	90	50	88	0.640743	2.15974	10.6275	0.00111419	0.054418
chr9:77839910:77840593	330	184	432	127	66	154	0.777665	2.81796	10.6271	0.0011144	0.054418
chr2:50529721:50530801	416	299	546	178	101	228	0.65078	3.27934	10.6217	0.00111769	0.0544837
chr14:112918047:112918237	146	128	132	103	134	190	-0.783483	2.37091	10.6172	0.00112042	0.0544837
chr18:78394918:78395207	134	93	120	89	92	200	-0.805473	2.15334	10.6162	0.00112098	0.0544837
chr18:65070995:65071744	203	206	229	236	129	228	-0.552466	2.88884	10.616	0.00112115	0.0544837
chr9:48454183:48455269	573	280	459	217	109	163	0.739089	3.30497	10.6128	0.00112305	0.0544837
chr12:103625463:103625782	160	97	160	56	37	67	0.700905	1.70527	10.6118	0.00112368	0.0544837
chrX:96411979:96412446	136	121	157	75	37	45	0.719681	1.69852	10.606	0.00112722	0.0545618
chr2:103523024:103523413	155	102	185	71	35	63	0.710527	1.78057	10.6041	0.00112836	0.0545618
chr18:79564832:79566013	514	408	465	205	137	260	0.53975	3.47432	10.5984	0.00113184	0.0545618
chr14:67719822:67720631	268	130	333	108	52	96	0.828517	2.43491	10.5968	0.00113286	0.0545618
chr9:70736838:70737279	102	138	153	143	92	156	-0.656668	2.25518	10.5967	0.00113289	0.0545618
chr11:6656781:6657580	105	67	59	96	105	70	-0.996789	1.67683	10.5955	0.00113362	0.0545618
chr14:76620962:76622453	1639	1093	1634	766	397	728	0.541349	5.10479	10.594	0.00113455	0.0545618
chr13:19231424:19232145	352	363	332	130	92	205	0.650499	3.04302	10.5896	0.00113727	0.0546287
chr14:70491465:70492886	111	196	171	194	129	187	-0.757666	2.60858	10.5859	0.00113955	0.0546744
chr19:58000024:58000458	197	158	221	108	49	63	0.710872	2.16038	10.5834	0.00114109	0.0546808
chr2:26314939:26316849	225	202	266	282	130	246	-0.578158	3.01583	10.5779	0.00114447	0.0546808
chr15:97204182:97204604	79	96	118	104	60	138	-0.690464	1.84983	10.5774	0.00114476	0.0546808
chr2:32639576:32640229	223	118	175	81	37	78	0.73444	1.99271	10.5771	0.00114499	0.0546808
chr7:108362136:108363016	119	122	176	152	80	186	-0.651651	2.32677	10.5749	0.00114636	0.0546831
chr10:102131199:102131389	136	138	132	98	136	215	-0.84432	2.41226	10.5693	0.00114981	0.054772
chr1:188696857:188697395	72	36	109	56	104	115	-1.13469	1.63781	10.5676	0.00115088	0.054772
chr2:145608996:145609417	88	71	78	87	51	99	-0.659589	1.52776	10.564	0.00115313	0.0548154
chr8:108467066:108467777	337	235	365	130	96	160	0.591574	2.88584	10.5574	0.00115721	0.0549464
chr15:79855935:79856496	182	154	170	156	133	185	-0.59917	2.58082	10.54	0.00116821	0.0554046
chr2:125304297:125304980	260	151	297	102	30	121	0.864856	2.3881	10.5008	0.00119325	0.0565101
chr7:35743119:35743306	98	70	76	62	71	138	-0.828822	1.66568	10.4978	0.00119516	0.0565101
chr8:8407241:8407958	262	140	199	257	115	246	-0.689959	2.87048	10.4971	0.00119563	0.0565101
chr6:31072939:31073416	52	88	81	102	37	133	-0.889913	1.58627	10.4927	0.00119845	0.0565782
chr9:98346120:98346669	197	69	168	63	18	57	1.00726	1.65611	10.482	0.00120541	0.0568417
chr19:28497388:28497915	80	103	132	135	59	138	-0.713067	1.96697	10.4755	0.0012097	0.0569253
chr2:35364032:35364598	180	82	258	59	41	67	0.925208	1.92214	10.4751	0.00120994	0.0569253
chr9:51833324:51833822	172	52	237	64	21	37	1.22683	1.66508	10.4633	0.00121772	0.0572259
chr4:25399350:25399542	132	118	116	81	134	215	-0.939528	2.31748	10.46	0.00121985	0.0572608
chr16:13136041:13136843	60	60	103	55	101	107	-1.00903	1.61959	10.4534	0.00122424	0.0573192
chr13:94711094:94711274	80	79	74	57	77	125	-0.843193	1.61299	10.4498	0.00122662	0.0573192
chr11:79004703:79005066	129	43	126	44	14	33	1.0399	1.12533	10.4495	0.00122685	0.0573192
chr11:32463311:32464060	173	222	246	195	140	360	-0.749333	3.01692	10.4489	0.0012272	0.0573192
chr1:138961390:138961853	87	50	67	52	80	97	-0.904689	1.43898	10.4477	0.00122805	0.0573192
chr14:70394479:70395330	739	645	639	690	432	686	-0.506345	4.52828	10.4366	0.00123545	0.0575418
chr16:34743014:34743200	70	51	66	48	59	94	-0.800306	1.26402	10.4363	0.00123561	0.0575418
chr13:37852647:37853434	239	229	260	258	138	277	-0.536801	3.06826	10.433	0.00123784	0.0575804
chr8:67395334:67396246	438	271	377	194	94	149	0.641015	3.0787	10.4284	0.00124091	0.0575993
chr2:90262975:90263946	55	109	105	100	71	131	-0.819498	1.81569	10.4269	0.0012419	0.0575993
chrX:35687814:35688427	157	167	179	75	58	61	0.678875	1.99366	10.4261	0.00124247	0.0575993
chr10:90692835:90693653	1055	729	1034	479	233	511	0.555545	4.47271	10.4237	0.00124406	0.0575993
chr3:78731584:78732288	173	256	139	92	44	49	0.973315	2.09405	10.4199	0.00124667	0.0575993
chr8:76571110:76571595	69	72	85	62	87	92	-0.827707	1.54946	10.4167	0.0012488	0.0575993
chr5:135172144:135173273	89	111	136	109	103	125	-0.711733	2.05567	10.4159	0.00124937	0.0575993
chr7:105333662:105334256	326	135	343	111	48	119	0.868876	2.5561	10.4158	0.00124942	0.0575993
chr9:99058503:99059005	200	165	241	110	52	81	0.646005	2.25283	10.4124	0.0012517	0.0576201
chr11:64496034:64496206	83	56	58	57	57	96	-0.774233	1.32865	10.411	0.00125267	0.0576201
chr7:142788594:142790518	681	836	845	780	487	973	-0.568252	4.79238	10.3997	0.00126038	0.0578818
chr5:9068729:9069391	842	577	849	412	196	361	0.565102	4.1567	10.3941	0.00126421	0.0578818
chr4:42564973:42566415	608	371	580	444	418	625	-0.647	4.21461	10.3915	0.00126595	0.0578818
chr1:134052348:134052706	158	122	175	56	46	78	0.654473	1.8489	10.3912	0.00126619	0.0578818
chrX:74825238:74825749	147	148	197	63	53	78	0.654791	1.96305	10.3903	0.00126679	0.0578818
chr12:59639065:59639789	488	408	539	246	144	246	0.503023	3.53283	10.3884	0.00126811	0.0578818
chr13:47112578:47112947	126	77	133	39	37	46	0.753759	1.38862	10.3883	0.00126819	0.0578818
chr4:11634309:11635648	140	140	134	150	79	179	-0.617512	2.30887	10.3808	0.00127333	0.0580519
chr8:124955955:124957402	751	940	838	1028	473	1043	-0.625685	4.93111	10.3734	0.00127842	0.0581677
chr2:32520492:32521307	352	437	366	387	246	519	-0.630817	3.80455	10.373	0.00127869	0.0581677
chr14:35001845:35002130	123	97	131	51	33	54	0.66994	1.48318	10.3528	0.00129275	0.0586861
chr5:121357248:121357779	107	84	146	119	89	119	-0.658427	2.01694	10.3516	0.00129363	0.0586861
chr2:77039960:77040429	182	93	191	75	41	43	0.840506	1.80767	10.3506	0.00129436	0.0586861
chr7:107993786:107994291	159	93	146	64	39	42	0.755605	1.62402	10.3466	0.0012971	0.0587459
chr11:88829501:88830914	68	85	97	131	53	85	-0.756176	1.66419	10.3436	0.00129925	0.0587785
chr2:33015679:33016739	453	419	480	378	310	562	-0.560784	3.97426	10.3403	0.00130159	0.05882
chr5:135170932:135171826	81	131	121	118	91	137	-0.726407	2.06508	10.3303	0.00130867	0.0590752
chr12:72466981:72467605	255	123	290	82	40	115	0.83832	2.30818	10.3181	0.00131732	0.0594005
chr17:73325601:73326564	286	157	190	103	44	94	0.742088	2.2826	10.3117	0.00132188	0.0594827
chr13:98941892:98942515	114	72	108	91	73	126	-0.664203	1.82839	10.3115	0.00132203	0.0594827
chr17:47304979:47305514	186	212	229	226	129	234	-0.565388	2.87364	10.3094	0.00132356	0.0594866
chr3:52548047:52548839	393	223	317	89	100	149	0.750431	2.82298	10.3052	0.00132657	0.0595571
chr5:124111437:124112603	1122	858	1319	593	321	511	0.532828	4.70627	10.3003	0.0013301	0.05962
chr18:53094711:53095265	147	102	146	55	46	47	0.707524	1.63431	10.2971	0.0013324	0.05962
chr1:34357176:34357843	156	158	150	70	51	61	0.667347	1.88713	10.2958	0.00133336	0.05962
chr19:43684650:43685588	302	267	396	332	188	367	-0.541146	3.46678	10.294	0.00133462	0.05962
chr10:61289599:61290141	171	70	255	55	30	68	1.00725	1.82956	10.2927	0.00133558	0.05962
chr4:16095268:16096494	541	607	621	584	343	746	-0.55703	4.36678	10.2892	0.00133812	0.05962
chr19:54769770:54770324	258	174	206	113	50	94	0.654945	2.3261	10.2884	0.00133868	0.05962
chr6:22149853:22150403	182	121	220	76	31	94	0.73318	2.00755	10.2853	0.00134092	0.05962
chr6:54701743:54702553	236	227	292	225	189	278	-0.568977	3.13562	10.2841	0.00134181	0.05962
chr15:10609244:10609813	106	73	90	89	71	103	-0.655484	1.70226	10.283	0.00134262	0.05962
chr18:47385551:47386317	92	24	71	106	34	112	-1.06309	1.41592	10.2813	0.00134389	0.05962
chr2:56963589:56965012	130	155	171	148	129	163	-0.647364	2.46164	10.2768	0.00134717	0.0597012
chr8:67498758:67499170	56	52	80	44	70	99	-0.903174	1.32341	10.2688	0.00135296	0.0598935
chr5:136150389:136151082	226	182	238	200	126	302	-0.607406	2.93132	10.2664	0.00135473	0.0599014
chr5:91037770:91038515	336	194	299	120	64	149	0.657757	2.68588	10.2606	0.00135904	0.0599014
chr5:40015382:40016073	147	153	107	55	44	48	0.785862	1.67225	10.2599	0.00135955	0.0599014
chr9:122764069:122764621	117	73	132	117	64	142	-0.666988	1.95559	10.2596	0.00135974	0.0599014
chr10:60390769:60391875	148	46	151	141	80	203	-0.966778	2.21976	10.2587	0.0013604	0.0599014
chr5:111540226:111540814	101	120	147	118	80	173	-0.665578	2.16189	10.2514	0.00136578	0.0600369
chr5:67200133:67200695	170	63	191	55	24	58	0.954587	1.6328	10.2481	0.00136826	0.0600369
chr16:30507013:30507493	92	97	109	117	59	117	-0.62745	1.83839	10.2447	0.00137078	0.0600369
chr11:87368502:87369112	200	157	190	94	31	95	0.685053	2.09911	10.244	0.00137129	0.0600369
chr18:36832064:36832884	51	31	87	37	87	101	-1.20471	1.32342	10.2438	0.00137147	0.0600369
chr19:46764100:46764833	398	290	372	158	123	156	0.576118	3.07419	10.2428	0.00137222	0.0600369
chr14:37677157:37677651	233	198	257	122	62	106	0.579884	2.45933	10.2396	0.00137458	0.0600762
chr15:66511364:66512238	364	169	405	135	57	145	0.818961	2.79139	10.2346	0.00137828	0.0601388
chr2:90303756:90304466	68	76	77	94	44	88	-0.6799	1.44487	10.2338	0.00137893	0.0601388
chr16:10366399:10367211	392	242	297	330	201	344	-0.583107	3.44223	10.2176	0.00139106	0.0605809
chr1:129310993:129311550	207	104	344	87	41	83	0.946507	2.23669	10.2141	0.00139369	0.0605809
chr13:98004882:98005311	199	172	208	83	39	115	0.652573	2.19118	10.2136	0.0013941	0.0605809
chr1:16884398:16885100	51	55	79	43	80	93	-0.97213	1.33839	10.2123	0.00139505	0.0605809
chr6:125544313:125545201	203	150	223	91	51	96	0.604516	2.19451	10.209	0.00139759	0.0605809
chr15:77643789:77645222	692	469	692	338	146	298	0.592911	3.85659	10.2086	0.00139789	0.0605809
chr10:39117271:39118193	273	202	274	124	80	103	0.594874	2.57291	10.2057	0.00140009	0.0605947
chr7:29744510:29746201	710	496	752	318	177	357	0.536824	3.95654	10.2043	0.00140114	0.0605947
chr13:98499924:98500507	94	78	93	68	108	110	-0.863754	1.7935	10.1971	0.00140658	0.0607661
chr4:119895707:119896924	359	489	468	431	296	560	-0.618493	3.98153	10.1888	0.00141296	0.0609778
chr5:77357128:77357733	171	119	169	79	37	68	0.651809	1.85992	10.1861	0.001415	0.0610018
chr9:117997985:118001284	68	62	116	62	57	272	-1.26815	1.961	10.1733	0.00142487	0.0613615
chr9:95540330:95541031	209	198	252	187	140	356	-0.69553	3.01543	10.1715	0.00142632	0.0613615
chr14:47341668:47342012	142	125	149	55	38	75	0.641877	1.73302	10.169	0.00142823	0.0613795
chrX:68359237:68359995	284	132	254	110	48	88	0.772112	2.33911	10.1626	0.00143318	0.0615282
chr13:24345452:24346225	447	270	330	194	80	129	0.7176	3.00295	10.1569	0.00143765	0.0615785
chr13:63432511:63433179	206	159	200	95	47	94	0.599746	2.17371	10.1555	0.00143868	0.0615785
chr9:72902801:72903938	960	615	1107	471	224	404	0.616858	4.36921	10.1553	0.00143883	0.0615785
chr13:52579477:52579953	131	110	149	60	31	66	0.650417	1.63504	10.152	0.00144145	0.0616263
chrX:12402367:12402916	172	117	191	49	56	72	0.722205	1.89647	10.1476	0.00144485	0.061708
chr15:86050173:86051423	563	317	662	233	113	255	0.696385	3.54326	10.1445	0.00144729	0.0617482
chr11:71561022:71562086	561	521	608	510	329	747	-0.553406	4.29122	10.1409	0.00145018	0.0618075
chr4:106460206:106460871	413	209	312	160	69	127	0.728409	2.82987	10.1378	0.0014526	0.0618465
chr9:59328323:59328895	47	37	132	114	48	122	-1.05719	1.60604	10.1357	0.00145428	0.0618541
chr13:49676839:49677974	369	270	381	141	97	194	0.569475	3.01734	10.1284	0.00145999	0.062033
chr11:71958609:71959032	124	85	152	57	34	44	0.72522	1.49589	10.1186	0.0014678	0.0622674
chr7:106589879:106590587	355	289	330	345	221	307	-0.526271	3.48029	10.1177	0.00146853	0.0622674
chr15:5634073:5634665	85	51	90	54	71	130	-0.875801	1.56819	10.1153	0.00147047	0.0622858
chr5:80929815:80930045	206	162	241	132	208	358	-0.912578	3.02264	10.112	0.0014731	0.0623328
chr6:4873704:4874257	1346	1170	1183	892	1188	1794	-0.780519	5.56337	10.105	0.00147866	0.0625042
chr10:12683687:12684933	457	428	349	430	284	453	-0.582756	3.86722	10.1016	0.00148138	0.0625446
chr5:97234802:97235502	459	338	519	251	89	191	0.666611	3.3406	10.0983	0.00148406	0.0625446
chr10:17589619:17590206	295	191	313	116	76	136	0.603018	2.65328	10.0964	0.00148557	0.0625446
chr17:24780824:24783452	1075	954	974	940	581	1240	-0.522357	5.10666	10.0963	0.00148569	0.0625446
chr9:44540936:44543654	2968	2669	2837	2741	1636	2929	-0.44385	6.55654	10.0884	0.00149202	0.062747
chr17:29530546:29531532	144	238	168	201	122	305	-0.799887	2.84858	10.0836	0.00149591	0.0628464
chr13:109239657:109240202	120	111	150	63	27	62	0.670523	1.59602	10.0789	0.00149978	0.0629146
chr4:123099917:123100723	437	419	494	548	214	628	-0.649245	4.0255	10.0766	0.00150164	0.0629146
chr2:53546187:53546719	210	169	229	93	43	116	0.626192	2.26508	10.076	0.00150211	0.0629146
chr2:20576769:20577459	326	206	271	94	99	101	0.713845	2.62737	10.0697	0.00150728	0.0630669
chr2:116173974:116174677	180	159	150	72	49	77	0.634817	1.96951	10.0663	0.00151008	0.0631202
chr5:123500717:123501512	755	371	748	286	168	264	0.687682	3.82482	10.0539	0.00152026	0.0634224
chr9:48461695:48462335	325	214	294	144	82	112	0.615085	2.71367	10.0537	0.00152039	0.0634224
chr10:120128433:120128895	152	112	112	56	33	58	0.689742	1.57865	10.0491	0.00152426	0.0635196
chr4:53327642:53328979	872	947	841	844	554	1109	-0.557922	4.96102	10.0469	0.00152605	0.0635299
chr14:21802922:21803565	344	248	323	146	88	160	0.545904	2.87441	10.0407	0.00153118	0.0636791
chr17:74314946:74315576	98	86	155	92	113	149	-0.79493	2.09901	10.024	0.0015451	0.0641933
chr10:121233090:121233632	62	102	80	136	49	97	-0.826368	1.68941	10.014	0.00155353	0.0644785
chr3:104211456:104211931	209	213	177	96	37	107	0.704328	2.23557	9.99998	0.00156542	0.064892
chr8:48456737:48457240	101	102	126	45	31	53	0.678339	1.39454	9.99854	0.00156664	0.064892
chr10:80131222:80133583	358	292	465	452	238	352	-0.583894	3.69654	9.99147	0.00157267	0.0650587
chr2:13251426:13251914	126	85	95	103	61	150	-0.682403	1.9051	9.99012	0.00157382	0.0650587
chr19:34626196:34627101	397	275	409	180	82	195	0.593808	3.08769	9.98809	0.00157556	0.0650652
chr6:37925974:37926566	74	62	91	52	96	108	-0.930861	1.60388	9.98576	0.00157756	0.0650825
chr7:73528946:73529667	273	143	227	105	36	103	0.760133	2.29139	9.98364	0.00157937	0.0650921
chr7:118037349:118038006	127	167	157	74	28	75	0.724416	1.82907	9.97583	0.00158608	0.0653035
chr5:134657916:134659439	648	567	1206	412	164	309	0.788825	4.15492	9.97132	0.00158998	0.0653985
chr5:116898779:116899294	223	117	240	93	29	90	0.811925	2.12322	9.96301	0.00159717	0.0655389
chr19:26965644:26966179	162	85	142	52	21	71	0.789818	1.578	9.95956	0.00160017	0.0655389
chr6:85306890:85307447	98	60	111	89	65	112	-0.669914	1.69942	9.95782	0.00160167	0.0655389
chr14:64578429:64578925	75	113	84	116	63	108	-0.720804	1.77878	9.95572	0.00160351	0.0655389
chr6:51530071:51530669	264	233	255	115	71	138	0.555045	2.6001	9.95539	0.00160379	0.0655389
chr18:21280354:21280787	173	111	159	66	30	80	0.680096	1.79911	9.95538	0.0016038	0.0655389
chr10:60888736:60889731	634	517	754	331	193	317	0.502555	3.93419	9.95455	0.00160452	0.0655389
chr3:138094706:138095240	127	105	125	52	33	58	0.649648	1.51676	9.95087	0.00160773	0.0656049
chr3:153324829:153325566	183	117	178	82	47	48	0.731719	1.8883	9.94488	0.00161297	0.0657084
chr7:108190038:108191222	252	249	210	272	134	294	-0.606505	3.08595	9.94108	0.0016163	0.0657084
chr7:134093172:134093641	135	104	134	67	35	40	0.709314	1.55593	9.94072	0.00161662	0.0657084
chr5:106605733:106605932	208	148	148	136	168	215	-0.765445	2.66922	9.93949	0.0016177	0.0657084
chr13:105306789:105307393	203	118	246	89	45	82	0.711461	2.12394	9.93888	0.00161824	0.0657084
chr7:96274956:96275395	126	87	149	51	14	68	0.819366	1.47018	9.93465	0.00162196	0.0657948
chr10:39277638:39278236	225	137	252	111	48	73	0.724675	2.23508	9.92668	0.001629	0.0660153
chr17:32033675:32034836	1019	1094	1281	1182	600	1484	-0.569745	5.30875	9.92417	0.00163122	0.0660404
chr1:188554299:188556574	125	42	211	150	154	178	-1.13272	2.42991	9.91908	0.00163574	0.0661584
chr11:100759148:100759564	113	131	129	196	67	137	-0.72514	2.22604	9.91329	0.0016409	0.0663018
chr1:51019189:51019817	260	261	296	134	89	123	0.559103	2.71804	9.9045	0.00164875	0.0665541
chr17:79686453:79687384	294	276	295	156	89	106	0.619557	2.77742	9.90259	0.00165046	0.0665579
chr1:37568624:37569890	1234	950	1472	663	319	617	0.534499	4.85255	9.89683	0.00165564	0.0667013
chr2:132334844:132335625	760	549	711	339	159	382	0.559999	3.99759	9.88785	0.00166374	0.0669465
chr1:153471612:153472294	332	200	278	134	58	138	0.647831	2.65984	9.88364	0.00166754	0.0669465
chr12:32327609:32328386	173	85	134	61	27	58	0.76043	1.59901	9.88254	0.00166855	0.0669465
chr3:128976011:128976518	144	57	161	43	32	43	0.896711	1.43196	9.88161	0.00166939	0.0669465
chr2:58368206:58370004	650	695	869	722	420	918	-0.540796	4.67236	9.88111	0.00166985	0.0669465
chr4:133169779:133170853	1357	1468	1434	1537	846	1454	-0.5005	5.60283	9.87568	0.00167478	0.067079
chr12:56538063:56538556	95	105	137	136	56	160	-0.688532	2.04845	9.8724	0.00167777	0.0671335
chr7:118862281:118862850	295	246	221	237	173	319	-0.597328	3.17529	9.85754	0.00169137	0.0676121
chr15:38412556:38417614	729	902	866	975	469	969	-0.578294	4.88099	9.84953	0.00169875	0.0678413
chr16:24487710:24488306	223	104	231	95	41	57	0.840651	2.0566	9.8469	0.00170118	0.0678728
chr11:82728338:82728932	206	129	230	101	39	80	0.698912	2.12783	9.84466	0.00170325	0.0678896
chr8:67108100:67108882	232	256	267	262	139	326	-0.578342	3.15013	9.82286	0.00172356	0.0686327
chr3:18115366:18115888	137	91	111	151	78	107	-0.663587	2.0373	9.82068	0.0017256	0.0686477
chr11:106248706:106249554	128	182	154	175	86	249	-0.740001	2.55834	9.8152	0.00173075	0.0687861
chr15:6266832:6267013	103	68	66	66	64	127	-0.786105	1.60136	9.81029	0.00173538	0.0688508
chr17:67612080:67612726	190	189	176	203	127	187	-0.567277	2.70257	9.80867	0.00173691	0.0688508
chr17:6017302:6017985	96	59	88	91	52	97	-0.651107	1.54969	9.80595	0.00173948	0.0688508
chr8:86713375:86713984	296	366	457	388	220	483	-0.606402	3.72858	9.80547	0.00173993	0.0688508
chr8:114137068:114137452	104	65	71	81	56	107	-0.689784	1.56094	9.80463	0.00174073	0.0688508
chr12:56575909:56576599	202	207	200	231	123	215	-0.554855	2.82813	9.79152	0.00175319	0.069277
chr8:74119806:74120227	191	168	227	93	48	106	0.58959	2.22752	9.78839	0.00175617	0.0693284
chr18:55326872:55327264	152	115	119	62	38	51	0.676651	1.62002	9.78553	0.0017589	0.0693698
chr7:87921749:87922489	201	183	132	219	135	171	-0.698001	2.67937	9.77283	0.0017711	0.069784
chr18:75616245:75616841	277	339	266	382	170	347	-0.64837	3.42846	9.7674	0.00177634	0.0699085
chr1:96043381:96044165	338	277	347	175	87	158	0.534973	2.95174	9.76451	0.00177913	0.0699085
chr1:156911032:156911863	272	196	316	252	150	350	-0.595366	3.19509	9.76372	0.0017799	0.0699085
chr10:116285809:116286260	199	127	221	77	47	95	0.645794	2.10184	9.76242	0.00178115	0.0699085
chr5:149255190:149256150	807	489	550	319	160	272	0.63533	3.84287	9.76075	0.00178277	0.0699085
chr15:10747600:10748901	1785	1809	1966	1717	1095	2025	-0.456659	5.95683	9.75903	0.00178444	0.0699085
chr9:34193492:34194117	260	168	298	121	68	101	0.634658	2.50409	9.75694	0.00178647	0.0699217
chr10:114174363:114174557	156	148	134	108	153	204	-0.80387	2.49612	9.75152	0.00179174	0.0700616
chr5:147517566:147517892	120	102	97	46	28	51	0.689106	1.3527	9.74518	0.00179794	0.0701773
chr11:75595442:75595793	138	103	141	55	31	68	0.646943	1.60634	9.745	0.00179811	0.0701773
chr12:112830505:112831080	134	52	199	53	25	37	1.03332	1.47058	9.74208	0.00180097	0.0702225
chr2:128398732:128399247	204	153	174	83	48	90	0.600689	2.08929	9.73749	0.00180547	0.0703316
chr1:38534886:38535551	152	128	216	82	44	70	0.659133	1.96283	9.72905	0.00181379	0.0705887
chr9:56285170:56285426	74	86	130	94	65	140	-0.705933	1.83699	9.71994	0.0018228	0.0708725
chr3:132947120:132948113	517	487	645	284	179	255	0.514417	3.72866	9.71481	0.00182789	0.0709609
chr15:52890080:52890585	131	144	130	76	32	49	0.714913	1.68137	9.71418	0.00182852	0.0709609
chr6:118259874:118260438	150	104	127	133	78	151	-0.588467	2.16217	9.70541	0.00183726	0.0712333
chr1:106189907:106190343	68	51	90	52	92	89	-0.932867	1.47786	9.70233	0.00184035	0.0712857
chr15:101168710:101169179	221	111	178	78	37	81	0.716196	1.98021	9.69567	0.00184703	0.0714775
chr10:67588602:67589208	82	85	117	88	61	138	-0.672153	1.78983	9.68577	0.001857	0.0717959
chr5:134912624:134913938	1070	1053	1265	1084	657	1176	-0.446592	5.23206	9.68114	0.00186169	0.0718734
chr9:57840626:57841349	233	232	357	352	158	292	-0.620669	3.28224	9.68035	0.00186249	0.0718734
chr10:28749826:28750068	101	56	87	77	64	102	-0.685031	1.57231	9.67512	0.0018678	0.0720107
chr4:124801515:124803096	380	390	341	396	204	490	-0.593976	3.72223	9.67144	0.00187154	0.0720876
chr7:75209560:75210235	166	131	183	168	96	177	-0.544514	2.46576	9.66071	0.00188251	0.0723682
chr18:76498737:76499399	128	92	117	99	86	137	-0.621698	2.00459	9.65435	0.00188904	0.0723682
chr6:89301396:89302063	153	88	166	65	35	55	0.706389	1.66578	9.65404	0.00188936	0.0723682
chr2:156836439:156837104	104	74	119	144	78	82	-0.733421	1.87973	9.65386	0.00188954	0.0723682
chr11:109608615:109609024	107	129	132	115	90	150	-0.618693	2.1403	9.65334	0.00189008	0.0723682
chr4:102257985:102258424	117	167	121	175	95	149	-0.694838	2.33666	9.65275	0.00189068	0.0723682
chr18:5740314:5740828	203	163	192	220	113	184	-0.554402	2.69302	9.65233	0.00189112	0.0723682
chr10:79806888:79807480	175	122	235	55	54	89	0.722137	2.03457	9.64534	0.00189832	0.0725765
chr10:94334708:94334911	184	173	156	121	166	270	-0.814846	2.73327	9.64116	0.00190265	0.0726744
chr15:74748627:74749117	79	94	66	84	58	105	-0.698815	1.57817	9.63731	0.00190665	0.0727598
chrX:70437126:70437714	288	157	267	104	65	115	0.642797	2.47373	9.62774	0.00191661	0.0730722
chr7:137587482:137588580	61	71	113	49	118	144	-1.11295	1.82249	9.62507	0.00191939	0.0731108
chr2:27994069:27994709	134	83	270	42	35	74	0.986205	1.81201	9.61958	0.00192514	0.073262
chr5:93157215:93157742	231	167	186	96	58	86	0.606983	2.22212	9.61362	0.0019314	0.0733678
chr14:76466531:76467277	129	158	137	65	36	69	0.669783	1.76279	9.61292	0.00193213	0.0733678
chr1:93270122:93270712	112	75	83	85	54	151	-0.739749	1.76122	9.61185	0.00193326	0.0733678
chr4:114338176:114338741	246	163	215	92	61	106	0.592172	2.31495	9.60788	0.00193744	0.0733906
chr8:96694786:96697276	2780	1897	2210	1270	657	1040	0.547713	5.76675	9.60784	0.00193748	0.0733906
chr2:101283254:101283758	120	69	182	45	4	57	1.22399	1.38656	9.60461	0.0019409	0.0733906
chr16:90517128:90517692	115	142	158	75	26	62	0.712026	1.71059	9.60452	0.00194099	0.0733906
chr19:41910122:41910814	305	300	281	322	168	335	-0.538324	3.35942	9.59934	0.00194648	0.0735308
chr18:39783905:39784291	238	135	209	108	47	54	0.79029	2.14255	9.59564	0.00195039	0.0736113
chr5:122283483:122284678	476	611	561	611	346	596	-0.562584	4.27402	9.5806	0.00196644	0.0741489
chr14:87055994:87056429	125	115	107	64	22	50	0.711469	1.46285	9.56691	0.00198116	0.074554
chr2:118345651:118346191	339	257	369	133	101	177	0.549241	2.94669	9.56478	0.00198346	0.074554
chr8:36306546:36307088	302	170	249	120	63	107	0.639138	2.49705	9.56389	0.00198442	0.074554
chr18:11264221:11264683	72	112	90	111	63	110	-0.69791	1.77378	9.56343	0.00198492	0.074554
chr18:47213653:47214436	192	179	289	84	64	116	0.639546	2.37323	9.56087	0.00198769	0.074554
chr7:117994905:117995437	143	93	139	58	33	58	0.655949	1.57528	9.56055	0.00198803	0.074554
chr5:121156347:121156916	90	28	89	99	42	104	-0.904288	1.4543	9.55501	0.00199404	0.0747112
chr14:67477443:67478134	114	106	84	126	55	135	-0.680348	1.90795	9.55182	0.00199751	0.0747733
chr12:17513727:17514527	213	174	249	219	111	283	-0.587304	2.89451	9.55011	0.00199937	0.0747751
chr18:34010120:34010577	172	141	129	80	41	40	0.775996	1.78005	9.54243	0.00200776	0.0748754
chr14:43783935:43785264	94	76	103	60	94	145	-0.847673	1.82783	9.54203	0.0020082	0.0748754
chr17:48211604:48212284	61	51	90	51	75	91	-0.842152	1.38404	9.54189	0.00200835	0.0748754
chr1:179409323:179409890	205	230	196	118	42	94	0.689708	2.31497	9.541	0.00200932	0.0748754
chr16:42746090:42746713	161	112	142	143	80	172	-0.584006	2.28117	9.5388	0.00201173	0.0748974
chr6:23741746:23742211	164	82	136	60	30	54	0.731312	1.57165	9.53527	0.00201561	0.0749741
chr6:127046432:127047009	79	47	70	46	86	89	-0.940506	1.39428	9.53336	0.00201771	0.0749845
chr5:144378241:144379097	201	147	153	86	40	78	0.642106	1.99477	9.5287	0.00202283	0.0751071
chr11:53587088:53588923	214	265	215	267	133	294	-0.623333	3.06625	9.52654	0.00202521	0.0751279
chr3:115461081:115462127	1030	1142	946	1023	658	1239	-0.550053	5.18866	9.51381	0.00203931	0.0755828
chr6:33773588:33774429	620	395	530	278	126	253	0.580745	3.60424	9.501	0.0020536	0.0760238
chr11:70031353:70032641	145	156	178	171	88	199	-0.577034	2.49052	9.49676	0.00205835	0.0760238
chr19:10159063:10159548	109	127	118	130	75	136	-0.599086	2.076	9.49525	0.00206005	0.0760238
chr19:16440743:16441589	252	212	234	112	67	123	0.545745	2.49741	9.49466	0.0020607	0.0760238
chr13:41443185:41443920	89	109	109	93	73	139	-0.651261	1.89997	9.49464	0.00206073	0.0760238
chr9:9127196:9127784	140	81	135	64	27	43	0.73409	1.47361	9.49327	0.00206227	0.0760238
chr3:84329301:84330103	159	182	174	204	93	207	-0.599381	2.61487	9.48954	0.00206647	0.0761104
chr1:191679010:191679433	116	63	124	25	27	54	0.82307	1.21895	9.48361	0.00207316	0.0762744
chr11:53953464:53954224	52	220	97	161	102	438	-1.44437	2.74763	9.48114	0.00207594	0.0762744
chr7:36084301:36085135	507	491	470	286	120	217	0.597806	3.54163	9.48067	0.00207648	0.0762744
chr14:8838459:8838773	312	267	338	213	282	445	-0.749	3.51977	9.47746	0.00208012	0.0763386
chr4:137423146:137424221	362	320	511	336	255	626	-0.684168	3.85482	9.47587	0.00208193	0.0763386
chr8:77613206:77613923	404	289	463	176	106	214	0.551396	3.1975	9.46039	0.00209956	0.0769168
chr1:121404796:121405702	920	831	812	850	481	988	-0.497285	4.86527	9.45164	0.00210961	0.0772161
chr14:8656713:8657818	382	312	324	190	86	161	0.571652	3.02437	9.44994	0.00211156	0.0772191
chr6:136819911:136820722	165	116	148	61	40	74	0.621941	1.77935	9.44219	0.0021205	0.077396
chr5:123097704:123098363	79	98	87	85	71	105	-0.659061	1.69128	9.43863	0.00212462	0.077396
chr11:77254092:77254831	160	97	136	69	26	59	0.696666	1.62703	9.43829	0.00212501	0.077396
chr8:122303077:122303676	277	240	343	142	77	154	0.542653	2.78574	9.43696	0.00212655	0.077396
chr5:104249729:104250959	836	677	1014	418	216	485	0.525016	4.3281	9.4366	0.00212697	0.077396
chr17:66050746:66051951	599	395	536	268	133	264	0.544437	3.60424	9.436	0.00212767	0.077396
chr11:86137661:86138193	205	181	205	106	31	103	0.684353	2.21215	9.43182	0.00213253	0.0775044
chr10:79566874:79567336	121	124	102	140	82	117	-0.631032	2.06756	9.42848	0.00213641	0.0775771
chr17:87449602:87450177	273	180	299	118	81	104	0.608212	2.56621	9.42552	0.00213987	0.0775854
chr6:146742095:146742528	85	78	105	82	73	102	-0.633556	1.68439	9.42506	0.0021404	0.0775854
chr6:4367006:4367695	402	227	391	174	80	161	0.633277	2.98504	9.41631	0.00215064	0.0778537
chr3:108099216:108100081	272	107	307	94	42	100	0.868353	2.33022	9.4155	0.00215158	0.0778537
chr17:27302850:27303378	71	47	109	52	93	119	-0.980125	1.61921	9.41185	0.00215588	0.0779233
chr13:74438522:74438943	137	90	144	62	27	58	0.671295	1.55248	9.41065	0.00215729	0.0779233
chr2:30542447:30543052	112	81	125	113	72	114	-0.59231	1.90034	9.40884	0.00215941	0.0779318
chr7:75901619:75902052	60	79	94	109	40	99	-0.719668	1.54305	9.4024	0.00216702	0.0780863
chr2:91023815:91024363	104	106	117	108	64	146	-0.606968	1.96026	9.40197	0.00216753	0.0780863
chr6:17523049:17523983	523	628	607	582	354	690	-0.532289	4.34647	9.4004	0.00216938	0.0780863
chr2:131977293:131977767	75	68	124	90	59	120	-0.682091	1.69798	9.39602	0.00217457	0.0782048
chr6:119394137:119394519	179	100	153	62	41	66	0.668578	1.76704	9.39226	0.00217903	0.078297
chr16:34847611:34848166	246	128	219	96	44	93	0.682959	2.20142	9.39007	0.00218164	0.0783017
chr18:11100784:11101202	68	70	65	88	33	93	-0.700702	1.33931	9.3881	0.00218398	0.0783017
chr11:69478926:69480077	182	179	215	206	117	199	-0.52281	2.72214	9.38736	0.00218486	0.0783017
chr12:118719415:118719898	126	120	128	169	102	101	-0.688095	2.19826	9.38455	0.00218822	0.0783539
chr13:73855754:73856101	158	125	146	51	38	84	0.648241	1.77331	9.38202	0.00219124	0.0783938
chr4:88342279:88342710	158	105	157	48	42	75	0.663132	1.73156	9.37689	0.00219738	0.0785455
chr2:101694851:101695569	365	374	375	208	108	160	0.564521	3.16026	9.37237	0.00220281	0.0786711
chr7:71384541:71385232	191	95	189	162	99	217	-0.678707	2.51528	9.36605	0.00221042	0.0788745
chr11:60468048:60468953	90	60	122	79	111	99	-0.868638	1.81387	9.36091	0.00221662	0.0789361
chr2:132141536:132142175	466	421	482	187	122	285	0.558153	3.44968	9.35989	0.00221785	0.0789361
chr3:153326602:153327575	300	160	319	124	58	124	0.680792	2.58206	9.35567	0.00222297	0.0789361
chr16:55794562:55795343	76	108	81	116	57	103	-0.696989	1.72691	9.35413	0.00222483	0.0789361
chr15:79564844:79566510	868	398	676	344	150	217	0.769369	3.85111	9.35406	0.00222492	0.0789361
chr16:30769016:30769817	115	63	89	125	39	138	-0.790667	1.77245	9.3537	0.00222536	0.0789361
chr14:106362315:106363222	92	66	79	52	87	123	-0.868694	1.63801	9.35354	0.00222555	0.0789361
chr3:115906937:115908712	791	814	736	764	518	806	-0.503564	4.74324	9.34571	0.00223508	0.079088
chr1:157351583:157352448	434	277	444	189	121	171	0.567786	3.19002	9.34495	0.00223601	0.079088
chr7:75272272:75273037	285	151	254	105	56	115	0.652496	2.42582	9.34425	0.00223686	0.079088
chr7:150822333:150823061	85	97	109	82	83	121	-0.666852	1.82669	9.34372	0.00223751	0.079088
chr7:74209160:74210148	647	446	569	309	158	246	0.549523	3.72341	9.33553	0.00224753	0.0793741
chr1:133451573:133452080	336	207	323	153	77	128	0.59918	2.76947	9.32704	0.00225797	0.0796521
chr15:79533221:79534054	75	65	93	53	113	100	-0.985046	1.66723	9.32599	0.00225926	0.0796521
chr6:113342076:113343032	359	315	346	198	90	149	0.566973	3.02829	9.32429	0.00226136	0.079658
chr9:45727900:45728514	180	83	171	81	21	46	0.899895	1.69173	9.31791	0.00226925	0.0798676
chr2:28028496:28029823	941	901	1103	893	567	1100	-0.456951	5.03478	9.31127	0.00227748	0.0800242
chr14:58690546:58691247	413	342	396	181	135	183	0.51468	3.21966	9.30984	0.00227927	0.0800242
chr17:8244122:8244442	142	115	123	45	40	66	0.653867	1.60589	9.30909	0.0022802	0.0800242
chr4:141735283:141735895	147	101	173	58	30	79	0.674962	1.72571	9.30807	0.00228147	0.0800242
chr3:101084125:101084794	198	127	179	163	103	206	-0.571849	2.54943	9.30372	0.0022869	0.0801464
chr14:66424528:66425143	111	118	137	61	37	47	0.65717	1.55275	9.30109	0.00229017	0.080193
chr12:117603991:117604451	138	166	209	67	57	78	0.653856	2.02496	9.2887	0.00230572	0.0806433
chr6:15586150:15586894	277	267	315	292	158	325	-0.500975	3.2849	9.28772	0.00230695	0.0806433
chr13:113531998:113532617	143	188	257	243	105	267	-0.691887	2.8506	9.27748	0.00231989	0.081027
chr4:150897867:150898586	98	71	163	87	86	215	-0.899666	2.13103	9.27064	0.00232856	0.0812612
chr9:65409577:65410417	381	432	541	455	254	567	-0.556309	3.97288	9.26134	0.00234041	0.0816019
chr6:144593281:144593606	122	92	139	56	33	52	0.644351	1.49627	9.25988	0.00234229	0.0816019
chr3:126401350:126402381	421	398	539	235	124	245	0.511383	3.45053	9.24477	0.00236169	0.0822084
chr3:122806006:122806580	234	215	262	111	76	121	0.530547	2.5282	9.24183	0.00236549	0.082271
chr1:135808037:135808623	203	169	217	188	114	234	-0.522797	2.75022	9.23599	0.00237304	0.0824232
chr5:114368565:114369206	215	129	159	187	98	201	-0.605448	2.56923	9.23536	0.00237386	0.0824232
chr3:126260650:126261379	259	205	219	114	69	108	0.559754	2.46245	9.23138	0.00237903	0.082533
chr8:121544625:121545214	298	142	218	127	36	58	0.921895	2.27291	9.22503	0.00238729	0.0827052
chr15:66731121:66731572	133	85	136	49	31	60	0.662395	1.49107	9.22448	0.002388	0.0827052
chr15:78756344:78759137	1836	1801	1750	1780	1083	1813	-0.45569	5.91458	9.21765	0.00239693	0.0828791
chr19:36777883:36778059	75	69	67	58	57	99	-0.69495	1.38617	9.21334	0.00240258	0.0828791
chr14:26842000:26843064	1345	824	1188	999	693	1427	-0.5622	5.27392	9.21301	0.00240302	0.0828791
chr3:133202900:133203525	233	150	204	99	56	87	0.599977	2.22488	9.21224	0.00240403	0.0828791
chr10:47172027:47172482	120	81	143	100	84	149	-0.642305	2.03583	9.21213	0.00240416	0.0828791
chr4:134847749:134849034	752	832	767	769	438	1091	-0.586576	4.79908	9.21143	0.00240509	0.0828791
chr8:106615268:106615839	73	61	81	56	58	104	-0.702476	1.40841	9.19603	0.00242541	0.0833171
chr17:29587472:29588509	306	370	380	312	218	538	-0.648341	3.67809	9.19583	0.00242568	0.0833171
chr17:13836307:13837851	552	403	624	490	318	581	-0.491527	4.14451	9.19558	0.002426	0.0833171
chr15:36711201:36712279	247	284	257	126	73	138	0.576819	2.66812	9.19482	0.00242701	0.0833171
chr15:99494492:99495736	370	445	308	392	248	484	-0.635562	3.77318	9.19414	0.00242791	0.0833171
chr5:136677703:136678013	116	109	135	62	32	52	0.63345	1.53364	9.18643	0.00243816	0.0835299
chr2:104421320:104422042	506	388	558	250	108	273	0.564413	3.52108	9.18643	0.00243816	0.0835299
chr16:31833923:31834648	549	425	645	284	142	290	0.51867	3.69263	9.184	0.0024414	0.0835712
chr18:52838976:52839472	151	83	147	64	22	60	0.731465	1.56638	9.18213	0.0024439	0.0835873
chr5:123444351:123444888	367	280	316	159	104	154	0.527874	2.95993	9.17304	0.00245606	0.0839338
chr5:33564550:33565386	220	175	179	96	53	93	0.584346	2.20858	9.16668	0.00246461	0.0840785
chr8:40240567:40241364	155	82	127	78	120	230	-0.938453	2.29204	9.16537	0.00246638	0.0840785
chr9:44774859:44775172	222	189	185	103	54	95	0.584155	2.26367	9.16534	0.00246642	0.0840785
chr7:87352132:87352814	215	192	165	193	113	249	-0.594767	2.76329	9.15574	0.00247939	0.0844509
chr2:17779785:17780228	138	69	134	56	26	45	0.744806	1.40623	9.14985	0.00248739	0.0846533
chr19:34402366:34403183	522	196	459	167	77	179	0.811888	3.11471	9.14769	0.00249032	0.0846832
chr3:151053621:151054238	310	219	300	160	68	118	0.599364	2.71246	9.14312	0.00249654	0.0847471
chr10:115767117:115768607	348	247	342	158	103	134	0.551659	2.90507	9.14197	0.00249812	0.0847471
chr11:60825431:60825808	153	83	143	72	27	38	0.791189	1.54119	9.14179	0.00249837	0.0847471
chr2:74237601:74238190	80	51	80	49	72	104	-0.813948	1.43393	9.13934	0.00250172	0.0847622
chr14:123319209:123319803	182	153	208	101	46	80	0.593692	2.11891	9.13802	0.00250352	0.0847622
chr9:13485839:13486628	899	651	857	439	225	424	0.486389	4.27756	9.1359	0.00250642	0.0847622
chr3:143659201:143660135	723	526	671	319	173	371	0.501681	3.94861	9.13545	0.00250704	0.0847622
chr8:114339621:114340524	823	470	967	367	173	372	0.646024	4.10789	9.1319	0.00251191	0.0848573
chr19:32356063:32356930	184	116	218	84	40	83	0.653741	2.02015	9.12825	0.00251693	0.0849161
chr17:47430636:47431763	1470	1347	1478	1392	768	1629	-0.460319	5.58463	9.12608	0.00251991	0.0849161
chr8:116960802:116960988	116	118	100	84	102	161	-0.743284	2.07472	9.12349	0.00252348	0.0849161
chr8:86280594:86280943	640	480	598	390	480	954	-0.772754	4.44176	9.12339	0.00252362	0.0849161
chr16:44671248:44671950	155	203	252	198	118	335	-0.717451	2.92292	9.12138	0.00252639	0.0849161
chr11:101758018:101758877	266	247	290	273	134	394	-0.614429	3.25523	9.12135	0.00252643	0.0849161
chr7:105232826:105233498	142	137	196	156	89	214	-0.598518	2.48286	9.1164	0.00253328	0.0849161
chr2:127299709:127300758	393	266	416	161	92	207	0.564423	3.08939	9.11605	0.00253376	0.0849161
chr17:45763643:45764143	288	254	321	138	74	168	0.532595	2.79833	9.1158	0.00253411	0.0849161
chr14:116178433:116179078	290	301	313	124	107	150	0.558734	2.86545	9.1157	0.00253426	0.0849161
chr14:42709216:42710184	227	171	264	215	115	351	-0.669707	2.99913	9.10623	0.00254741	0.0852875
chr10:18915920:18916416	73	67	108	124	41	97	-0.718292	1.62017	9.09972	0.00255648	0.0855217
chr16:57363158:57363559	184	86	184	69	31	70	0.747992	1.79988	9.09406	0.00256441	0.0856919
chr10:80886912:80888648	737	595	721	699	384	685	-0.445513	4.5062	9.09266	0.00256637	0.0856919
chr15:84550157:84551589	828	726	777	697	476	835	-0.45204	4.69882	9.09164	0.00256781	0.0856919
chr16:91826989:91827908	257	196	271	140	65	91	0.61553	2.51588	9.08117	0.00258255	0.0861142
chr13:83713085:83713700	191	211	221	213	118	249	-0.540683	2.851	9.07527	0.0025909	0.0862704
chr14:26352404:26353172	535	465	398	255	128	206	0.594943	3.47518	9.07382	0.00259294	0.0862704
chr9:63809665:63811147	126	145	214	184	101	182	-0.610539	2.51952	9.07099	0.00259697	0.0862704
chr1:133554538:133554942	149	93	161	61	23	74	0.705254	1.65393	9.06943	0.00259918	0.0862704
chr8:32709865:32710525	263	192	338	118	75	137	0.583971	2.64795	9.06915	0.00259958	0.0862704
chr12:86549626:86550199	159	124	113	124	91	168	-0.615011	2.24181	9.06839	0.00260066	0.0862704
chr13:108981398:108981822	122	109	135	46	38	64	0.62865	1.55904	9.06753	0.00260189	0.0862704
chr3:115749280:115750309	182	247	245	265	127	271	-0.60696	3.00833	9.05712	0.00261674	0.0866339
chr11:74847076:74847871	153	138	132	138	88	171	-0.56375	2.30772	9.0569	0.00261705	0.0866339
chr16:10979236:10980104	187	168	188	215	105	181	-0.540555	2.64867	9.05077	0.00262584	0.086855
chr7:19864104:19865548	198	305	252	358	205	227	-0.738863	3.25789	9.04901	0.00262837	0.086869
chr11:102641197:102642107	240	290	250	285	182	262	-0.569523	3.19969	9.04467	0.00263462	0.0870058
chr18:78547846:78548319	150	127	131	121	96	164	-0.574508	2.25931	9.03673	0.00264608	0.0873144
chr11:77454169:77454872	204	150	226	87	66	85	0.585742	2.21272	9.03085	0.0026546	0.0875158
chr3:52134163:52134760	269	228	273	126	80	133	0.511503	2.64761	9.02945	0.00265664	0.0875158
chr13:28965520:28966225	340	314	317	198	77	102	0.710709	2.91003	9.02813	0.00265856	0.0875158
chr8:26067566:26068508	600	454	766	290	180	320	0.523691	3.85444	9.02594	0.00266175	0.0875509
chr17:8309297:8310001	114	56	117	106	58	126	-0.683075	1.79614	9.01867	0.00267236	0.08783
chr11:105208959:105209422	193	151	157	93	43	69	0.628161	2.00094	9.01696	0.00267486	0.0878421
chr7:142800699:142802023	449	404	443	408	238	528	-0.500146	3.87912	9.01262	0.00268122	0.0879644
chr14:32797847:32798475	257	152	196	80	62	101	0.629963	2.25756	9.0115	0.00268286	0.0879644
chr15:39863536:39864197	292	233	388	152	74	161	0.579086	2.85099	9.00875	0.00268691	0.0880271
chr17:33965556:33966411	607	561	1004	328	194	378	0.598777	4.0769	9.00542	0.0026918	0.0881175
chr18:70212355:70213423	1438	1050	1219	661	406	538	0.518357	4.88937	8.99883	0.00270152	0.0883079
chr15:68035951:68036630	129	38	186	47	23	13	1.32632	1.26923	8.99857	0.0027019	0.0883079
chr4:10959928:10960412	130	92	167	69	29	54	0.68486	1.61133	8.99691	0.00270437	0.0883184
chr14:47343255:47343893	208	198	176	92	54	100	0.588234	2.23301	8.99425	0.00270831	0.0883771
chr17:45903406:45904781	1163	1346	1569	1252	826	1606	-0.509327	5.53902	8.98753	0.00271828	0.0886322
chr17:53794289:53794879	412	225	403	158	74	189	0.653801	3.00382	8.98198	0.00272655	0.0888315
chr13:43931605:43932361	349	256	237	145	80	120	0.620391	2.7394	8.97794	0.00273259	0.0889581
chr17:28649002:28650440	870	283	677	283	94	238	0.928602	3.70183	8.97114	0.00274278	0.089185
chr4:82145114:82145516	140	107	106	66	25	48	0.69418	1.48931	8.9704	0.00274389	0.089185
chr7:86973536:86975353	78	72	142	62	100	189	-0.977056	1.99345	8.96724	0.00274864	0.089269
chr17:43843908:43844765	410	285	377	209	96	123	0.646551	3.06113	8.95757	0.00276323	0.0896575
chr11:10335958:10336725	150	88	122	112	76	165	-0.634794	2.10304	8.95643	0.00276495	0.0896575
chr9:96437187:96437772	214	129	155	71	50	78	0.640855	1.98224	8.93839	0.00279239	0.0904762
chr19:17237830:17238381	198	157	239	104	44	102	0.595355	2.23998	8.93396	0.00279917	0.0906245
chr13:53237472:53238049	218	189	313	136	56	98	0.647292	2.49136	8.93133	0.00280321	0.0906839
chr10:114642187:114643066	332	276	304	274	166	549	-0.725951	3.50804	8.92987	0.00280544	0.0906849
chr2:164282148:164282795	149	100	166	155	96	134	-0.583727	2.2732	8.92674	0.00281026	0.090762
chr2:164347205:164347724	67	107	85	68	74	153	-0.838636	1.77717	8.92537	0.00281236	0.090762
chr13:63332933:63333505	171	163	190	85	48	92	0.558674	2.08719	8.92283	0.00281627	0.090762
chr1:173745957:173746358	154	99	148	54	43	63	0.633593	1.67756	8.92177	0.00281791	0.090762
chr12:81007727:81008344	142	145	154	164	76	183	-0.573618	2.37179	8.92117	0.00281883	0.090762
chrX:10480962:10481592	168	190	157	147	116	266	-0.676717	2.66559	8.91865	0.00282274	0.0908168
chr18:19592964:19593301	54	34	83	40	64	90	-0.92326	1.18365	8.90774	0.00283965	0.0912896
chr3:65634635:65635224	202	128	296	89	59	88	0.701935	2.26316	8.89967	0.00285222	0.0916223
chr15:73234188:73234833	144	161	130	169	97	151	-0.59571	2.37426	8.89606	0.00285786	0.091732
chr10:21459832:21460477	275	111	251	73	66	82	0.792681	2.25537	8.88663	0.00287266	0.0921353
chr19:27105610:27106123	83	73	99	98	38	133	-0.696385	1.65287	8.88448	0.00287606	0.0921724
chr18:12454083:12455122	616	444	637	298	173	290	0.480986	3.77686	8.88146	0.00288082	0.0922533
chr5:58105131:58105683	161	127	147	82	42	44	0.687966	1.78036	8.87485	0.00289125	0.0925156
chr11:100918165:100918771	180	158	170	87	46	84	0.567152	2.04206	8.86111	0.0029131	0.0931424
chr12:55975772:55976085	121	53	146	60	14	25	1.02602	1.22862	8.84174	0.00294418	0.094063
chr6:94095347:94096256	146	101	183	144	91	167	-0.581482	2.32042	8.83977	0.00294736	0.0940917
chr5:109152828:109153655	433	336	379	220	105	174	0.542155	3.20367	8.83511	0.00295491	0.0942597
chr18:84406211:84406889	261	179	202	103	72	83	0.618018	2.35117	8.82715	0.00296782	0.0945219
chr17:53651692:53652169	131	80	149	56	36	46	0.684561	1.50381	8.82683	0.00296834	0.0945219
chr4:95043919:95044692	273	175	351	140	56	122	0.669153	2.62263	8.8258	0.00297001	0.0945219
chr4:133911784:133912282	109	69	96	111	54	100	-0.614859	1.7021	8.8213	0.00297734	0.0946822
chr6:86782610:86783454	707	497	648	344	150	323	0.536554	3.88215	8.81838	0.00298211	0.0947411
chr4:69881385:69881947	210	71	215	80	34	32	1.04569	1.82187	8.81735	0.00298379	0.0947411
chr17:5138632:5139228	175	171	142	195	106	164	-0.587423	2.53225	8.81081	0.00299452	0.0948841
chr19:22902691:22903238	254	137	214	78	25	120	0.834156	2.1846	8.81051	0.002995	0.0948841
chr18:75725473:75726772	619	770	562	636	463	782	-0.60117	4.54878	8.81039	0.0029952	0.0948841
chr11:71322685:71323350	71	58	85	42	82	119	-0.91546	1.5133	8.80702	0.00300074	0.0949473
chr6:72502420:72503624	1365	1528	1534	1555	875	1476	-0.473636	5.64251	8.80387	0.00300592	0.0949473
chr4:102296691:102297234	109	112	182	189	62	183	-0.726937	2.32235	8.80331	0.00300684	0.0949473
chr7:4411617:4412820	335	351	513	506	227	410	-0.585425	3.80784	8.80241	0.00300832	0.0949473
chr10:8633546:8634133	89	80	122	111	43	166	-0.747624	1.87086	8.80127	0.00301022	0.0949473
chr7:121173019:121173609	502	271	403	213	102	155	0.64581	3.1868	8.80078	0.00301102	0.0949473
chr2:148686760:148688021	914	529	890	405	217	366	0.560299	4.19323	8.79581	0.00301923	0.0951335
chr4:33673303:33673951	250	186	264	132	67	90	0.594681	2.47504	8.79103	0.00302716	0.0953104
chr2:68249076:68250070	490	398	467	276	112	183	0.594193	3.41948	8.78781	0.00303249	0.0953478
chr11:115801050:115801463	107	104	137	53	32	57	0.622979	1.48859	8.78753	0.00303297	0.0953478
chr14:26702191:26703285	1350	888	1209	983	728	1377	-0.517759	5.28869	8.78347	0.00303972	0.0954872
chr11:118072062:118072930	409	520	505	464	299	562	-0.536035	4.05536	8.77837	0.00304823	0.0956815
chr10:60662315:60662742	134	124	197	78	30	76	0.656714	1.84421	8.77432	0.00305501	0.0958212
chr6:145556165:145556802	162	104	184	68	17	84	0.798291	1.7793	8.77104	0.00306051	0.0959011
chr3:145238888:145239629	349	264	344	178	98	130	0.553567	2.93632	8.7688	0.00306427	0.0959011
chr1:168807081:168807787	204	169	131	84	37	81	0.684024	1.9986	8.76864	0.00306453	0.0959011
chr1:92805491:92806732	631	559	465	585	318	667	-0.557289	4.27472	8.76628	0.00306851	0.0959204
chr2:83028735:83029404	95	43	95	52	113	109	-1.0411	1.68463	8.76551	0.00306981	0.0959204
chr17:74319515:74320324	691	563	627	320	182	362	0.469047	3.93851	8.7593	0.00308027	0.0961743
chr3:52131050:52133530	273	245	295	204	215	345	-0.607648	3.26525	8.75758	0.00308318	0.0961923
chr14:71035390:71035969	157	145	183	143	105	194	-0.536556	2.48089	8.75566	0.00308643	0.0962211
chr1:44258036:44258223	119	104	84	83	90	138	-0.705174	1.93079	8.74869	0.00309824	0.0964325
chr7:3331998:3332535	122	121	112	131	81	120	-0.571752	2.06297	8.74766	0.0031	0.0964325
chr7:74596039:74596938	474	569	490	511	301	641	-0.554418	4.16651	8.74752	0.00310023	0.0964325
chr6:147214048:147214791	127	156	177	176	84	184	-0.587808	2.4407	8.74564	0.00310344	0.0964593
chr7:54277623:54278509	861	912	794	941	494	916	-0.512293	4.88322	8.73741	0.00311746	0.0968223
chr12:86681969:86682529	195	179	232	101	64	95	0.541598	2.29628	8.73603	0.00311984	0.096823
chr4:63069678:63070073	128	97	149	48	24	77	0.681042	1.5622	8.72733	0.00313475	0.097081
chr16:94935219:94935738	215	161	250	117	44	100	0.611587	2.30732	8.72709	0.00313516	0.097081
chr6:136416821:136417879	924	564	947	333	290	345	0.597301	4.24077	8.72706	0.00313522	0.097081
chr1:94544268:94544685	148	113	175	68	43	69	0.594669	1.80738	8.72508	0.00313862	0.0971133
chr14:79548543:79549211	97	78	94	66	98	109	-0.761134	1.75645	8.72143	0.00314492	0.0972282
chr17:48476174:48476448	148	74	191	60	30	61	0.768891	1.65683	8.72019	0.00314705	0.0972282
chr5:45686282:45686924	149	203	230	186	128	246	-0.602012	2.78813	8.71733	0.003152	0.0973083
chr14:123850772:123850960	120	112	80	70	128	161	-0.931065	2.08591	8.71429	0.00315725	0.0973973
chr10:95381095:95381772	205	167	205	91	58	101	0.535609	2.22919	8.71081	0.00316328	0.0975104
chr1:135272301:135273991	161	157	268	192	135	222	-0.594158	2.77494	8.70487	0.0031736	0.0976908
chr16:87125700:87126746	647	824	705	784	452	789	-0.541177	4.66539	8.70472	0.00317387	0.0976908
chr18:61915242:61915937	238	198	250	122	65	114	0.522412	2.47725	8.70234	0.00317802	0.0977454
chr1:13283325:13283849	171	138	180	83	24	92	0.677979	1.94311	8.69769	0.00318613	0.0979027
chr1:116502237:116502925	76	56	99	39	114	137	-1.11235	1.72792	8.69669	0.00318788	0.0979027
chr13:112726574:112727032	69	74	70	62	54	95	-0.65481	1.37948	8.69456	0.00319162	0.0979031
chr5:68168973:68169669	205	131	293	91	56	97	0.673997	2.28065	8.69397	0.00319265	0.0979031
chr12:120348316:120349184	615	507	708	353	165	299	0.504451	3.87715	8.69017	0.00319931	0.0979781
chr15:55100065:55100458	183	102	150	76	36	60	0.665207	1.7782	8.68986	0.00319985	0.0979781
chr5:35901884:35902636	474	376	477	220	101	266	0.543441	3.40534	8.68629	0.00320612	0.0980343
chr2:144459762:144460898	529	355	601	228	153	259	0.526367	3.56217	8.68385	0.00321042	0.0980343
chr2:14216962:14217464	171	96	177	73	20	76	0.763175	1.76925	8.68258	0.00321265	0.0980343
chr9:58694751:58695749	309	231	286	226	179	361	-0.559199	3.25795	8.68233	0.0032131	0.0980343
chr2:163347883:163348830	79	71	90	48	88	131	-0.876258	1.66058	8.68206	0.00321358	0.0980343
chr7:25154722:25155589	247	217	192	224	136	245	-0.538269	2.92651	8.68028	0.00321672	0.0980575
chr5:139509641:139510165	91	121	143	153	71	127	-0.634276	2.09475	8.66985	0.00323518	0.0985475
chr11:5014771:5015325	246	187	332	108	76	133	0.584025	2.59728	8.66576	0.00324245	0.0986959
chr10:9257123:9257815	445	307	488	168	128	233	0.544247	3.30063	8.66376	0.00324601	0.098709
chr2:137821522:137822221	271	206	335	138	71	140	0.551426	2.69586	8.66283	0.00324767	0.098709
chr18:43073516:43073719	183	180	148	124	164	242	-0.753894	2.69351	8.65832	0.00325572	0.0988319
chr8:3299284:3299845	131	67	180	60	25	50	0.805526	1.52167	8.65516	0.00326137	0.0988319
chr15:84039951:84041064	616	529	633	315	182	330	0.441771	3.86734	8.65422	0.00326305	0.0988319
chr10:87853118:87853922	176	140	133	165	84	179	-0.57369	2.39805	8.65408	0.0032633	0.0988319
chr6:85103967:85104453	236	160	234	108	60	100	0.557142	2.33821	8.65278	0.00326563	0.0988319
chr15:76988790:76989303	53	64	68	83	24	105	-0.789899	1.26502	8.65243	0.00326626	0.0988319
chr9:6616676:6617423	174	114	198	77	36	86	0.627508	1.94203	8.65118	0.0032685	0.0988319
chr7:82799947:82800950	348	308	346	182	106	156	0.500886	3.02847	8.64673	0.00327649	0.0989526
chr16:56920251:56920744	147	102	177	72	33	68	0.632606	1.75657	8.64628	0.00327729	0.0989526
chr1:64087368:64088079	255	166	320	96	64	139	0.634289	2.53006	8.63839	0.00329151	0.0993093
chr14:20724611:20725416	677	517	872	364	181	358	0.531009	4.03257	8.63134	0.00330428	0.0996214
chr7:144492897:144493369	139	135	180	55	45	86	0.613993	1.86308	8.62927	0.00330804	0.099662
chr11:118261227:118262463	485	522	513	468	316	556	-0.47879	4.10344	8.62218	0.00332093	0.0999773
chr3:122212042:122212360	194	132	177	73	58	75	0.591168	2.01332	8.61657	0.00333118	0.100166
chr14:22409024:22409636	104	131	136	69	29	50	0.67409	1.56952	8.61551	0.00333312	0.100166
chr7:3275320:3276445	960	880	814	872	541	915	-0.470602	4.90249	8.61476	0.00333449	0.100166
chr1:43771606:43772276	221	162	285	106	63	110	0.578443	2.40781	8.61043	0.00334244	0.100332
chr19:36207912:36208721	392	339	374	176	87	226	0.543819	3.15001	8.604	0.00335426	0.100613
chr1:37695992:37696283	142	79	131	57	34	45	0.679642	1.47647	8.60011	0.00336142	0.100755
chrX:166650127:166650353	974	770	773	554	760	1391	-0.796211	5.01607	8.59805	0.00336523	0.100795
chr9:15313726:15314219	134	107	90	65	23	36	0.768103	1.38135	8.59465	0.00337151	0.10091
chr6:72494085:72494958	335	400	285	415	228	353	-0.612413	3.61904	8.59279	0.00337496	0.10094
chr1:166558647:166559528	542	508	520	262	136	313	0.507369	3.66922	8.5832	0.00339279	0.10139
chr1:95447787:95448372	111	108	125	100	72	158	-0.59539	2.02476	8.58205	0.00339492	0.10139
chr18:55310452:55311051	158	62	162	72	18	25	1.05987	1.46348	8.579	0.00340062	0.101452
chr13:114659428:114659908	162	169	149	74	40	88	0.605261	1.95634	8.57778	0.00340291	0.101452
chr16:34909014:34910005	525	185	479	191	78	145	0.845468	3.11477	8.57698	0.00340439	0.101452
chr9:56862475:56863125	334	178	470	160	53	143	0.815934	2.85511	8.57566	0.00340687	0.101453
chr13:23689734:23690142	116	93	136	49	19	70	0.683913	1.45038	8.57228	0.00341319	0.101568
chr5:35531599:35532198	297	229	636	156	80	176	0.819183	3.08963	8.5683	0.00342067	0.101717
chr6:91978004:91978926	160	148	137	194	93	140	-0.597258	2.40145	8.56543	0.00342606	0.101794
chr7:146549649:146550472	485	261	430	200	107	179	0.59493	3.20259	8.56427	0.00342825	0.101794
chr19:37152313:37152877	212	144	170	83	53	84	0.580991	2.08191	8.5614	0.00343366	0.101794
chr2:151907347:151907942	266	159	283	125	56	110	0.615683	2.4743	8.56135	0.00343374	0.101794
chr14:67435615:67436250	125	109	122	57	26	65	0.617133	1.52393	8.55941	0.00343741	0.101794
chr19:23462667:23463399	167	102	143	60	37	71	0.62186	1.71911	8.55835	0.00343942	0.101794
chr7:118007752:118008728	338	195	330	161	72	115	0.634969	2.74856	8.55774	0.00344057	0.101794
chr8:67404613:67405170	182	65	127	60	23	47	0.856247	1.49838	8.55086	0.00345359	0.102106
chr10:17558173:17559146	798	514	737	305	159	418	0.576806	4.00722	8.54587	0.00346306	0.102178
chr17:46217403:46219116	1058	1040	1043	1099	566	1112	-0.462482	5.13893	8.54533	0.00346409	0.102178
chr1:153584056:153584963	608	370	673	256	143	302	0.568136	3.69354	8.54431	0.00346604	0.102178
chr17:37340529:37340994	223	166	231	109	60	98	0.541067	2.32386	8.54314	0.00346827	0.102178
chr10:95161822:95162406	151	113	164	61	49	65	0.595356	1.78434	8.54306	0.00346841	0.102178
chr2:152635808:152636288	249	185	208	128	44	93	0.637341	2.34388	8.5407	0.00347292	0.102238
chr9:49409580:49410307	207	154	273	120	53	79	0.652467	2.30731	8.53516	0.00348351	0.102469
chr1:190030826:190031831	251	212	296	121	92	96	0.58379	2.59618	8.53307	0.00348751	0.102469
chr11:119562835:119563385	68	48	75	36	86	99	-0.980119	1.37849	8.53269	0.00348825	0.102469
chr7:128228893:128229381	130	103	231	77	41	46	0.79156	1.81562	8.52765	0.00349792	0.102664
chr5:46826940:46827133	148	122	98	97	114	164	-0.725535	2.20124	8.52665	0.00349984	0.102664
chr19:6299403:6300065	146	111	207	187	77	200	-0.642115	2.46571	8.52044	0.0035118	0.102941
chr1:82644467:82645159	262	190	310	140	63	120	0.57353	2.59727	8.5179	0.00351671	0.102991
chr16:33744624:33745740	127	105	93	139	80	98	-0.641006	1.97402	8.51698	0.00351849	0.102991
chr17:71273980:71274623	475	310	432	180	127	223	0.518712	3.28772	8.50967	0.00353264	0.103332
chr3:115411428:115412896	2033	1746	2293	1957	1125	1976	-0.402664	6.04346	8.50635	0.0035391	0.103444
chr16:90443874:90444419	62	62	80	92	25	117	-0.791314	1.39915	8.50503	0.00354166	0.103444
chr4:47374193:47374946	178	174	204	95	54	92	0.540086	2.17814	8.50195	0.00354766	0.103444
chr1:89188853:89189741	233	116	225	103	47	66	0.721824	2.13903	8.501	0.00354952	0.103444
chr10:14385982:14386483	155	90	155	73	34	48	0.684168	1.65131	8.50035	0.00355078	0.103444
chr13:42402706:42405557	1094	686	782	385	282	416	0.550111	4.34507	8.49997	0.00355153	0.103444
chr1:172479064:172479620	187	120	136	75	41	63	0.634347	1.82224	8.4985	0.00355439	0.103454
chr3:95099911:95100513	165	150	177	73	42	96	0.567248	1.99408	8.49418	0.00356284	0.103588
chr5:67998812:67999685	137	85	138	62	20	61	0.686231	1.50482	8.49334	0.0035645	0.103588
chr1:168932126:168933115	419	249	450	188	100	182	0.573492	3.13648	8.49228	0.00356656	0.103588
chr15:42506304:42506799	259	192	238	125	57	118	0.545927	2.47331	8.48953	0.00357196	0.103672
chr9:21591390:21591827	164	115	184	78	37	78	0.597804	1.88733	8.48712	0.0035767	0.103737
chr1:161990113:161991246	829	819	915	887	480	837	-0.438541	4.82782	8.4857	0.00357948	0.103745
chr1:128824693:128825220	198	127	227	100	49	72	0.636196	2.11749	8.48257	0.00358566	0.10385
chr4:45681300:45682054	72	58	98	55	96	91	-0.862653	1.56199	8.47899	0.00359272	0.103982
chr10:38853371:38854180	640	432	646	274	159	332	0.504529	3.78256	8.47622	0.00359819	0.104067
chr5:49683619:49684034	140	96	132	55	40	54	0.615097	1.56705	8.47262	0.00360533	0.10411
chr13:36333758:36334570	252	226	227	120	78	104	0.544262	2.51716	8.47174	0.00360705	0.10411
chr9:21552357:21553129	184	149	186	169	95	210	-0.520698	2.56785	8.47165	0.00360724	0.10411
chr15:78665817:78667171	296	271	318	269	160	405	-0.550101	3.35661	8.46445	0.00362154	0.104449
chr13:13664702:13665459	62	112	87	168	61	81	-0.878709	1.81913	8.45865	0.00363312	0.10471
chr3:97463328:97464253	511	310	401	168	144	185	0.585831	3.26958	8.45552	0.00363937	0.104817
chr11:48740354:48740946	219	225	155	102	57	78	0.679576	2.25046	8.45226	0.0036459	0.104899
chr6:147759142:147759547	156	151	177	84	43	81	0.558738	1.9753	8.45095	0.00364852	0.104899
chr14:35214214:35214672	182	117	171	80	37	79	0.600521	1.90927	8.45028	0.00364986	0.104899
chrX:11580716:11584768	2152	2119	2038	1875	1254	2420	-0.466412	6.14917	8.44833	0.00365379	0.104939
chr7:56400801:56402038	917	547	991	423	219	406	0.554886	4.26594	8.44586	0.00365876	0.105009
chr6:86725982:86726517	277	90	233	105	24	61	1.01713	2.10247	8.44129	0.00366795	0.105199
chr4:130346107:130346462	144	136	185	71	43	83	0.571795	1.91006	8.43947	0.00367164	0.105228
chr9:71654170:71654554	158	148	214	90	45	85	0.576117	2.06325	8.4379	0.0036748	0.105228
chr4:148449912:148450611	261	218	318	123	64	159	0.554135	2.67227	8.437	0.00367663	0.105228
chr13:13876066:13876677	97	91	121	147	74	84	-0.665263	1.90546	8.42962	0.00369157	0.10555
chr5:144533988:144534591	222	151	214	188	133	199	-0.515165	2.73689	8.42892	0.00369301	0.10555
chr12:81206966:81207999	141	123	158	104	111	191	-0.634506	2.33463	8.42713	0.00369663	0.105581
chr19:22628673:22629576	556	433	805	251	172	329	0.571974	3.81151	8.41961	0.00371195	0.105887
chr4:40823804:40824500	237	211	217	118	61	113	0.531966	2.43649	8.41935	0.00371248	0.105887
chr9:8927508:8927970	127	74	123	48	35	42	0.673264	1.36462	8.41576	0.00371981	0.106022
chr3:21973591:21974252	280	249	266	138	63	151	0.537416	2.68548	8.41286	0.00372576	0.106118
chr1:108213078:108214044	297	282	374	158	101	165	0.492617	2.95533	8.41143	0.0037287	0.106129
chr1:90938674:90939780	195	159	176	191	105	180	-0.507645	2.59456	8.40632	0.0037392	0.106252
chr16:84972093:84972670	110	93	143	133	56	150	-0.609206	2.03235	8.40499	0.00374193	0.106252
chr3:59724000:59724186	101	86	84	54	104	146	-0.891585	1.84981	8.40496	0.00374198	0.106252
chr6:33879657:33880224	194	133	268	105	48	83	0.656236	2.21222	8.40431	0.00374333	0.106252
chr7:87805206:87805969	420	225	381	182	78	161	0.625834	2.9964	8.40079	0.00375058	0.106309
chr17:35561145:35563334	4050	3481	4808	3411	2700	4319	-0.45159	7.0923	8.39971	0.00375282	0.106309
chr17:37322308:37322844	192	211	169	96	47	98	0.610315	2.20563	8.39958	0.00375308	0.106309
chr4:152397775:152398194	66	28	95	83	34	101	-0.858021	1.29782	8.39231	0.00376813	0.106662
chr5:33966091:33966797	139	190	137	86	20	70	0.821813	1.85599	8.37975	0.00379425	0.107327
chr14:6093057:6094068	231	188	282	97	53	146	0.597822	2.4738	8.37773	0.00379847	0.107359
chr6:67120219:67120746	410	362	449	176	149	209	0.496495	3.30929	8.37672	0.00380058	0.107359
chr6:16989055:16989532	69	67	95	62	76	89	-0.697499	1.50303	8.37442	0.00380539	0.107377
chr5:110503431:110503630	104	80	44	55	80	150	-0.993513	1.68317	8.37365	0.003807	0.107377
chr17:31964048:31964909	389	299	408	415	178	424	-0.527672	3.64443	8.37073	0.00381313	0.107377
chr17:35322951:35323442	111	118	81	108	89	109	-0.665825	1.92926	8.36993	0.0038148	0.107377
chr1:79960525:79961384	51	60	113	56	88	104	-0.901482	1.56096	8.3682	0.00381844	0.107377
chr8:113235112:113235881	263	230	314	280	145	292	-0.484649	3.1798	8.3682	0.00381845	0.107377
chr17:47736781:47737407	113	112	126	107	75	143	-0.552223	2.03008	8.36565	0.0038238	0.107377
chr5:4961983:4962390	159	86	138	75	22	48	0.749501	1.57098	8.36474	0.00382571	0.107377
chr15:73679898:73680538	40	49	102	109	29	96	-0.910815	1.36368	8.36425	0.00382675	0.107377
chr13:59943575:59944549	243	197	235	222	151	215	-0.486095	2.92846	8.36394	0.0038274	0.107377
chr18:73870720:73871099	90	58	80	90	37	102	-0.646184	1.45975	8.36276	0.00382988	0.107377
chr6:125430340:125432917	1597	1479	1702	1465	906	1594	-0.394884	5.6995	8.36018	0.00383532	0.107457
chr2:83790996:83791456	74	45	85	44	75	102	-0.856619	1.40153	8.35322	0.00385005	0.107796
chr12:34064715:34065344	345	264	351	164	88	180	0.49288	2.96217	8.35191	0.00385282	0.107801
chr10:92019086:92019984	416	325	350	198	118	147	0.551479	3.13	8.35062	0.00385557	0.107804
chr15:38939330:38940241	369	328	443	200	103	213	0.488338	3.20937	8.34744	0.00386232	0.107809
chr10:120111528:120112160	152	143	171	137	96	194	-0.535101	2.42445	8.34545	0.00386654	0.107809
chr16:35034236:35034826	178	98	173	69	47	60	0.648577	1.82425	8.34488	0.00386776	0.107809
chr5:150418476:150419088	91	65	84	113	31	117	-0.728221	1.5877	8.34473	0.00386807	0.107809
chr7:116282917:116283265	217	117	175	77	37	92	0.650239	2.00209	8.34366	0.00387036	0.107809
chr9:45719765:45720094	123	110	146	72	37	39	0.670072	1.59136	8.34316	0.00387142	0.107809
chr18:70747498:70747920	139	118	111	54	31	67	0.622749	1.57362	8.34004	0.00387807	0.107921
chr19:17407417:17408238	148	122	168	80	39	65	0.581701	1.82135	8.33205	0.00389518	0.108324
chr7:78167149:78167666	117	102	103	65	19	44	0.692343	1.36284	8.32691	0.00390621	0.108557
chr8:74805474:74805865	61	61	79	82	31	92	-0.660501	1.29368	8.32431	0.0039118	0.108604
chr6:124643386:124645009	758	556	687	405	166	295	0.558503	3.98696	8.32368	0.00391317	0.108604
chr4:55684935:55685694	265	195	334	222	165	376	-0.608666	3.2191	8.32009	0.00392089	0.108745
chr17:37578924:37579443	78	60	90	47	101	103	-0.917667	1.59564	8.31094	0.00394069	0.109221
chr13:108482284:108482817	77	87	104	104	55	96	-0.589084	1.66434	8.30131	0.00396166	0.109678
chr14:121979848:121980461	128	94	141	136	55	176	-0.641013	2.12069	8.30092	0.00396251	0.109678
chr10:97937806:97938258	57	72	96	77	55	87	-0.638184	1.43993	8.29798	0.00396893	0.109782
chr3:82884456:82884949	121	106	134	53	30	68	0.598118	1.54742	8.29553	0.00397427	0.109804
chr7:136457516:136458000	73	94	87	83	57	107	-0.615657	1.61132	8.29518	0.00397504	0.109804
chr4:41924856:41926245	633	335	545	394	476	603	-0.711155	4.20563	8.28613	0.00399491	0.110279
chr10:122620304:122620686	191	146	248	103	35	102	0.646628	2.19731	8.28155	0.004005	0.110419
chr10:94055109:94055345	214	165	172	122	177	272	-0.763991	2.79711	8.28139	0.00400535	0.110419
chr5:65092467:65093681	1241	1140	1313	1156	659	1350	-0.424695	5.34495	8.27857	0.00401157	0.110517
chr2:160423578:160423976	170	130	159	78	35	83	0.576813	1.89006	8.27676	0.00401558	0.110553
chr1:194277850:194278067	303	247	282	186	260	387	-0.72049	3.36421	8.26717	0.00403683	0.111064
chr7:135933424:135934015	128	73	133	49	13	64	0.780113	1.3694	8.26114	0.00405028	0.111292
chr7:70968723:70969409	270	219	287	149	68	124	0.526603	2.64842	8.26104	0.0040505	0.111292
chr16:15992131:15992469	130	127	96	67	19	52	0.738107	1.48582	8.25926	0.00405446	0.111326
chr14:117782580:117783790	510	517	655	276	195	279	0.477088	3.77448	8.25802	0.00405724	0.111328
chr6:31452368:31453041	190	75	172	83	19	43	0.943495	1.6863	8.25056	0.00407395	0.111528
chr17:58754429:58755191	615	538	646	314	170	355	0.450259	3.8803	8.24965	0.00407598	0.111528
chr4:150530971:150531467	130	101	143	59	19	74	0.668406	1.56857	8.24923	0.00407692	0.111528
chr13:81247257:81248301	431	326	551	199	139	228	0.517818	3.3856	8.24839	0.00407882	0.111528
chr6:100638177:100638723	199	169	207	85	56	110	0.530497	2.22617	8.24804	0.0040796	0.111528
chr2:134307472:134307815	128	70	124	62	18	42	0.744894	1.32949	8.24668	0.00408265	0.111528
chr13:31797286:31797729	141	122	147	64	49	55	0.592895	1.73183	8.24633	0.00408345	0.111528
chr5:54352226:54354104	867	974	1068	900	543	1198	-0.499539	5.0482	8.23986	0.00409804	0.111852
chr10:44581339:44581814	128	72	174	55	25	61	0.737276	1.53139	8.23818	0.00410182	0.111881
chr11:116476595:116478301	1040	1412	1543	1202	808	2001	-0.634447	5.58888	8.2354	0.0041081	0.111978
chr9:123337955:123338498	134	81	153	57	21	67	0.69488	1.52893	8.2267	0.00412784	0.112442
chr1:60245201:60245705	158	172	161	84	42	84	0.577955	1.99668	8.22287	0.00413657	0.112605
chrX:48760328:48760946	200	159	248	95	41	120	0.604307	2.26671	8.2215	0.0041397	0.112616
chrX:132419922:132420921	270	206	270	107	85	132	0.515992	2.59803	8.21904	0.0041453	0.11263
chr14:67595664:67596417	469	447	349	408	260	532	-0.563079	3.89369	8.21888	0.00414568	0.11263
chr15:66964538:66965228	153	152	200	178	84	221	-0.569215	2.55745	8.21732	0.00414925	0.112653
chr15:99327550:99329689	1154	993	1309	1094	601	1319	-0.448815	5.2567	8.21514	0.00415423	0.112659
chr2:72904331:72904859	70	45	115	83	45	115	-0.741339	1.51141	8.21483	0.00415495	0.112659
chr2:84269922:84270328	122	121	133	57	25	75	0.62269	1.60006	8.21185	0.00416177	0.112712
chr4:55384497:55385303	205	180	85	58	42	64	0.862395	1.85457	8.21057	0.0041647	0.112712
chr6:64876420:64877058	67	64	115	59	118	96	-0.960553	1.72091	8.20995	0.00416612	0.112712
chr17:34432734:34433704	864	631	974	822	418	1044	-0.527792	4.81014	8.2092	0.00416785	0.112712
chr5:39029341:39029911	194	166	182	89	55	92	0.531067	2.14651	8.20749	0.00417178	0.112745
chr14:13370133:13370321	136	103	76	70	116	174	-0.901858	2.08069	8.20276	0.00418266	0.112965
chr6:36354912:36355777	399	270	519	215	89	188	0.613272	3.20652	8.19659	0.00419692	0.113276
chr7:108249619:108250447	410	533	491	477	304	528	-0.522053	4.04964	8.19257	0.00420624	0.113453
chrX:15513450:15514385	73	58	133	47	117	166	-1.09038	1.90334	8.19125	0.0042093	0.113461
chr7:91166753:91167631	213	117	202	161	131	199	-0.588145	2.62837	8.18566	0.00422227	0.113704
chr11:60173946:60174784	186	176	247	178	121	267	-0.552322	2.81367	8.18479	0.00422431	0.113704
chr11:43649678:43650203	261	128	263	105	58	93	0.657686	2.33843	8.18333	0.00422771	0.113704
chr4:123090824:123091486	104	169	131	182	66	206	-0.752387	2.3745	8.18262	0.00422936	0.113704
chr9:115259876:115260119	171	123	131	80	152	262	-0.92724	2.52016	8.17967	0.00423625	0.113719
chr15:97548033:97548851	330	259	309	145	84	175	0.495515	2.87011	8.1796	0.0042364	0.113719
chr13:113320050:113320609	275	173	323	121	65	137	0.585417	2.60452	8.17808	0.00423996	0.113719
chr13:113256315:113257159	112	108	100	116	57	135	-0.58098	1.91933	8.17767	0.00424093	0.113719
chr6:73172728:73173498	355	242	340	167	99	138	0.526289	2.91342	8.17311	0.00425161	0.113838
chr11:119794239:119795418	1631	1410	1467	1284	954	1603	-0.443564	5.64618	8.17248	0.00425307	0.113838
chr17:23707035:23707294	146	110	75	42	21	61	0.7911	1.37851	8.17223	0.00425365	0.113838
chr2:28956166:28956757	231	179	218	106	60	111	0.515852	2.35521	8.17	0.00425889	0.113857
chr11:121843606:121843912	748	593	554	405	640	993	-0.820778	4.62278	8.16826	0.00426297	0.113857
chr1:166082721:166083466	83	132	123	118	76	140	-0.633688	2.03355	8.16775	0.00426417	0.113857
chr10:20685907:20686213	156	159	169	83	33	91	0.592434	1.96585	8.16617	0.00426789	0.113857
chr8:108715512:108716013	81	116	102	104	55	152	-0.674124	1.88473	8.16376	0.00427356	0.113857
chr11:69212767:69213956	143	175	233	163	132	222	-0.589569	2.6944	8.16371	0.00427367	0.113857
chr13:36177722:36178178	149	101	108	57	30	59	0.633371	1.52631	8.16369	0.00427372	0.113857
chr6:88865363:88865938	232	150	168	103	39	84	0.638503	2.1242	8.15831	0.00428643	0.114076
chr6:50630405:50631168	224	179	201	227	107	216	-0.512144	2.78416	8.15705	0.0042894	0.114076
chr2:14263215:14264034	242	115	209	94	56	56	0.741103	2.11373	8.15624	0.00429132	0.114076
chr9:48552469:48554169	842	284	752	304	95	247	0.896409	3.7467	8.15552	0.00429302	0.114076
chr5:115100590:115101891	604	569	760	643	345	693	-0.451402	4.42079	8.15092	0.00430393	0.114293
chr9:62712965:62713784	95	84	108	58	114	137	-0.859422	1.90224	8.14874	0.00430912	0.114332
chr9:96575842:96576279	198	139	217	104	53	69	0.607254	2.13762	8.14796	0.00431096	0.114332
chr15:35933858:35934478	130	195	150	78	43	69	0.674431	1.92787	8.14538	0.00431711	0.114421
chr16:30829554:30829759	113	92	71	59	94	162	-0.881269	1.88043	8.13896	0.00433242	0.114753
chr13:81490473:81491219	226	264	323	308	157	279	-0.527202	3.22189	8.13616	0.00433911	0.114857
chr12:113154617:113155176	108	76	119	88	63	140	-0.606905	1.83888	8.12622	0.00436295	0.115414
chr11:78344201:78345221	358	356	422	381	202	418	-0.46433	3.66702	8.12064	0.0043764	0.115695
chr1:72475570:72476141	350	313	378	199	110	124	0.576523	3.05146	8.11499	0.00439008	0.11597
chr13:67500244:67500934	683	680	683	613	419	721	-0.441849	4.50911	8.11402	0.00439242	0.11597
chr11:88460160:88461315	491	671	751	564	430	815	-0.580558	4.49238	8.11248	0.00439615	0.115994
chr6:86976922:86977332	162	108	165	156	108	131	-0.564825	2.33188	8.10872	0.00440529	0.116087
chr15:51992094:51992607	188	105	165	66	42	79	0.614752	1.86611	8.10872	0.00440529	0.116087
chr2:103114916:103115683	203	243	308	190	201	345	-0.65557	3.1856	8.10739	0.00440851	0.116097
chr10:33790697:33791388	289	215	224	141	62	105	0.586065	2.54238	8.10482	0.00441478	0.116188
chr6:86138737:86139540	185	187	219	183	153	189	-0.53177	2.76547	8.10359	0.00441776	0.116193
chr9:20818683:20822213	1879	1988	1950	1780	1151	2069	-0.437739	6.01592	8.09984	0.00442693	0.116359
chr2:103558998:103559382	126	88	124	39	28	69	0.650229	1.43417	8.09712	0.00443355	0.116459
chr4:116818758:116819112	158	149	196	56	49	102	0.61136	2.00778	8.09172	0.0044468	0.116618
chr16:92396200:92397365	132	113	163	47	30	88	0.656981	1.69467	8.08961	0.00445197	0.116618
chr9:83433521:83434153	165	88	141	63	42	46	0.677548	1.63428	8.08936	0.00445259	0.116618
chr5:134957792:134958409	89	76	143	118	45	188	-0.796596	1.9768	8.08789	0.00445621	0.116618
chr4:8450449:8450986	178	141	188	174	119	155	-0.51493	2.52978	8.08458	0.00446435	0.116618
chr11:115829923:115830840	401	376	351	346	211	503	-0.542016	3.70995	8.08394	0.00446592	0.116618
chr15:35945598:35946398	329	226	284	158	74	133	0.53998	2.75391	8.08394	0.00446593	0.116618
chr14:70702734:70703254	124	139	103	175	66	136	-0.662291	2.17009	8.08362	0.00446672	0.116618
chr3:145560484:145561089	366	289	376	177	89	201	0.492868	3.06436	8.08317	0.00446782	0.116618
chr2:92193908:92195239	498	326	697	239	74	269	0.769853	3.49893	8.08314	0.0044679	0.116618
chr16:56610469:56611051	209	125	225	113	40	50	0.783893	2.08458	8.07691	0.00448328	0.116945
chr5:115342935:115343443	91	46	84	55	67	104	-0.745894	1.45755	8.0748	0.00448851	0.117008
chr3:100120275:100120505	85	68	64	45	72	122	-0.834627	1.50189	8.07345	0.00449186	0.117021
chr3:37833782:37834524	58	33	116	112	35	103	-0.917266	1.46311	8.07215	0.00449508	0.117031
chr19:7094768:7095142	104	106	134	59	21	62	0.636286	1.46767	8.0678	0.00450588	0.117236
chr10:40241343:40241762	121	144	102	61	32	54	0.673087	1.56552	8.06669	0.00450863	0.117236
chr11:97923182:97923771	191	141	184	182	114	161	-0.509498	2.55184	8.06472	0.00451355	0.11729
chr8:96704933:96707558	1017	811	743	517	220	316	0.636136	4.32746	8.06217	0.00451991	0.117381
chr13:113049488:113049954	247	202	201	120	54	108	0.557887	2.3944	8.05834	0.00452946	0.117555
chr10:56721133:56721492	124	108	148	63	38	58	0.579287	1.62511	8.05592	0.00453552	0.117584
chr4:112698506:112699443	79	55	136	73	91	116	-0.799877	1.76218	8.05561	0.00453629	0.117584
chr12:106203154:106203960	269	259	337	249	161	433	-0.597948	3.34909	8.05379	0.00454086	0.117629
chr17:47930236:47930739	206	124	211	87	55	81	0.586854	2.10839	8.04901	0.00455286	0.117837
chr12:85590179:85590494	152	106	168	78	32	67	0.605563	1.76828	8.0483	0.00455463	0.117837
chr5:152489187:152489725	172	191	157	80	38	101	0.622815	2.0661	8.04707	0.00455772	0.117843
chr16:10332451:10333487	622	630	721	597	400	667	-0.425331	4.44271	8.0422	0.00457	0.118087
chr11:86629386:86629951	105	66	114	87	71	108	-0.596213	1.74186	8.03553	0.00458687	0.118448
chr8:122858683:122860156	359	327	395	273	271	433	-0.549983	3.6428	8.03164	0.00459673	0.118628
chr3:58009846:58010653	222	123	157	90	47	57	0.683998	1.97575	8.02909	0.00460319	0.118721
chr14:26981619:26982668	1373	931	1150	988	698	1378	-0.493743	5.28138	8.02678	0.00460906	0.11875
chr14:76998357:76999042	163	151	128	90	33	52	0.692389	1.81131	8.02597	0.00461114	0.11875
chr19:6576795:6577433	168	104	178	74	28	82	0.643152	1.82909	8.0244	0.00461512	0.11875
chr14:25319659:25320189	185	124	190	86	41	85	0.57111	2.00279	8.02412	0.00461585	0.11875
chr18:50225024:50226166	423	359	411	352	234	439	-0.444629	3.7261	8.02069	0.00462459	0.118901
chr4:132654705:132655360	103	75	113	96	88	88	-0.62814	1.79139	8.01722	0.00463345	0.118985
chr2:11981304:11981754	129	59	124	55	15	45	0.789955	1.26797	8.01715	0.00463364	0.118985
chr2:92008199:92008390	152	107	130	96	114	163	-0.650738	2.22485	8.01382	0.00464217	0.119025
chr1:187837376:187838796	1123	843	1141	564	325	569	0.421567	4.67014	8.01331	0.00464349	0.119025
chr13:38389651:38390402	120	127	166	199	54	203	-0.734593	2.37311	8.01316	0.00464386	0.119025
chr1:154801031:154802696	767	941	1023	924	579	900	-0.484418	4.94978	8.0092	0.00465402	0.119138
chr15:59228808:59229236	144	114	179	76	30	77	0.604392	1.80492	8.00919	0.00465405	0.119138
chr2:90972126:90972927	308	250	206	152	49	105	0.700125	2.57889	8.00503	0.00466477	0.119338
chr3:27886369:27887365	211	202	209	207	113	241	-0.495663	2.82165	8.00201	0.00467254	0.119423
chr13:87227603:87228183	76	38	90	40	90	107	-0.998522	1.47034	8.00131	0.00467434	0.119423
chrX:131618710:131619360	343	228	332	165	94	122	0.553623	2.84909	8.00038	0.00467676	0.119423
chr10:18194958:18195382	177	155	178	77	60	81	0.53988	2.05818	7.99612	0.00468778	0.119501
chr3:57305499:57306056	248	201	179	207	131	239	-0.534864	2.86045	7.99598	0.00468814	0.119501
chr17:41444859:41445542	95	62	89	60	77	105	-0.694094	1.58786	7.99583	0.00468852	0.119501
chr12:88757538:88757954	181	123	163	75	47	76	0.560125	1.91923	7.99401	0.00469323	0.119547
chr7:71003268:71004113	724	629	678	380	194	374	0.450436	4.05793	7.98803	0.00470877	0.119861
chr2:20834136:20834716	208	193	166	87	42	112	0.606315	2.18996	7.98702	0.00471138	0.119861
chr5:121986999:121987669	137	128	181	81	39	68	0.579186	1.84759	7.98404	0.00471916	0.119973
chr2:72108521:72109045	55	39	82	40	55	94	-0.81326	1.17039	7.98228	0.00472375	0.119973
chr3:148303342:148304055	415	149	439	158	70	124	0.823012	2.87802	7.98157	0.00472559	0.119973
chr5:136103928:136105126	547	304	525	484	272	491	-0.534658	3.96519	7.9808	0.0047276	0.119973
chr3:52261905:52263085	638	441	574	289	166	299	0.464525	3.74856	7.97929	0.00473154	0.119973
chr5:30940383:30940757	177	97	162	72	43	59	0.632527	1.78989	7.97864	0.00473326	0.119973
chr3:122387561:122388170	510	336	455	227	146	177	0.540689	3.37556	7.97597	0.00474025	0.120021
chr11:82379426:82379942	95	57	97	83	48	110	-0.614532	1.56093	7.9757	0.00474095	0.120021
chr2:58149299:58149950	257	197	536	144	59	155	0.81105	2.8674	7.97137	0.00475228	0.120141
chr16:35117196:35117874	538	186	456	216	55	117	0.959631	3.06993	7.97103	0.00475319	0.120141
chr10:21574916:21575577	296	241	313	331	128	361	-0.567209	3.30461	7.97056	0.00475444	0.120141
chr18:74908536:74909218	85	60	87	52	66	120	-0.730094	1.52708	7.96802	0.0047611	0.120177
chr4:33329106:33329964	123	142	151	137	80	170	-0.543063	2.27185	7.9678	0.00476169	0.120177
chr9:63836690:63838295	560	564	715	661	321	647	-0.470436	4.36264	7.96574	0.0047671	0.120239
chr13:41755372:41756250	604	323	569	229	137	266	0.566705	3.55379	7.96135	0.00477867	0.120397
chr5:66329209:66329574	175	140	178	100	37	70	0.598767	1.98275	7.96115	0.0047792	0.120397
chr16:10298079:10298646	109	110	129	113	76	126	-0.527434	2.00321	7.95856	0.00478604	0.120447
chr1:170173917:170174398	151	45	190	31	37	44	1.01656	1.47326	7.95648	0.00479155	0.120447
chr8:123947743:123949078	989	1314	1137	1074	763	1326	-0.534161	5.32253	7.95594	0.00479298	0.120447
chr14:76219735:76220336	273	241	299	137	87	143	0.474066	2.73844	7.95518	0.00479499	0.120447
chr11:71837817:71838239	157	128	122	66	27	77	0.626377	1.71196	7.95398	0.00479818	0.120447
chr14:24701209:24701789	170	34	130	55	11	23	1.24765	1.22588	7.95377	0.00479873	0.120447
chr1:129723852:129724366	116	116	128	42	32	74	0.625601	1.53985	7.94974	0.00480943	0.120576
chrX:91881197:91881878	184	170	255	90	66	103	0.546784	2.29655	7.94831	0.00481323	0.120576
chrX:68507819:68508650	354	212	372	168	54	160	0.666071	2.85502	7.94679	0.00481727	0.120576
chr11:75216904:75217654	335	270	329	184	69	158	0.547547	2.90552	7.94547	0.00482078	0.120576
chr2:125274346:125275618	654	401	810	318	136	321	0.614533	3.84642	7.94359	0.00482579	0.120576
chr11:115961241:115962410	726	451	583	261	196	305	0.515967	3.81721	7.94282	0.00482786	0.120576
chr5:122106625:122107365	431	279	640	222	112	206	0.640572	3.3718	7.94254	0.0048286	0.120576
chr3:96363348:96364716	270	146	286	130	57	90	0.661219	2.44298	7.94254	0.0048286	0.120576
chr12:16196177:16196690	185	103	262	90	45	71	0.722143	2.07168	7.94195	0.00483017	0.120576
chr1:144485082:144486007	187	103	169	123	119	194	-0.629595	2.44099	7.93572	0.00484682	0.120918
chr5:93342749:93343963	370	208	425	164	99	142	0.606396	2.96602	7.93372	0.0048522	0.120979
chr3:83090834:83091207	124	93	131	51	37	56	0.589236	1.49784	7.93224	0.00485617	0.121005
chr2:152640097:152640699	331	204	311	156	61	143	0.585866	2.74162	7.92862	0.0048659	0.121018
chr11:32461481:32462208	95	106	103	96	65	124	-0.564192	1.83646	7.92833	0.00486666	0.121018
chr19:40563146:40564025	357	333	431	189	107	217	0.470116	3.19482	7.92784	0.00486798	0.121018
chr9:71551778:71553056	884	586	1028	386	178	500	0.595618	4.27695	7.92767	0.00486845	0.121018
chr11:78873217:78873843	198	177	173	225	88	215	-0.568775	2.68363	7.92611	0.00487264	0.12105
chr11:65113979:65114885	263	130	187	107	39	81	0.701034	2.16887	7.92301	0.00488099	0.121147
chr16:34347236:34348351	709	353	840	322	158	260	0.67256	3.8462	7.92247	0.00488246	0.121147
chr12:113826258:113827791	1084	1037	1000	1086	574	1063	-0.448153	5.12258	7.92013	0.00488877	0.121178
chr12:112991228:112991983	388	352	354	339	256	350	-0.477788	3.6257	7.91983	0.00488958	0.121178
chr9:40424513:40424910	117	89	139	65	24	52	0.631804	1.46613	7.9144	0.00490429	0.121417
chr7:87885843:87886429	108	122	140	54	38	62	0.592927	1.59028	7.9141	0.00490511	0.121417
chr16:19942177:19942737	81	79	84	55	95	102	-0.79243	1.63695	7.91026	0.00491552	0.121602
chr4:141573601:141574142	113	97	109	86	71	147	-0.593556	1.91532	7.90706	0.00492423	0.121744
chr3:60175407:60176163	380	298	326	170	109	172	0.48075	3.03854	7.90398	0.00493262	0.121878
chr15:78678802:78679250	210	141	240	98	56	97	0.555845	2.24403	7.90162	0.00493906	0.121964
chr2:52858522:52859113	242	225	243	249	121	273	-0.494659	3.00983	7.8982	0.0049484	0.122122
chr17:63628248:63628991	698	361	681	283	160	283	0.57784	3.76266	7.89174	0.00496611	0.122434
chr1:69684598:69685082	116	118	126	49	46	50	0.615136	1.54746	7.89142	0.00496699	0.122434
chr19:17368621:17369174	171	122	219	76	37	99	0.616977	2.0184	7.88995	0.00497104	0.12246
chr17:31750222:31750723	102	110	198	59	42	55	0.692667	1.6844	7.8872	0.00497858	0.122467
chr10:4762254:4762989	90	66	107	57	84	129	-0.75742	1.71544	7.88708	0.00497892	0.122467
chr18:90771935:90772089	909	727	667	490	712	1284	-0.803219	4.89516	7.88661	0.00498021	0.122467
chr10:41220643:41221191	270	165	325	99	55	153	0.653781	2.55806	7.88483	0.00498512	0.122514
chr11:88342028:88342722	159	143	224	204	81	235	-0.610106	2.63437	7.88264	0.00499114	0.122589
chr4:34696441:34696935	189	181	270	93	56	125	0.563546	2.35944	7.88045	0.00499722	0.12266
chr6:36928023:36928671	317	272	405	145	122	155	0.526257	2.99809	7.87945	0.00499996	0.12266
chr18:64950772:64951555	186	110	183	90	40	64	0.62835	1.9228	7.87717	0.00500627	0.122741
chr16:34667086:34667563	140	115	168	56	45	76	0.573948	1.77481	7.8742	0.00501449	0.12287
chr8:123724542:123725492	457	402	493	432	247	468	-0.421466	3.89106	7.87081	0.00502391	0.123028
chr6:85318788:85320000	815	668	693	684	459	702	-0.439566	4.59272	7.8674	0.00503339	0.123153
chr6:108615340:108616357	166	192	112	184	114	176	-0.661294	2.5344	7.86682	0.005035	0.123153
chr13:71666865:71667490	141	119	120	101	108	146	-0.60426	2.17305	7.86446	0.00504159	0.123241
chr8:125071663:125072264	98	185	126	202	62	250	-0.87988	2.48344	7.86205	0.00504832	0.123289
chr5:31772035:31772973	238	99	277	97	40	87	0.78159	2.2037	7.86114	0.00505084	0.123289
chr5:106031442:106032137	224	261	203	95	73	121	0.590688	2.47657	7.86034	0.00505308	0.123289
chr10:80158620:80159171	108	75	100	92	63	105	-0.554634	1.71658	7.85947	0.00505551	0.123289
chr8:59224842:59225578	58	45	105	46	86	99	-0.925643	1.45771	7.85428	0.00507006	0.123507
chr12:83354968:83355566	177	103	203	83	47	59	0.652714	1.9215	7.85413	0.00507047	0.123507
chr4:148711370:148711930	195	163	241	109	57	93	0.535822	2.27611	7.84963	0.0050831	0.123739
chr14:118705161:118705807	178	130	193	71	56	85	0.550661	2.01956	7.84832	0.0050868	0.123739
chr17:3273760:3274065	141	105	165	63	39	71	0.572114	1.73166	7.84656	0.00509175	0.123739
chr5:119187362:119187893	155	123	154	73	44	68	0.547978	1.81735	7.84364	0.00509998	0.123739
chr2:143672320:143672951	173	87	140	117	85	196	-0.657907	2.26252	7.8431	0.00510151	0.123739
chr3:19593819:19594267	151	138	137	49	60	52	0.67598	1.76125	7.84215	0.00510418	0.123739
chr2:13518536:13519028	108	117	137	52	40	58	0.59135	1.56008	7.84121	0.00510683	0.123739
chr11:96165804:96166602	154	172	141	180	101	155	-0.557699	2.45433	7.8412	0.00510688	0.123739
chr2:12246882:12247817	791	492	683	397	164	253	0.608268	3.937	7.84115	0.005107	0.123739
chr14:124025696:124026365	131	60	149	57	28	38	0.767467	1.38864	7.83298	0.00513014	0.124123
chr9:102118949:102119790	350	294	313	289	202	331	-0.454288	3.41666	7.83265	0.00513108	0.124123
chr2:26338391:26339583	263	406	366	376	232	376	-0.581417	3.61699	7.8321	0.00513265	0.124123
chr13:104486034:104486562	189	114	99	48	28	77	0.756337	1.65168	7.83131	0.0051349	0.124123
chr11:85656578:85657393	263	140	206	114	55	56	0.738763	2.22378	7.82491	0.0051531	0.124431
chr2:84295403:84295816	178	174	230	80	58	113	0.544336	2.23731	7.82471	0.00515367	0.124431
chr2:74859658:74860118	239	188	280	250	119	274	-0.510238	3.00053	7.8224	0.00516026	0.124471
chr16:84955671:84956046	169	107	178	46	58	68	0.670419	1.83423	7.82201	0.00516139	0.124471
chr19:42705788:42706896	411	495	452	387	287	607	-0.559274	3.99227	7.8192	0.0051694	0.124522
chr2:48997619:48998025	152	134	149	92	22	61	0.692614	1.78097	7.81679	0.0051763	0.124522
chr5:114340684:114341288	159	130	161	67	28	95	0.612633	1.85019	7.81654	0.00517703	0.124522
chr8:86134330:86135234	61	59	119	67	71	103	-0.728063	1.55823	7.81619	0.00517803	0.124522
chr15:38307747:38308405	268	276	293	248	159	356	-0.510125	3.25789	7.81525	0.00518073	0.124522
chr13:60787338:60787921	120	56	125	34	18	59	0.780873	1.21982	7.81494	0.0051816	0.124522
chr12:15936328:15936829	143	106	186	67	31	82	0.616966	1.79095	7.81351	0.0051857	0.124548
chr7:135448282:135448707	279	204	272	108	60	160	0.557969	2.59617	7.80991	0.00519605	0.124723
chr10:74913903:74914683	366	258	505	200	99	173	0.58027	3.14609	7.80797	0.00520164	0.124785
chr12:112934502:112934974	187	124	146	77	41	75	0.578336	1.88438	7.80623	0.00520665	0.124832
chr2:163319658:163320180	250	184	191	101	74	53	0.727362	2.27616	7.80462	0.0052113	0.124871
chr14:63076112:63076586	328	232	393	154	106	147	0.526871	2.93164	7.80186	0.00521925	0.12496
chr8:125235364:125236547	1741	1850	1802	1600	1056	2043	-0.451376	5.9149	7.80123	0.00522107	0.12496
chr6:29145650:29146610	615	631	685	589	360	722	-0.441086	4.42252	7.79961	0.00522576	0.125
chr10:12598339:12598845	249	208	192	240	112	260	-0.544901	2.91364	7.78834	0.00525845	0.125709
chr11:78884363:78885345	203	173	327	118	56	116	0.611694	2.46577	7.78556	0.00526655	0.125786
chr17:46774085:46774486	172	80	166	66	30	67	0.689271	1.70502	7.78513	0.0052678	0.125786
chr9:75374110:75375823	2374	2244	2606	1949	1575	2562	-0.437844	6.32024	7.78252	0.00527541	0.125895
chr2:93143594:93144282	108	70	106	112	45	120	-0.605041	1.74692	7.78114	0.00527945	0.125919
chr10:39334356:39334917	337	243	314	148	102	145	0.489764	2.86451	7.77687	0.00529195	0.126144
chr16:5139767:5140255	193	143	150	212	95	153	-0.576743	2.51024	7.77416	0.00529988	0.126237
chr9:62091972:62092689	353	305	413	180	108	203	0.458439	3.13251	7.77344	0.005302	0.126237
chr1:135097464:135098680	943	857	982	860	500	986	-0.406231	4.9256	7.7664	0.00532271	0.126592
chr11:106638661:106639647	149	121	184	71	52	66	0.568114	1.87545	7.76629	0.00532303	0.126592
chr1:137622419:137623124	234	198	316	235	138	310	-0.525734	3.0887	7.76163	0.00533677	0.126727
chr1:155038411:155039310	123	120	160	140	65	185	-0.582956	2.24154	7.76083	0.00533913	0.126727
chr10:41272829:41273906	409	301	349	191	102	186	0.483691	3.10981	7.75969	0.00534252	0.126727
chr7:7029766:7030824	87	105	66	74	102	97	-0.81238	1.74629	7.75928	0.00534373	0.126727
chr18:57834534:57835056	88	69	101	97	49	95	-0.564323	1.58831	7.75916	0.00534408	0.126727
chr6:134157807:134158613	248	262	336	305	147	316	-0.503673	3.26295	7.75549	0.00535496	0.126912
chr16:18788944:18789632	272	215	187	112	72	97	0.585873	2.44002	7.75415	0.00535891	0.126932
chr19:60904649:60905487	514	375	585	309	454	741	-0.754265	4.19907	7.75189	0.00536562	0.126977
chrX:14224111:14224721	168	115	191	70	56	67	0.588522	1.92481	7.75144	0.00536697	0.126977
chr17:31965685:31976866	1968	1771	2287	2085	1013	2123	-0.435497	6.05234	7.74604	0.00538304	0.127262
chr17:27420855:27421417	77	53	92	47	82	103	-0.811384	1.49722	7.7445	0.00538763	0.127262
chr15:60801336:60802220	276	178	293	119	51	147	0.595449	2.56005	7.74428	0.00538829	0.127262
chr19:55292716:55293341	209	170	255	111	63	103	0.517707	2.36254	7.73022	0.00543043	0.12812
chrX:160507429:160508079	177	166	251	198	110	231	-0.517943	2.75549	7.73009	0.0054308	0.12812
chr2:93663703:93664056	166	126	160	77	38	81	0.546941	1.87856	7.72195	0.00545533	0.128625
chrX:163470212:163471038	208	181	269	116	50	121	0.548645	2.40286	7.71425	0.00547866	0.129084
chr2:60640346:60641150	122	75	149	62	24	51	0.669206	1.45087	7.71345	0.00548109	0.129084
chr3:141945679:141946073	138	105	133	64	34	62	0.565487	1.61516	7.70682	0.00550126	0.129417
chr4:108380565:108381205	147	178	231	94	56	82	0.584666	2.16091	7.70594	0.00550395	0.129417
chrX:149443313:149444071	319	256	408	137	96	195	0.526857	2.97774	7.70572	0.00550463	0.129417
chr10:96206731:96207601	473	447	476	232	146	272	0.443778	3.52605	7.7044	0.00550864	0.129437
chr11:115825586:115827560	2973	2911	3464	2668	1800	3367	-0.408564	6.67477	7.70046	0.00552067	0.129646
chr12:80008960:80009478	90	103	55	100	47	126	-0.741775	1.6692	7.6991	0.00552485	0.12967
chr10:41225141:41225708	241	158	206	72	63	117	0.583156	2.27489	7.69721	0.00553061	0.129702
chr3:27385063:27385991	78	61	107	39	103	156	-1.02619	1.77169	7.6966	0.00553248	0.129702
chr13:96254571:96255146	144	115	197	80	26	81	0.647037	1.84792	7.69393	0.00554069	0.12982
chrX:100561445:100561994	177	171	170	176	117	165	-0.499281	2.56273	7.69245	0.00554522	0.129853
chr1:135264223:135265011	87	115	167	97	105	168	-0.703847	2.17922	7.69098	0.00554974	0.129885
chr4:101348191:101348884	307	106	334	123	48	84	0.865547	2.44788	7.68991	0.00555304	0.129888
chr15:73517961:73518447	145	93	133	63	38	51	0.600721	1.5811	7.68628	0.00556422	0.130039
chr7:31953381:31954031	175	161	208	197	85	233	-0.5489	2.65283	7.68399	0.00557129	0.130039
chr2:164692479:164693057	92	69	115	113	59	87	-0.587976	1.69368	7.68292	0.00557459	0.130039
chr14:54852521:54853848	924	669	875	449	264	436	0.428563	4.33783	7.68289	0.00557467	0.130039
chr6:88743152:88743589	144	54	142	60	23	34	0.849644	1.362	7.68197	0.00557753	0.130039
chr13:23654961:23655348	216	174	149	85	64	62	0.652117	2.10153	7.68168	0.00557843	0.130039
chr3:95067062:95067692	181	225	250	106	57	122	0.556232	2.40959	7.6776	0.00559105	0.130254
chr8:96712818:96714176	2825	1856	2570	1324	696	1330	0.453851	5.87275	7.67565	0.00559708	0.130254
chr18:75722089:75722641	117	91	117	152	58	104	-0.601316	1.94265	7.67564	0.00559712	0.130254
chr13:81271998:81272943	1411	1042	1358	770	314	632	0.509728	4.92823	7.67348	0.00560382	0.130282
chr15:74579567:74580047	210	169	200	108	56	90	0.520963	2.24019	7.67322	0.00560463	0.130282
chr17:67099837:67100500	348	274	274	158	85	157	0.508077	2.868	7.66913	0.00561736	0.130504
chr3:78875405:78875870	123	162	80	58	34	39	0.823492	1.52026	7.66612	0.00562672	0.130648
chr19:58117750:58118500	181	118	302	83	50	96	0.70187	2.2028	7.66369	0.00563431	0.130673
chr3:115465775:115466478	214	143	212	203	104	203	-0.504207	2.68403	7.6634	0.00563522	0.130673
chr14:26972807:26973618	471	356	402	418	207	492	-0.496615	3.79767	7.66272	0.00563733	0.130673
chr6:54911972:54912334	126	93	130	103	78	134	-0.531972	2.00235	7.66123	0.00564199	0.130708
chr6:17029124:17029694	124	65	226	55	21	65	0.895837	1.61803	7.65841	0.00565082	0.130769
chr6:114870367:114871346	390	337	411	392	189	427	-0.464424	3.66704	7.65836	0.00565097	0.130769
chr5:148131161:148131588	154	88	132	72	26	52	0.658438	1.56931	7.65594	0.00565858	0.130857
chr19:46552838:46554717	1168	1447	1350	1299	782	1451	-0.478569	5.49092	7.65512	0.00566116	0.130857
chr12:82064449:82065483	81	98	112	89	86	98	-0.615588	1.79663	7.65243	0.0056696	0.130979
chr1:165837372:165837975	166	91	207	84	31	64	0.706165	1.84314	7.64834	0.00568245	0.131202
chr6:147681101:147681680	161	114	159	132	94	159	-0.50707	2.30009	7.64528	0.00569212	0.131352
chr12:58184636:58185301	143	160	141	73	46	69	0.575196	1.85969	7.63976	0.00570954	0.131679
chr9:21959925:21960645	222	168	199	94	66	97	0.514332	2.26747	7.63877	0.00571267	0.131679
chr5:134556514:134557074	193	99	171	81	37	69	0.636092	1.87069	7.63611	0.00572111	0.131775
chr5:65073300:65074244	398	335	594	421	239	610	-0.583817	3.94424	7.63501	0.00572461	0.131775
chr19:44386218:44386808	133	48	153	32	27	54	0.858924	1.32969	7.63444	0.00572642	0.131775
chr15:52799237:52800125	174	207	161	160	132	218	-0.577217	2.6823	7.63209	0.00573389	0.131873
chr18:64219142:64220203	547	388	566	259	165	257	0.454603	3.61181	7.62968	0.00574155	0.131912
chr1:196647627:196648780	660	548	630	354	196	294	0.450981	3.91259	7.62955	0.00574197	0.131912
chr16:18396186:18396754	261	132	206	100	49	97	0.616729	2.24121	7.62732	0.00574907	0.131958
chr11:97675046:97675646	91	104	72	98	54	112	-0.619719	1.6927	7.62661	0.00575134	0.131958
chr1:174294827:174295291	174	100	155	66	43	68	0.591474	1.78387	7.6259	0.00575359	0.131958
chr4:129484010:129484583	87	128	59	108	77	112	-0.765586	1.82791	7.6249	0.00575678	0.131958
chr14:65616229:65616852	193	78	193	68	31	75	0.745998	1.82735	7.62211	0.00576569	0.132088
chr13:54342961:54343247	129	118	117	64	34	56	0.578293	1.57384	7.61626	0.00578443	0.132293
chr5:54361193:54361911	283	248	318	257	148	378	-0.521301	3.27663	7.61624	0.00578448	0.132293
chr5:111473124:111473643	83	95	92	81	58	118	-0.583342	1.67817	7.61512	0.00578808	0.132293
chr10:25010712:25011416	224	274	241	229	167	273	-0.520814	3.09336	7.61349	0.00579333	0.132293
chr11:28851429:28851901	145	93	156	46	42	71	0.616801	1.65505	7.61203	0.00579802	0.132293
chr8:129218248:129219028	269	116	219	105	55	50	0.805765	2.18129	7.61171	0.00579905	0.132293
chr18:62273519:62274252	207	202	327	90	88	117	0.604297	2.53999	7.61055	0.00580278	0.132293
chr1:163480782:163481202	86	70	104	78	68	93	-0.575684	1.60563	7.61011	0.0058042	0.132293
chr2:12242368:12242980	436	305	328	186	116	161	0.524895	3.10966	7.60973	0.0058054	0.132293
chr16:77444197:77444596	132	72	123	44	27	60	0.647775	1.38313	7.60933	0.00580671	0.132293
chr1:120595684:120596900	662	509	880	352	189	373	0.498831	4.03413	7.60761	0.00581226	0.132346
chr11:63733983:63734453	247	200	272	139	69	108	0.514844	2.54431	7.60609	0.00581716	0.132384
chr5:114305702:114306960	375	244	374	182	75	177	0.547455	2.98337	7.60373	0.00582476	0.13244
chr1:74130460:74132036	1488	1158	1429	1146	857	1365	-0.412388	5.47518	7.60335	0.005826	0.13244
chr6:7527781:7528409	205	118	172	103	33	55	0.717026	1.94239	7.6008	0.00583425	0.132534
chr5:36145916:36146876	210	84	219	211	91	246	-0.745483	2.65987	7.59923	0.00583933	0.132534
chr1:72258332:72259158	311	235	354	179	74	139	0.541004	2.84817	7.59909	0.00583979	0.132534
chr9:107498977:107499768	383	229	492	178	106	168	0.591793	3.10612	7.59661	0.00584783	0.132643
chr5:72610817:72611421	360	221	280	155	72	146	0.552075	2.78464	7.58795	0.00587596	0.133189
chr4:88286602:88288362	1100	1414	1449	1263	883	1339	-0.488896	5.4927	7.58692	0.00587934	0.133189
chr6:72718826:72719623	186	145	230	99	47	97	0.543967	2.17725	7.58623	0.00588159	0.133189
chr10:12538953:12539619	133	170	130	145	85	194	-0.597256	2.3738	7.5852	0.00588493	0.133191
chr4:119915379:119915903	92	95	102	85	73	107	-0.558166	1.75744	7.57799	0.00590853	0.133652
chrX:99261440:99261778	135	75	123	44	30	60	0.635881	1.4137	7.57491	0.00591863	0.133807
chr5:114375435:114376483	1094	924	1035	892	600	1034	-0.396785	5.05449	7.57274	0.00592576	0.133895
chr3:104163826:104164763	680	422	420	274	91	256	0.684786	3.55403	7.57137	0.00593027	0.133923
chr19:23130718:23132073	804	400	757	347	164	300	0.601263	3.92413	7.56707	0.00594445	0.13417
chr13:46353224:46353743	121	98	131	56	39	51	0.574734	1.51324	7.56589	0.00594833	0.134184
chr13:81020868:81021362	269	225	306	140	87	132	0.47548	2.71176	7.56392	0.00595485	0.134238
chr1:35936285:35936870	109	108	132	78	20	34	0.761433	1.45044	7.56307	0.00595765	0.134238
chr7:83054913:83055416	158	103	116	74	29	49	0.651529	1.59095	7.56221	0.00596049	0.134238
chr16:63104529:63105413	221	231	216	132	62	92	0.567695	2.43544	7.55935	0.00596996	0.134378
chr13:37753872:37754387	100	89	125	81	74	142	-0.596938	1.88815	7.55479	0.00598506	0.134644
chr8:71197719:71198391	125	62	165	44	28	59	0.738065	1.4445	7.55166	0.00599548	0.134733
chr6:8286559:8287327	228	153	200	89	61	102	0.526234	2.2391	7.55164	0.00599556	0.134733
chr8:8182811:8183866	535	591	1108	361	161	376	0.667679	4.09049	7.54918	0.00600374	0.134844
chr7:38158898:38159261	163	105	168	80	40	61	0.588683	1.80695	7.54306	0.00602416	0.135165
chr14:76251471:76252398	93	118	98	122	67	105	-0.582953	1.87671	7.54292	0.00602462	0.135165
chr18:38156304:38158818	1158	1047	1152	1089	584	1182	-0.410872	5.20063	7.53696	0.0060446	0.13551
chr10:59663604:59664134	145	72	178	78	17	43	0.870731	1.56682	7.53637	0.00604658	0.13551
chr18:43138186:43138915	198	83	210	70	52	48	0.785286	1.89018	7.53099	0.00606465	0.135842
chr7:72682360:72682832	107	106	139	66	32	48	0.598903	1.51309	7.52995	0.00606818	0.135847
chr12:85287848:85288860	514	514	695	505	311	823	-0.561866	4.31985	7.52867	0.00607246	0.135869
chr15:90483467:90484041	172	208	138	100	45	49	0.763244	2.02145	7.5241	0.0060879	0.13614
chr13:63081480:63081983	125	58	126	48	22	49	0.703576	1.28044	7.5218	0.00609569	0.136209
chr1:60215043:60215733	397	292	427	207	110	188	0.472137	3.18171	7.52119	0.00609774	0.136209
chr10:87821123:87821820	321	310	356	305	199	330	-0.427647	3.44529	7.52026	0.00610089	0.136209
chr15:84542847:84543959	714	654	761	777	348	766	-0.461781	4.57108	7.51712	0.00611153	0.136327
chr11:101742375:101743651	811	773	767	734	430	869	-0.434872	4.70517	7.51634	0.00611418	0.136327
chr19:17424598:17425524	314	303	334	293	168	394	-0.484796	3.42516	7.51578	0.00611607	0.136327
chr14:55707721:55708534	385	378	471	404	213	469	-0.459187	3.78147	7.51479	0.00611943	0.136328
chr2:58730374:58731166	510	498	538	261	172	290	0.428908	3.67841	7.51382	0.00612274	0.136328
chr14:68668798:68669460	211	166	234	105	55	112	0.505029	2.31576	7.51243	0.00612746	0.136359
chr15:64245051:64245795	117	171	125	74	23	68	0.722481	1.71798	7.50621	0.00614866	0.136757
chr12:88734182:88735029	284	276	338	285	154	374	-0.494086	3.34428	7.50351	0.00615788	0.136819
chr7:126883364:126883623	76	50	79	55	52	90	-0.629722	1.29472	7.50346	0.00615807	0.136819
chr16:32148872:32149870	789	563	717	560	481	732	-0.477343	4.53247	7.49956	0.00617142	0.137041
chr9:118691743:118692357	202	49	218	47	17	77	1.09494	1.72853	7.4979	0.0061771	0.137094
chr16:33769481:33770416	111	113	89	129	66	104	-0.586835	1.89611	7.49666	0.00618135	0.137114
chr11:69427453:69427748	155	116	212	75	55	64	0.605548	1.94201	7.49377	0.00619127	0.13726
chr8:81854841:81855427	253	197	356	147	75	117	0.56698	2.67665	7.49199	0.00619742	0.137323
chr3:51438255:51438803	309	330	307	286	203	339	-0.473161	3.41839	7.48908	0.00620743	0.137471
chr15:75681082:75681762	489	429	495	432	250	545	-0.442352	3.96859	7.48265	0.00622963	0.137794
chr14:101902228:101902992	301	214	329	149	79	149	0.493985	2.77398	7.48257	0.00622991	0.137794
chr17:47432127:47433272	608	898	818	880	452	876	-0.556768	4.76961	7.48195	0.00623206	0.137794
chr4:139167343:139168038	490	454	432	453	262	477	-0.44519	3.9396	7.47935	0.00624108	0.137871
chr15:18989298:18990020	100	50	101	55	86	122	-0.80811	1.66695	7.47893	0.0062425	0.137871
chr13:114832602:114833042	74	63	90	46	72	118	-0.764736	1.51448	7.47682	0.00624985	0.137871
chr12:113136433:113137223	149	102	201	73	45	65	0.609113	1.84483	7.47623	0.00625189	0.137871
chr8:29409468:29411126	664	504	556	282	202	297	0.456815	3.8193	7.47553	0.0062543	0.137871
chr2:152729310:152730649	1894	1883	1966	1684	1190	1882	-0.403495	5.97465	7.47515	0.00625562	0.137871
chr16:13366482:13367820	394	312	397	175	137	177	0.473184	3.17175	7.47338	0.00626178	0.137888
chr1:39481099:39481878	143	147	142	67	36	84	0.562973	1.82016	7.4719	0.00626692	0.137888
chr6:149082656:149083550	256	170	616	137	41	159	0.996674	2.87214	7.47019	0.0062729	0.137888
chr3:144305972:144306853	323	240	308	150	85	162	0.469262	2.83437	7.47009	0.00627325	0.137888
chr2:32008498:32009441	199	183	197	216	93	226	-0.515869	2.72895	7.46982	0.00627419	0.137888
chr11:87962089:87962815	389	350	395	212	87	217	0.506792	3.20093	7.46917	0.00627646	0.137888
chr3:78723324:78723856	173	144	203	89	54	84	0.517049	2.08597	7.46677	0.00628484	0.137999
chr16:4862891:4863381	288	180	322	150	63	120	0.581107	2.64191	7.46553	0.00628914	0.13802
chr1:43786834:43787972	607	400	715	294	159	308	0.506699	3.77882	7.46427	0.00629357	0.138043
chr4:105872308:105873109	356	92	365	122	36	99	1.00752	2.51933	7.46223	0.00630067	0.138113
chr13:13452201:13452797	213	58	216	17	27	86	1.22402	1.74639	7.46083	0.00630561	0.138113
chr1:132628233:132628691	127	99	105	90	66	174	-0.635986	1.99471	7.46048	0.00630682	0.138113
chr5:137534426:137535637	172	146	165	161	96	166	-0.47418	2.44256	7.45866	0.0063132	0.138122
chr4:39597636:39598436	81	47	94	44	78	118	-0.849182	1.51627	7.45792	0.00631581	0.138122
chr13:117751401:117751990	108	128	120	136	75	118	-0.54525	2.05396	7.457	0.00631903	0.138122
chr12:118778806:118779328	157	101	197	69	33	85	0.622346	1.8486	7.45655	0.0063206	0.138122
chr6:100560076:100560597	174	114	167	74	43	78	0.548642	1.8833	7.45469	0.00632715	0.138168
chr8:32143680:32144065	130	99	123	61	28	61	0.572818	1.52014	7.45404	0.00632943	0.138168
chr5:44232384:44233401	315	218	332	140	75	170	0.509832	2.80247	7.45143	0.0063386	0.138285
chr19:26967175:26967932	563	448	526	482	290	515	-0.408972	4.06942	7.44984	0.0063442	0.138285
chr12:74764154:74764858	299	342	387	310	203	396	-0.47844	3.53482	7.44966	0.00634485	0.138285
chr15:57651243:57651884	447	252	430	175	119	188	0.533253	3.16762	7.44438	0.00636347	0.138616
chr2:148480694:148481094	171	106	145	73	40	64	0.577139	1.76929	7.44345	0.00636677	0.138616
chr3:52863805:52864306	269	172	255	109	66	130	0.519867	2.49158	7.44113	0.00637498	0.138722
chr9:118790793:118791492	300	206	207	143	56	95	0.629029	2.49773	7.436	0.00639317	0.139011
chr1:93428823:93429397	268	172	412	105	75	153	0.666105	2.70852	7.43548	0.00639504	0.139011
chr5:112090962:112091338	123	44	140	42	16	49	0.856739	1.21676	7.43201	0.00640737	0.139206
chr4:144503345:144504167	645	321	529	546	290	549	-0.559441	4.09984	7.42891	0.00641842	0.139312
chr15:85433753:85434290	215	211	208	222	104	266	-0.52504	2.86878	7.42874	0.00641903	0.139312
chr7:127898162:127898507	253	181	290	124	41	140	0.623507	2.50791	7.42745	0.00642362	0.139315
chr12:53996503:53996968	103	116	155	64	34	58	0.593644	1.59966	7.42681	0.00642592	0.139315
chr2:90393757:90394616	400	307	407	216	115	166	0.486566	3.17756	7.42425	0.00643505	0.139422
chr19:23199811:23200900	208	184	302	110	55	134	0.561258	2.47071	7.42353	0.00643764	0.139422
chr9:48161195:48162026	200	208	188	203	102	258	-0.540833	2.79271	7.4225	0.00644134	0.139429
chr6:93912202:93913096	217	164	196	116	55	68	0.594802	2.20769	7.41739	0.00645964	0.139752
chr5:114262039:114262905	240	161	226	238	105	230	-0.51736	2.83279	7.41623	0.00646383	0.139769
chr1:34360527:34361539	309	333	297	255	208	405	-0.542748	3.4492	7.41512	0.0064678	0.139782
chr8:109526229:109526816	245	181	289	132	52	127	0.553641	2.51514	7.40756	0.00649503	0.140297
chr1:122202326:122202821	90	74	83	86	64	77	-0.569058	1.53639	7.40101	0.00651874	0.140735
chr1:41446562:41447561	240	241	279	129	82	133	0.472934	2.64687	7.39876	0.00652689	0.140805
chr4:42452247:42453684	678	348	533	418	390	652	-0.610511	4.19171	7.39682	0.00653394	0.140805
chr8:107530929:107531263	85	62	73	52	64	99	-0.664444	1.41956	7.39662	0.00653467	0.140805
chr4:10850307:10850825	232	222	267	130	74	122	0.477141	2.56837	7.39574	0.00653784	0.140805
chr2:102713971:102714448	129	92	135	47	46	50	0.605255	1.52366	7.39493	0.00654078	0.140805
chr17:32054547:32055915	221	108	146	73	28	87	0.702635	1.89035	7.39447	0.00654246	0.140805
chr12:88139715:88140153	137	149	185	78	50	74	0.544679	1.94296	7.39257	0.00654939	0.140813
chrX:143864074:143864658	227	171	213	117	54	99	0.518063	2.31439	7.39249	0.00654967	0.140813
chr13:52625823:52626311	282	193	238	126	69	121	0.50633	2.53691	7.39111	0.00655471	0.140848
chr7:119155655:119156758	428	316	465	242	92	199	0.537309	3.26974	7.38848	0.00656429	0.14098
chr11:85912830:85913287	134	112	142	74	40	46	0.59401	1.65109	7.38339	0.00658288	0.141306
chr1:89641506:89642093	63	62	106	40	97	129	-0.962965	1.64174	7.3794	0.00659753	0.141469
chr6:88824551:88825196	180	133	207	100	41	82	0.561081	2.06454	7.37878	0.00659978	0.141469
chr2:135542974:135543683	230	230	290	207	141	380	-0.592227	3.14198	7.37851	0.00660079	0.141469
chr10:26092732:26093130	163	137	156	72	46	82	0.521182	1.90557	7.37675	0.00660724	0.141534
chr2:60222707:60223162	187	110	170	86	44	62	0.598608	1.89998	7.37509	0.00661336	0.141591
chr1:187839126:187840299	466	405	495	239	119	278	0.461182	3.48125	7.36773	0.00664047	0.142098
chr4:115404185:115405439	652	536	738	381	174	334	0.461766	3.96787	7.36311	0.00665754	0.142389
chr1:172410891:172411546	383	196	324	186	57	101	0.741248	2.77589	7.36015	0.00666854	0.14255
chr15:63171786:63172483	177	172	250	91	73	86	0.555051	2.27211	7.35784	0.00667709	0.142659
chr3:97445797:97446551	762	537	694	376	182	363	0.460824	4.0178	7.35597	0.00668404	0.142689
chr14:66284834:66285353	136	111	130	55	41	65	0.550176	1.6285	7.35518	0.00668696	0.142689
chr15:84102816:84103558	87	31	69	91	28	91	-0.798769	1.25957	7.35468	0.00668885	0.142689
chr18:52809669:52810258	124	98	143	60	36	59	0.558443	1.57357	7.34995	0.00670646	0.14299
chr12:88272802:88273878	695	484	598	333	177	305	0.459039	3.85604	7.34799	0.00671377	0.143022
chr1:187821788:187822248	138	140	135	40	33	93	0.677154	1.71916	7.34692	0.00671776	0.143022
chr7:59397382:59397903	93	69	113	73	79	104	-0.611925	1.69983	7.34676	0.00671838	0.143022
chr4:107040090:107040946	782	734	775	461	231	358	0.465953	4.22662	7.34444	0.00672706	0.143026
chr2:154542243:154543141	184	126	507	86	41	130	1.00637	2.52297	7.34411	0.0067283	0.143026
chr9:56061107:56061640	165	89	161	68	29	73	0.62885	1.71915	7.34393	0.00672897	0.143026
chr12:111360862:111361558	271	102	289	128	26	59	0.994123	2.24468	7.34265	0.00673376	0.143054
chr3:116043874:116044416	187	191	228	101	70	94	0.509284	2.3125	7.33828	0.00675015	0.143323
chr11:105453240:105453709	195	190	173	111	50	77	0.575501	2.17814	7.33742	0.00675338	0.143323
chr11:113575451:113575919	104	96	102	98	64	111	-0.520421	1.79849	7.33555	0.00676041	0.143399
chr13:60589337:60590272	268	190	250	108	75	132	0.492089	2.53141	7.33298	0.00677006	0.143525
chr11:110283504:110283697	79	64	40	40	64	105	-0.880325	1.29356	7.33212	0.00677331	0.143525
chr10:80869133:80875773	4973	4598	5780	4436	2948	5045	-0.368995	7.365	7.32763	0.00679026	0.14381
chr19:42109695:42110363	507	408	610	248	158	296	0.446678	3.63739	7.32425	0.00680305	0.144007
chr8:81821709:81821993	122	119	159	71	33	68	0.55902	1.70375	7.32263	0.00680916	0.144062
chr12:15550875:15551753	425	352	462	209	147	211	0.438483	3.35035	7.31955	0.00682084	0.144235
chr18:46907440:46908100	151	150	183	66	56	86	0.535411	1.985	7.31704	0.00683038	0.144363
chr4:32384175:32384607	130	90	141	134	60	142	-0.546188	2.05495	7.31477	0.00683903	0.144419
chr10:89231079:89232113	473	531	473	478	281	557	-0.473998	4.06368	7.3145	0.00684005	0.144419
chr8:125072581:125073530	538	588	500	614	290	591	-0.505417	4.22202	7.31048	0.00685537	0.144668
chr8:119028523:119029007	135	102	131	68	38	47	0.58308	1.57993	7.30636	0.00687109	0.144926
chr10:18693764:18694664	208	243	239	281	114	258	-0.542937	3.00383	7.30491	0.00687666	0.144969
chr14:9132812:9133313	174	124	195	67	32	107	0.620724	1.96828	7.29802	0.00690308	0.145452
chr18:55144998:55145811	809	639	818	406	250	423	0.397443	4.23016	7.29642	0.00690922	0.145507
chr17:35530417:35532474	3561	2840	3981	2663	2392	3783	-0.471047	6.85296	7.29442	0.00691693	0.145536
chr6:134776068:134776419	166	157	152	79	42	88	0.53435	1.96299	7.29422	0.00691768	0.145536
chr14:110503268:110503761	93	49	83	54	80	91	-0.749092	1.48063	7.29103	0.00692996	0.145701
chr7:56505268:56505698	221	126	204	81	68	68	0.61773	2.1239	7.29036	0.00693256	0.145701
chr9:32216524:32217547	362	262	310	165	82	177	0.489411	2.92757	7.28853	0.00693962	0.145775
chr12:71237241:71237783	182	207	203	96	70	88	0.538274	2.27623	7.28638	0.00694792	0.145811
chr1:155232015:155232659	358	268	438	331	196	408	-0.477779	3.56644	7.28557	0.00695105	0.145811
chr10:80844691:80845252	143	129	167	137	82	173	-0.493874	2.31276	7.28533	0.00695199	0.145811
chr13:94943515:94944049	149	124	119	73	38	53	0.589159	1.67396	7.28424	0.00695621	0.145826
chr15:79882272:79882678	84	72	92	90	44	97	-0.55033	1.52827	7.28332	0.00695978	0.145826
chr10:79561195:79561714	167	153	144	194	69	194	-0.588225	2.45859	7.27972	0.00697374	0.146045
chr7:19865711:19871080	1502	1903	1784	2165	1159	1481	-0.556353	5.9248	7.27855	0.00697828	0.146066
chr10:74657666:74658190	145	103	108	69	22	56	0.638297	1.51761	7.27661	0.00698583	0.146124
chr12:74694078:74695655	176	151	254	186	105	247	-0.543474	2.73437	7.27508	0.00699178	0.146124
chr16:44493724:44494328	134	44	135	53	18	36	0.870768	1.23939	7.27421	0.00699516	0.146124
chr19:3163756:3164210	69	41	94	42	78	99	-0.863152	1.39583	7.27419	0.00699525	0.146124
chr14:43925126:43926136	417	256	476	326	232	508	-0.56412	3.72094	7.26094	0.00704706	0.147073
chr2:83652462:83653238	434	294	473	216	126	190	0.487394	3.27678	7.26025	0.00704974	0.147073
chr2:79838311:79839990	1418	1349	1166	792	367	585	0.528594	4.98459	7.25982	0.00705142	0.147073
chr2:68633974:68634540	143	108	120	74	30	51	0.60042	1.58756	7.25339	0.00707674	0.147516
chr11:48603726:48604154	173	151	155	78	56	72	0.534224	1.97486	7.25159	0.00708383	0.147516
chr1:181951742:181952285	229	148	220	93	49	118	0.542876	2.26584	7.25088	0.00708662	0.147516
chr3:122173716:122175058	897	845	758	504	245	322	0.560997	4.31985	7.2508	0.00708695	0.147516
chr9:48541752:48542730	888	467	782	369	183	371	0.548021	4.07184	7.24877	0.00709498	0.147608
chr15:7038507:7039613	479	329	530	236	110	254	0.505867	3.42261	7.24563	0.00710737	0.147792
chr3:122795270:122795767	140	82	195	85	21	43	0.829631	1.65519	7.24394	0.00711407	0.147841
chr9:107351069:107351820	209	274	271	205	158	385	-0.622874	3.17972	7.24322	0.00711691	0.147841
chr9:55174111:55175319	564	603	955	784	396	758	-0.527833	4.5938	7.2418	0.00712256	0.147884
chr9:63962188:63963121	644	452	665	332	138	325	0.506831	3.81779	7.23894	0.00713389	0.148039
chr1:151300445:151300997	103	47	62	42	95	104	-0.962947	1.51569	7.23811	0.00713721	0.148039
chr11:119594209:119594767	173	121	216	89	49	77	0.561783	2.03361	7.23238	0.00716003	0.148437
chr14:106823798:106824268	214	132	217	103	59	65	0.607678	2.15765	7.22887	0.00717405	0.148653
chr1:190435675:190436253	86	67	89	54	90	96	-0.739869	1.58692	7.22587	0.00718604	0.148816
chr12:81424479:81425288	416	292	441	361	201	455	-0.477151	3.67896	7.2251	0.00718912	0.148816
chr5:51944885:51945388	120	117	138	68	28	66	0.562493	1.61525	7.22234	0.00720019	0.14897
chr5:64771818:64772320	65	80	101	62	66	112	-0.649417	1.57344	7.22133	0.00720422	0.148979
chr8:7732487:7733413	433	458	575	251	173	230	0.4733	3.5803	7.21796	0.00721778	0.149025
chr2:28047744:28049577	1542	1462	1704	1438	813	1790	-0.420356	5.69239	7.21776	0.00721856	0.149025
chr10:53719773:53720588	174	108	202	87	37	78	0.595113	1.94568	7.2176	0.0072192	0.149025
chr19:46551810:46552437	128	127	117	156	72	119	-0.550135	2.11852	7.21718	0.0072209	0.149025
chr13:38113608:38114286	173	134	184	55	56	94	0.570433	1.98632	7.21373	0.00723482	0.149215
[truncated: 39,216 more rows]

## Sheet: GFP-.enriched.502.peaks
chromosome	start	end
chr11	106921021	106921251
chr3	19566620	19567132
chr5	50426032	50426900
chr3	53025258	53025967
chr1	59954759	59955015
chr1	71586817	71587071
chr15	99998072	99999147
chr11	17365609	17365855
chr8	71791417	71791721
chr12	4430792	4431203
chr3	59770424	59770901
chr7	133926212	133926547
chr17	46563300	46563781
chr11	4089695	4089937
chr11	68546748	68547352
chr13	93066616	93067400
chr10	89286714	89288256
chr1	34388340	34389081
chr14	106772050	106772899
chr1	75584124	75585170
chr14	50213270	50213634
chr3	97445797	97446551
chr8	75545850	75546380
chr3	122883657	122884407
chr7	116744182	116744593
chr2	147730642	147731411
chr4	100067763	100068550
chr12	78157741	78158127
chr9	66374064	66374913
chr1	164565140	164566517
chr13	81271998	81272943
chr5	108766143	108766933
chr7	50965213	50966651
chr8	107432833	107433798
chr17	48624215	48624583
chr11	53619135	53619951
chr18	60772052	60772341
chr18	7608593	7609991
chr6	136355060	136355249
chr1	45757715	45758558
chr4	138361083	138361688
chr13	67030776	67031755
chr7	4118292	4119165
chr9	51833324	51833822
chr9	57566119	57566787
chr9	5928258	5928842
chrX	73370848	73371800
chr6	136907352	136908046
chr19	42702494	42703023
chr14	124439737	124440550
chr11	88048278	88049853
chr1	38414851	38415930
chr9	96406328	96407110
chr17	44398544	44399092
chr7	30987821	30989403
chr11	100224520	100224813
chr13	33031054	33031438
chr14	106792520	106793718
chr16	38174520	38175143
chr1	182995394	182996148
chr2	104421320	104422042
chr3	101208554	101208877
chr12	8266240	8266832
chr1	129629327	129629772
chr9	20598203	20599431
chr15	62279783	62279970
chr10	58067212	58068181
chr12	53594052	53594796
chr1	69153454	69153946
chr4	58630034	58630534
chr1	30832861	30833602
chr13	49271014	49271504
chr8	80587392	80587724
chr8	45432502	45433630
chr10	89221172	89222015
chr3	157103956	157105533
chr8	126128512	126130011
chr13	19714450	19715382
chr8	115947740	115948089
chr11	29547559	29548037
chr2	11070718	11071210
chrX	162252938	162253353
chr2	75732193	75732944
chr16	94851524	94851735
chr5	116738698	116739309
chr5	136173266	136173889
chr7	63244120	63244389
chr7	133799033	133799609
chr2	58498221	58499142
chr9	118649968	118651028
chr5	114814821	114815948
chr18	39783905	39784291
chr8	24655063	24655748
chr8	126108097	126108488
chr8	79760539	79760881
chr1	174489552	174490294
chr7	73340909	73342148
chr16	20020374	20021491
chr7	105648931	105649516
chr15	76286113	76288891
chr8	24545945	24546487
chrX	11372102	11372504
chrX	89352636	89353031
chr13	49676839	49677974
chr9	98392011	98392696
chr18	23979861	23980737
chr18	5817530	5818231
chr11	68436677	68437926
chr6	83252140	83252636
chr4	122758053	122758422
chr11	32504377	32506187
chr8	126135216	126136153
chr1	194490232	194490420
chr2	75754793	75755026
chr1	120812951	120813594
chr1	76940379	76940766
chr8	123892302	123893554
chr9	61865815	61866810
chr7	108542029	108543126
chr15	76988790	76989303
chr3	60452018	60452928
chr7	80556443	80557886
chr9	118885672	118886071
chr6	22311874	22312286
chr4	42663677	42665075
chr7	80724136	80724578
chr19	54762231	54763810
chr4	62254776	62255277
chr15	39698542	39698692
chr14	124060202	124060705
chr16	10366399	10367211
chr11	65162551	65162992
chr15	51684867	51686526
chr9	95558203	95559089
chr15	38243496	38244253
chr18	35239727	35240132
chr13	5825203	5825895
chr17	81226888	81227062
chr15	12805170	12805844
chr2	25203673	25204048
chr16	33766240	33767202
chr12	110778781	110779898
chr18	55819664	55820692
chr6	87116772	87117555
chr10	60276663	60278027
chr8	113188421	113188706
chr2	160360944	160361715
chr8	126126562	126128269
chr10	89201883	89202769
chr8	122569898	122571035
chr3	85860515	85862033
chr2	91589788	91590795
chr14	16205446	16205852
chr15	100577402	100578312
chr16	30241496	30242065
chr6	7832461	7832932
chr17	79880055	79881603
chr8	26555475	26555958
chr4	97441390	97442559
chr1	135137328	135138106
chrX	142283834	142284304
chr16	14357031	14357510
chr1	43786834	43787972
chr12	114662448	114663644
chr4	33673303	33673951
chr8	124503851	124504122
chr11	77463386	77463790
chr8	126109754	126110660
chr4	154147771	154148305
chr1	34920831	34921803
chr11	11163146	11163749
chr13	50807110	50807404
chr2	31744238	31744753
chr2	101671752	101673072
chr6	144593281	144593606
chr8	26153651	26155093
chr9	121550405	121552397
chr8	126225902	126226574
chrX	49574743	49575343
chr1	190719944	190720209
chr2	44879259	44880349
chr16	35117196	35117874
chr8	26176808	26177595
chr3	71316634	71317232
chr19	32407383	32408006
chr13	51117806	51119013
chr12	81206966	81207999
chr1	38377142	38377465
chr16	52336181	52336890
chr11	80659475	80659870
chr6	17275975	17276682
chr8	87235460	87237648
chr4	104744216	104744874
chr5	91261310	91261914
chr10	129717097	129717661
chr8	126137855	126140218
chr5	47194811	47195771
chr19	10222727	10224213
chr12	86152443	86153244
chr2	67967784	67968108
chr16	15252814	15253644
chr8	126116593	126117899
chr2	121636403	121637039
chr5	33485203	33486068
chr16	93715805	93716590
chr9	99058503	99059005
chr12	28288797	28289625
chr17	80370740	80371538
chr17	35686074	35687097
chr8	126104660	126105593
chr16	23291401	23292103
chr8	126147183	126148075
chr1	64841822	64842580
chr7	17365351	17365861
chr7	75117663	75119274
chr15	39566769	39567091
chr2	5999540	5999998
chr9	63757396	63757817
chr10	30699466	30700680
chr14	61322097	61322553
chr10	24742971	24743944
chr14	50215730	50216350
chr16	30775100	30777007
chr2	178684368	178685506
chr4	122914429	122915690
chr12	72466981	72467605
chr1	166744346	166744831
chr18	33572159	33573416
chr8	126114879	126115601
chr2	127299709	127300758
chr3	123400498	123401249
chr6	4380846	4381501
chr4	43197695	43198903
chr3	86963139	86963531
chr5	118481073	118481916
chr10	80136752	80137808
chr16	31592103	31592847
chr15	51629707	51631037
chr7	148087594	148088490
chr17	47182420	47183500
chr14	51690549	51691231
chr10	110888847	110889761
chr8	126096222	126097613
chr12	74103311	74103636
chr2	80260155	80260722
chr15	100568142	100569448
chr17	80367572	80369749
chr11	74679889	74681944
chr19	58013364	58014098
chr4	138303086	138304163
chr16	85749534	85749980
chr2	166502188	166503064
chr9	87834954	87835573
chr8	116104764	116105785
chrX	93954613	93955186
chr3	95569584	95571011
chr14	32928230	32929002
chr9	110638702	110639270
chr5	105728239	105728980
chr12	74084095	74084832
chrX	27429491	27429853
chr9	121563822	121564234
chr10	80897299	80898647
chr4	137047182	137047519
chr8	93678492	93678815
chr4	10850307	10850825
chr16	29891439	29892063
chr7	36642570	36643199
chr10	62938725	62939652
chr1	37075688	37076358
chr8	123842475	123842895
chr9	122756723	122757352
chr5	23032051	23032496
chr17	56070891	56072004
chr10	111016457	111017051
chr14	55191354	55192390
chr14	78730369	78731396
chr8	126118260	126119863
chr9	35064794	35065772
chr16	38567064	38567792
chr1	36082810	36083183
chr16	33587072	33588088
chr7	140649115	140650031
chr15	33791801	33793186
chr2	179801712	179801958
chr11	106594624	106595698
chr5	140914549	140915767
chr13	63818287	63818856
chrX	49614636	49615671
chr2	52434315	52434842
chr8	126065438	126066609
chr8	126121706	126122450
chr13	19792655	19793200
chr4	40815401	40816321
chr1	137709075	137710287
chr6	42383515	42383957
chr17	46235269	46236153
chr3	57972332	57973232
chr11	108128337	108128851
chr8	120141792	120142534
chr4	53128722	53129047
chr4	141322697	141323890
chr10	84253945	84254261
chr4	120385476	120387192
chr18	83024028	83024589
chr4	130462079	130462659
chr8	126090852	126092088
chr15	57537264	57537851
chr11	121172394	121172887
chr7	148956691	148957422
chr7	71870490	71871234
chr2	17631741	17632520
chr4	124248149	124248577
chr6	53456653	53457738
chr2	52528714	52529220
chr12	34640520	34641179
chr7	125607627	125608328
chr8	26904180	26904610
chr2	120343884	120344972
chr16	11423396	11424313
chr15	27023609	27024372
chr8	11098292	11098952
chr9	67325112	67325831
chr8	126131820	126133432
chr5	117194168	117194858
chr11	69228561	69230005
chr6	90455969	90457452
chr14	103297307	103298308
chr14	12080169	12080837
chr4	107687768	107688368
chr9	67146960	67147364
chr8	8968667	8970809
chr11	75168757	75169543
chr15	32708111	32709423
chr18	32081551	32082299
chr9	49403536	49404058
chr8	122709836	122711023
chr14	63673280	63674072
chr17	53794289	53794879
chr8	126081012	126082511
chr8	110028068	110028745
chr16	43619309	43619950
chr1	77207151	77207892
chr10	94850483	94851013
chr8	126067389	126070453
chr10	122620304	122620686
chr13	42493149	42494394
chr17	32033675	32034836
chr6	100669755	100670730
chr1	93352039	93353882
chr17	32055994	32057036
chr12	86926868	86927161
chr5	137142812	137145039
chr3	151986940	151987211
chr2	33171679	33172607
chr4	87729716	87730681
chr5	125447087	125447838
chr16	43965845	43966576
chr8	109309590	109309886
chr7	87301452	87302084
chr2	173239134	173240110
chr16	35154143	35156821
chr10	60279353	60280398
chr14	94289490	94290714
chr9	45368904	45370315
chr6	145717114	145718467
chr10	116462696	116463370
chr5	116898779	116899294
chr8	24642860	24643817
chr7	130164266	130164831
chr8	126077981	126078907
chr6	123648647	123649191
chr14	119381053	119382466
chrX	70710674	70711342
chr1	169317121	169318128
chr6	51166181	51166885
chr18	55232683	55234183
chr19	54118927	54120318
chr17	32048386	32054378
chr2	101792933	101793556
chr8	126079299	126080546
chr19	43818777	43819358
chr8	126136940	126137837
chr1	193235542	193236330
chr19	10134265	10135578
chr17	47899237	47900713
chr12	34933139	34933875
chr16	85747768	85748779
chr11	32536048	32536646
chr8	126114163	126114775
chr1	23179889	23180547
chr11	49040911	49041617
chr8	74811730	74812382
chr19	5751663	5752063
chr4	97923763	97925822
chr8	123890128	123890995
chr18	53857873	53858531
chr12	34820791	34821588
chr5	93237952	93239048
chr11	23041273	23041657
chr18	90771935	90772000
chr14	60612989	60613352
chr8	126074175	126077881
chr8	26112287	26112901
chr11	22287261	22288098
chr5	135241095	135241849
chr8	87297644	87298215
chr1	3661428	3662290
chr3	109272127	109272819
chr10	125377496	125378183
chr2	32149673	32150353
chr17	56861693	56862311
chr14	103299565	103300560
chr5	35621330	35622751
chr10	77559042	77559630
chr16	93878469	93879023
chr16	92196760	92197817
chr16	33735846	33737651
chr9	43914789	43916263
chr18	52735941	52736428
chr17	7775541	7776552
chr13	63769861	63770471
chr14	47304203	47304693
chr16	44141399	44141996
chr4	90393169	90393349
chr6	122445188	122445945
chr8	126099432	126100879
chrX	12402367	12402916
chr12	103097966	103099475
chr12	52835304	52836202
chr5	36264050	36264918
chr7	96326944	96327597
chr3	122826626	122827400
chr9	77892868	77893378
chr18	24417516	24417922
chr4	144538904	144540244
chr1	36086844	36087850
chr8	126119993	126121049
chr13	64502057	64502722
chr11	120326580	120327591
chr5	91502522	91503997
chr14	58429623	58430367
chr13	96254571	96255146
chr1	134245676	134246366
chr11	49041677	49042310
chr13	98688362	98688895
chr18	33244447	33245252
chr18	36485163	36485518
chr8	88395312	88396126
chr17	80180316	80181728
chr2	181041819	181042134
chr19	16440743	16441589
chr7	36171367	36172183
chr12	12816654	12818030
chr1	99868812	99869768
chr10	85922023	85923154
chr1	64802437	64804810
chrX	33867567	33871582
chr5	50381882	50382739
chr4	99920229	99921346
chr19	60515705	60516911
chr9	87953202	87954186
chr5	150717855	150718772
chr2	65633774	65634050
chr17	6907075	6907401
chr8	126133561	126135139
chr15	3433400	3434281
chr14	30311484	30312581
chr8	59839665	59840474
chr14	35314606	35316711
chr1	30797725	30798018
chr2	156741255	156741723
chr17	85150099	85150637
chr8	126101239	126102912
chr5	130551856	130552915
chr5	145664860	145665978
chr14	41885890	41886386
chr14	76625443	76626381
chr13	23216866	23217221
chr1	185865588	185866339
chr16	65814940	65816270
chr3	85631142	85631764
chrX	131618710	131619360
chr17	84289084	84290036
chr15	85952336	85953566
chr2	122607189	122607951
chr1	35936285	35936870
chr8	72971451	72972385
chr17	81288394	81288896
chr6	6779223	6781289
chr14	16270697	16271913
chr3	94739178	94739717
chr7	133764147	133766011
chr12	16082099	16082615
chr10	56654913	56655430
chr10	79810136	79811581
chr7	3373286	3373817
chrX	131621234	131622080
chr8	126130042	126131443
chr8	126106368	126107283
chr16	86694733	86695304
chr9	87791842	87792845

## Sheet: GFP-.502-HOMERresults
Output of the HOMER findMotifsgenome.pl script for the GFPlow bulk ATACseq enriched DAPs.
Motif Name	Consensus	P-value	Log P-value	q-value (Benjamini)	# of Target Sequences with Motif(of 502)	% of Target Sequences with Motif	# of Background Sequences with Motif(of 49000)	% of Background Sequences with Motif
ZNF41(Zf)/HEK293-ZNF41.GFP-ChIP-Seq(GSE58341)/Homer	CCTCATGGTGYCYTWYTCCCTTGTG	1e-14	-33.88	0	32	0.0637	519.4	0.0106
NF1:FOXA1(CTF,Forkhead)/LNCAP-FOXA1-ChIP-Seq(GSE27824)/Homer	WNTGTTTRYTTTGGCA	1e-11	-25.66	0	37	0.0737	937	0.0192
Atf2(bZIP)/3T3L1-Atf2-ChIP-Seq(GSE56872)/Homer	NRRTGACGTCAT	1e-09	-22.73	0	101	0.2012	5122	0.1047
Atf7(bZIP)/3T3L1-Atf7-ChIP-Seq(GSE56872)/Homer	NGRTGACGTCAY	1e-09	-22.06	0	129	0.257	7304.2	0.1494
c-Jun-CRE(bZIP)/K562-cJun-ChIP-Seq(GSE31477)/Homer	ATGACGTCATCY	1e-09	-21.28	0	92	0.1833	4605.3	0.0942
HLF(bZIP)/HSC-HLF.Flag-ChIP-Seq(GSE69817)/Homer	RTTATGYAAB	1e-07	-16.72	0	169	0.3367	11317.3	0.2314
Atf1(bZIP)/K562-ATF1-ChIP-Seq(GSE31477)/Homer	GATGACGTCA	1e-06	-15.17	0	152	0.3028	10113.3	0.2068
NF1-halfsite(CTF)/LNCaP-NF1-ChIP-Seq(Unpublished)/Homer	YTGCCAAG	1e-05	-13.51	0.0001	343	0.6833	28385.6	0.5804
NF1(CTF)/LNCAP-NF1-ChIP-Seq(Unpublished)/Homer	CYTGGCABNSTGCCAR	0.0001	-10.73	0.0009	115	0.2291	7738.3	0.1582
EKLF(Zf)/Erythrocyte-Klf1-ChIP-Seq(GSE20478)/Homer	NWGGGTGTGGCY	0.0001	-10.57	0.0009	81	0.1614	4984.2	0.1019
CEBP(bZIP)/ThioMac-CEBPb-ChIP-Seq(GSE21512)/Homer	ATTGCGCAAC	0.001	-8.225	0.0089	123	0.245	8911.6	0.1822
JunD(bZIP)/K562-JunD-ChIP-Seq/Homer	ATGACGTCATCN	0.001	-8.209	0.0089	28	0.0558	1308	0.0267
Gata2(Zf)/K562-GATA2-ChIP-Seq(GSE18829)/Homer	BBCTTATCTS	0.001	-7.592	0.0141	137	0.2729	10287.2	0.2104
Atf4(bZIP)/MEF-Atf4-ChIP-Seq(GSE35681)/Homer	MTGATGCAAT	0.001	-7.442	0.0152	58	0.1155	3623.8	0.0741
TEAD2(TEA)/Py2T-Tead2-ChIP-Seq(GSE55709)/Homer	CCWGGAATGY	0.01	-6.876	0.0251	123	0.245	9223.8	0.1886
TEAD(TEA)/Fibroblast-PU.1-ChIP-Seq(Unpublished)/Homer	YCWGGAATGY	0.01	-6.781	0.0258	142	0.2829	10939.4	0.2237
Klf4(Zf)/mES-Klf4-ChIP-Seq(GSE11431)/Homer	GCCACACCCA	0.01	-6.631	0.0282	111	0.2211	8228.7	0.1683
Gata1(Zf)/K562-GATA1-ChIP-Seq(GSE18829)/Homer	SAGATAAGRV	0.01	-6.262	0.0386	121	0.241	9201.4	0.1882
Srebp2(bHLH)/HepG2-Srebp2-ChIP-Seq(GSE31477)/Homer	CGGTCACSCCAC	0.01	-5.888	0.0531	40	0.0797	2439.4	0.0499
Pitx1:Ebox(Homeobox,bHLH)/Hindlimb-Pitx1-ChIP-Seq(GSE41591)/Homer	YTAATTRAWWCCAGATGT	0.01	-5.737	0.0587	45	0.0896	2855.3	0.0584
ZSCAN22(Zf)/HEK293-ZSCAN22.GFP-ChIP-Seq(GSE58341)/Homer	SMCAGTCWGAKGGAGGAGGC	0.01	-5.568	0.0662	29	0.0578	1643	0.0336
Foxa3(Forkhead)/Liver-Foxa3-ChIP-Seq(GSE77670)/Homer	BSNTGTTTACWYWGN	0.01	-5.398	0.0749	74	0.1474	5317.6	0.1087
RORgt(NR)/EL4-RORgt.Flag-ChIP-Seq(GSE56019)/Homer	AAYTAGGTCA	0.01	-5.336	0.0762	36	0.0717	2207.2	0.0451
TEAD4(TEA)/Tropoblast-Tead4-ChIP-Seq(GSE37350)/Homer	CCWGGAATGY	0.01	-5.263	0.0786	174	0.3466	14321.7	0.2929
Mef2d(MADS)/Retina-Mef2d-ChIP-Seq(GSE61391)/Homer	GCTATTTTTAGC	0.01	-5.009	0.0972	39	0.0777	2493.8	0.051
SpiB(ETS)/OCILY3-SPIB-ChIP-Seq(GSE56857)/Homer	AAAGRGGAAGTG	0.01	-4.817	0.1133	59	0.1175	4172.1	0.0853
EWS:FLI1-fusion(ETS)/SK_N_MC-EWS:FLI1-ChIP-Seq(SRA014231)/Homer	VACAGGAAAT	0.01	-4.789	0.1133	131	0.261	10524.7	0.2152
Hoxc9(Homeobox)/Ainv15-Hoxc9-ChIP-Seq(GSE21812)/Homer	GGCCATAAATCA	0.01	-4.719	0.116	96	0.1912	7401.9	0.1514
IRF3(IRF)/BMDM-Irf3-ChIP-Seq(GSE67343)/Homer	AGTTTCAKTTTC	0.1	-4.47	0.1437	71	0.1414	5278	0.1079
CEBP:AP1(bZIP)/ThioMac-CEBPb-ChIP-Seq(GSE21512)/Homer	DRTGTTGCAA	0.1	-4.454	0.1437	133	0.2649	10817.5	0.2212
FOXK2(Forkhead)/U2OS-FOXK2-ChIP-Seq(E-MTAB-2204)/Homer	SCHTGTTTACAT	0.1	-4.439	0.1437	126	0.251	10183.7	0.2082
HOXB13(Homeobox)/ProstateTumor-HOXB13-ChIP-Seq(GSE56288)/Homer	TTTTATKRGG	0.1	-4.249	0.1624	189	0.3765	16098.8	0.3292
Gata6(Zf)/HUG1N-GATA6-ChIP-Seq(GSE51936)/Homer	YCTTATCTBN	0.1	-4.223	0.1624	164	0.3267	13764.6	0.2815
Srebp1a(bHLH)/HepG2-Srebp1a-ChIP-Seq(GSE31477)/Homer	RTCACSCCAY	0.1	-4.141	0.1703	52	0.1036	3727.5	0.0762
Unknown-ESC-element(?)/mES-Nanog-ChIP-Seq(GSE11724)/Homer	CACAGCAGGGGG	0.1	-4.062	0.1791	148	0.2948	12339	0.2523
Gata4(Zf)/Heart-Gata4-ChIP-Seq(GSE35151)/Homer	NBWGATAAGR	0.1	-3.846	0.216	178	0.3546	15226.4	0.3114
HRE(HSF)/HepG2-HSF1-ChIP-Seq(GSE31477)/Homer	BSTTCTRGAABVTTCYAGAA	0.1	-3.823	0.216	43	0.0857	3037.6	0.0621
Chop(bZIP)/MEF-Chop-ChIP-Seq(GSE35681)/Homer	ATTGCATCAT	0.1	-3.755	0.2241	40	0.0797	2800.1	0.0573
LXRE(NR),DR4/RAW-LXRb.biotin-ChIP-Seq(GSE21512)/Homer	RGGTTACTANAGGTCA	0.1	-3.539	0.2709	15	0.0299	839.8	0.0172
E2F4(E2F)/K562-E2F4-ChIP-Seq(GSE31477)/Homer	GGCGGGAAAH	0.1	-3.527	0.2709	66	0.1315	5090.4	0.1041
Mef2c(MADS)/GM12878-Mef2c-ChIP-Seq(GSE32465)/Homer	DCYAAAAATAGM	0.1	-3.473	0.2754	78	0.1554	6169.3	0.1262
STAT4(Stat)/CD4-Stat4-ChIP-Seq(GSE22104)/Homer	NYTTCCWGGAAR	0.1	-3.4	0.2894	181	0.3606	15703.3	0.3211
Unknown(Homeobox)/Limb-p300-ChIP-Seq/Homer	SSCMATWAAA	0.1	-3.222	0.3376	120	0.239	10076.9	0.2061
ZNF136(Zf)/HEK293-ZNF136.GFP-ChIP-Seq(GSE58341)/Homer	YTKGATAHAGTATTCTWGGTNGGCA	0.1	-3.165	0.3493	22	0.0438	1432.3	0.0293
PGR(NR)/EndoStromal-PGR-ChIP-Seq(GSE69539)/Homer	AAGAACATWHTGTTC	0.1	-3.129	0.3539	55	0.1096	4236.1	0.0866
KLF3(Zf)/MEF-Klf3-ChIP-Seq(GSE44748)/Homer	NRGCCCCRCCCHBNN	0.1	-3.037	0.3795	119	0.2371	10059.5	0.2057
Tlx?(NR)/NPC-H3K4me1-ChIP-Seq(GSE16256)/Homer	CTGGCAGSCTGCCA	0.1	-2.947	0.4065	110	0.2191	9265.2	0.1895
GATA:SCL(Zf,bHLH)/Ter119-SCL-ChIP-Seq(GSE18720)/Homer	CRGCTGBNGNSNNSAGATAA	0.1	-2.912	0.4123	31	0.0618	2221.6	0.0454
FOXP1(Forkhead)/H9-FOXP1-ChIP-Seq(GSE31006)/Homer	NYYTGTTTACHN	0.1	-2.701	0.4988	85	0.1693	7069.5	0.1446
CEBP:CEBP(bZIP)/MEF-Chop-ChIP-Seq(GSE35681)/Homer	NTNATGCAAYMNNHTGMAAY	0.1	-2.6	0.5408	27	0.0538	1950.4	0.0399
FoxL2(Forkhead)/Ovary-FoxL2-ChIP-Seq(GSE60858)/Homer	WWTRTAAACAVG	0.1	-2.468	0.6049	154	0.3068	13604	0.2782
Foxo3(Forkhead)/U2OS-Foxo3-ChIP-Seq(E-MTAB-2701)/Homer	DGTAAACA	0.1	-2.423	0.6205	132	0.2629	11553.9	0.2363
IRF2(IRF)/Erythroblas-IRF2-ChIP-Seq(GSE36985)/Homer	GAAASYGAAASY	0.1	-2.375	0.6387	22	0.0438	1575.5	0.0322
HOXD13(Homeobox)/Chicken-Hoxd13-ChIP-Seq(GSE38910)/Homer	NCYAATAAAA	0.1	-2.351	0.642	177	0.3526	15854	0.3242
HOXA2(Homeobox)/mES-Hoxa2-ChIP-Seq(Donaldson_et_al.)/Homer	GYCATCMATCAT	1	-2.214	0.7234	22	0.0438	1609.1	0.0329
ZNF16(Zf)/HEK293-ZNF16.GFP-ChIP-Seq(GSE58341)/Homer	MACCTTCYATGGCTCCCTAKTGCCY	1	-2.212	0.7234	4	0.008	176.9	0.0036
bZIP:IRF(bZIP,IRF)/Th17-BatF-ChIP-Seq(GSE39756)/Homer	NAGTTTCABTHTGACTNW	1	-2.199	0.7234	93	0.1853	8019.1	0.164
MafK(bZIP)/C2C12-MafK-ChIP-Seq(GSE36030)/Homer	GCTGASTCAGCA	1	-2.17	0.7234	60	0.1195	4995.4	0.1021
CArG(MADS)/PUER-Srf-ChIP-Seq(Sullivan_et_al.)/Homer	CCATATATGGNM	1	-2.101	0.7551	61	0.1215	5113.1	0.1046
CDX4(Homeobox)/ZebrafishEmbryos-Cdx4.Myc-ChIP-Seq(GSE48254)/Homer	NGYCATAAAWCH	1	-2.062	0.7714	148	0.2948	13261.3	0.2712
Oct4:Sox17(POU,Homeobox,HMG)/F9-Sox17-ChIP-Seq(GSE44553)/Homer	CCATTGTATGCAAAT	1	-2.016	0.7947	26	0.0518	2001.7	0.0409
Egr2(Zf)/Thymocytes-Egr2-ChIP-Seq(GSE34254)/Homer	NGCGTGGGCGGR	1	-2.005	0.7947	42	0.0837	3426	0.0701
Tcfcp2l1(CP2)/mES-Tcfcp2l1-ChIP-Seq(GSE11431)/Homer	NRAACCRGTTYRAACCRGYT	1	-1.952	0.8204	41	0.0817	3353.5	0.0686
NRF(NRF)/Promoter/Homer	STGCGCATGCGC	1	-1.836	0.9073	37	0.0737	3032.2	0.062
EWS:ERG-fusion(ETS)/CADO_ES1-EWS:ERG-ChIP-Seq(SRA014231)/Homer	ATTTCCTGTN	1	-1.805	0.9213	138	0.2749	12467.5	0.2549
Rfx6(HTH)/Min6b1-Rfx6.HA-ChIP-Seq(GSE62844)/Homer	TGTTKCCTAGCAACM	1	-1.688	1	219	0.4363	20322.8	0.4156
Fox:Ebox(Forkhead,bHLH)/Panc1-Foxa2-ChIP-Seq(GSE47459)/Homer	NNNVCTGWGYAAACASN	1	-1.624	1	201	0.4004	18630.1	0.3809
GABPA(ETS)/Jurkat-GABPa-ChIP-Seq(GSE17954)/Homer	RACCGGAAGT	1	-1.535	1	174	0.3466	16096.5	0.3291
Prop1(Homeobox)/GHFT1-PROP1.biotin-ChIP-Seq(GSE77302)/Homer	NTAATBNAATTA	1	-1.52	1	87	0.1733	7810.9	0.1597
ETS1(ETS)/Jurkat-ETS1-ChIP-Seq(GSE17954)/Homer	ACAGGAAGTG	1	-1.492	1	198	0.3944	18442.2	0.3771
Hnf1(Homeobox)/Liver-Foxa2-Chip-Seq(GSE25694)/Homer	GGTTAAWCATTAA	1	-1.491	1	22	0.0438	1792.4	0.0367
Ets1-distal(ETS)/CD4+-PolII-ChIP-Seq(Barski_et_al.)/Homer	MACAGGAAGT	1	-1.473	1	67	0.1335	5955.2	0.1218
ZNF165(Zf)/WHIM12-ZNF165-ChIP-Seq(GSE65937)/Homer	AAGGKGRCGCAGGCA	1	-1.472	1	32	0.0637	2706.5	0.0553
ZNF415(Zf)/HEK293-ZNF415.GFP-ChIP-Seq(GSE58341)/Homer	GRTGMTRGAGCC	1	-1.467	1	121	0.241	11070.2	0.2264
HNF4a(NR),DR1/HepG2-HNF4a-ChIP-Seq(GSE25021)/Homer	CARRGKBCAAAGTYCA	1	-1.463	1	108	0.2151	9835.4	0.2011
Zic3(Zf)/mES-Zic3-ChIP-Seq(GSE37889)/Homer	GGCCYCCTGCTGDGH	1	-1.457	1	128	0.255	11745.1	0.2402
Phox2a(Homeobox)/Neuron-Phox2a-ChIP-Seq(GSE31456)/Homer	YTAATYNRATTA	1	-1.452	1	55	0.1096	4843.7	0.099
GRE(NR),IR3/A549-GR-ChIP-Seq(GSE32465)/Homer	NRGVACABNVTGTYCY	1	-1.438	1	31	0.0618	2627.5	0.0537
HOXA9(Homeobox)/HSC-Hoxa9-ChIP-Seq(GSE33509)/Homer	GGCCATAAATCA	1	-1.418	1	108	0.2151	9866	0.2017
Lhx1(Homeobox)/EmbryoCarcinoma-Lhx1-ChIP-Seq(GSE70957)/Homer	NNYTAATTAR	1	-1.417	1	168	0.3347	15611	0.3192
DUX4(Homeobox)/Myoblasts-DUX4.V5-ChIP-Seq(GSE75791)/Homer	NWTAAYCYAATCAWN	1	-1.407	1	9	0.0179	663.8	0.0136
p53(p53)/mES-cMyc-ChIP-Seq(GSE11431)/Homer	ACATGCCCGGGCAT	1	-1.404	1	5	0.01	326.4	0.0067
IRF1(IRF)/PBMC-IRF1-ChIP-Seq(GSE43036)/Homer	GAAAGTGAAAGT	1	-1.404	1	25	0.0498	2091.5	0.0428
PAX6(Paired,Homeobox)/Forebrain-Pax6-ChIP-Seq(GSE66961)/Homer	NGTGTTCAVTSAAGCGKAAA	1	-1.364	1	20	0.0398	1650.7	0.0338
CRE(bZIP)/Promoter/Homer	CSGTGACGTCAC	1	-1.349	1	38	0.0757	3308.2	0.0676
DMRT1(DM)/Testis-DMRT1-ChIP-Seq(GSE64892)/Homer	TWGHWACAWTGTWDC	1	-1.347	1	47	0.0936	4147.3	0.0848
EHF(ETS)/LoVo-EHF-ChIP-Seq(GSE49402)/Homer	AVCAGGAAGT	1	-1.32	1	233	0.4641	21976.4	0.4494
Sp5(Zf)/mES-Sp5.Flag-ChIP-Seq(GSE72989)/Homer	RGKGGGCGGAGC	1	-1.315	1	187	0.3725	17525.5	0.3584
ETS:RUNX(ETS,Runt)/Jurkat-RUNX1-ChIP-Seq(GSE17954)/Homer	RCAGGATGTGGT	1	-1.285	1	21	0.0418	1766.8	0.0361
Elk1(ETS)/Hela-Elk1-ChIP-Seq(GSE31477)/Homer	HACTTCCGGY	1	-1.279	1	101	0.2012	9294.7	0.1901
Foxa2(Forkhead)/Liver-Foxa2-ChIP-Seq(GSE25694)/Homer	CYTGTTTACWYW	1	-1.268	1	139	0.2769	12940.3	0.2646
PU.1(ETS)/ThioMac-PU.1-ChIP-Seq(GSE21512)/Homer	AGAGGAAGTG	1	-1.248	1	105	0.2092	9698.4	0.1983
Stat3(Stat)/mES-Stat3-ChIP-Seq(GSE11431)/Homer	CTTCCGGGAA	1	-1.225	1	98	0.1952	9046.3	0.185
GRE(NR),IR3/RAW264.7-GRE-ChIP-Seq(Unpublished)/Homer	VAGRACAKWCTGTYC	1	-1.215	1	50	0.0996	4495	0.0919
ISRE(IRF)/ThioMac-LPS-Expression(GSE23622)/Homer	AGTTTCASTTTC	1	-1.214	1	11	0.0219	880.9	0.018
Mef2b(MADS)/HEK293-Mef2b.V5-ChIP-Seq(GSE67450)/Homer	GCTATTTTTGGM	1	-1.203	1	128	0.255	11936.7	0.2441
ZNF382(Zf)/HEK293-ZNF382.GFP-ChIP-Seq(GSE58341)/Homer	GNCTGTASTRNTGBCTCHTT	1	-1.196	1	7	0.0139	529.6	0.0108
E2F3(E2F)/MEF-E2F3-ChIP-Seq(GSE71376)/Homer	BTKGGCGGGAAA	1	-1.194	1	90	0.1793	8304.6	0.1698
NFkB-p65-Rel(RHD)/ThioMac-LPS-Expression(GSE23622)/Homer	GGAAATTCCC	1	-1.194	1	11	0.0219	885.2	0.0181
Klf9(Zf)/GBM-Klf9-ChIP-Seq(GSE62211)/Homer	GCCACRCCCACY	1	-1.185	1	93	0.1853	8597	0.1758
Tbx20(T-box)/Heart-Tbx20-ChIP-Seq(GSE29636)/Homer	GGTGYTGACAGS	1	-1.182	1	46	0.0916	4136.6	0.0846
IRF:BATF(IRF:bZIP)/pDC-Irf8-ChIP-Seq(GSE66899)/Homer	CTTTCANTATGACTV	1	-1.173	1	21	0.0418	1804.7	0.0369
ZNF264(Zf)/HEK293-ZNF264.GFP-ChIP-Seq(GSE58341)/Homer	RGGGCACTAACY	1	-1.167	1	131	0.261	12254.1	0.2506
ERG(ETS)/VCaP-ERG-ChIP-Seq(GSE14097)/Homer	ACAGGAAGTG	1	-1.145	1	276	0.5498	26323.3	0.5383
Elk4(ETS)/Hela-Elk4-ChIP-Seq(GSE31477)/Homer	NRYTTCCGGY	1	-1.137	1	97	0.1932	9015.1	0.1843
Pax8(Paired,Homeobox)/Thyroid-Pax8-ChIP-Seq(GSE26938)/Homer	GTCATGCHTGRCTGS	1	-1.129	1	79	0.1574	7300.4	0.1493
TFE3(bHLH)/MEF-TFE3-ChIP-Seq(GSE75757)/Homer	GTCACGTGACYV	1	-1.117	1	15	0.0299	1270.7	0.026
ETS(ETS)/Promoter/Homer	AACCGGAAGT	1	-1.111	1	63	0.1255	5787	0.1183
FOXK1(Forkhead)/HEK293-FOXK1-ChIP-Seq(GSE51673)/Homer	NVWTGTTTAC	1	-1.106	1	168	0.3347	15875.1	0.3246
ZFP3(Zf)/HEK293-ZFP3.GFP-ChIP-Seq(GSE58341)/Homer	GGGTTTTGAAGGATGARTAGGAGTT	1	-1.068	1	1	0.002	41.2	0.0008
Stat3+il21(Stat)/CD4-Stat3-ChIP-Seq(GSE19198)/Homer	SVYTTCCNGGAARB	1	-1.058	1	137	0.2729	12926.5	0.2643
STAT6(Stat)/CD4-Stat6-ChIP-Seq(GSE22104)/Homer	ABTTCYYRRGAA	1	-1.046	1	90	0.1793	8414	0.1721
ZNF528(Zf)/HEK293-ZNF528.GFP-ChIP-Seq(GSE58341)/Homer	AGAAATGACTTCCCT	1	-1.032	1	2	0.004	122.5	0.0025
STAT6(Stat)/Macrophage-Stat6-ChIP-Seq(GSE38377)/Homer	TTCCKNAGAA	1	-1.02	1	92	0.1833	8626.8	0.1764
DMRT6(DM)/Testis-DMRT6-ChIP-Seq(GSE60440)/Homer	YDGHTACAWTGTADC	1	-1.013	1	40	0.0797	3659.7	0.0748
RAR:RXR(NR),DR5/ES-RAR-ChIP-Seq(GSE56893)/Homer	RGGTCADNNAGAGGTCAV	1	-1.009	1	7	0.0139	567.2	0.0116
FXR(NR),IR1/Liver-FXR-ChIP-Seq(Chong_et_al.)/Homer	AGGTCANTGACCTB	1	-1.005	1	79	0.1574	7390.5	0.1511
PU.1:IRF8(ETS:IRF)/pDC-Irf8-ChIP-Seq(GSE66899)/Homer	GGAAGTGAAAST	1	-0.9597	1	35	0.0697	3213.3	0.0657
FOXA1(Forkhead)/MCF7-FOXA1-ChIP-Seq(GSE26831)/Homer	WAAGTAAACA	1	-0.9351	1	173	0.3446	16528.7	0.338
STAT1(Stat)/HelaS3-STAT1-ChIP-Seq(GSE12782)/Homer	NATTTCCNGGAAAT	1	-0.8755	1	54	0.1076	5084.9	0.104
GATA3(Zf)/iTreg-Gata3-ChIP-Seq(GSE20898)/Homer	AGATAASR	1	-0.8639	1	223	0.4442	21463.9	0.4389
Lhx2(Homeobox)/HFSC-Lhx2-ChIP-Seq(GSE48068)/Homer	TAATTAGN	1	-0.8588	1	160	0.3187	15349.7	0.3139
Pdx1(Homeobox)/Islet-Pdx1-ChIP-Seq(SRA008281)/Homer	YCATYAATCA	1	-0.8255	1	141	0.2809	13542.7	0.2769
Fli1(ETS)/CD8-FLI-ChIP-Seq(GSE20898)/Homer	NRYTTCCGGH	1	-0.8025	1	194	0.3865	18716	0.3827
p73(p53)/Trachea-p73-ChIP-Seq(PRJNA310161)/Homer	NRRRCAWGTCCDGRCATGYY	1	-0.7777	1	11	0.0219	1007.2	0.0206
FOXA1(Forkhead)/LNCAP-FOXA1-ChIP-Seq(GSE27824)/Homer	WAAGTAAACA	1	-0.7566	1	200	0.3984	19356	0.3958
MafB(bZIP)/BMM-Mafb-ChIP-Seq(GSE75722)/Homer	WNTGCTGASTCAGCANWTTY	1	-0.7444	1	89	0.1773	8580	0.1754
HRE(HSF)/Striatum-HSF1-ChIP-Seq(GSE38000)/Homer	TTCTAGAABNTTCTA	1	-0.7345	1	43	0.0857	4123.3	0.0843
GATA(Zf),IR4/iTreg-Gata3-ChIP-Seq(GSE20898)/Homer	NAGATWNBNATCTNN	1	-0.7004	1	12	0.0239	1133.9	0.0232
IRF8(IRF)/BMDM-IRF8-ChIP-Seq(GSE77884)/Homer	GRAASTGAAAST	1	-0.6864	1	53	0.1056	5133.8	0.105
Twist(bHLH)/HMLE-TWIST1-ChIP-Seq(Chang_et_al)/Homer	VCAKCTGGNNNCCAGMTGBN	1	-0.6737	1	32	0.0637	3096.9	0.0633
ZNF519(Zf)/HEK293-ZNF519.GFP-ChIP-Seq(GSE58341)/Homer	GAGSCCGAGC	1	-0.6734	1	41	0.0817	3974.2	0.0813
SPDEF(ETS)/VCaP-SPDEF-ChIP-Seq(SRA014231)/Homer	ASWTCCTGBT	1	-0.6694	1	191	0.3805	18594.4	0.3802
E2F(E2F)/Hela-CellCycle-Expression/Homer	TTSGCGCGAAAA	1	-0.6625	1	6	0.012	561.4	0.0115
E-box(bHLH)/Promoter/Homer	SSGGTCACGTGA	1	-0.6527	1	12	0.0239	1153.2	0.0236
Cdx2(Homeobox)/mES-Cdx2-ChIP-Seq(GSE14586)/Homer	GYMATAAAAH	1	-0.6512	1	112	0.2231	10920.8	0.2233
Egr1(Zf)/K562-Egr1-ChIP-Seq(GSE32465)/Homer	TGCGTGGGYG	1	-0.6071	1	134	0.2669	13122.1	0.2683
GFY(?)/Promoter/Homer	ACTACAATTCCC	1	-0.6033	1	10	0.0199	977.5	0.02
Mef2a(MADS)/HL1-Mef2a.biotin-ChIP-Seq(GSE21529)/Homer	CYAAAAATAG	1	-0.6028	1	60	0.1195	5893.5	0.1205
Zfp809(Zf)/ES-Zfp809-ChIP-Seq(GSE70799)/Homer	GGGGCTYGKCTGGGA	1	-0.5907	1	40	0.0797	3942.4	0.0806
STAT5(Stat)/mCD4+-Stat5-ChIP-Seq(GSE12346)/Homer	RTTTCTNAGAAA	1	-0.5709	1	60	0.1195	5925.8	0.1212
GATA3(Zf),DR8/iTreg-Gata3-ChIP-Seq(GSE20898)/Homer	AGATSTNDNNDSAGATAASN	1	-0.5622	1	16	0.0319	1593.9	0.0326
KLF6(Zf)/PDAC-KLF6-ChIP-Seq(GSE64557)/Homer	MKGGGYGTGGCC	1	-0.5612	1	192	0.3825	18848.9	0.3854
Foxf1(Forkhead)/Lung-Foxf1-ChIP-Seq(GSE77951)/Homer	WWATRTAAACAN	1	-0.5414	1	152	0.3028	14973.2	0.3062
CTCF-SatelliteElement(Zf?)/CD4+-CTCF-ChIP-Seq(Barski_et_al.)/Homer	TGCAGTTCCMVNWRTGGCCA	1	-0.528	1	4	0.008	401.8	0.0082
Foxh1(Forkhead)/hESC-FOXH1-ChIP-Seq(GSE29422)/Homer	NNTGTGGATTSS	1	-0.5265	1	96	0.1912	9511.7	0.1945
RUNX2(Runt)/PCa-RUNX2-ChIP-Seq(GSE33889)/Homer	NWAACCACADNN	1	-0.4914	1	168	0.3347	16616.8	0.3398
CLOCK(bHLH)/Liver-Clock-ChIP-Seq(GSE39860)/Homer	GHCACGTG	1	-0.4892	1	98	0.1952	9758.2	0.1995
ZNF675(Zf)/HEK293-ZNF675.GFP-ChIP-Seq(GSE58341)/Homer	ARGAGGMCAAAATGW	1	-0.4792	1	24	0.0478	2447.7	0.0501
Foxo1(Forkhead)/RAW-Foxo1-ChIP-Seq(Fan_et_al.)/Homer	CTGTTTAC	1	-0.4791	1	290	0.5777	28527.6	0.5833
Zic(Zf)/Cerebellum-ZIC1.2-ChIP-Seq(GSE60731)/Homer	CCTGCTGAGH	1	-0.4722	1	169	0.3367	16746.4	0.3424
E2F7(E2F)/Hela-E2F7-ChIP-Seq(GSE32673)/Homer	VDTTTCCCGCCA	1	-0.467	1	13	0.0259	1347.2	0.0275
ZNF317(Zf)/HEK293-ZNF317.GFP-ChIP-Seq(GSE58341)/Homer	GTCWGCTGTYYCTCT	1	-0.458	1	16	0.0319	1657.1	0.0339
Usf2(bHLH)/C2C12-Usf2-ChIP-Seq(GSE36030)/Homer	GTCACGTGGT	1	-0.4362	1	53	0.1056	5382.5	0.1101
CTCF(Zf)/CD4+-CTCF-ChIP-Seq(Barski_et_al.)/Homer	AYAGTGCCMYCTRGTGGCCA	1	-0.4013	1	30	0.0598	3120	0.0638
FOXM1(Forkhead)/MCF7-FOXM1-ChIP-Seq(GSE72977)/Homer	TRTTTACTTW	1	-0.3975	1	177	0.3526	17665.5	0.3612
ELF5(ETS)/T47D-ELF5-ChIP-Seq(GSE30407)/Homer	ACVAGGAAGT	1	-0.3915	1	133	0.2649	13358.4	0.2732
Sox17(HMG)/Endoderm-Sox17-ChIP-Seq(GSE61475)/Homer	CCATTGTTYB	1	-0.3804	1	117	0.2331	11802.5	0.2413
OCT:OCT(POU,Homeobox)/NPC-Brn1-ChIP-Seq(GSE35496)/Homer	ATGAATATTCATGAG	1	-0.3663	1	1	0.002	115.7	0.0024
PRDM14(Zf)/H1-PRDM14-ChIP-Seq(GSE22767)/Homer	RGGTCTCTAACY	1	-0.357	1	62	0.1235	6385.3	0.1306
ARE(NR)/LNCAP-AR-ChIP-Seq(GSE27824)/Homer	RGRACASNSTGTYCYB	1	-0.3537	1	60	0.1195	6190.8	0.1266
Tbox:Smad(T-box,MAD)/ESCd5-Smad2_3-ChIP-Seq(GSE29422)/Homer	AGGTGHCAGACA	1	-0.3532	1	38	0.0757	3980.5	0.0814
ELF1(ETS)/Jurkat-ELF1-ChIP-Seq(SRA014231)/Homer	AVCCGGAAGT	1	-0.3424	1	87	0.1733	8900.2	0.182
PRDM1(Zf)/Hela-PRDM1-ChIP-Seq(GSE31477)/Homer	ACTTTCACTTTC	1	-0.3415	1	94	0.1873	9597.8	0.1963
Brn2(POU,Homeobox)/NPC-Brn2-ChIP-Seq(GSE35496)/Homer	ATGAATATTC	1	-0.3409	1	11	0.0219	1223.1	0.025
MafF(bZIP)/HepG2-MafF-ChIP-Seq(GSE31477)/Homer	HWWGTCAGCAWWTTT	1	-0.3332	1	38	0.0757	4005.4	0.0819
BORIS(Zf)/K562-CTCFL-ChIP-Seq(GSE32465)/Homer	CNNBRGCGCCCCCTGSTGGC	1	-0.3145	1	44	0.0876	4638.7	0.0949
ZNF416(Zf)/HEK293-ZNF416.GFP-ChIP-Seq(GSE58341)/Homer	WDNCTGGGCA	1	-0.3093	1	255	0.508	25474.8	0.5209
Rbpj1(?)/Panc1-Rbpj1-ChIP-Seq(GSE47459)/Homer	HTTTCCCASG	1	-0.2959	1	248	0.494	24826.5	0.5077
Oct4(POU,Homeobox)/mES-Oct4-ChIP-Seq(GSE11431)/Homer	ATTTGCATAW	1	-0.29	1	65	0.1295	6795.1	0.1389
Pax7(Paired,Homeobox),longest/Myoblast-Pax7-ChIP-Seq(GSE25064)/Homer	NTAATTDGCYAATTANNWWD	1	-0.2881	1	3	0.006	381.6	0.0078
IRF4(IRF)/GM12878-IRF4-ChIP-Seq(GSE32465)/Homer	ACTGAAACCA	1	-0.2877	1	69	0.1375	7201.4	0.1473
Pax7(Paired,Homeobox),long/Myoblast-Pax7-ChIP-Seq(GSE25064)/Homer	TAATCHGATTAC	1	-0.2849	1	2	0.004	263.3	0.0054
Arnt:Ahr(bHLH)/MCF7-Arnt-ChIP-Seq(Lo_et_al.)/Homer	TBGCACGCAA	1	-0.2843	1	105	0.2092	10803.6	0.2209
ETV1(ETS)/GIST48-ETV1-ChIP-Seq(GSE22441)/Homer	AACCGGAAGT	1	-0.2831	1	234	0.4661	23495.8	0.4804
PAX5(Paired,Homeobox)/GM12878-PAX5-ChIP-Seq(GSE32465)/Homer	GCAGCCAAGCRTGACH	1	-0.268	1	72	0.1434	7540.5	0.1542
THRa(NR)/C17.2-THRa-ChIP-Seq(GSE38347)/Homer	GGTCANYTGAGGWCA	1	-0.2561	1	81	0.1614	8468.1	0.1732
ZNF189(Zf)/HEK293-ZNF189.GFP-ChIP-Seq(GSE58341)/Homer	TGGAACAGMA	1	-0.2529	1	161	0.3207	16422.2	0.3358
HIF-1a(bHLH)/MCF7-HIF1a-ChIP-Seq(GSE28352)/Homer	TACGTGCV	1	-0.2468	1	35	0.0697	3821.9	0.0782
Tbet(T-box)/CD8-Tbet-ChIP-Seq(GSE33802)/Homer	AGGTGTGAAM	1	-0.2449	1	174	0.3466	17724.2	0.3624
Hand2(bHLH)/Mesoderm-Hand2-ChIP-Seq(GSE61475)/Homer	TGACANARRCCAGRC	1	-0.2374	1	96	0.1912	10013.3	0.2048
REST-NRSF(Zf)/Jurkat-NRSF-ChIP-Seq/Homer	GGMGCTGTCCATGGTGCTGA	1	-0.2325	1	1	0.002	153.5	0.0031
Rfx5(HTH)/GM12878-Rfx5-ChIP-Seq(GSE31477)/Homer	SCCTAGCAACAG	1	-0.2286	1	70	0.1394	7421.9	0.1518
Ronin(THAP)/ES-Thap11-ChIP-Seq(GSE51522)/Homer	RACTACAACTCCCAGVAKGC	1	-0.2253	1	2	0.004	290.1	0.0059
GATA(Zf),IR3/iTreg-Gata3-ChIP-Seq(GSE20898)/Homer	NNNNNBAGATAWYATCTVHN	1	-0.2236	1	19	0.0378	2185.4	0.0447
PAX5(Paired,Homeobox),condensed/GM12878-PAX5-ChIP-Seq(GSE32465)/Homer	GTCACGCTCSCTGM	1	-0.2174	1	17	0.0339	1981	0.0405
COUP-TFII(NR)/Artia-Nr2f2-ChIP-Seq(GSE46497)/Homer	AGRGGTCA	1	-0.2174	1	278	0.5538	27960.6	0.5717
Hoxb4(Homeobox)/ES-Hoxb4-ChIP-Seq(GSE34014)/Homer	TGATTRATGGCY	1	-0.208	1	27	0.0538	3052.3	0.0624
Barx1(Homeobox)/Stomach-Barx1.3xFlag-ChIP-Seq(GSE69483)/Homer	AAACMATTAN	1	-0.2064	1	69	0.1375	7371.6	0.1507
Brn1(POU,Homeobox)/NPC-Brn1-ChIP-Seq(GSE35496)/Homer	TATGCWAATBAV	1	-0.2011	1	41	0.0817	4521.7	0.0925
Rfx2(HTH)/LoVo-RFX2-ChIP-Seq(GSE49402)/Homer	GTTGCCATGGCAACM	1	-0.1915	1	14	0.0279	1691	0.0346
OCT4-SOX2-TCF-NANOG(POU,Homeobox,HMG)/mES-Oct4-ChIP-Seq(GSE11431)/Homer	ATTTGCATAACAATG	1	-0.1873	1	24	0.0478	2770.4	0.0566
HNF1b(Homeobox)/PDAC-HNF1B-ChIP-Seq(GSE64557)/Homer	GTTAATNATTAA	1	-0.1833	1	16	0.0319	1919	0.0392
Brachyury(T-box)/Mesoendoderm-Brachyury-ChIP-exo(GSE54963)/Homer	ANTTMRCASBNNNGTGYKAAN	1	-0.1824	1	46	0.0916	5077.8	0.1038
EBNA1(EBV-virus)/Raji-EBNA1-ChIP-Seq(GSE30709)/Homer	GGYAGCAYDTGCTDCCCNNN	1	-0.1738	1	2	0.004	320.4	0.0066
[truncated: 169 more rows]

## Sheet: GFP+.enriched.3612.peaks
chromosome	start	end
chr9	115589617	115590392
[truncated: 3,612 more rows]

## Sheet: GFP+.3613-HOMERresults
Output of the HOMER findMotifsgenome.pl script for the GFPhigh bulk ATACseq enriched DAPs.
[truncated: 365 more rows]

[truncated: 4 more sheets: ECKO.472.enriched.peaks, ECKO.472-HOMERresults, WT.303.enriched.peaks, WT.303-HOMERresults]
